# Supplementary material for: Synthesis of Benzopyran–Phenylpropanoid Hybrids via Matsuda–Heck-Arylation and Allylic Oxidation
Source: PubMed Central journal article supplement (PMC11667724; doi:10.1021/acs.joc.4c02520), 2024-12-07
Supplement: jo4c02520_si_001.pdf [file jo4c02520_si_001.pdf]

## Supporting Information

### Synthesis of Benzopyran-Phenylpropanoid Hybrids via Matsuda-Heck-Arylation and Allylic Oxidation

Fabian Otte,<sup>a</sup> Julia Greese,<sup>a</sup> Stefan Foß,<sup>a</sup> Mandy Krüger,<sup>a</sup> Eric Sperlich,<sup>a</sup> George Kwesiga,<sup>a,b\*</sup>  
Bernd Schmidt<sup>a\*</sup>

<sup>a</sup> *Universität Potsdam, Institut für Chemie, Karl-Liebknecht-Straße 24-25, D-14476 Potsdam-Golm, Germany.*

<sup>b</sup> *Kabale University, Department of Chemistry, P.O. Box 317, Kabale, Uganda.*

E-mail: [gekwesiga@kab.ac.ug](mailto:gekwesiga@kab.ac.ug) (George Kwesiga); [bernd.schmidt@uni-potsdam.de](mailto:bernd.schmidt@uni-potsdam.de) (Bernd Schmidt)

#### Contents:

|          |                                                                  |             |
|----------|------------------------------------------------------------------|-------------|
| <b>A</b> | <b>Single crystal X-ray structure analysis of compounds 16cf</b> | <b>S2</b>   |
| <b>B</b> | <b>Syntheses of compounds 11d and 15b</b>                        | <b>S8</b>   |
| <b>C</b> | <b>Copies of <sup>1</sup>H and <sup>13</sup>C NMR spectra</b>    | <b>S25</b>  |
| <b>D</b> | <b>References</b>                                                | <b>S211</b> |

## A Single crystal X-ray structure analyses of compounds **16cf**

### 1 General details of X-ray structure analysis

The crystal structures were determined by single crystal structure analysis. Suitable single crystals were selected using a Leica M205C light microscope and separated with oil. **Figure S1** shows a single crystal of **16cf**. The X-ray crystal structure analysis was performed on a Stadivari diffractometer (Stoe) with monochromated Mo- $K\alpha$  radiation ( $\lambda = 0.71073 \text{ \AA}$ ). The data correction was performed using the program X-Area.<sup>1</sup> The structure was solved by direct methods and refined against  $F^2$  on all data by full-matrix least-squares using the SHELX suite of programs.<sup>2,3</sup> All non-hydrogen atoms were refined anisotropically; the hydrogen atoms were placed on calculated positions. **Table S1** was created using FinalCif.<sup>4</sup> The crystal structure was visualized with Diamond.<sup>5</sup> The data (**16cf**: CCD 2156920) can be obtained free of charge from The Cambridge Crystallographic Data Centre, <http://www.ccdc.cam.ac.uk>.

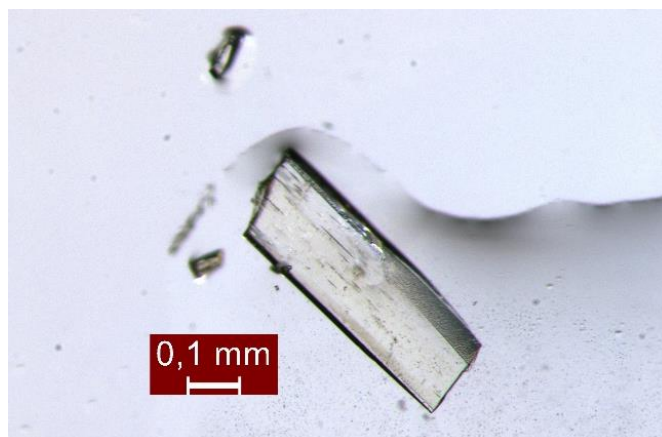

**Figure S1:** Microscope image of a single crystal of **16cf**.

## 2 Crystallographic Data:

**Table S1.** Crystal data and details of structure refinement for **16cf**.

|                                                |                                                                   |
|------------------------------------------------|-------------------------------------------------------------------|
| Compound                                       | <b>16cf</b>                                                       |
| CCDC number                                    | 2156920                                                           |
| Empirical formula                              | C <sub>28</sub> H <sub>28</sub> O <sub>6</sub>                    |
| Formula weight                                 | 460.50                                                            |
| Temperature [K]                                | 210                                                               |
| Crystal system                                 | triclinic                                                         |
| Space group                                    | $P\bar{1}$ (2)                                                    |
| <i>a</i> [Å]                                   | 10.0329(5)                                                        |
| <i>b</i> [Å]                                   | 12.4721(6)                                                        |
| <i>c</i> [Å]                                   | 20.1848(9)                                                        |
| $\alpha$ [°]                                   | 107.193(4)                                                        |
| $\beta$ [°]                                    | 99.409(4)                                                         |
| $\gamma$ [°]                                   | 91.739(4)                                                         |
| Volume [Å <sup>3</sup> ]                       | 2372.1(2)                                                         |
| <i>Z</i>                                       | 4                                                                 |
| $\rho_{\text{calc}}$ [gcm <sup>-3</sup> ]      | 1.289                                                             |
| $\mu$ [mm <sup>-1</sup> ]                      | 0.090                                                             |
| <i>F</i> (000)                                 | 976                                                               |
| Crystal size [mm <sup>3</sup> ]                | 0.400×0.245×0.095                                                 |
| Crystal color                                  | colorless                                                         |
| Crystal shape                                  | needle                                                            |
| Radiation                                      | MoK $\alpha$ ( $\lambda$ =0.71073 Å)                              |
| 2 $\theta$ range [°]                           | 4.30 to 59.98<br>(0.71 Å)                                         |
| Index ranges                                   | -14 ≤ <i>h</i> ≤ 12<br>-17 ≤ <i>k</i> ≤ 17<br>-28 ≤ <i>l</i> ≤ 28 |
| Reflections collected                          | 59370                                                             |
| Independent reflections                        | 13808<br>$R_{\text{int}} = 0.0392$<br>$R_{\text{sigma}} = 0.0374$ |
| Completeness to $\theta = 25^\circ$            | 99.8 %                                                            |
| Data / Restraints / Parameters                 | 13808/92/778                                                      |
| Goodness-of-fit on $F^2$                       | 1.067                                                             |
| Final <i>R</i> indexes [ $I \geq 2\sigma(I)$ ] | $R_1 = 0.0556$<br>$wR_2 = 0.1528$                                 |
| Final <i>R</i> indexes [all data]              | $R_1 = 0.1043$<br>$wR_2 = 0.1735$                                 |
| Largest peak/hole [eÅ <sup>-3</sup> ]          | 0.43/-0.35                                                        |

### 3 Visualization of the crystal structure and molecular structure for compound 16cf

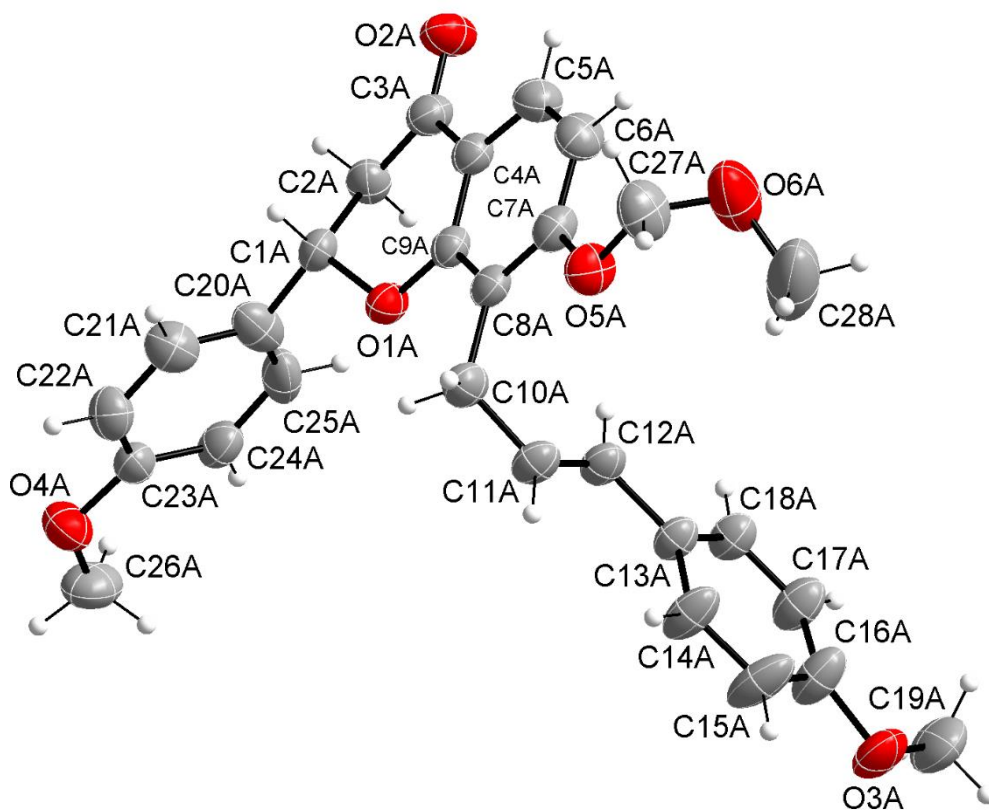

**Figure S2:** Molecular structure with atom labeling of the symmetry-independent molecule A in **16cf**. Displacement ellipsoids are shown at the 50% probability level.

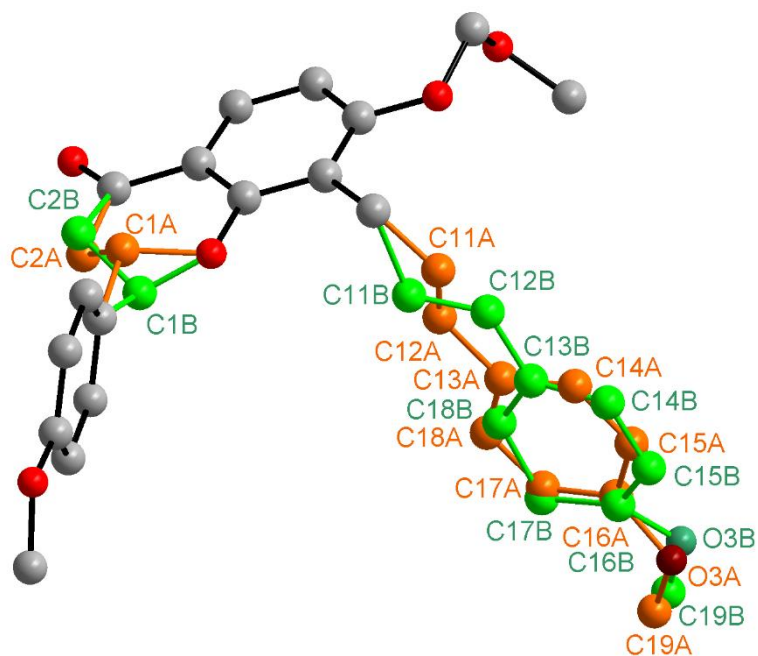

**Figure S3:** Disorder in the asymmetric molecule A in **16cf** with the main part shown in orange and the minor part shown in green color (hydrogens are omitted).

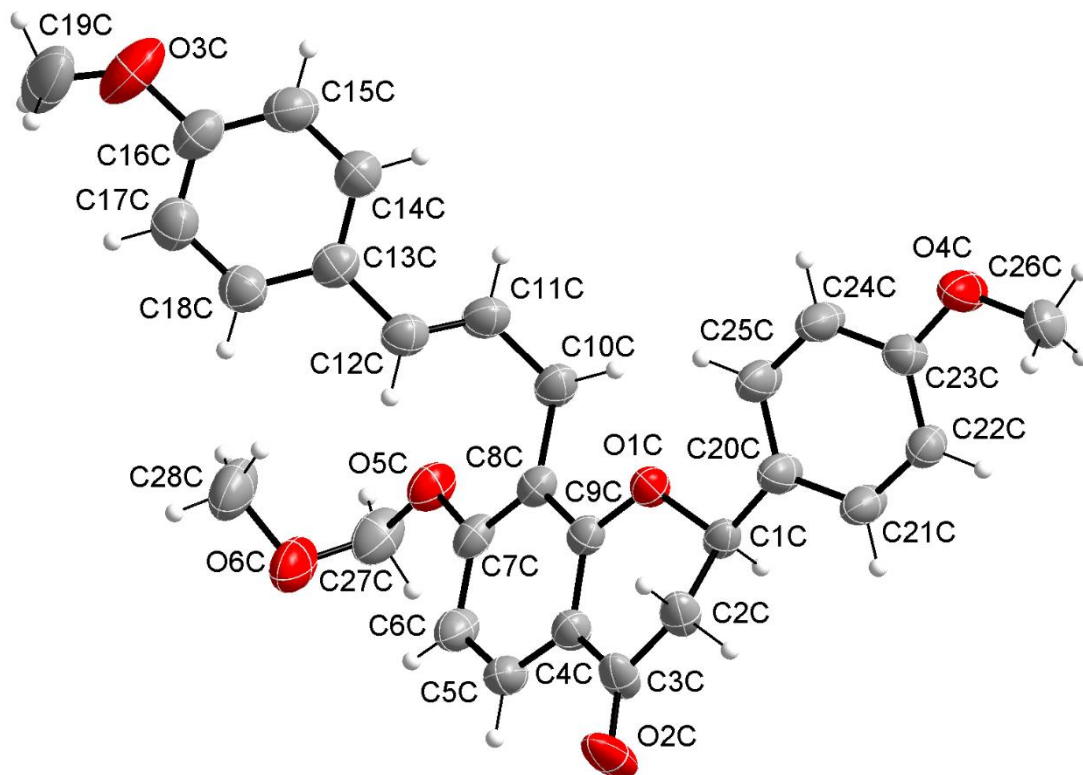

**Figure S4:** Molecular structure with atom labeling of the symmetry-independent molecule B in **16cf**. Displacement ellipsoids are shown at the 50% probability level.

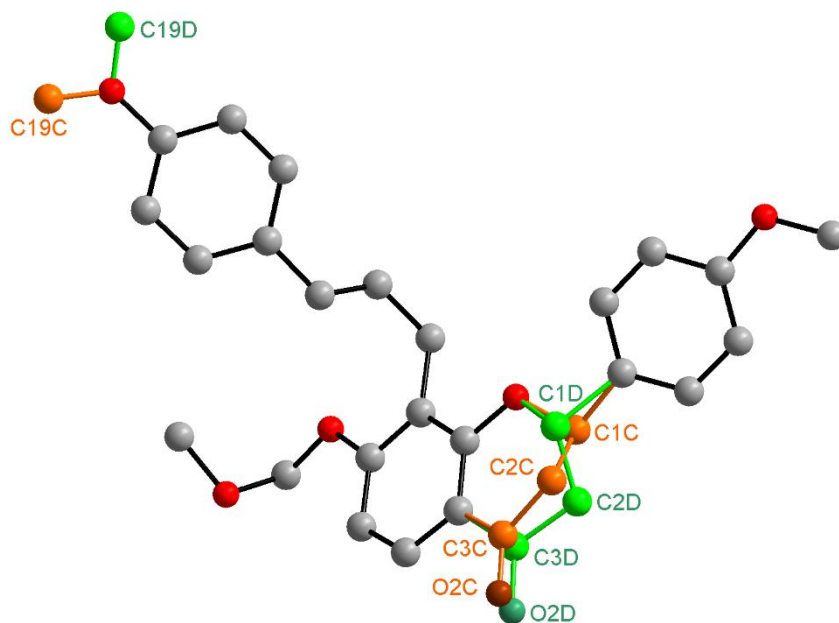

**Figure S5:** Disorder in the asymmetric molecule B in **16cf** with the main part shown in orange and the minor part shown in green color (hydrogens are omitted).

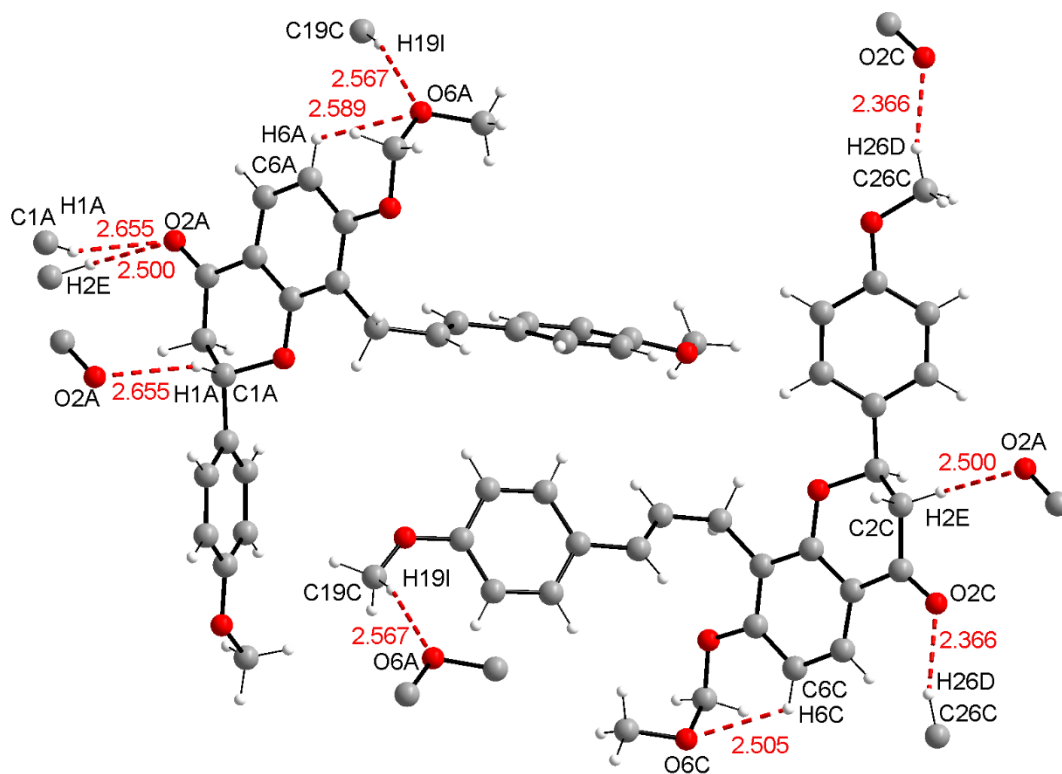

Figure S6: C-H...O hydrogen bonding (red dashed lines) in **16cf**.

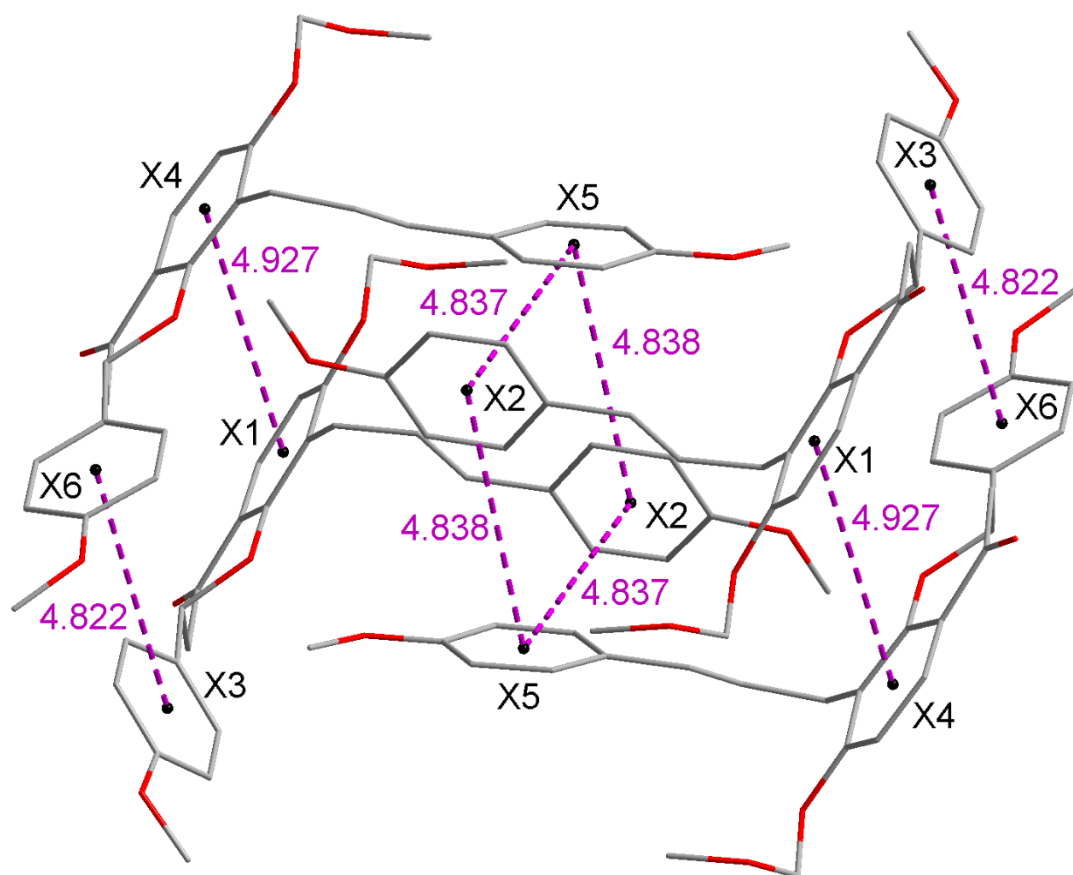

Figure S7: Stacking interactions (purple dotted lines) between the molecules in **16cf**. (X1, X2 and X3 mark the centers of the aromatics in molecule A, X4, X5 and X6 mark the centers in molecule B, hydrogens are omitted).

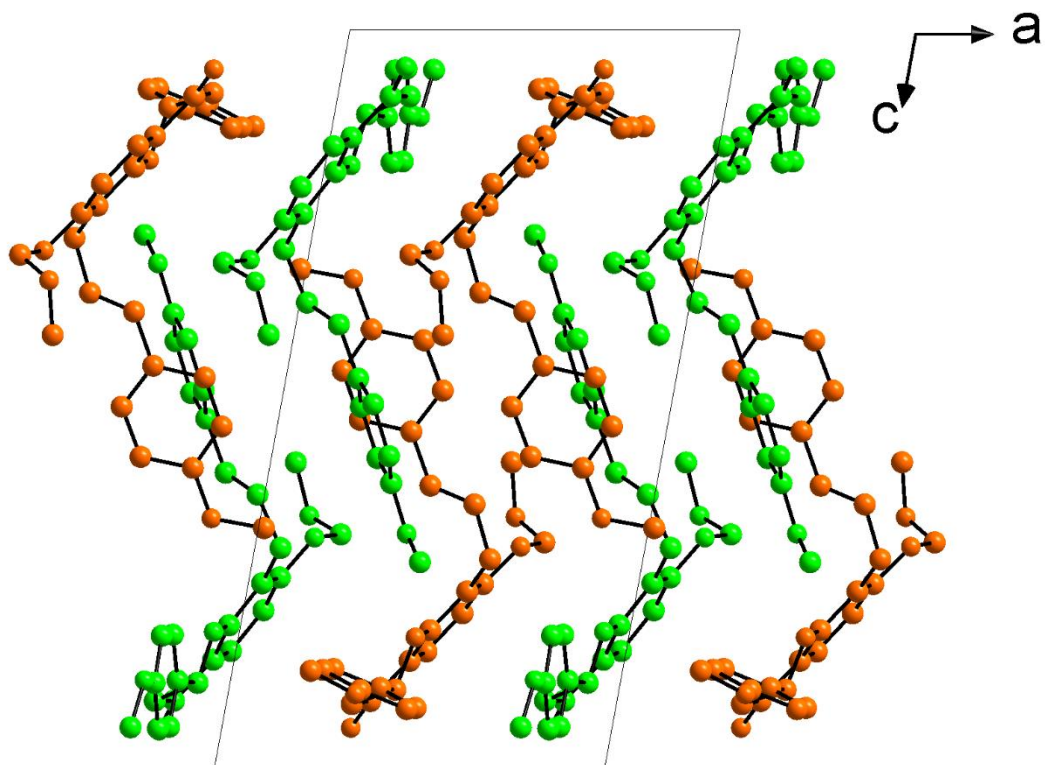

**Figure S8:** Cell view of **16cf** with the asymmetric molecule A colored in orange and the asymmetric molecule B colored in green looking along the crystallographic b axis (hydrogens are omitted).

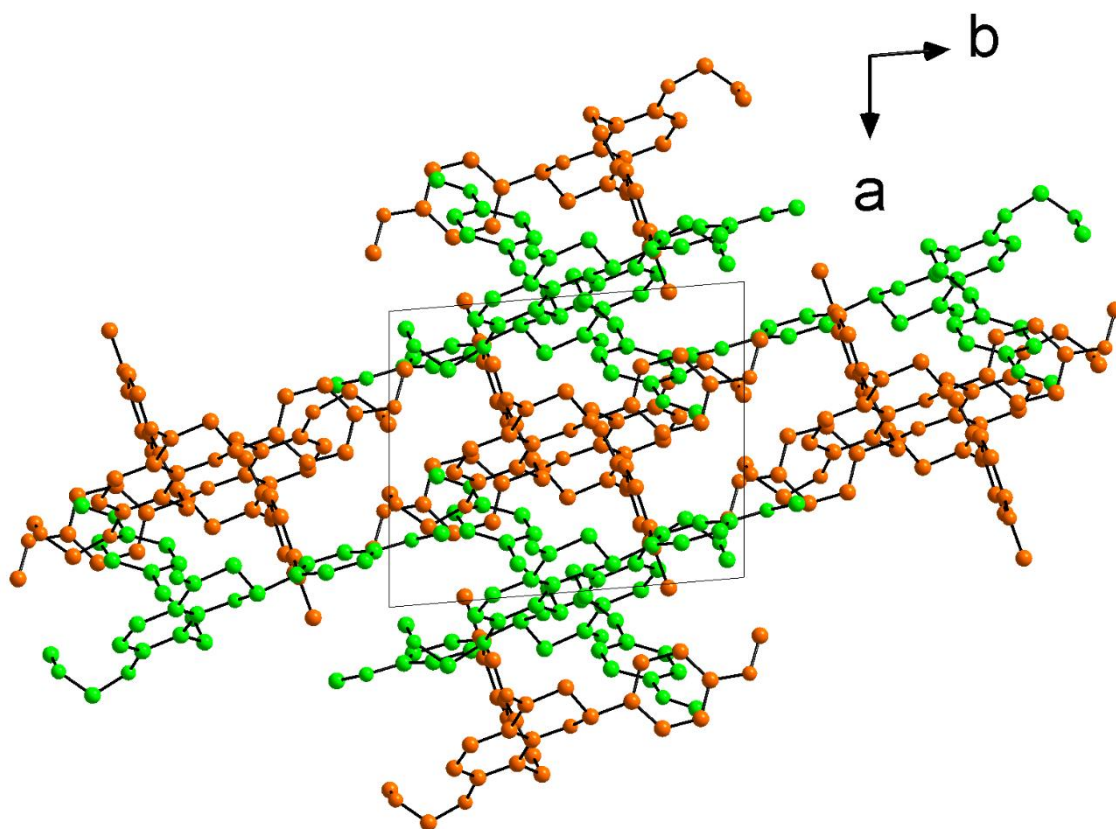

**Figure S9:** Cell view of **16cf** with the asymmetric molecule A colored in orange and the asymmetric molecule B colored in green looking along the crystallographic c axis (hydrogens are omitted).

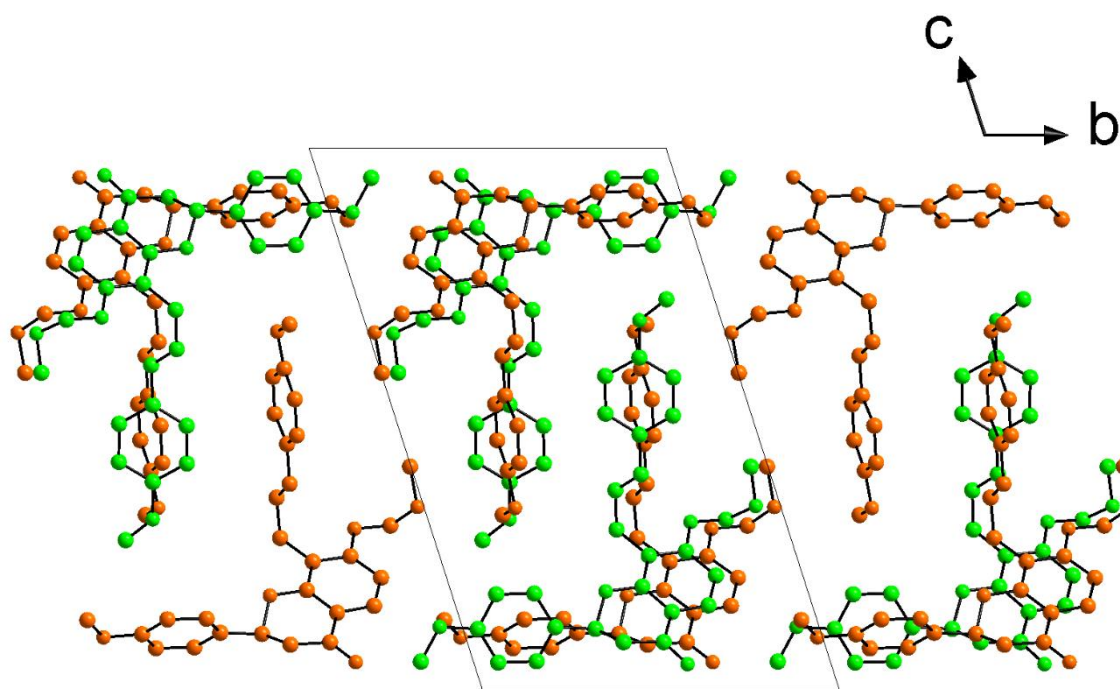

**Figure S10:** Cell view of **16cf** with the asymmetric molecule A colored in orange and the asymmetric molecule B colored in green looking along the crystallographic a axis (hydrogens are omitted).

## B Syntheses of compounds **11d** and **15b**

### 1 Synthesis of 5-(prop-2-en-1-yl)-1,2,3,4-tetrahydronaphthalene (**11d**)

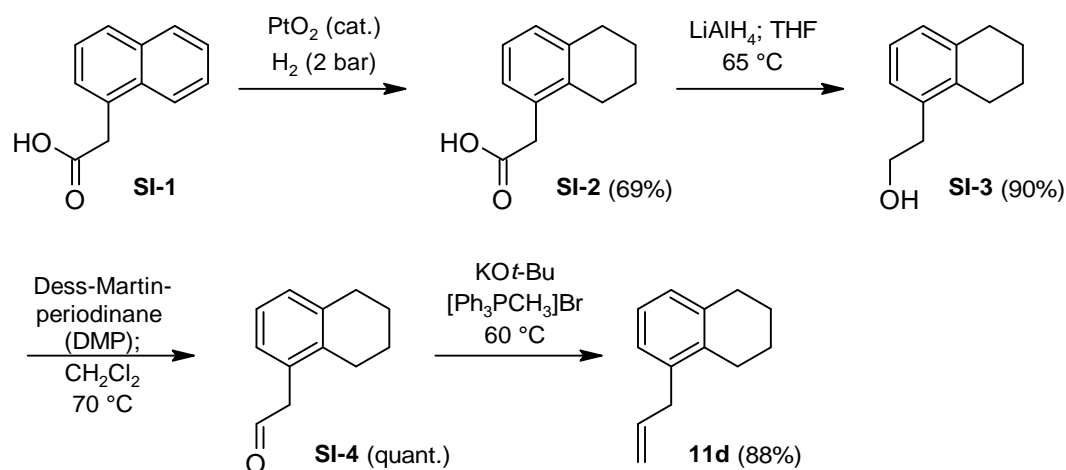

**Scheme S1** Synthesis of test substrate **11d**

**5,6,7,8-Tetrahydronaphthalen-1-ylacetic acid (SI-2).**<sup>6</sup> The title compound was synthesized according to a modified literature procedure:<sup>6</sup> to a solution of **SI-1** (1.86 g, 10.0 mmol) in ethyl acetate (15 mL) was added PtO<sub>2</sub> (180 mg, 0.8 mmol, 8 mol-%) and the solution was purged with hydrogen. The mixture was then stirred under an atmosphere of hydrogen (2 bar) for 3



days. The mixture was filtered through a short pad of celite, washed with ethyl acetate (10 mL), and the combined ethyl acetate solution was evaporated. The residue was recrystallized from hexane to give **SI-2** as colourless crystals; yield: 1.31 g (6.9 mmol, 69%); mp 128 – 130 °C; IR (ATR)  $\nu$  2941 (w), 1705 (s), 1406 (m), 1257 (m), 1210 (s), 780 (m)  $\text{cm}^{-1}$ ;  $^1\text{H}$  NMR (400 MHz,  $\text{CDCl}_3$ )  $\delta$  7.12-7.02 (m, 3H), 3.65 (s, 2H), 2.81 (t,  $J = 6.0$  Hz, 2H), 2.70 (t,  $J = 6.0$  Hz, 2H), 1.89-1.74 (m, 4H);  $^{13}\text{C}\{^1\text{H}\}$  NMR (100 MHz,  $\text{CDCl}_3$ )  $\delta$  178.4, 138.0, 136.0, 132.1, 129.0, 128.0, 125.6, 38.7, 30.2, 26.5, 23.4, 22.8; HRMS (EI)  $m/z$   $[\text{M}+\text{H}]^+$  calcd for  $\text{C}_{12}\text{H}_{15}\text{O}_2$  191.1067, found 191.1072.

**2-(5,6,7,8-Tetrahydronaphthalen-1-yl)ethanol (SI-3)**. Conditions adapted from a literature procedure:<sup>7</sup> under an atmosphere of dry nitrogen,  $\text{LiAlH}_4$  (0.19 g, 5.3 mmol) was suspended in dry THF (40 mL) and cooled to 0 °C. A solution of **SI-2** (1.00 g, 5.3 mmol) in dry THF (40 mL) was added dropwise, the mixture was warmed to ambient temperature and then heated at 65 °C for 24 h. It was then cooled to ambient temperature, poured onto ice-water mixture (35 mL), and the resulting precipitate was dissolved with aq.  $\text{H}_2\text{SO}_4$  (1 M). MTBE (25 mL) was added to the mixture, the organic layer was separated, and the aqueous layer was extracted with MTBE (3 times 10 mL). The combined organic extracts were dried with  $\text{MgSO}_4$ , filtered and evaporated. The product was sufficiently pure to be used in the next step without further purification; colourless oil; yield: 0.84 g (4.8 mmol, 90%); IR (ATR)  $\nu$  3327 (s, br.), 2927 (s), 2837 (m), 1587 (m), 1458 (m), 1436 (m), 1036 (s), 771 (s), 719 (s)  $\text{cm}^{-1}$ ;  $^1\text{H}$  NMR (400 MHz,  $\text{CDCl}_3$ )  $\delta$  7.11 (t,  $J = 7.5$  Hz, 1H), 7.04 (d,  $J = 7.5$  Hz, 1H), 7.01 (d,  $J = 7.5$  Hz), 3.85 (t,  $J = 7.0$  Hz, 2H), 2.89 (t,  $J = 7.0$  Hz, 2H), 2.83 (t,  $J = 6.2$  Hz, 2H), 2.78 (t,  $J = 6.2$  Hz, 2H), 2.37 (s(br.), 1H), 1.92-1.77 (m, 4H);  $^{13}\text{C}\{^1\text{H}\}$  NMR (100 MHz,  $\text{CDCl}_3$ )  $\delta$  137.7, 136.4, 135.6, 127.9, 127.0, 125.4, 62.6, 35.9, 30.2, 26.3, 23.5, 22.9; HRMS (EI)  $m/z$   $[\text{M}^+]$  calcd for  $\text{C}_{12}\text{H}_{16}\text{O}$  176.1196, found 176.1193.

**5,6,7,8-Tetrahydronaphthalen-1-ylacetaldehyde (SI-4)**. Conditions adapted from a literature procedure:<sup>8</sup> to a solution of **SI-3** (400 mg, 2.3 mmol) in  $\text{CH}_2\text{Cl}_2$  (19 mL) was added Dess-Martin-periodinane (DMP, 1060 mg, 2.5 mmol) in portions at ambient temperature. After stirring for two hours, another portion of DMP (530 mg, 1.3 mmol) was added and stirring was continued for 12 h. The mixture was diluted with diethylether (20 mL), and aq.  $\text{NaOH}$  (1 M, 20 mL) was added. The organic layer was separated, washed with aq.  $\text{NaOH}$  (1 M, 10 mL) followed by water (20 mL), and then dried with  $\text{MgSO}_4$ . It was filtered and evaporated to furnish crude **SI-4** (400 mg, 2.3 mmol, quant.). All attempts to purify aldehyde **SI-4** resulted in decomposition; therefore, **SI-4** was used in the following reaction without further purification;  $^1\text{H}$  NMR (400 MHz,  $\text{CDCl}_3$ )  $\delta$  9.72 (t,  $J = 2.3$  Hz, 1H), 7.15 (t,  $J = 7.5$  Hz, 1H), 7.09 (d,  $J = 7.5$

Hz, 1H), 7.04 (d,  $J = 7.5$  Hz, 1H), 3.69 (d,  $J = 2.3$  Hz, 2H), 2.84 (t,  $J = 6.2$  Hz, 2H), 2.64 (t,  $J = 6.2$  Hz, 2H), 1.94-1.72 (m, 4H);  $^{13}\text{C}\{^1\text{H}\}$  NMR (100 MHz,  $\text{CDCl}_3$ ):  $\delta = 199.7, 138.2, 136.1, 130.7, 129.0, 128.1, 125.8, 48.4, 30.1, 26.8, 23.3, 22.7$ .

**5-(Prop-2-en-1-yl)-1,2,3,4-tetrahydronaphthalene (11d)**. Conditions adapted from a literature procedure:<sup>9</sup> a solution of methyltriphenylphosphonium bromide (986 mg, 2.8 mmol) in THF (7 mL) was cooled to 0 °C. A solution of BuLi in hexane (2.5 M, 1.01 mL, 2.5 mmol) was slowly added, and the mixture was warmed to ambient temperature and stirred for 0.5 h. The mixture was cooled to 0 °C, a solution of **SI-4** (400 mg, 2.3 mmol) in THF (2.5 mL) was slowly added, and it was warmed to ambient temperature and stirred at ambient temperature for 2 h. The reaction was quenched by addition of methanol (10 mL), and all volatiles were removed in vacuo. The residue was extracted with pentane (three times, 10 mL each), filtered, and evaporated. The residue was purified by column chromatography on silica, using hexanes as eluent; colourless liquid; yield: 350 mg (2.0 mmol, 88%); IR (ATR): 2926 (s), 1637 (m), 1586 (w), 1458 (s), 1436 (s), 993 (s), 909 (s), 772 (s), 728 (s)  $\text{cm}^{-1}$ ;  $^1\text{H}$  NMR (400 MHz,  $\text{CDCl}_3$ )  $\delta$  7.10 (t,  $J = 7.5$  Hz, 1H), 7.05-6.98 (m, 2H), 5.99 (ddt,  $J = 16.9, 10.1, 6.5$  Hz, 1H), 5.10 (dq,  $J = 10.1, 1.6$  Hz, 1H), 5.05 (dq,  $J = 16.9, 1.7$  Hz, 1H), 3.77 (dm,  $J = 6.5$  Hz, 2H), 2.83 (t,  $J = 6.3$  Hz, 1H), 2.73 (t,  $J = 6.3$  Hz, 1H), 1.91-1.76 (m, 4H);  $^{13}\text{C}\{^1\text{H}\}$  NMR (100 MHz,  $\text{CDCl}_3$ )  $\delta$  138.3, 137.5, 136.9, 135.4, 127.6, 126.6, 125.4, 115.7, 37.4, 30.3, 26.2, 23.5, 23.0. No matching HRMS data could be obtained using either EI or ESI.

**Figure S11:**  $^1\text{H}$  NMR (400 MHz,  $\text{CDCl}_3$ ) of **SI-2**

NEO400\_2024-0514\_mak.10.fid  
716\_3

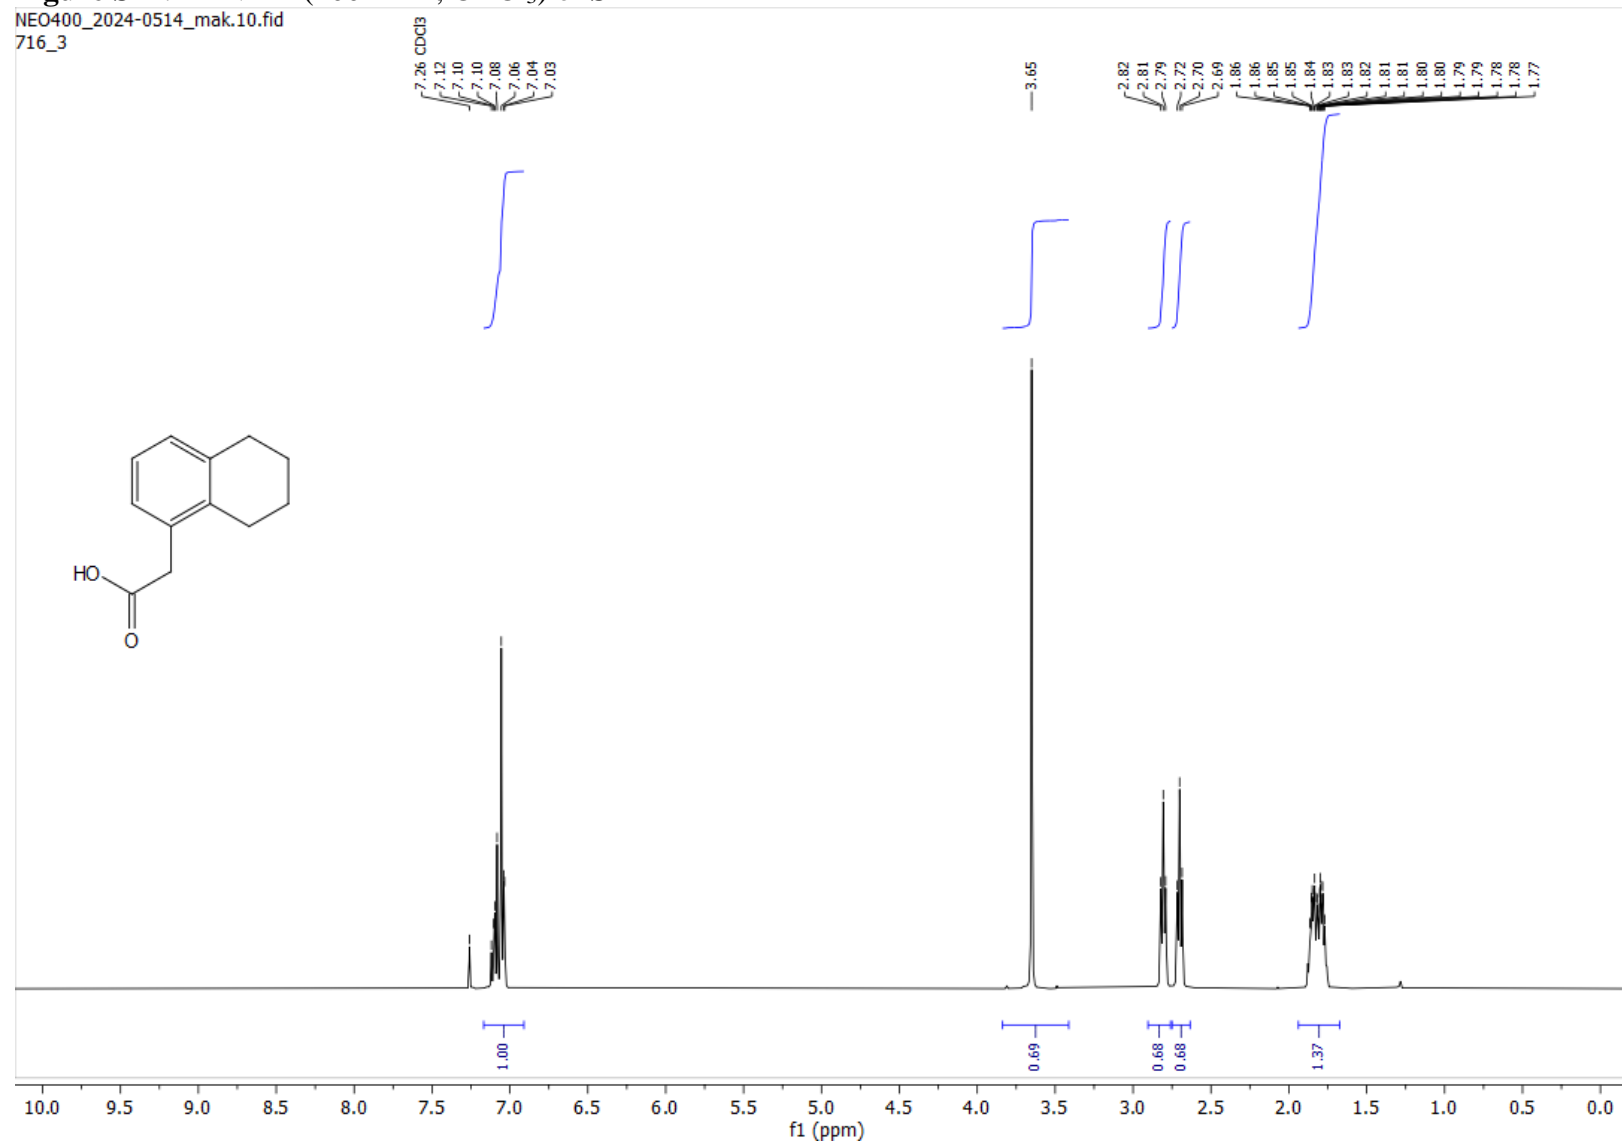

**Figure S12:**  $^{13}\text{C}\{^1\text{H}\}$  NMR (100 MHz,  $\text{CDCl}_3$ ) of **SI-2**

NEO400\_2024-0514\_mak.11.fid  
716\_3

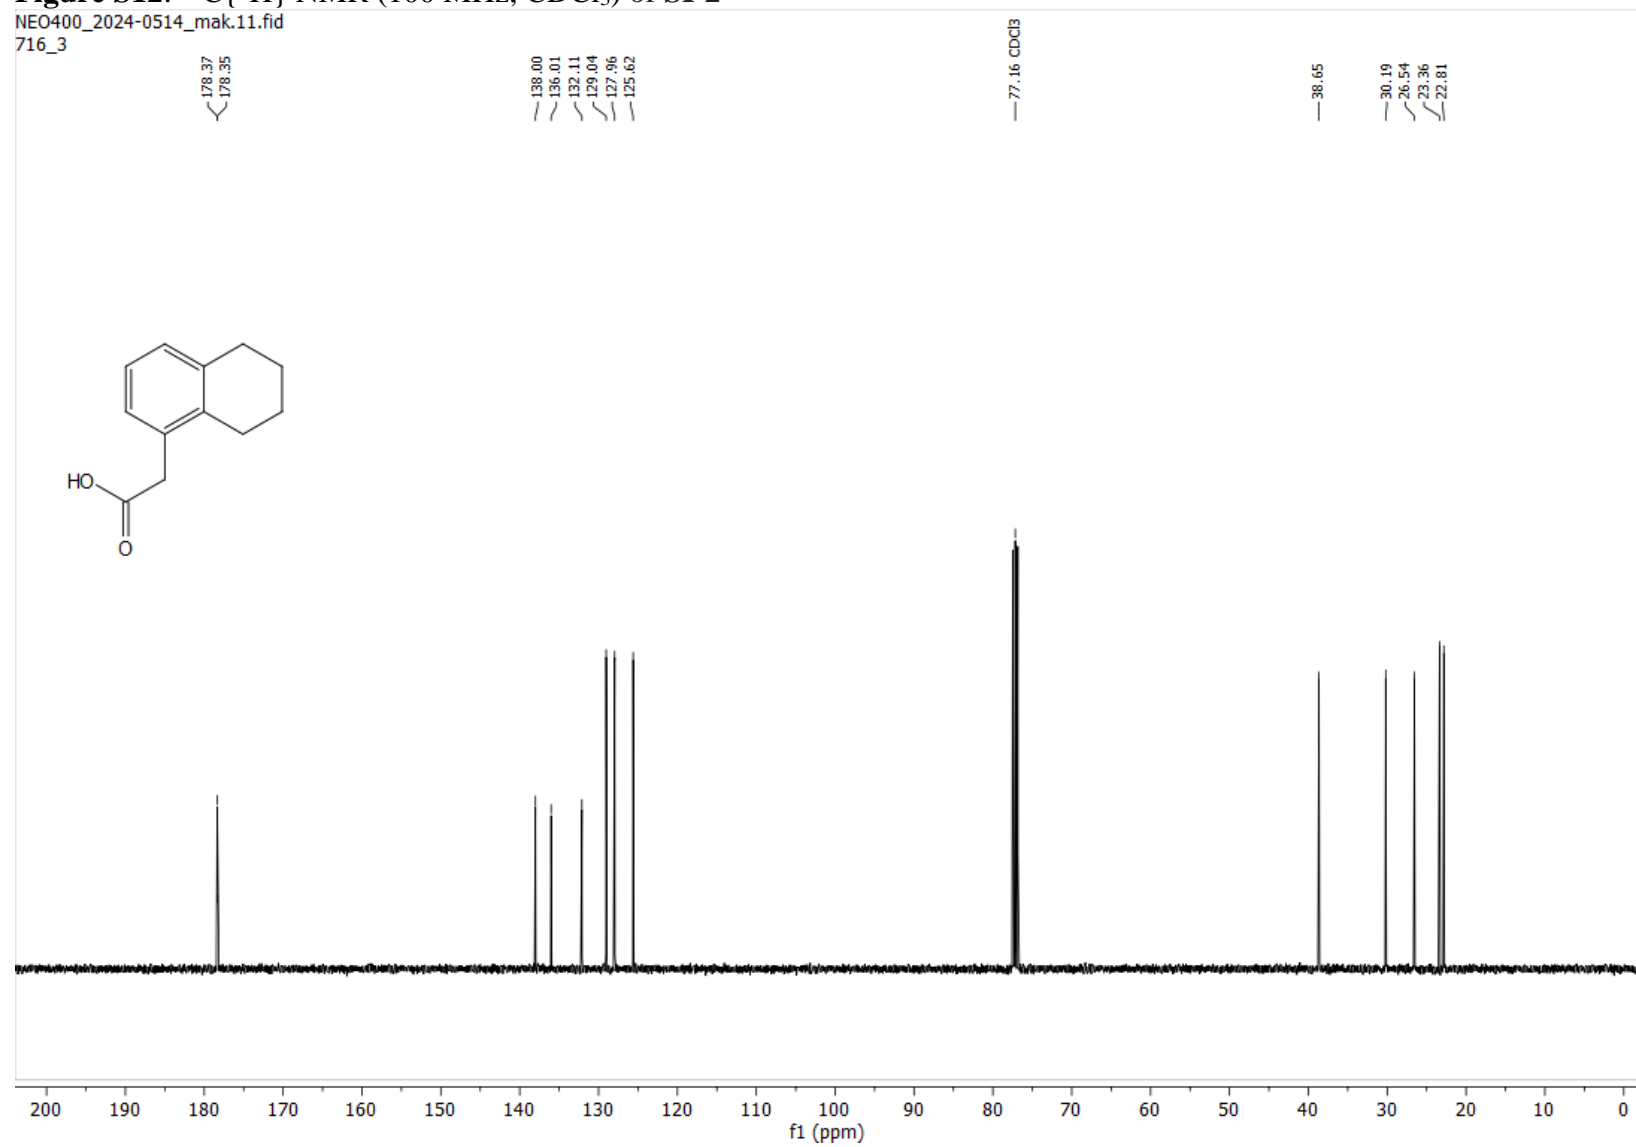

**Figure S13:**  $^1\text{H}$  NMR (400 MHz,  $\text{CDCl}_3$ ) of **SI-3**

NEO400\_2024-0517\_mak.20.fid  
717roh

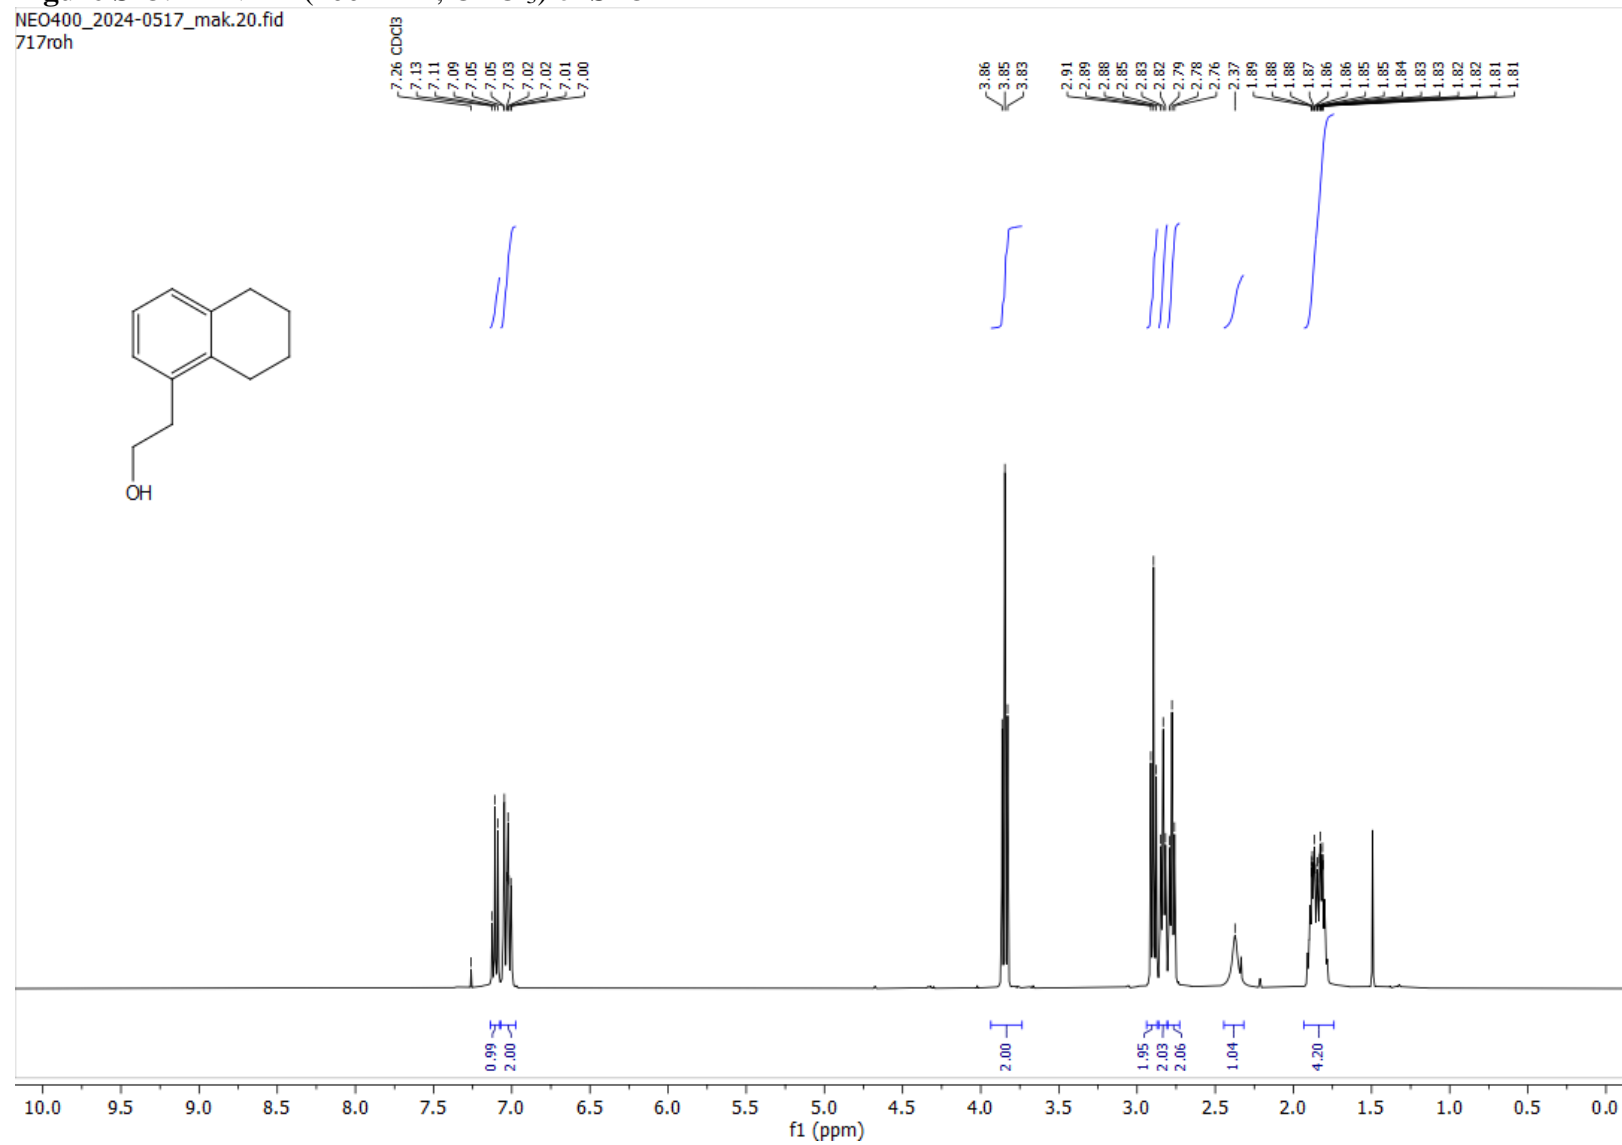

**Figure S14:**  $^{13}\text{C}\{^1\text{H}\}$  NMR (100 MHz,  $\text{CDCl}_3$ ) of **SI-3**

NEO400\_2024-0517\_mak.21.fid  
717roh

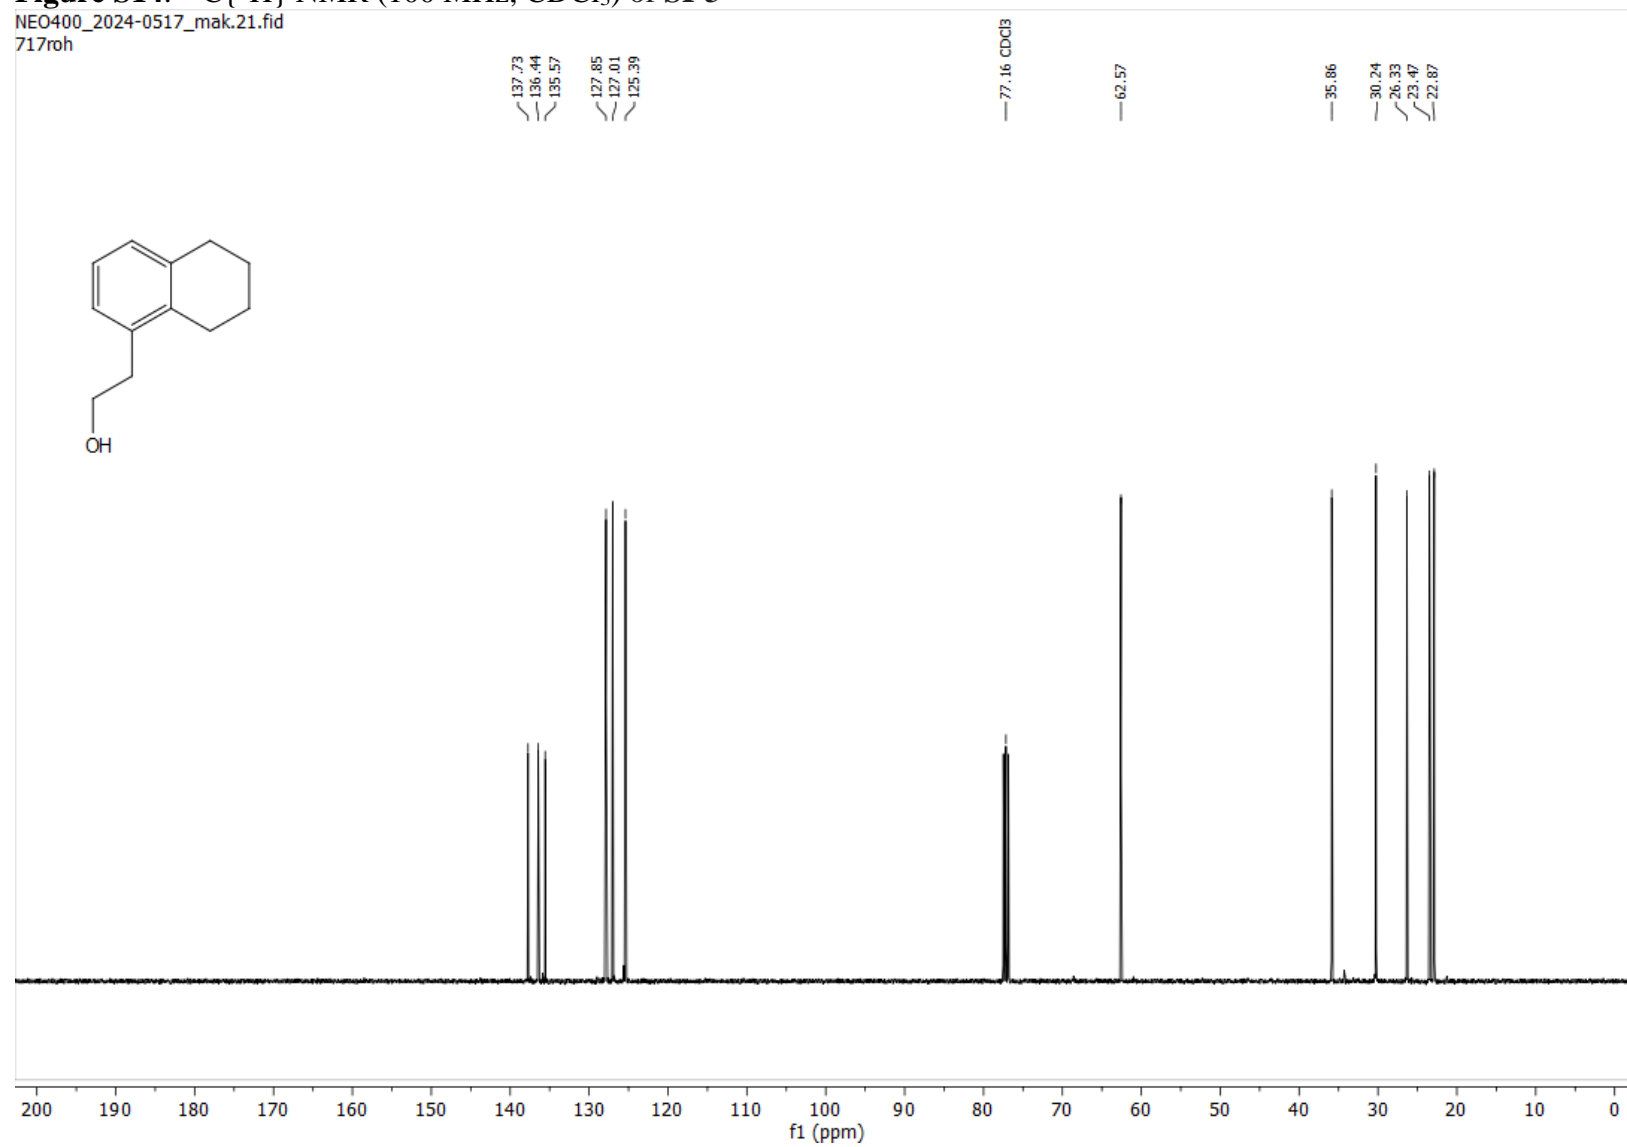

**Figure S15:**  $^1\text{H}$  NMR (400 MHz,  $\text{CDCl}_3$ ) of **SI-4** (crude reaction mixture, due to decomposition upon purification attempts)

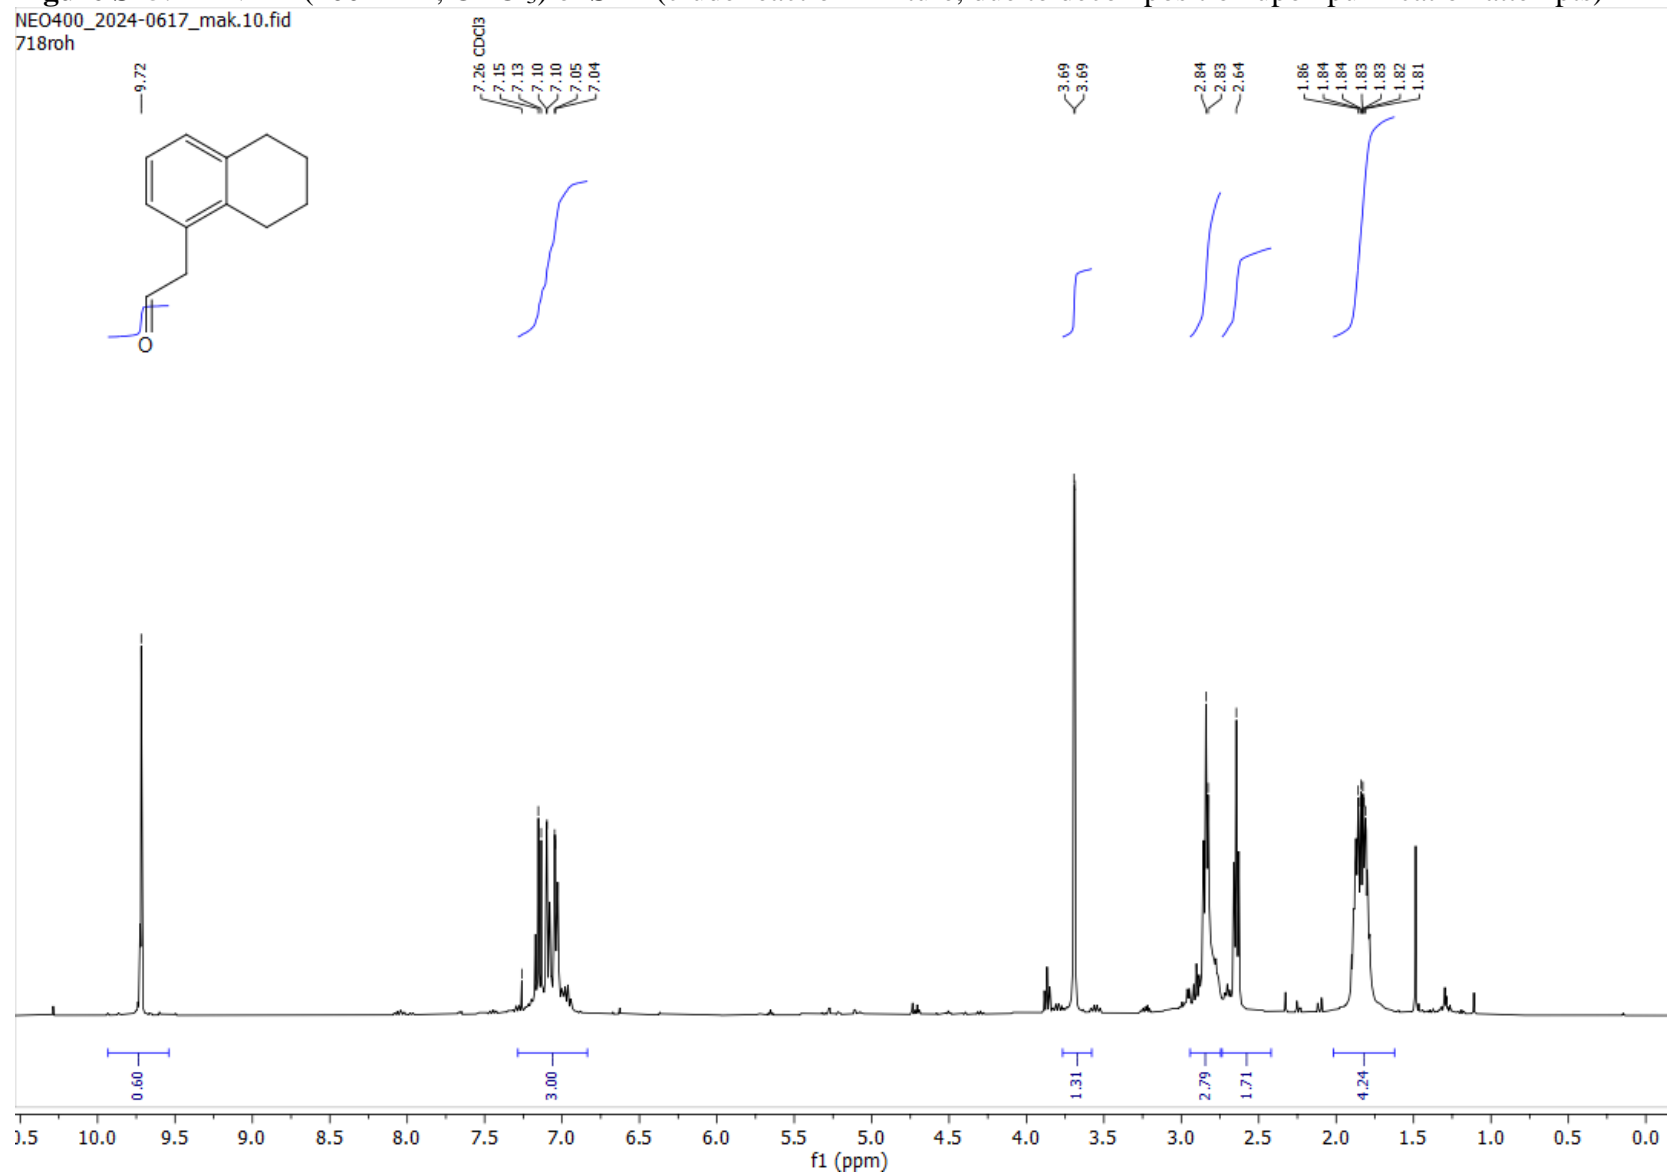

**Figure S16:**  $^{13}\text{C}\{^1\text{H}\}$  NMR (100 MHz,  $\text{CDCl}_3$ ) of **SI-4** (crude reaction mixture, due to decomposition upon purification attempts)

NEO400\_2024-0617\_mak.11.fid  
718roh

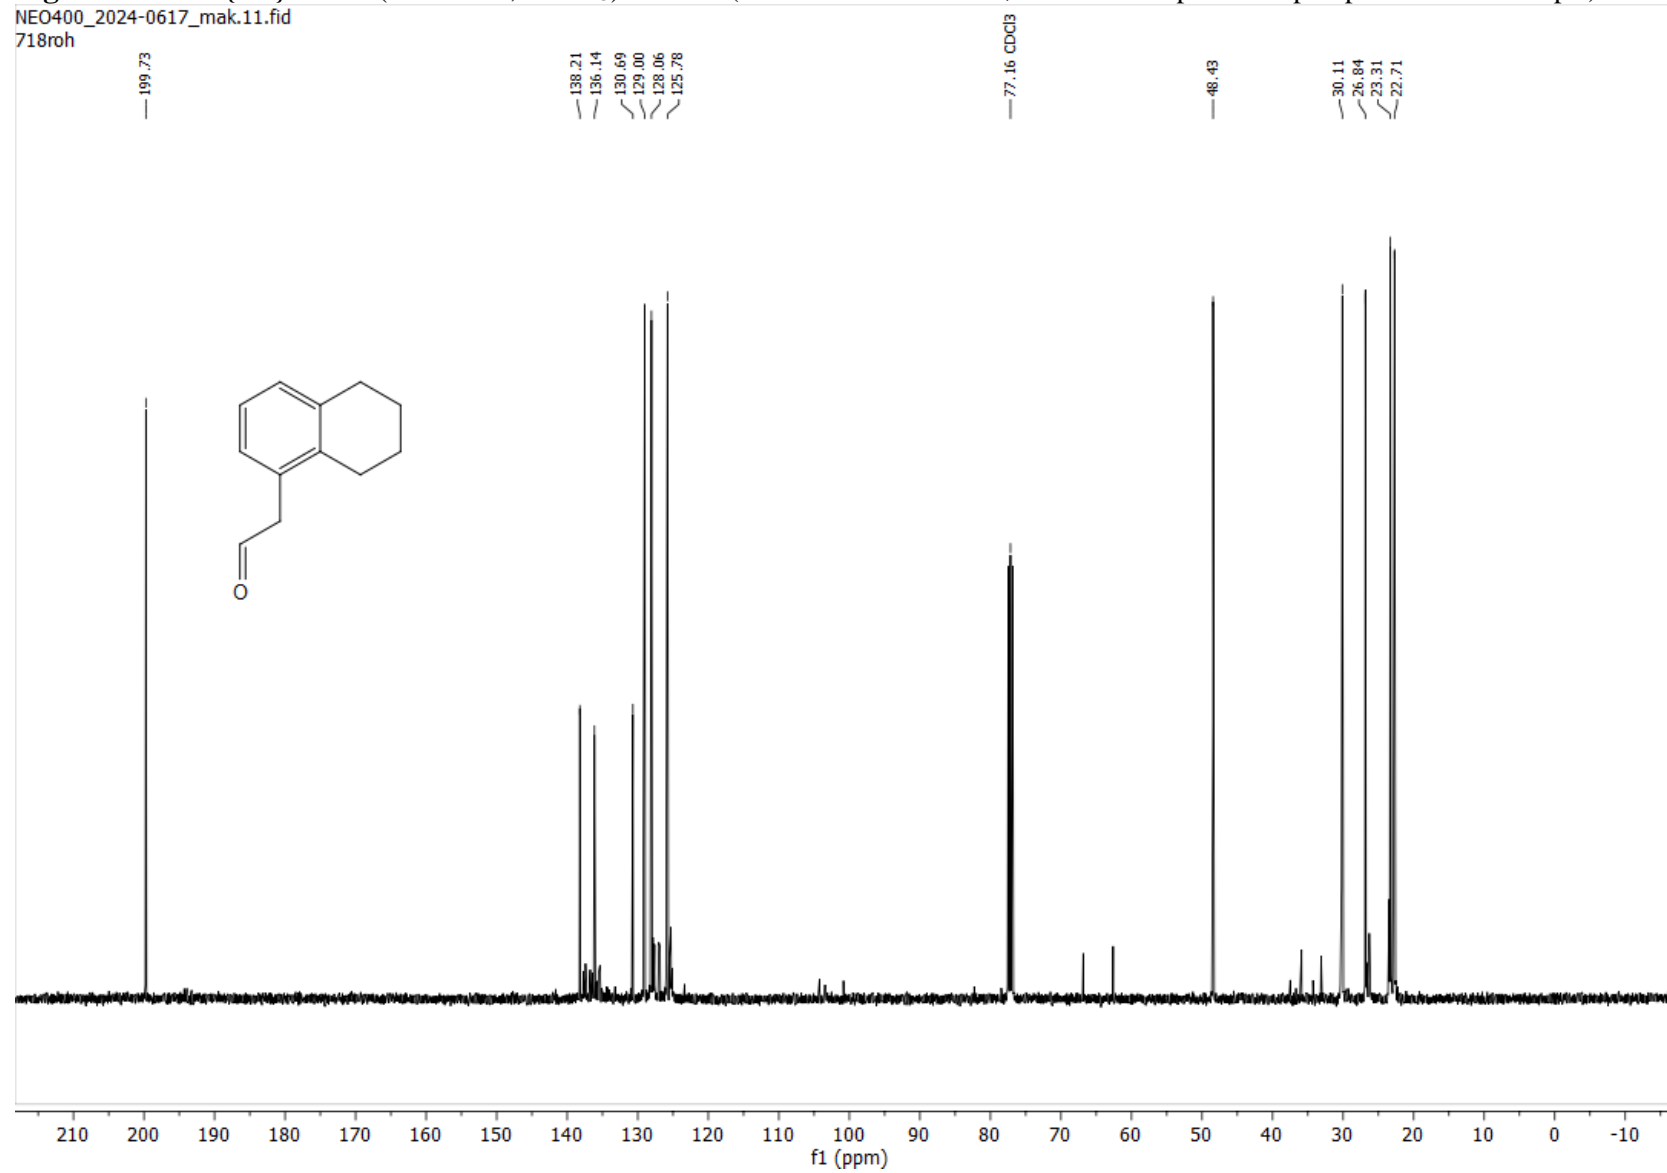



**Figure S17:**  $^1\text{H}$  NMR (400 MHz,  $\text{CDCl}_3$ ) of **11d**

NEO400\_2024-0905\_mak.10.fid  
719sf1

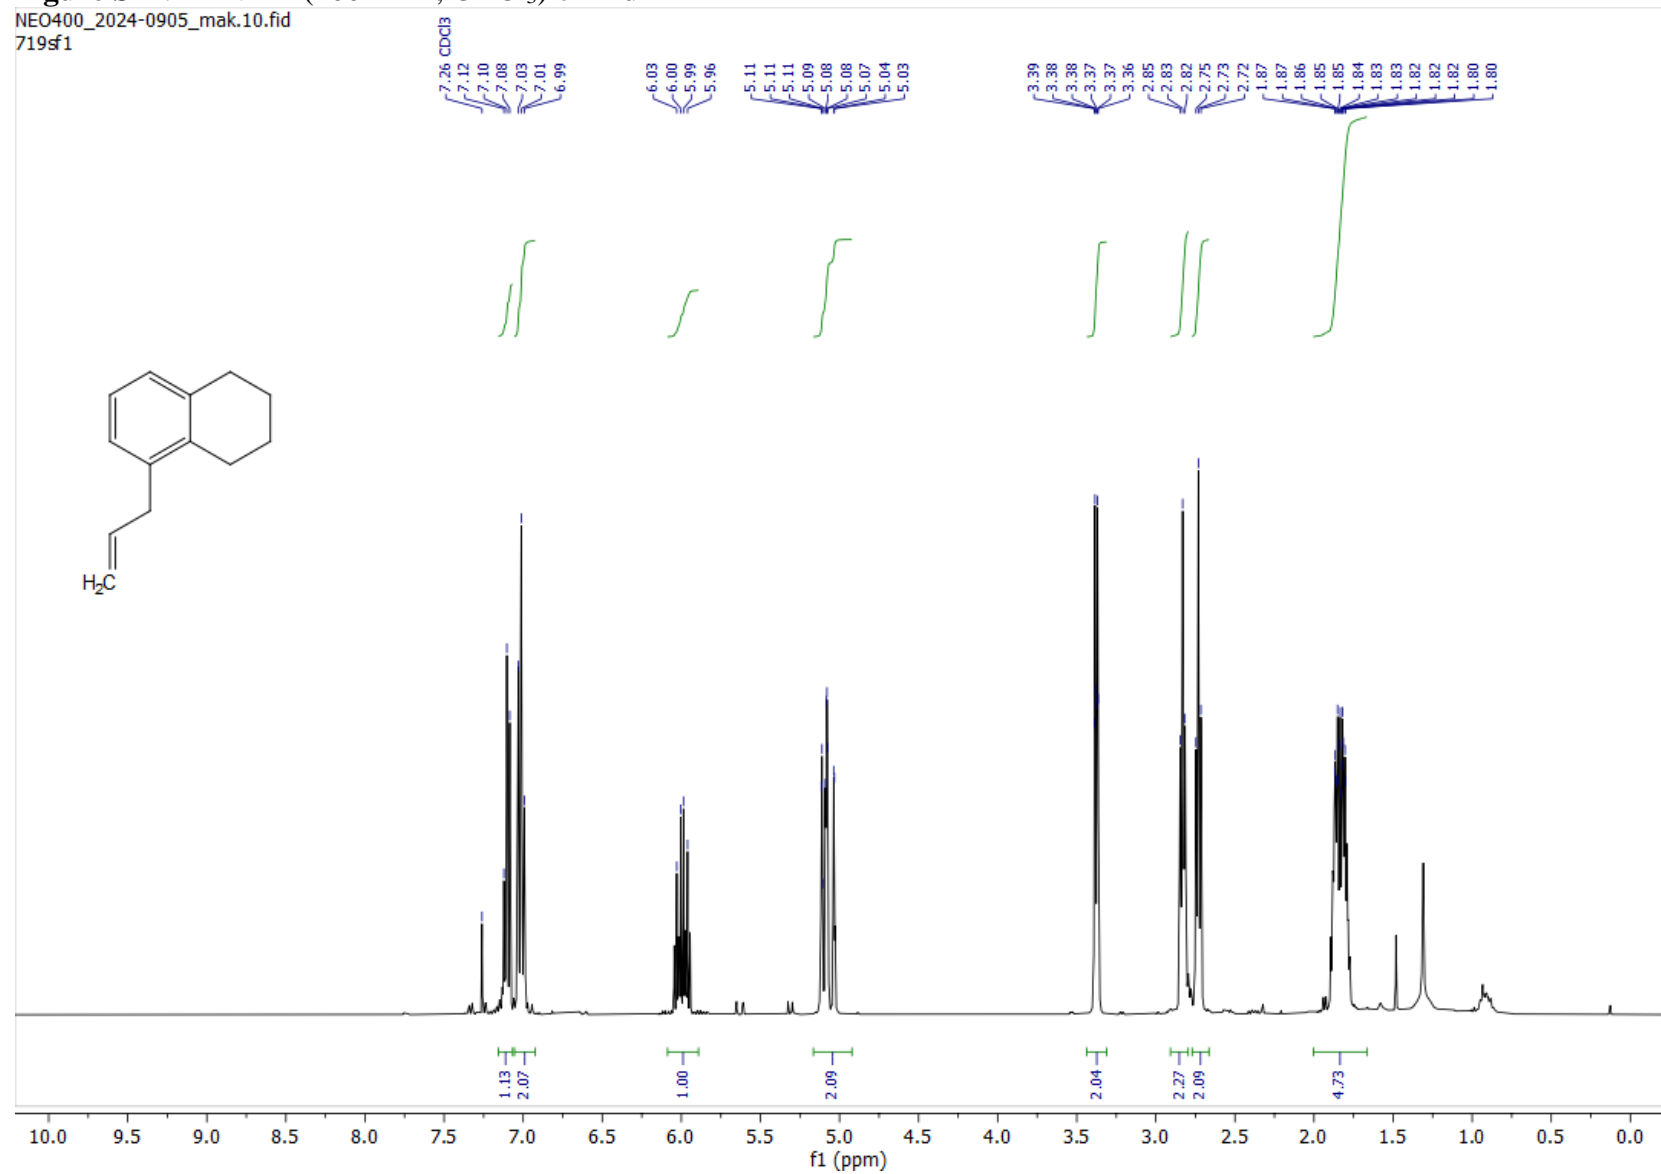

**Figure S18:**  $^{13}\text{C}\{^1\text{H}\}$  NMR (100 MHz,  $\text{CDCl}_3$ ) of **11d**

NEO400\_2024-0905\_mak.11.fid  
719sf1

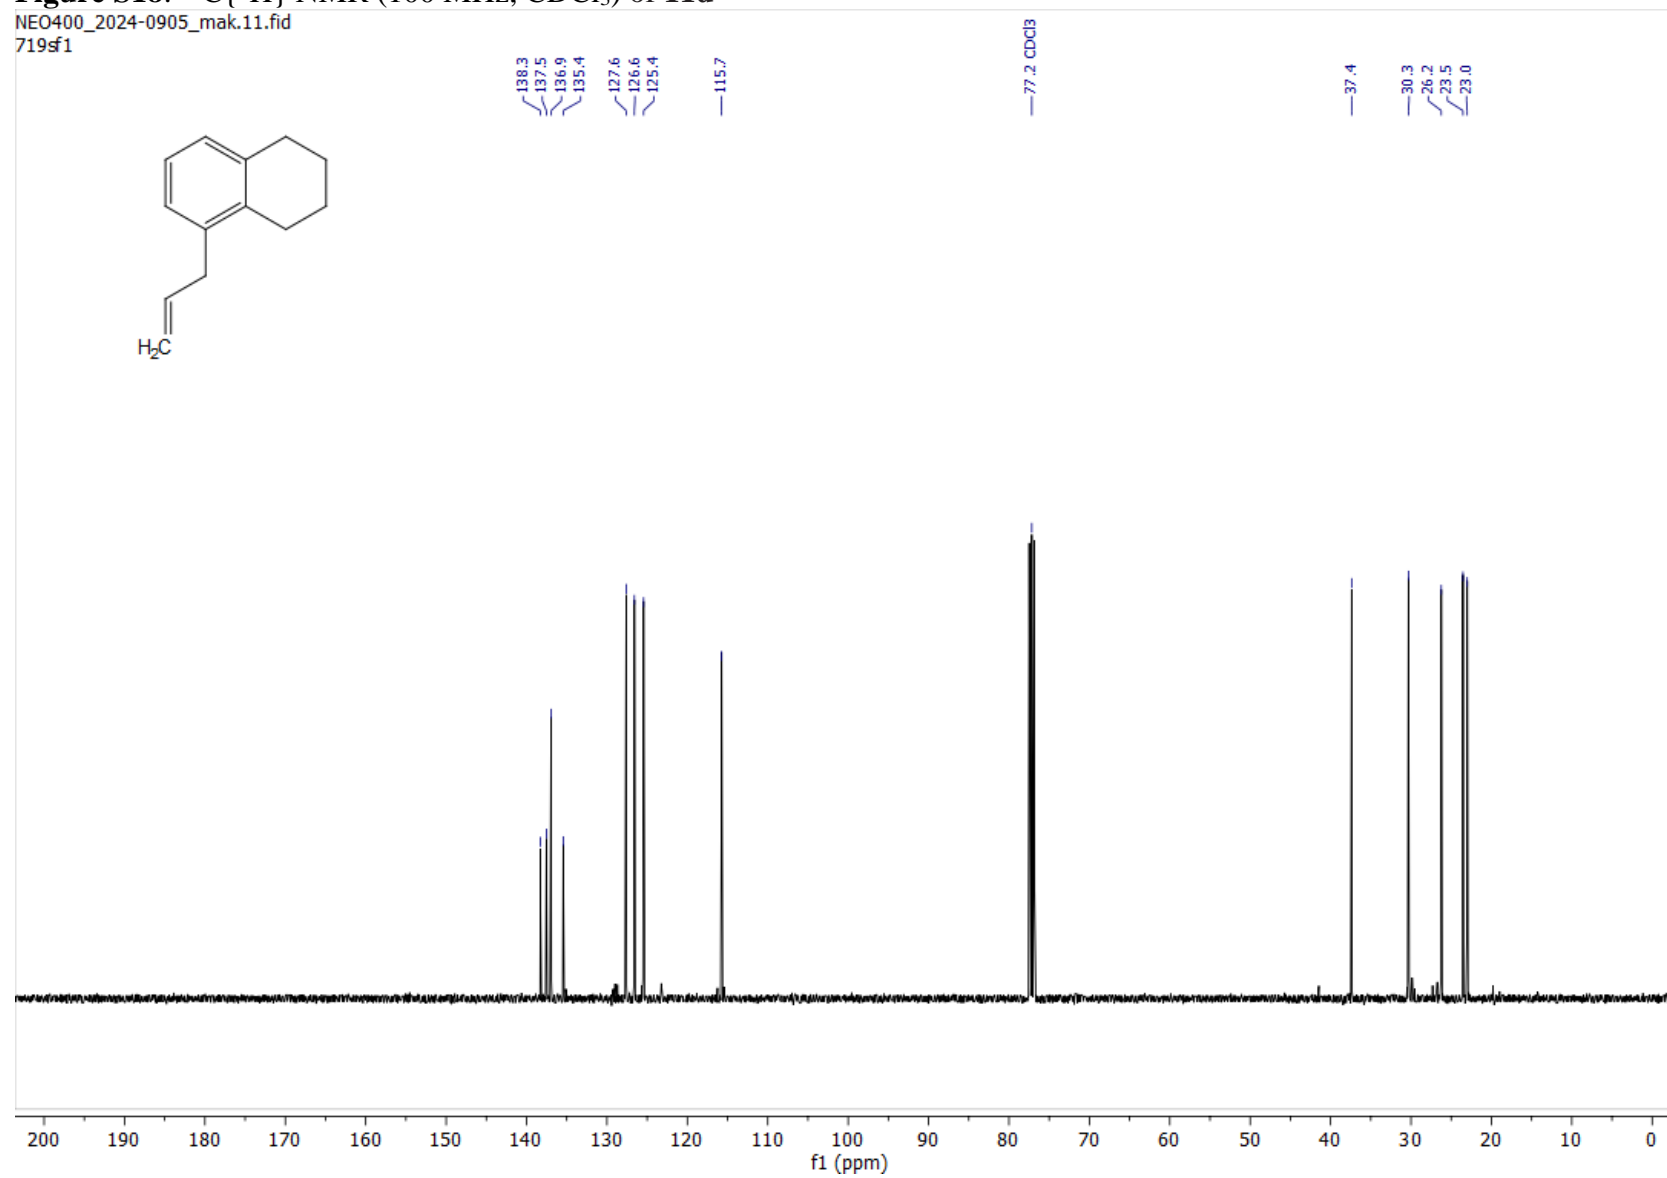

2 **Synthesis of 7-methoxy-2-[4-(methoxymethoxy)phenyl]-8-(prop-2-en-1-yl)-2,3-dihydro-4H-chromen-4-one (15b)**

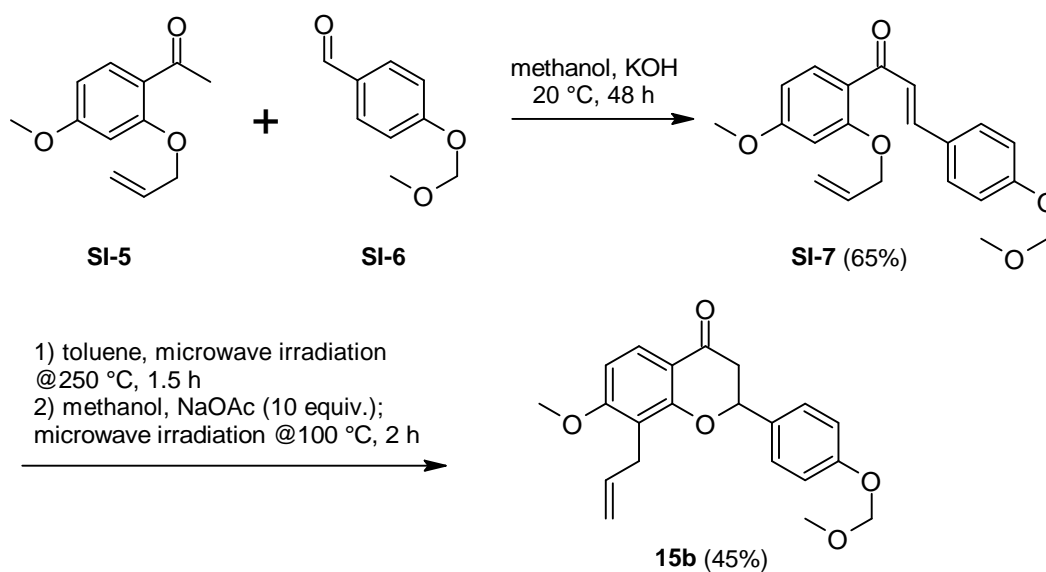

**Scheme S2** Synthesis of allylflavanone **15b**

**(2E)-3-[4-(Methoxymethoxy)phenyl]-1-[4-methoxy-2-(prop-2-en-1-yloxy)phenyl]prop-2-en-1-one (SI-7)**. A solution of KOH in methanol (60 wt %, 40 mL) was added dropwise to a well stirred solution of acetophenone **SI-5** (2.06 g, 10.0 mmol) and 4-OMOM-substituted benzaldehyde **SI-6** (1.66 g, 10.0 mmol) in methanol (20 mL) at 20 °C. The reaction mixture was stirred at 20 °C for 48 h. It was then poured into ice water (100 mL) and neutralized with aqueous HCl (4 M). The aqueous solution was extracted with EtOAc (three times 60 mL). The combined organic extracts were washed with brine, dried with anhydrous MgSO<sub>4</sub>, and filtered. The solvent was evaporated under reduced pressure, and the residue was purified by column chromatography on silica using hexane – EtOAc mixture (5:1 (v/v)) as eluent to afford **SI-7** as a pale yellow solid; yield: 2.30 g (6.5 mmol, 65%); mp 81 – 83 °C; IR (ATR)  $\nu$  2903 (w), 1649 (m), 1584 (s), 1244 (m), 1149 (s) cm<sup>-1</sup>; <sup>1</sup>H NMR (400 MHz, CDCl<sub>3</sub>)  $\delta$  7.77 (d, *J* = 8.6 Hz, 1H), 7.66 (d, *J* = 15.7 Hz, 1H), 7.53 (d, *J* = 8.6 Hz, 2H), 7.50 (d, *J* = 15.7 Hz, 1H), 7.04 (d, *J* = 8.6 Hz, 2H), 6.57 (dd, *J* = 8.6, 2.3 Hz, 1H), 6.48 (d, *J* = 2.3 Hz, 1H), 6.06 (ddt, *J* = 17.2, 10.6, 5.1 Hz, 1H), 5.45 (dm, *J* = 17.2 Hz, 1H), 5.28 (dm, *J* = 10.6 Hz, 1H), 5.21 (s, 2H), 4.62 (dt, *J* = 5.1, 1.6 Hz, 2H), 3.86 (s, 3H), 3.49 (s, 3H); <sup>13</sup>C{<sup>1</sup>H} NMR (100 MHz, CDCl<sub>3</sub>)  $\delta$  190.7, 164.1, 159.4, 158.9, 141.7, 133.1, 132.6, 130.0, 129.4, 125.7, 122.8, 118.1, 116.5, 105.7, 99.9, 94.4, 69.5, 56.3, 55.7; HRMS (EI) *m/z* [*M*<sup>+</sup>] calcd for C<sub>21</sub>H<sub>22</sub>O<sub>5</sub> 354.1467, found 354.1472.

**7-Methoxy-2-[4-(methoxymethoxy)phenyl]-8-(prop-2-en-1-yl)-2,3-dihydro-4H-chromen-4-one (15b)**. A solution of the **SI-7** (710 mg, 2.0 mmol) in toluene (10 mL) was placed in a

vessel suited for microwave irradiation. The vessel was sealed and irradiated in a microwave reactor at 250 °C for 1.5 h. The solvent was evaporated, and the residue was redissolved in methanol (20 mL) in a vessel suited for microwave irradiation. NaOAc (1.68 g, 20.00 mmol) was added to the solution, the vessel was sealed again, and the mixture was further irradiated in a microwave reactor at 100 °C for 2 h. The solvent was then evaporated, and water (50 mL) was added to the residue. The mixture was extracted with EtOAc (three times 30 mL). The combined organic extracts were washed with brine, dried with anhydrous MgSO<sub>4</sub>, and filtered. The solvent was evaporated under reduced pressure and the residue was purified by column chromatography on silica using hexanes – MTBE mixture (4:1 (v/v)) to afford the **15b** as a pale yellow solid; yield: 320 mg (0.90 mmol, 45%); mp 87 – 89 °C; IR (ATR)  $\nu$  2901 (w), 2884 (w), 1667 (s), 1601 (s), 1234 (m), 1022 (s) cm<sup>-1</sup>; <sup>1</sup>H NMR (400 MHz, CDCl<sub>3</sub>)  $\delta$  7.85 (d, *J* = 8.8 Hz, 1H), 7.39 (d, *J* = 8.7 Hz, 2H), 7.08 (d, *J* = 8.7 Hz, 2H), 6.63 (d, *J* = 8.8 Hz, 1H), 5.91 (ddt, *J* = 17.1, 10.0, 6.3 Hz, 1H), 5.39 (dd, *J* = 12.8, 3.0 Hz, 1H), 5.18 (s, 2H), 4.98 (dm, *J* = 17.1 Hz, 1H), 4.94 (dm, *J* = 10.0 Hz, 1H), 3.87 (s, 3H), 3.47 (s, 3H), 3.41 (d, *J* = 6.3 Hz, 2H), 2.97 (dd, *J* = 16.8, 12.8 Hz, 1H), 2.82 (dd, *J* = 16.8, 3.0 Hz, 1H); <sup>13</sup>C{<sup>1</sup>H} NMR (100 MHz, CDCl<sub>3</sub>)  $\delta$  191.5, 163.3, 160.3, 157.3, 135.8, 132.6, 127.3, 126.7, 116.3, 115.9, 115.3, 114.7, 104.9, 94.3, 79.0, 56.0, 55.9, 44.2, 27.1; HRMS (EI) *m/z* [M<sup>+</sup>] calcd for C<sub>21</sub>H<sub>22</sub>O<sub>5</sub> 354.1467, found 354.1481.

**Figure S19:**  $^1\text{H}$  NMR (400 MHz,  $\text{CDCl}_3$ ) of **SI-7**

NEO400\_2021-0526\_af0.10.fid  
AF 445

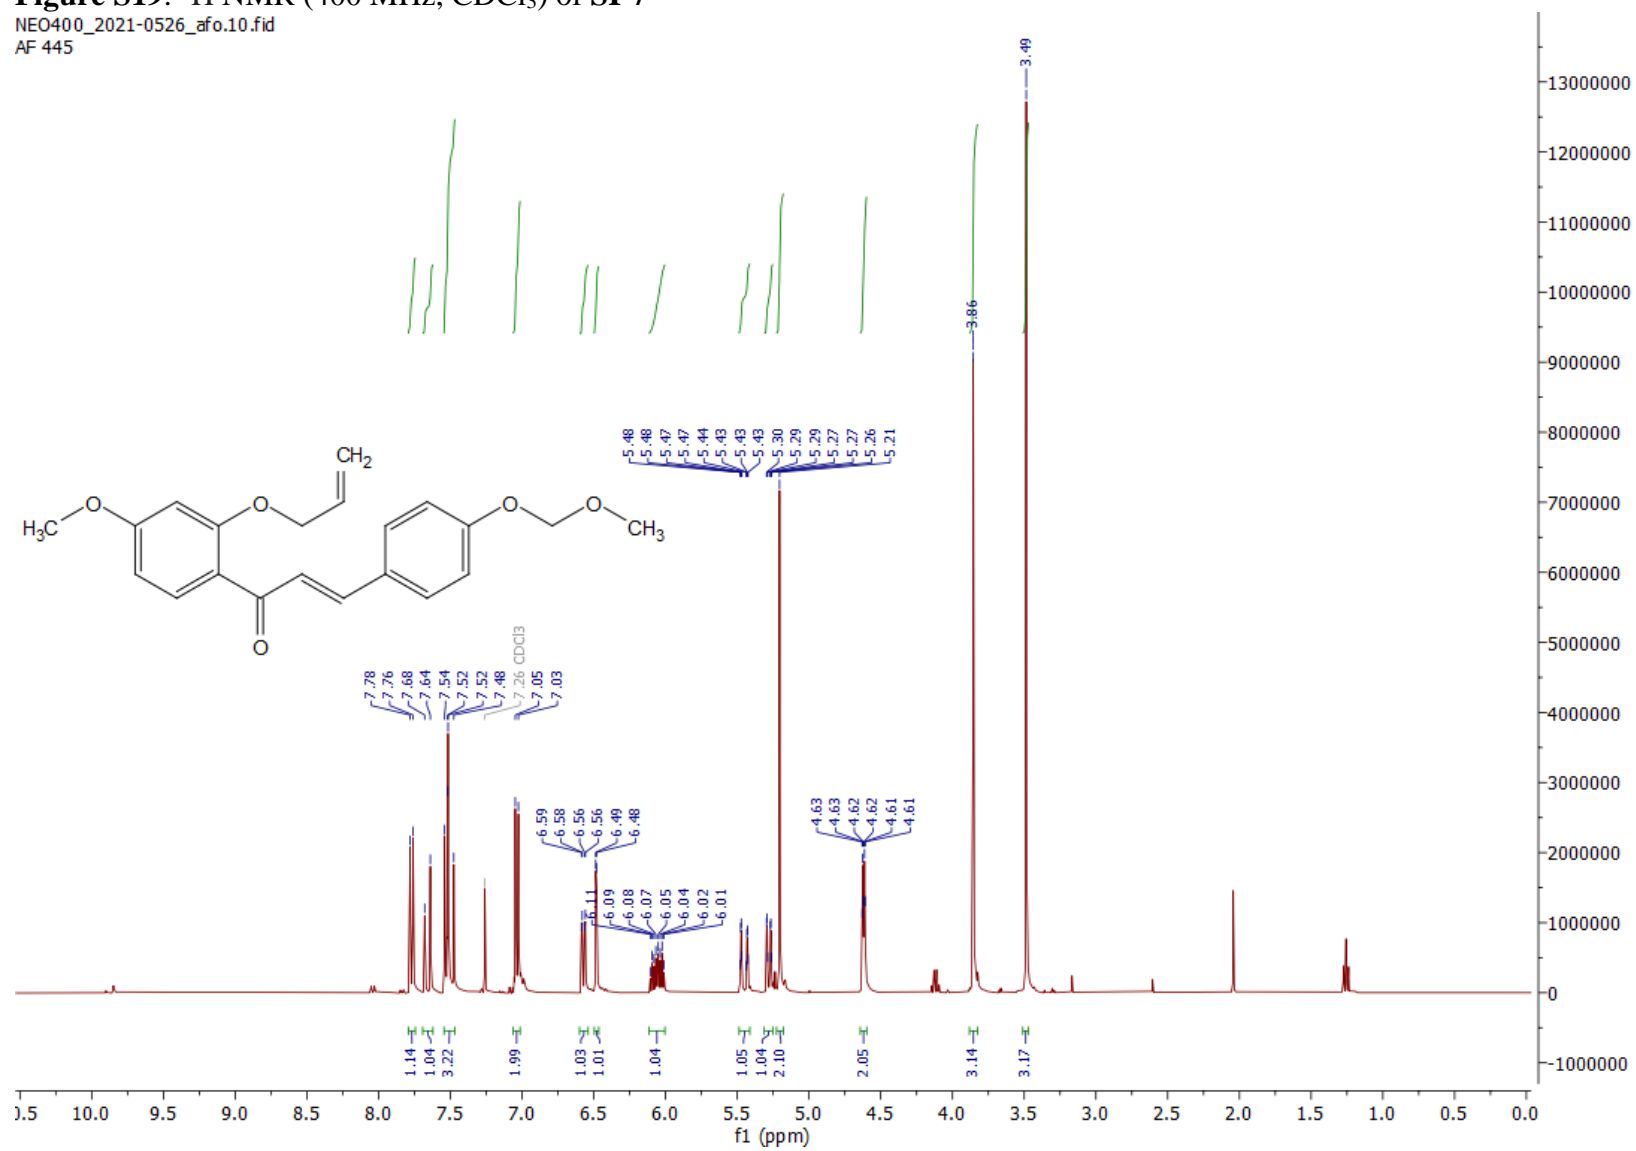

**Figure S20:**  $^{13}\text{C}\{^1\text{H}\}$  NMR (100 MHz,  $\text{CDCl}_3$ ) of **SI-7**

NEO400\_2021-0526\_afo.11.fid  
AF 445

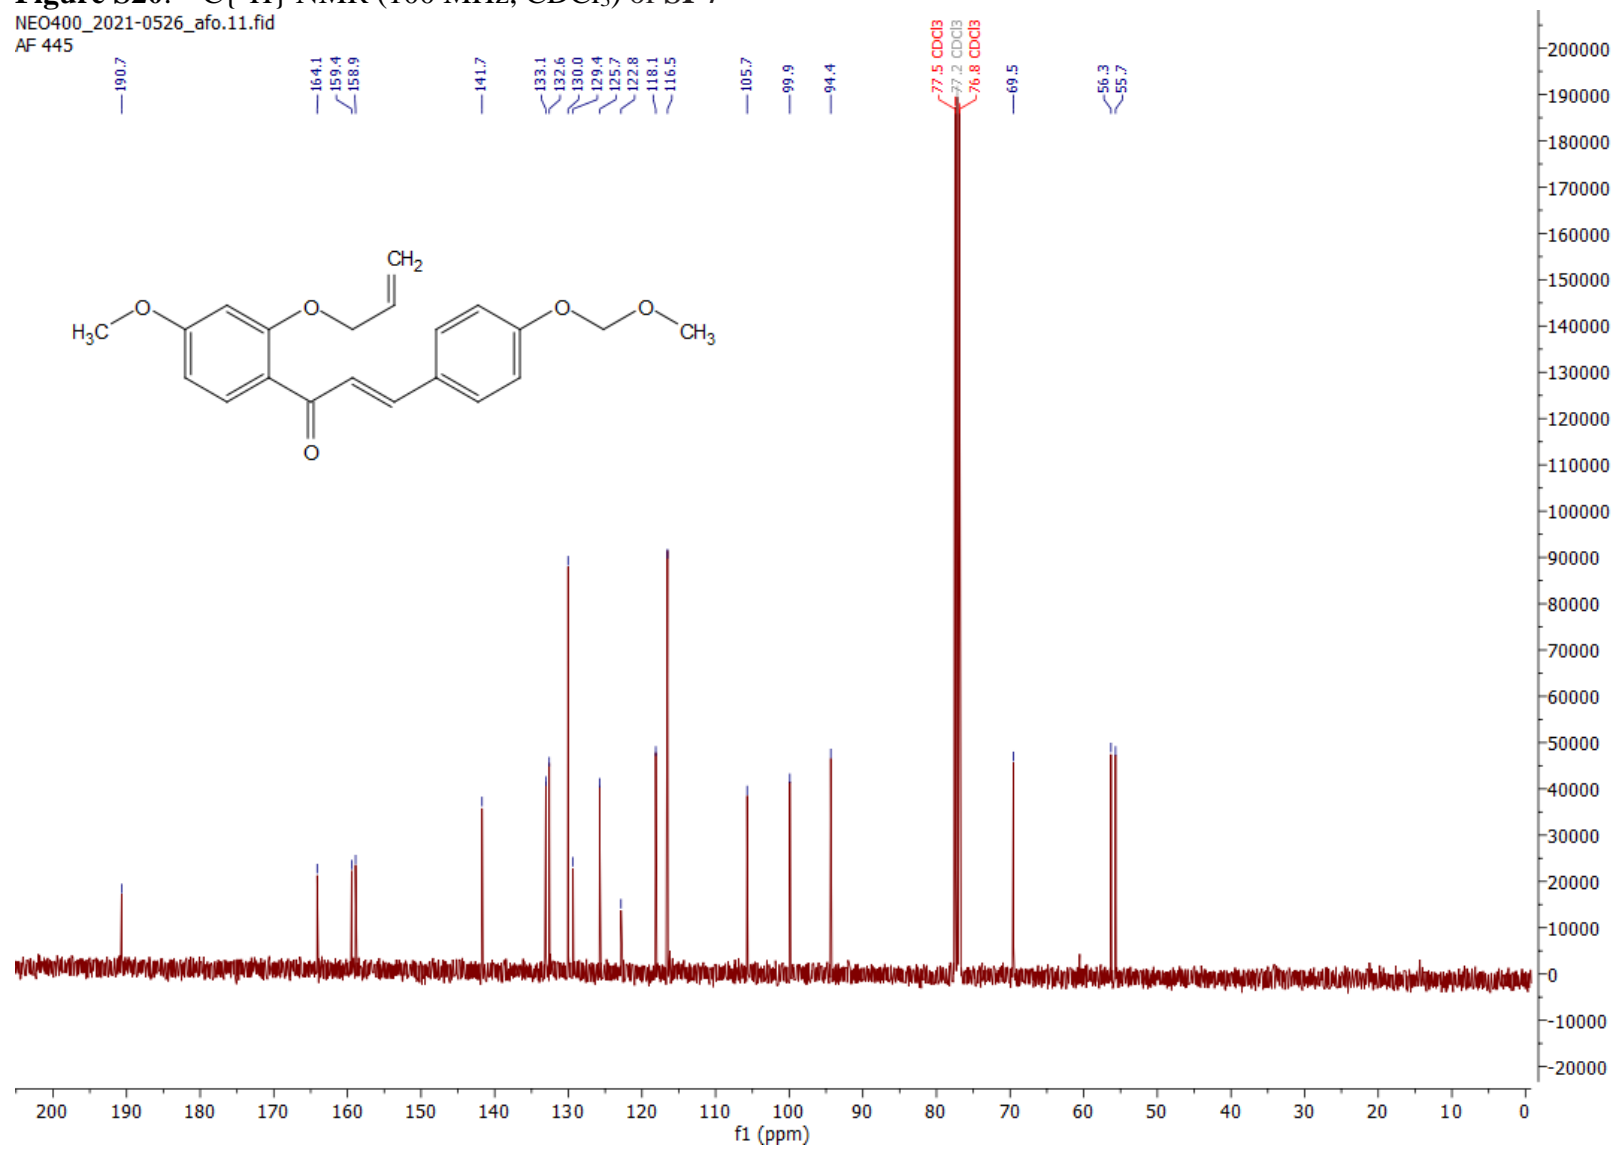

**Figure S21:**  $^1\text{H}$  NMR (400 MHz,  $\text{CDCl}_3$ ) of **15b**

NEO400\_2021-0603\_af0.40.fid  
AF 447 F2

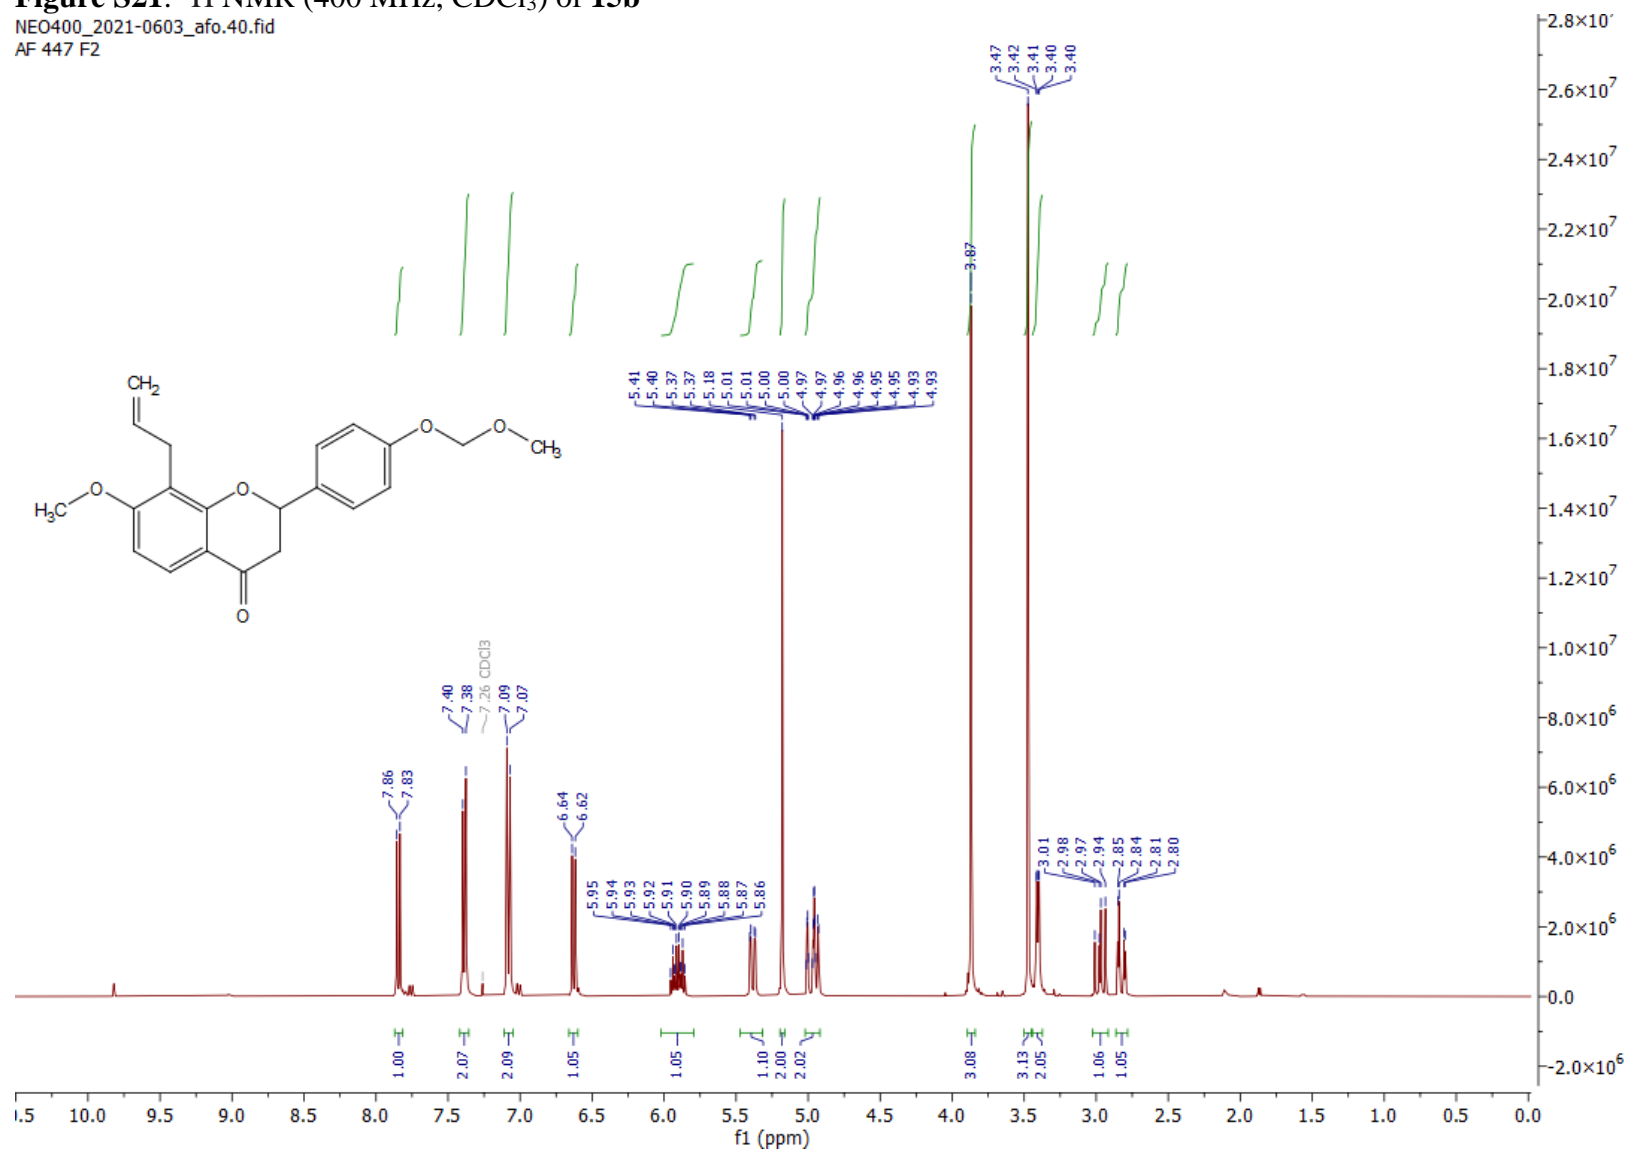

**Figure S22:**  $^{13}\text{C}\{^1\text{H}\}$  NMR (100 MHz,  $\text{CDCl}_3$ ) of **15b**

NEO400\_2021-0603\_afo.41.fid  
AF 447 F2

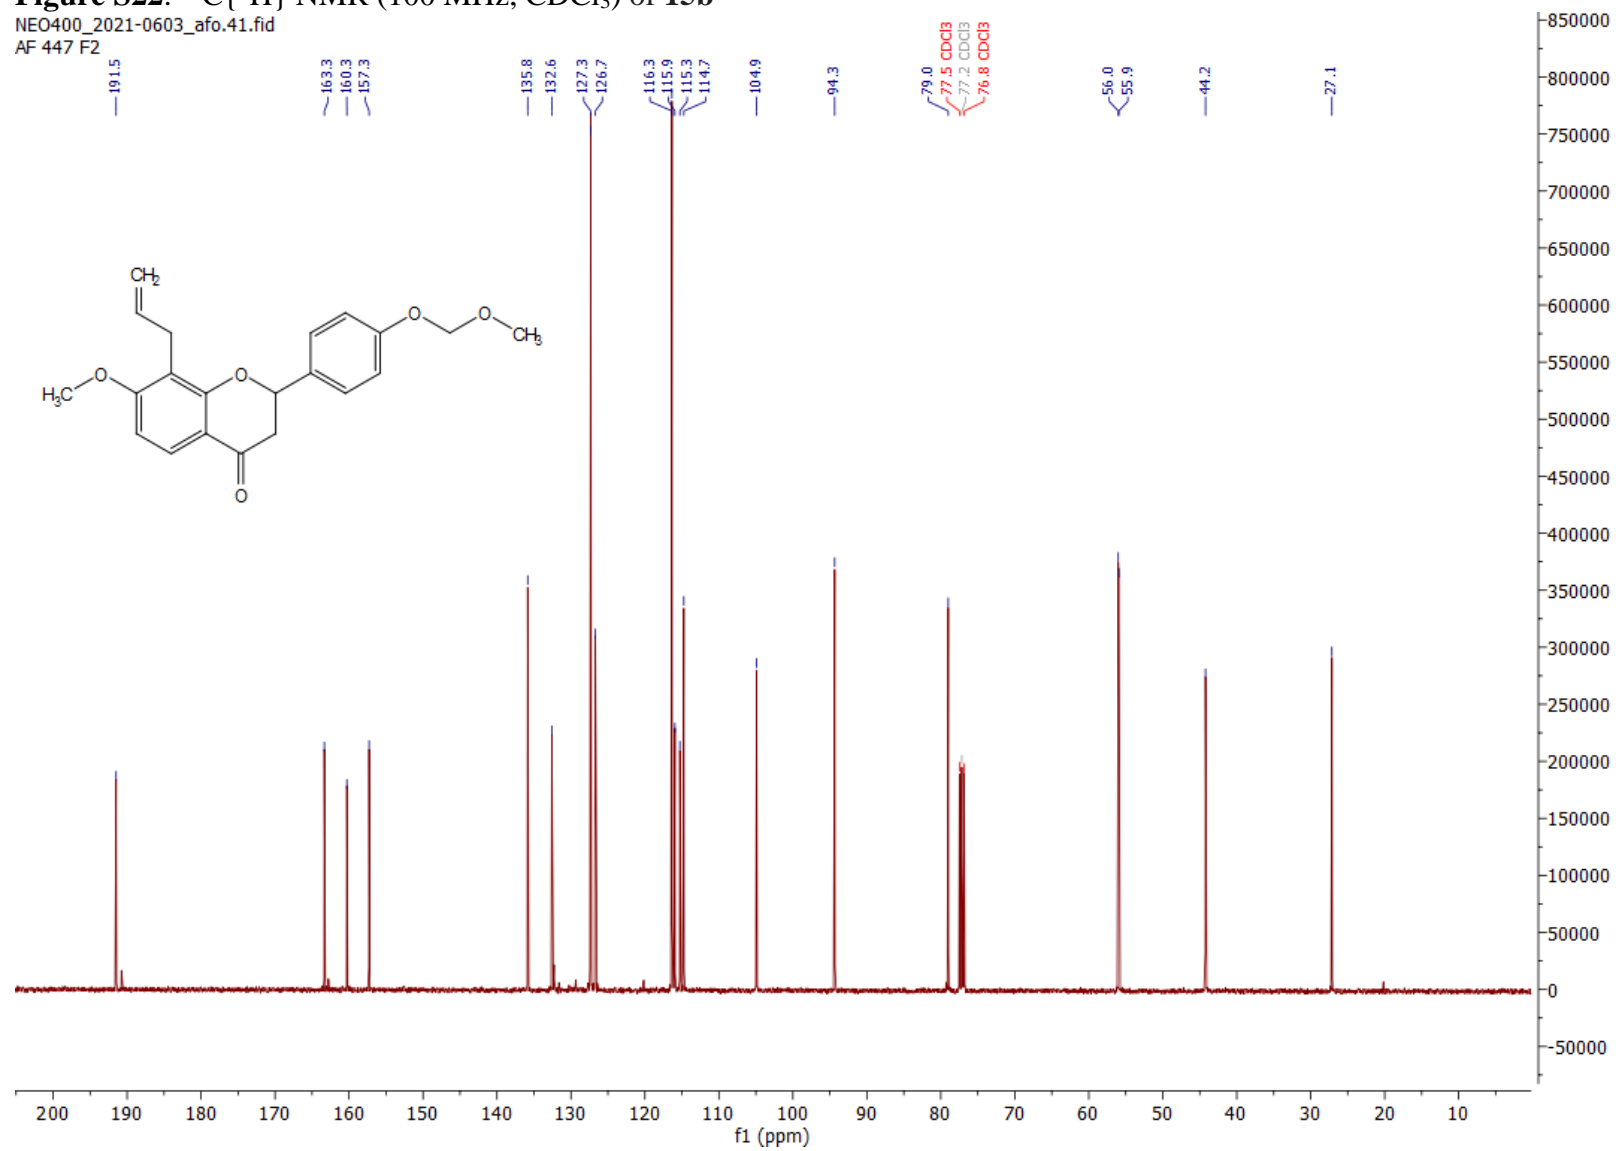



## C Copies of NMR-spectra

| compound    | page | compound    | page | compound    | page |
|-------------|------|-------------|------|-------------|------|
| <b>12aa</b> | S26  | <b>12ar</b> | S75  | <b>13aq</b> | S135 |
| <b>12ab</b> | S28  | <b>12at</b> | S77  | <b>14ar</b> | S141 |
| <b>12ac</b> | S30  | <b>12au</b> | S83  | <b>13at</b> | S148 |
| <b>12ad</b> | S32  | <b>13aa</b> | S85  | <b>14au</b> | S155 |
| <b>12ae</b> | S34  | <b>13ab</b> | S91  | <b>16af</b> | S162 |
| <b>12af</b> | S36  | <b>13ac</b> | S93  | <b>16bf</b> | S167 |
| <b>12ag</b> | S43  | <b>13ad</b> | S95  | <b>16cf</b> | S171 |
| <b>12ah</b> | S45  | <b>13ae</b> | S97  | <b>17af</b> | S175 |
| <b>12ai</b> | S51  | <b>14ae</b> | S103 | <b>17bf</b> | S180 |
| <b>12ak</b> | S57  | <b>13af</b> | S109 | <b>17cf</b> | S184 |
| <b>12al</b> | S59  | <b>13ai</b> | S116 | <b>18af</b> | S188 |
| <b>12am</b> | S61  | <b>13ak</b> | S118 | <b>18bf</b> | S190 |
| <b>12an</b> | S63  | <b>13al</b> | S120 | <b>18cf</b> | S192 |
| <b>12ao</b> | S65  | <b>14am</b> | S126 | <b>20</b>   | S194 |
| <b>12ap</b> | S67  | <b>13an</b> | S131 | <b>21</b>   | S199 |
| <b>12aq</b> | S73  | <b>13ap</b> | S133 | <b>23</b>   | S204 |

**Figure S23:**  $^1\text{H}$  NMR (400 MHz,  $\text{CDCl}_3$ ) of **12aa**

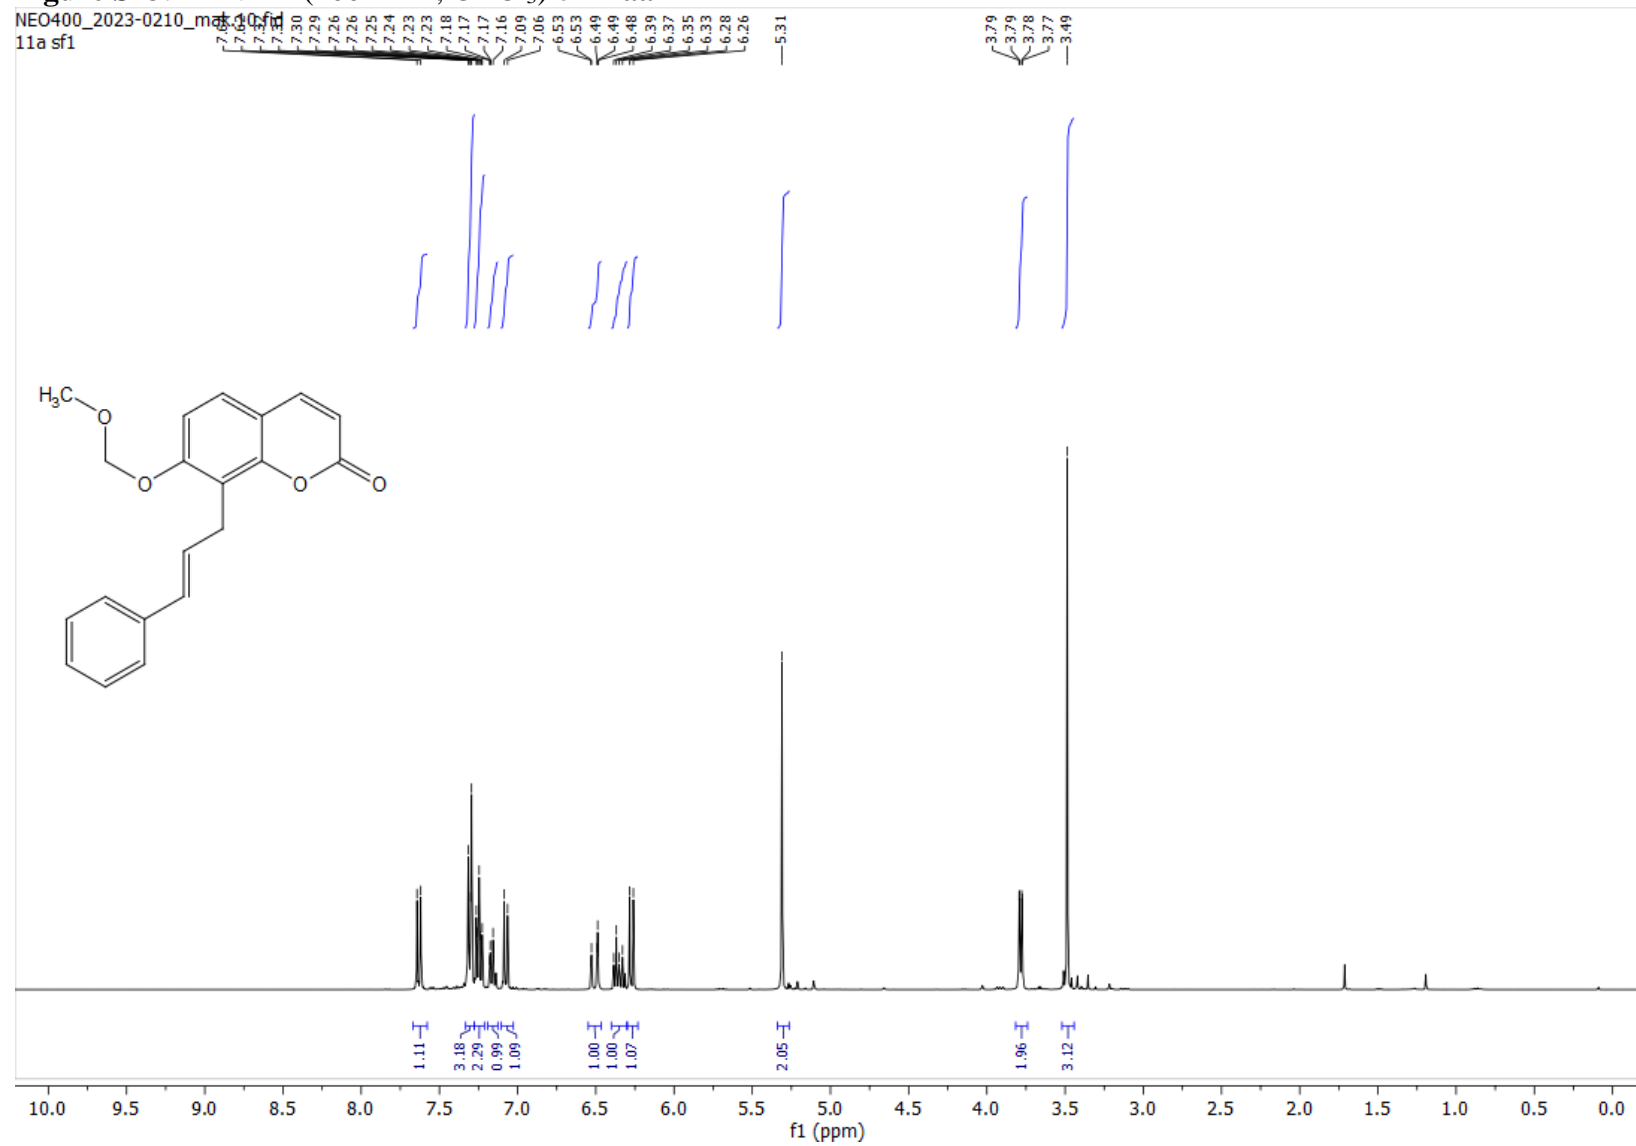

**Figure S24:**  $^{13}\text{C}\{^1\text{H}\}$  NMR (100 MHz,  $\text{CDCl}_3$ ) of **12aa**

NEO400\_2023-0210\_mak.11.fid  
11a sf1

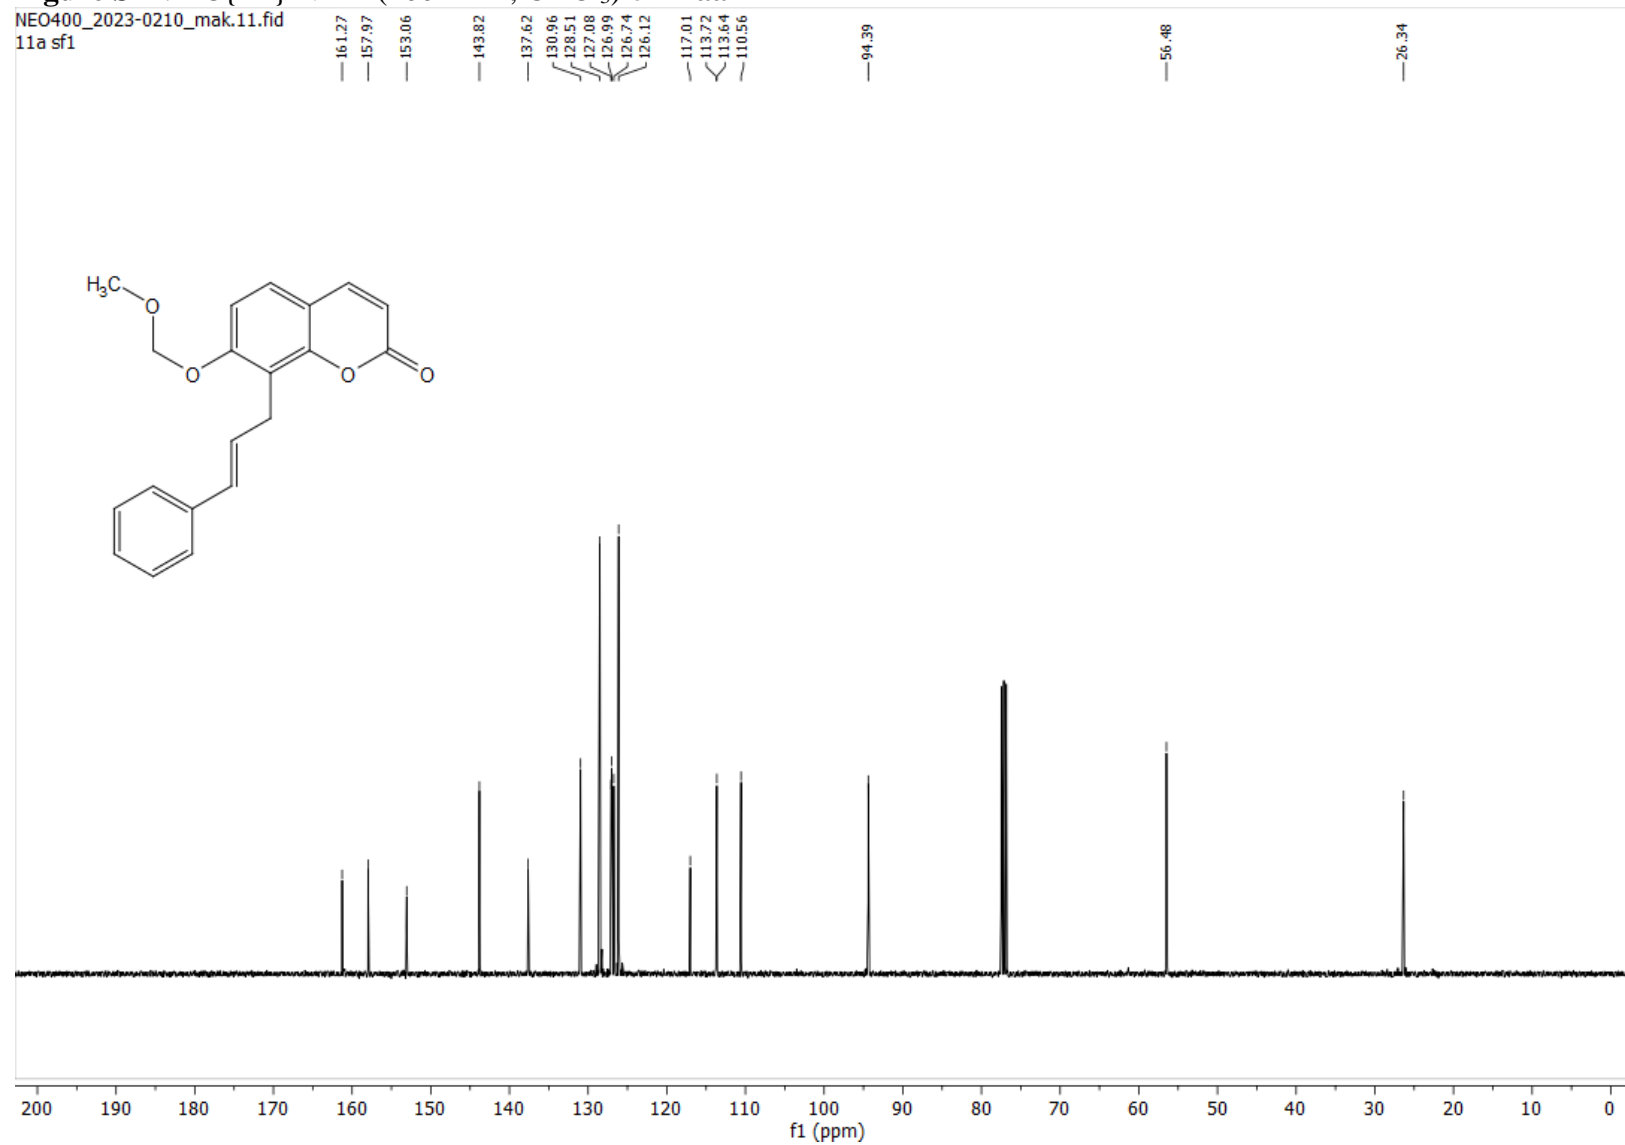

Figure S25:  $^1\text{H}$  NMR (400 MHz,  $\text{CDCl}_3$ ) of 12ab

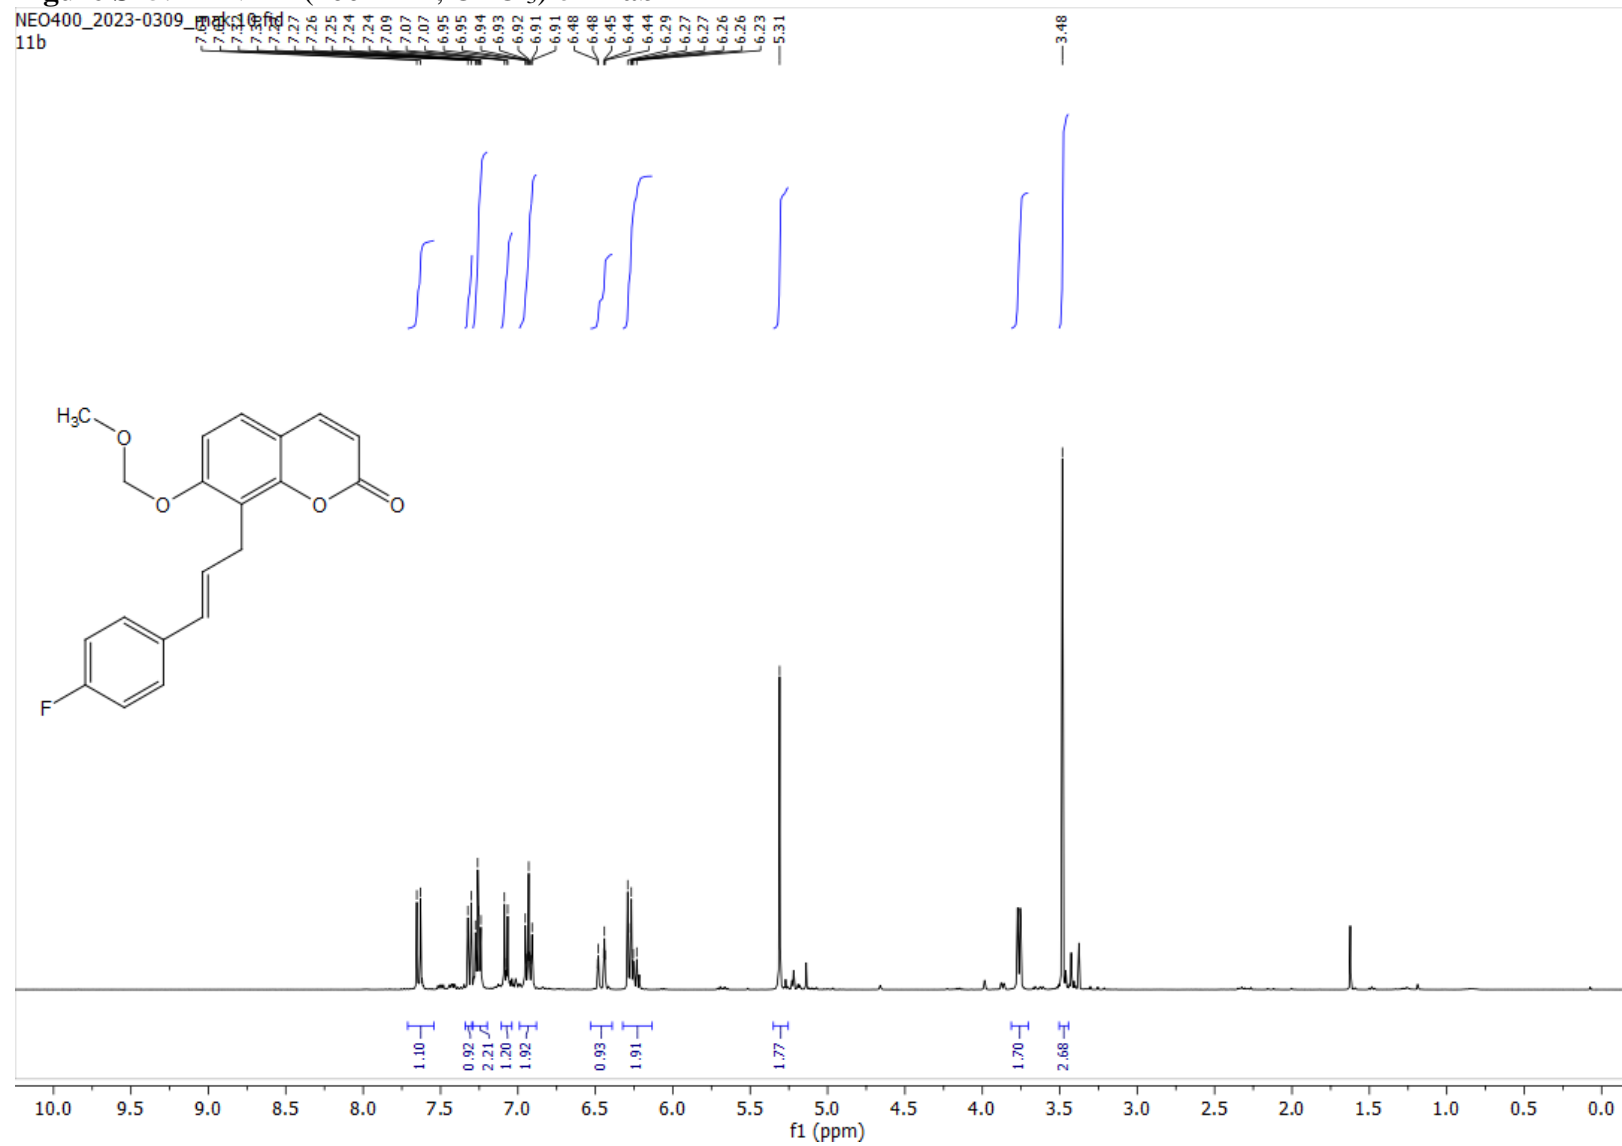

**Figure S26:**  $^{13}\text{C}\{^1\text{H}\}$  NMR (100 MHz,  $\text{CDCl}_3$ ) of **12ab**

NEO400\_2023-0309\_mak.11.fid  
11b

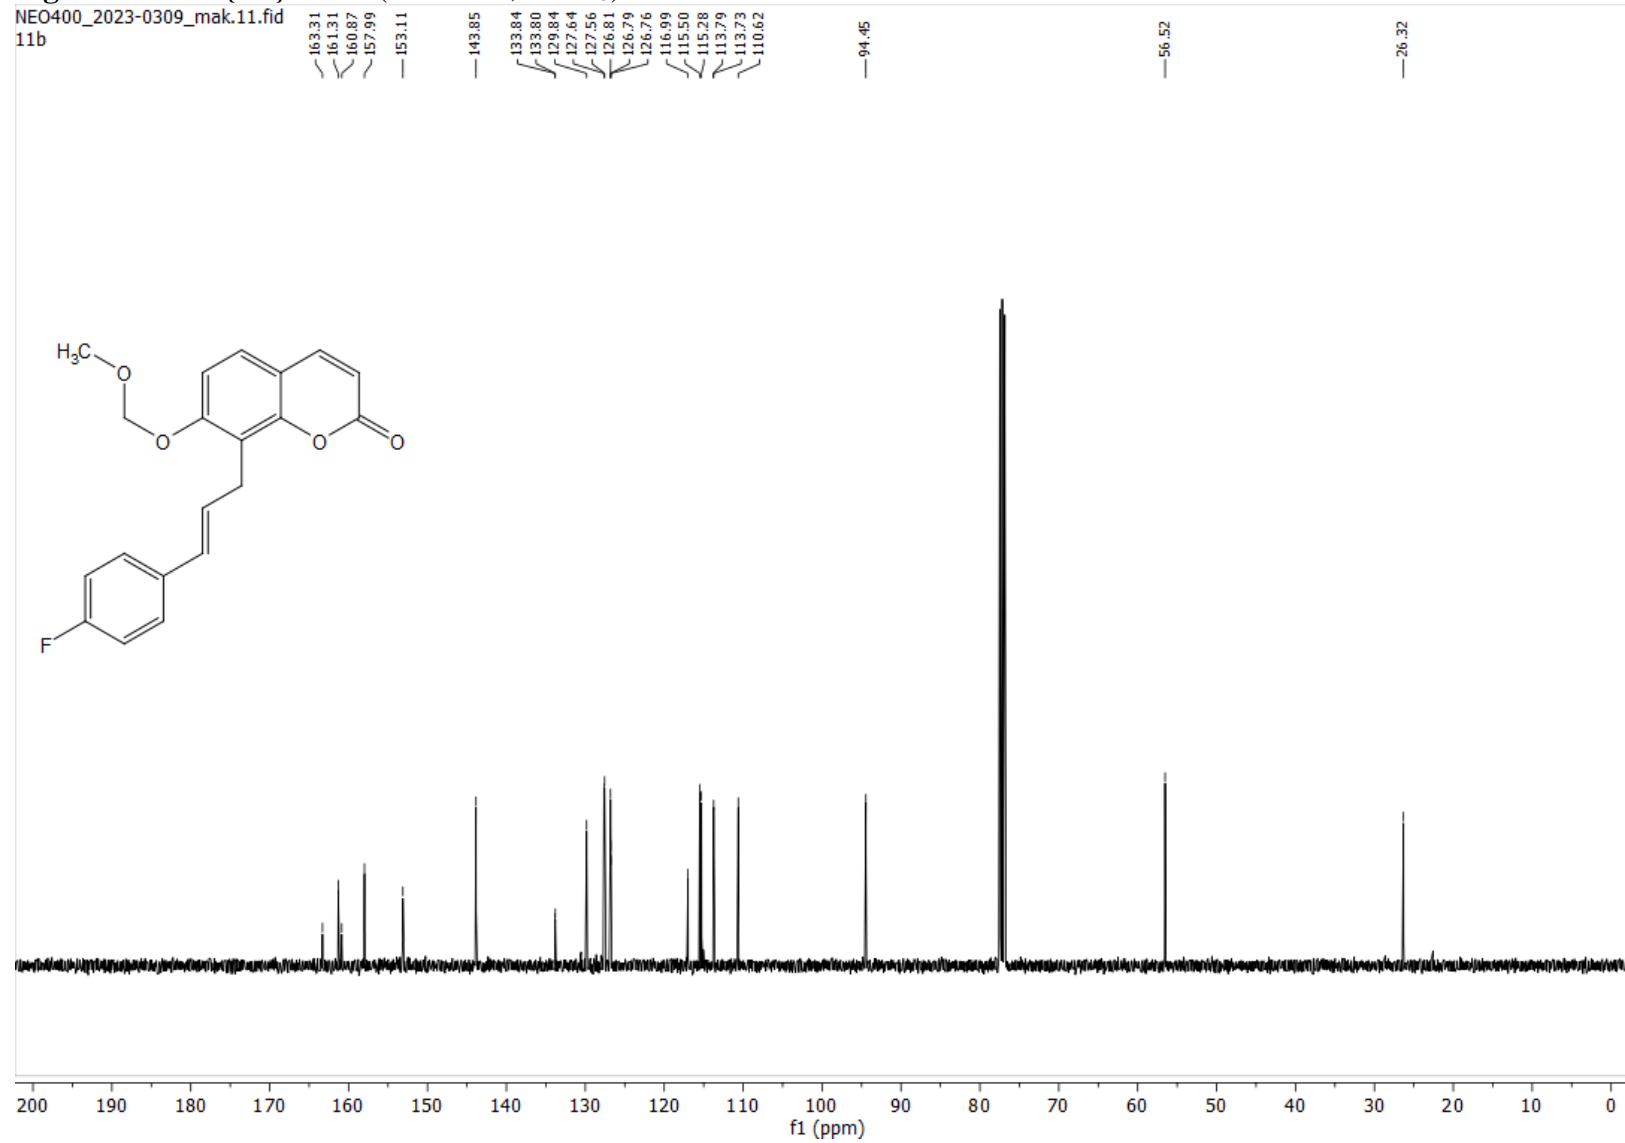

Figure S27:  $^1\text{H}$  NMR (400 MHz,  $\text{CDCl}_3$ ) of 12ac

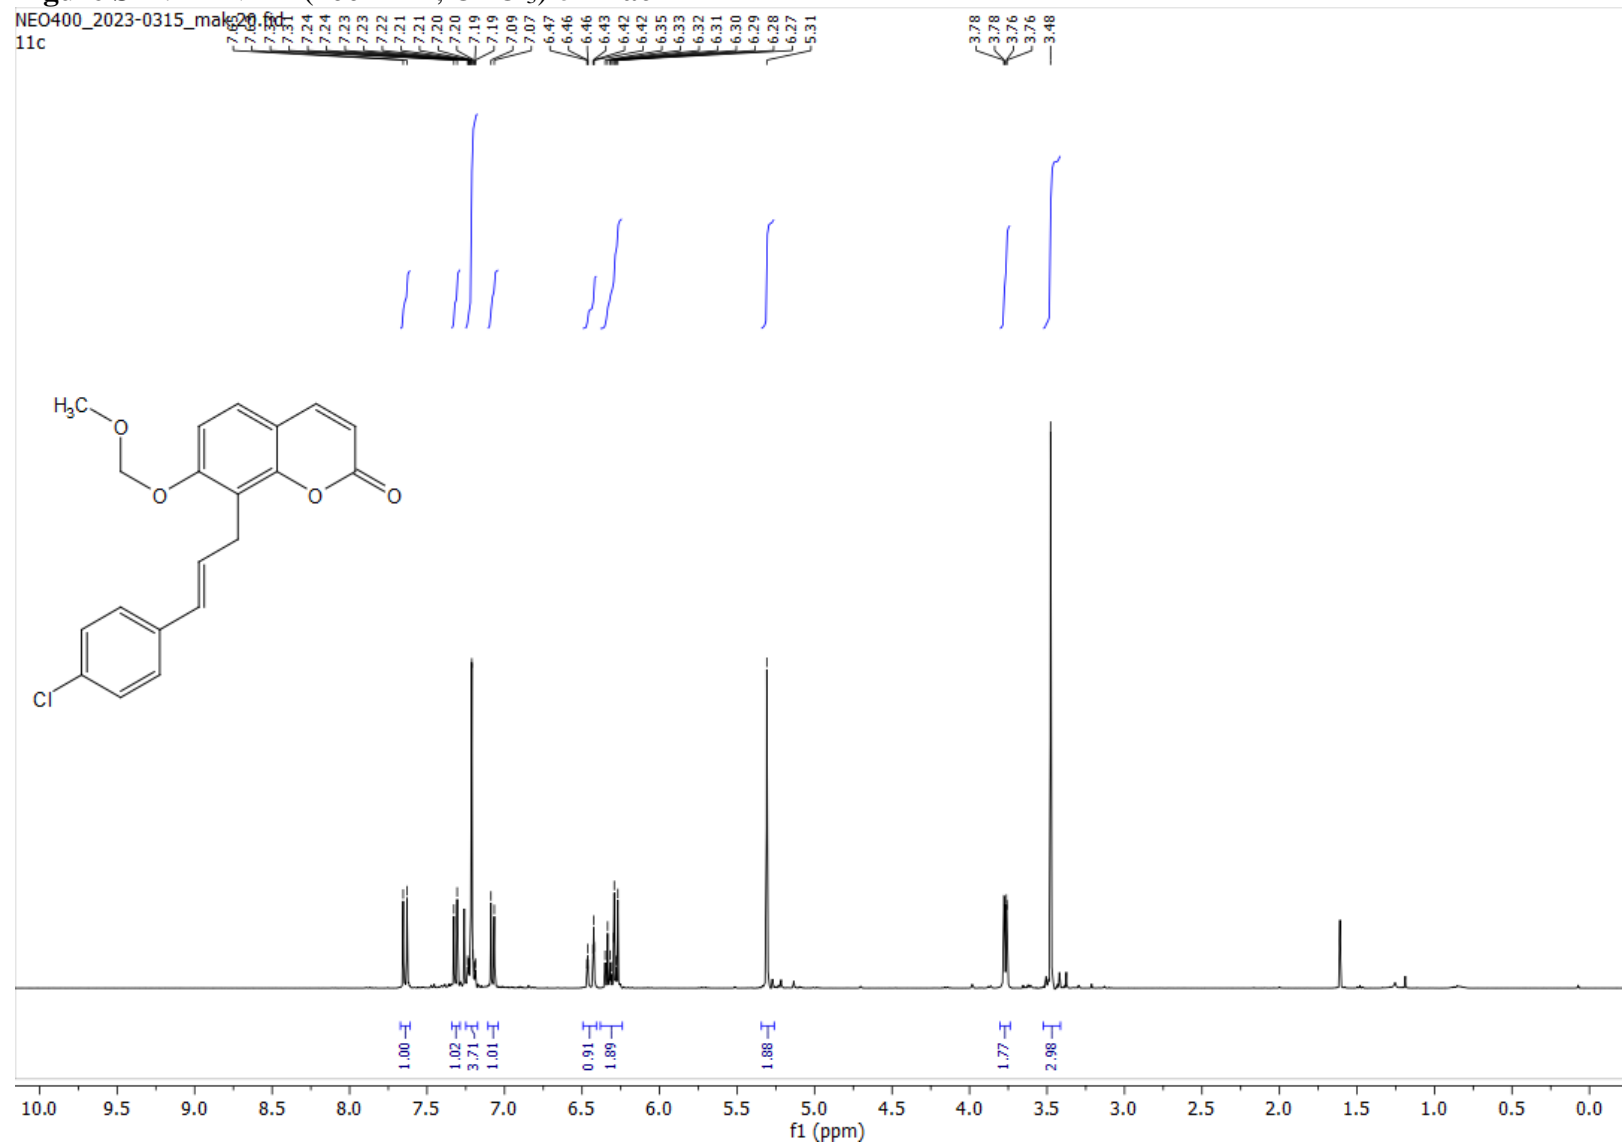

**Figure S28:**  $^{13}\text{C}\{^1\text{H}\}$  NMR (100 MHz,  $\text{CDCl}_3$ ) of **12ac**

NEO400\_2023-0315\_mak.21.fid  
11c

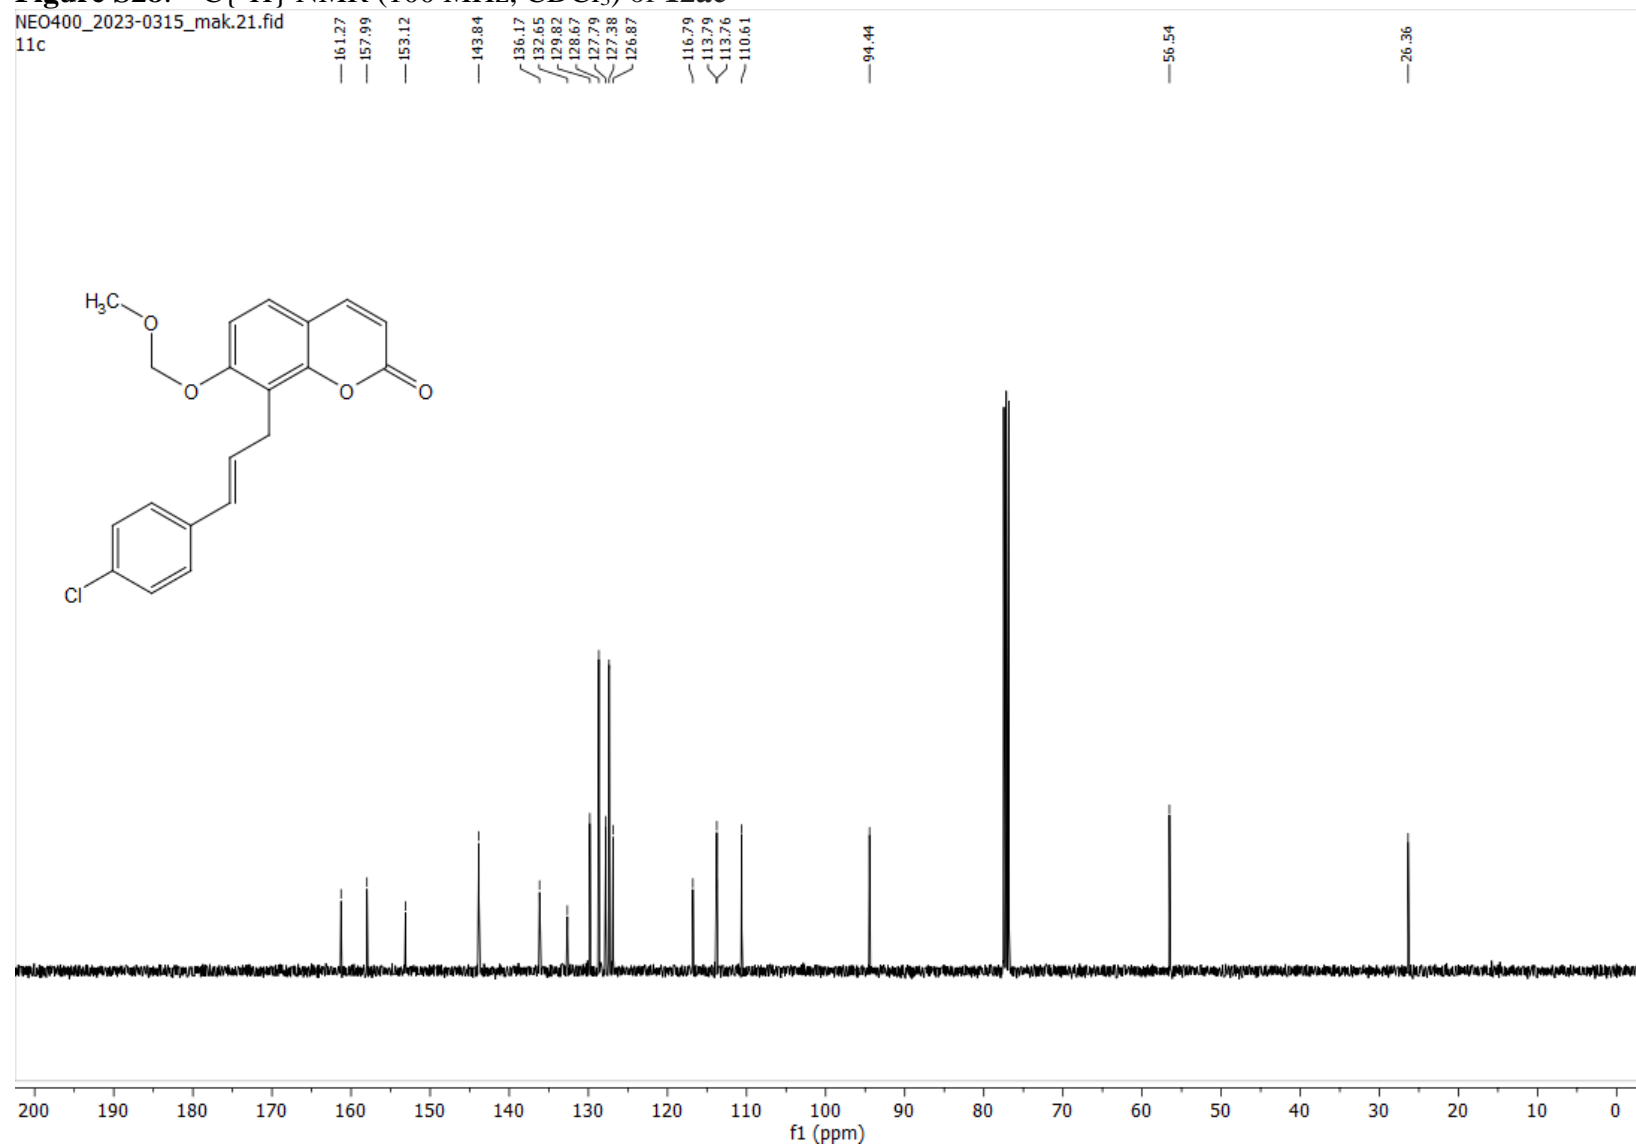

**Figure S29:**  $^1\text{H}$  NMR (400 MHz,  $\text{CDCl}_3$ ) of **12ad**

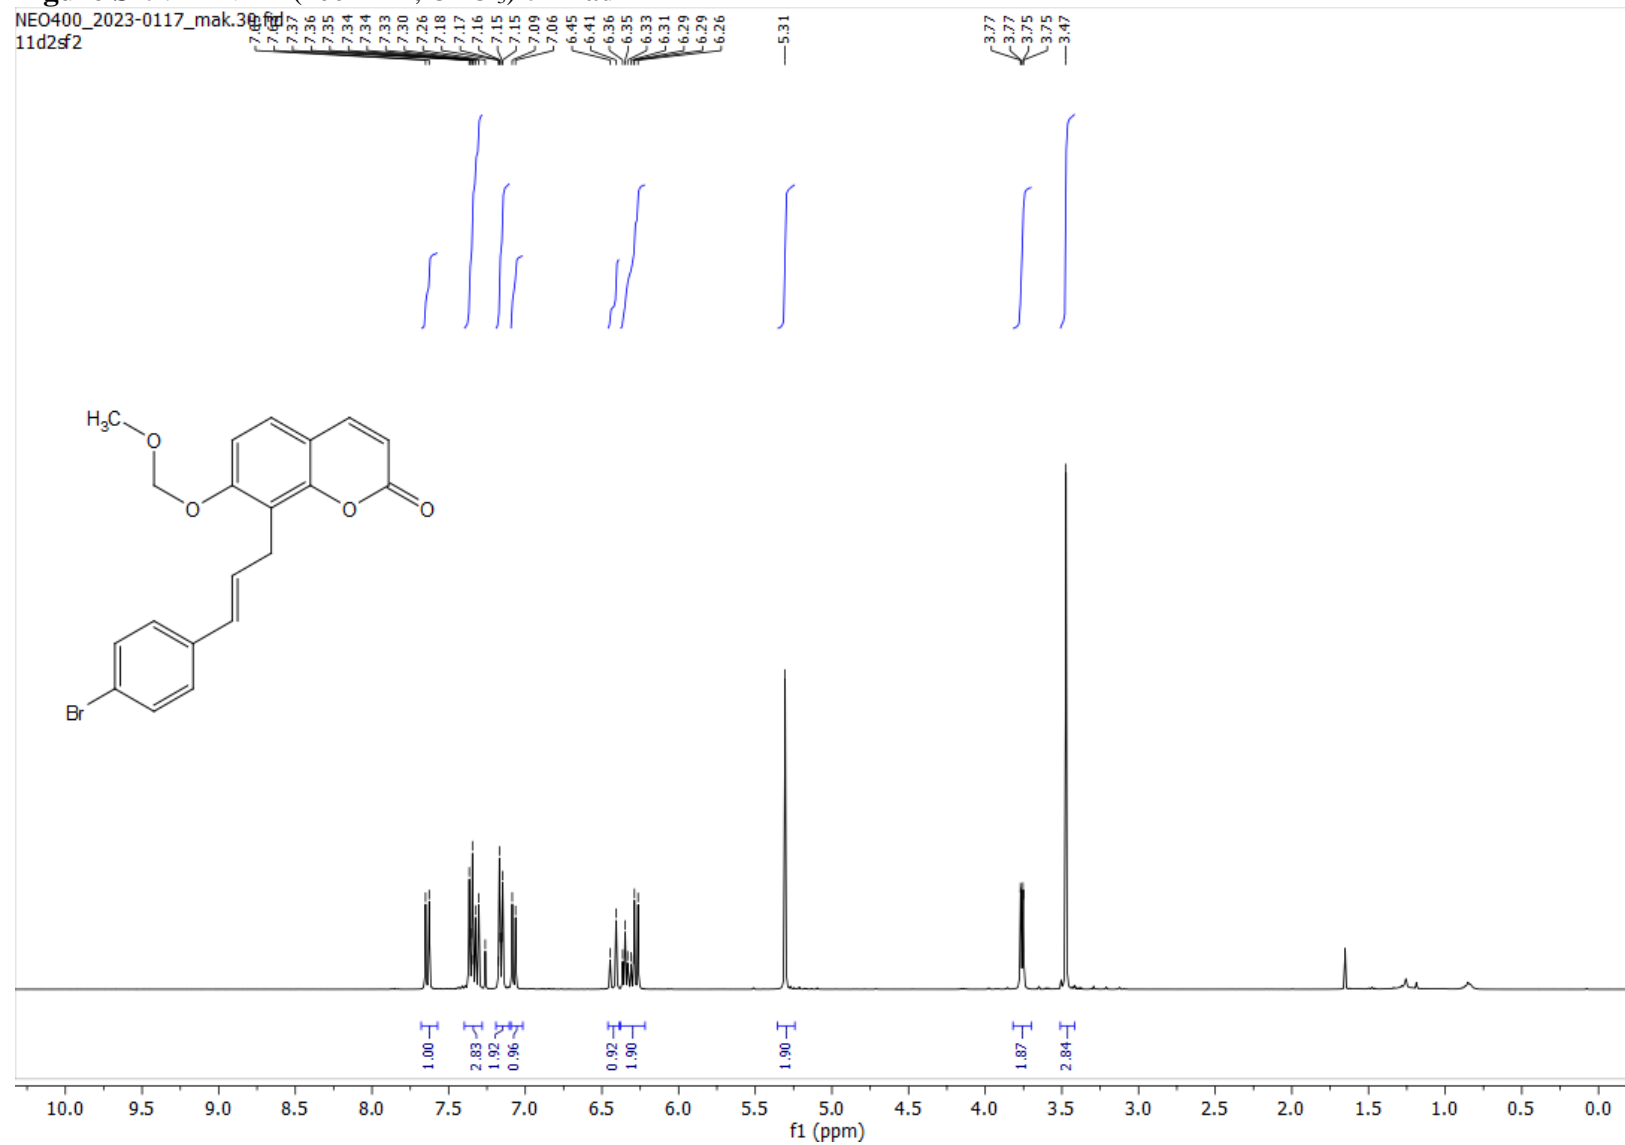



**Figure S30:**  $^{13}\text{C}\{^1\text{H}\}$  NMR (100 MHz,  $\text{CDCl}_3$ ) of **12ad**

NEO400\_2023-0117\_mak.31.fid  
11d2sf2

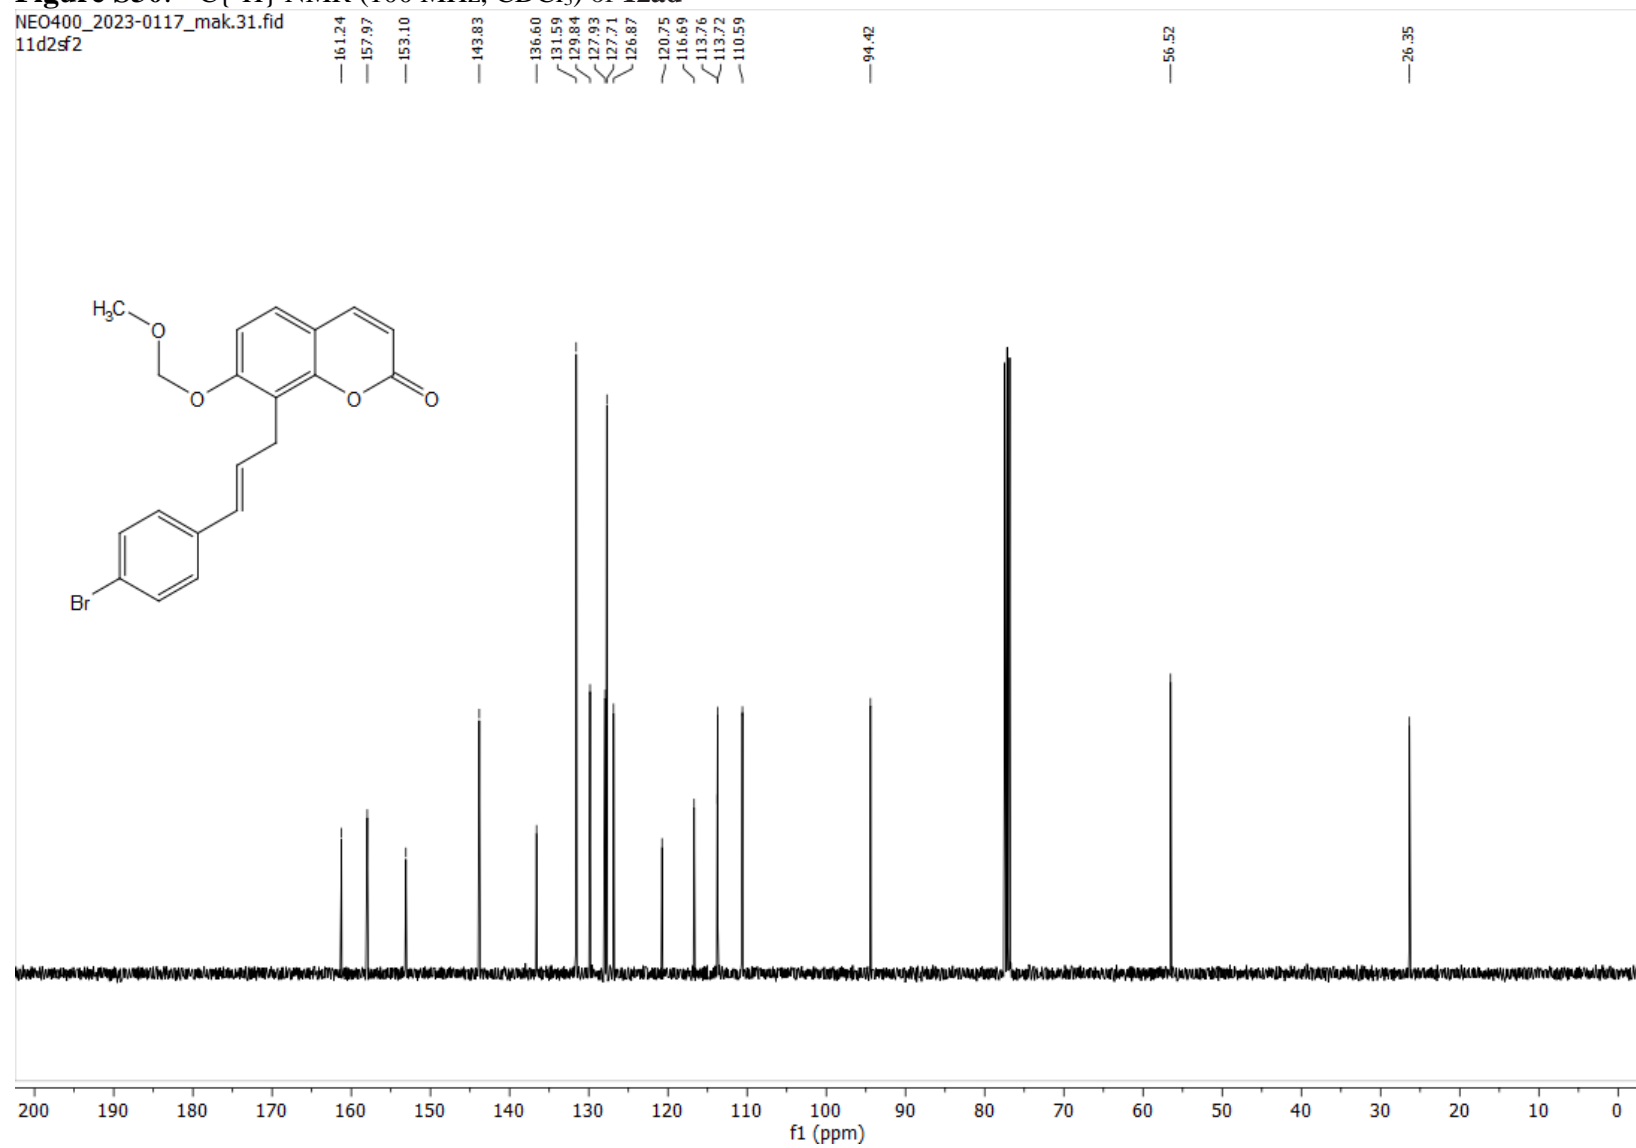

**Figure S31:**  $^1\text{H}$  NMR (400 MHz,  $\text{CDCl}_3$ ) of **12ae**

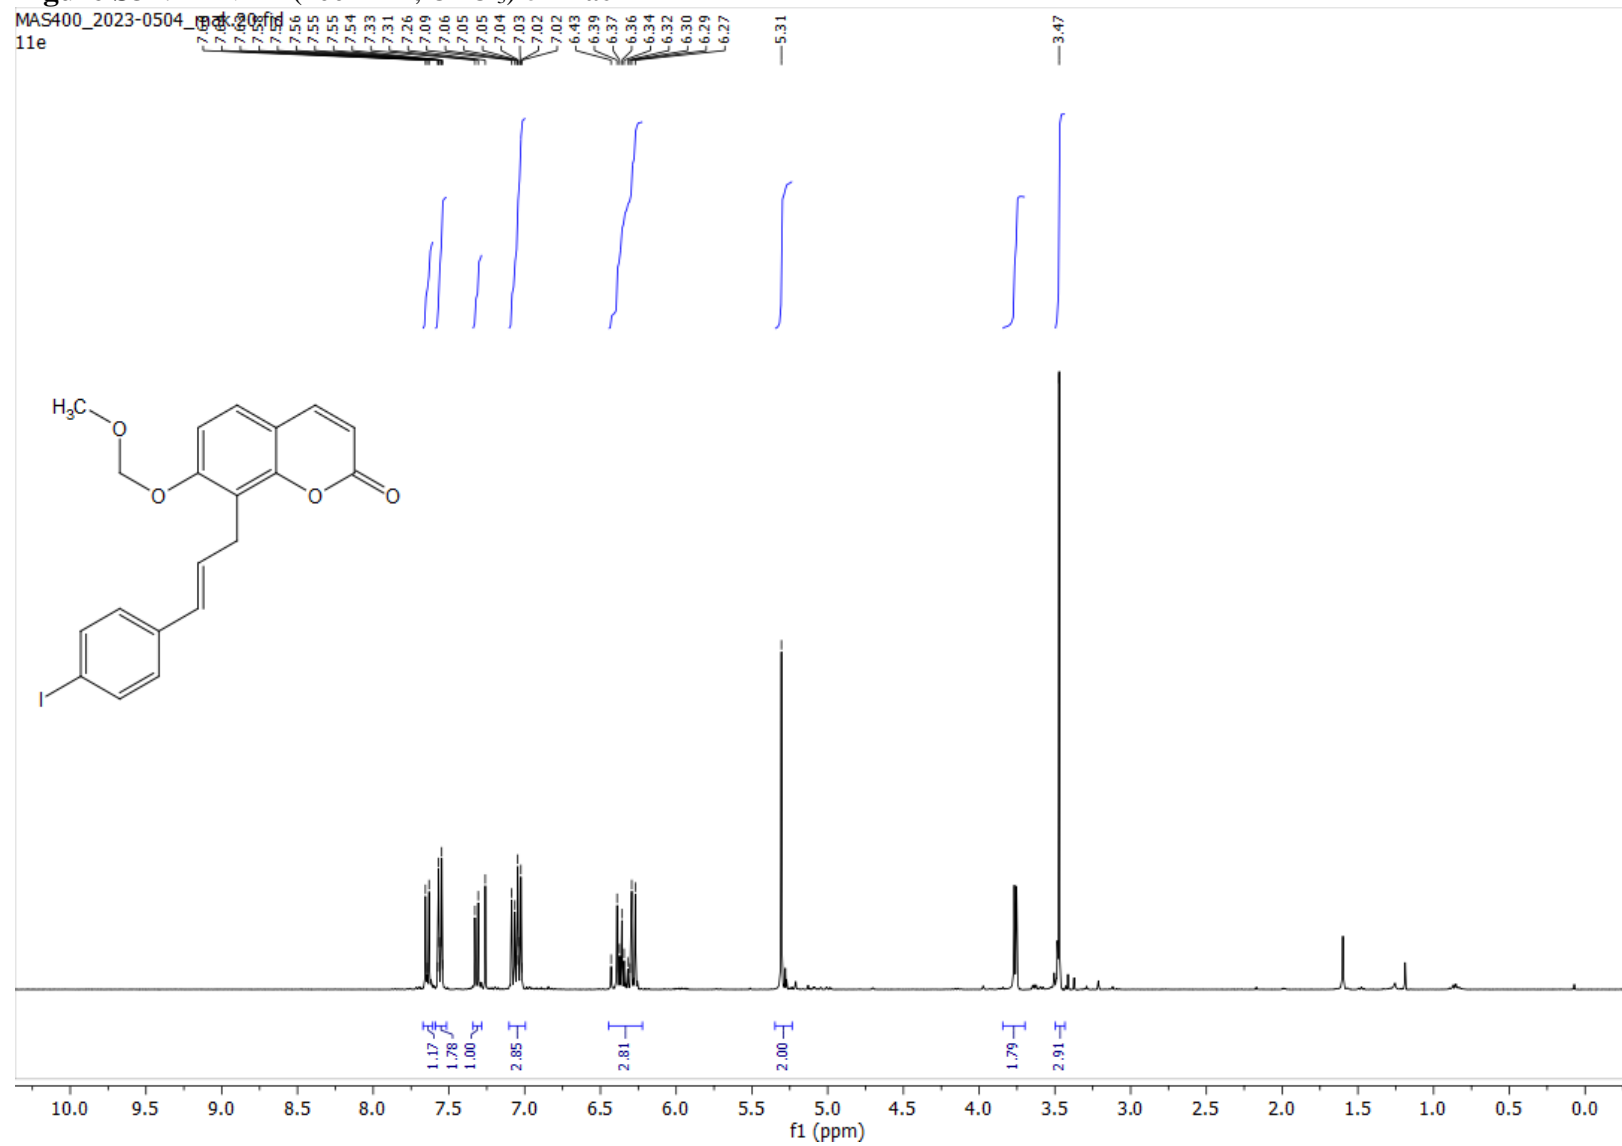

**Figure S32:**  $^{13}\text{C}\{^1\text{H}\}$  NMR (100 MHz,  $\text{CDCl}_3$ ) of **12ae**

MAS400\_2023-0504\_mak.21.fid  
11e

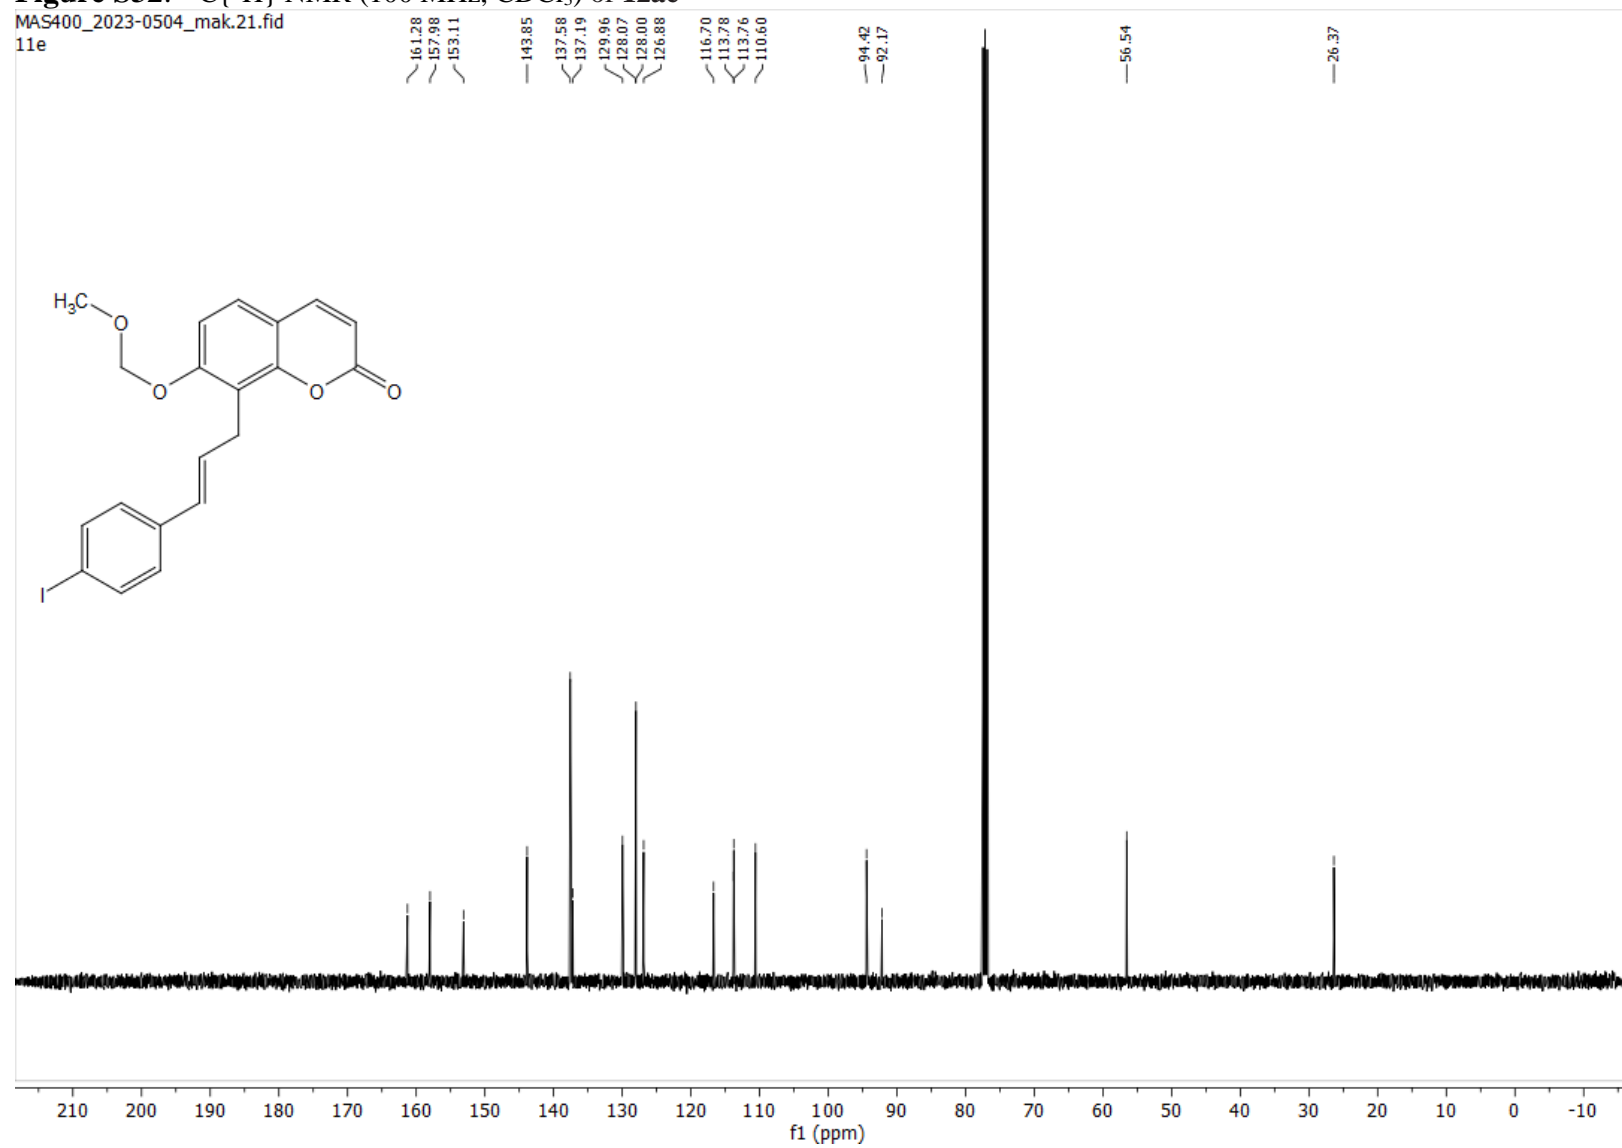

**Figure S33:** NMR-Signal assignment and selected HMBC-couplings for compound **12af**

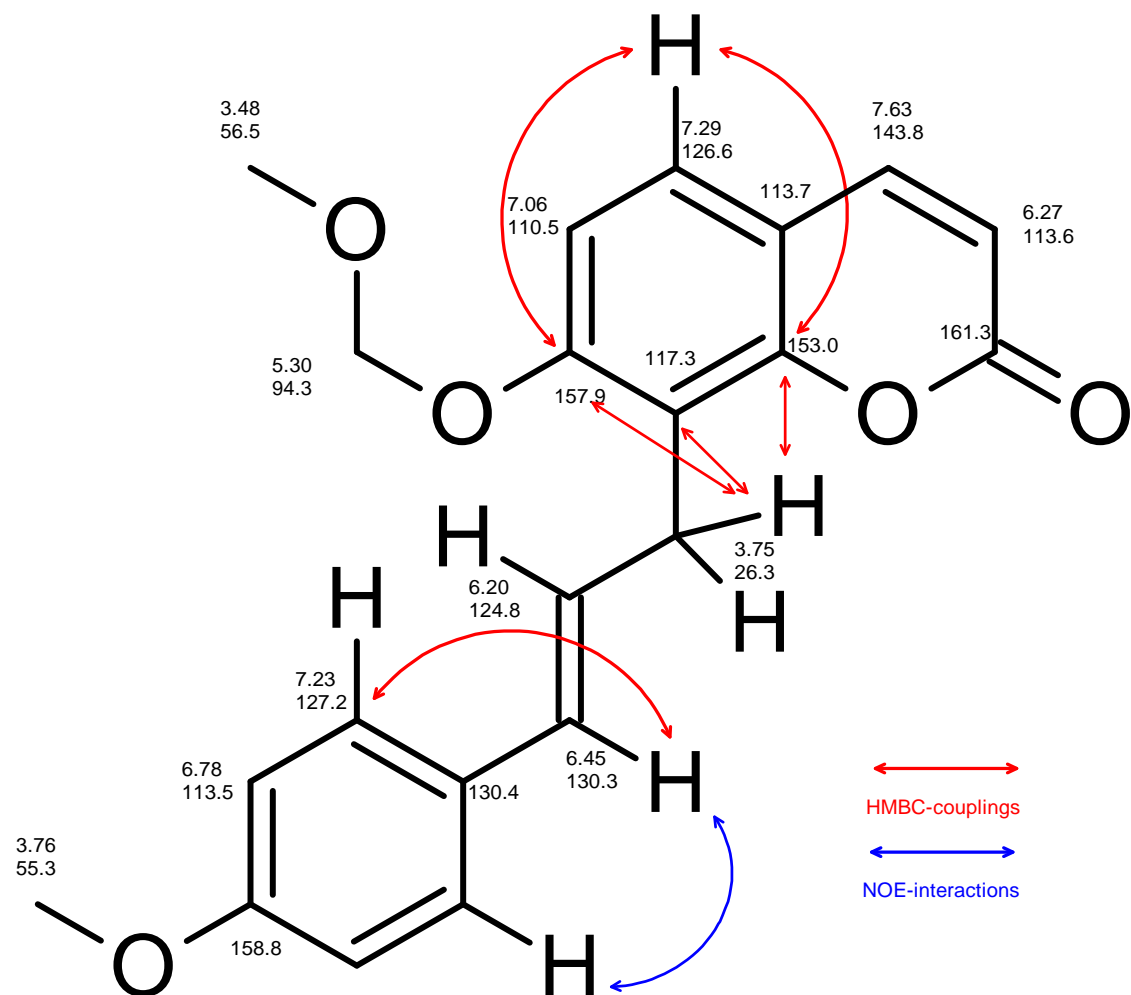

**Figure S34:**  $^1\text{H}$  NMR (400 MHz,  $\text{CDCl}_3$ ) of **12af**

NEO400\_2022-1128\_mak.10.fid  
667umkristallisiert

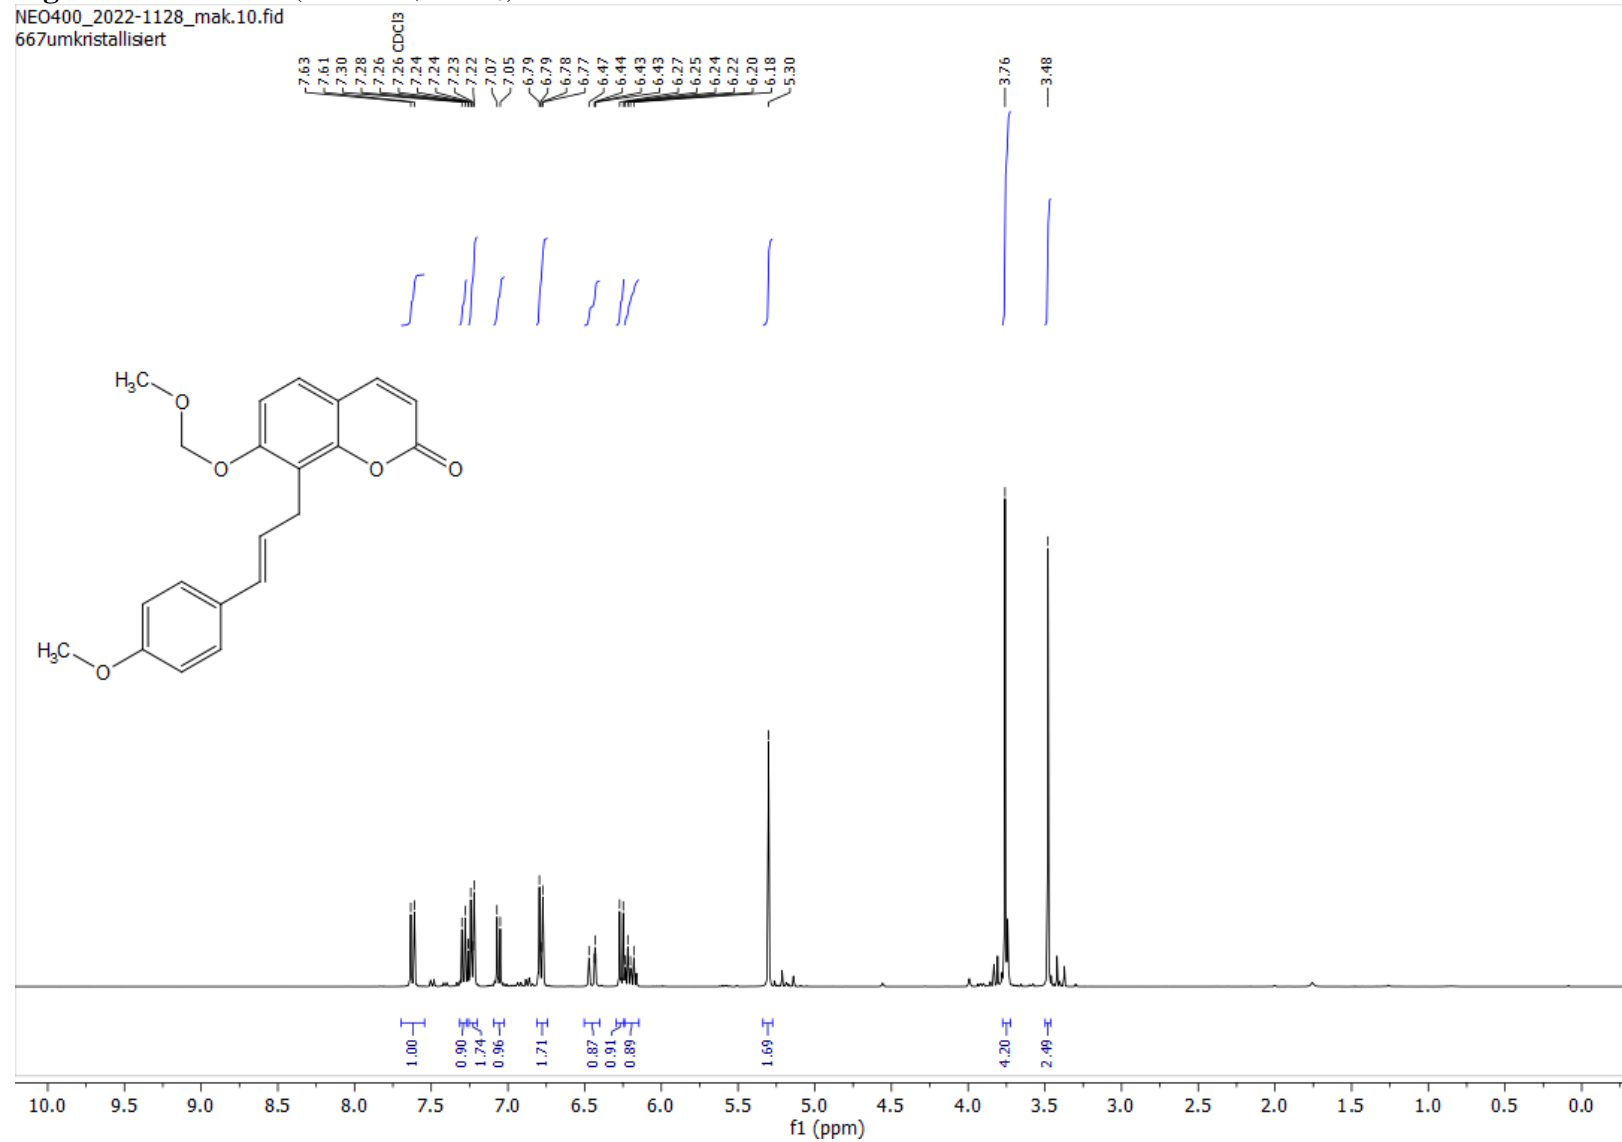

**Figure S35:**  $^{13}\text{C}\{^1\text{H}\}$  NMR (100 MHz,  $\text{CDCl}_3$ ) of **12af**

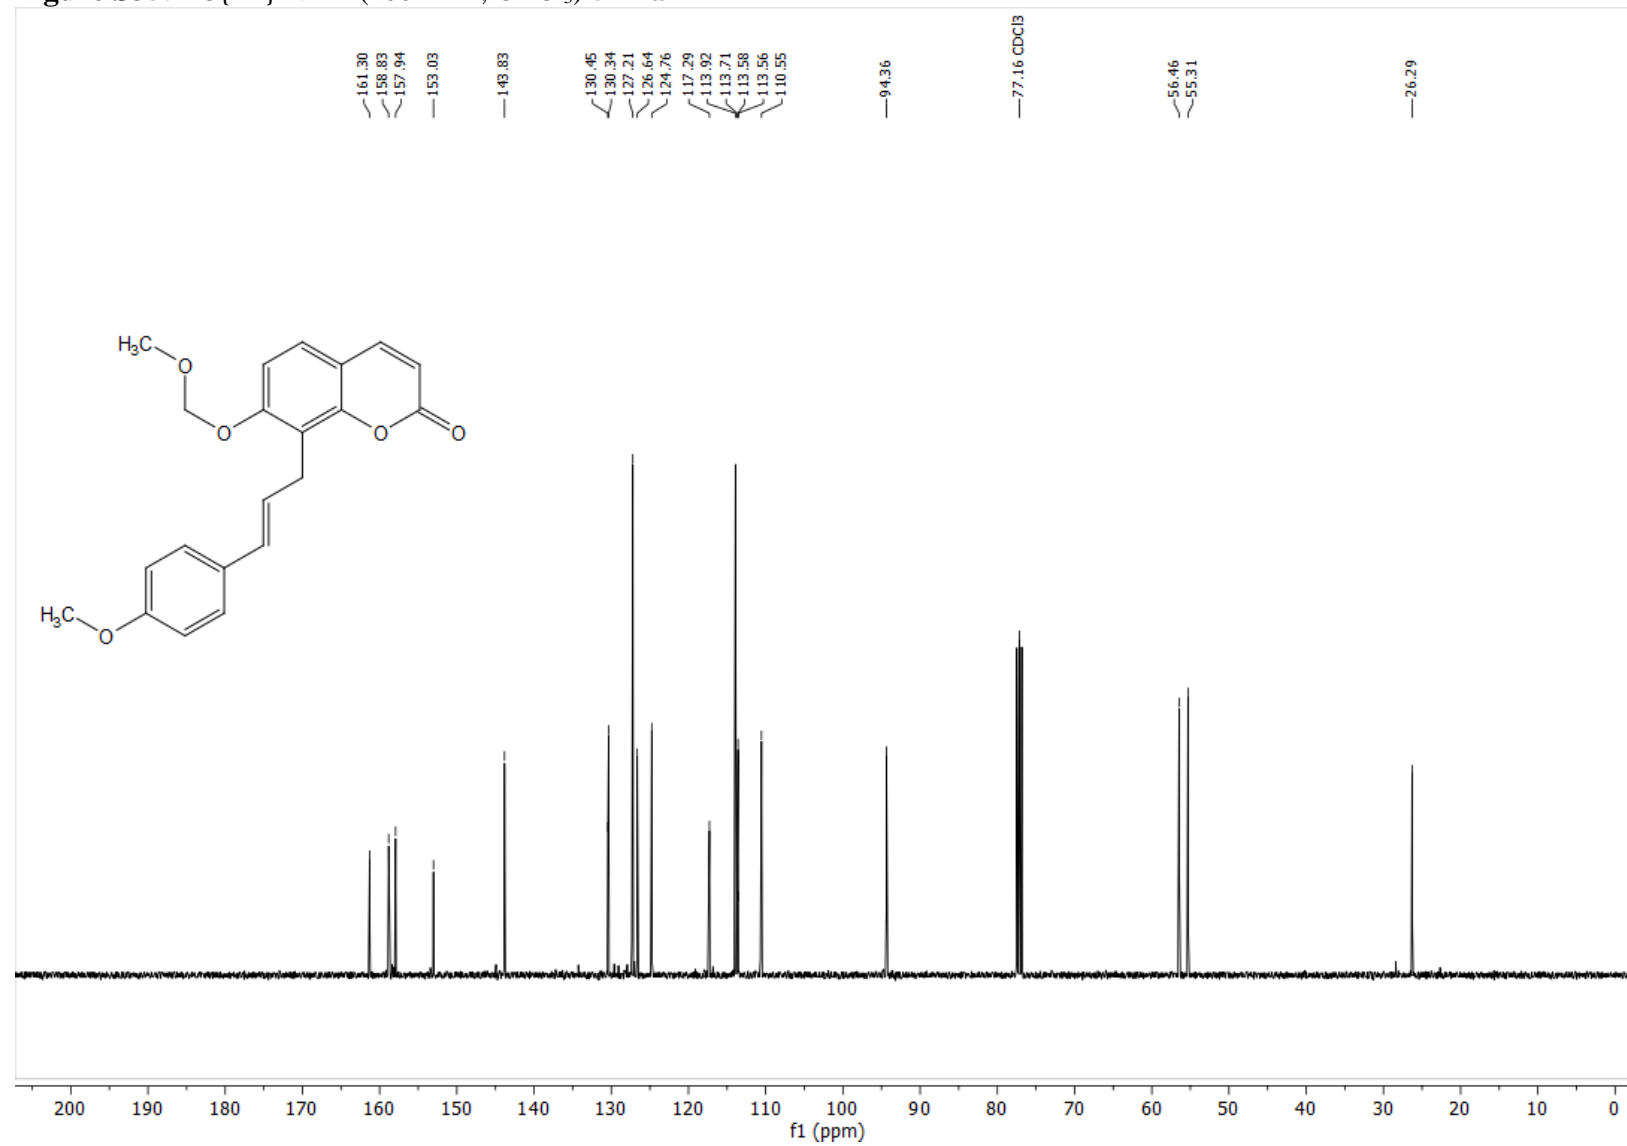

**Figure S36:** COSY (400 MHz, CDCl<sub>3</sub>) of **12af**

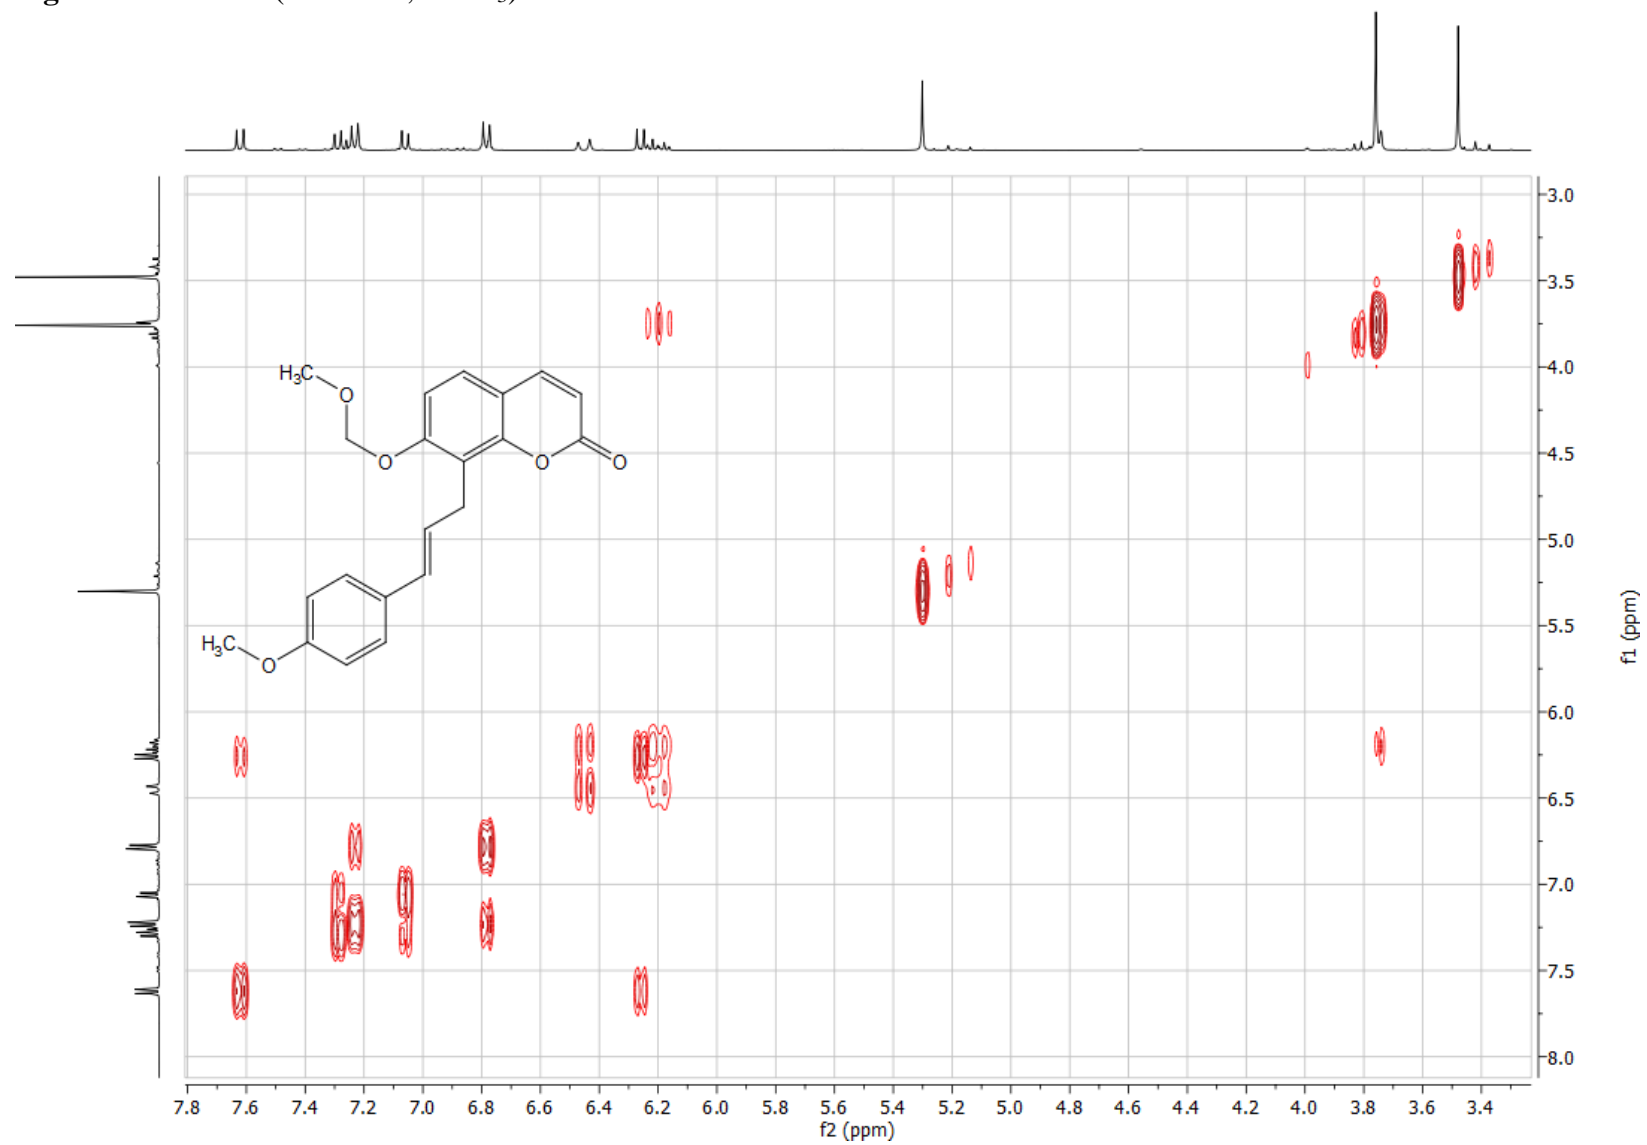

Figure S37: HSQC (400/100 MHz, CDCl<sub>3</sub>) of **12af**

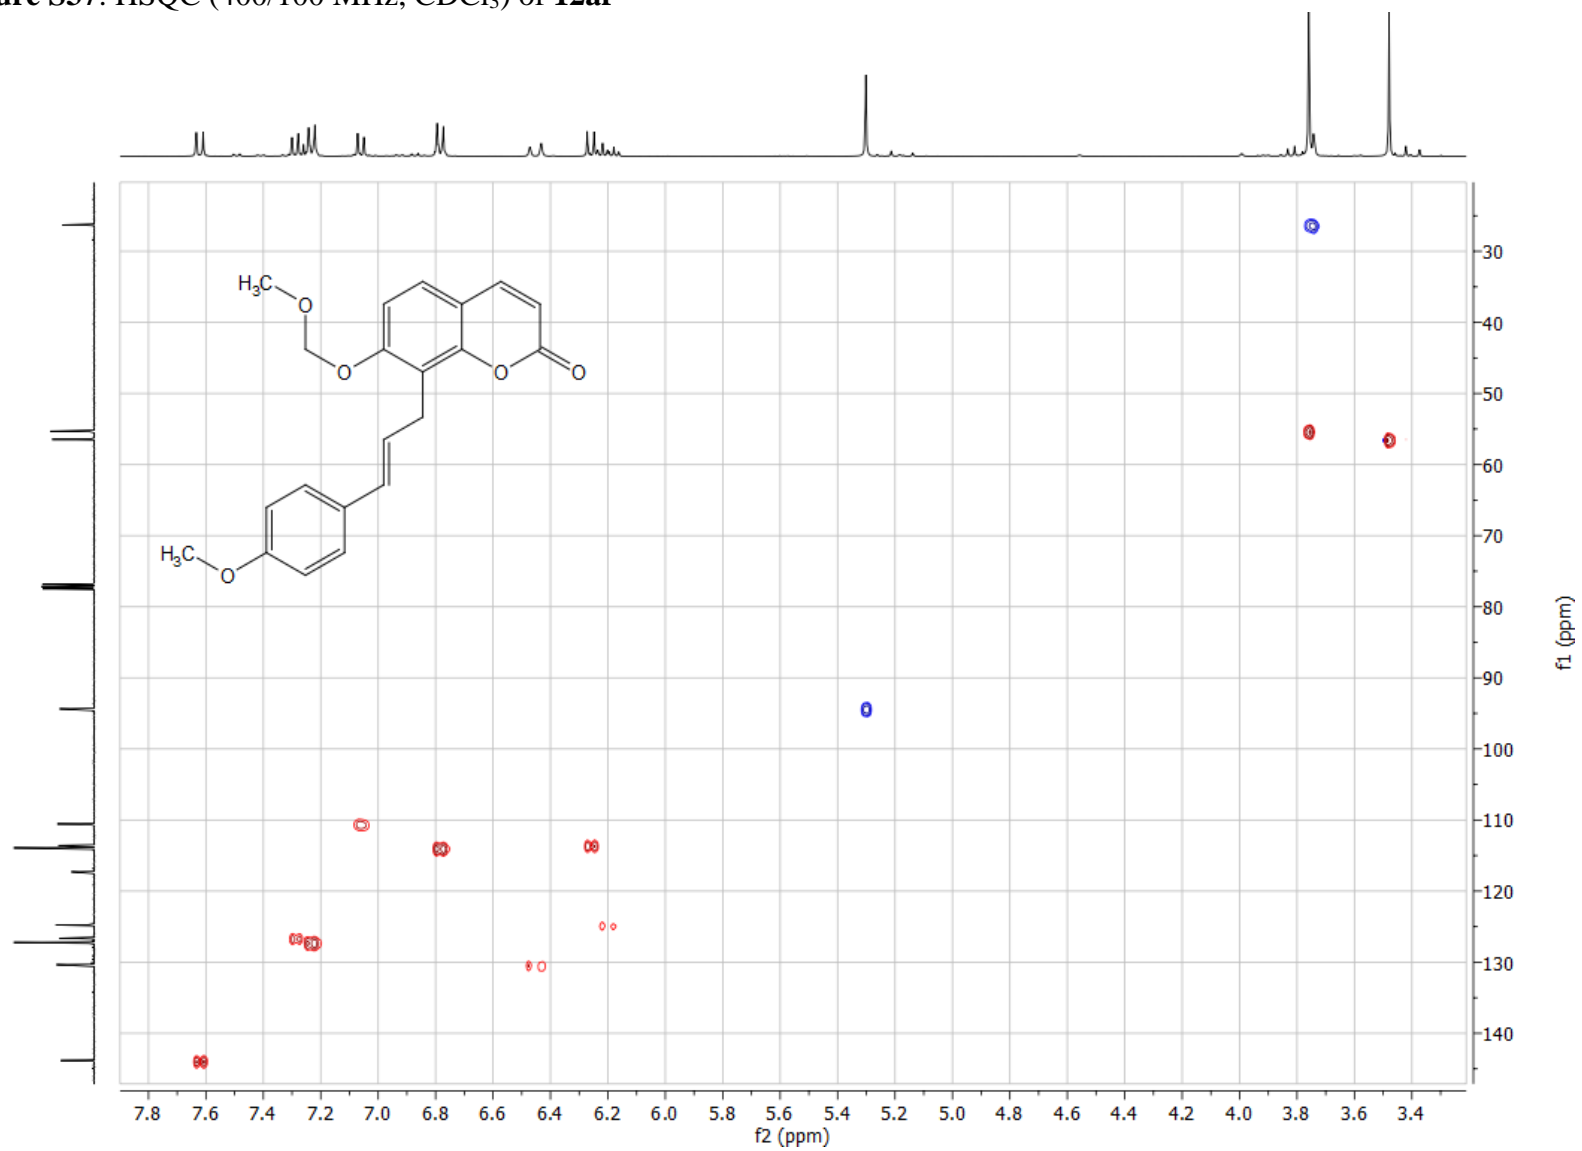



Figure S38: HMBC (400/100 MHz, CDCl<sub>3</sub>) of 12af

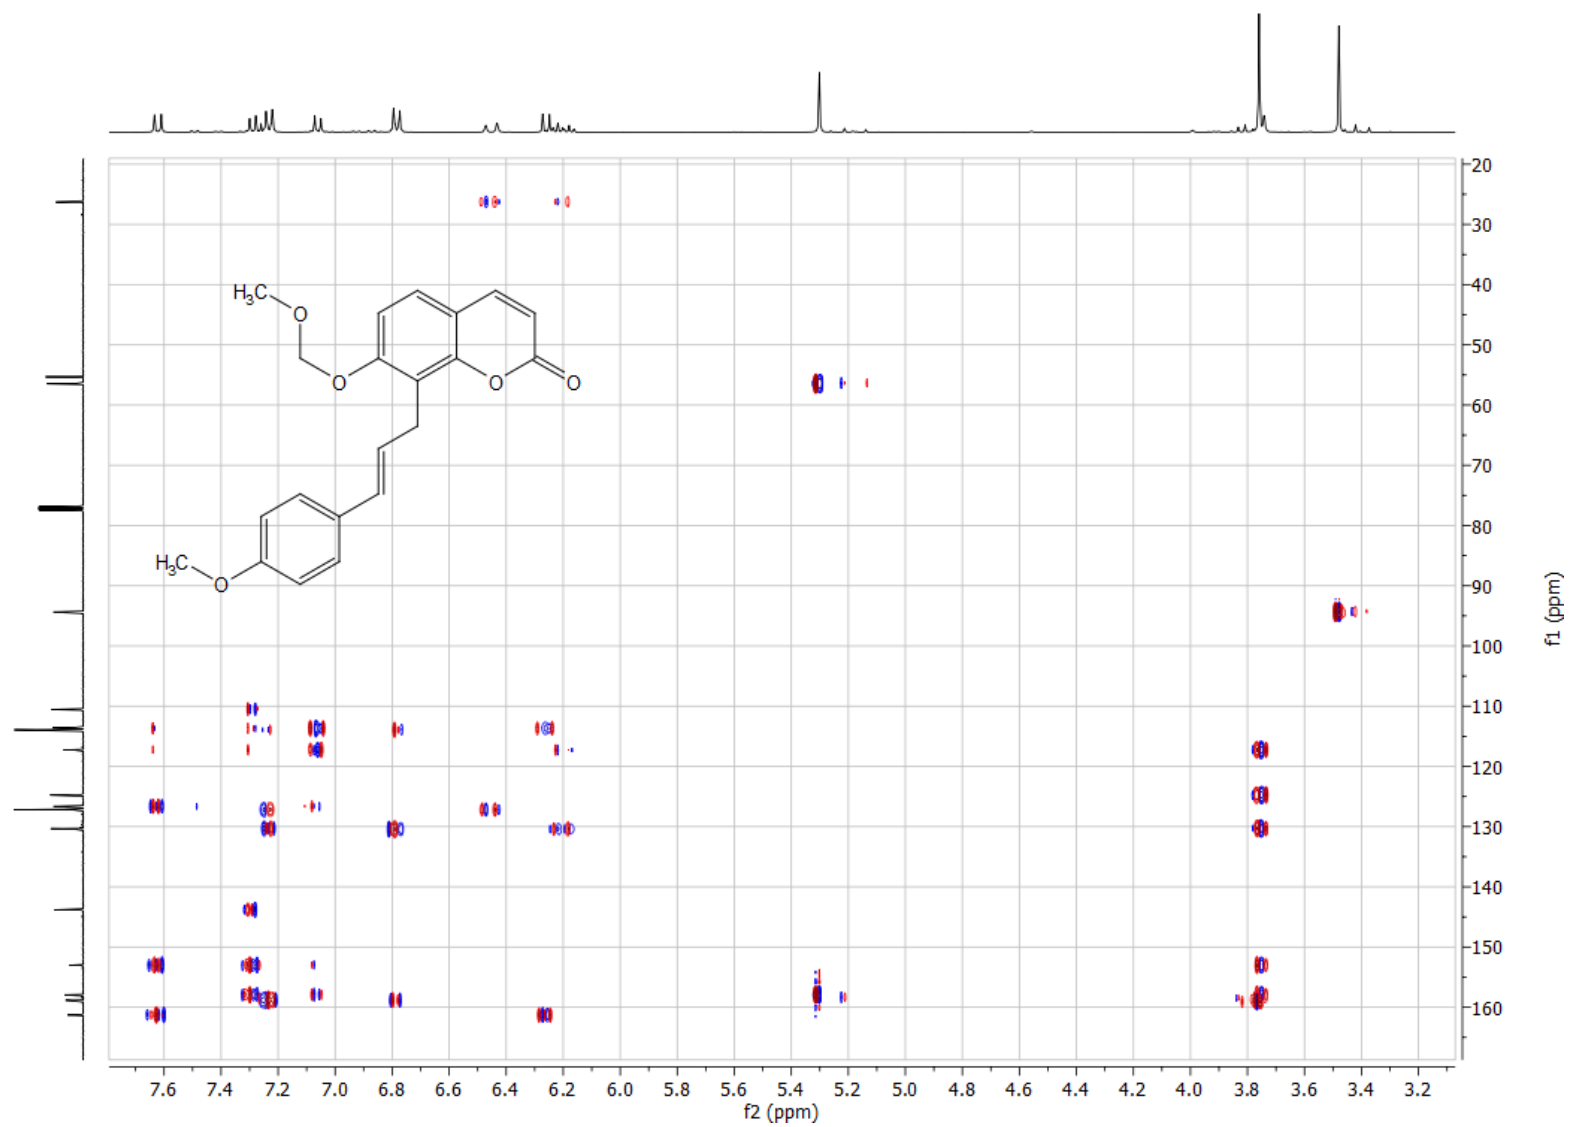

**Figure S39:** NOESY (400 MHz, CDCl<sub>3</sub>) of **12af**

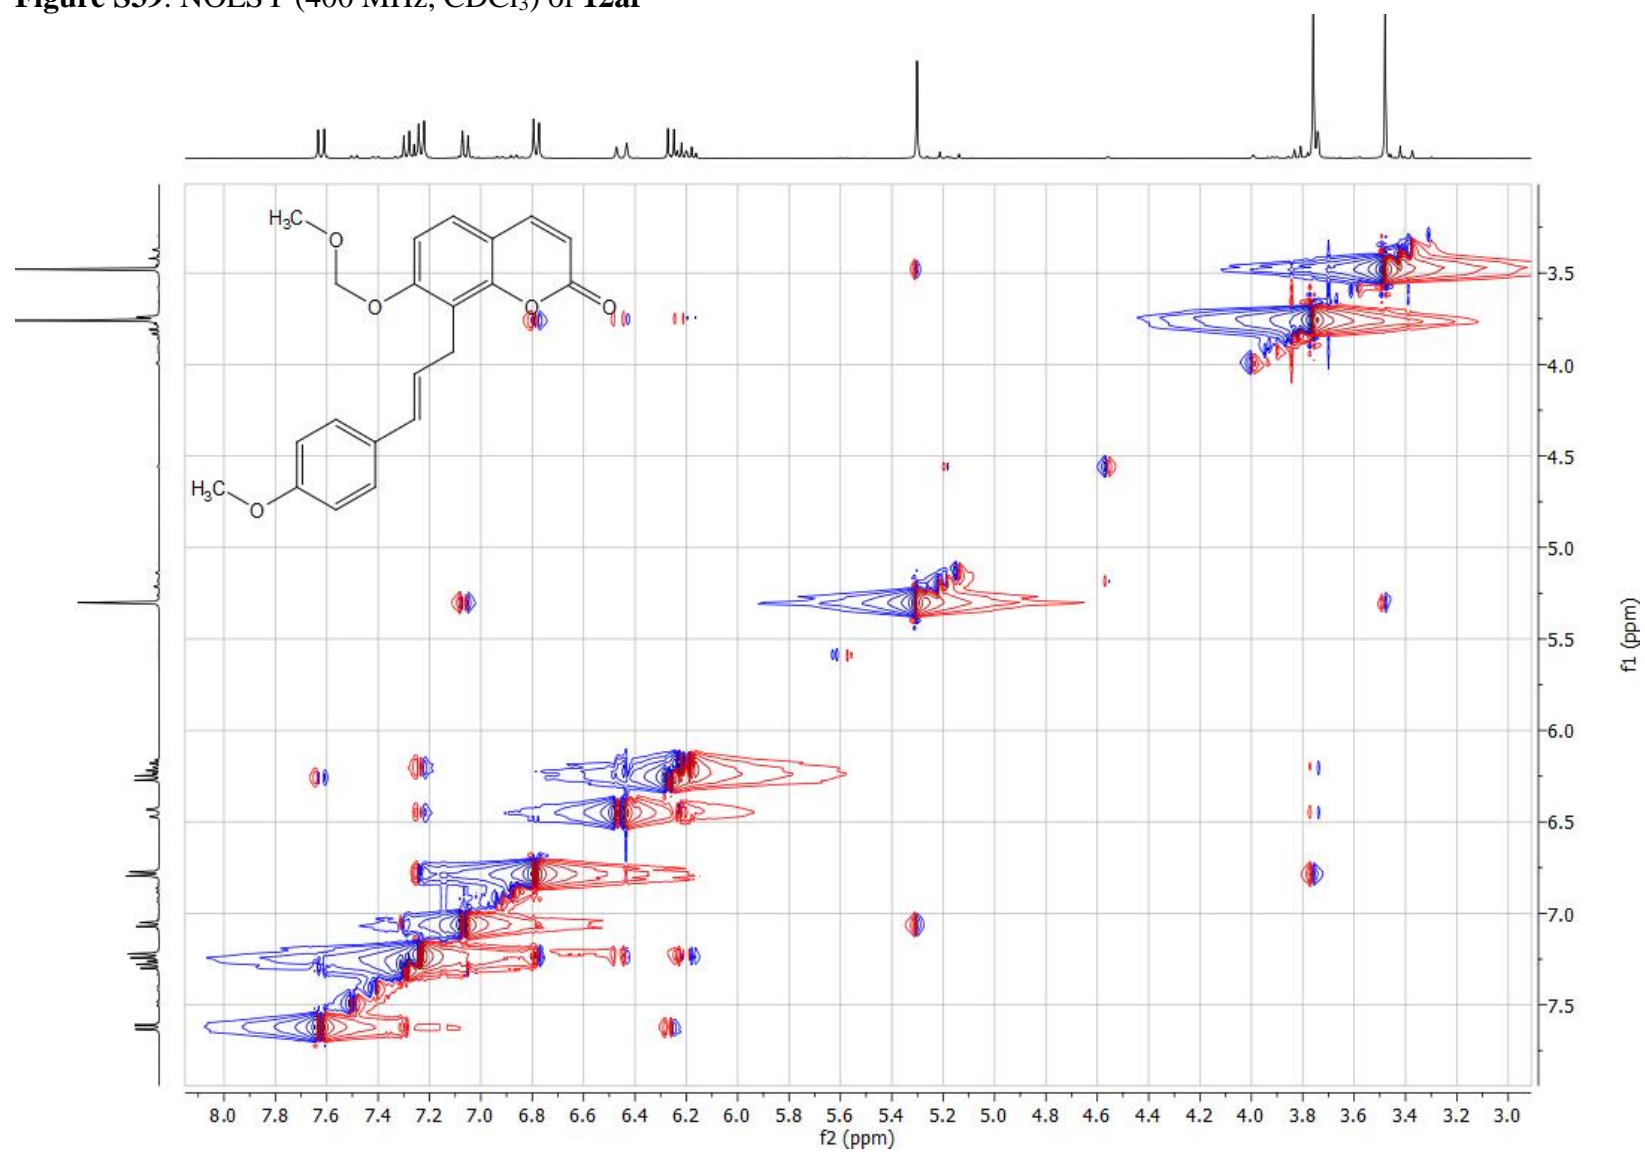

**Figure S40:**  $^1\text{H}$  NMR (400 MHz,  $\text{CDCl}_3$ ) of **12ag**

NEO400\_2023-1113\_mak.10.fid  
11g

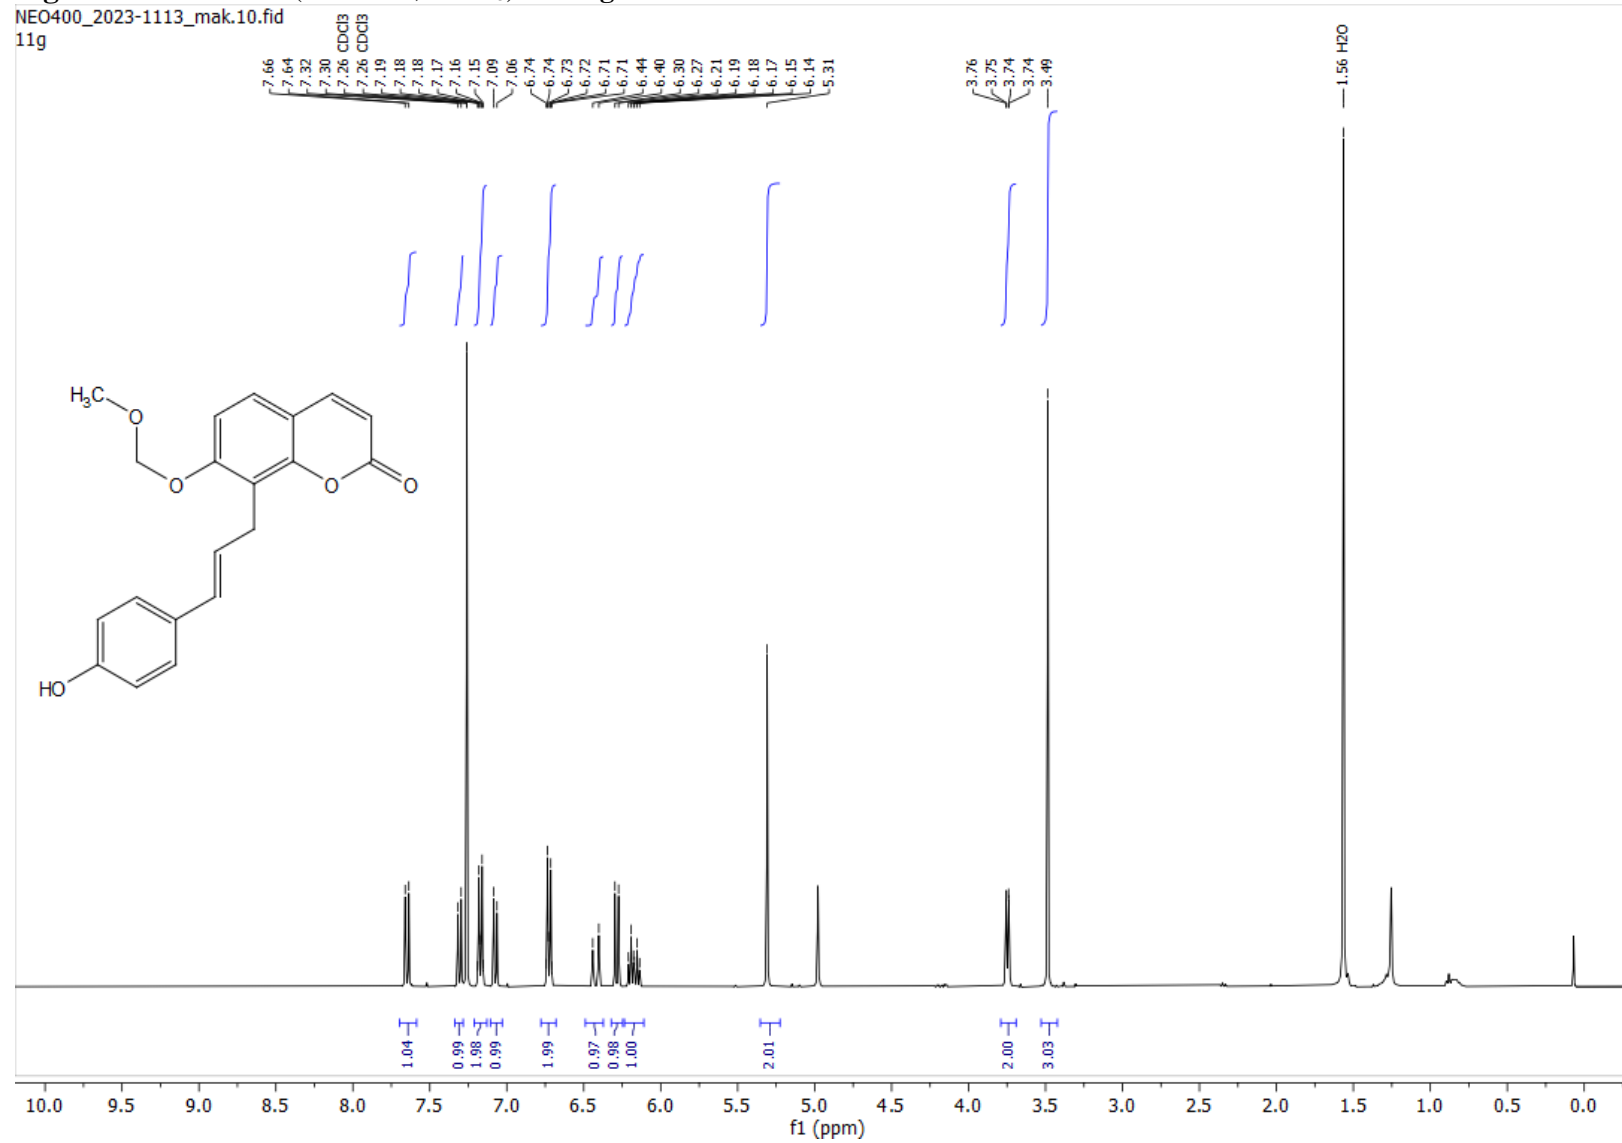

**Figure S41:**  $^{13}\text{C}\{^1\text{H}\}$  NMR (100 MHz,  $\text{CDCl}_3$ ) of **12ag**

NEO400\_2023-1019\_mak.11.fid  
11g

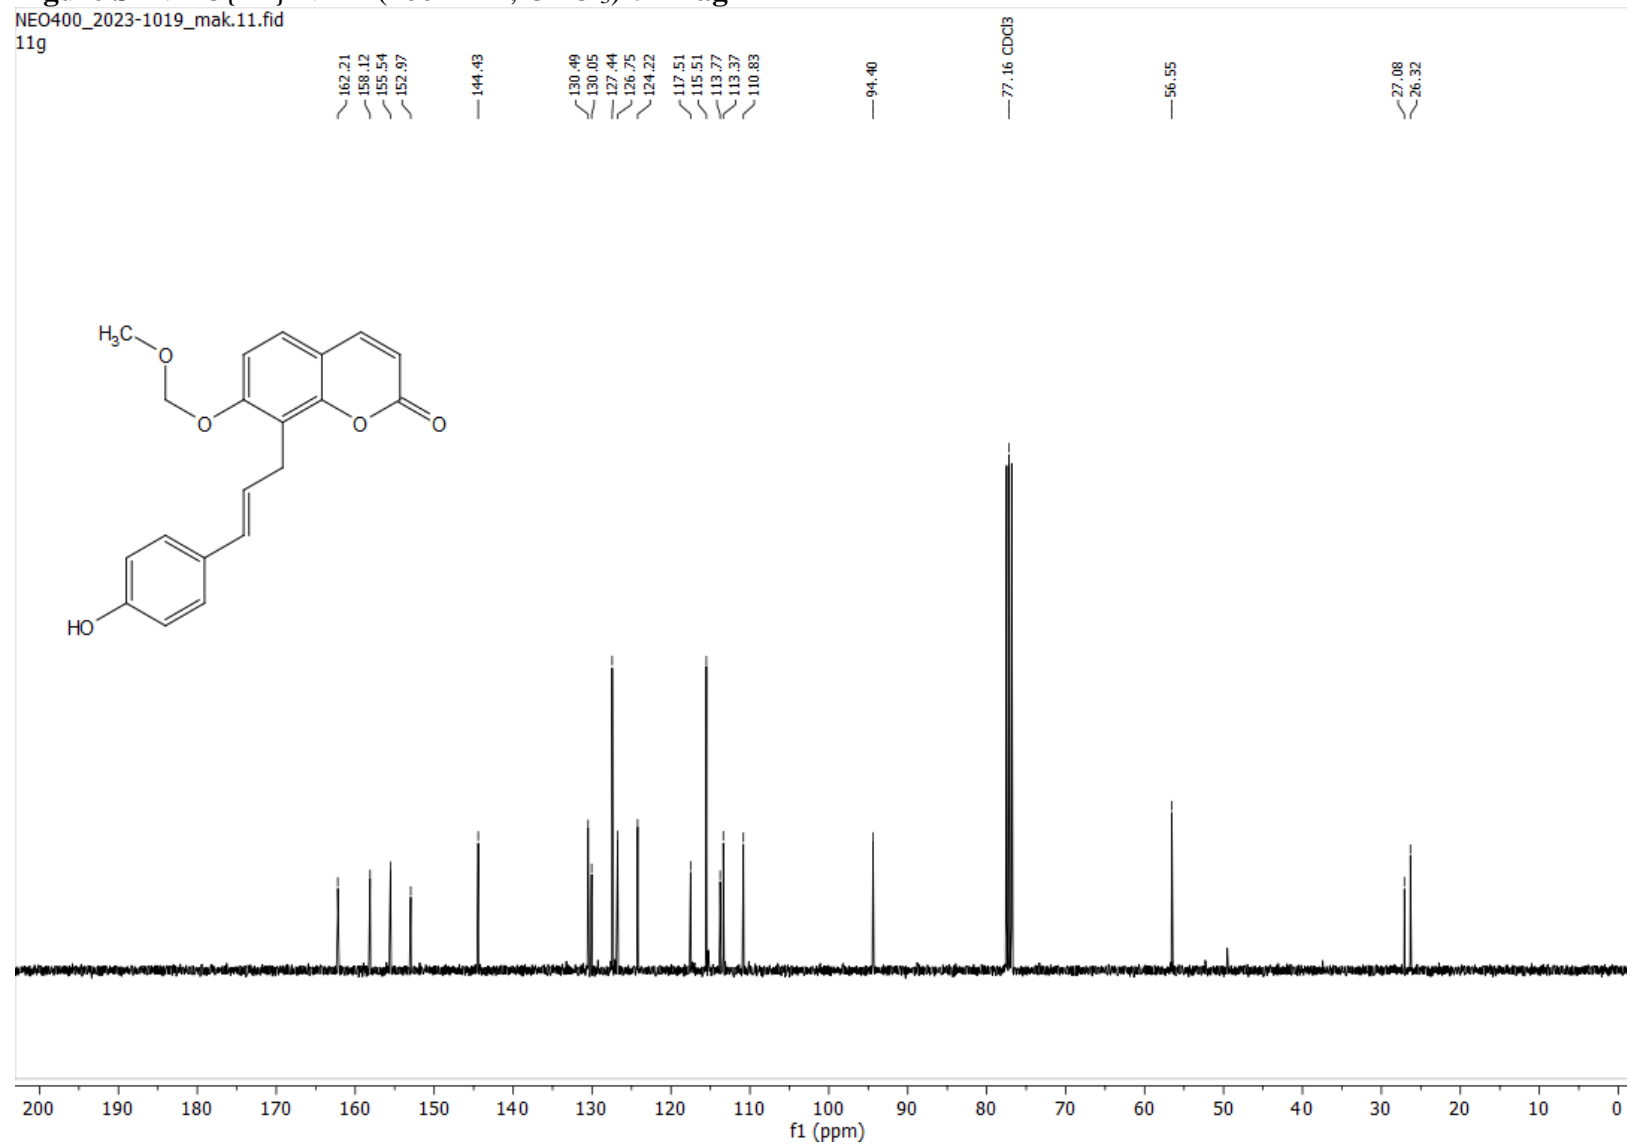

**Figure S42:**  $^1\text{H}$  NMR (400 MHz,  $\text{CDCl}_3$ ) of **12ah**

NEO400\_2022-1215\_mak.10.fid  
661sf2-4

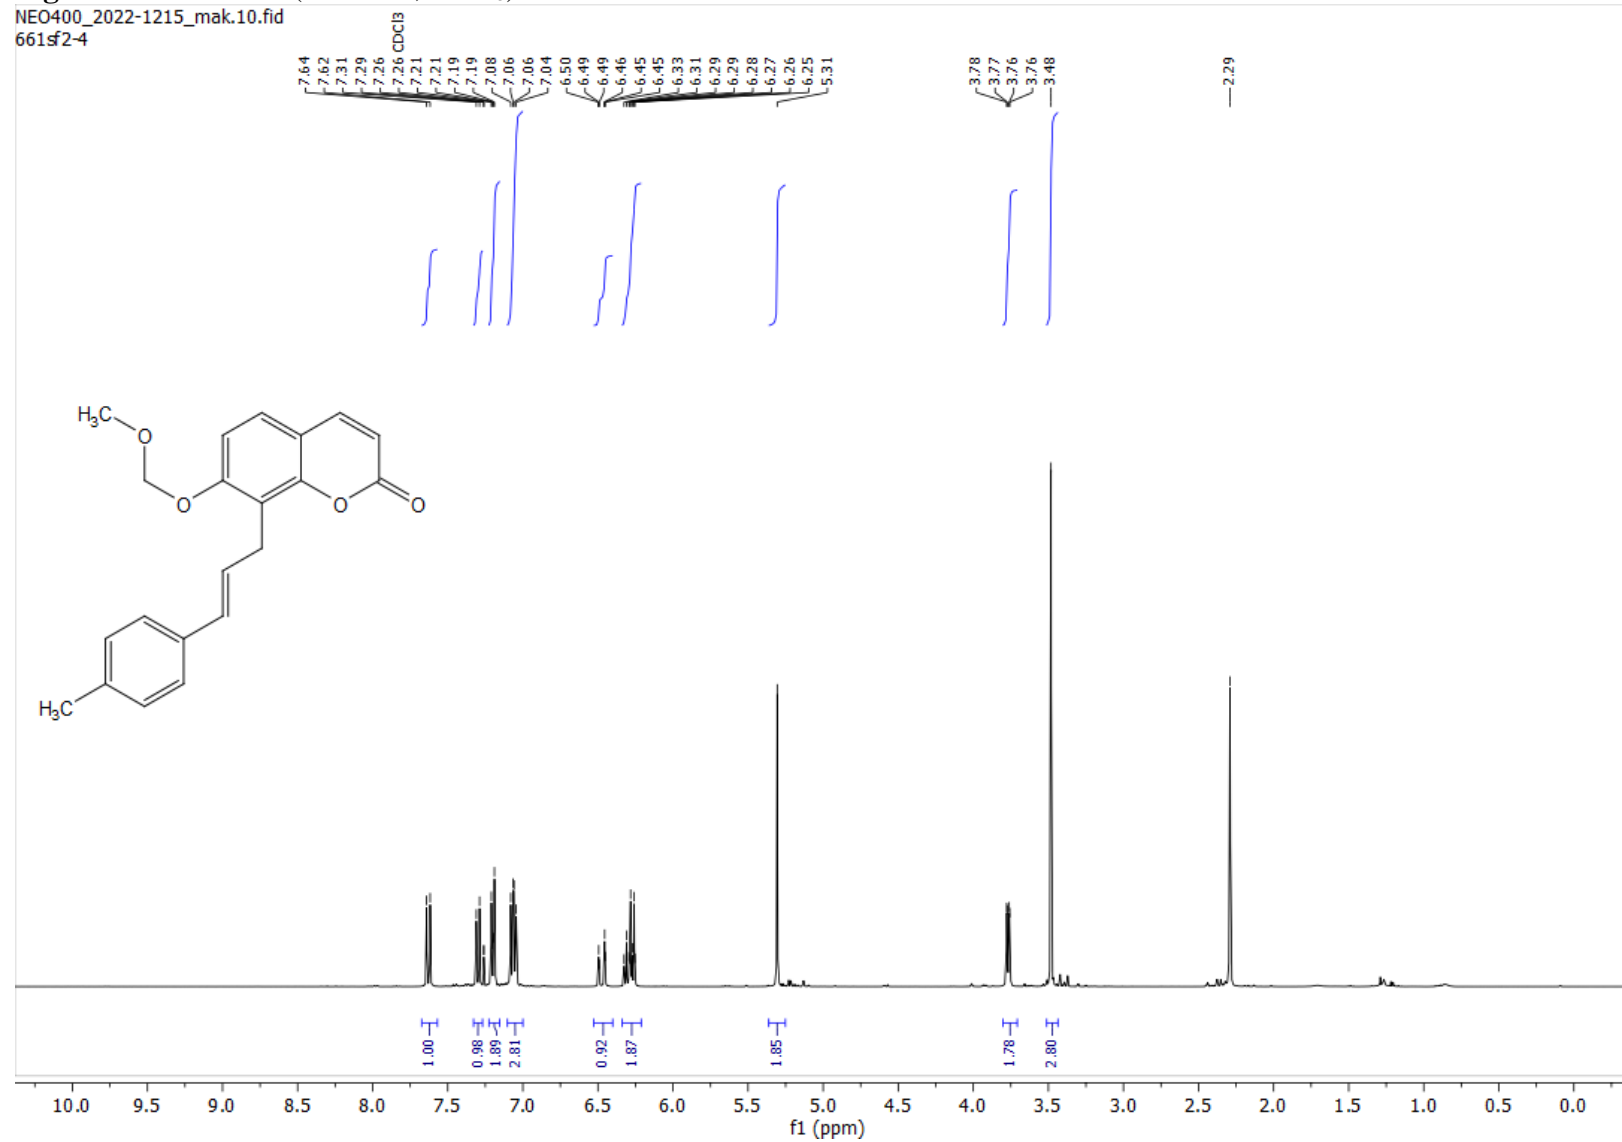

**Figure S43:**  $^{13}\text{C}\{^1\text{H}\}$  NMR (100 MHz,  $\text{CDCl}_3$ ) of **12ah**

NEO400\_2022-1215\_mak.11.fid  
661sf2-4

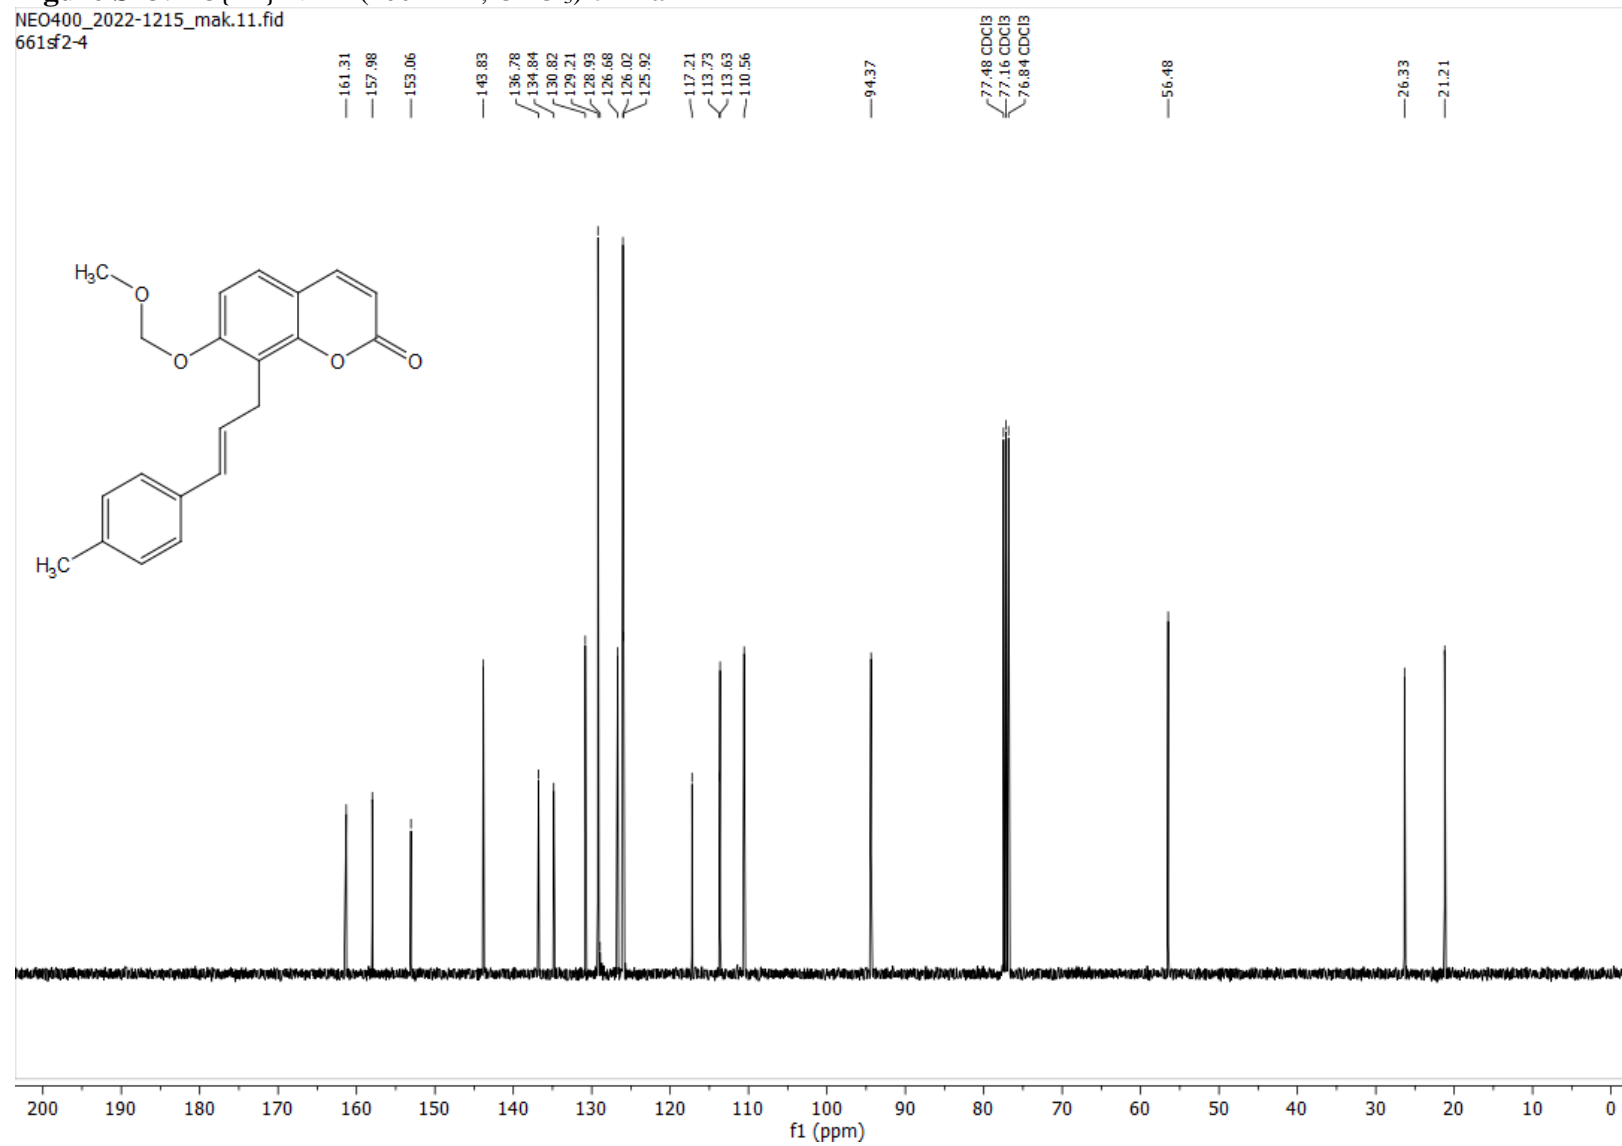

Figure S44: COSY (400 MHz, CDCl<sub>3</sub>) of 12ah

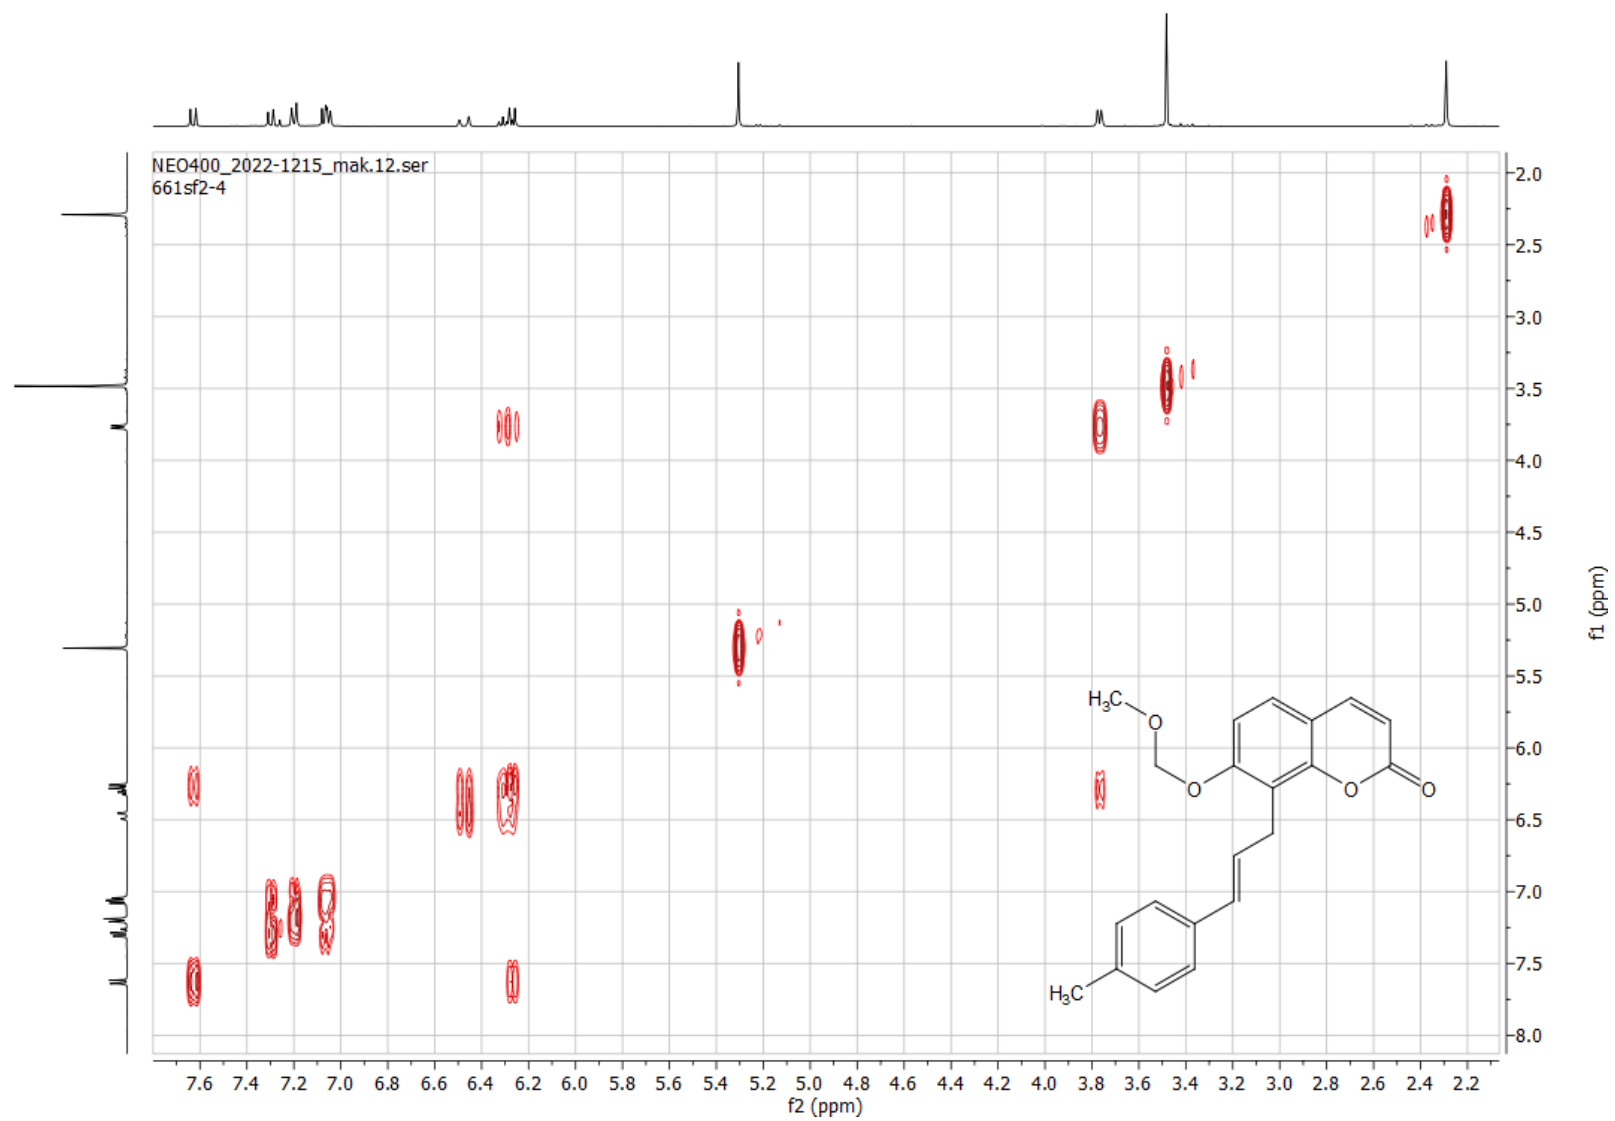

Figure S45: HSQC (400/100 MHz, CDCl<sub>3</sub>) of **12ah**

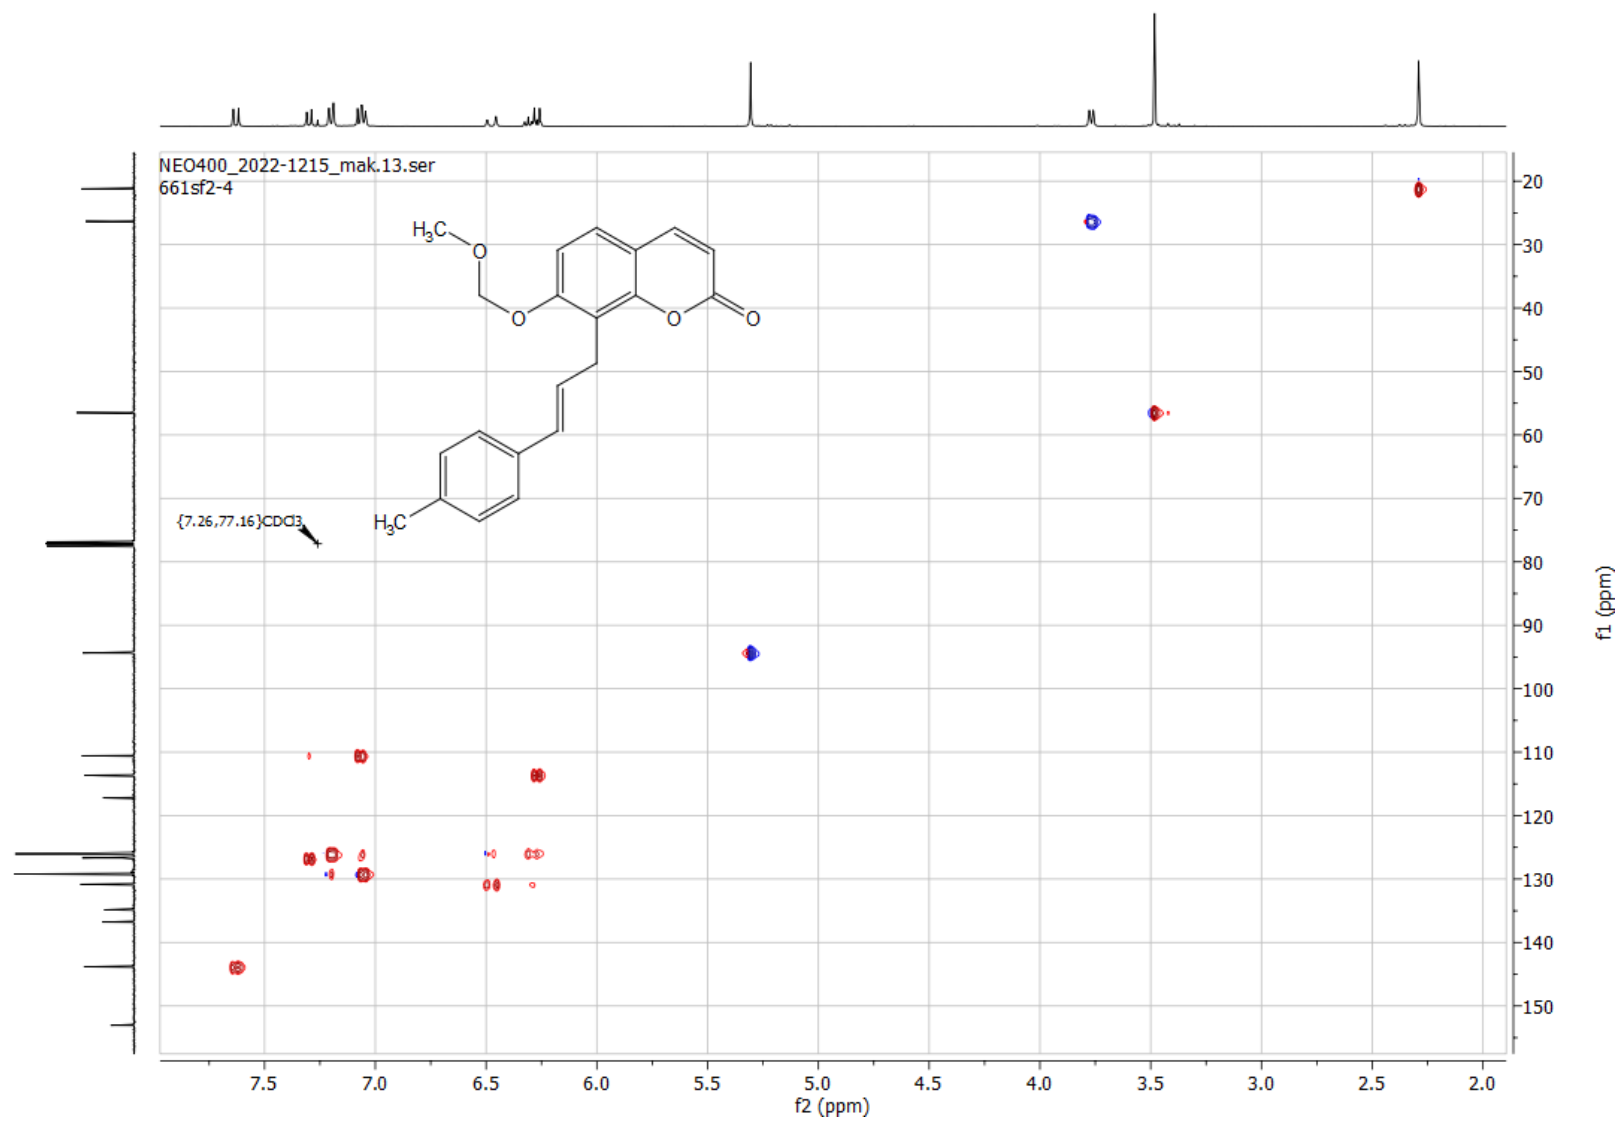



Figure S46: HMBC (400/100 MHz, CDCl<sub>3</sub>) of 12ah

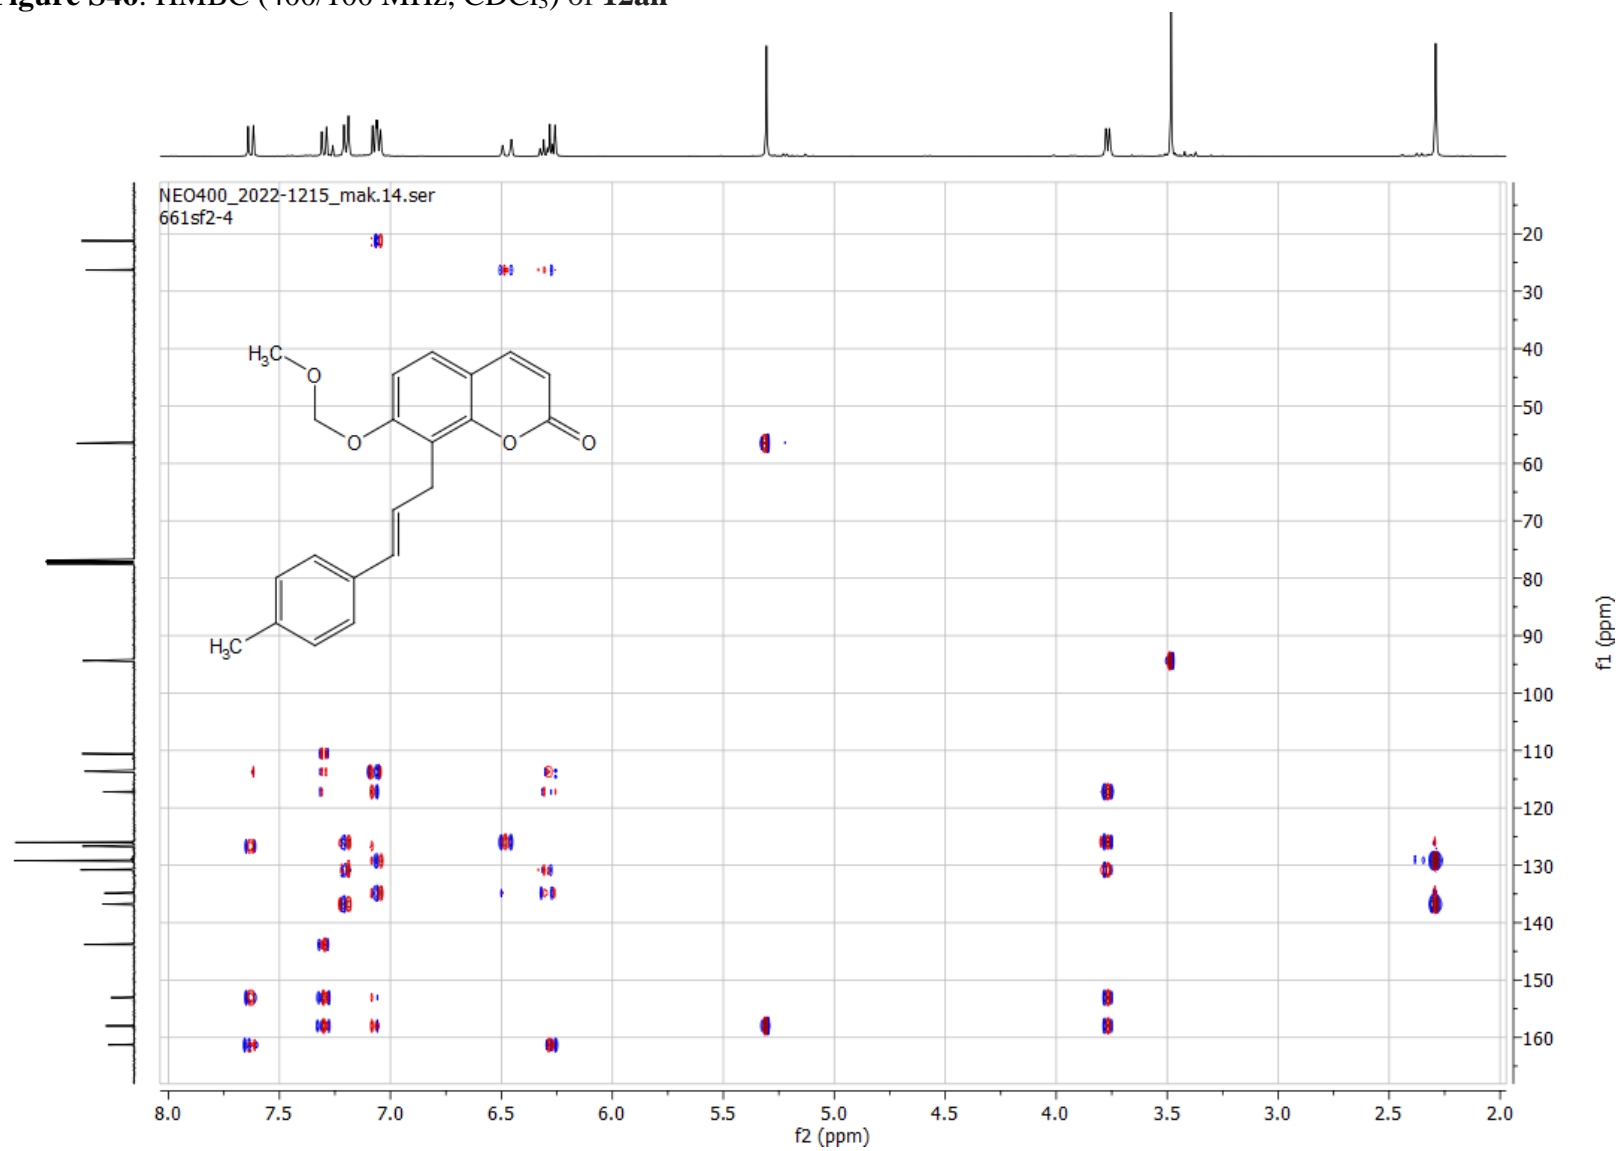

**Figure S47:** NOESY (400 MHz, CDCl<sub>3</sub>) of **12ah**

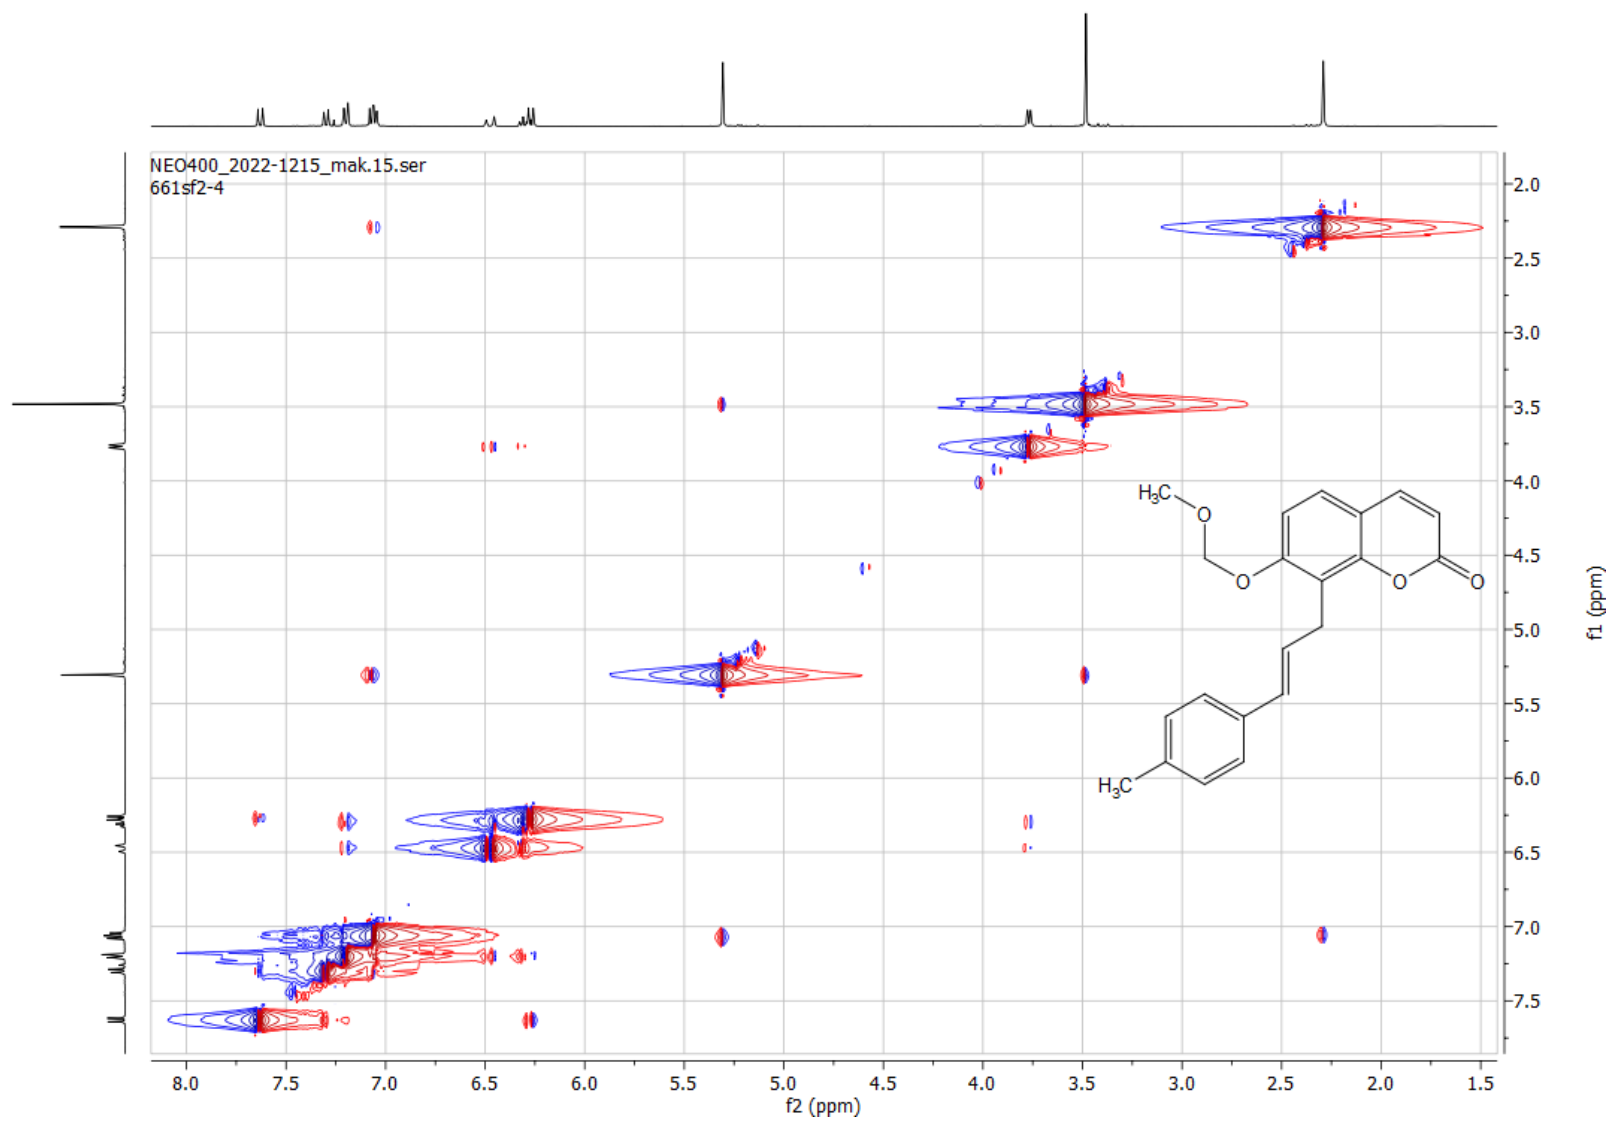

**Figure S48:**  $^1\text{H}$  NMR (400 MHz,  $\text{CDCl}_3$ ) of **12ai**

NEO400\_2022-1201\_mak.10.fid  
668s (Automat)

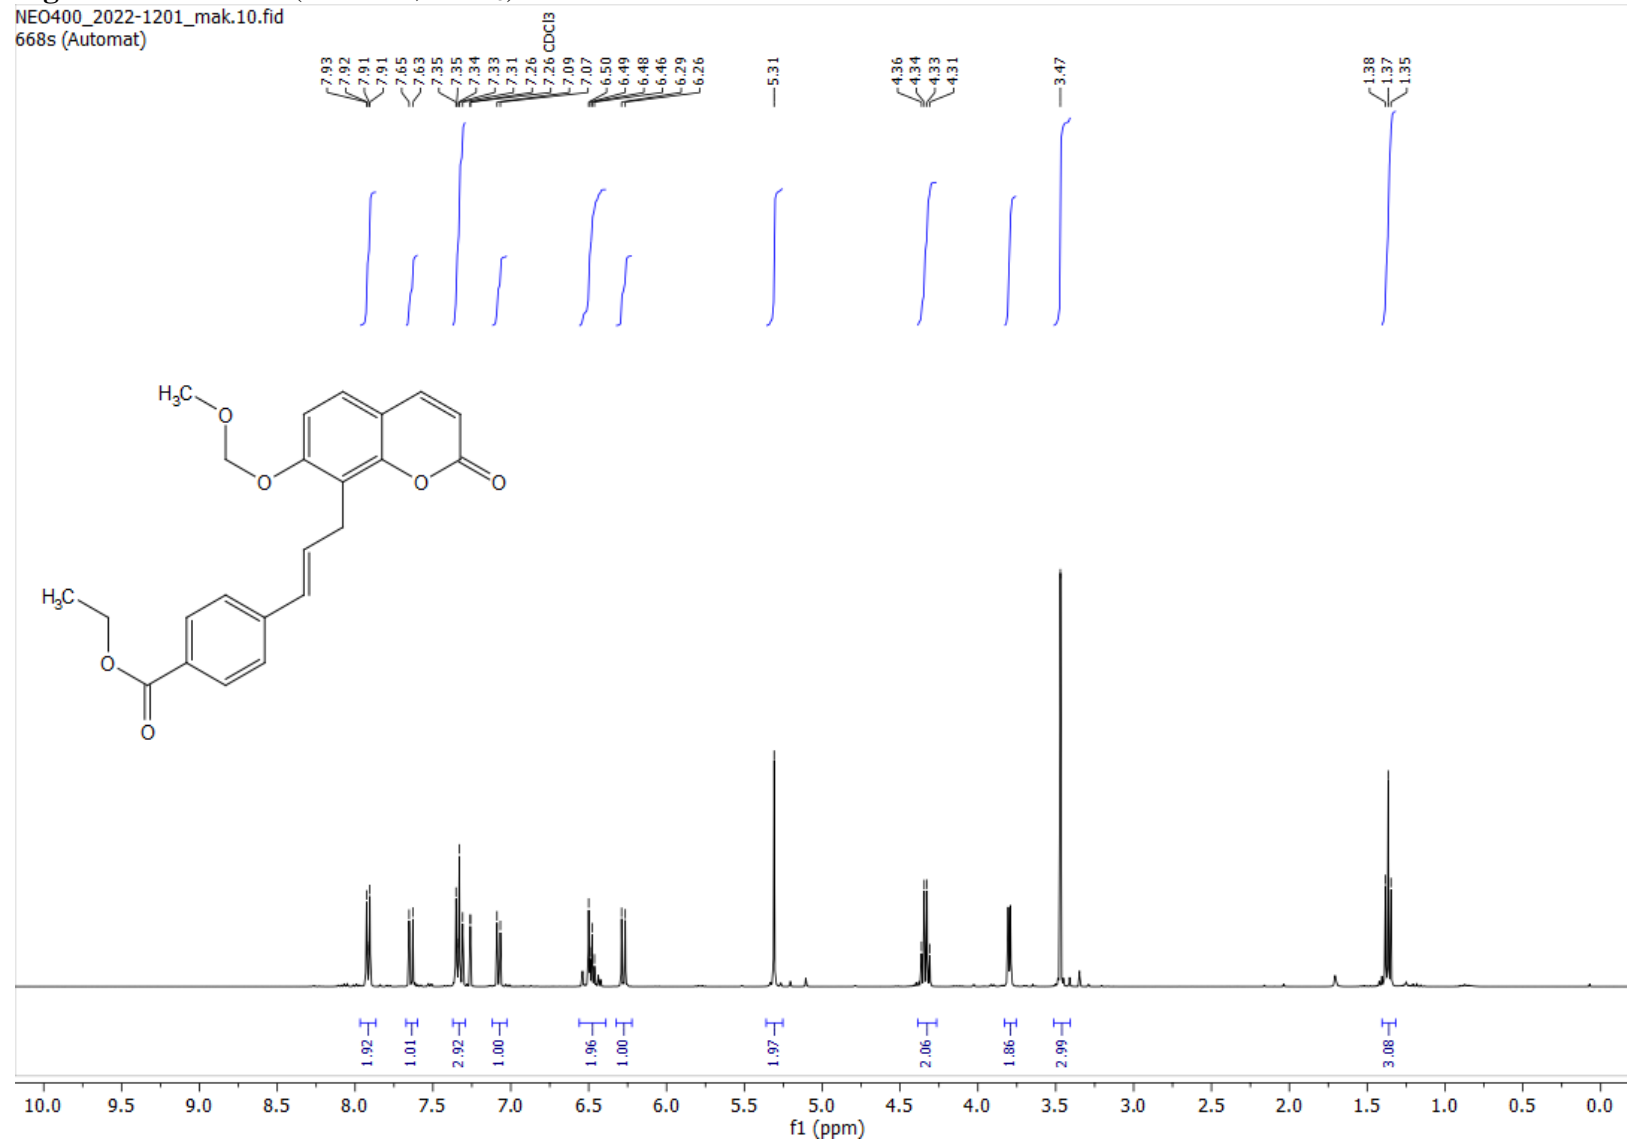

Figure S49:  $^{13}\text{C}\{^1\text{H}\}$  NMR (100 MHz,  $\text{CDCl}_3$ ) of 12ai

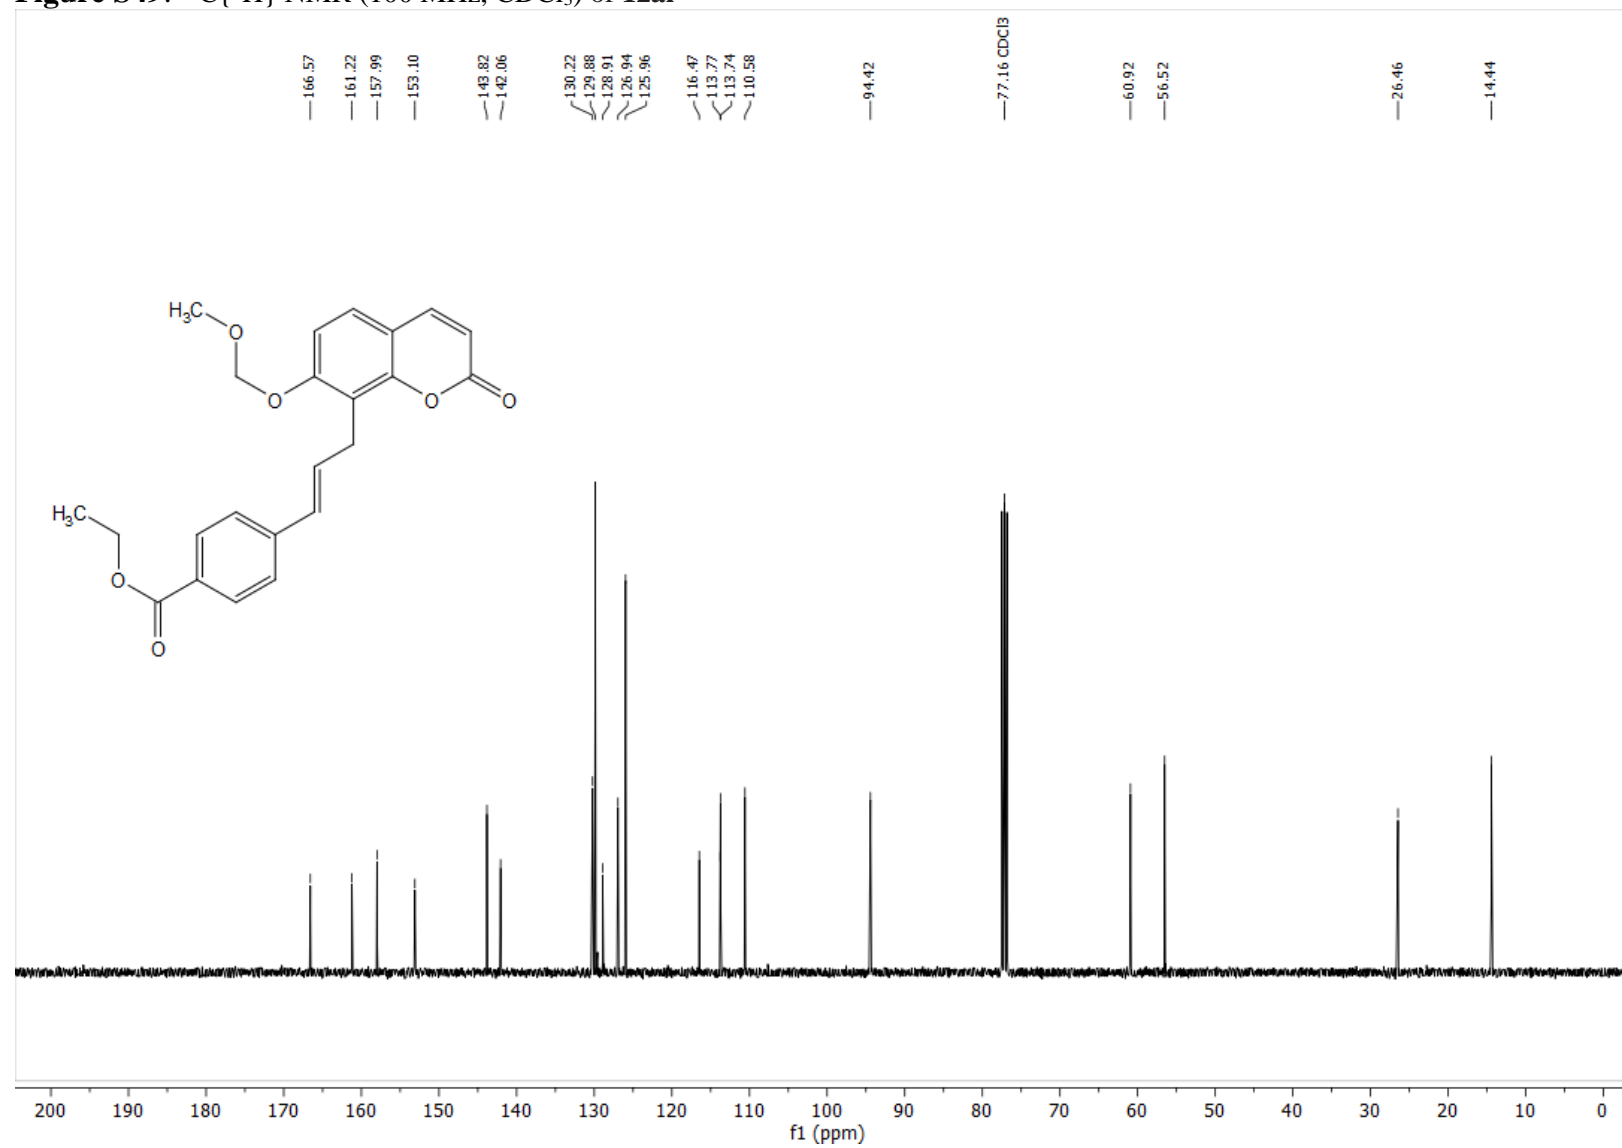

Figure S50: COSY (400 MHz, CDCl<sub>3</sub>) of 12ai

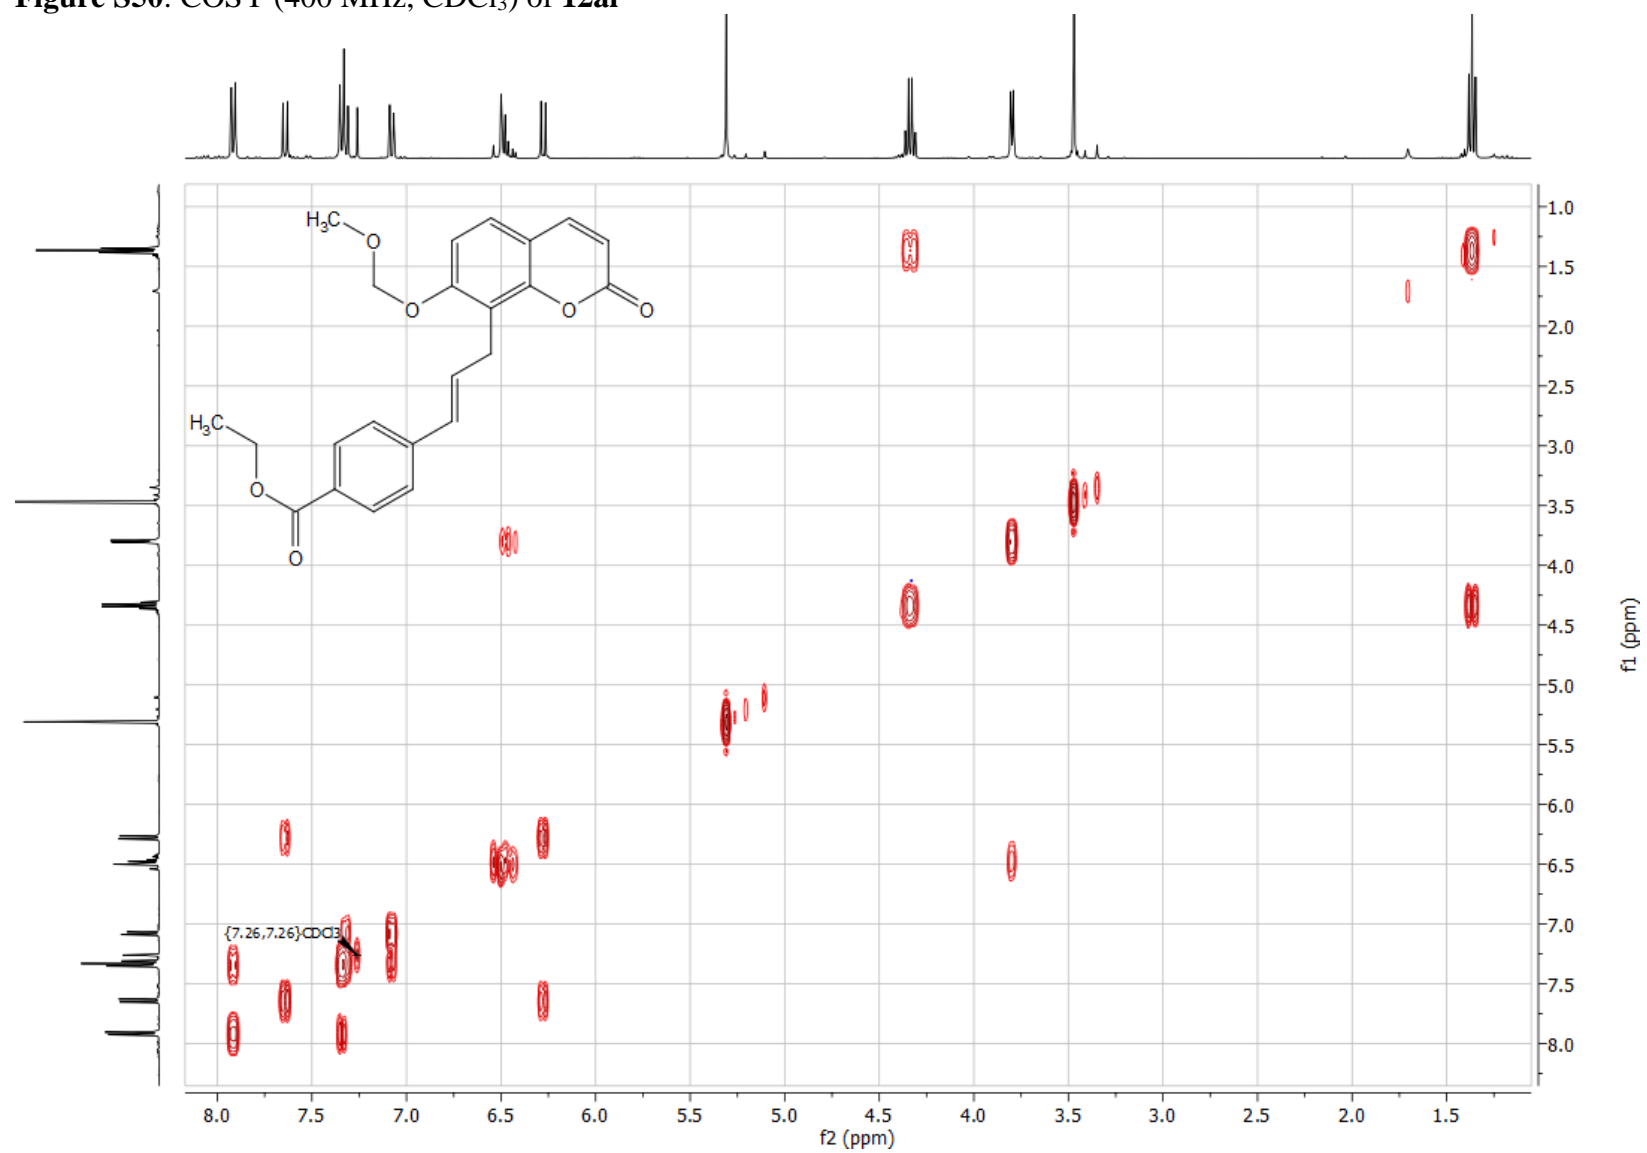

**Figure S51:** HSQC (400/100 MHz, CDCl<sub>3</sub>) of **12ai**

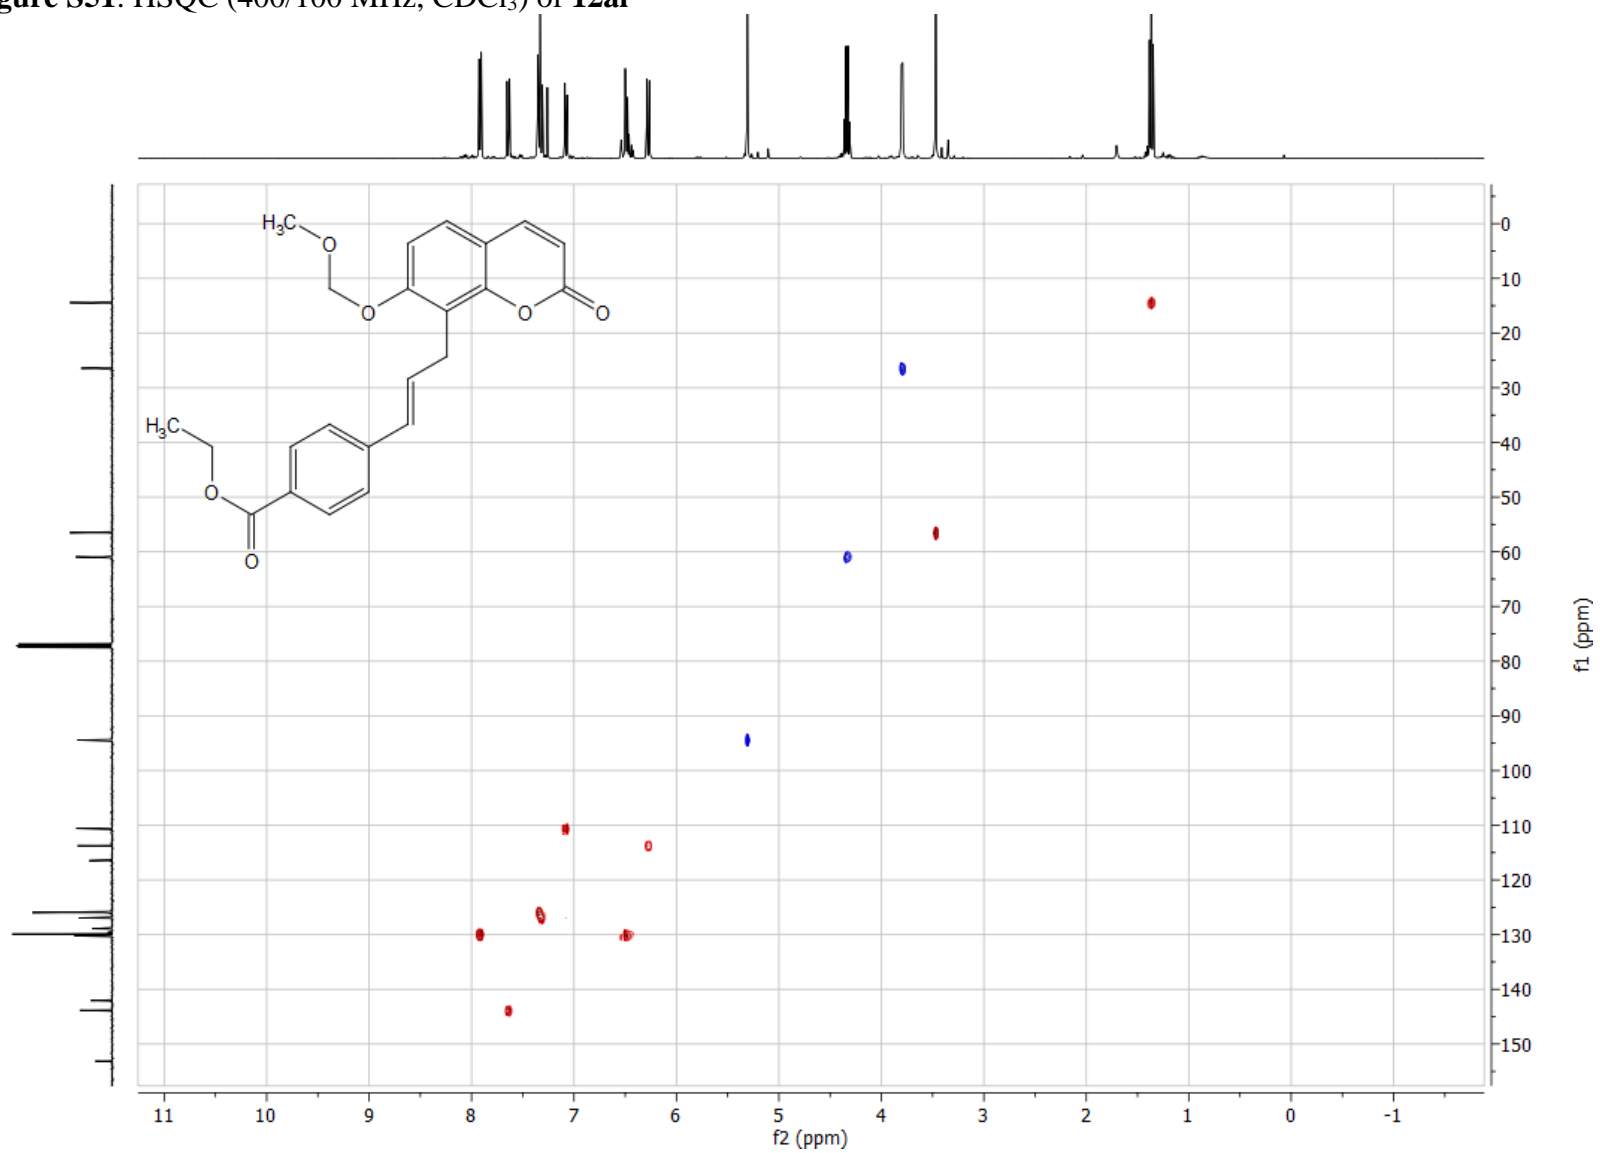

Figure S52: HMBC (400/100 MHz, CDCl<sub>3</sub>) of 12ai

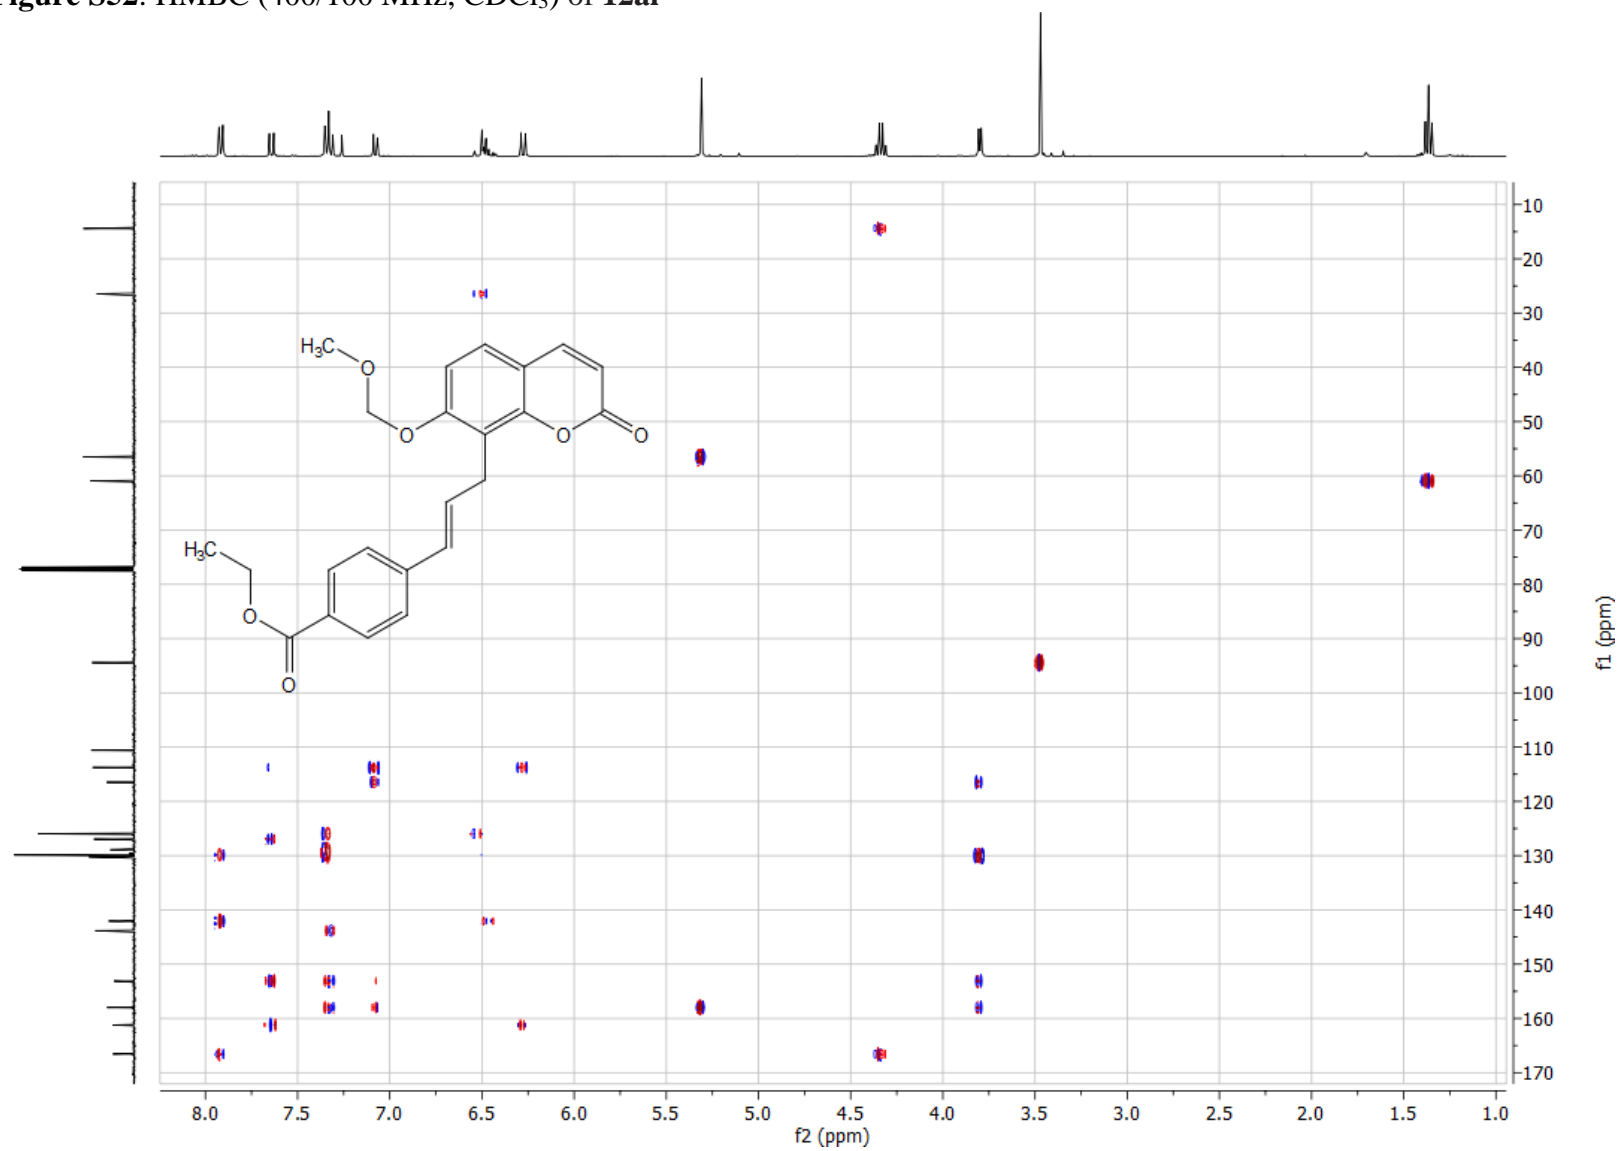

**Figure S53:** NOESY (400 MHz, CDCl<sub>3</sub>) of **12ai**

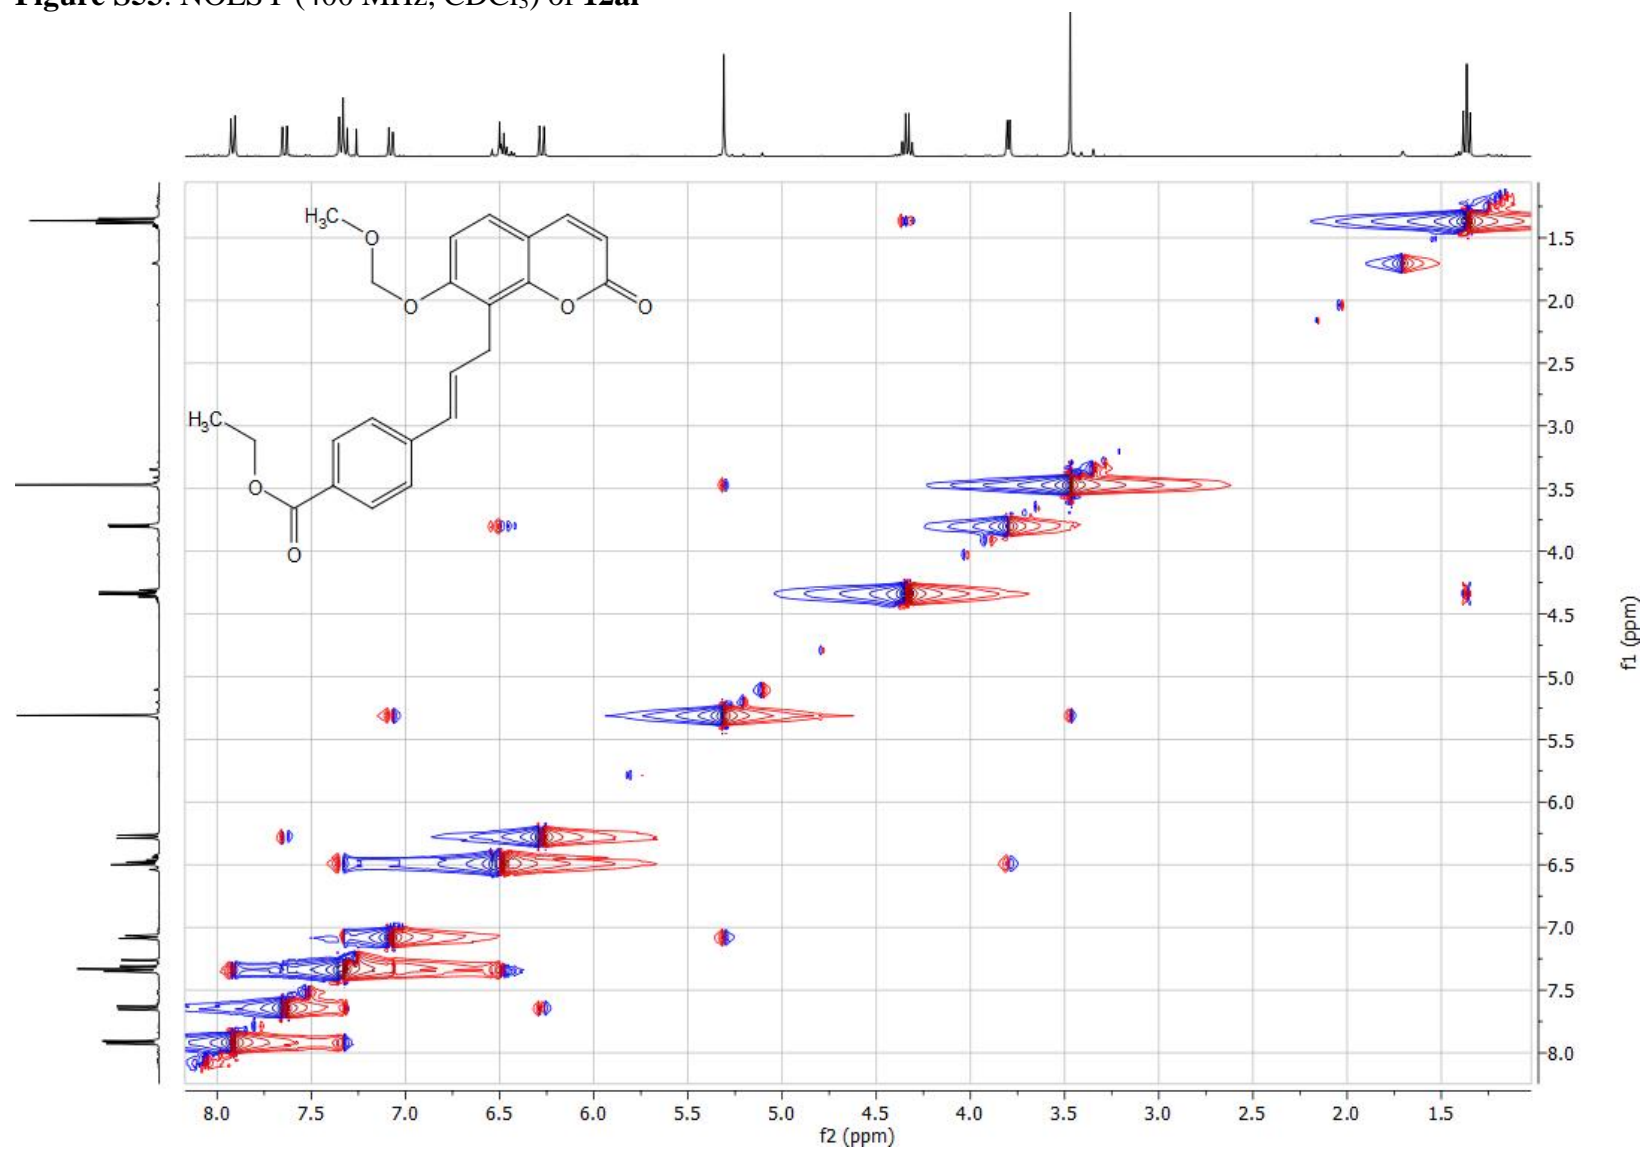



**Figure S54:**  $^1\text{H}$  NMR (400 MHz,  $\text{CDCl}_3$ ) of **12ak**

NEO400\_2023-0321\_mak.10.fid

11k

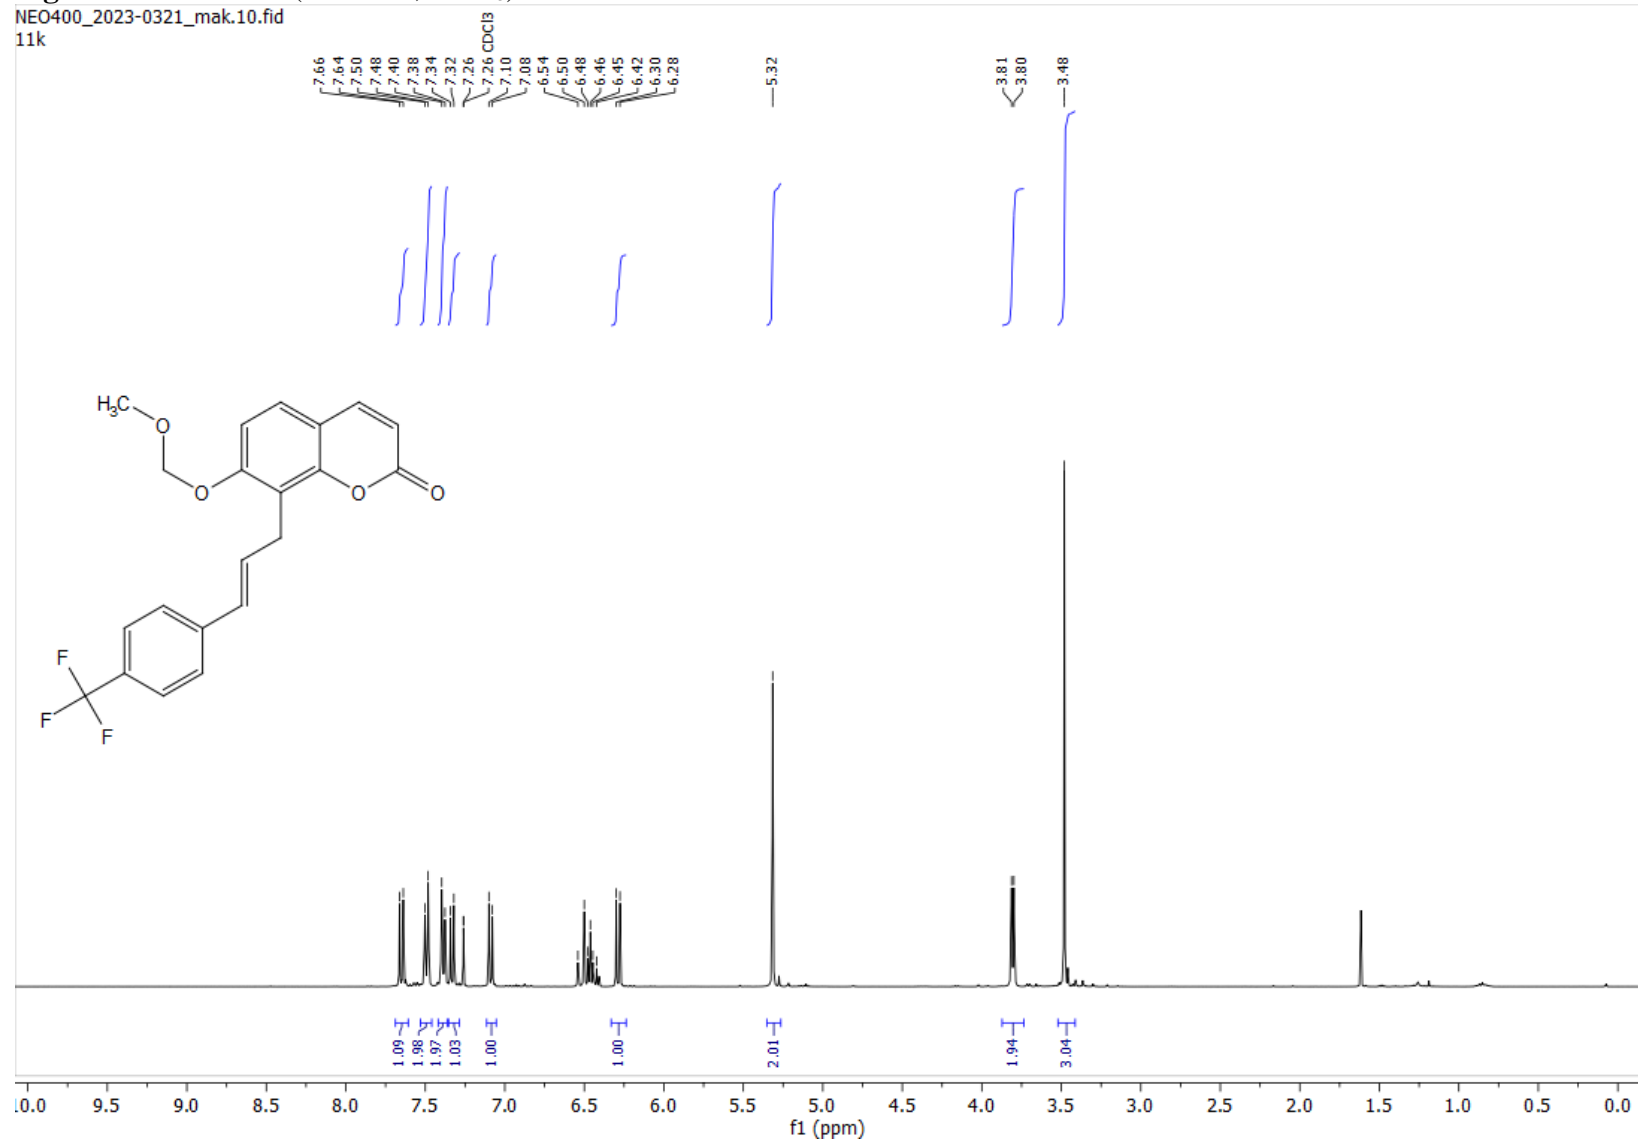

**Figure S55:**  $^{13}\text{C}\{^1\text{H}\}$  NMR (100 MHz,  $\text{CDCl}_3$ ) of **12ak**

NEO400\_2023-0321\_mak.11.fid

11k

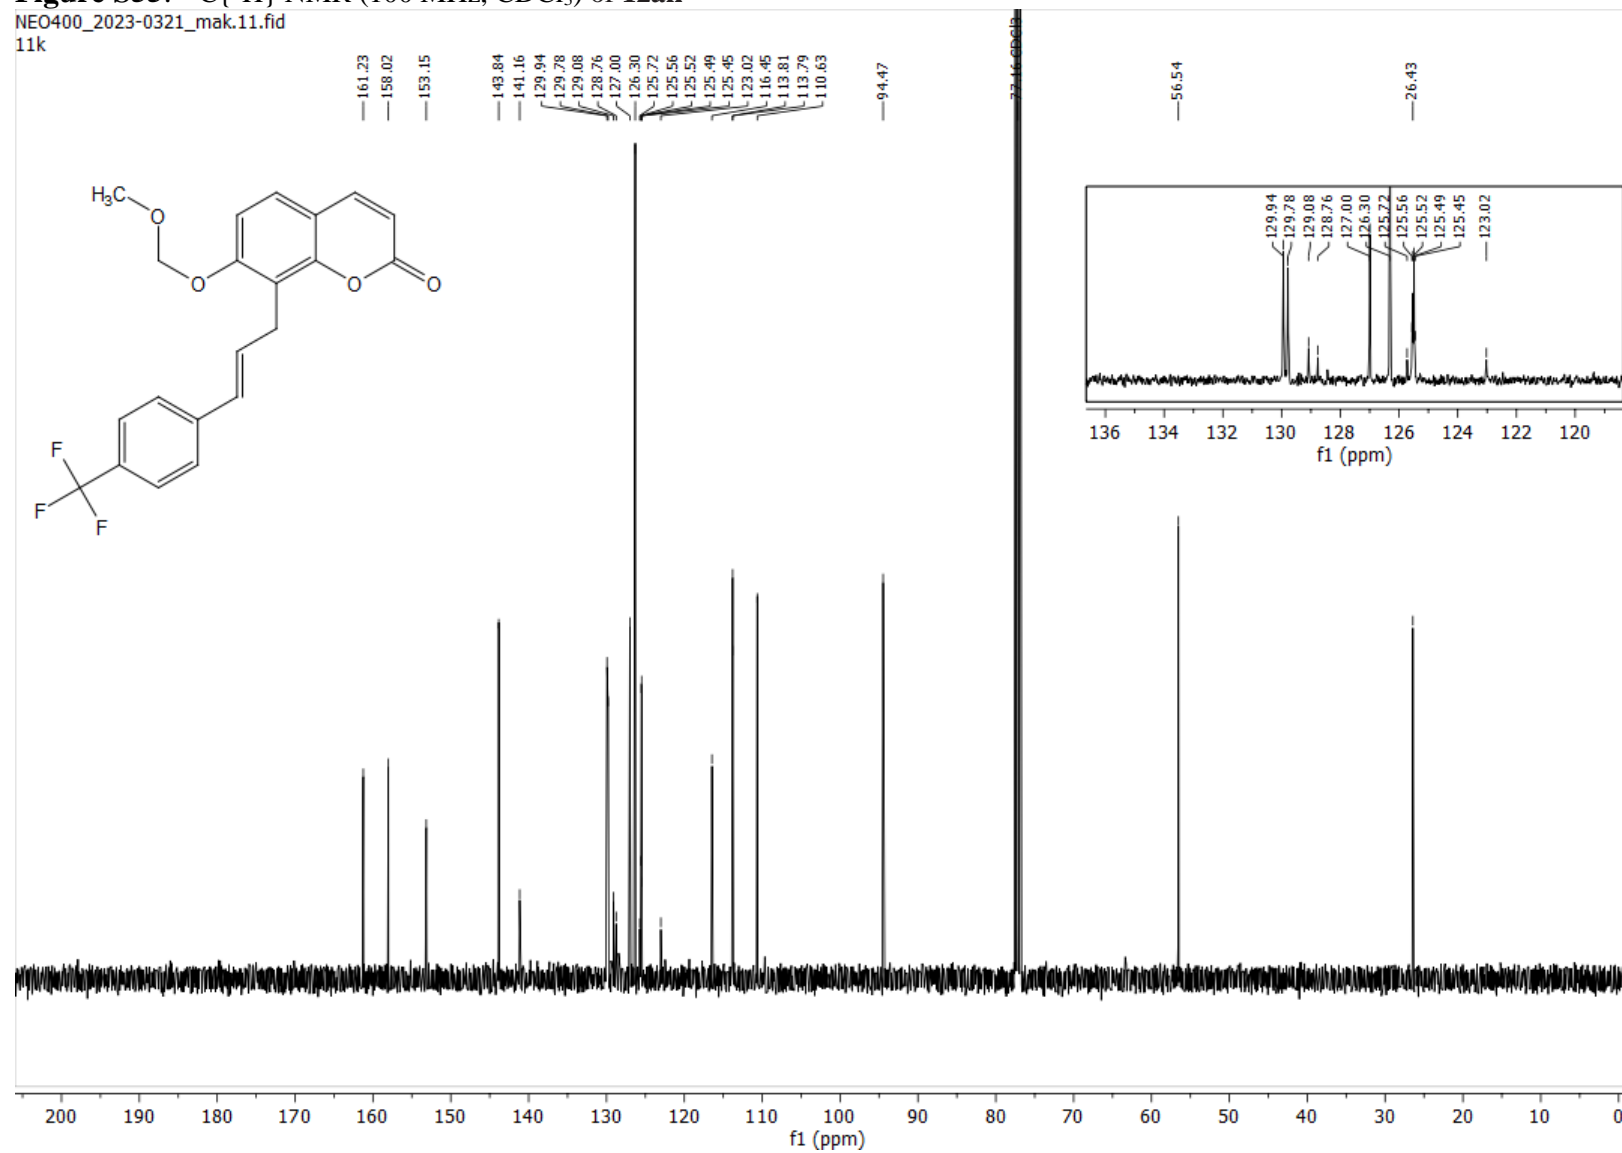

**Figure S56:**  $^1\text{H}$  NMR (400 MHz,  $\text{CDCl}_3$ ) of **12al**

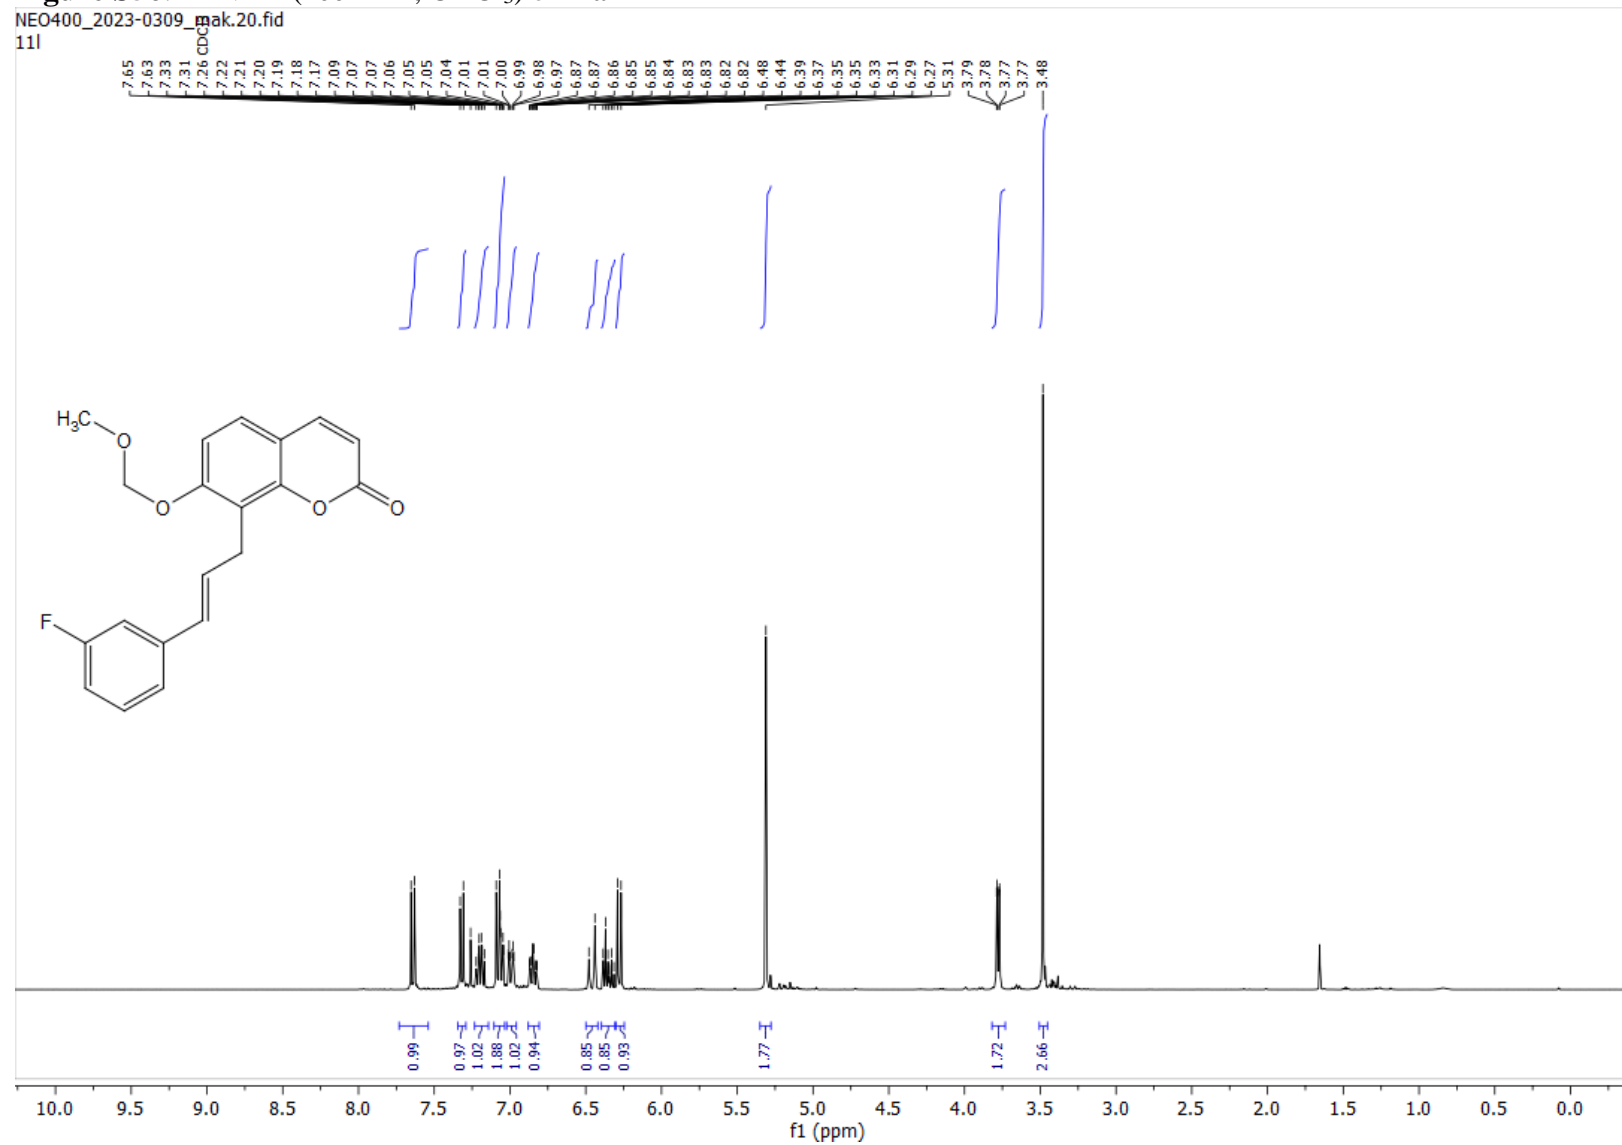

**Figure S57:**  $^{13}\text{C}\{^1\text{H}\}$  NMR (100 MHz,  $\text{CDCl}_3$ ) of **12al**

NEO400\_2023-0309\_mak.21.fid

111

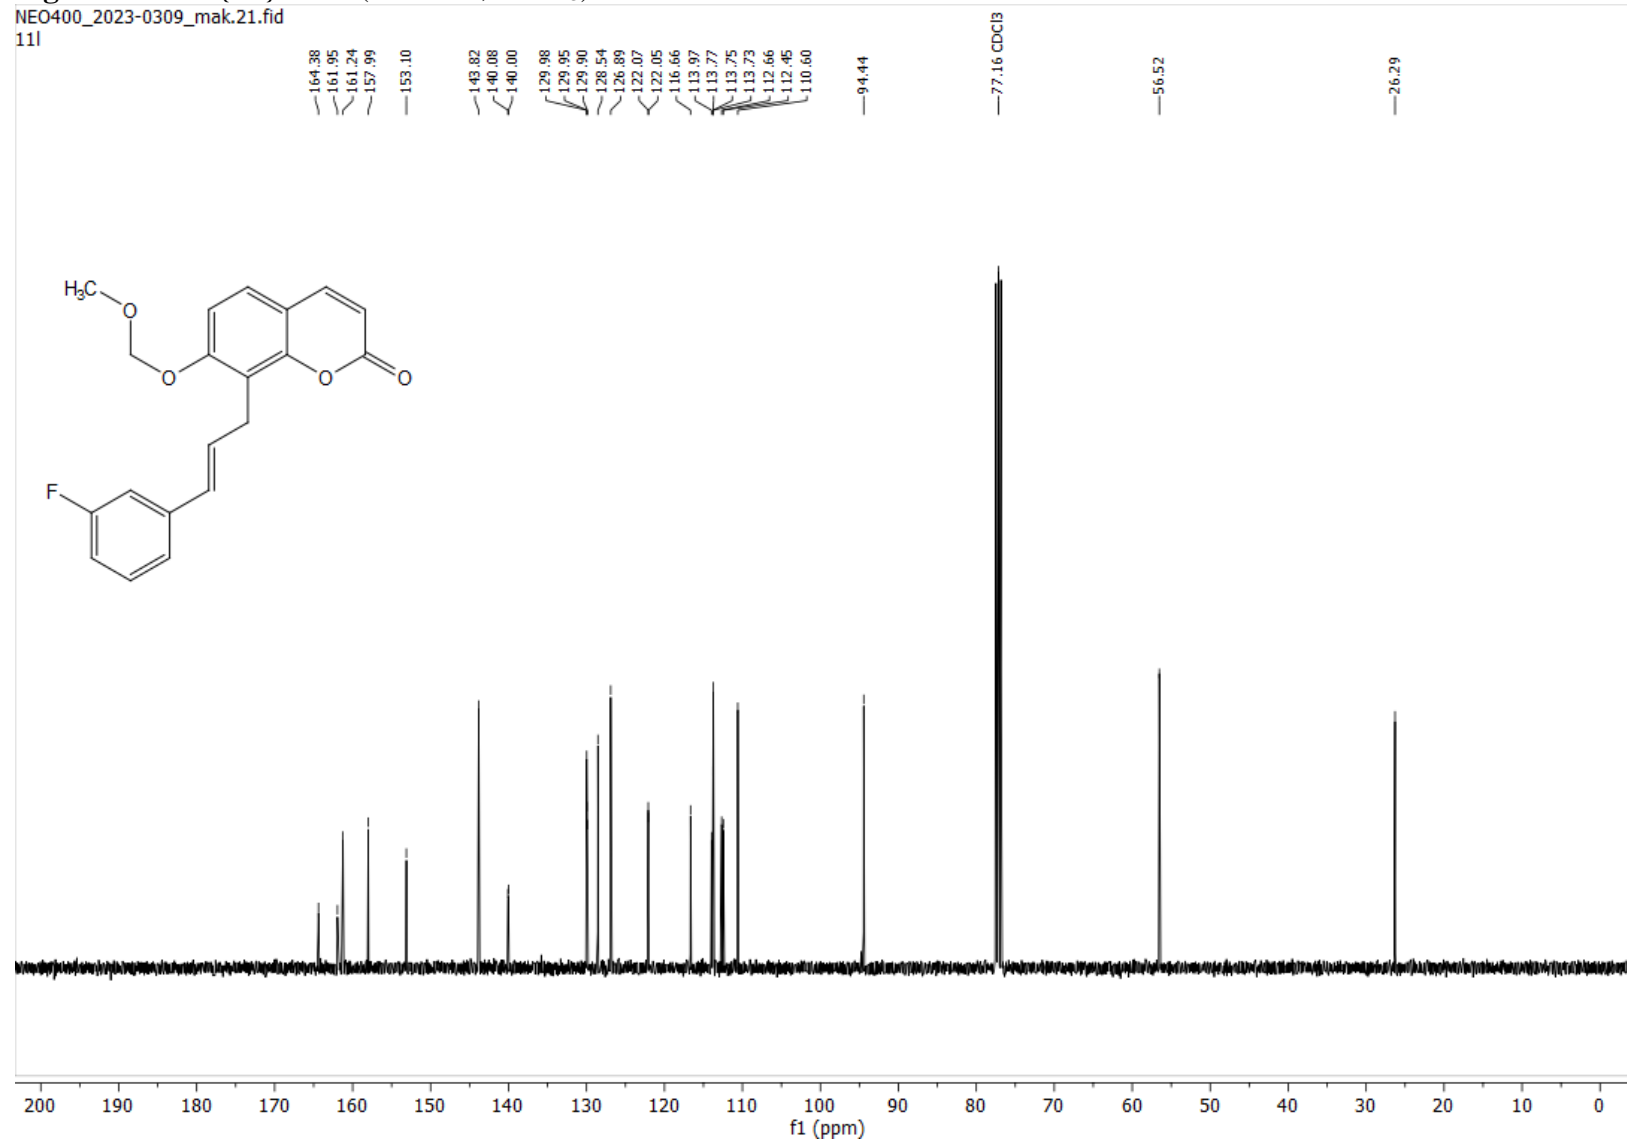

**Figure S58:**  $^1\text{H}$  NMR (400 MHz,  $\text{CDCl}_3$ ) of **12am**

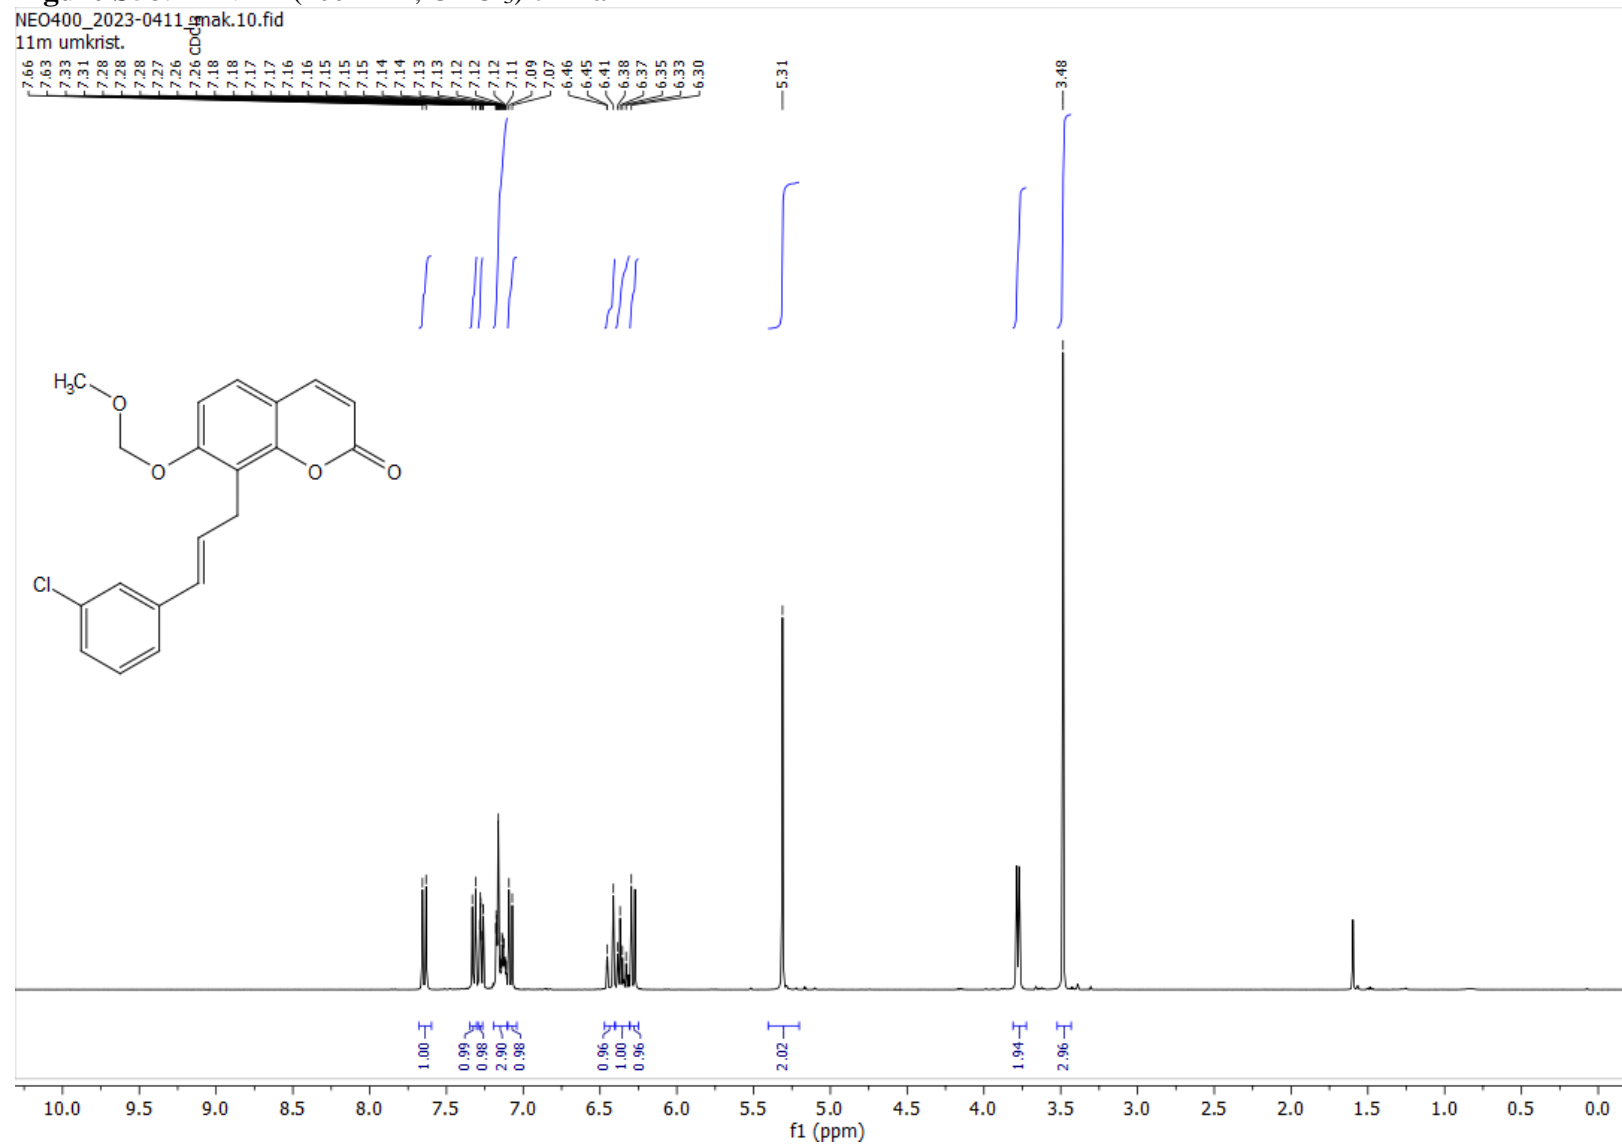

**Figure S59:**  $^{13}\text{C}\{^1\text{H}\}$  NMR (100 MHz,  $\text{CDCl}_3$ ) of **12am**

NEO400\_2023-0411\_mak.11.fid  
11m umkrist.

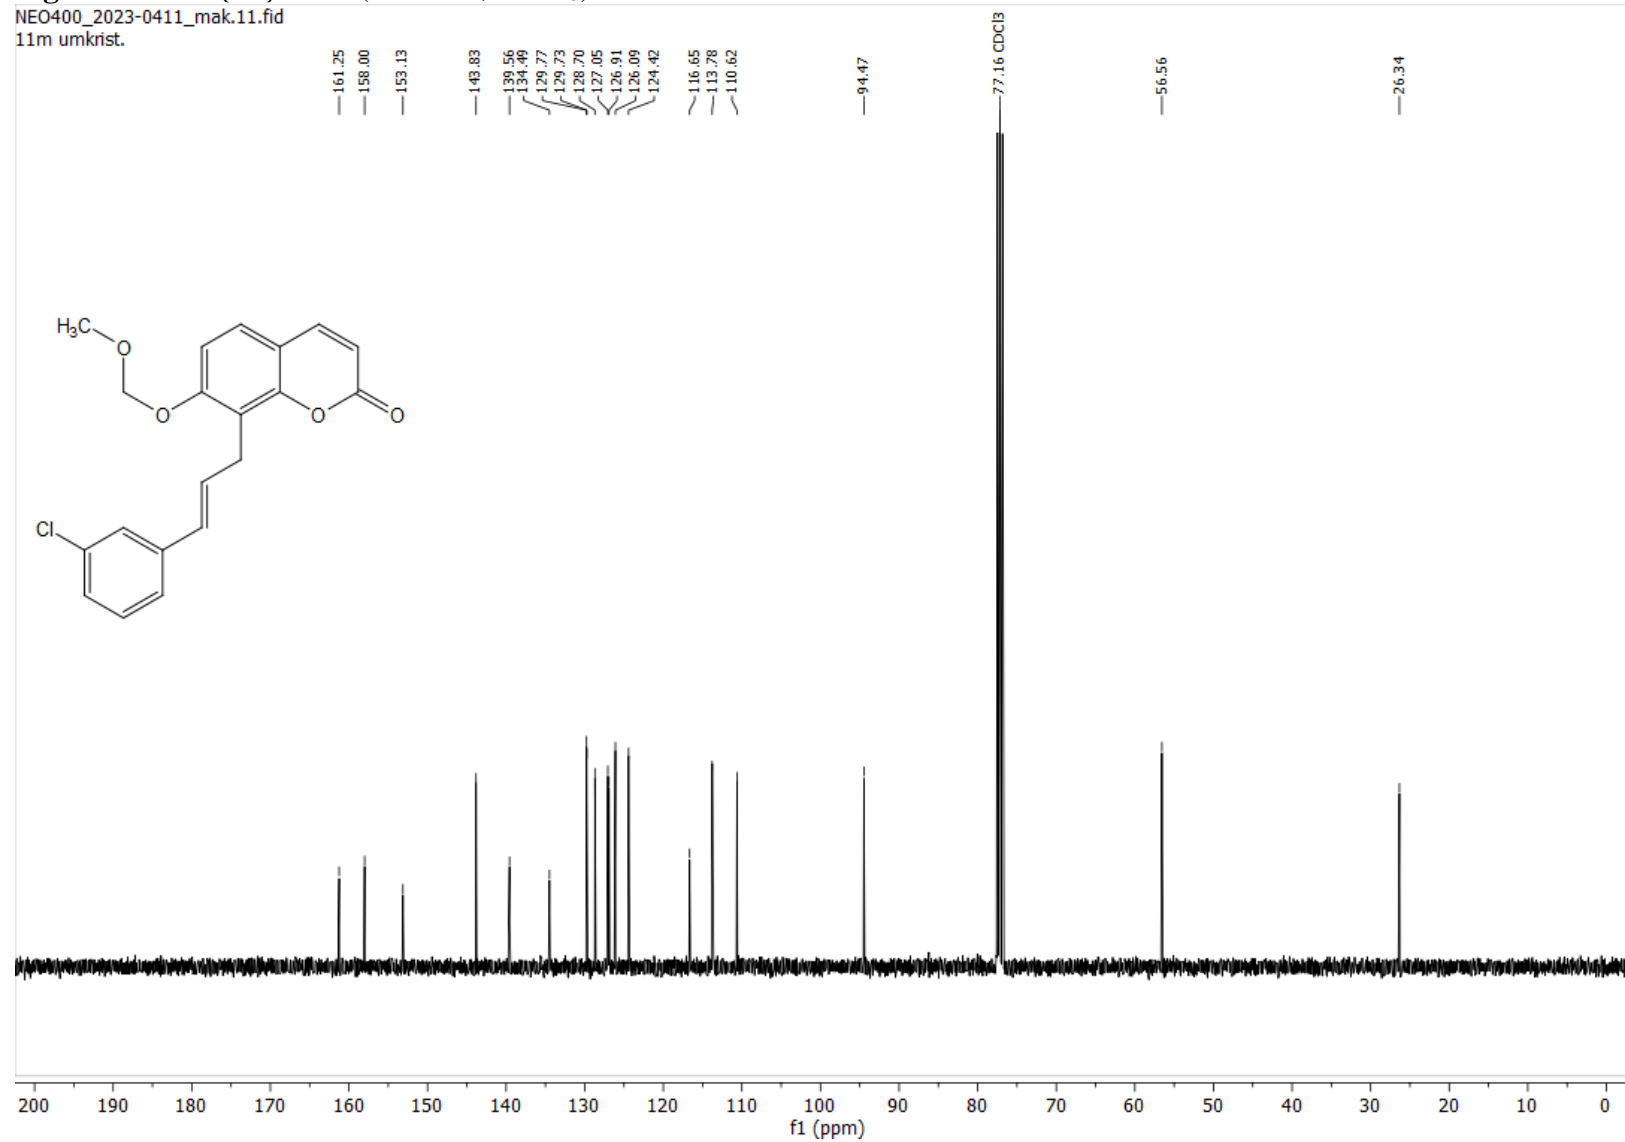

**Figure S60:**  $^1\text{H}$  NMR (400 MHz,  $\text{CDCl}_3$ ) of **12an**

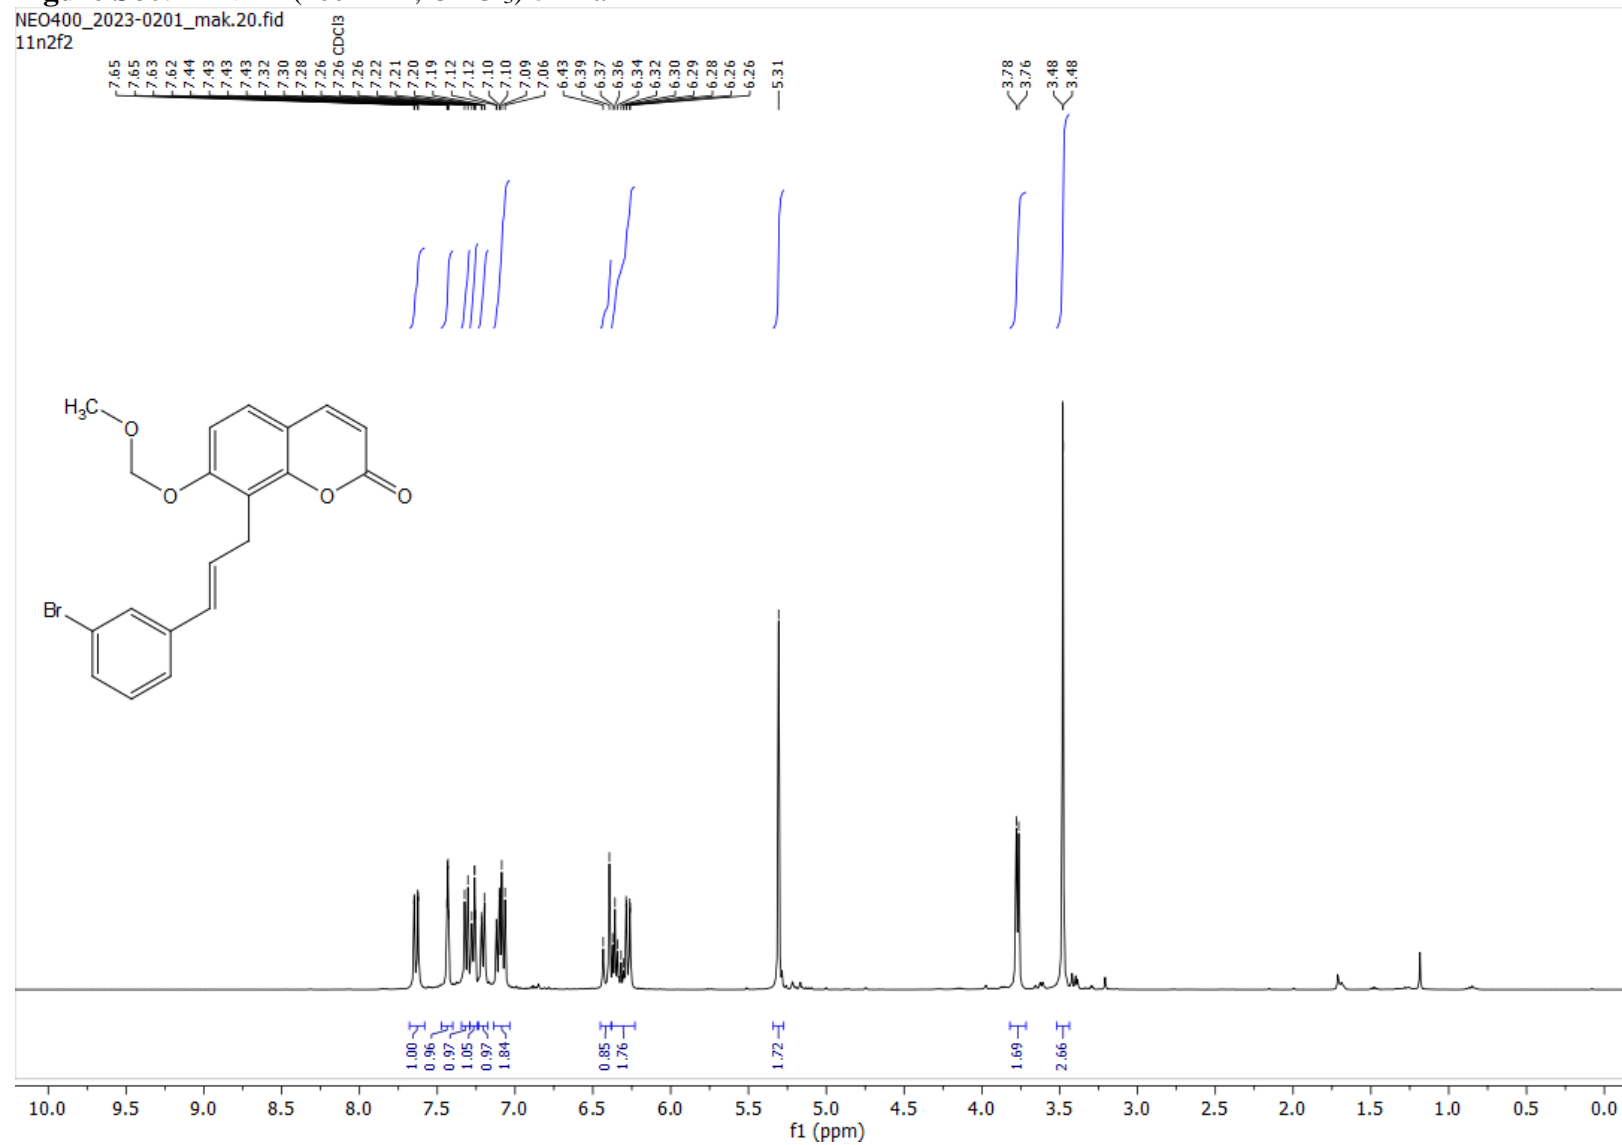

**Figure S61:**  $^{13}\text{C}\{^1\text{H}\}$  NMR (100 MHz,  $\text{CDCl}_3$ ) of **12an**

NEO400\_2023-0201\_mak.21.fid  
11n2f2

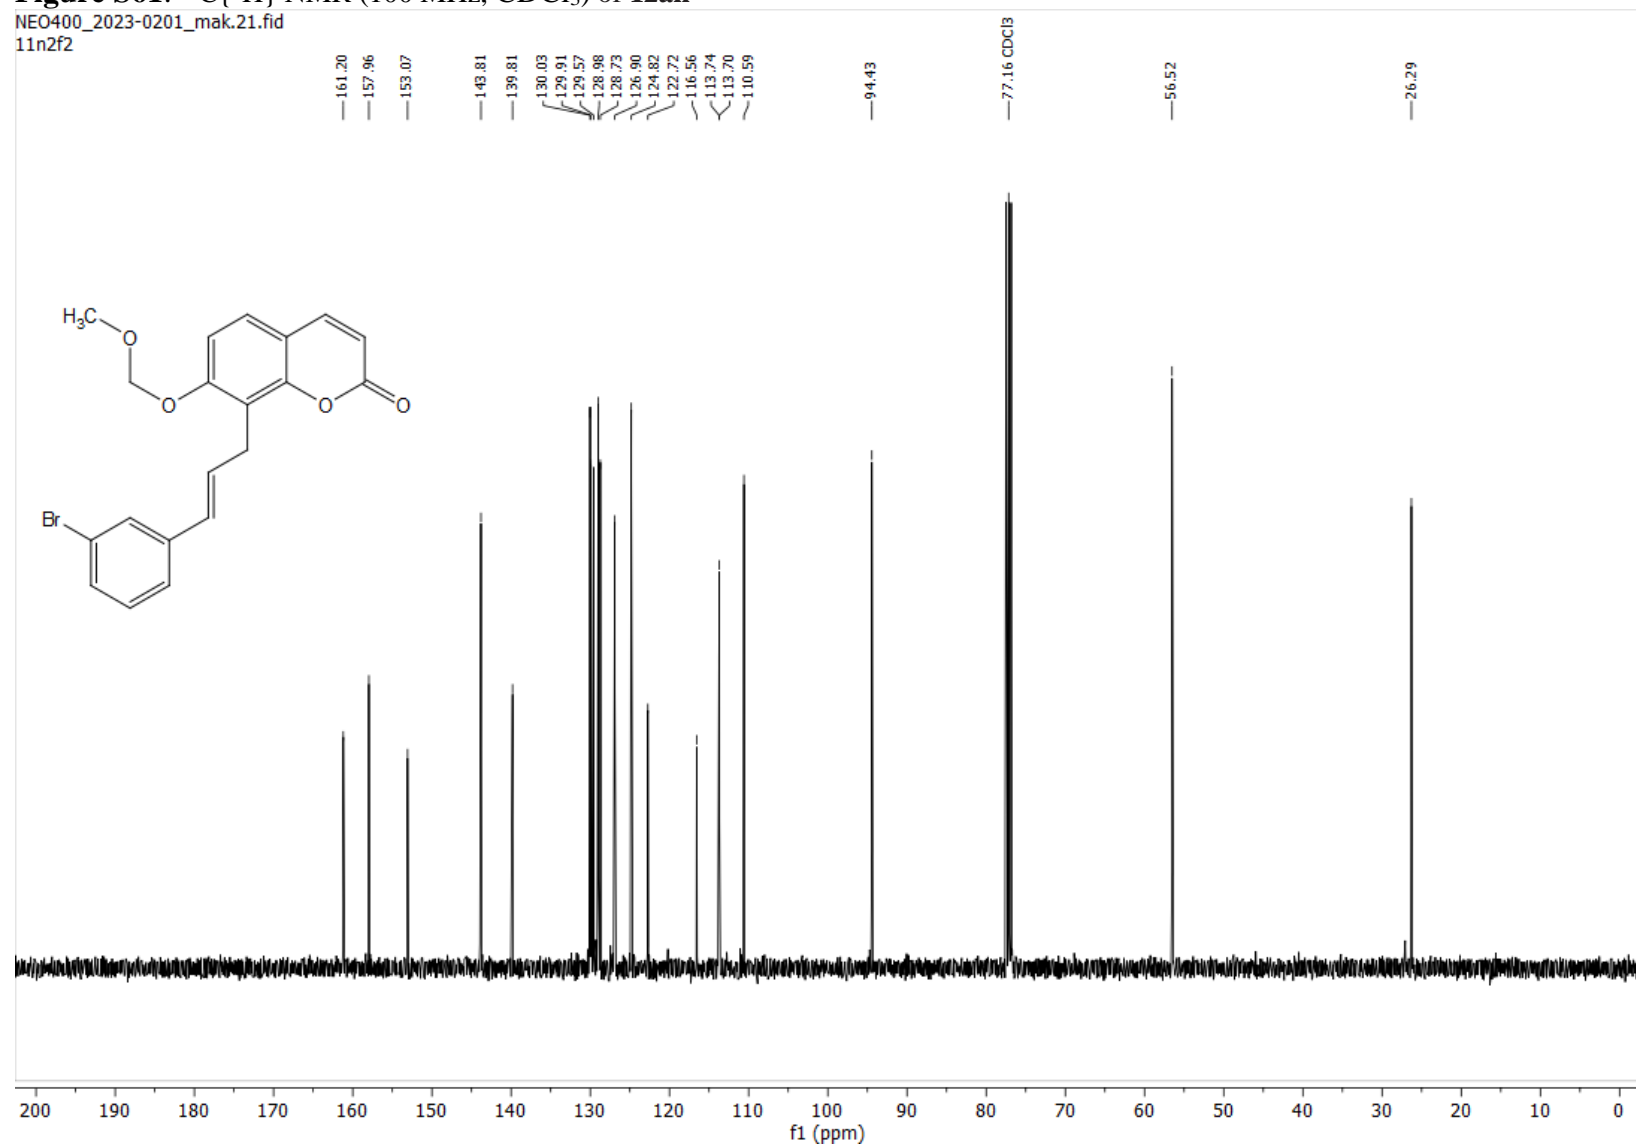



**Figure S62:**  $^1\text{H}$  NMR (400 MHz,  $\text{CDCl}_3$ ) of **12ao**

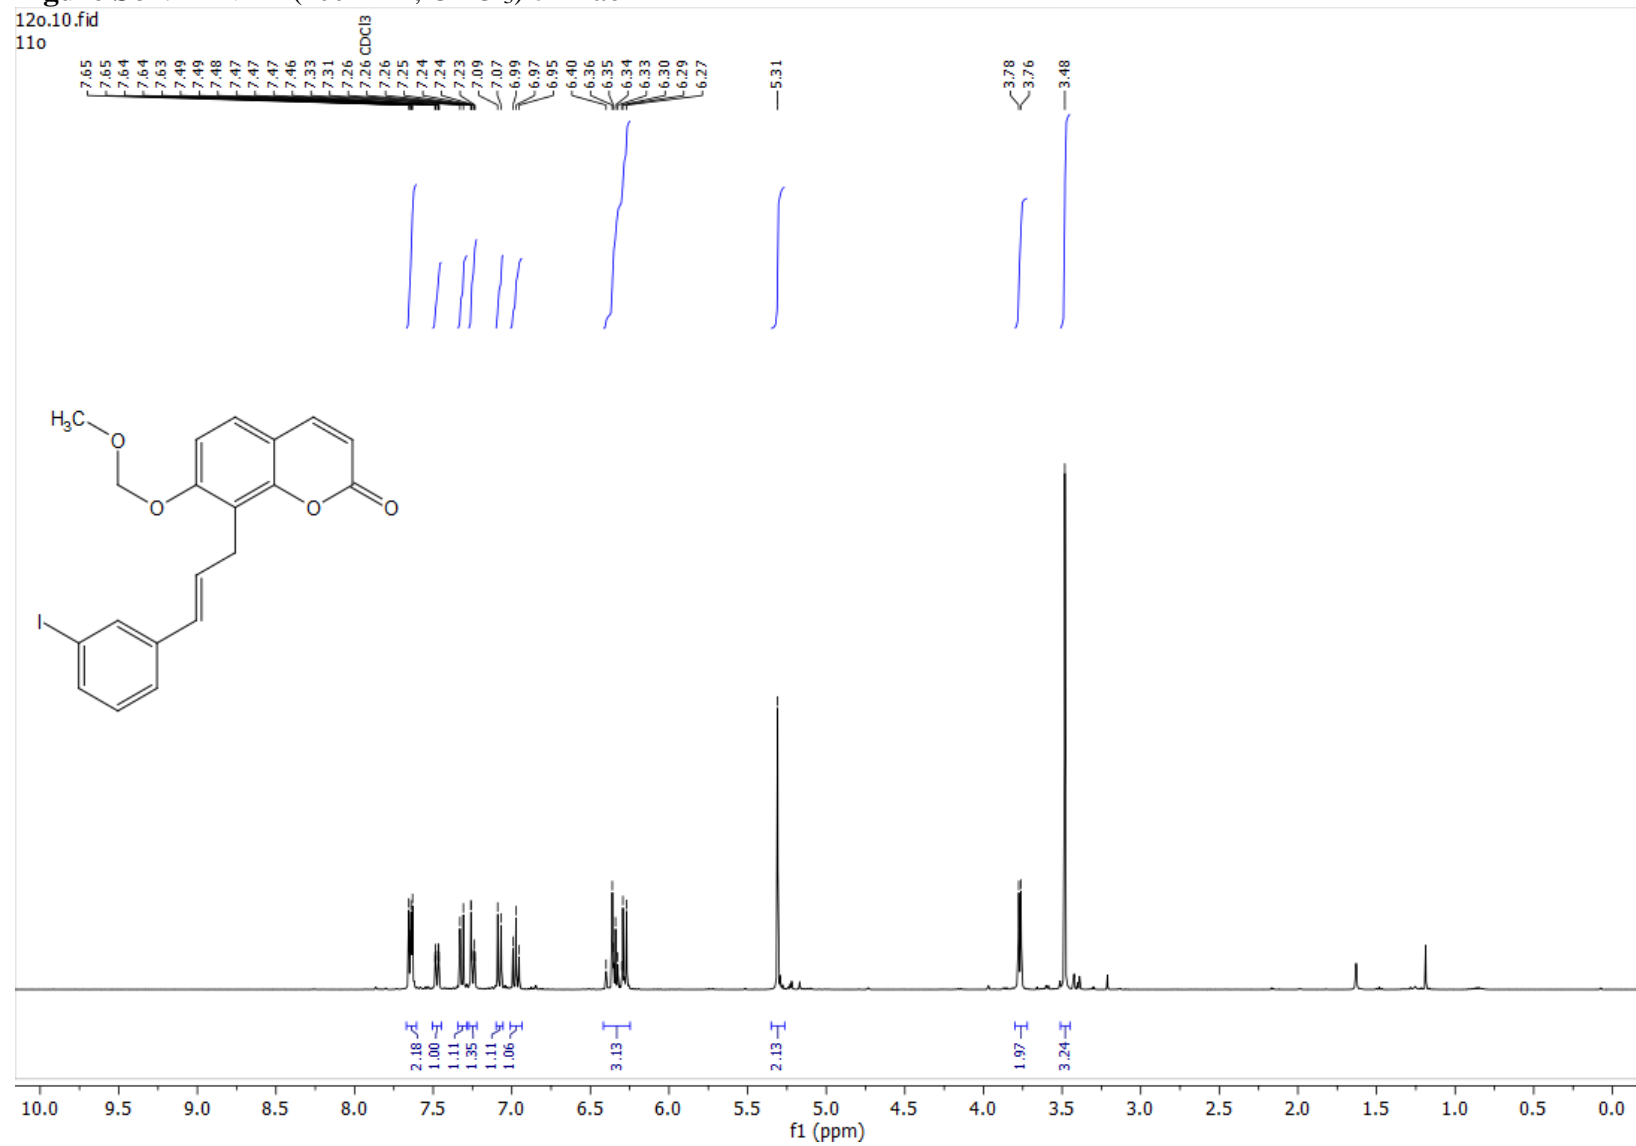

**Figure S63:**  $^{13}\text{C}\{^1\text{H}\}$  NMR (100 MHz,  $\text{CDCl}_3$ ) of **12ao**

12o.11.fid  
11o

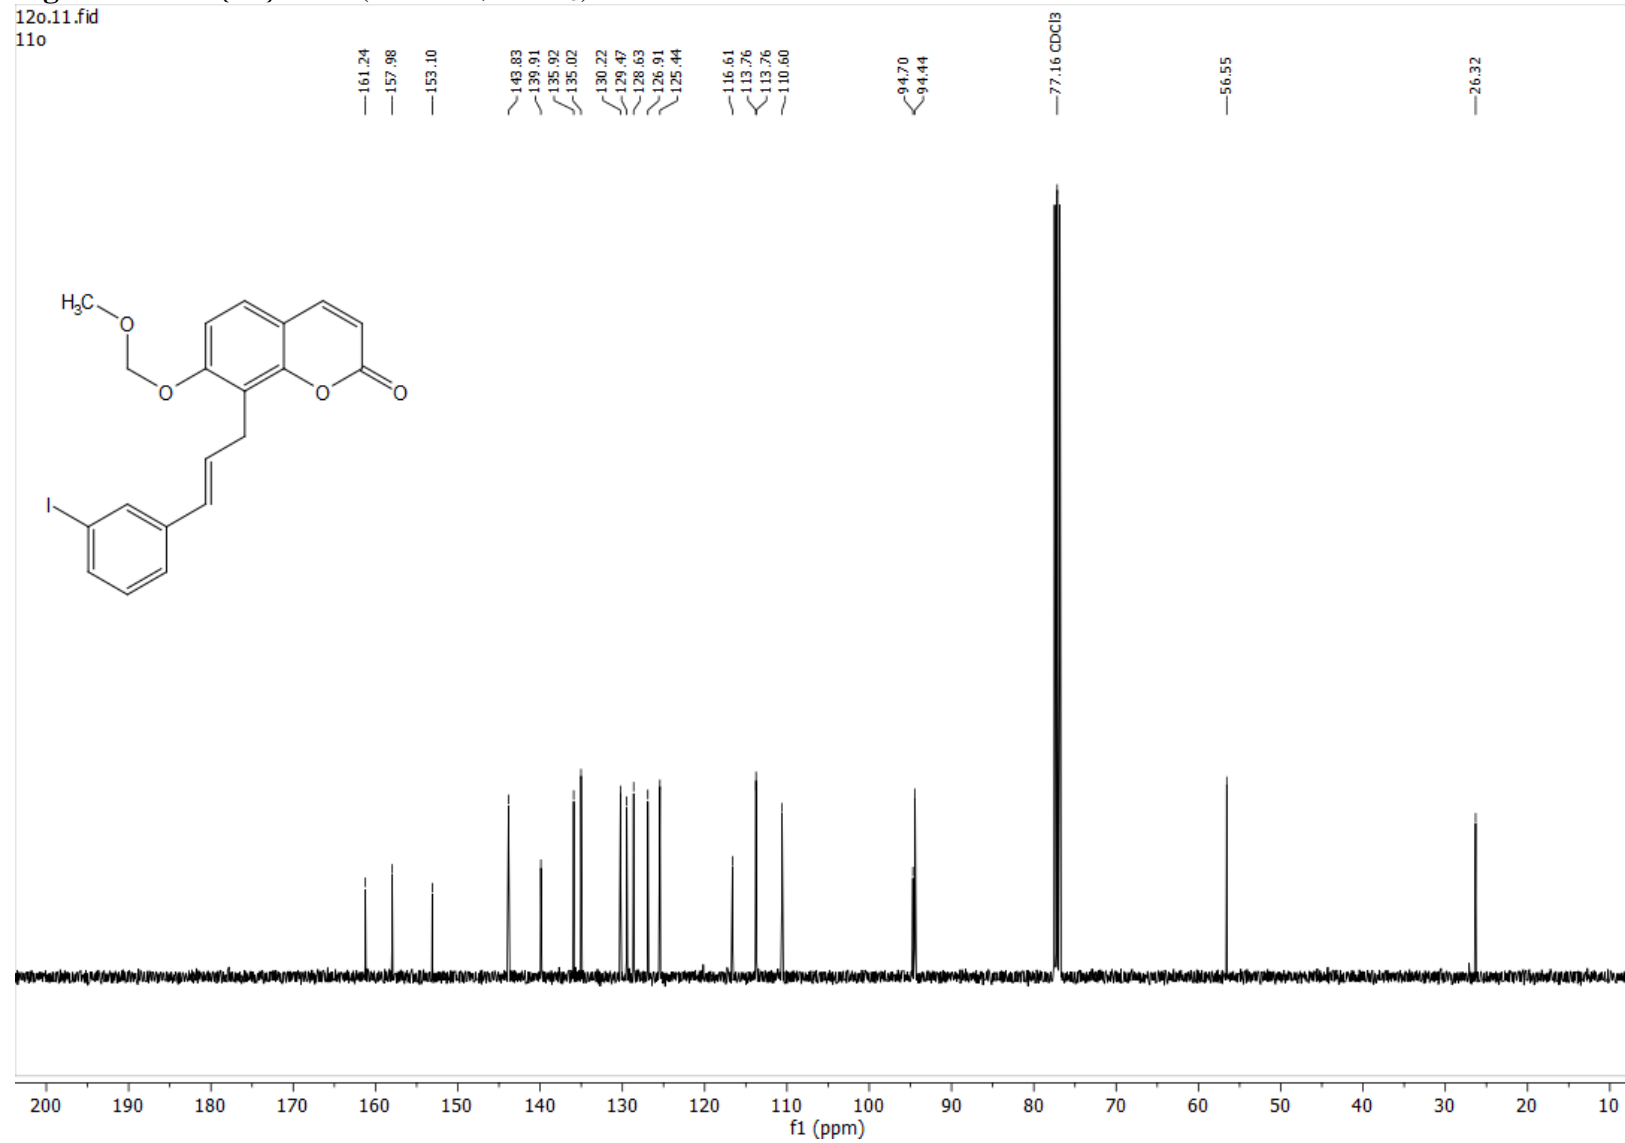

**Figure S64:**  $^1\text{H}$  NMR (400 MHz,  $\text{CDCl}_3$ ) of **12ap**

NEO400\_2022-1215\_mak.20.fid  
664s

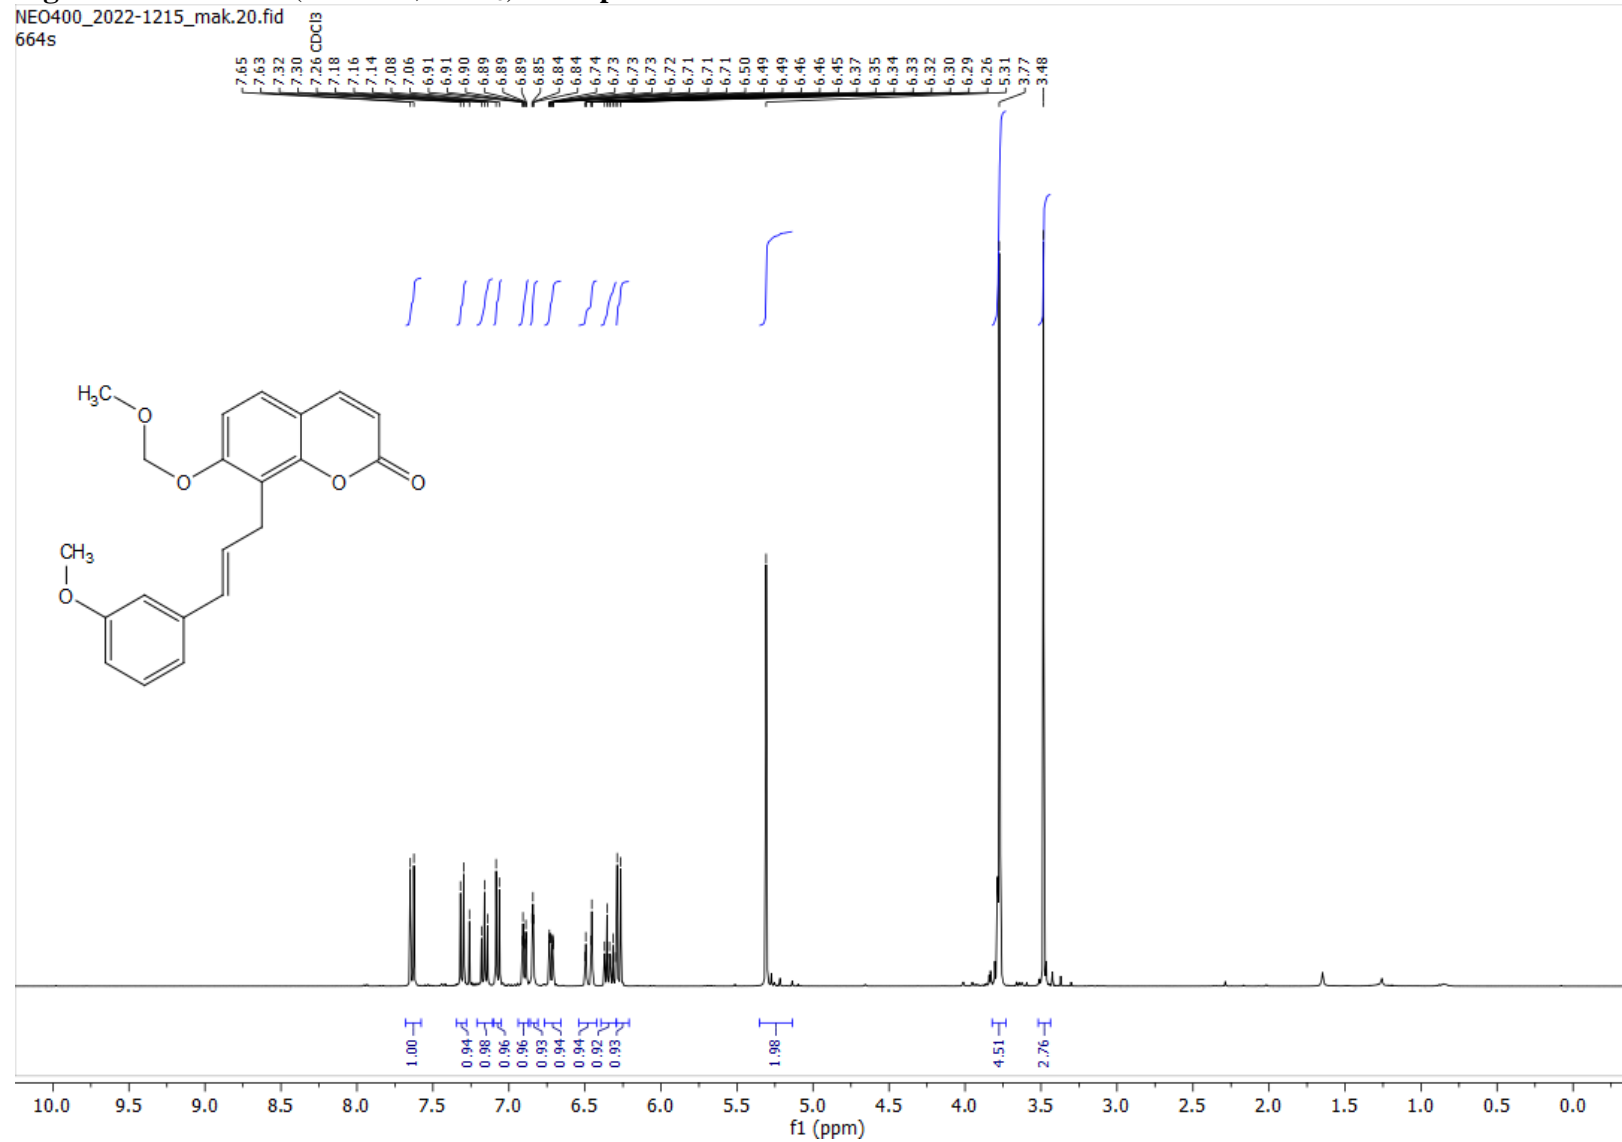

**Figure S65:**  $^{13}\text{C}\{^1\text{H}\}$  NMR (100 MHz,  $\text{CDCl}_3$ ) of **12ap**

NEO400\_2022-1215\_mak.21.fid  
664s

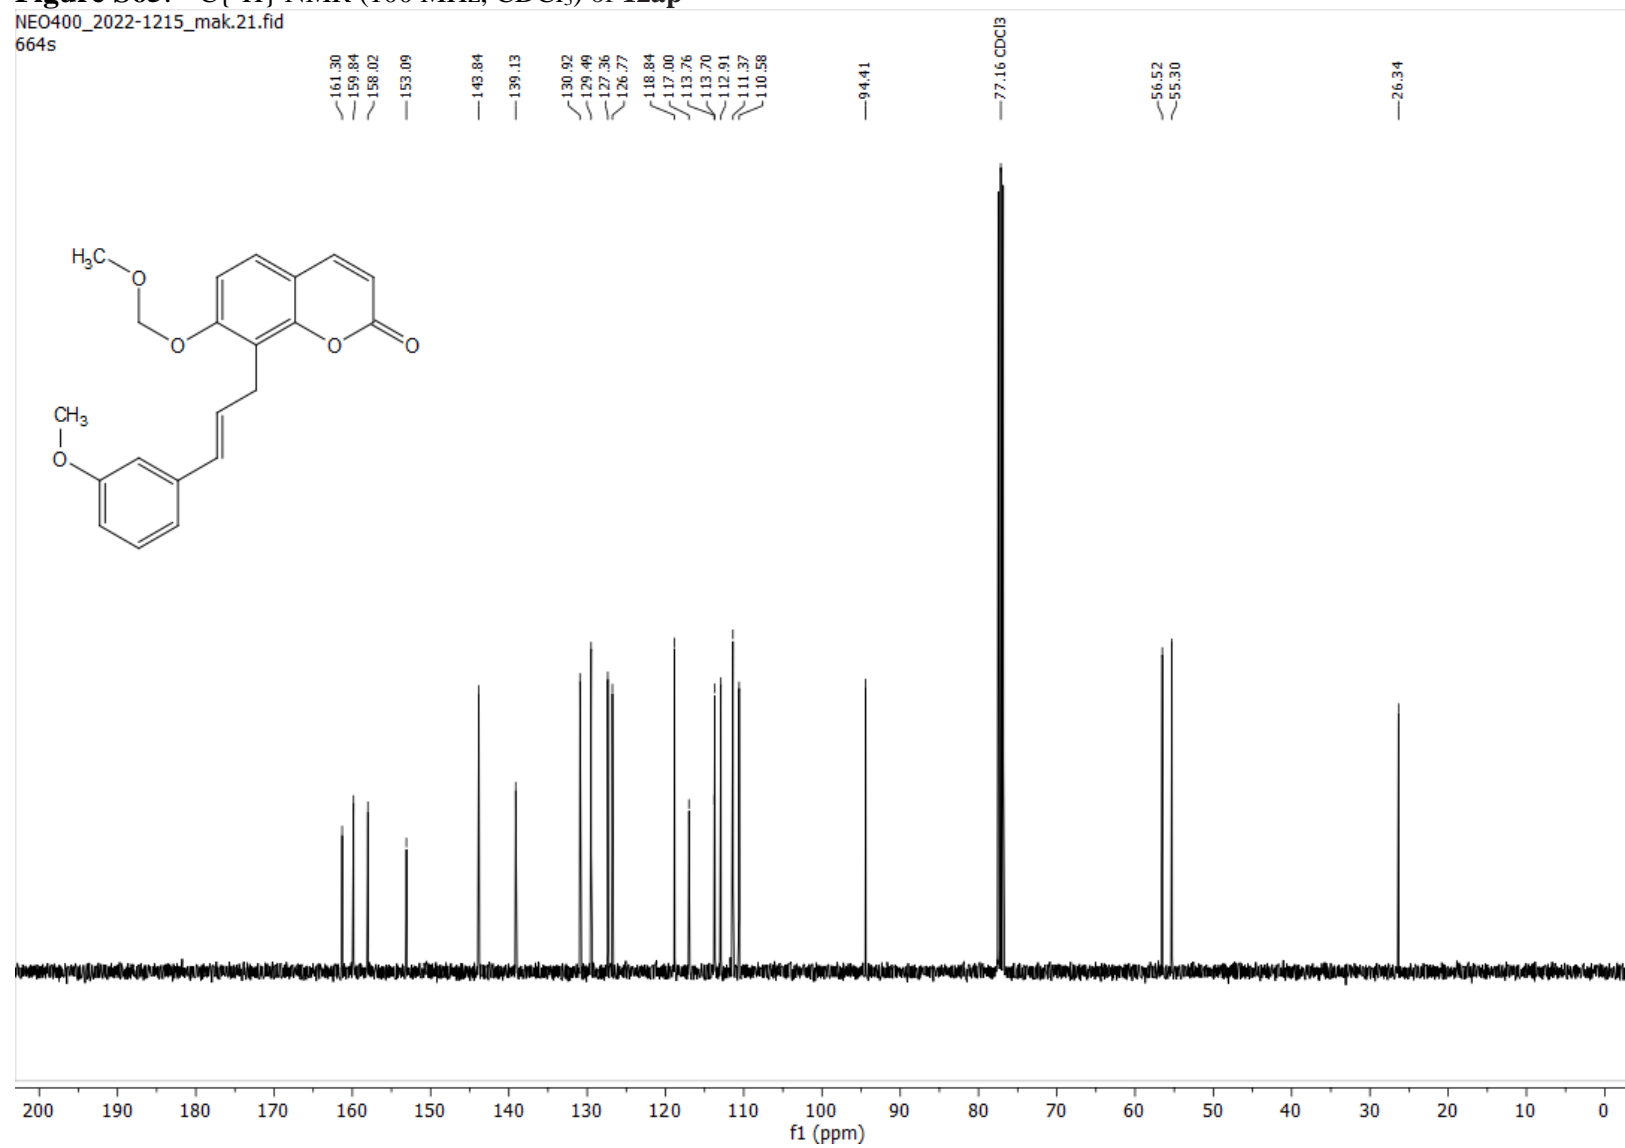

**Figure S66:** COSY (400 MHz, CDCl<sub>3</sub>) of **12ap**

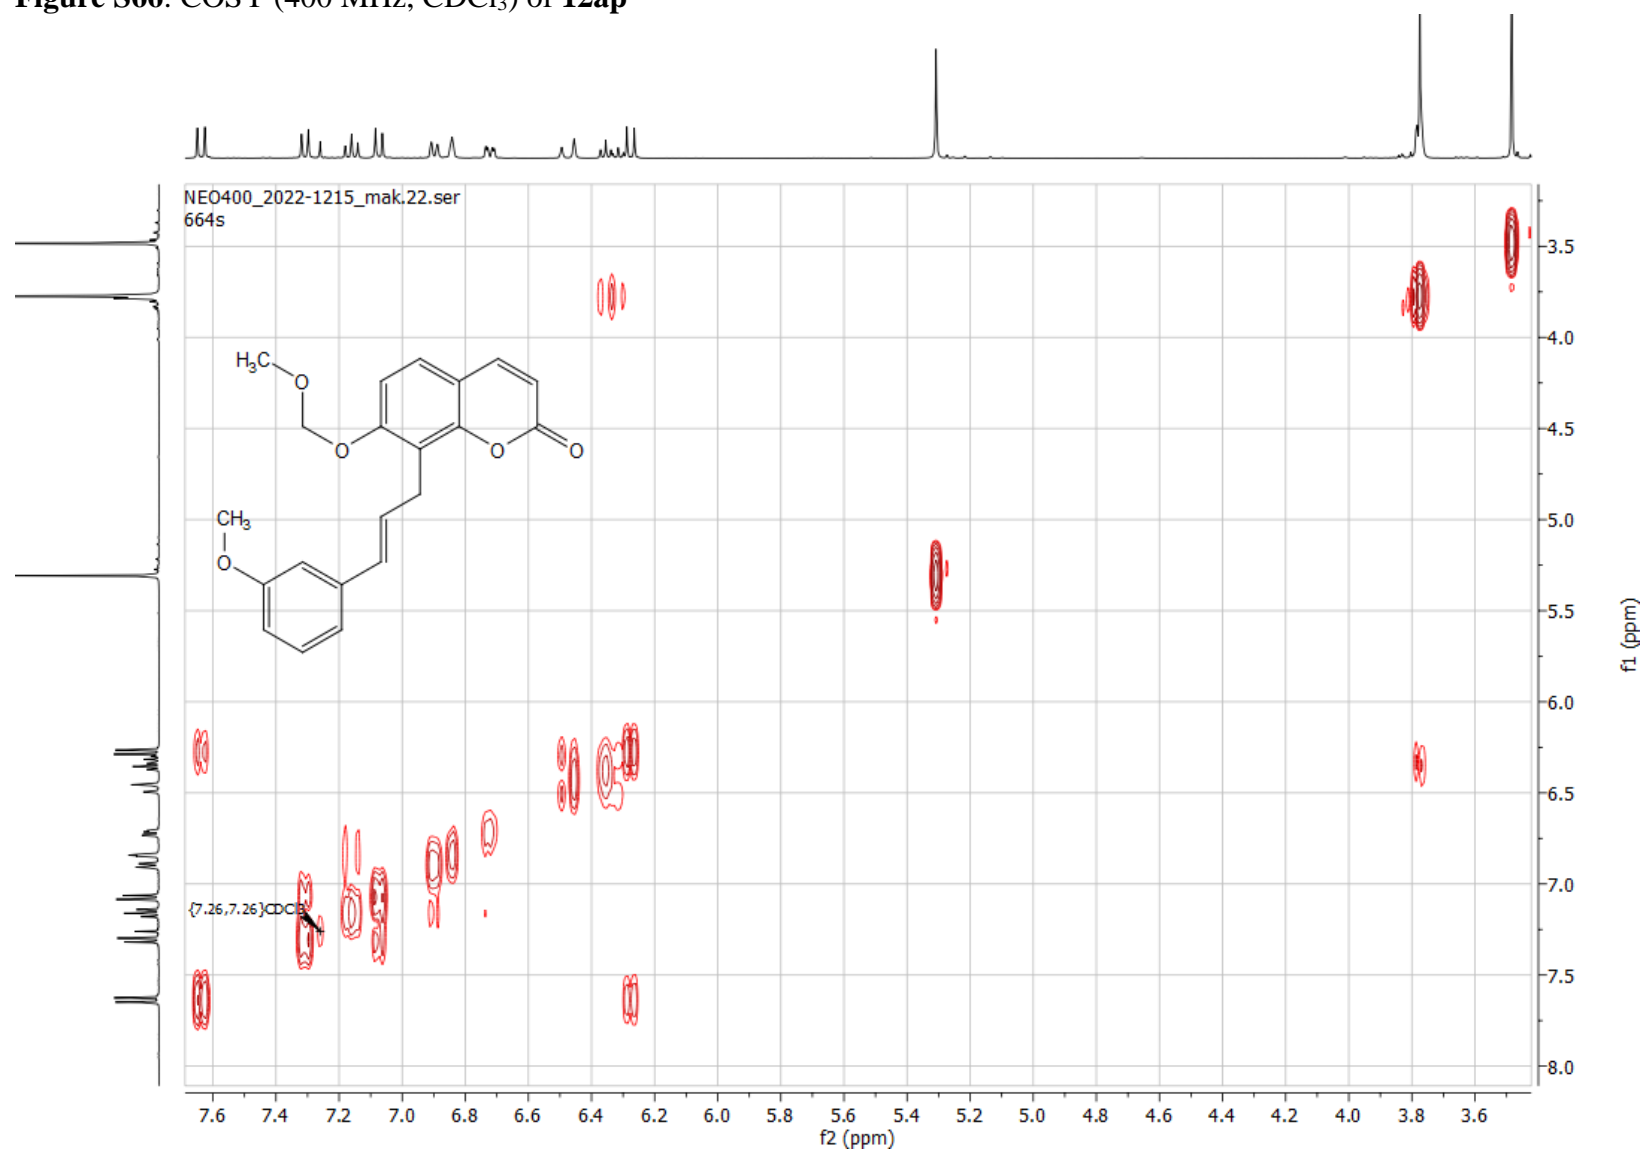

Figure S67: HSQC (400/100 MHz, CDCl<sub>3</sub>) of 12ap

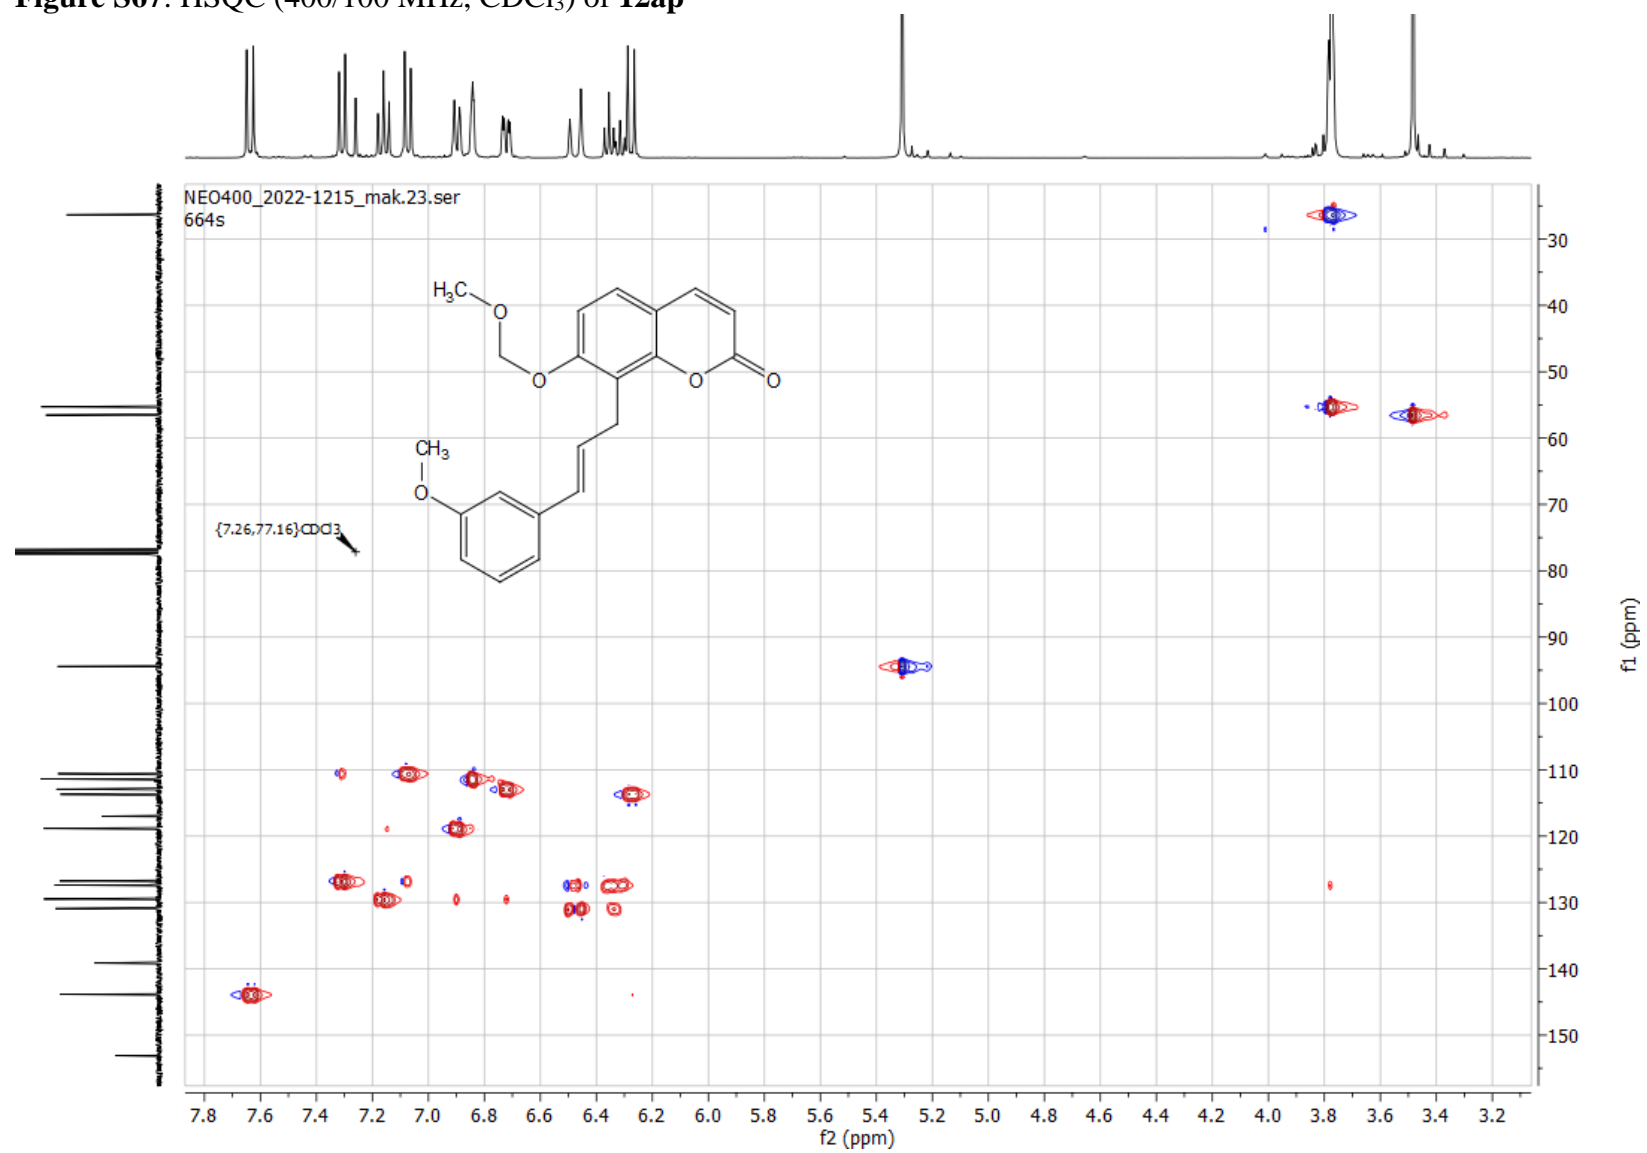

Figure S68: HMBC (400/100 MHz, CDCl<sub>3</sub>) of 12ap

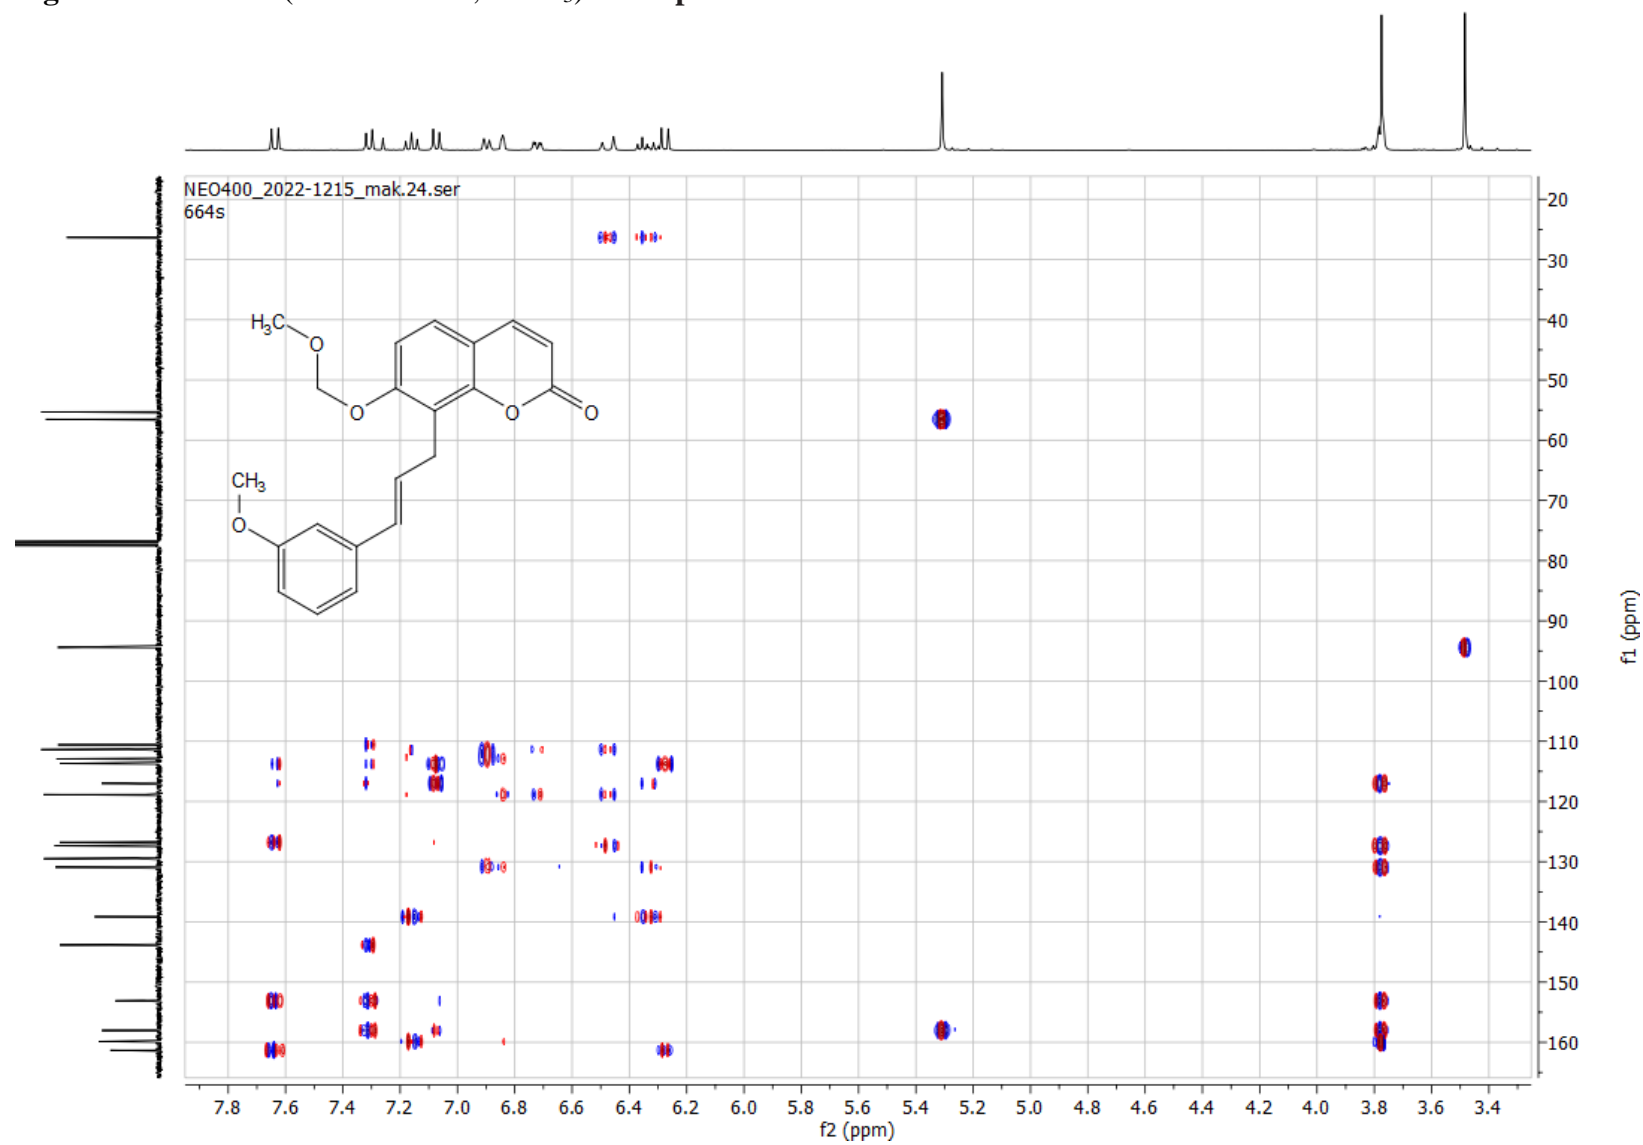

**Figure S69:** NOESY (400 MHz, CDCl<sub>3</sub>) of **12ap**

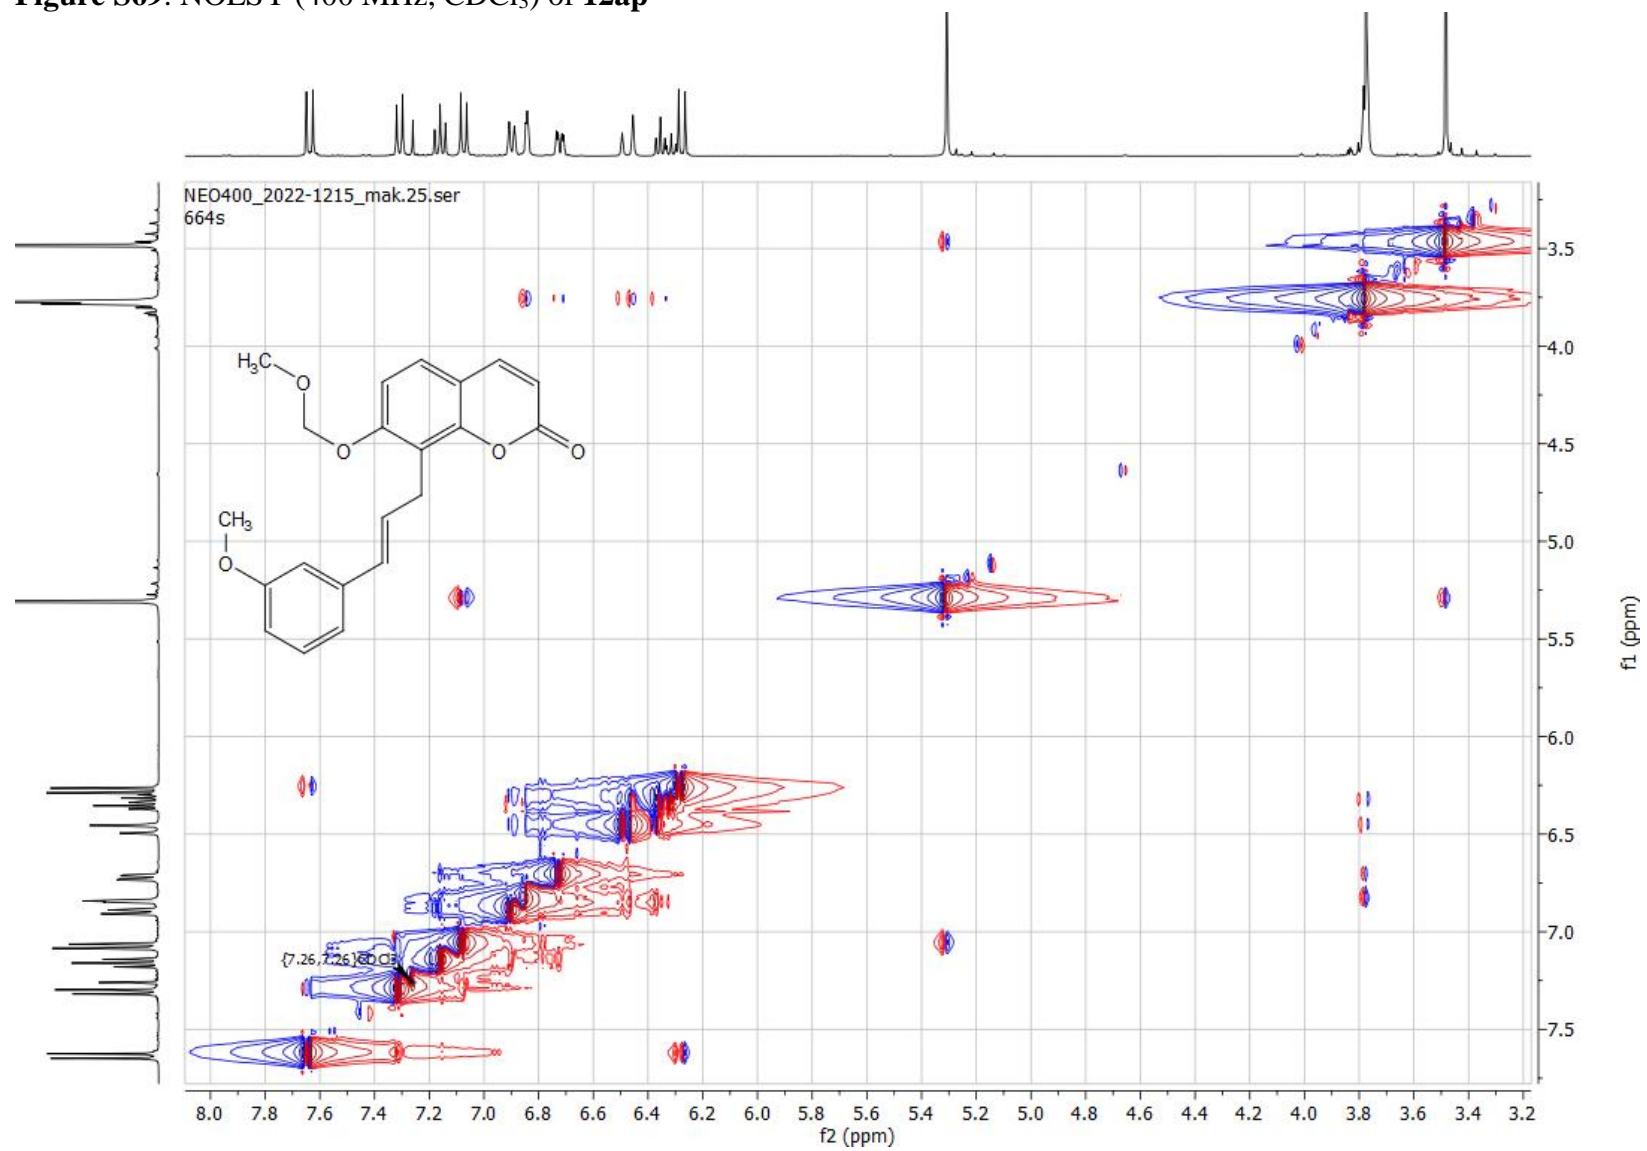



**Figure S70:**  $^1\text{H}$  NMR (400 MHz,  $\text{CDCl}_3$ ) of **12aq**

NEO400\_2023-0404\_mak.20.fid  
11q umkrist.

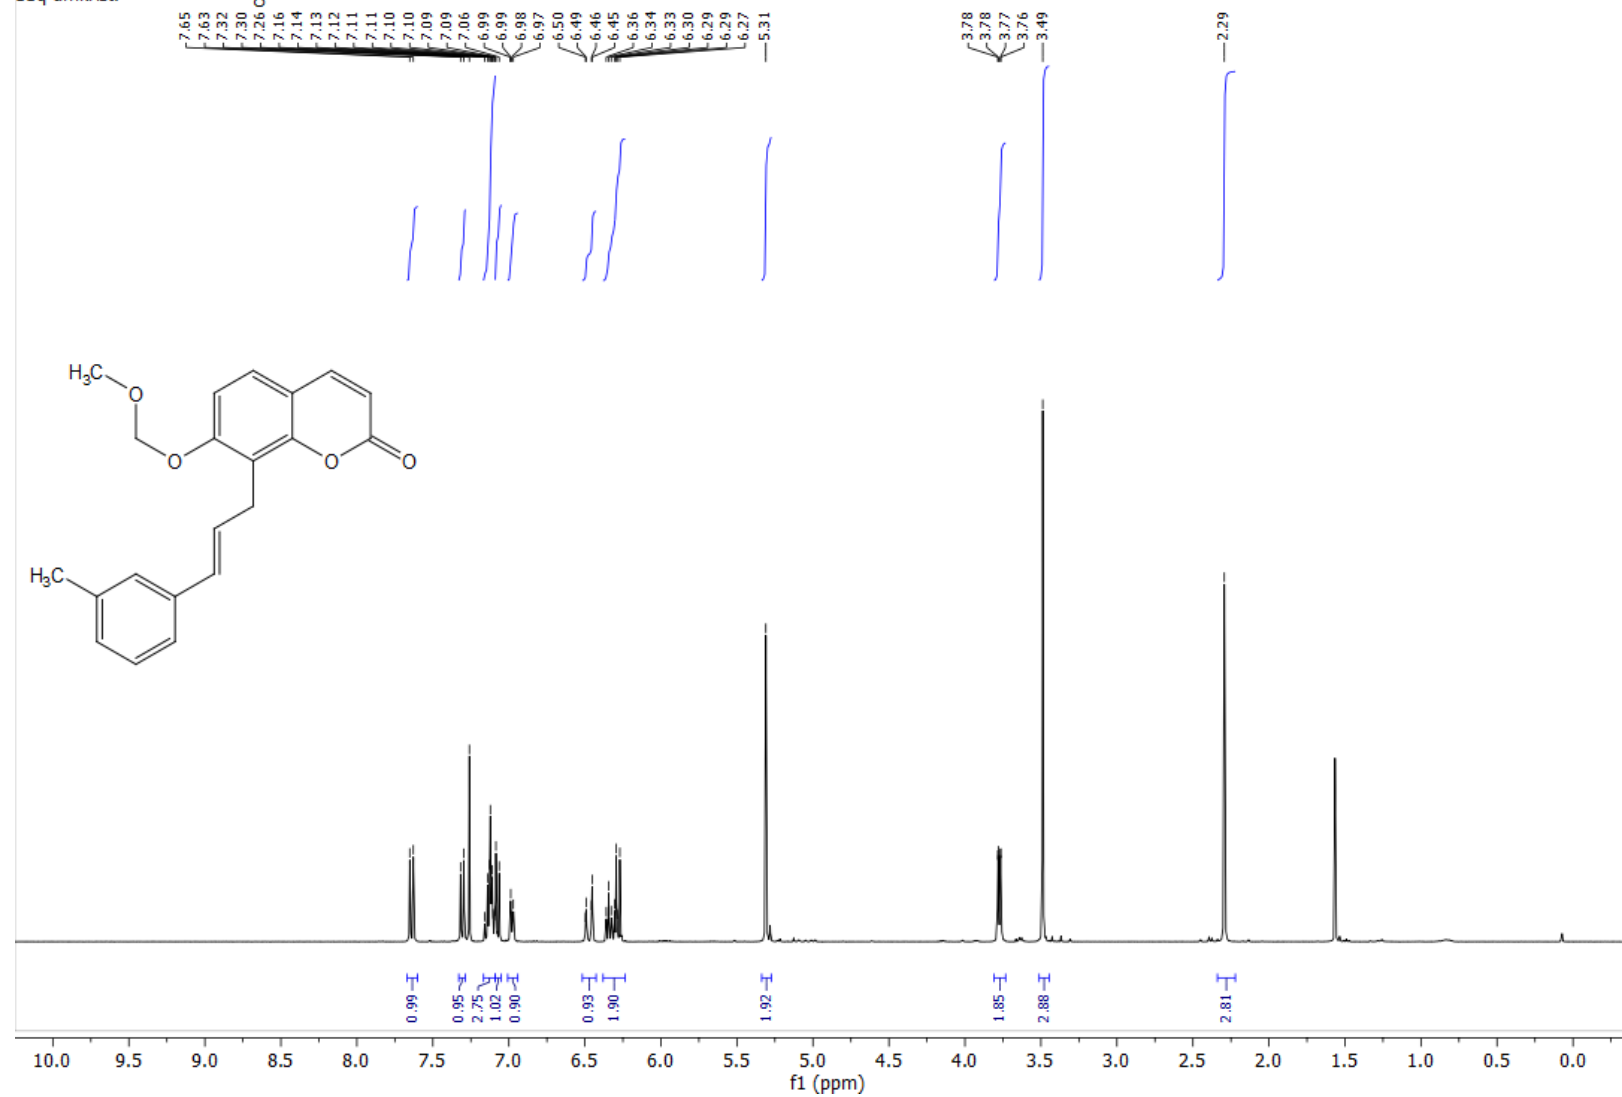

**Figure S71:**  $^{13}\text{C}\{^1\text{H}\}$  NMR (100 MHz,  $\text{CDCl}_3$ ) of **12aq**

NEO400\_2023-0323\_mak.11.fid

11q

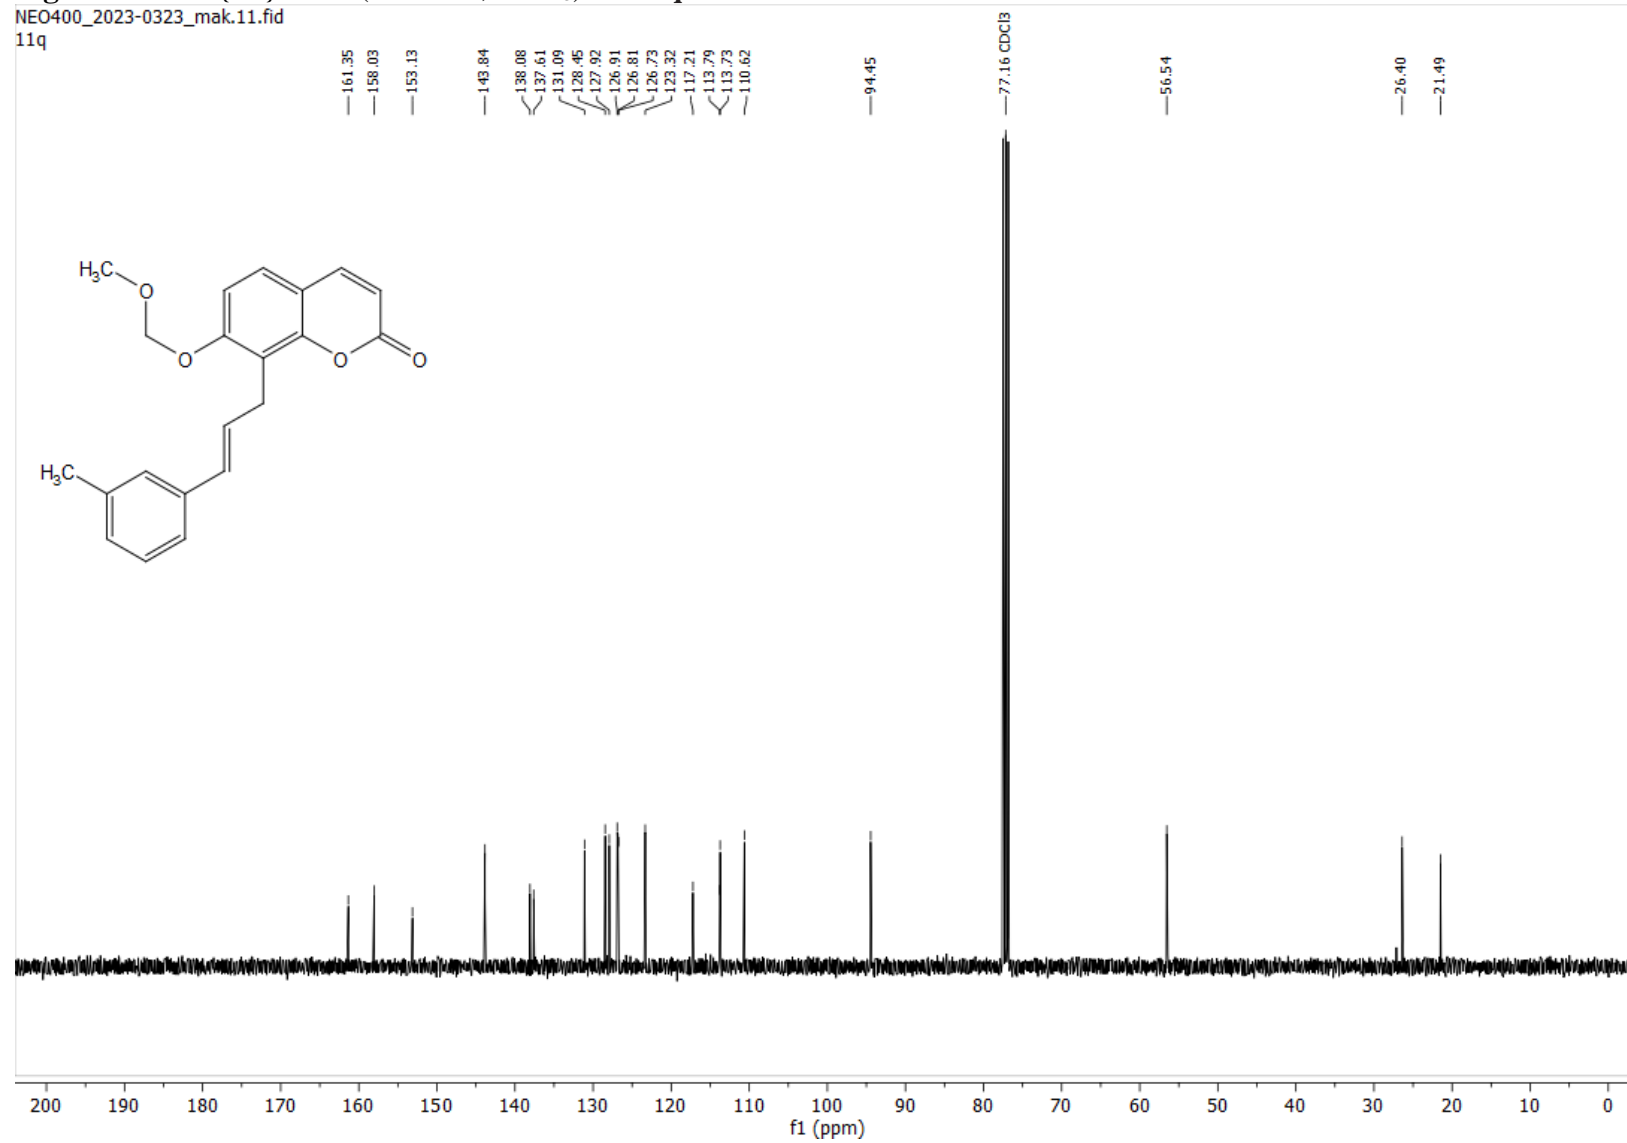

**Figure S72:**  $^1\text{H}$  NMR (400 MHz,  $\text{CDCl}_3$ ) of **12ar**

NEO400\_2023-0404\_mak.10.fid

11r umkrist.

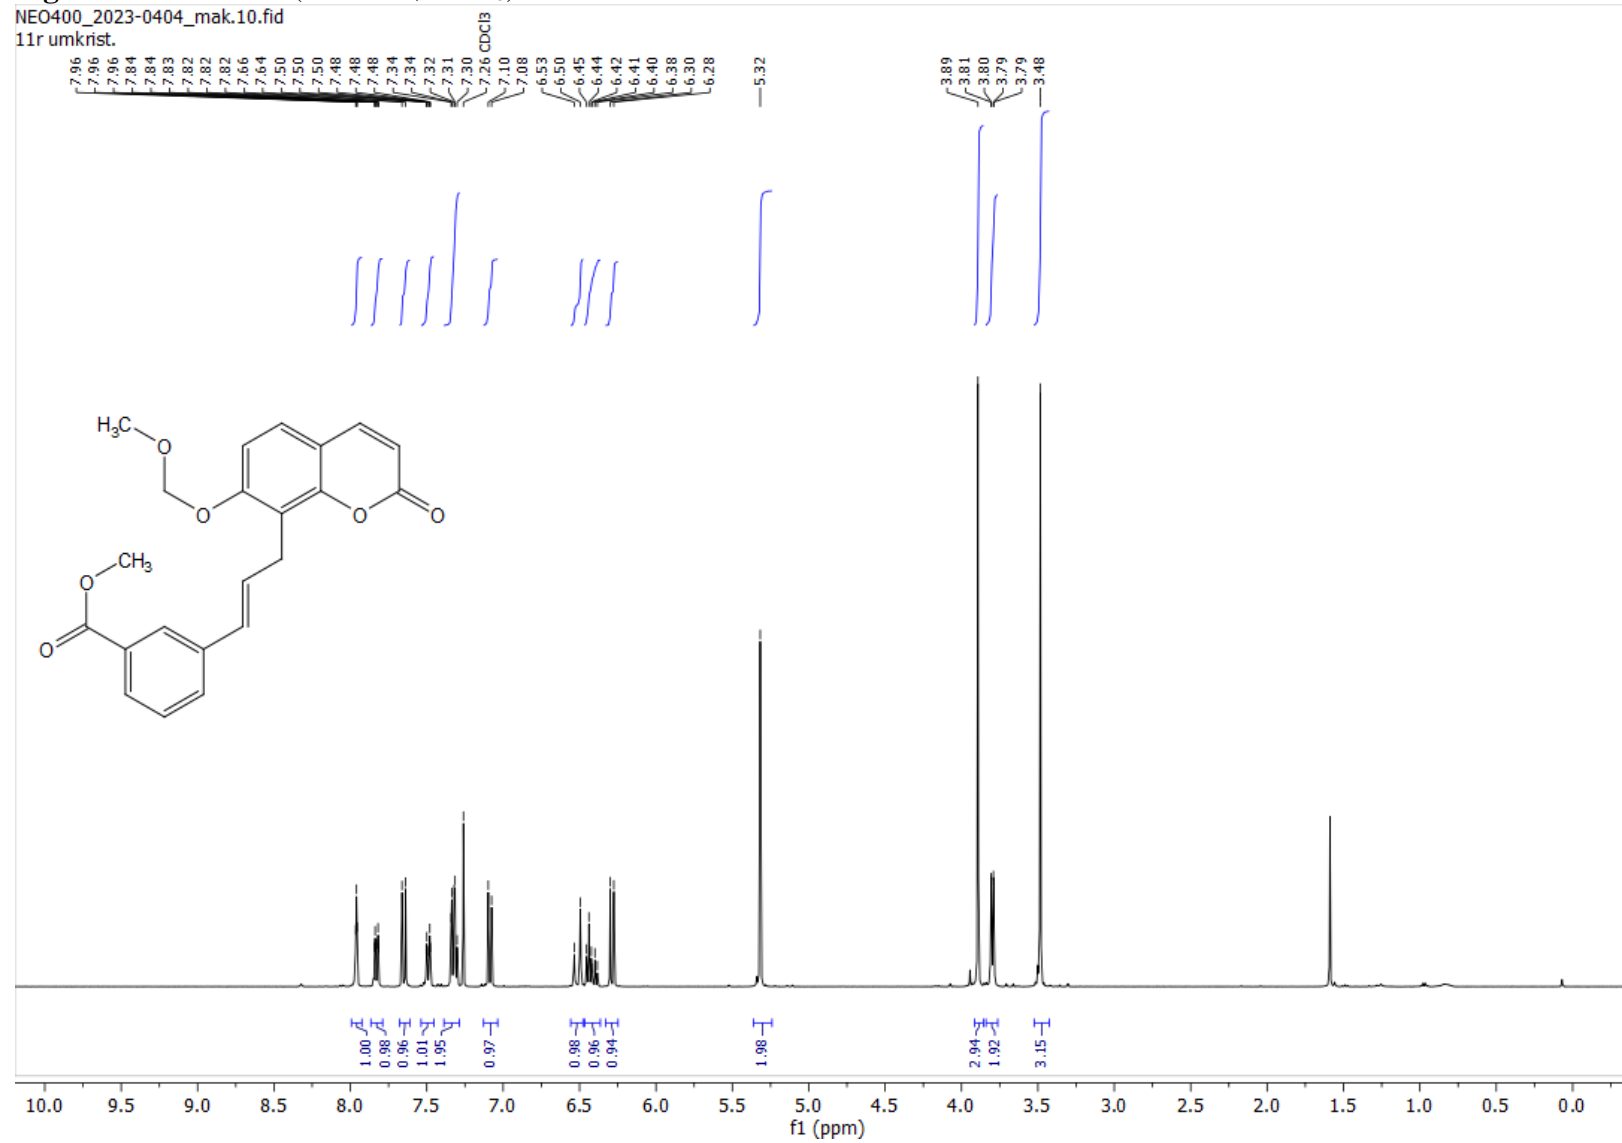

**Figure S73:**  $^{13}\text{C}\{^1\text{H}\}$  NMR (100 MHz,  $\text{CDCl}_3$ ) of **12ar**

NEO400\_2023-0404\_mak.11.fid  
11r umkrist.

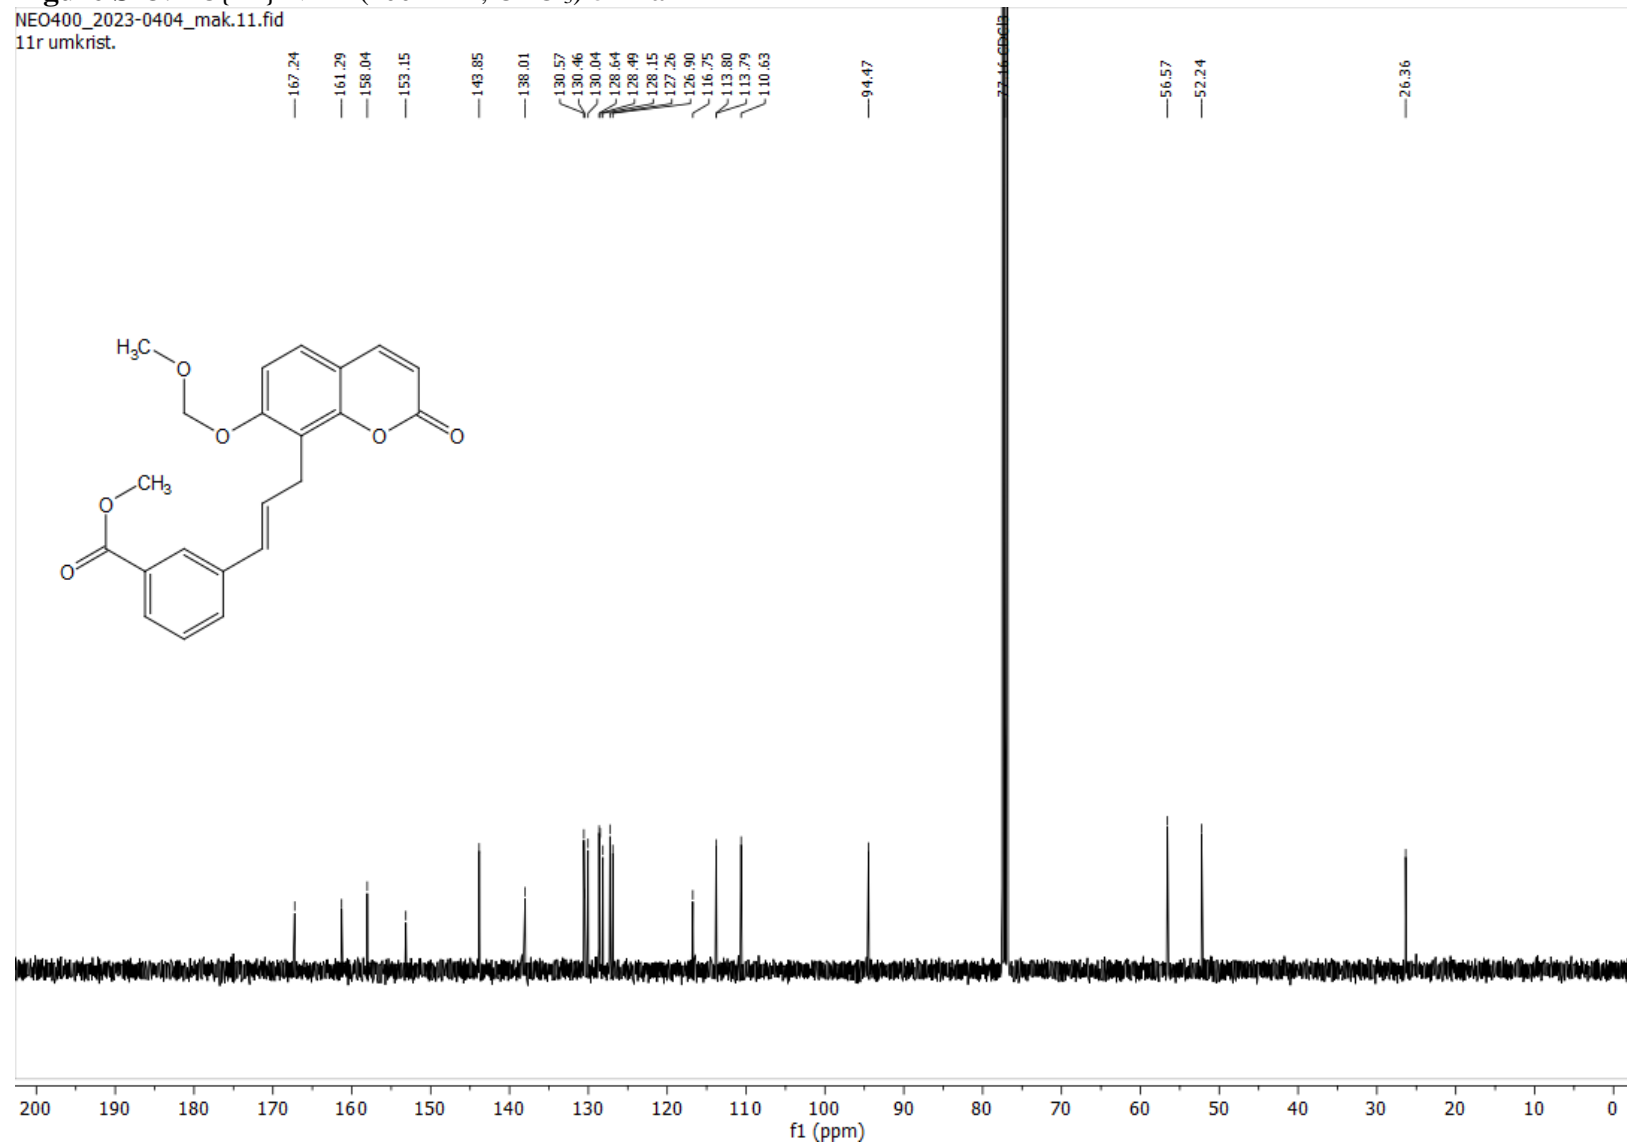

**Figure S74:**  $^1\text{H}$  NMR (400 MHz,  $\text{CDCl}_3$ ) of **12at**

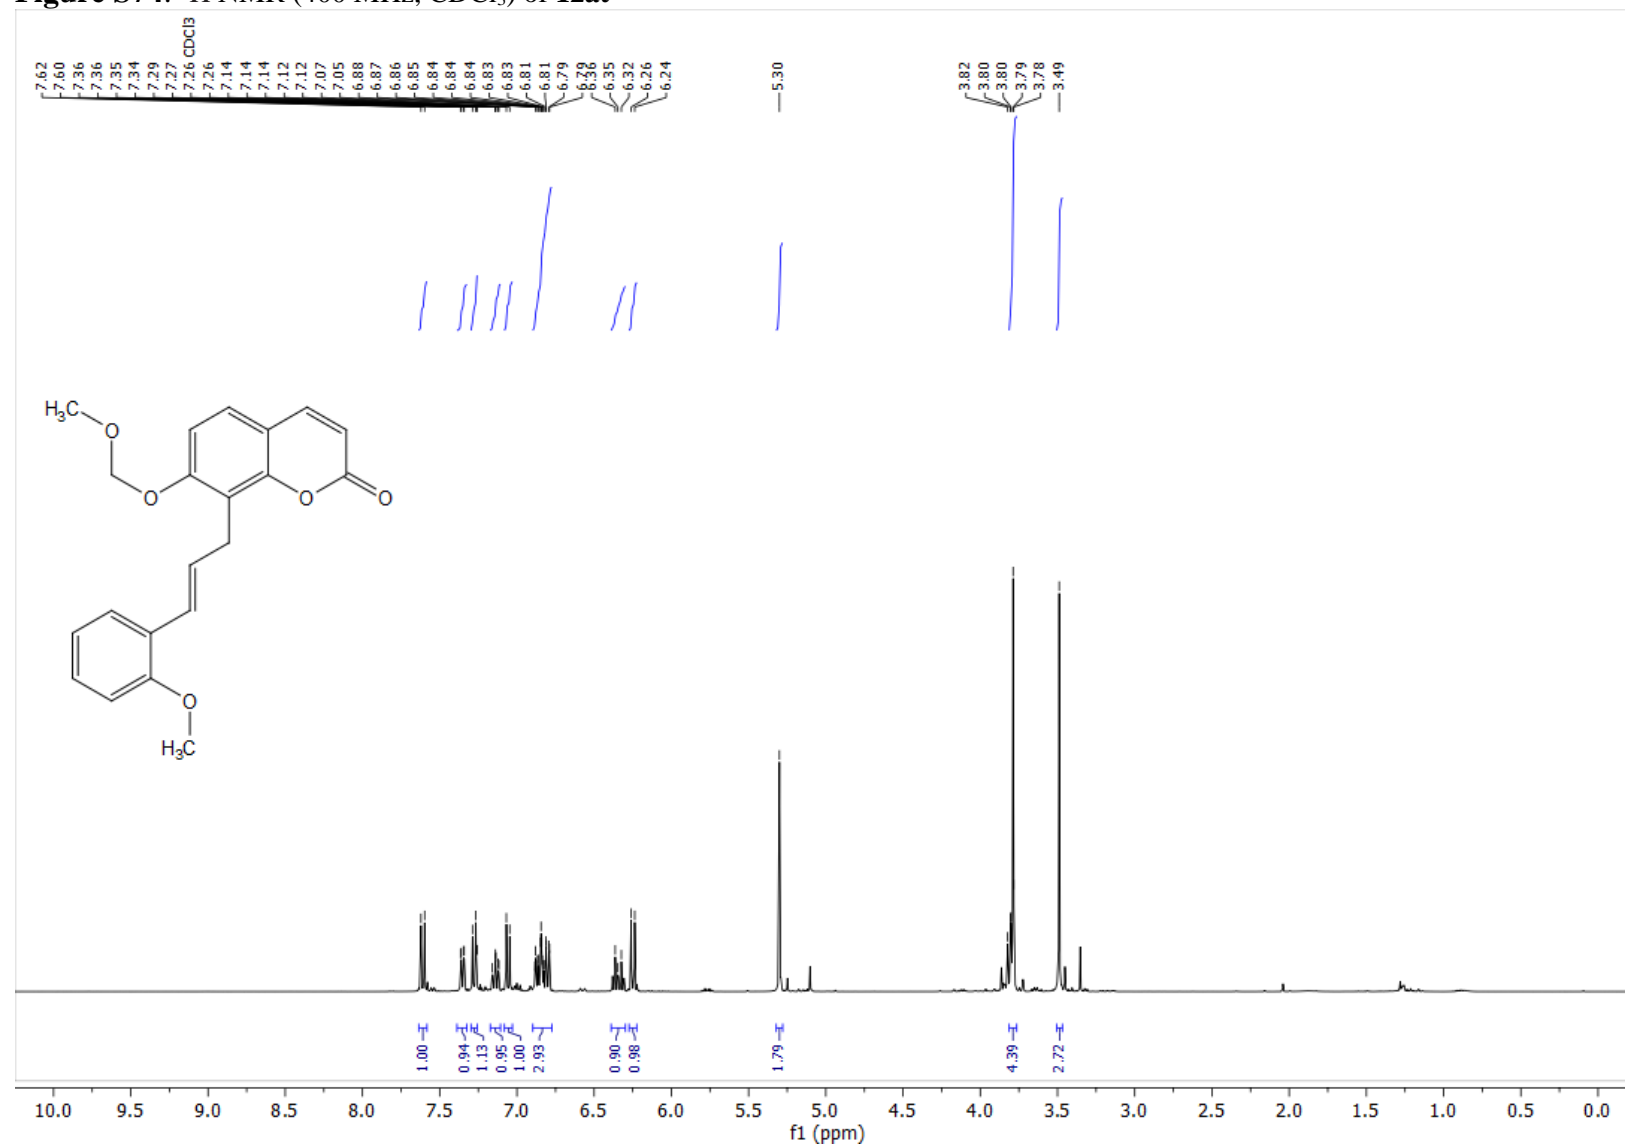

**Figure S75:**  $^{13}\text{C}\{^1\text{H}\}$  NMR (100 MHz,  $\text{CDCl}_3$ ) of **12at**

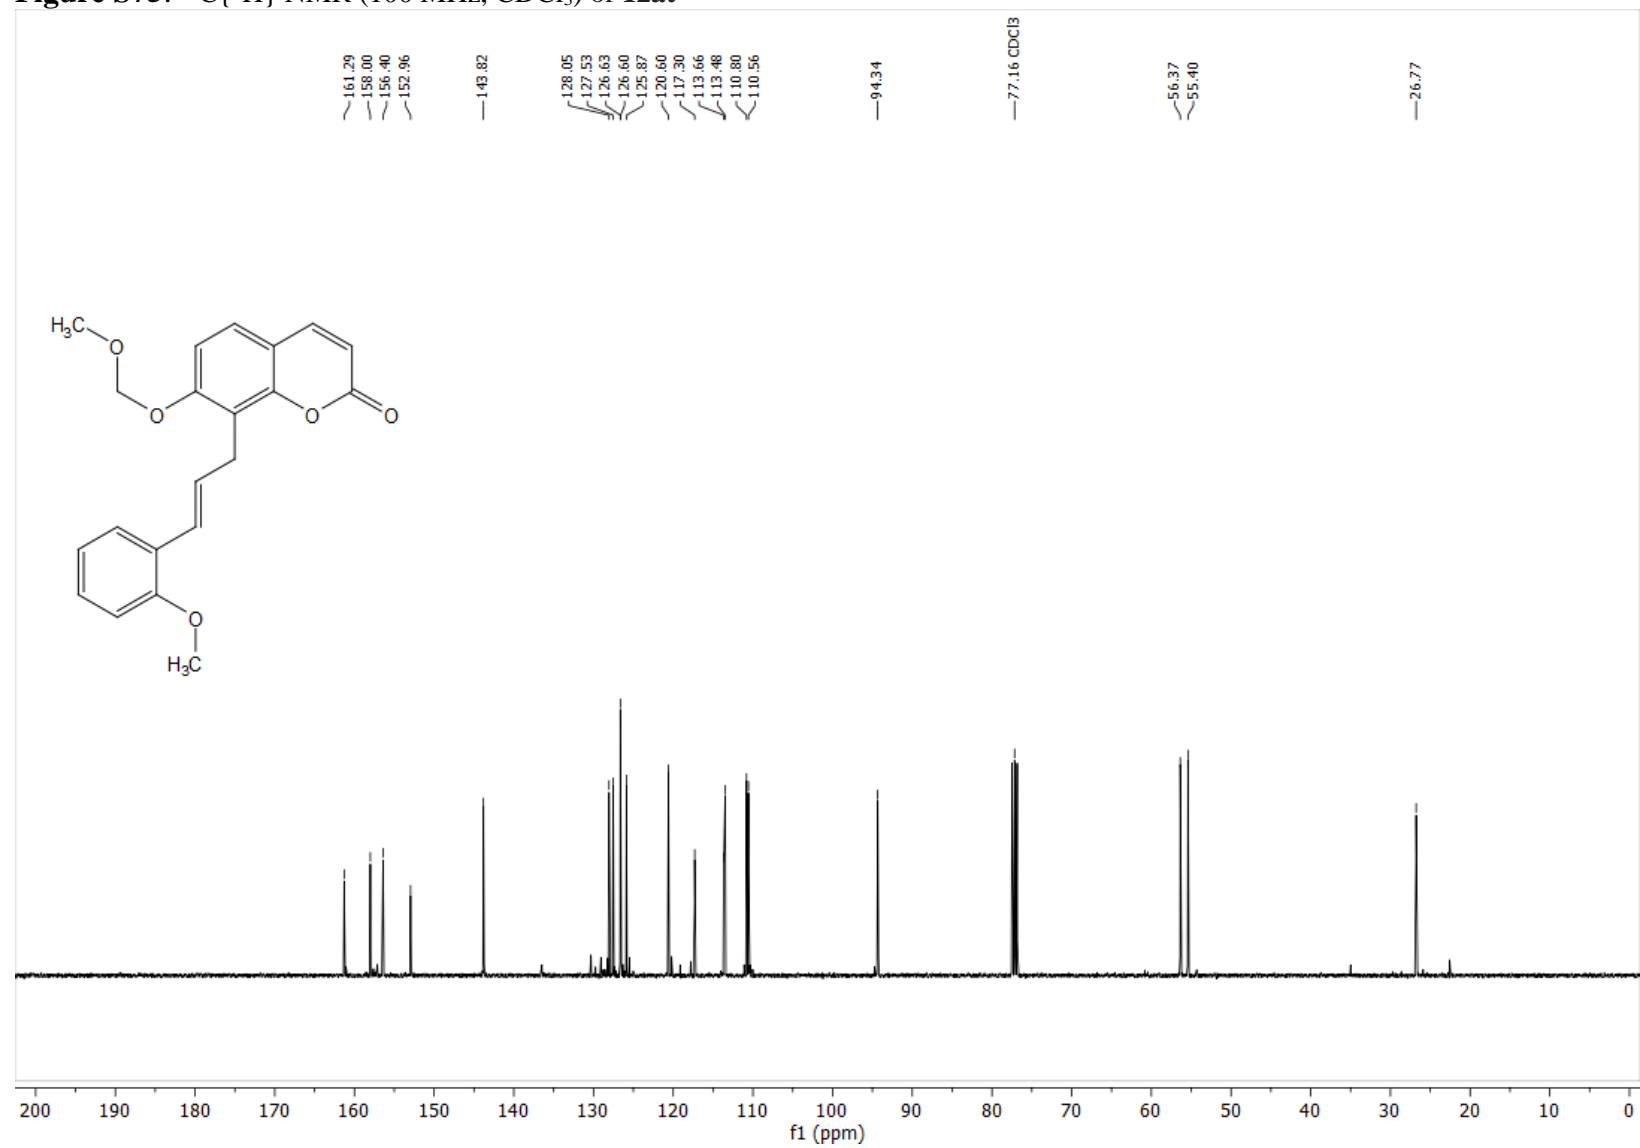

**Figure S76:** COSY (400 MHz, CDCl<sub>3</sub>) of **12at**

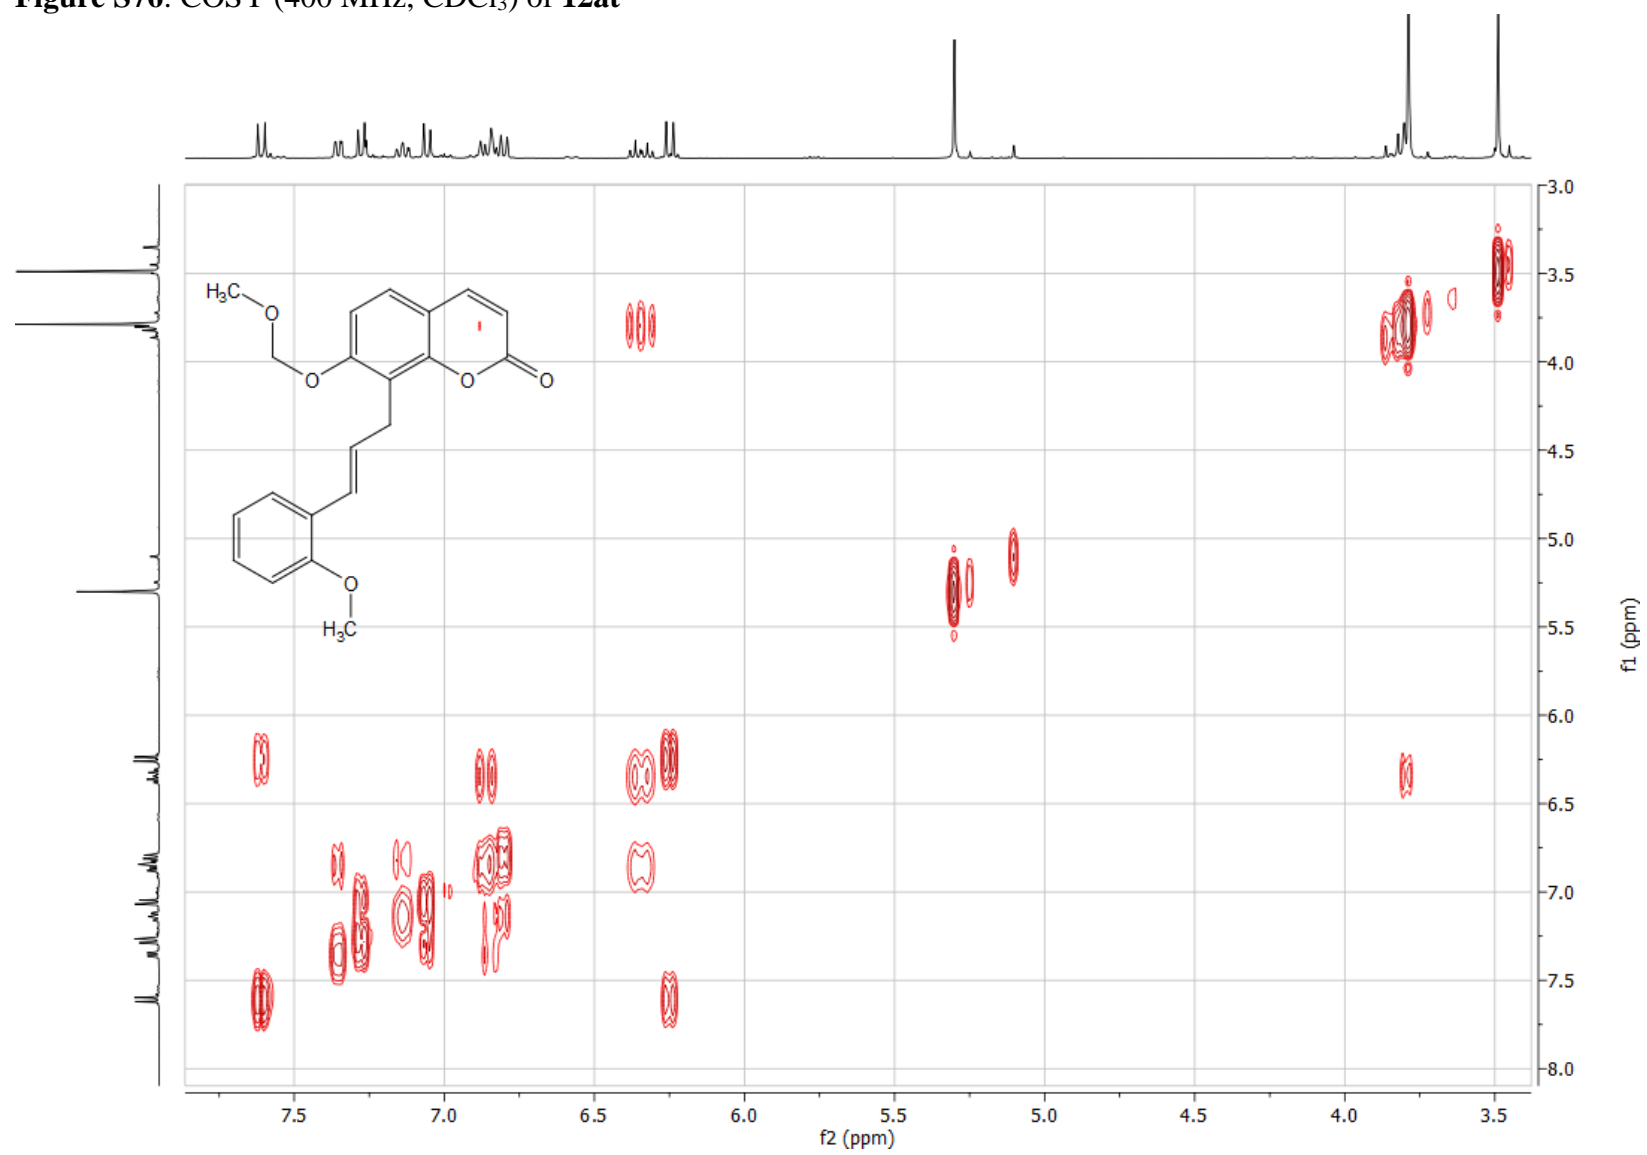

Figure S77: HSQC (400/100 MHz, CDCl<sub>3</sub>) of **12at**

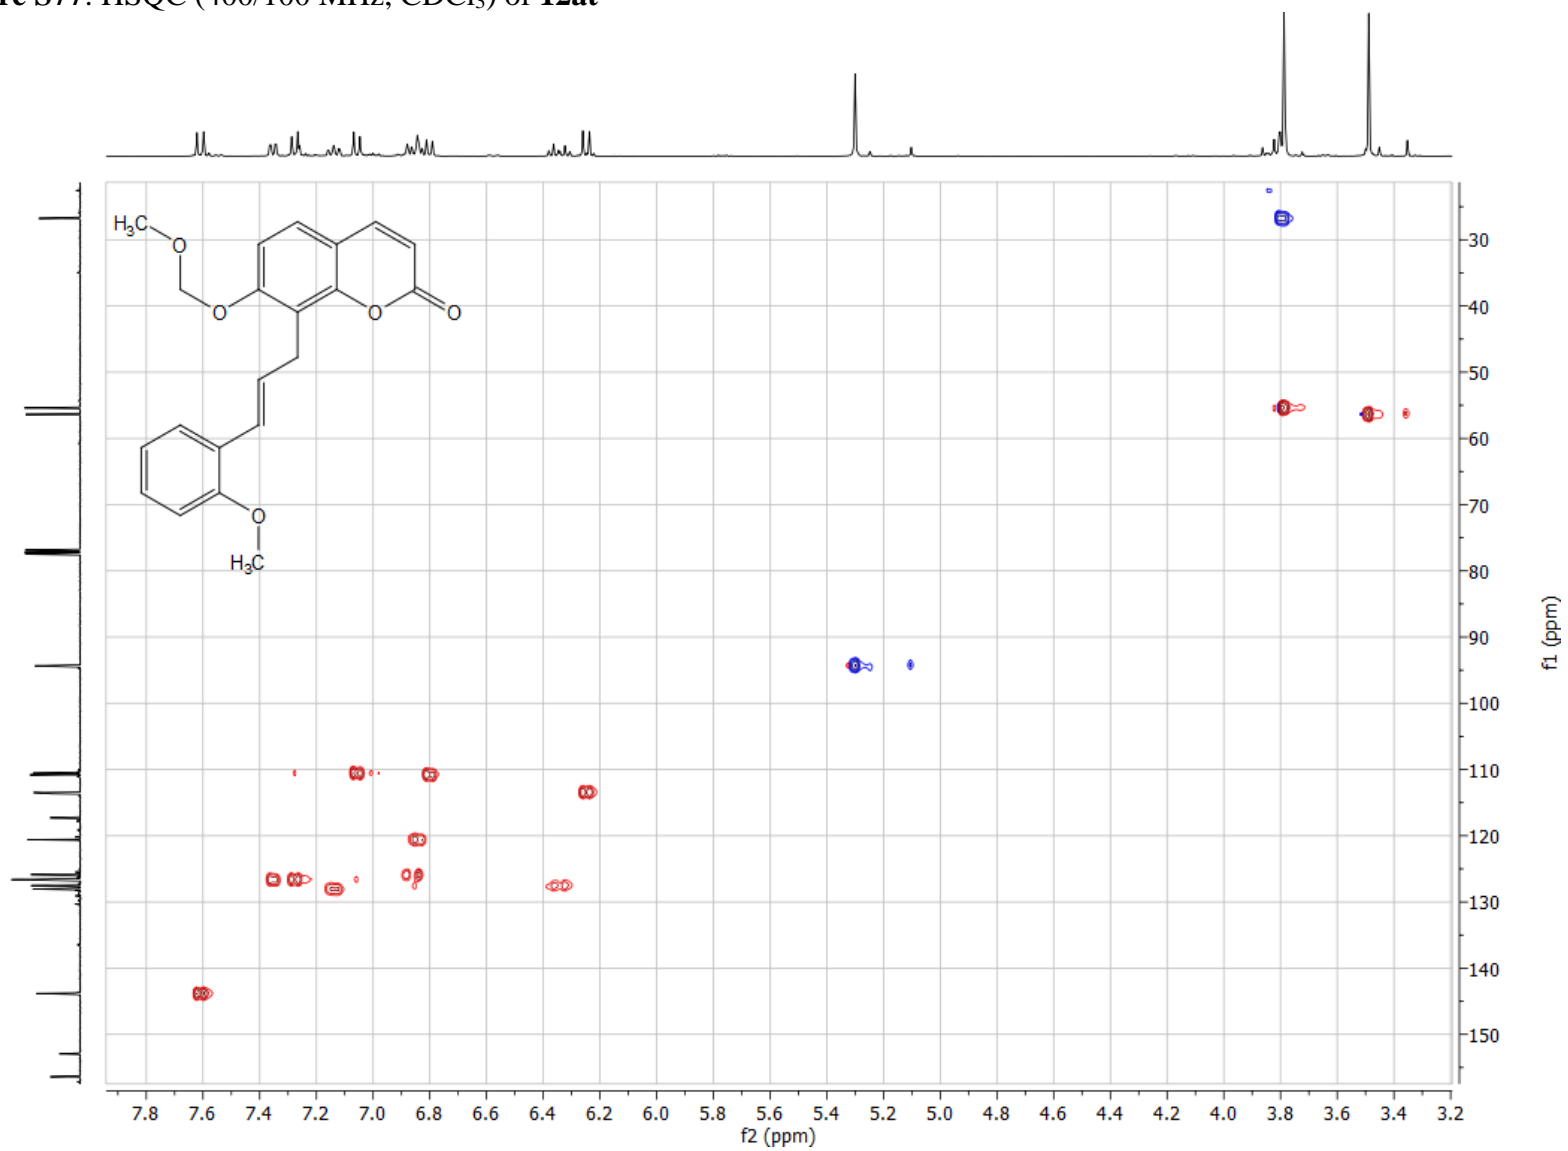



Figure S78: HMBC (400/100 MHz, CDCl<sub>3</sub>) of 12at

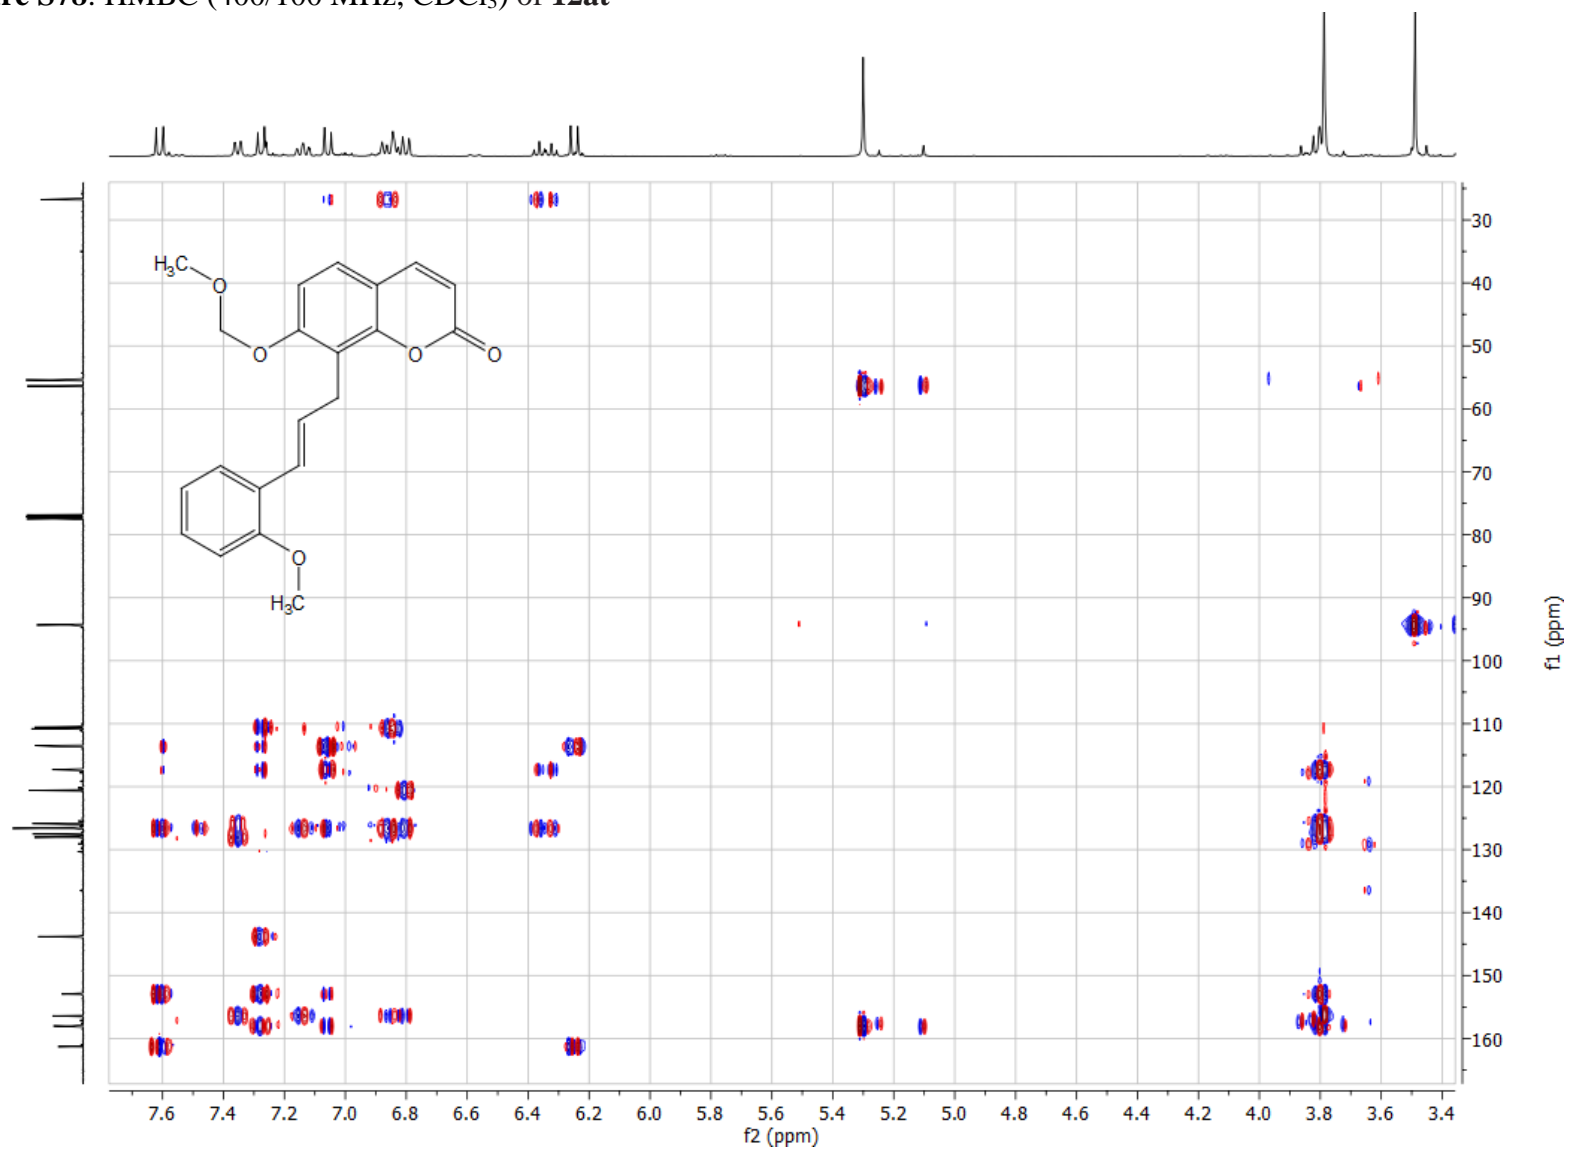

**Figure S79:** NOESY (400 MHz, CDCl<sub>3</sub>) of **12at**

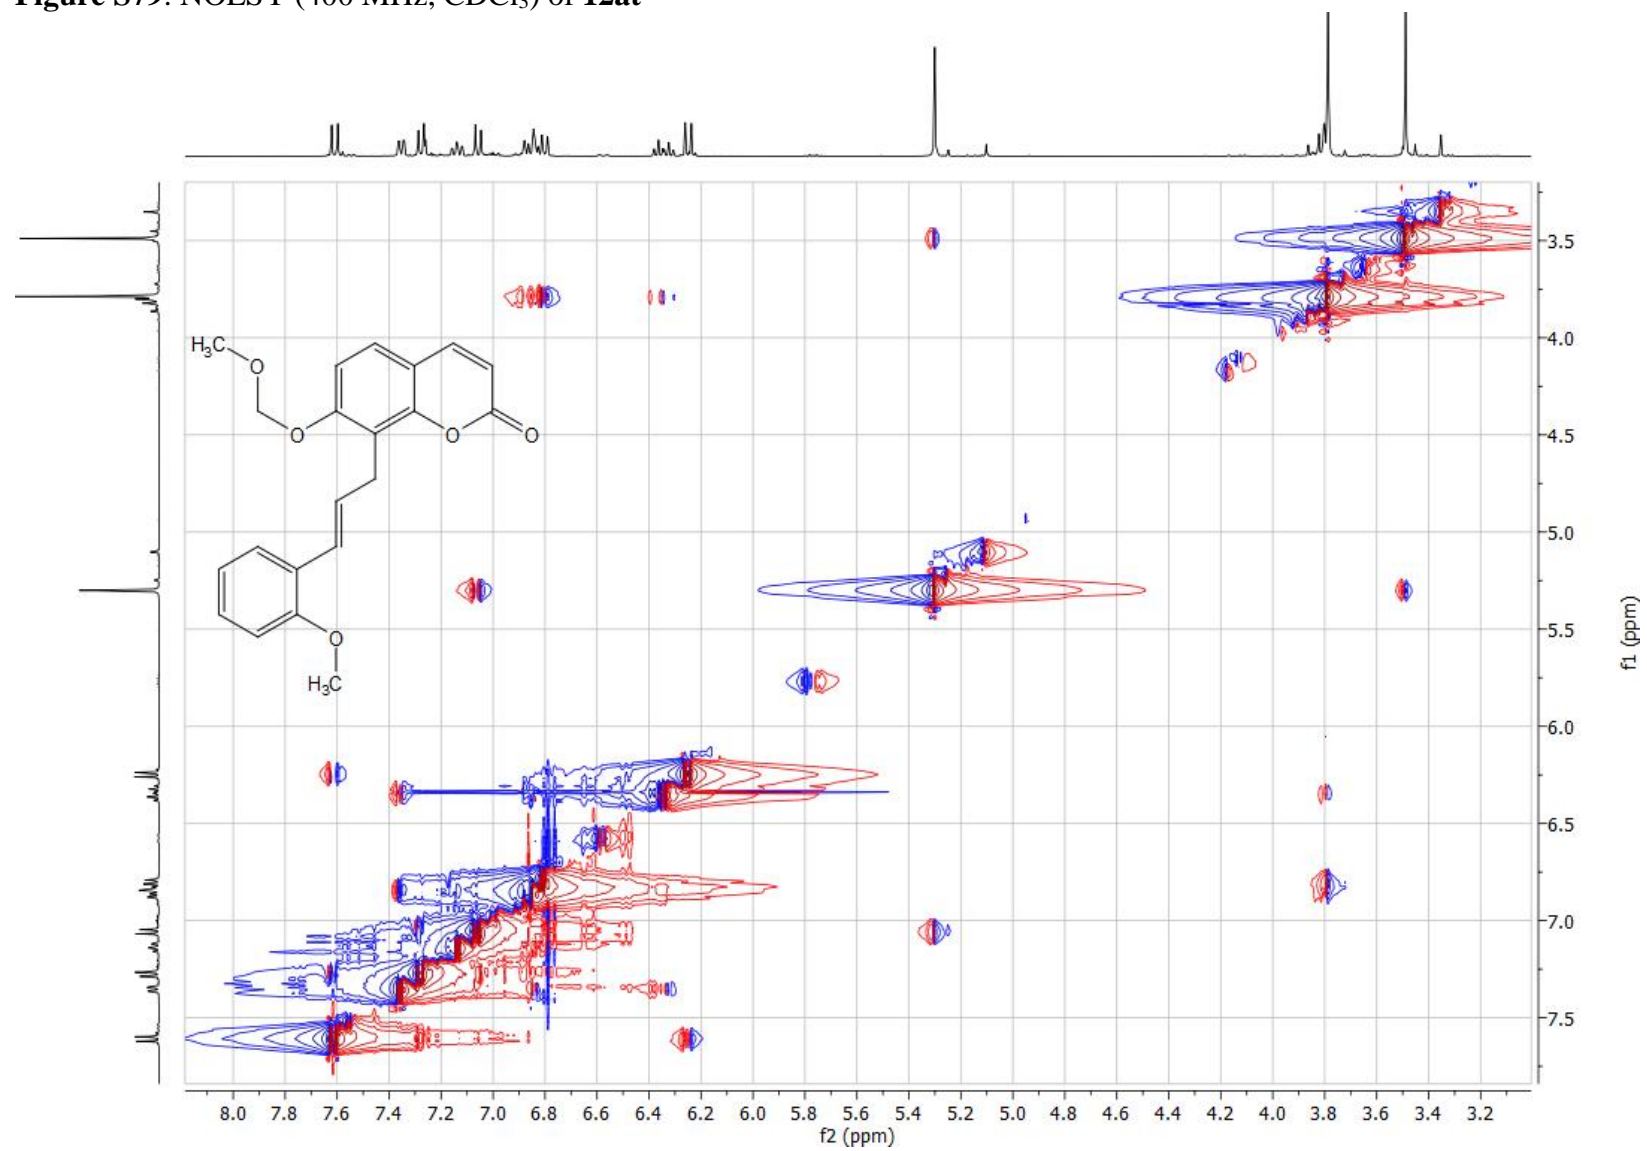

**Figure S80:**  $^1\text{H}$  NMR (400 MHz,  $\text{CDCl}_3$ ) of **12au**

NEO400\_2023-0330\_mak.20.fid

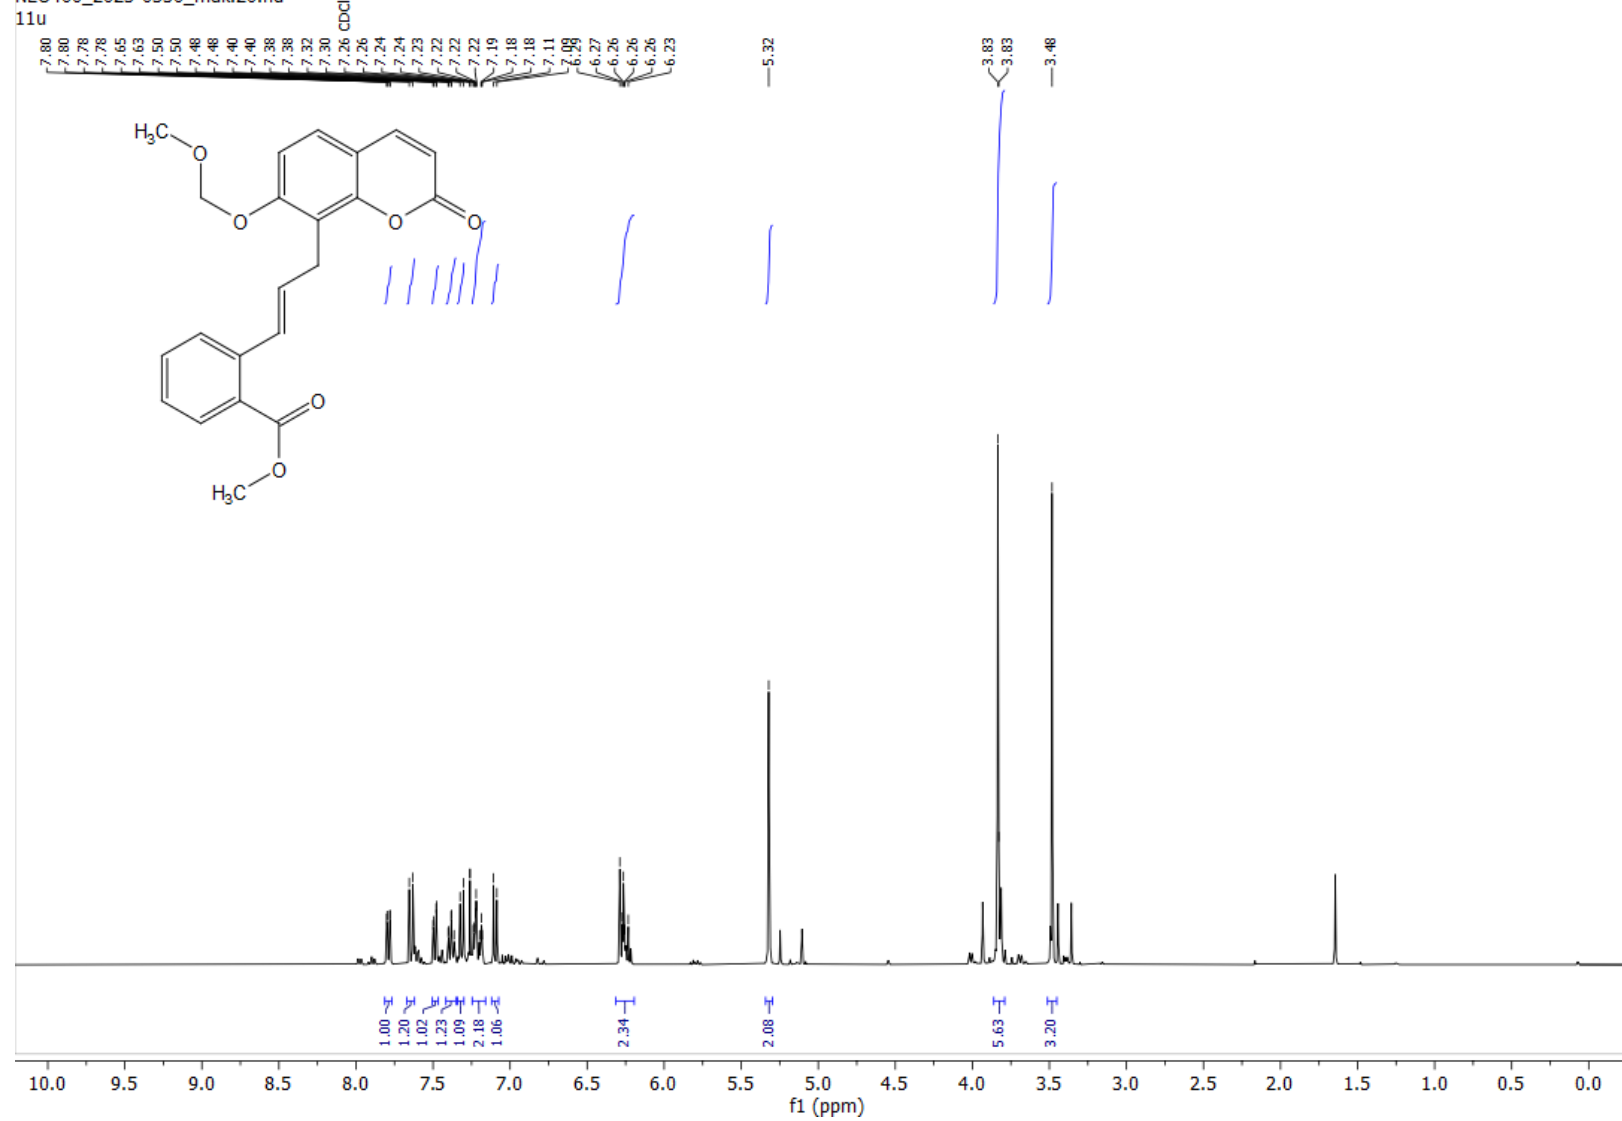

**Figure S81:**  $^{13}\text{C}\{^1\text{H}\}$  NMR (100 MHz,  $\text{CDCl}_3$ ) of **12au**

NEO400\_2023-0330\_mak.21.fid

11u

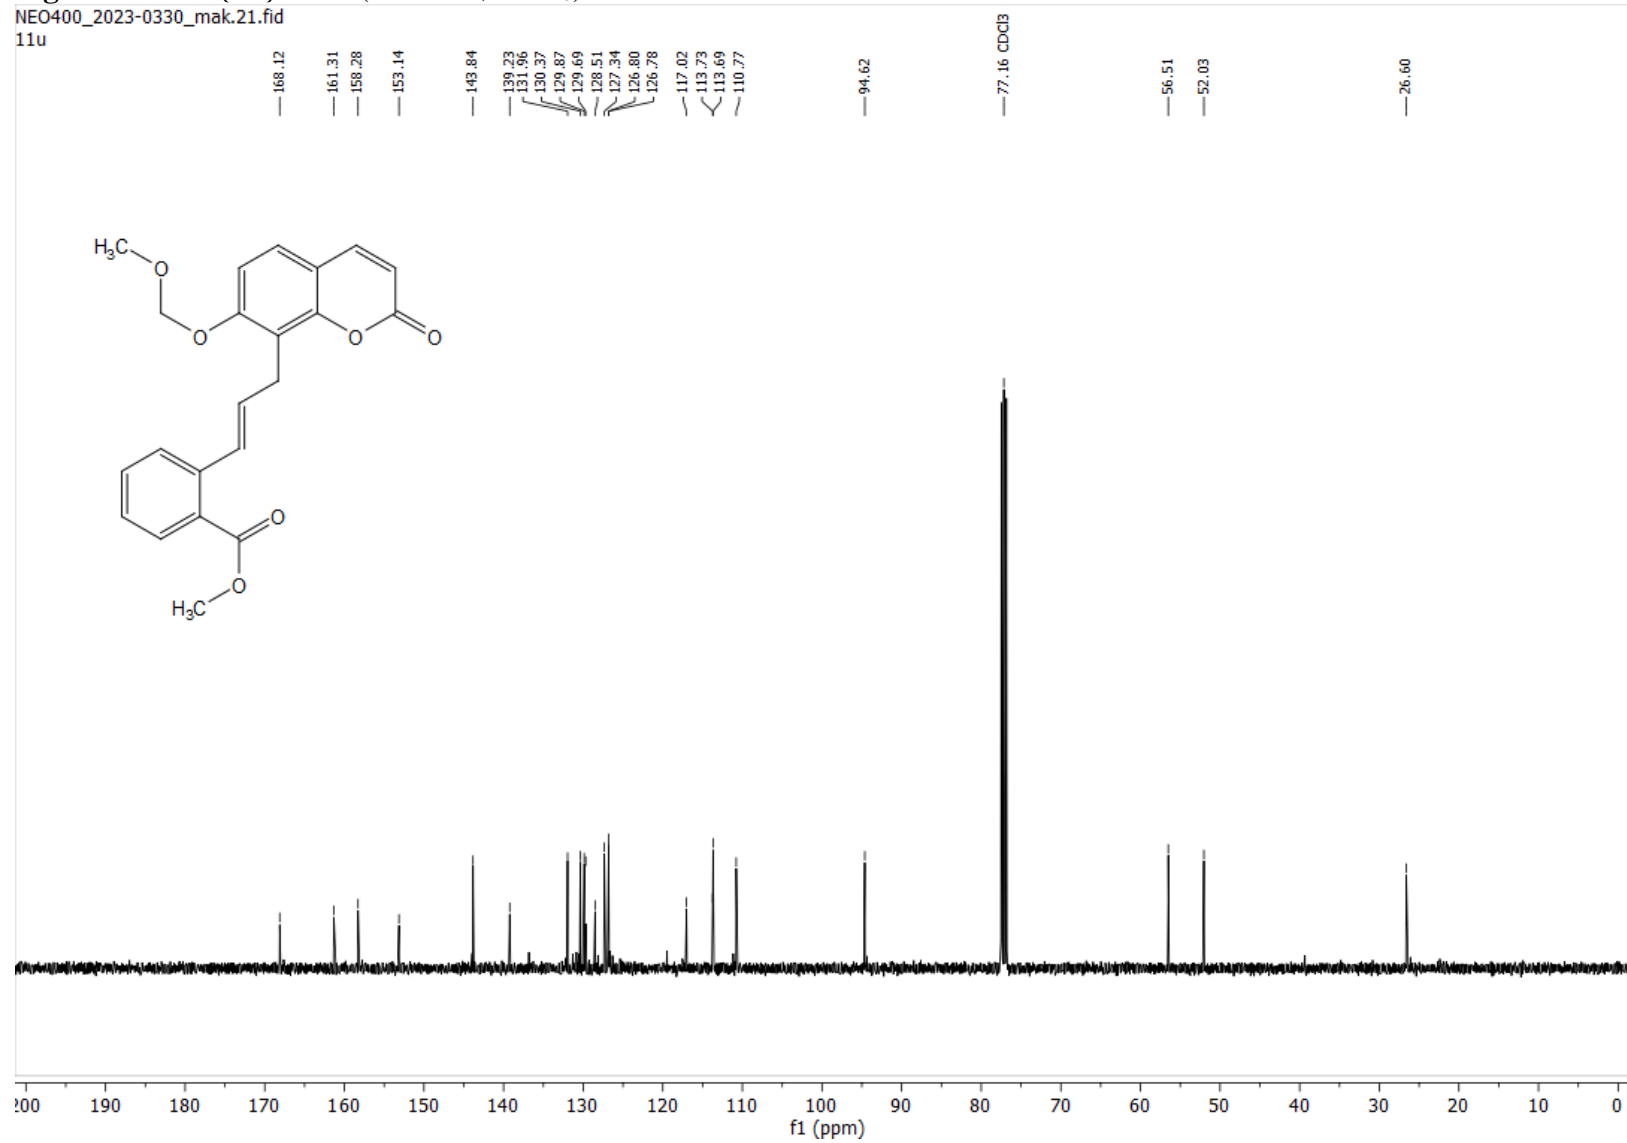

**Figure S82:**  $^1\text{H}$  NMR (400 MHz,  $\text{CDCl}_3$ ) of **13aa**

NEO400\_2023-1117\_mak.50.fid

696s

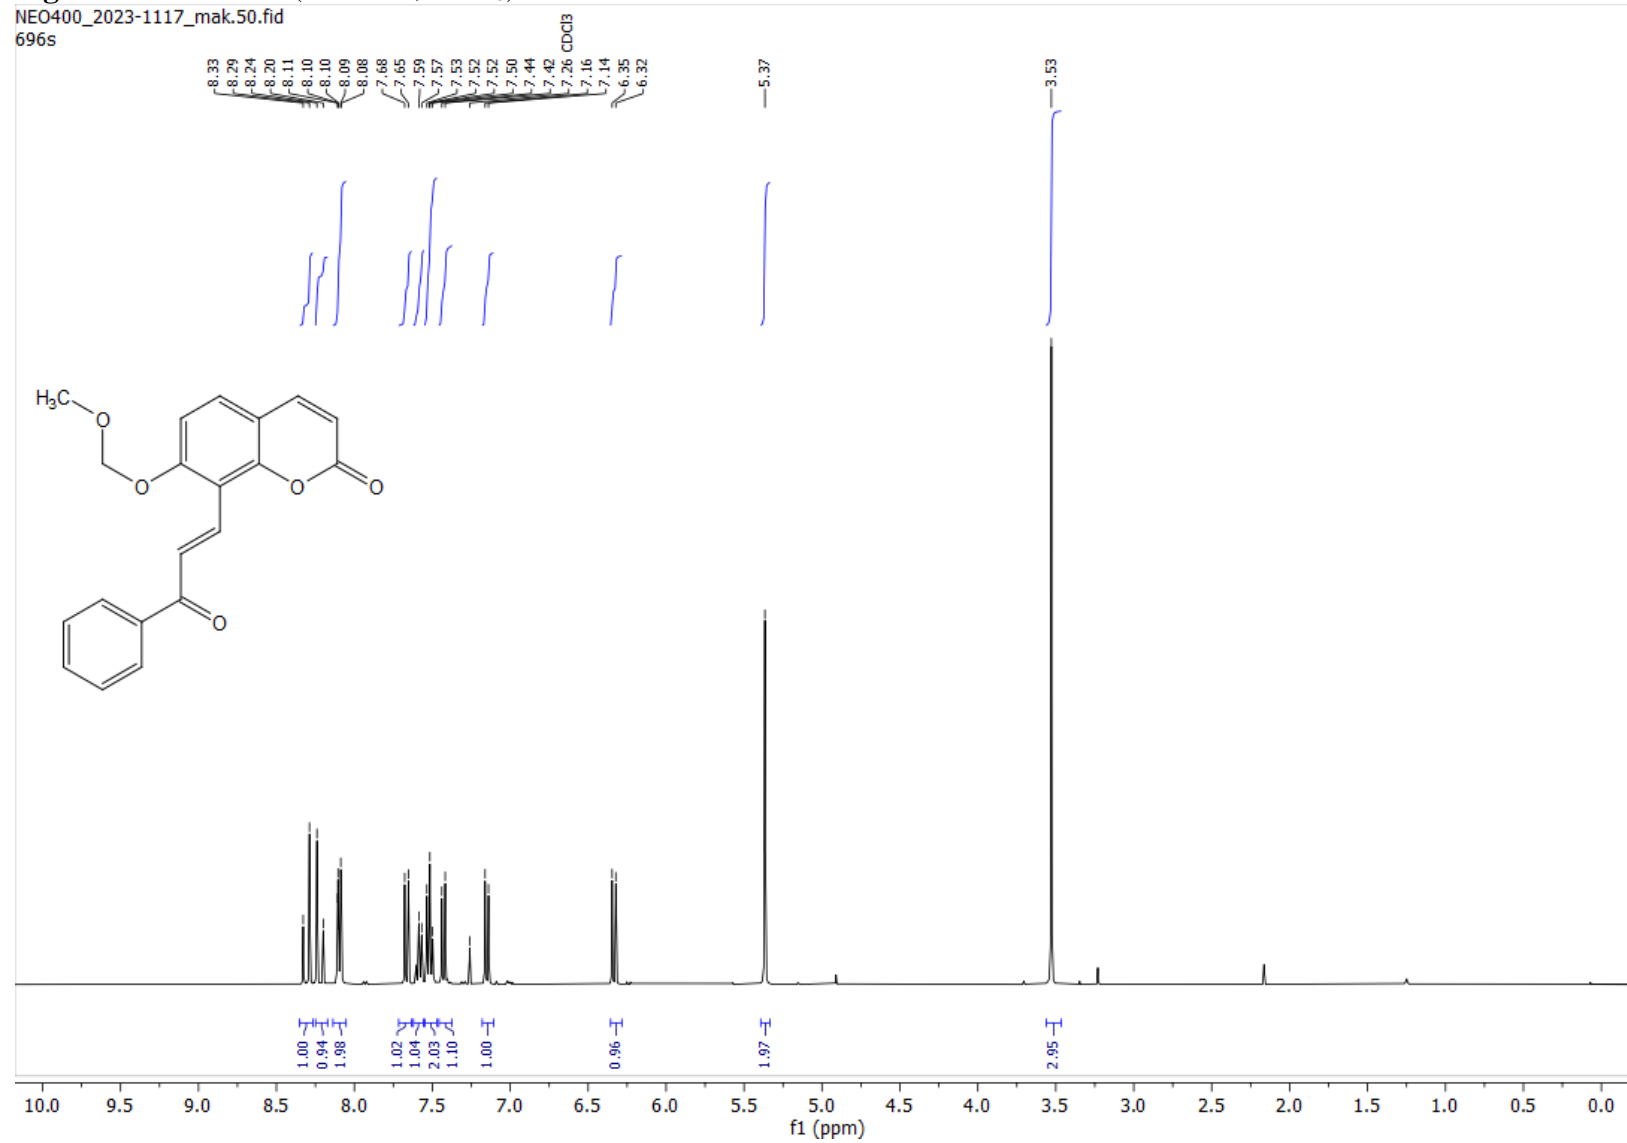

**Figure S83:**  $^{13}\text{C}\{^1\text{H}\}$  NMR (100 MHz,  $\text{CDCl}_3$ ) of **13aa**

NEO400\_2023-1117\_mak.51.fid

696s

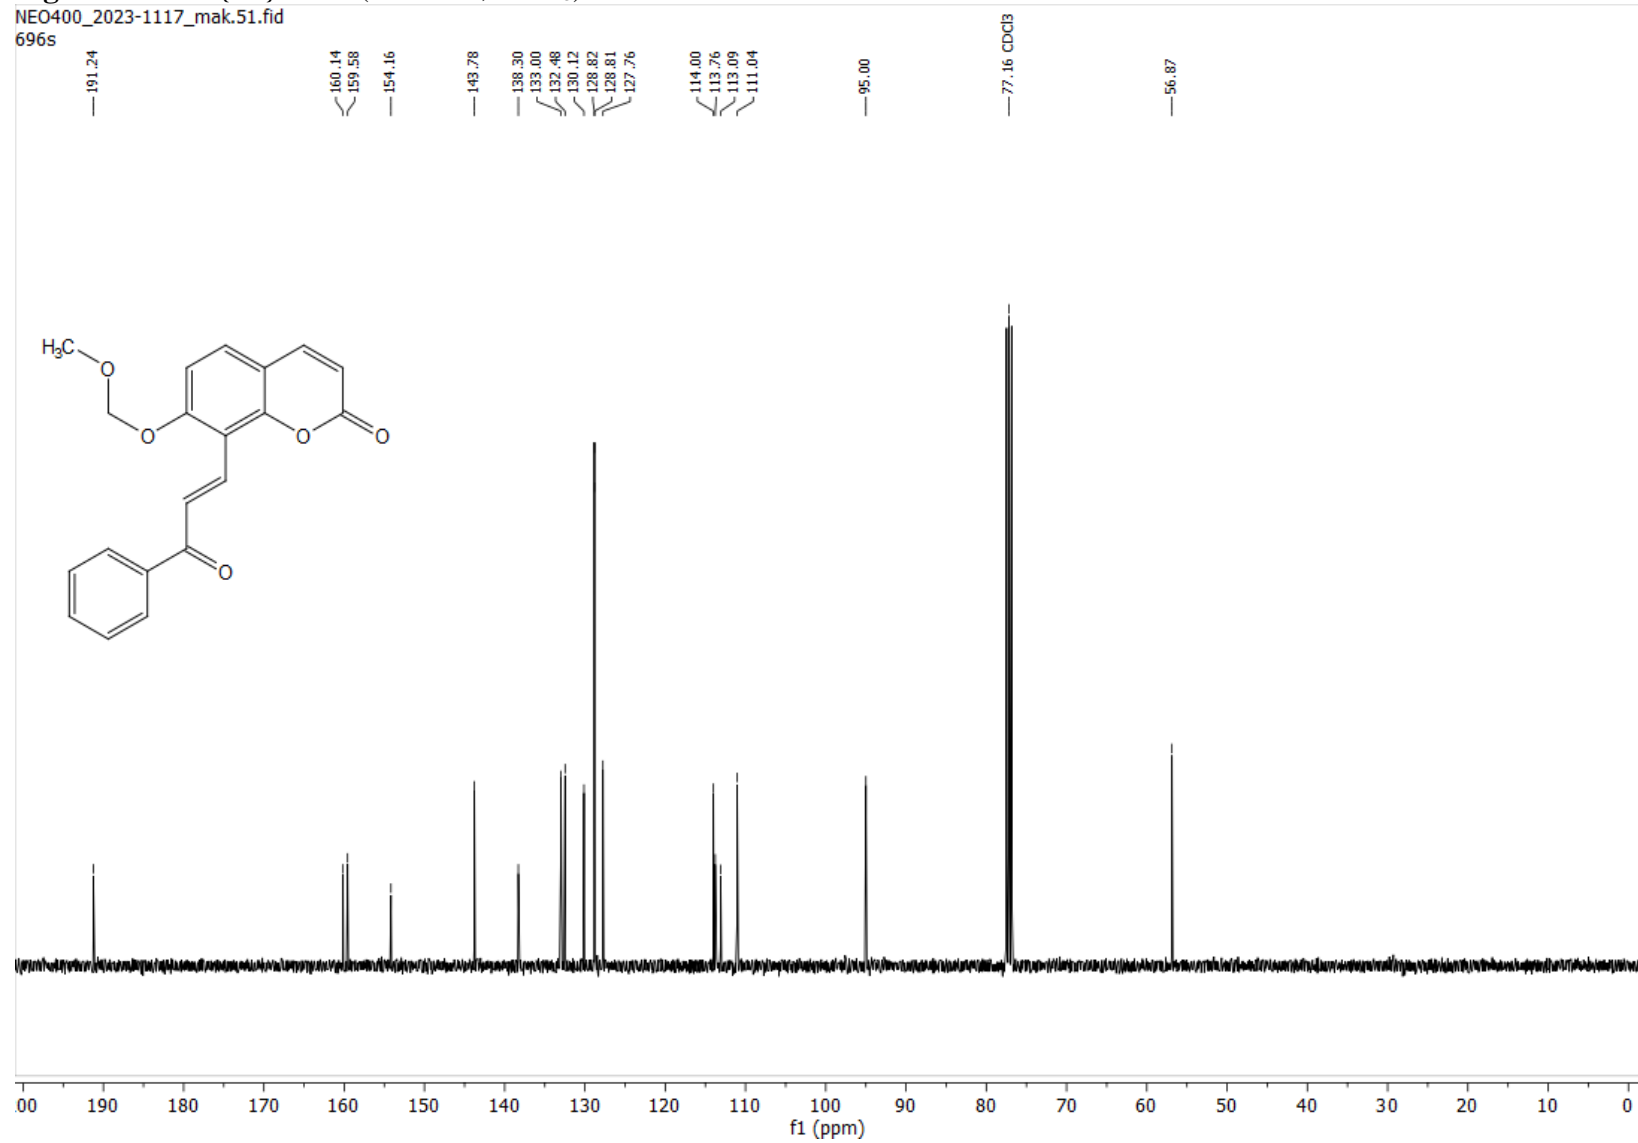

**Figure S84:** COSY (400 MHz, CDCl<sub>3</sub>) of **13aa**

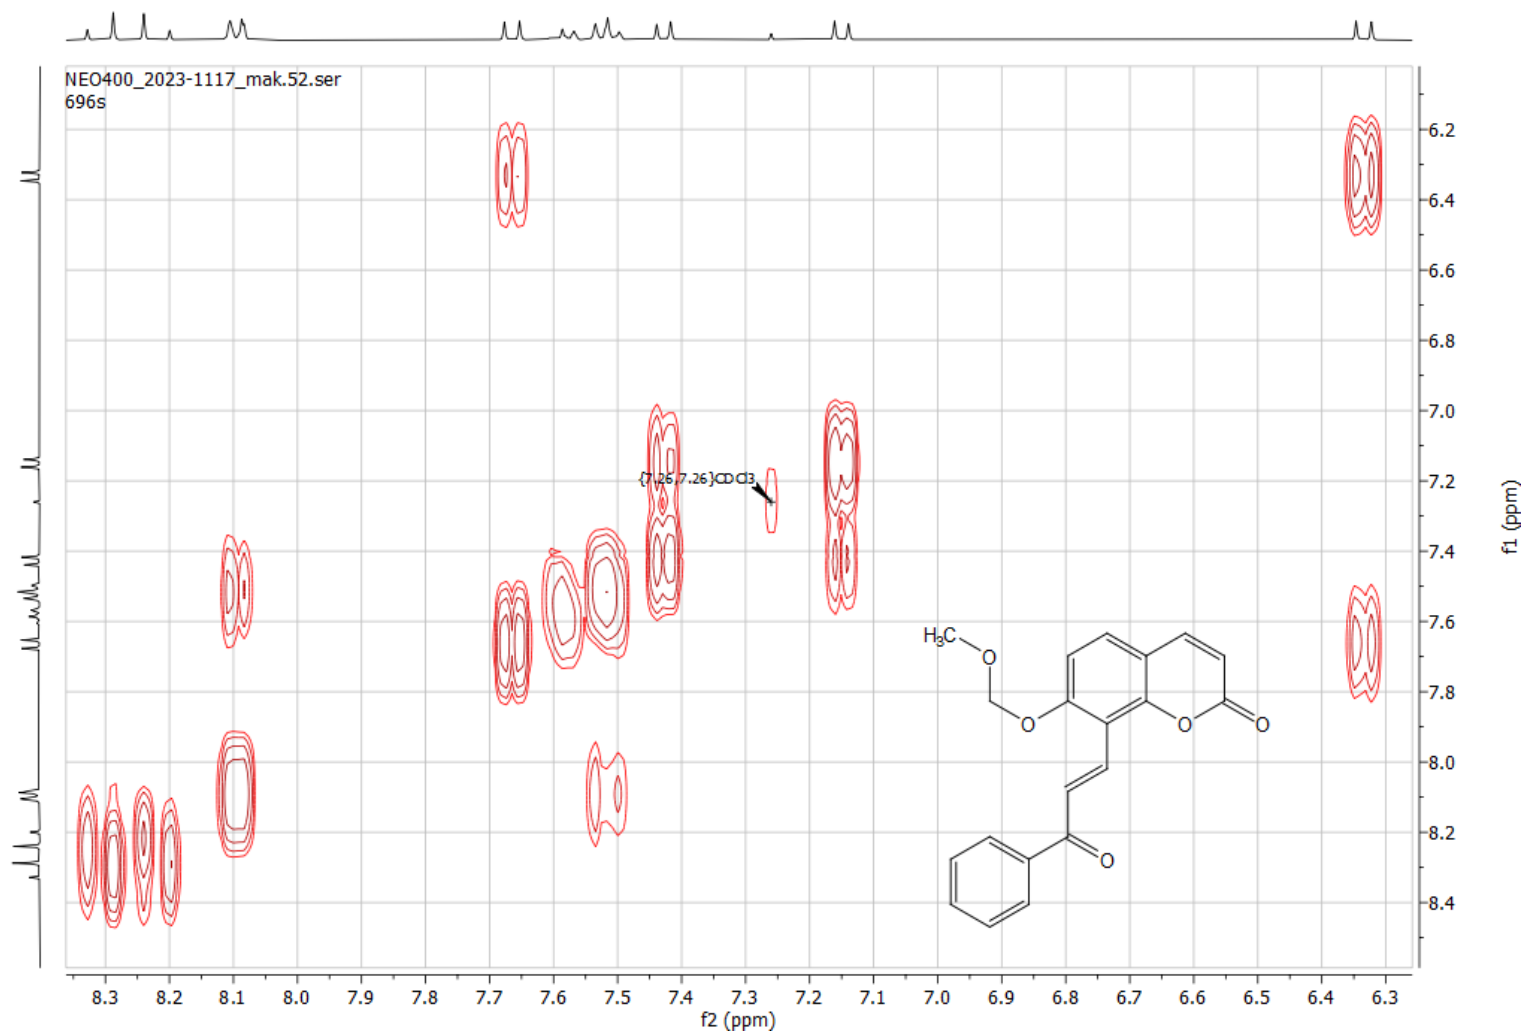

Figure S85: HSQC (400/100 MHz, CDCl<sub>3</sub>) of **13aa**

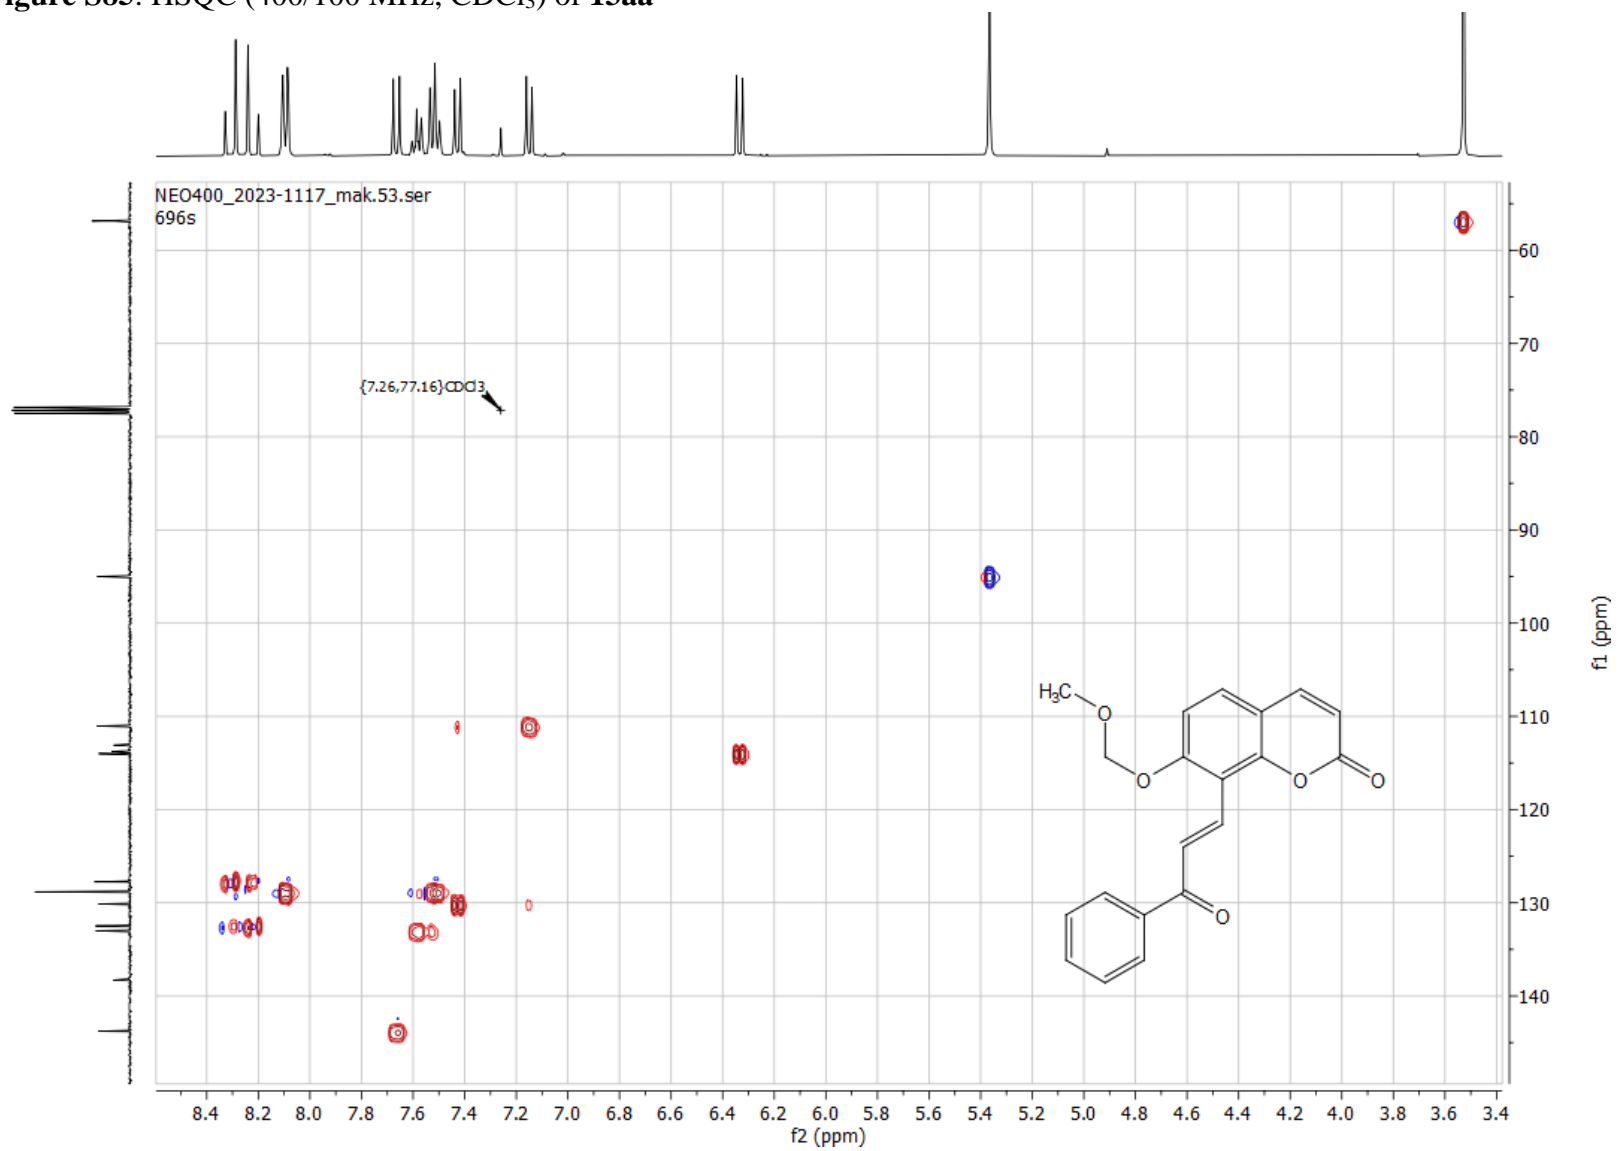



Figure S86: HMBC (400/100 MHz, CDCl<sub>3</sub>) of 13aa

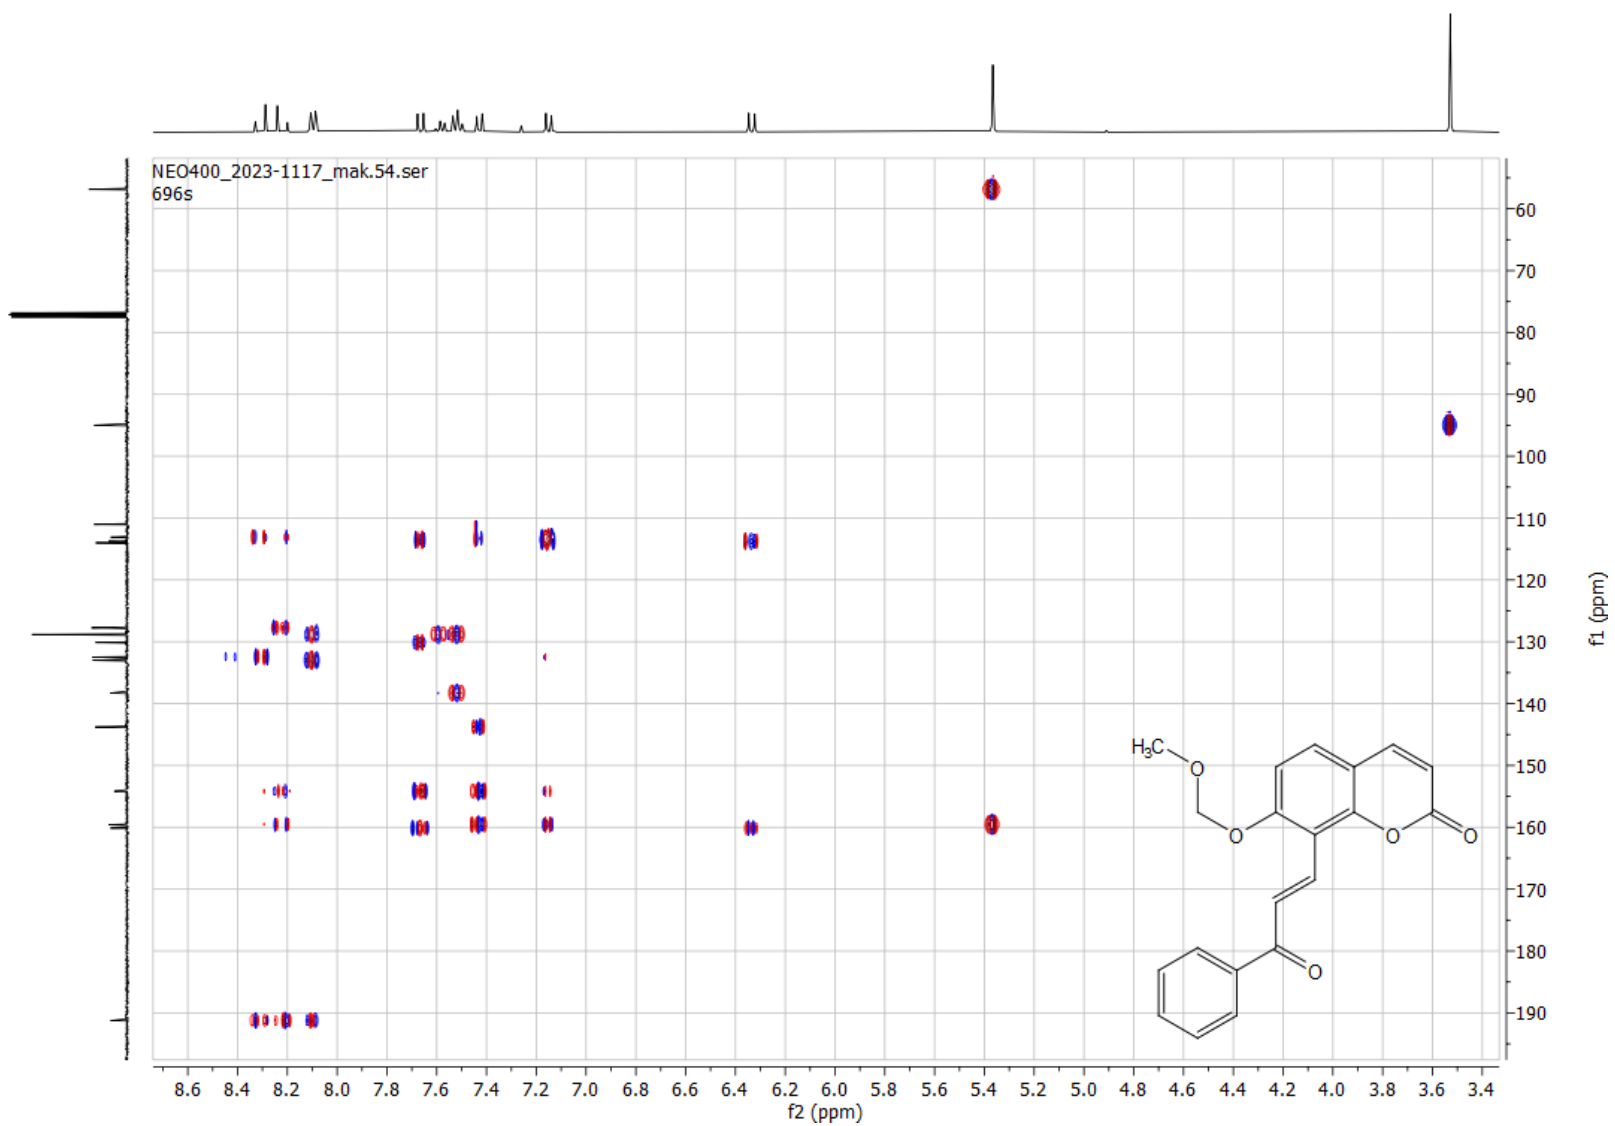

**Figure S87:** NOESY (400 MHz, CDCl<sub>3</sub>) of **13aa**

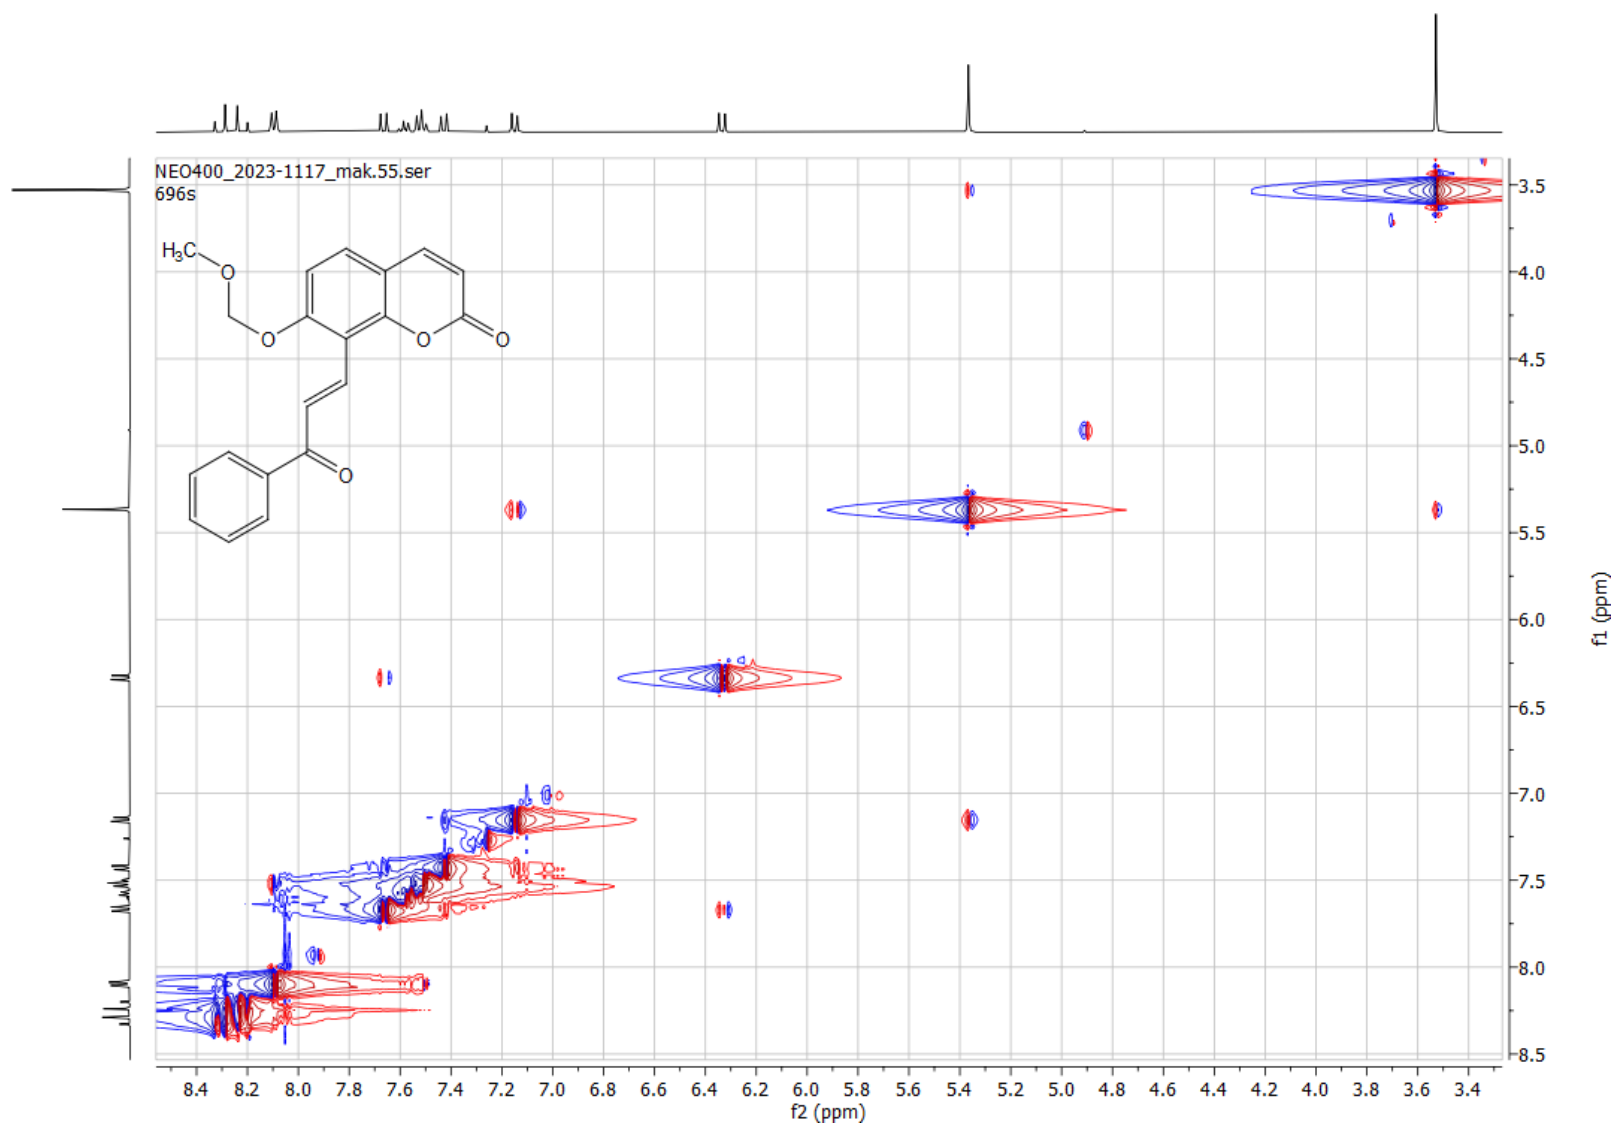

**Figure S88:**  $^1\text{H}$  NMR (400 MHz,  $\text{CDCl}_3$ ) of **13ab**

702sf2.20.fid  
702sf2

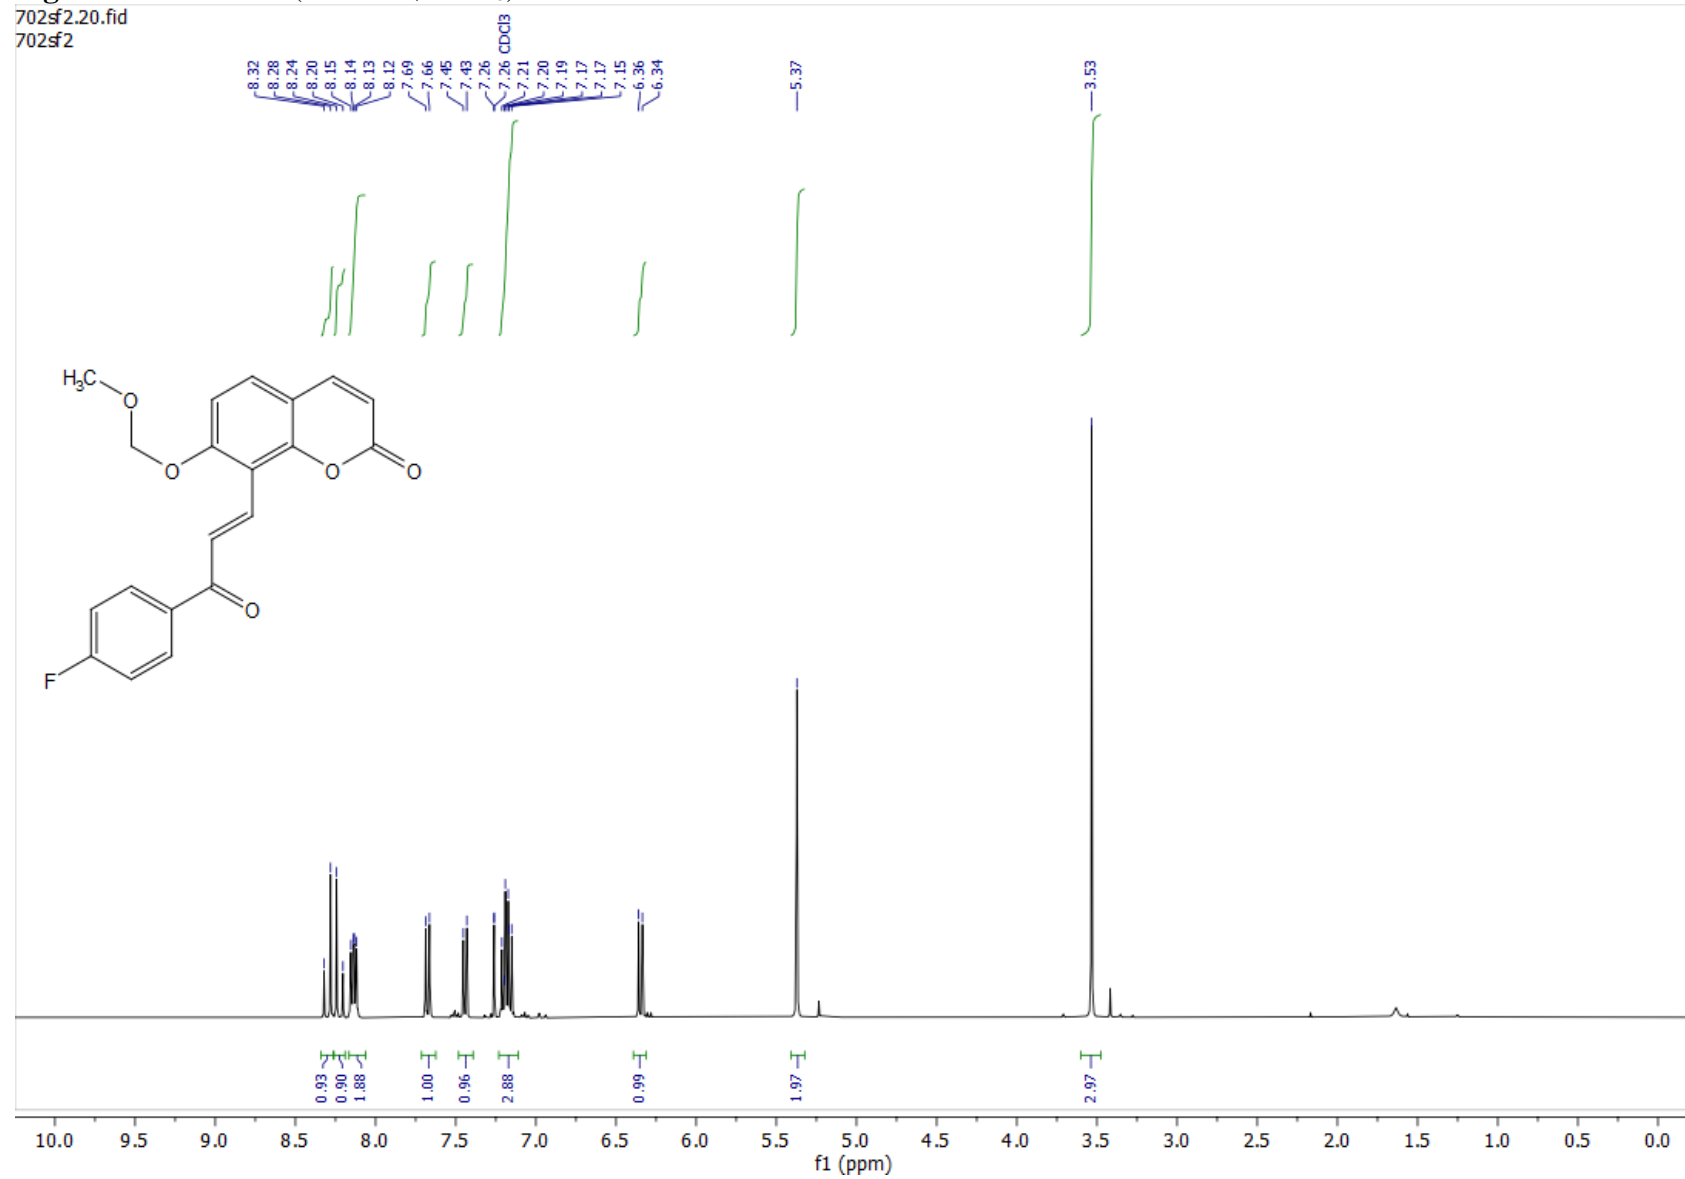

**Figure S89:**  $^{13}\text{C}\{^1\text{H}\}$  NMR (100 MHz,  $\text{CDCl}_3$ ) of **13ab**

Desktop/13ab-C  
702sf2

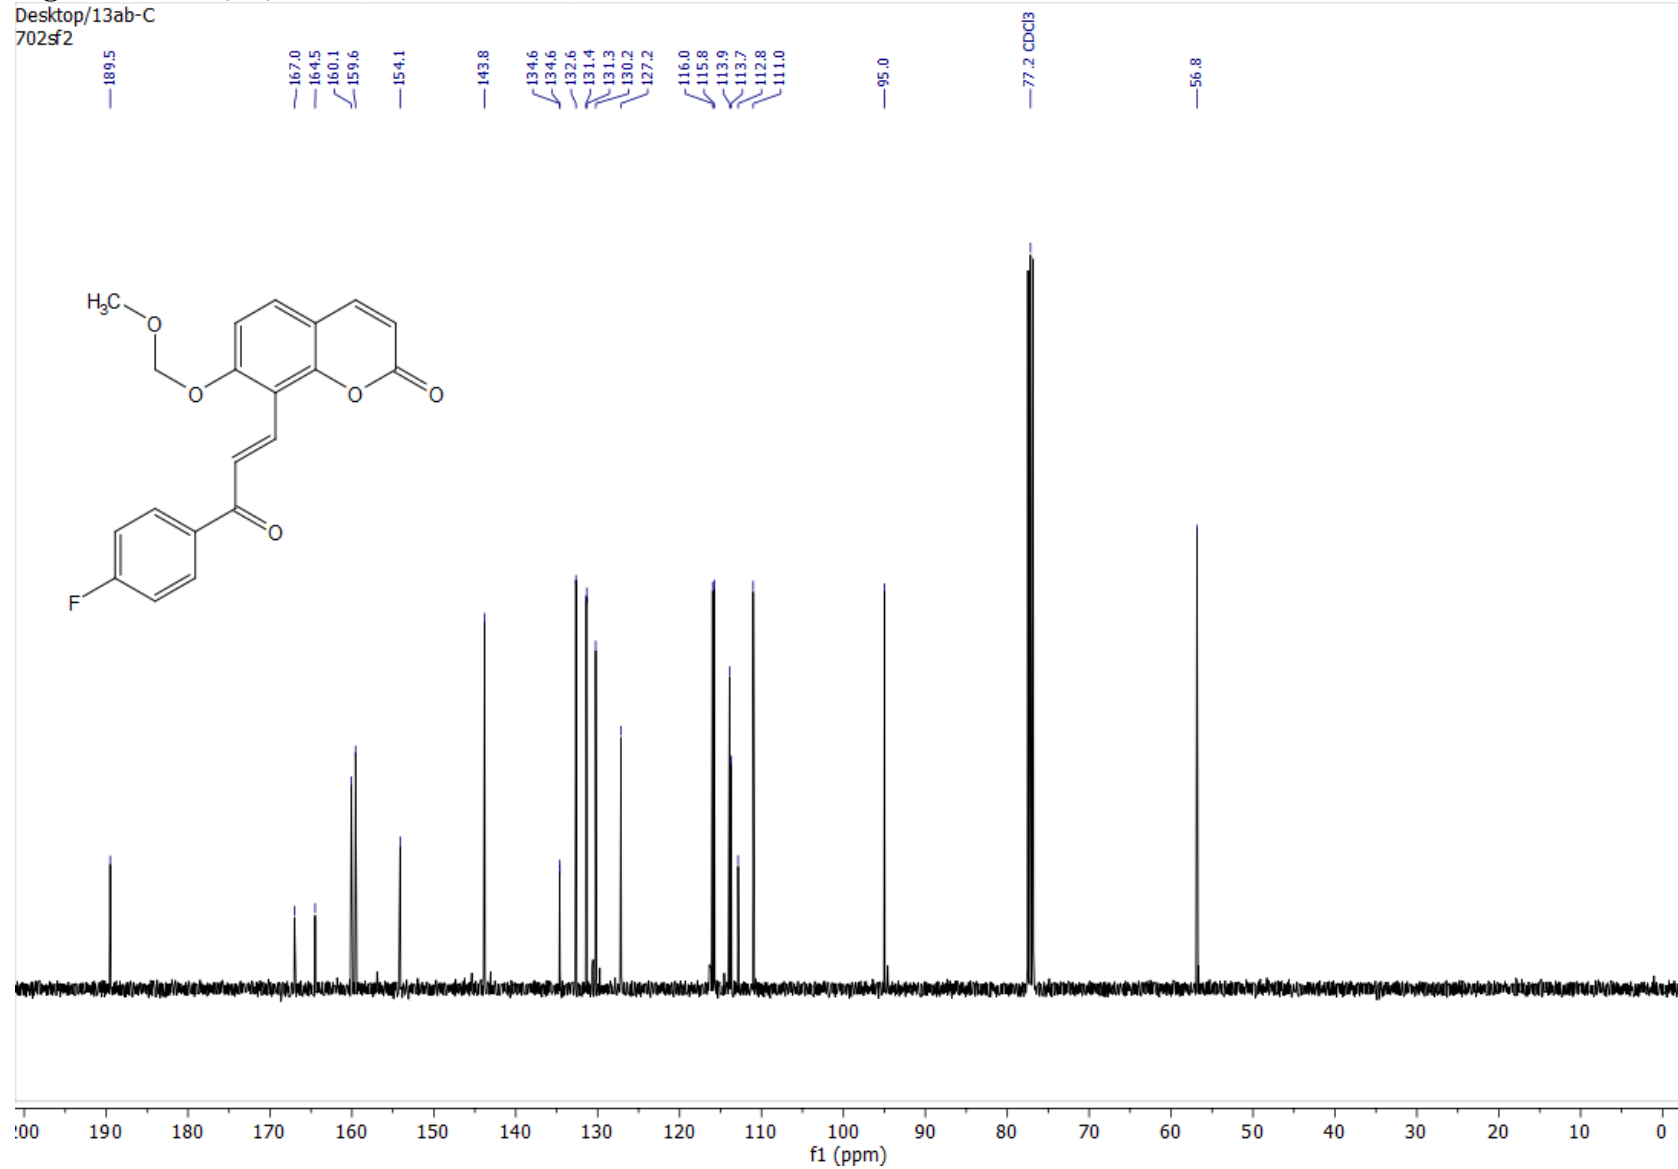

**Figure S90:**  $^1\text{H}$  NMR (400 MHz,  $\text{CDCl}_3$ ) of **13ac**

NEO400\_2024-0327\_mak.20.fid  
704s

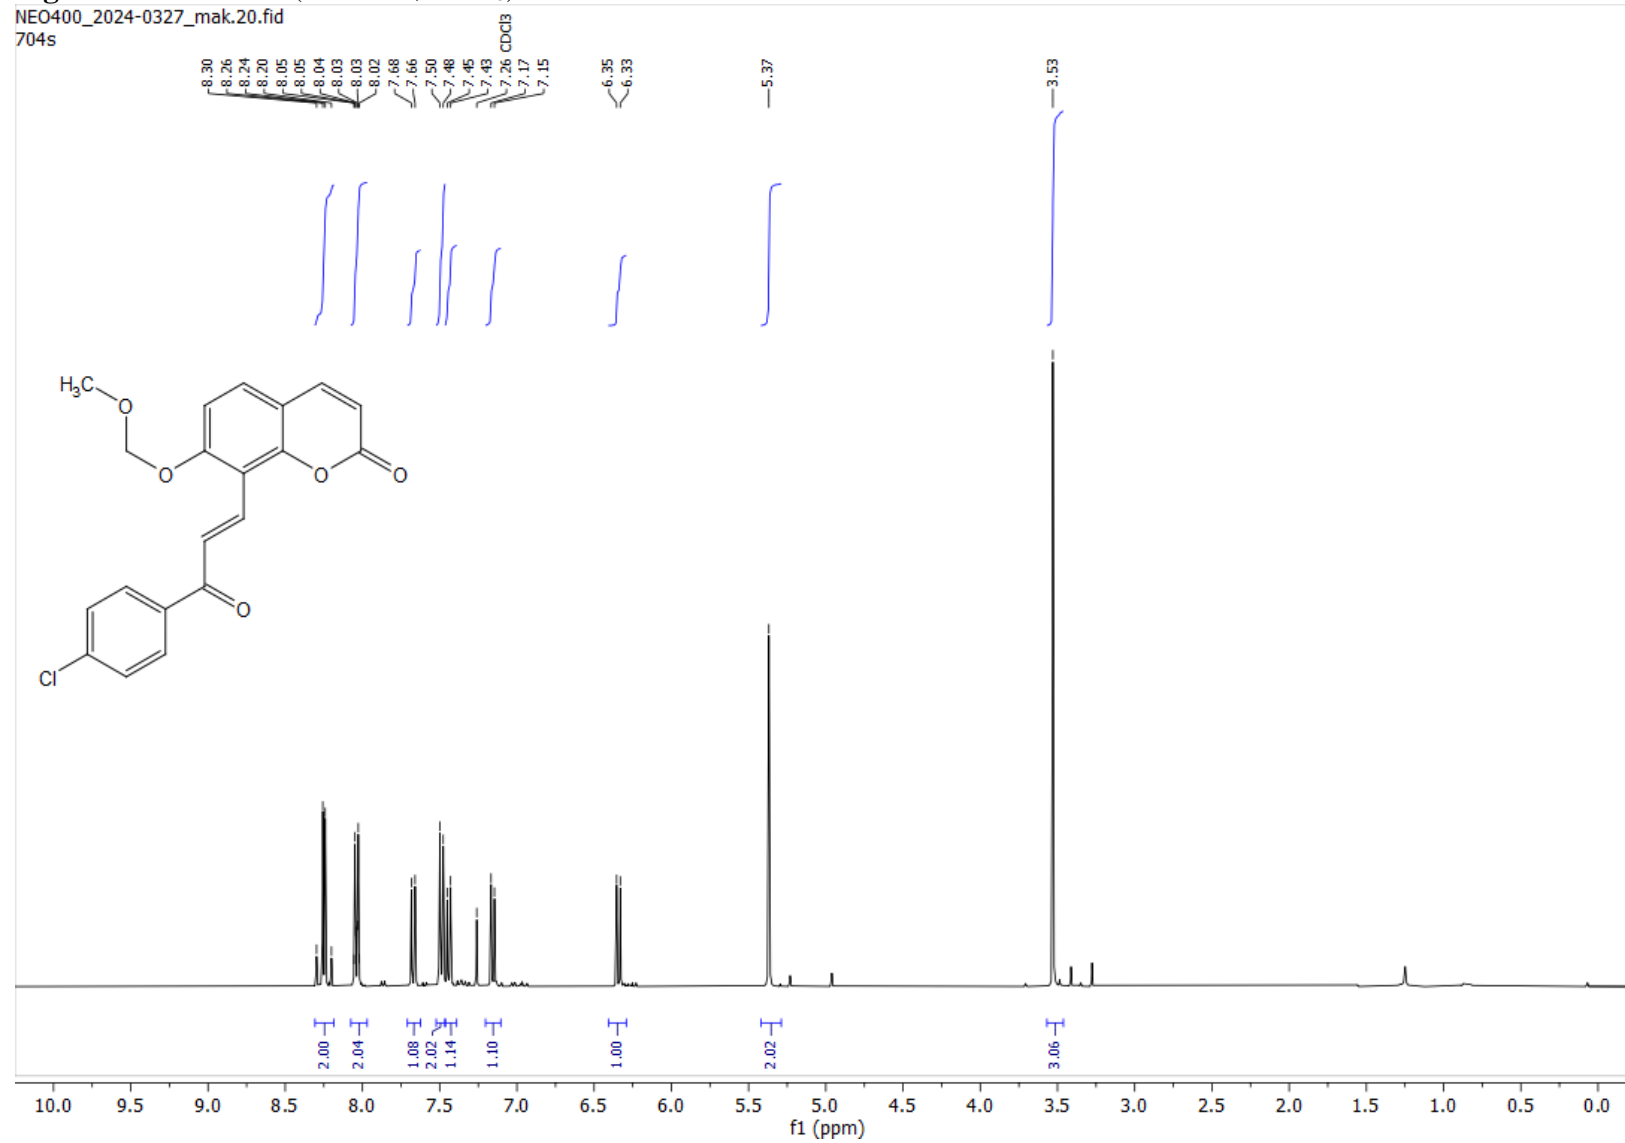

**Figure S91:**  $^{13}\text{C}\{^1\text{H}\}$  NMR (100 MHz,  $\text{CDCl}_3$ ) of **13ac**

NEO400\_2024-0327\_mak.21.fid  
704s

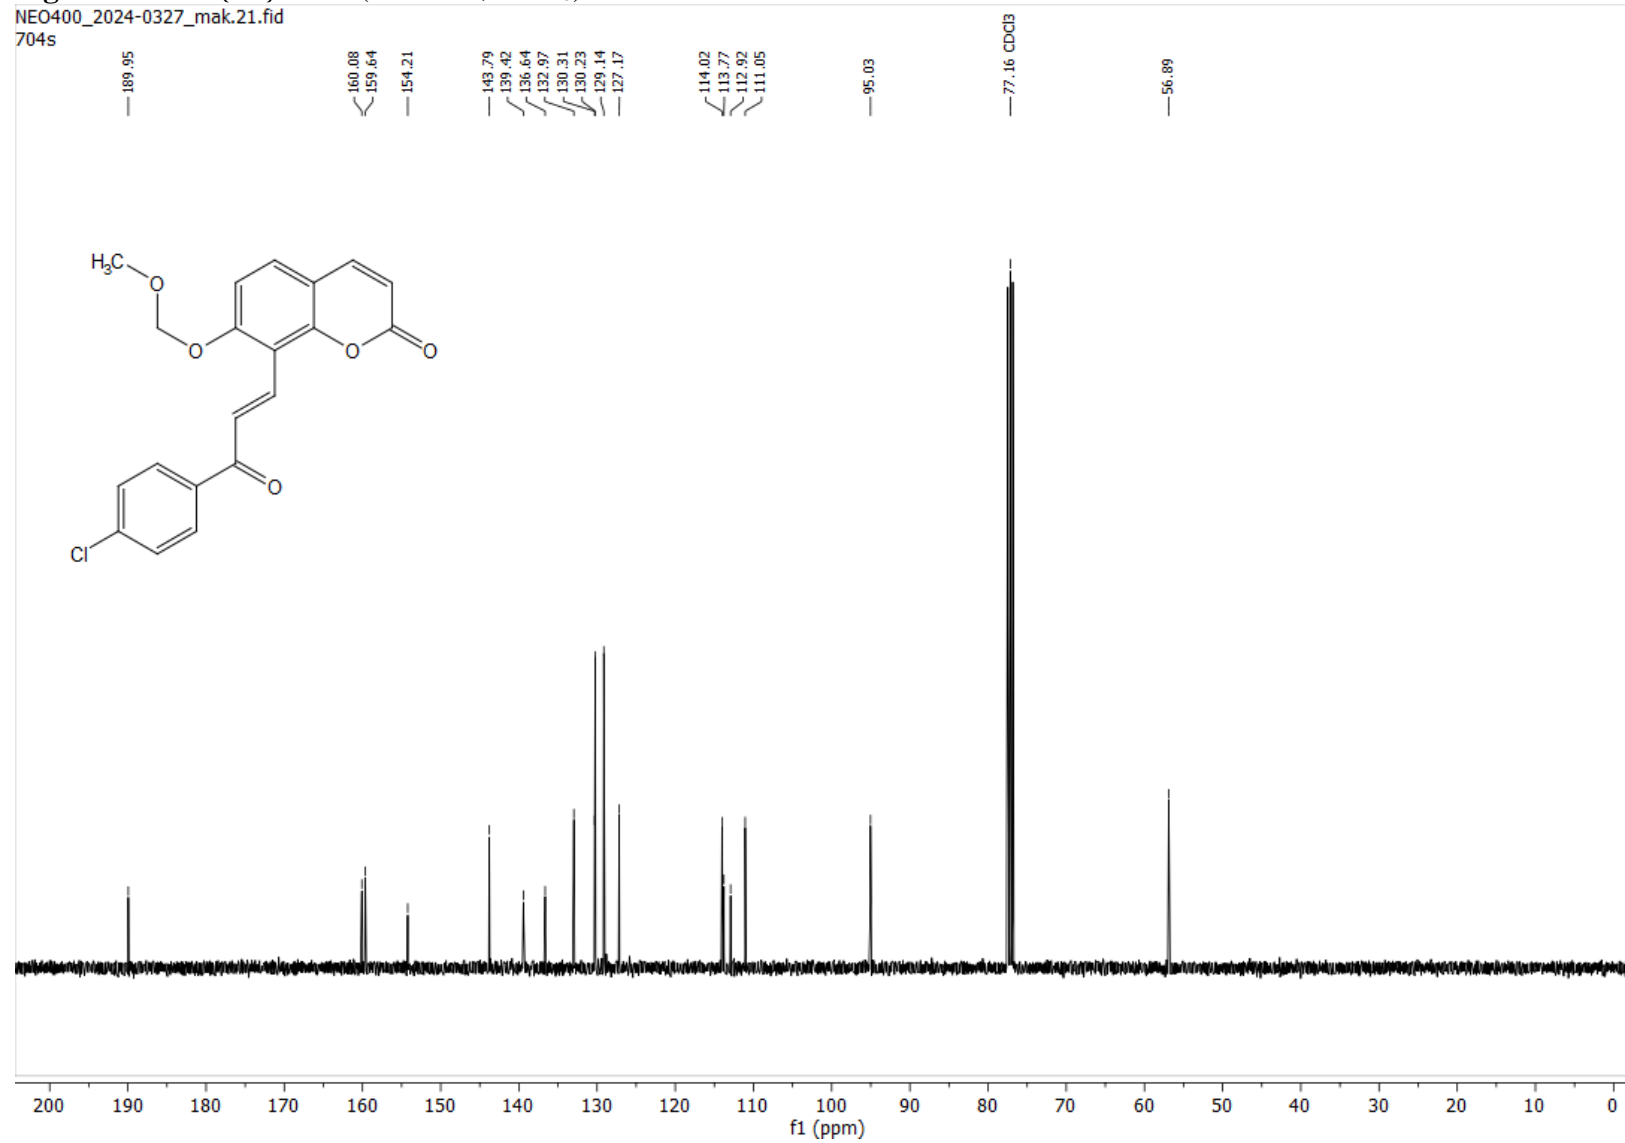

**Figure S92:**  $^1\text{H}$  NMR (400 MHz,  $\text{CDCl}_3$ ) of **13ad**

NEO400\_2024-0425\_mak.10.fid

708s

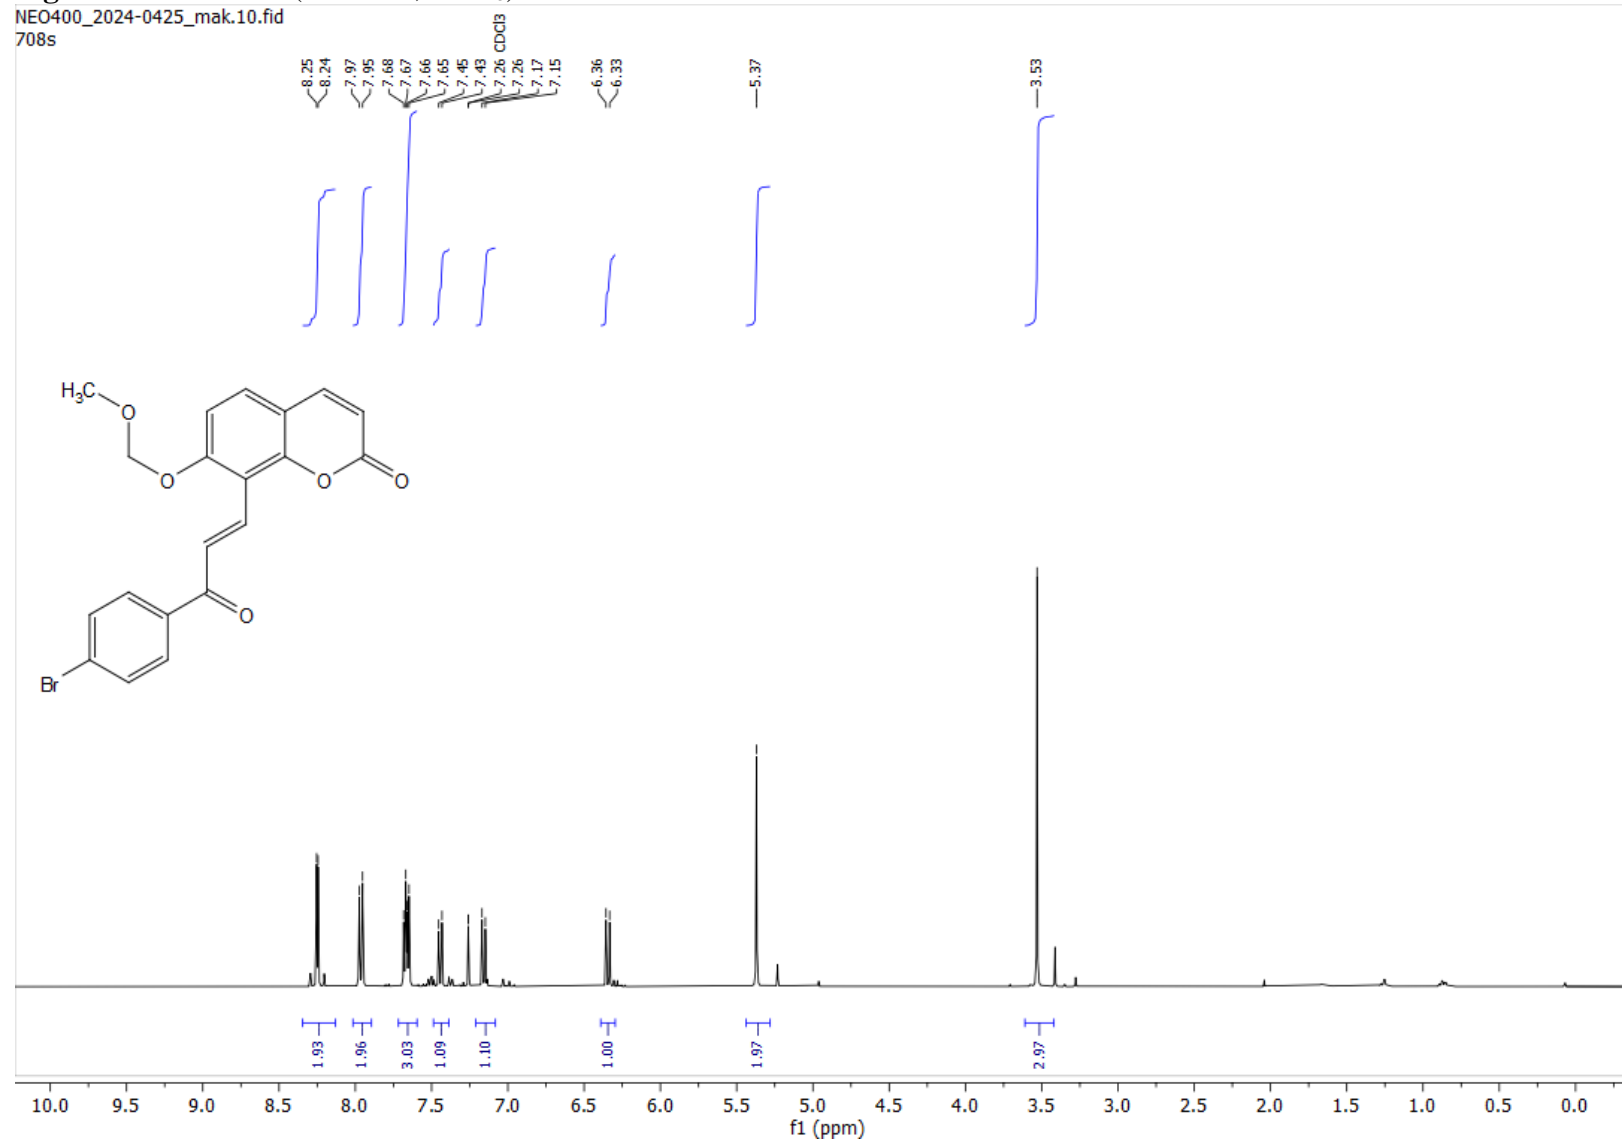

**Figure S93:**  $^{13}\text{C}\{^1\text{H}\}$  NMR (100 MHz,  $\text{CDCl}_3$ ) of **13ad**

NEO400\_2024-0425\_mak.11.fid

708s

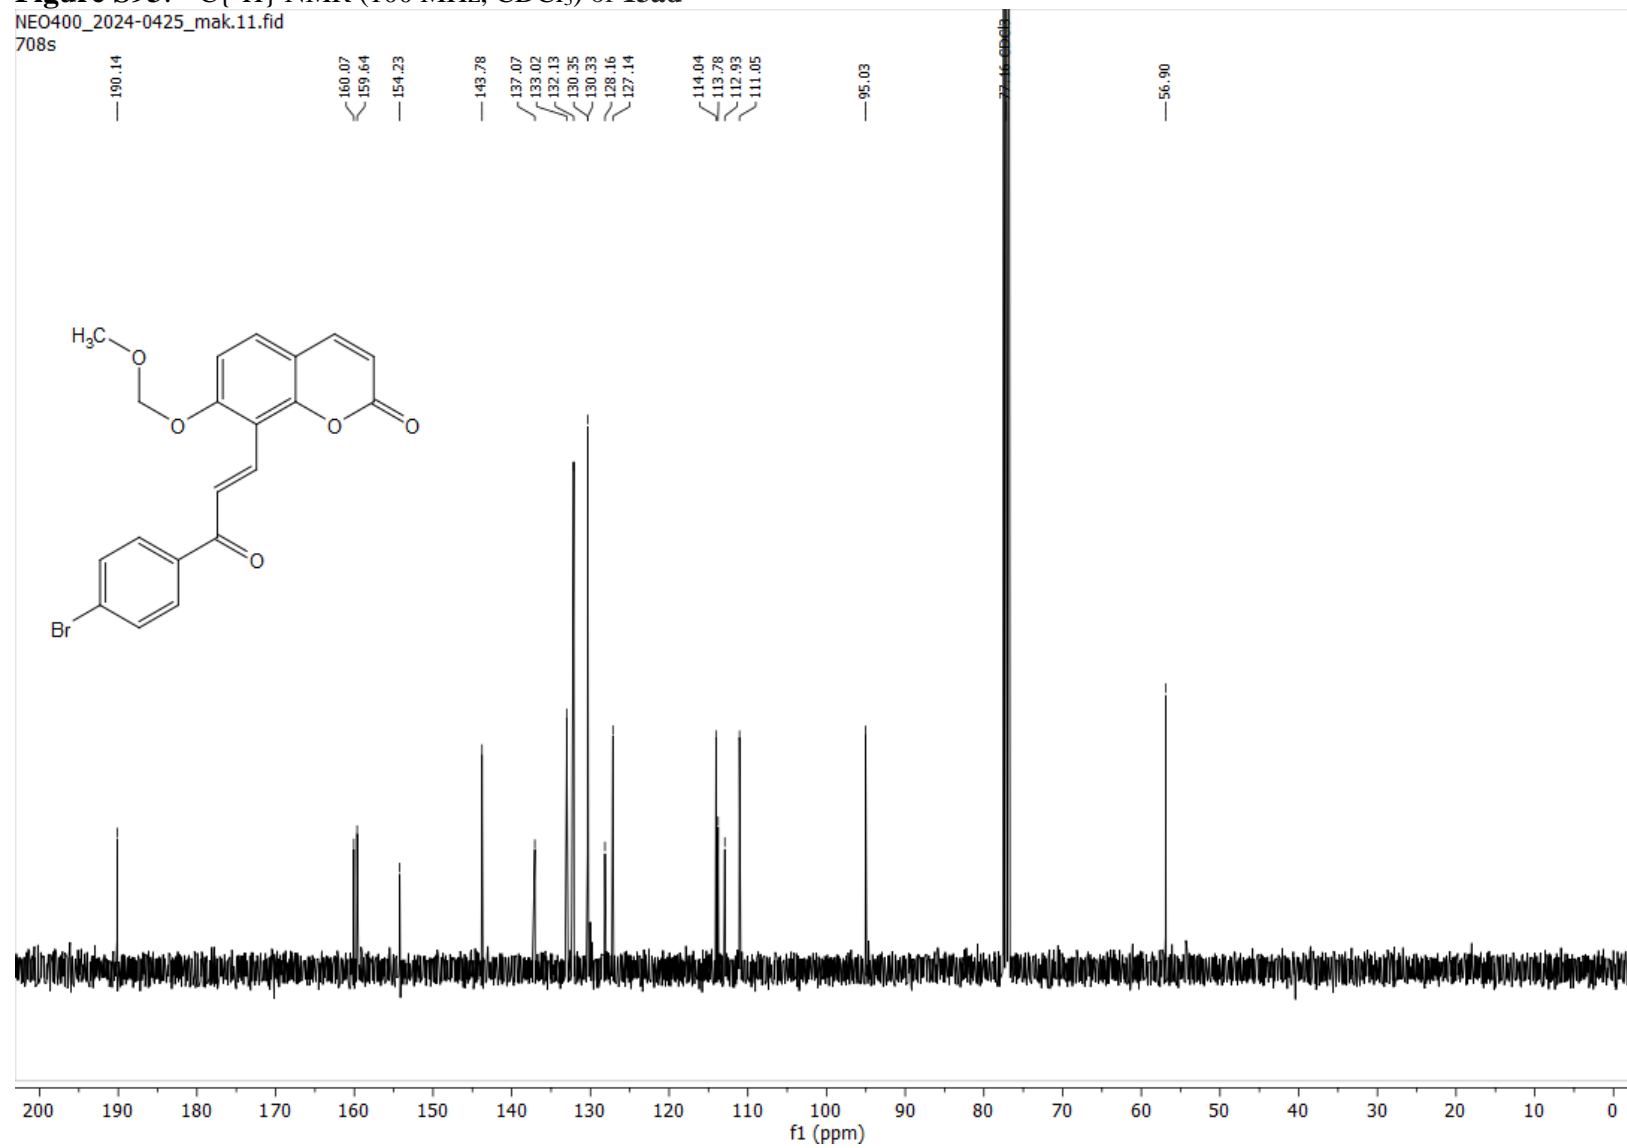



**Figure S94:**  $^1\text{H}$  NMR (400 MHz,  $\text{CDCl}_3$ ) of **13ae**

NEO400\_2024-0906\_mak.10.fid  
707sf2

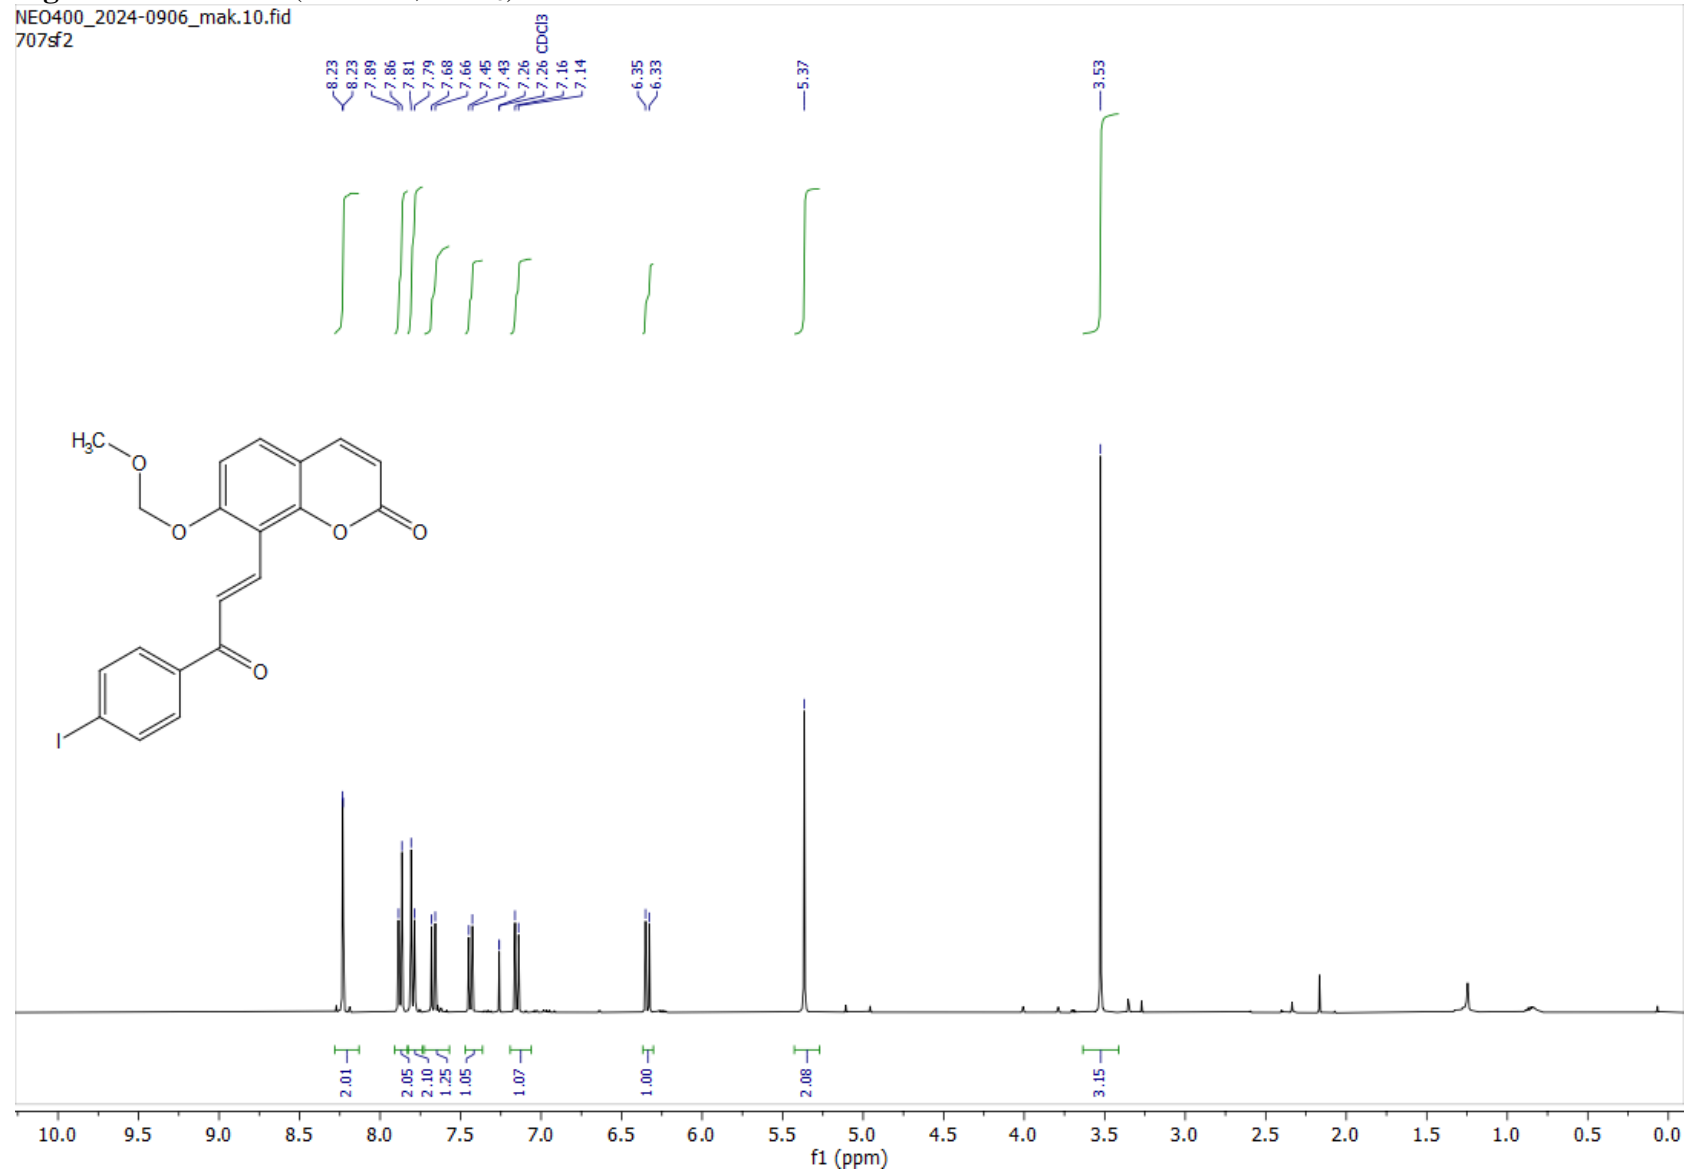

**Figure S95:**  $^{13}\text{C}\{^1\text{H}\}$  NMR (100 MHz,  $\text{CDCl}_3$ ) of **13ae**

NEO400\_2024-0906\_mak.11.fid  
707sf2

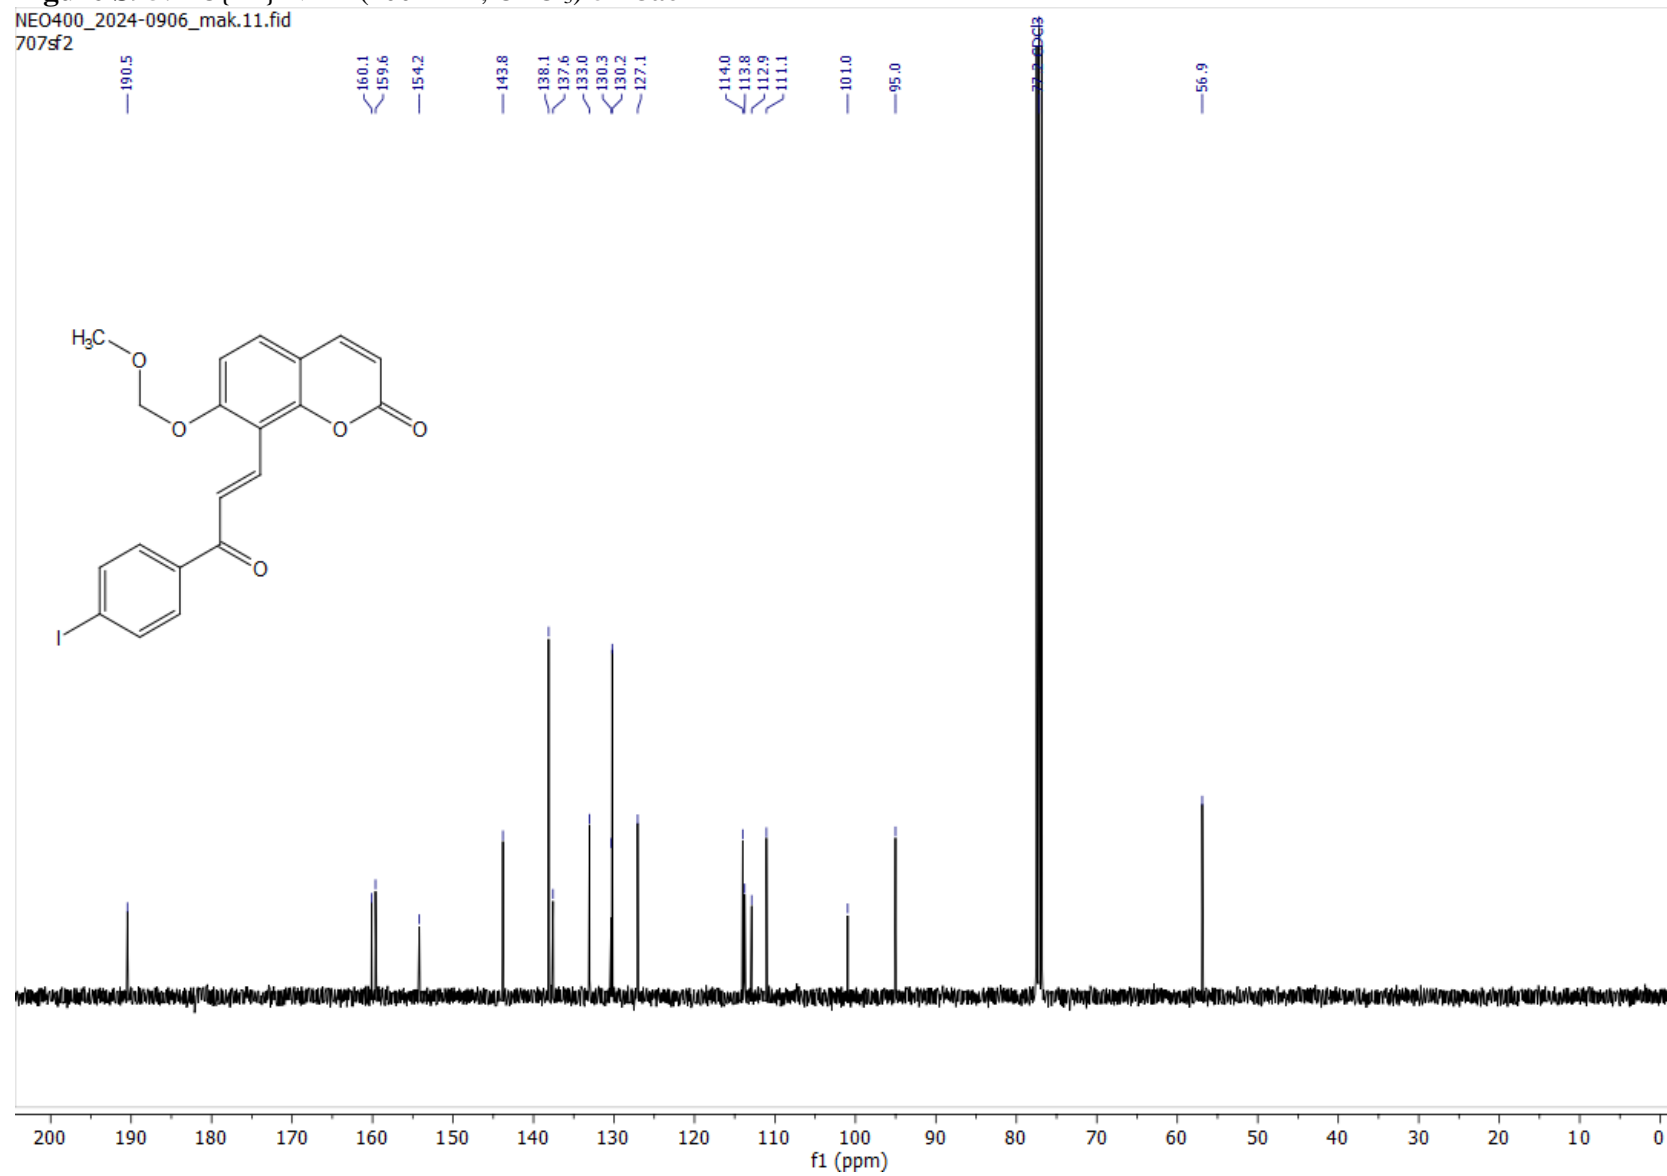

Figure S96: COSY (400 MHz, CDCl<sub>3</sub>) of 13ae

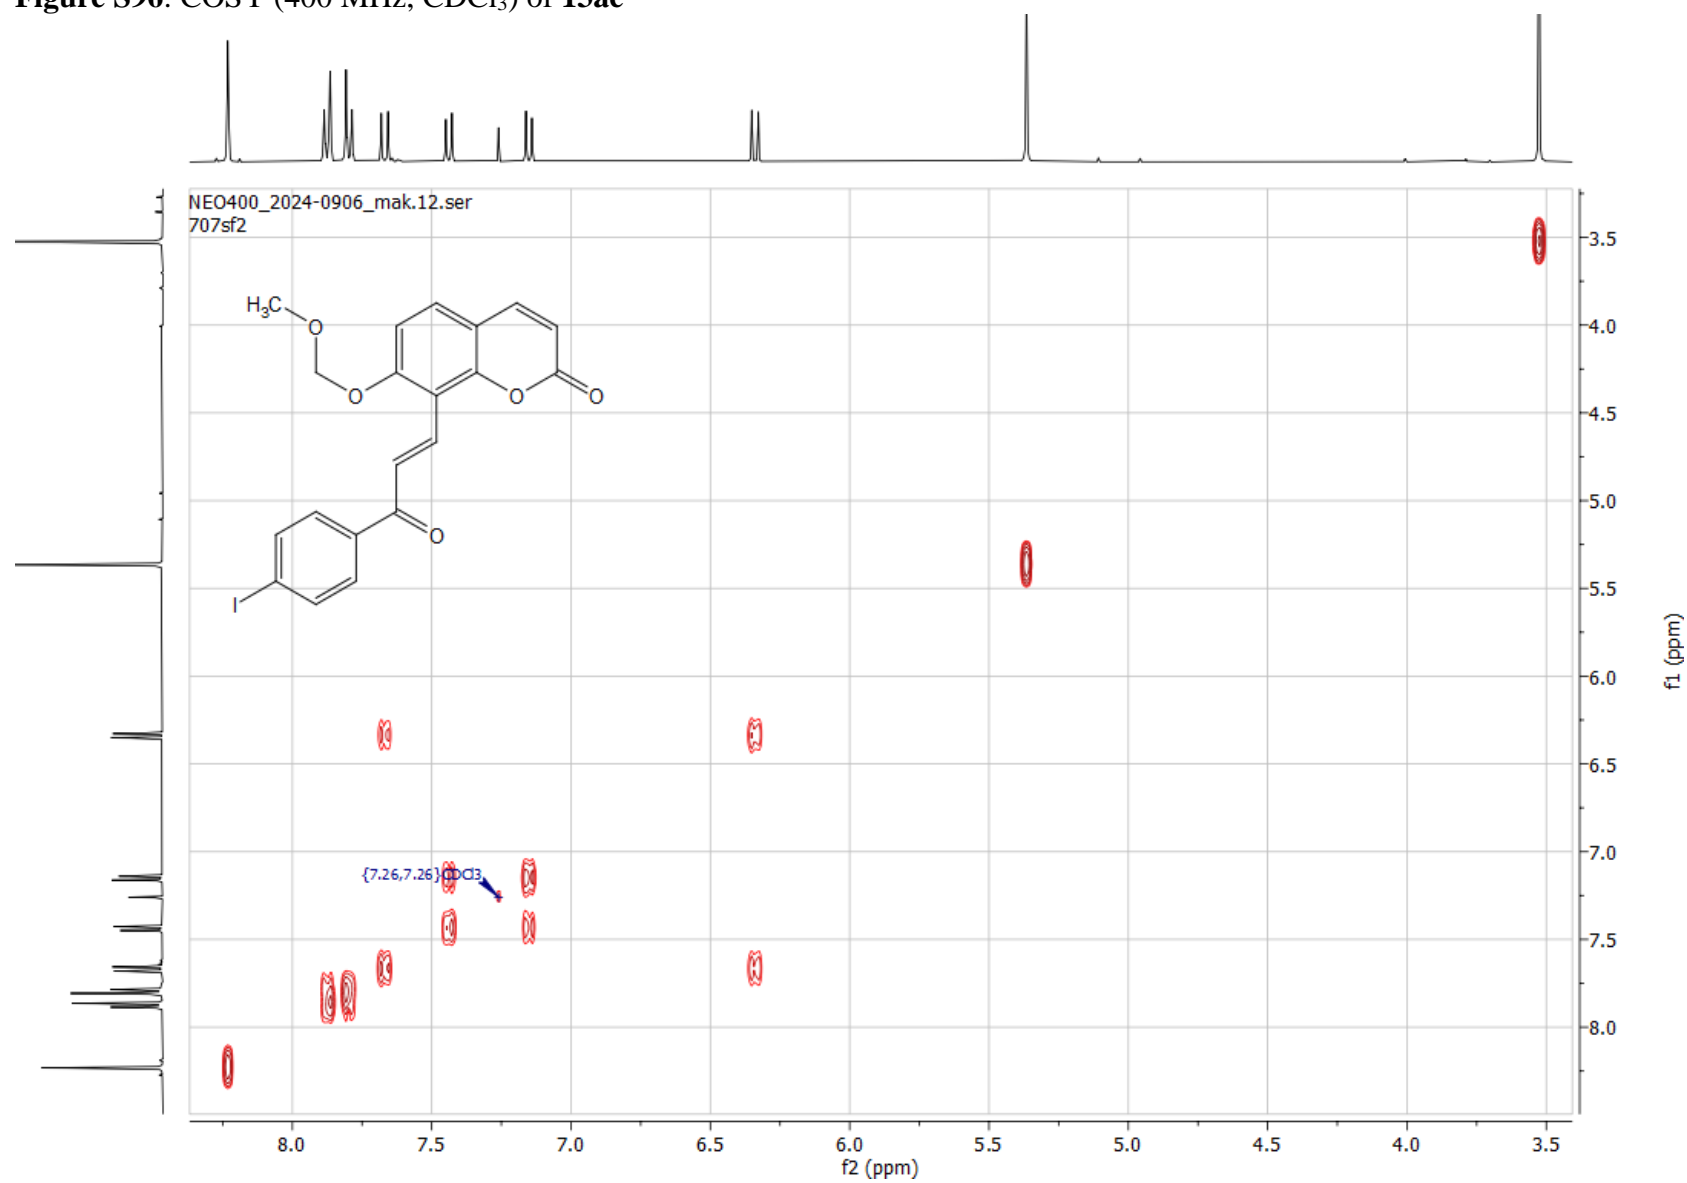

Figure S97: HSQC (400/100 MHz, CDCl<sub>3</sub>) of **13ae**

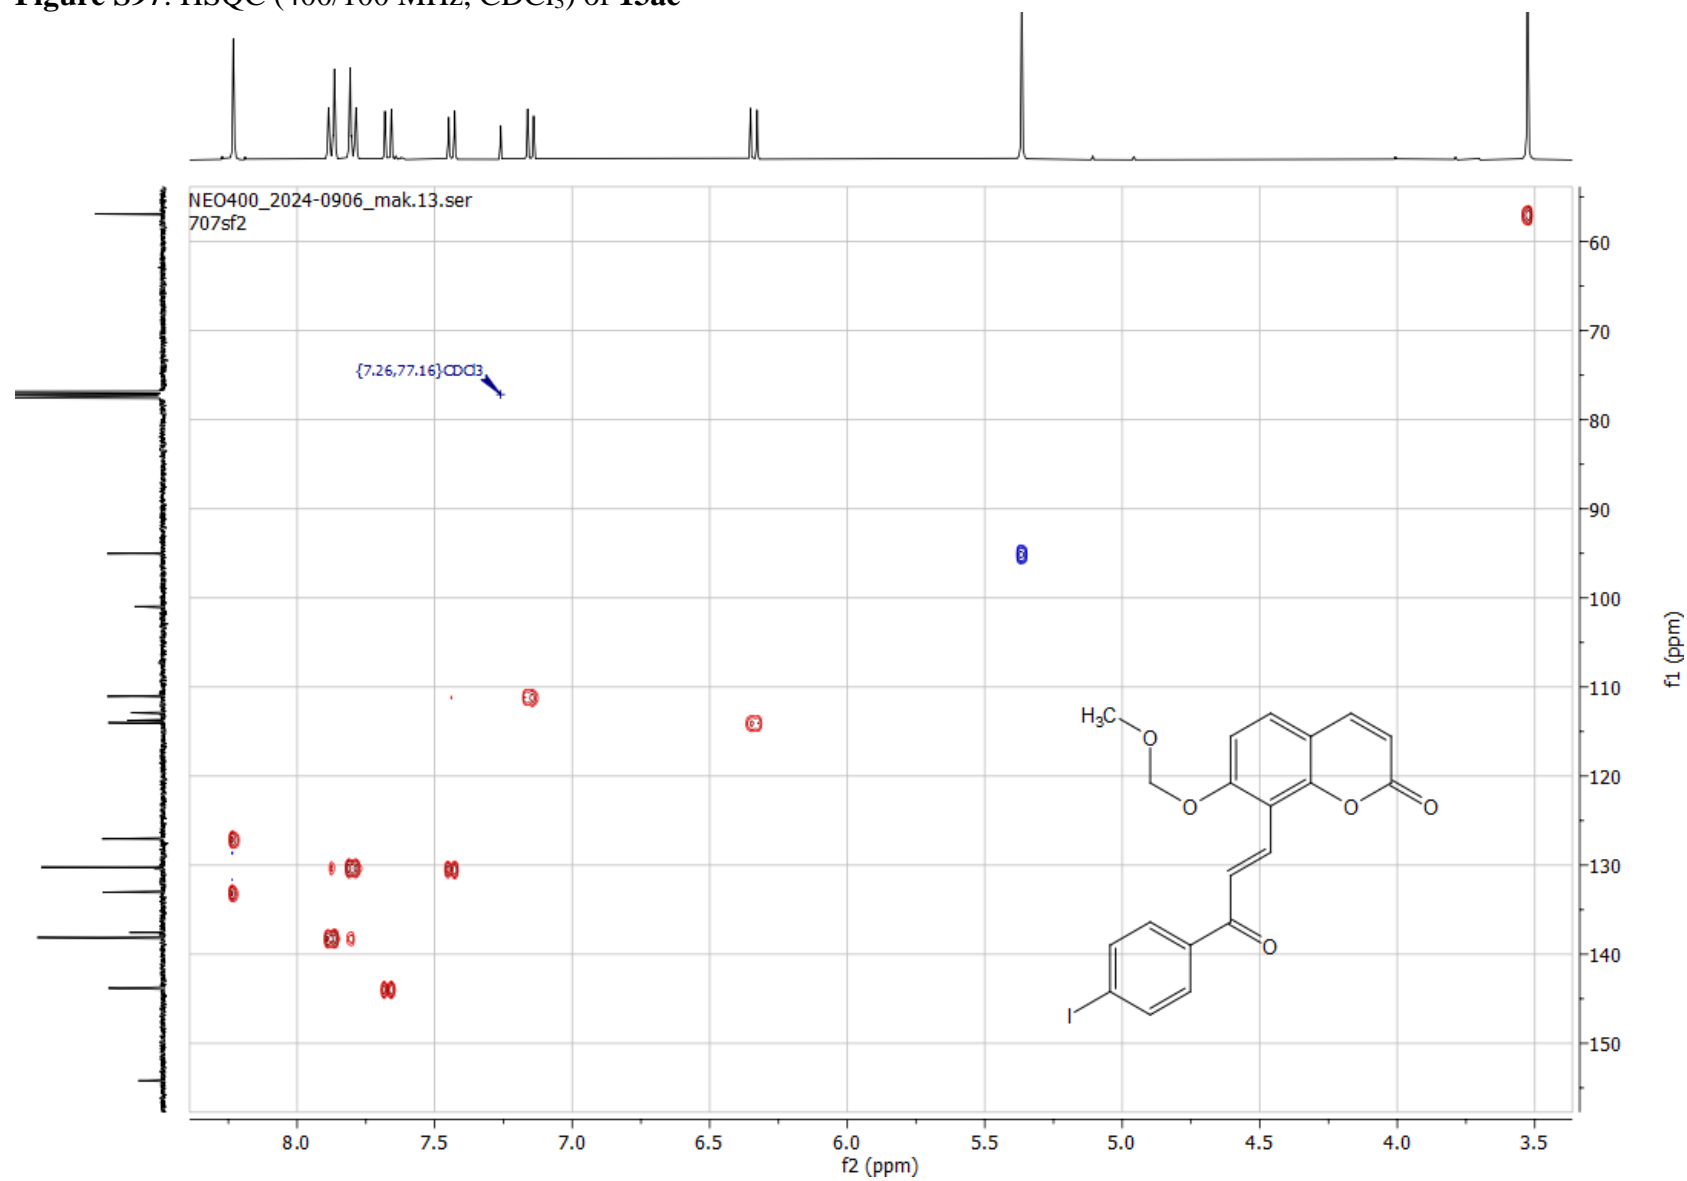

Figure S98: HMBC (400/100 MHz, CDCl<sub>3</sub>) of 13ae

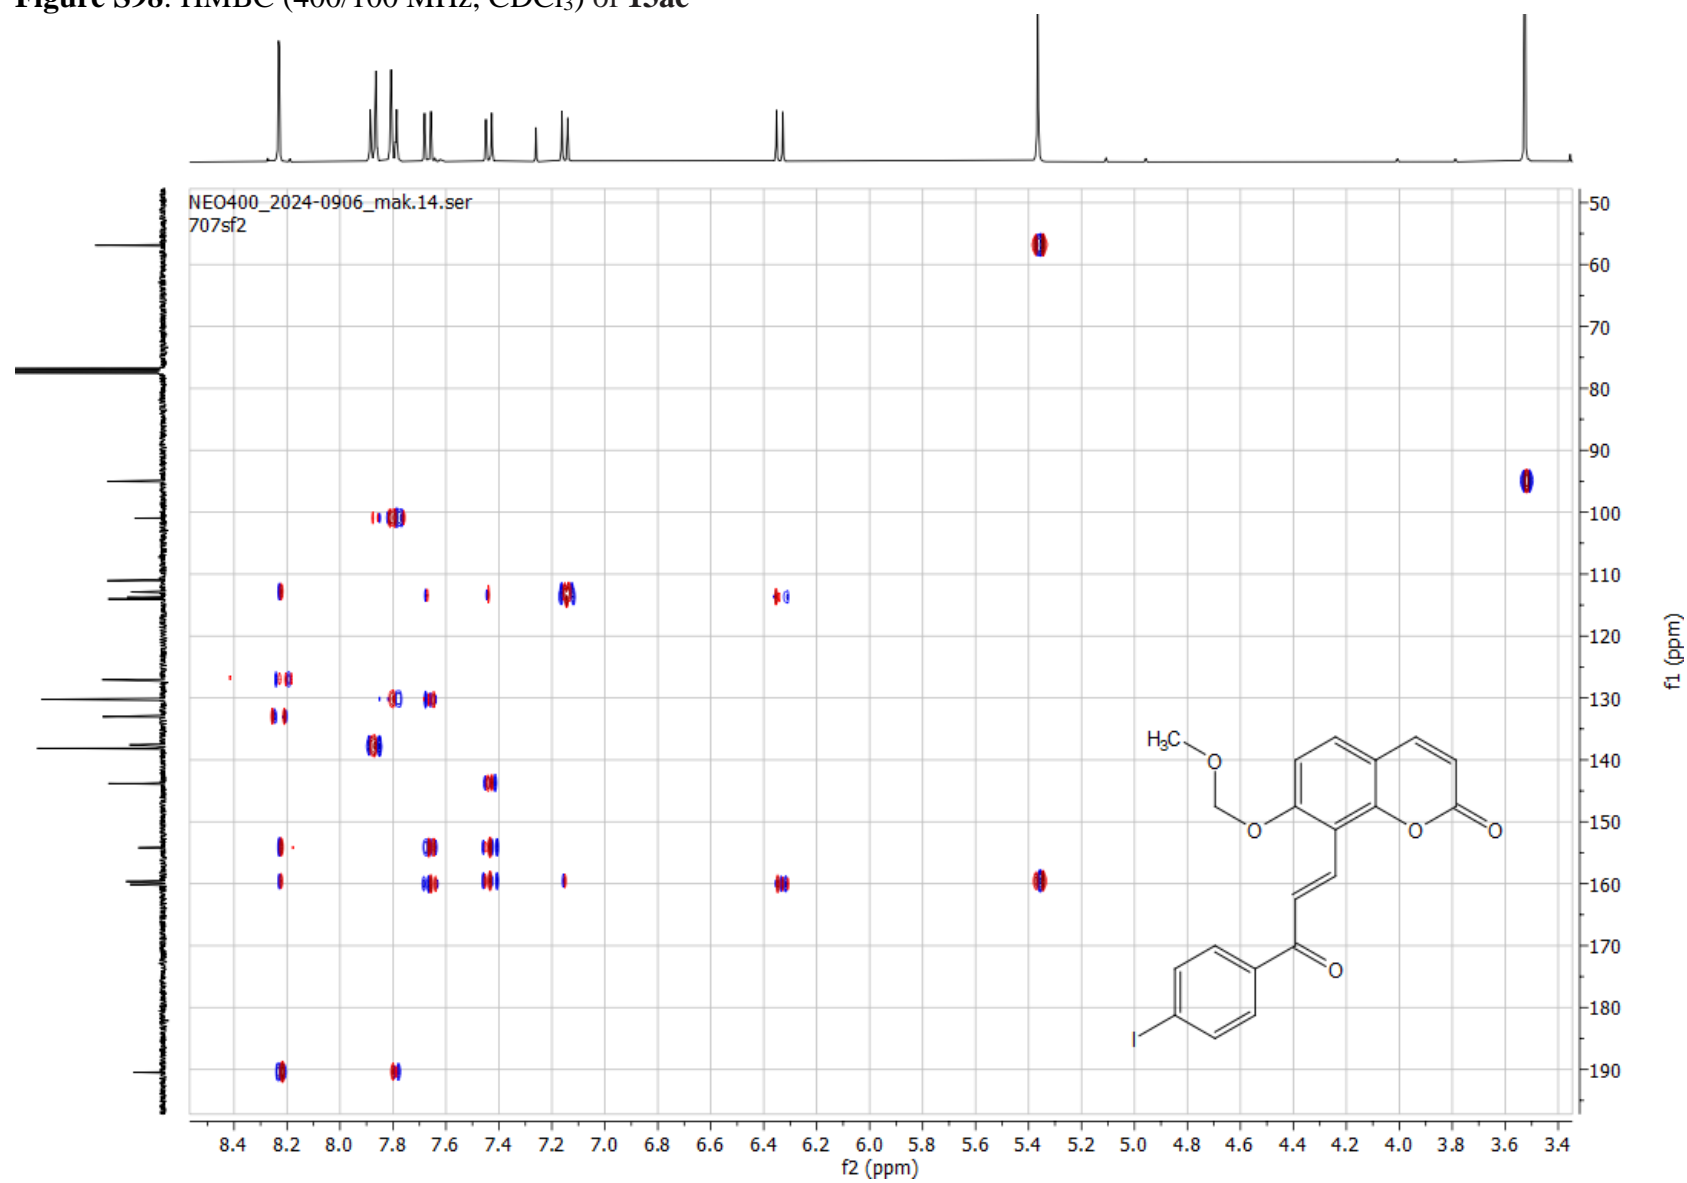

Figure S99: NOESY (400 MHz, CDCl<sub>3</sub>) of 13ae

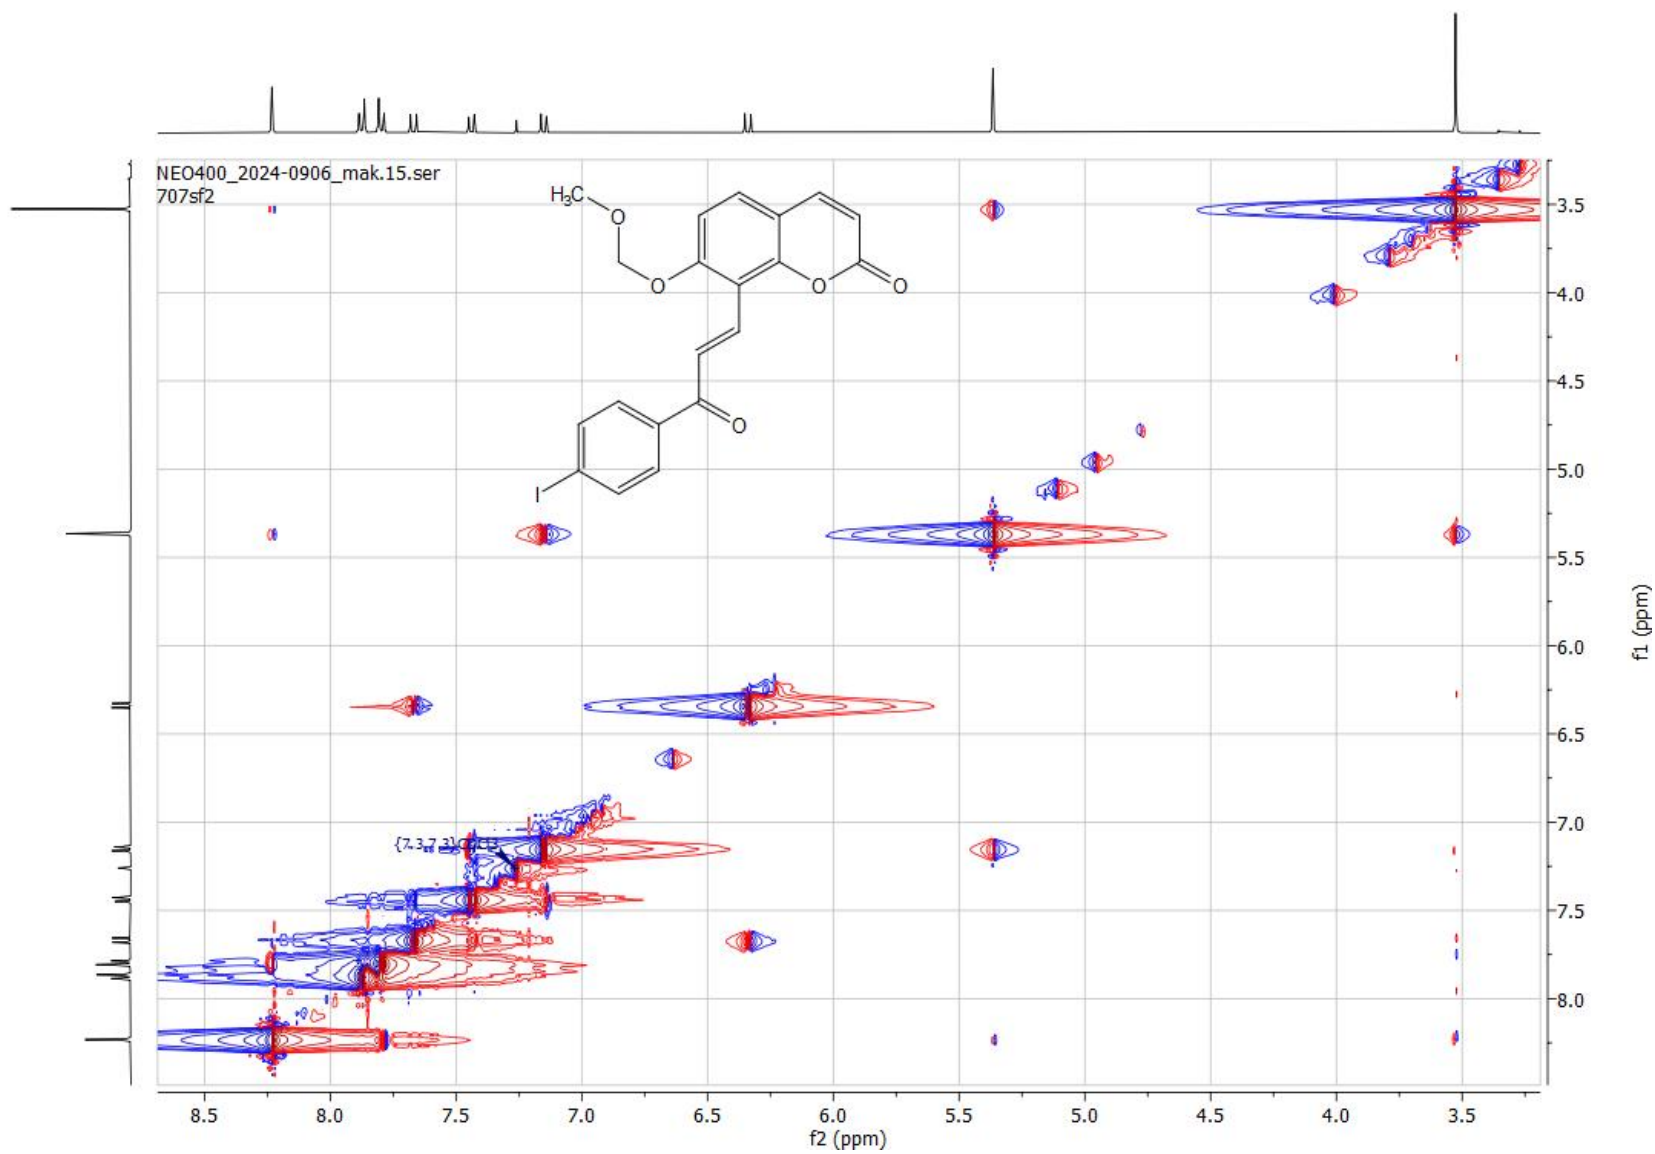

**Figure S100:**  $^1\text{H}$  NMR (400 MHz,  $\text{CDCl}_3$ ) of **14ae**

NEO400\_2024-0909\_mak.10.fid

707sf1

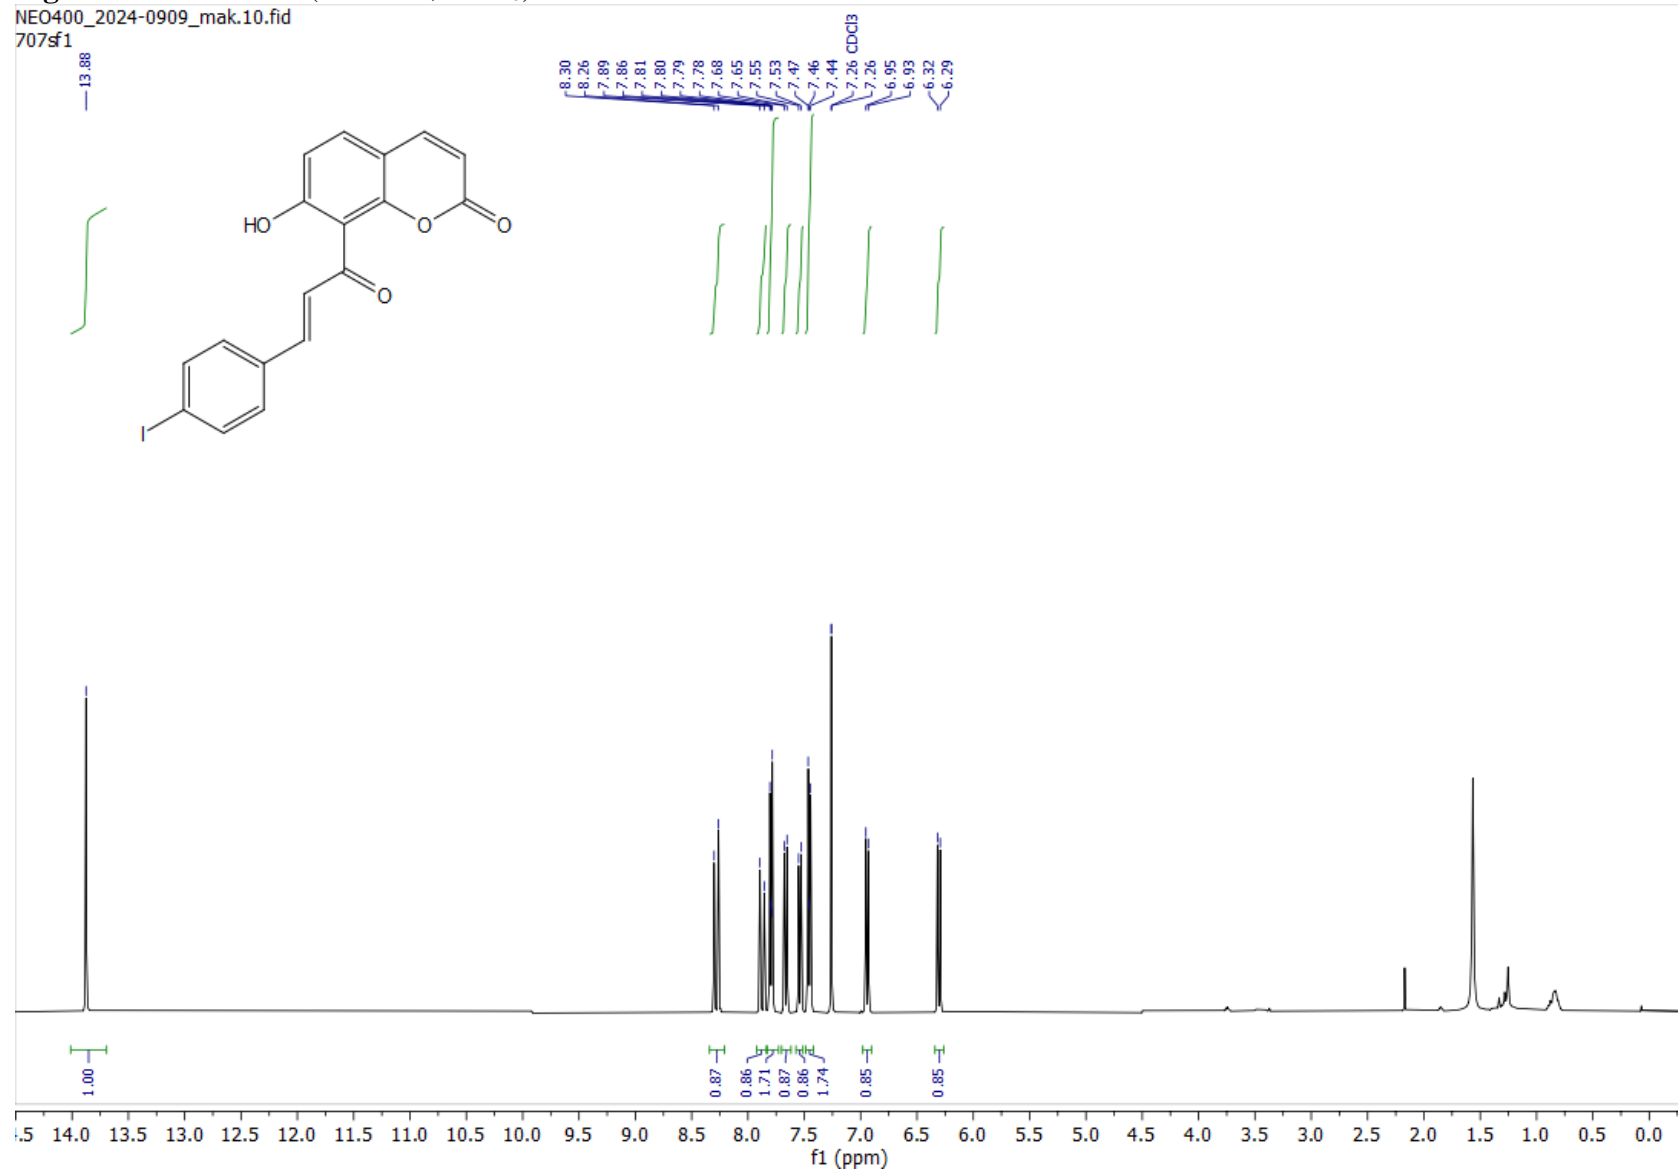

**Figure S101:**  $^{13}\text{C}\{^1\text{H}\}$  NMR (100 MHz,  $\text{CDCl}_3$ ) of **14ae**

NEO400\_2024-0909\_mak.11.fid  
707sf1

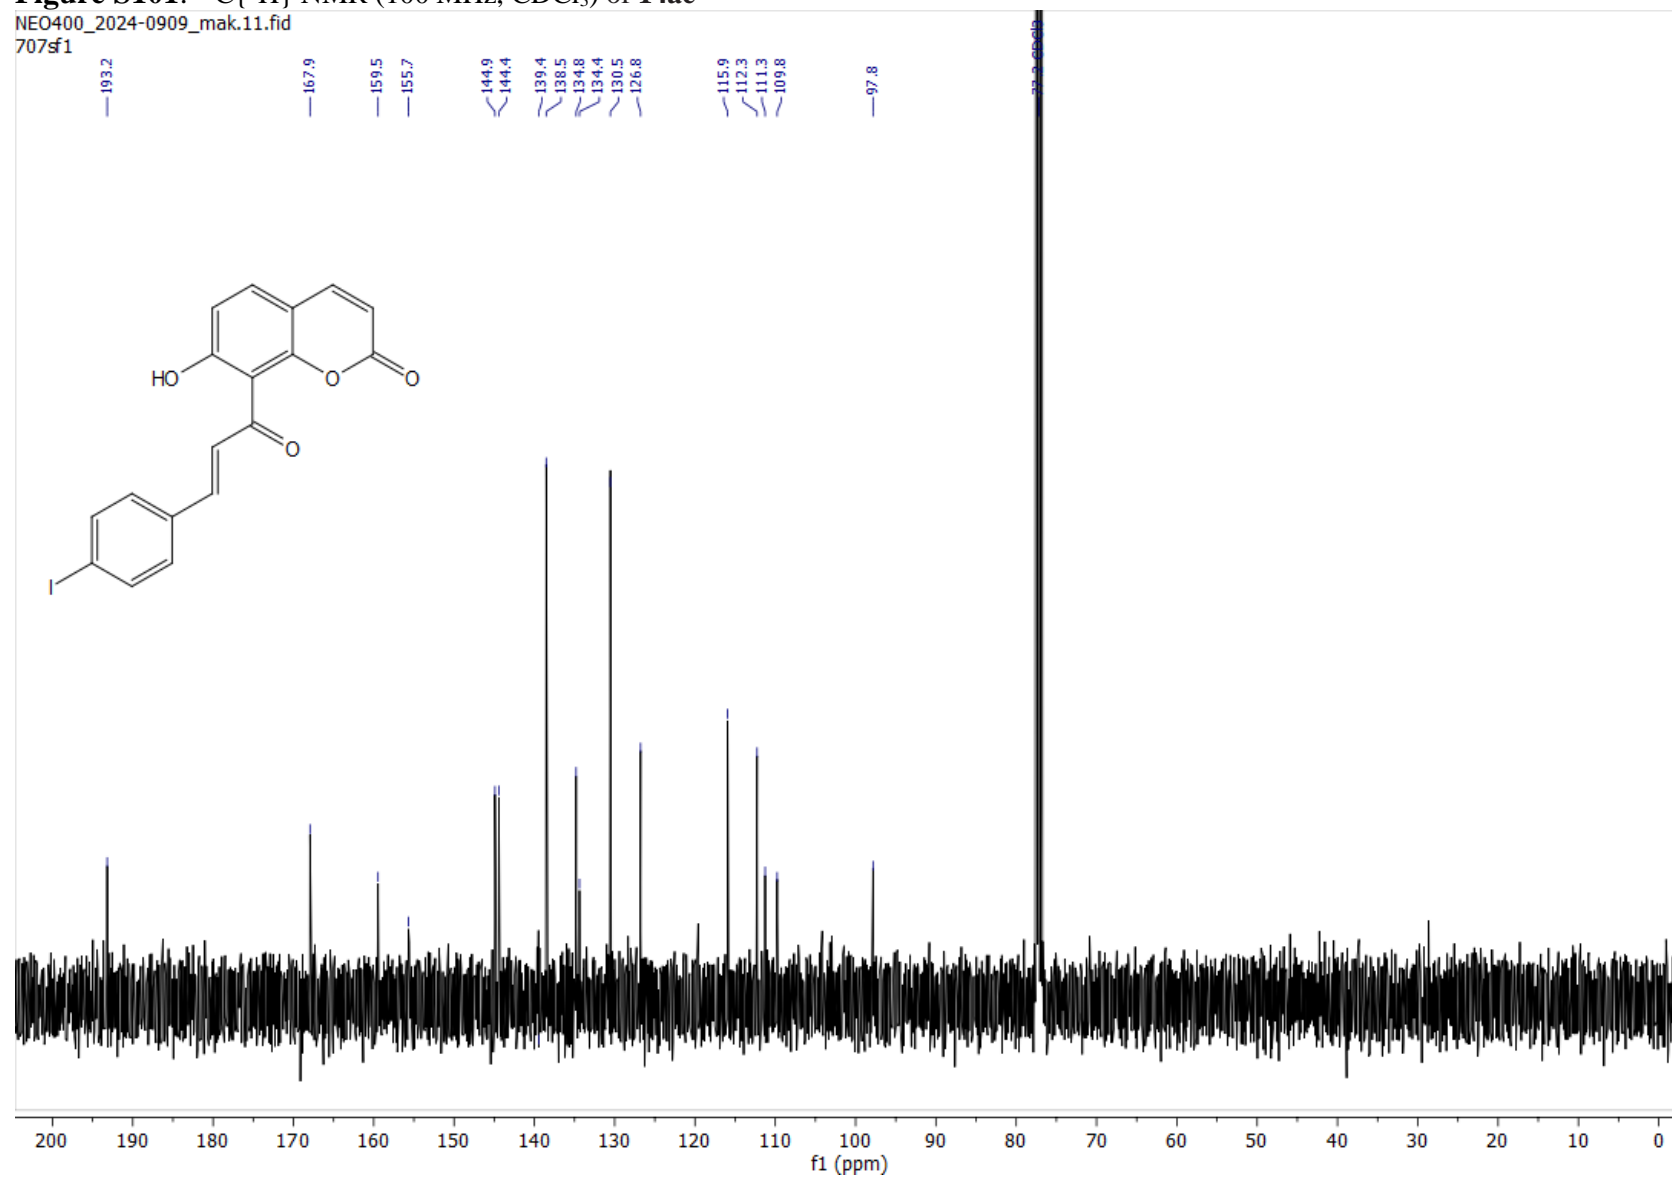



Figure S102: COSY (400 MHz, CDCl<sub>3</sub>) of **14ae**

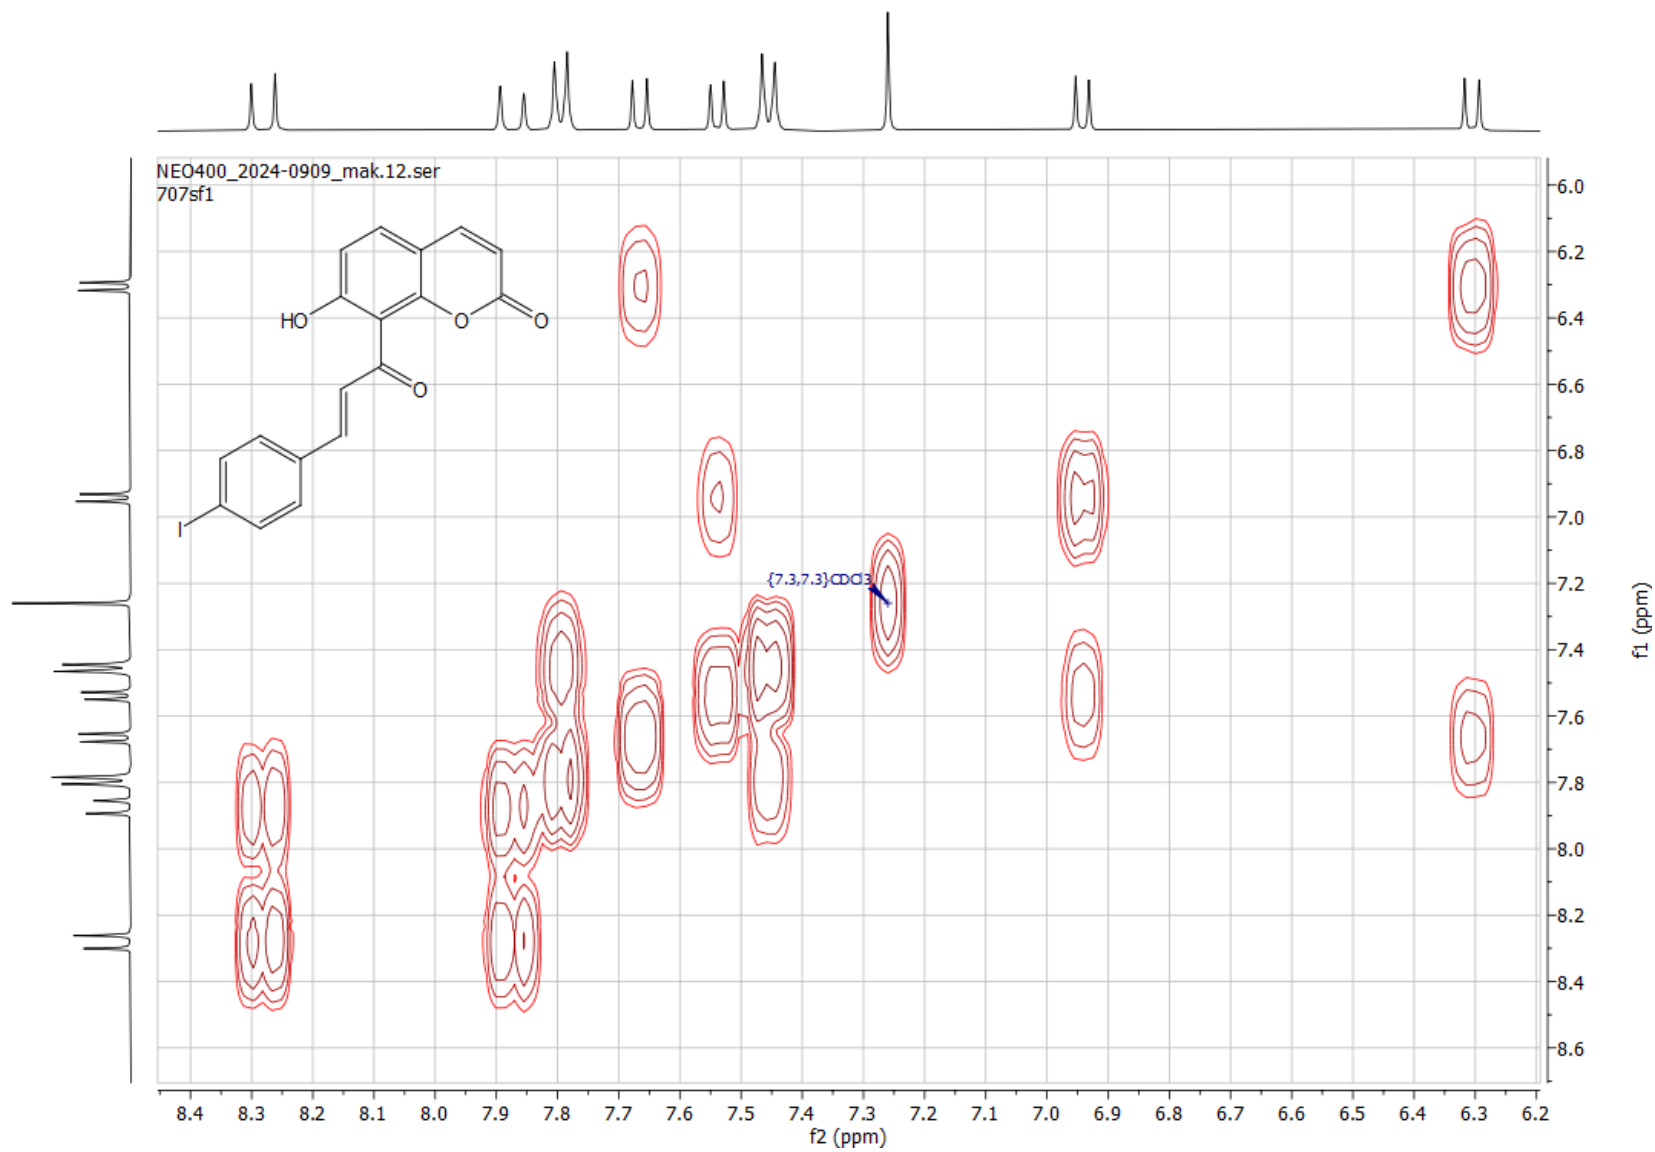

Figure S103: HSQC (400/100 MHz, CDCl<sub>3</sub>) of **14ae**

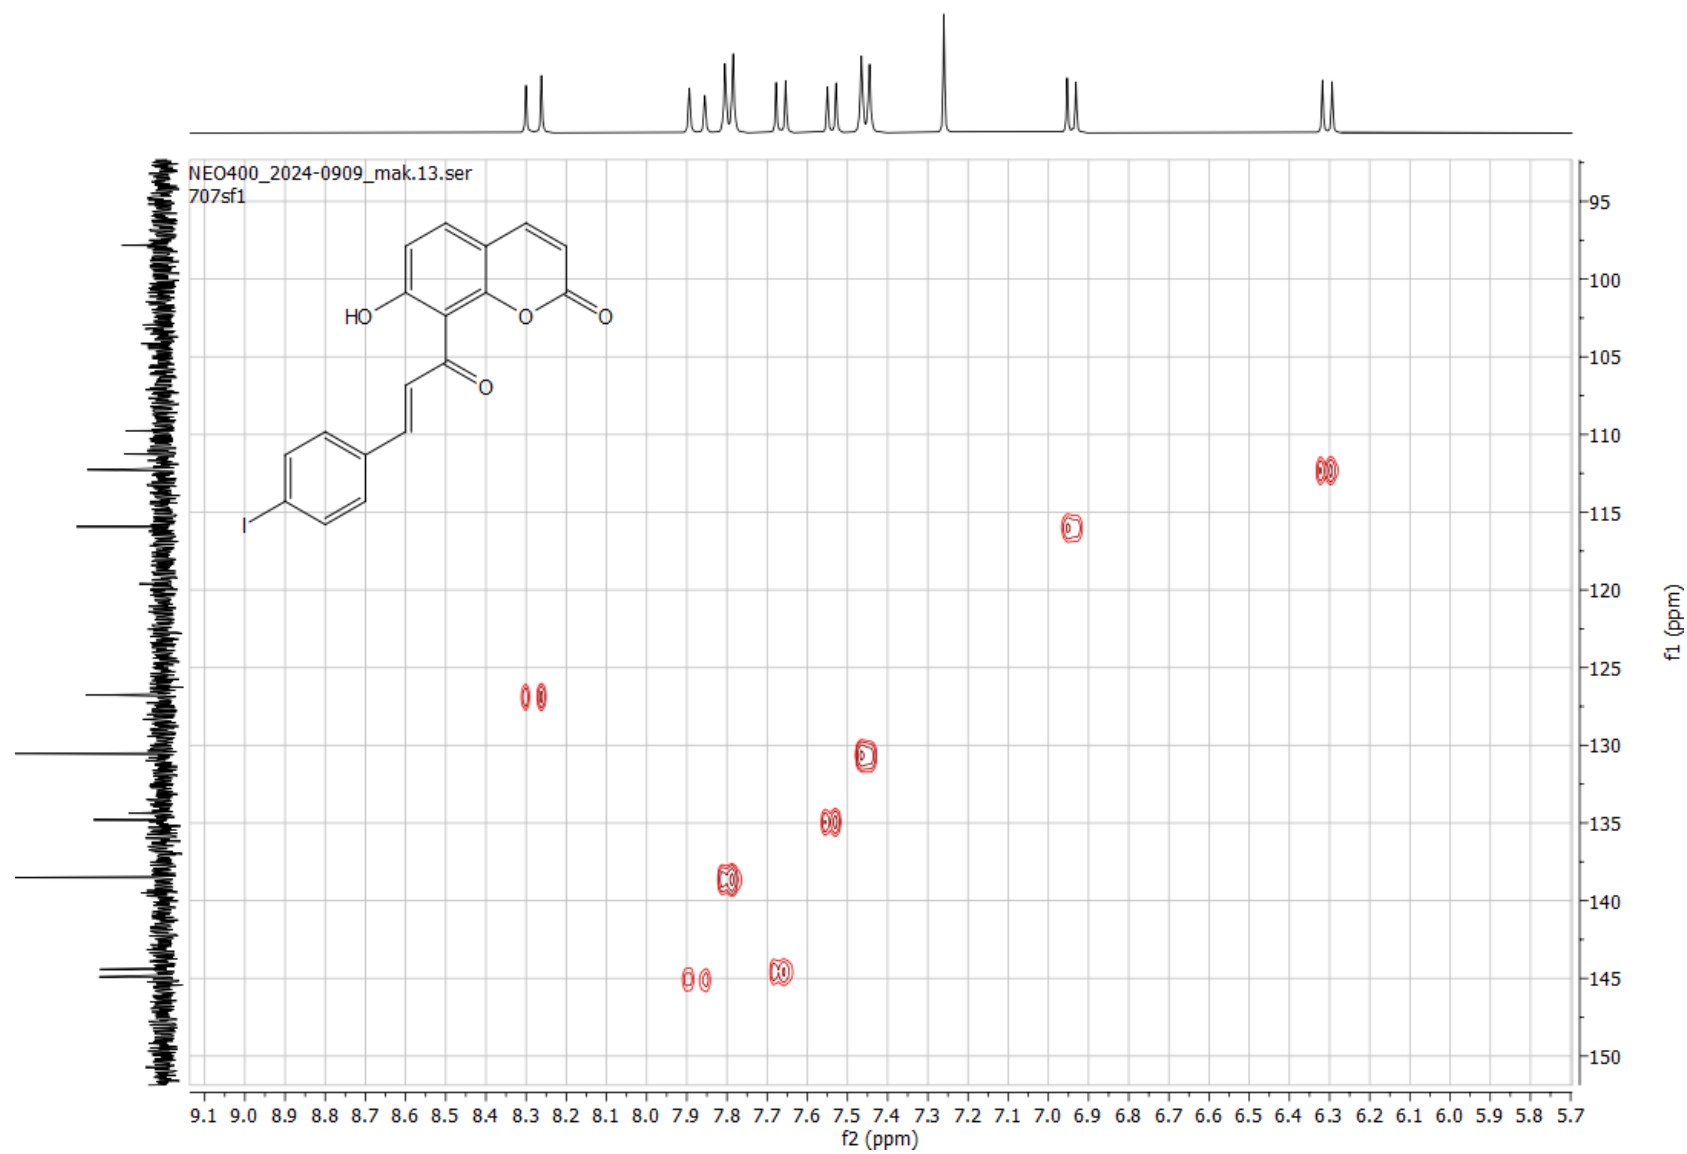

Figure S104: HMBC (400/100 MHz, CDCl<sub>3</sub>) of 14ae

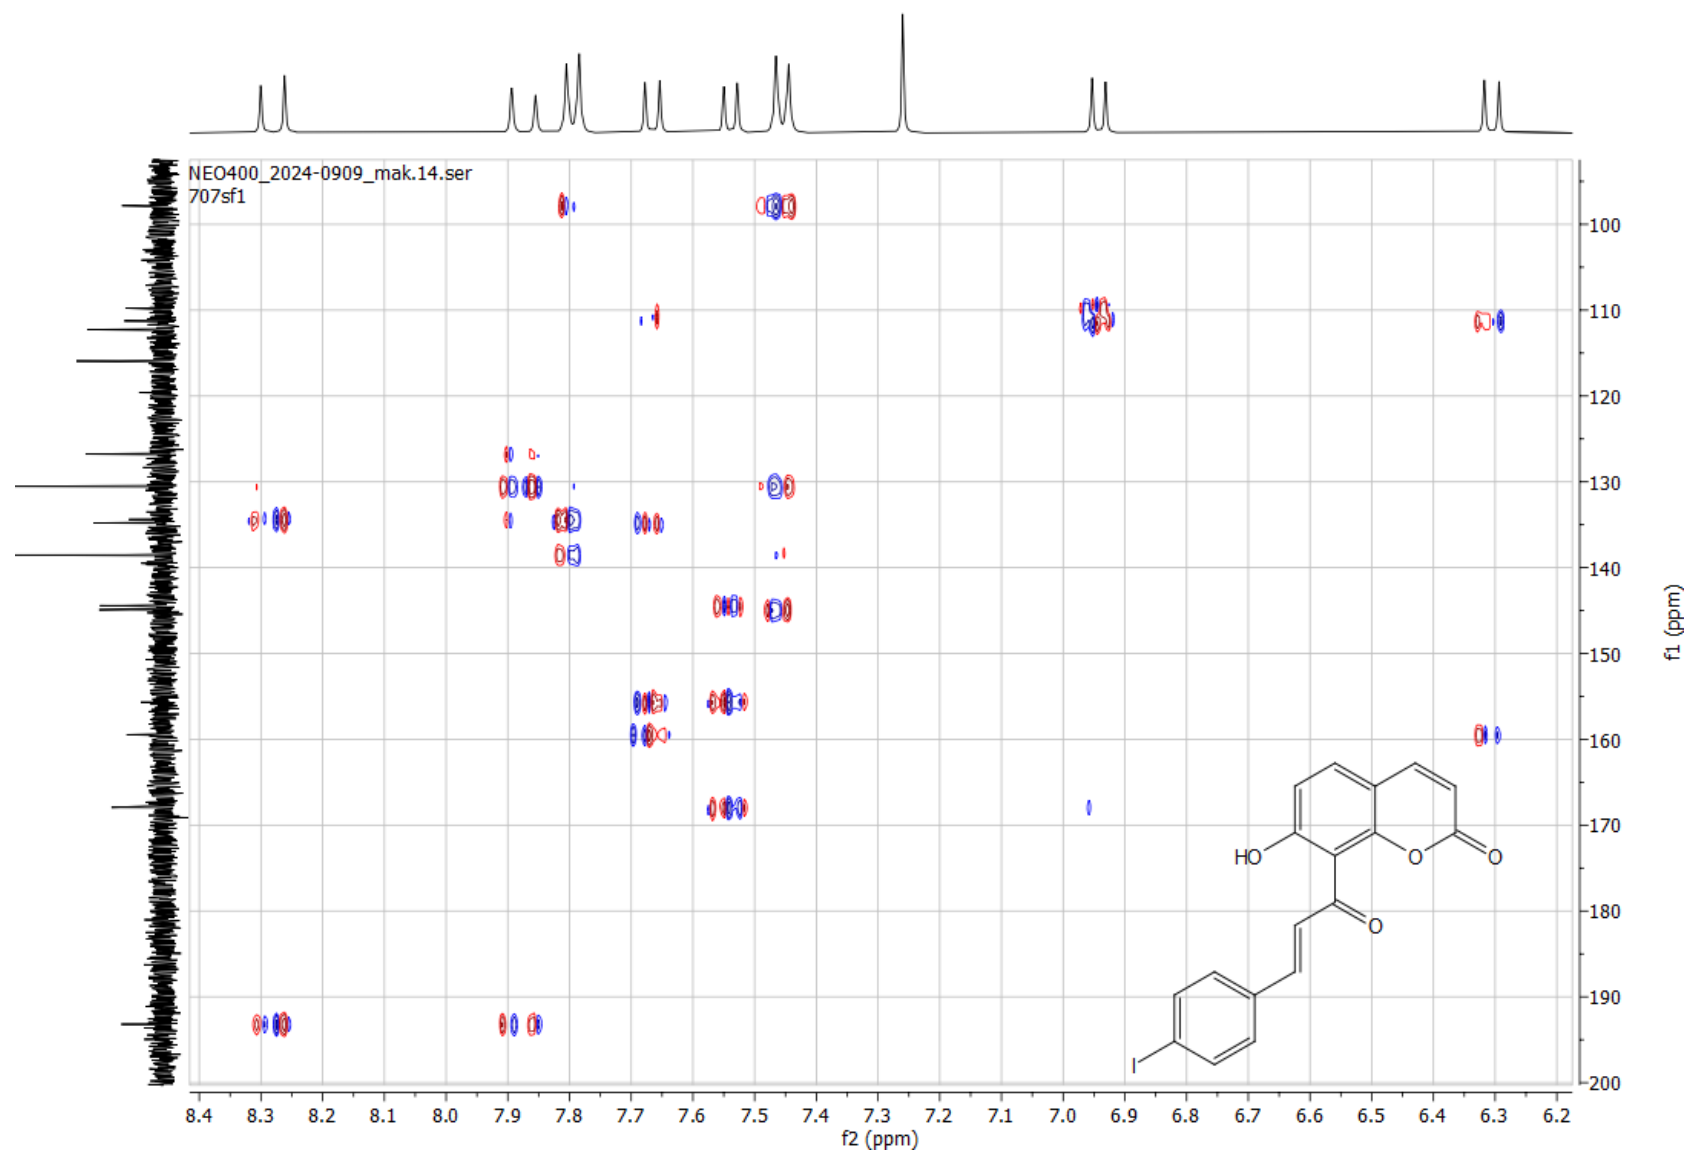

**Figure S105:** NOESY (400 MHz, CDCl<sub>3</sub>) of **14ae**

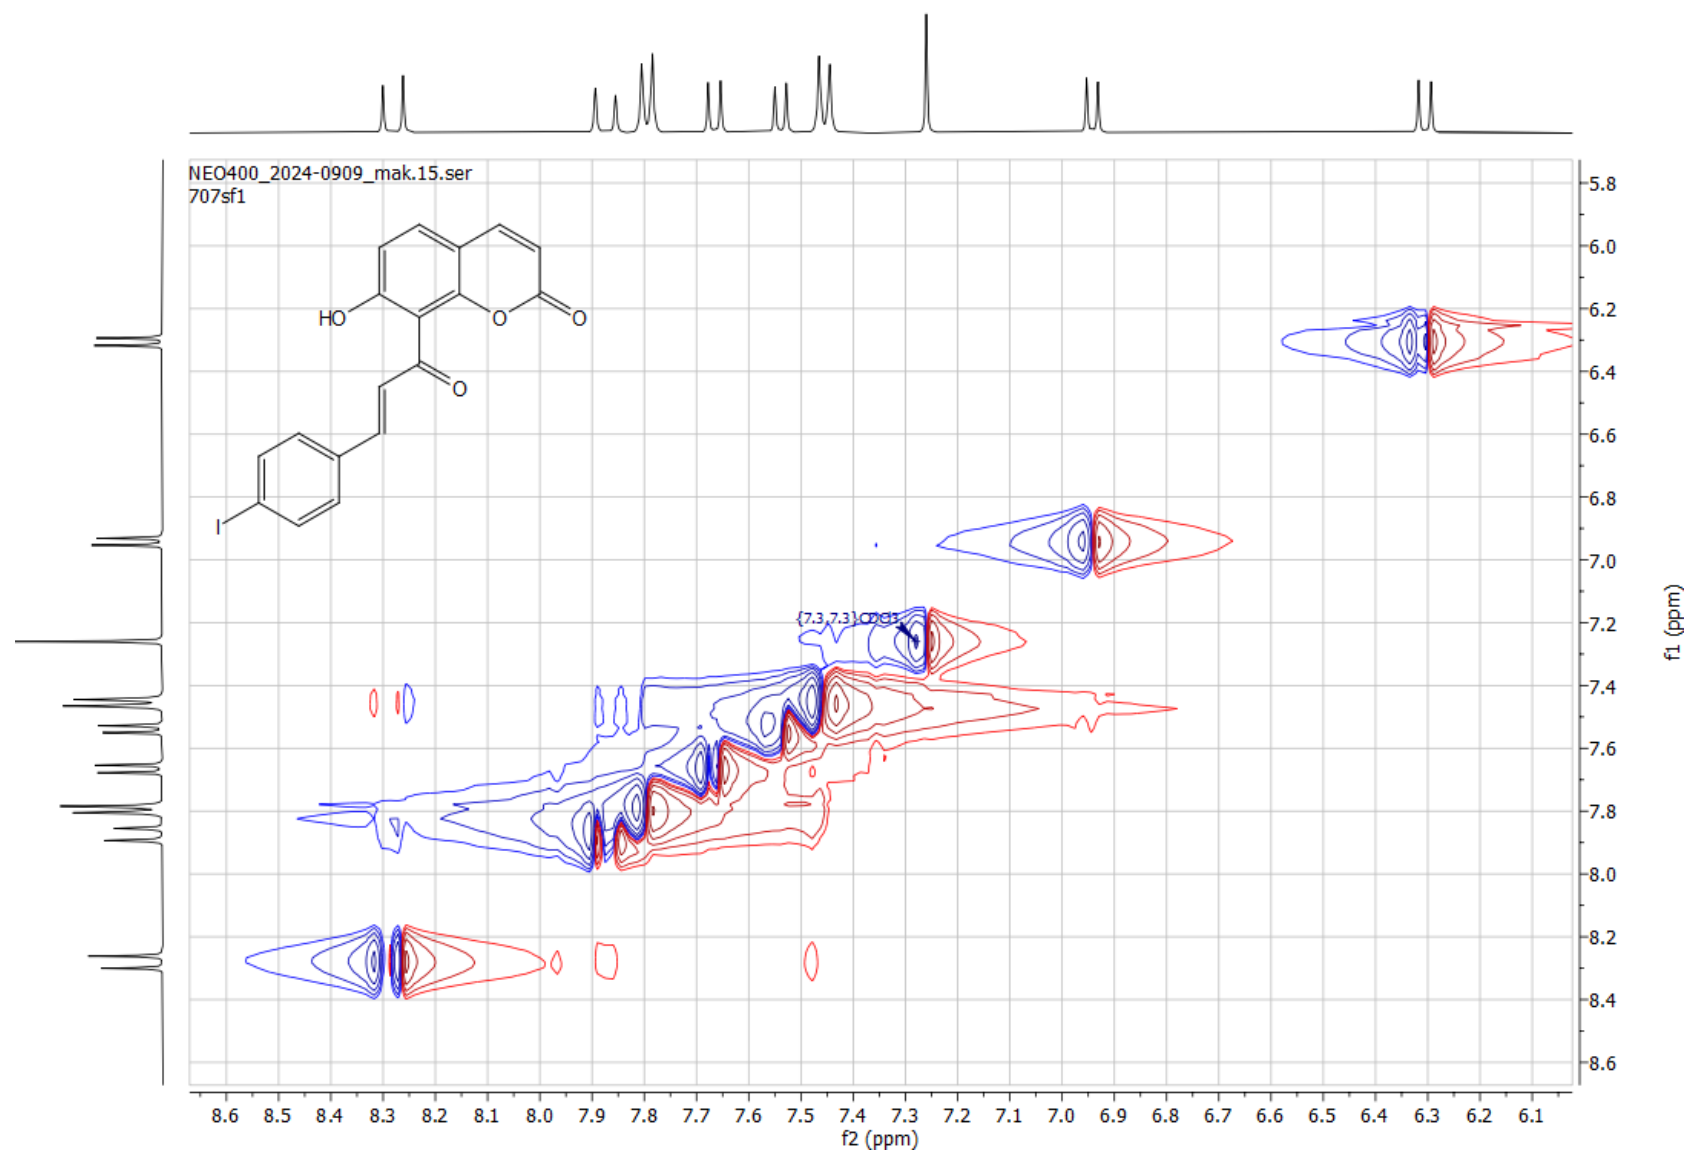

**Figure S106:** NMR-Signal assignment and selected HMBC-couplings for compound **13af**

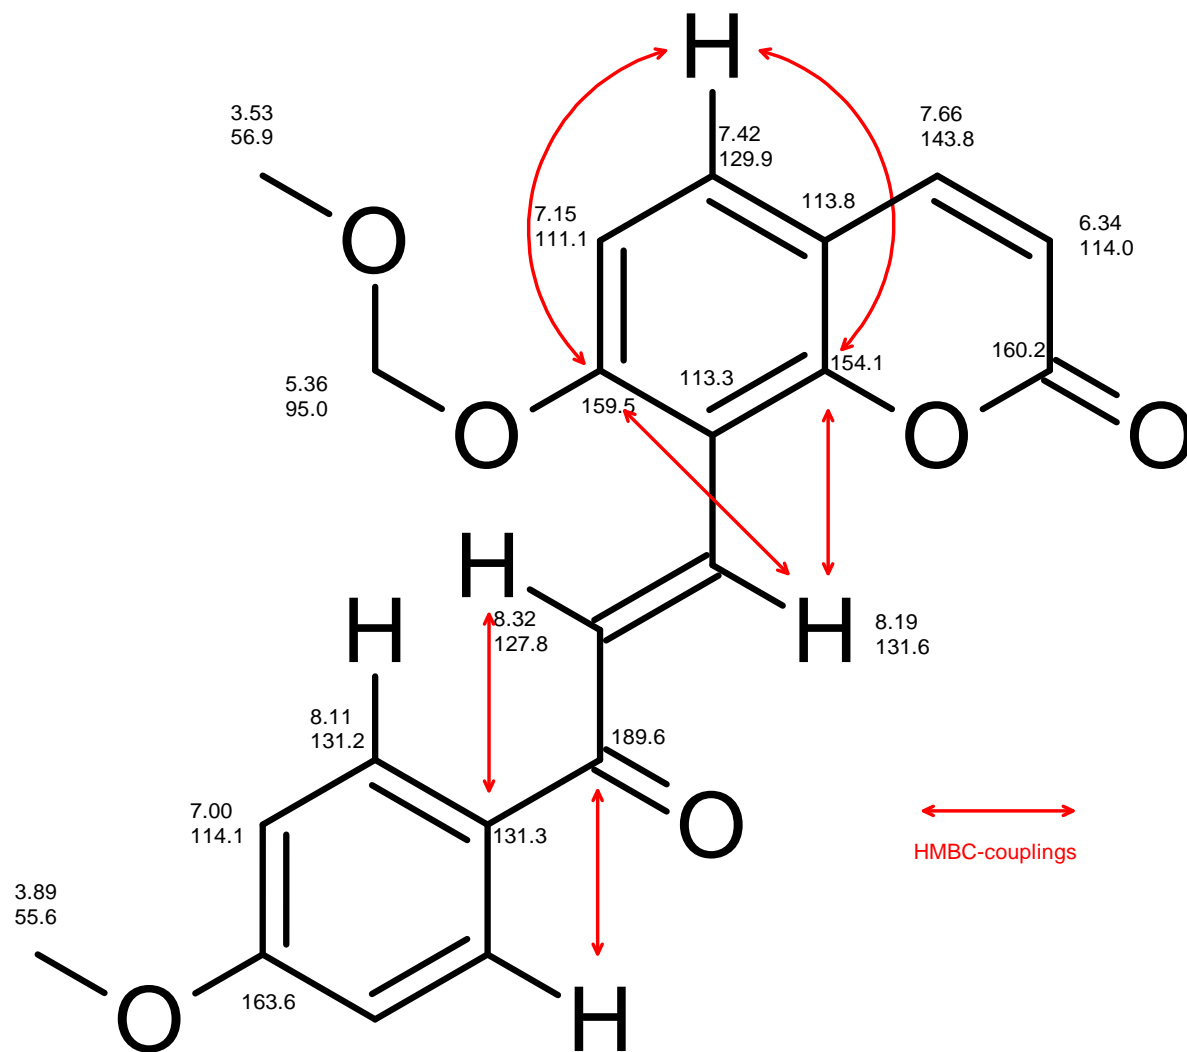

**Figure S107:**  $^1\text{H}$  NMR (400 MHz,  $\text{CDCl}_3$ ) of **13af**

NEO400\_2023-1005\_mak.10.fid  
694sf1

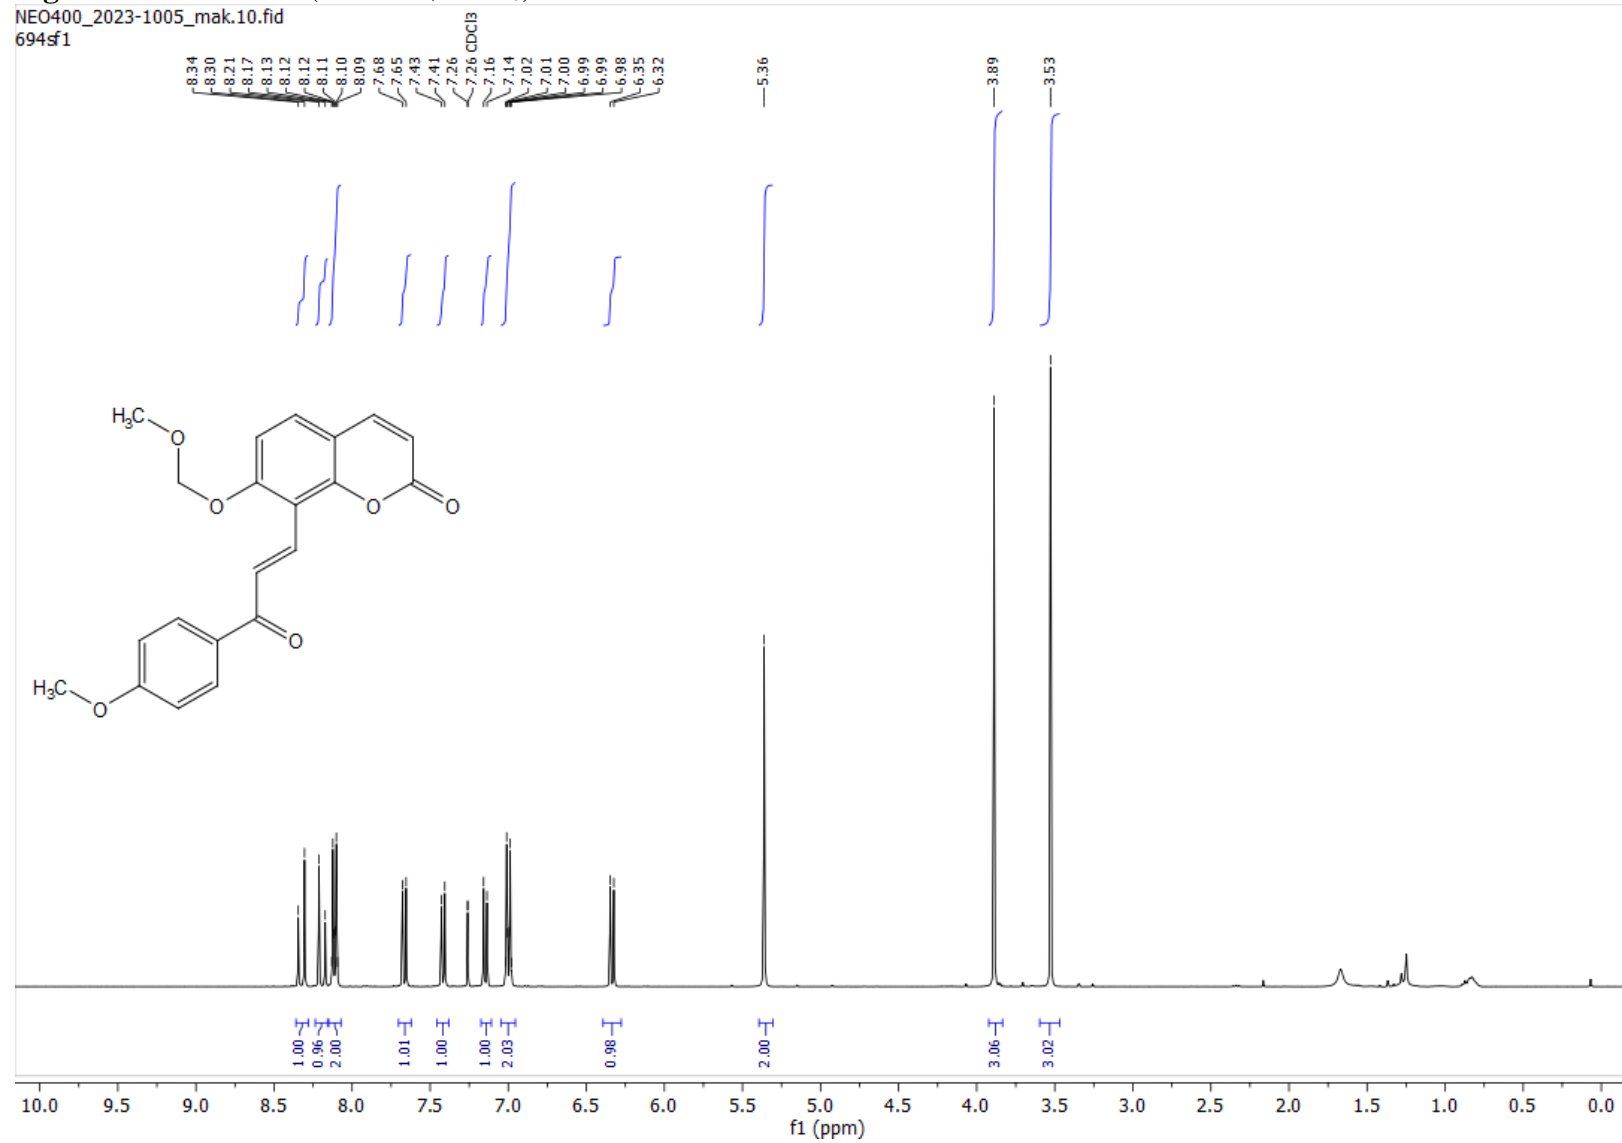

**Figure S108:**  $^{13}\text{C}\{^1\text{H}\}$  NMR (100 MHz,  $\text{CDCl}_3$ ) of **13af**

NEO400\_2023-1005\_mak.11.fid

694sf1

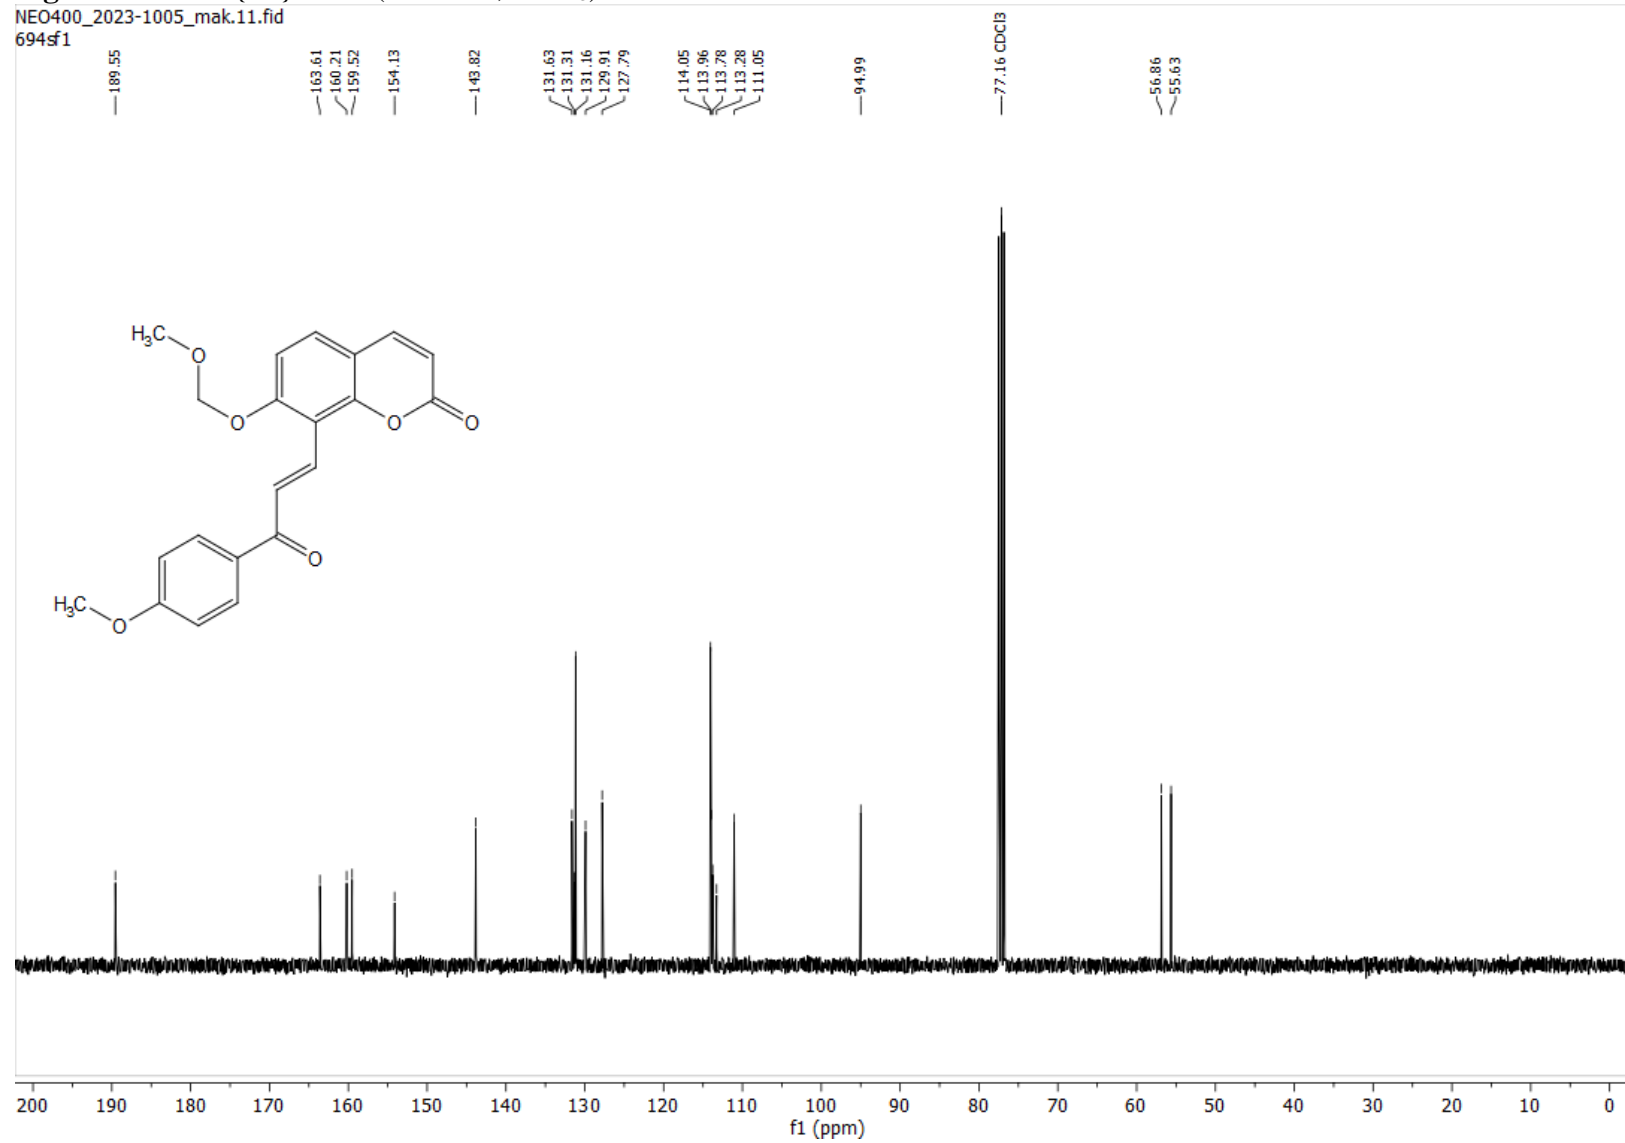

**Figure S109:** COSY (400 MHz, CDCl<sub>3</sub>) of **13af**

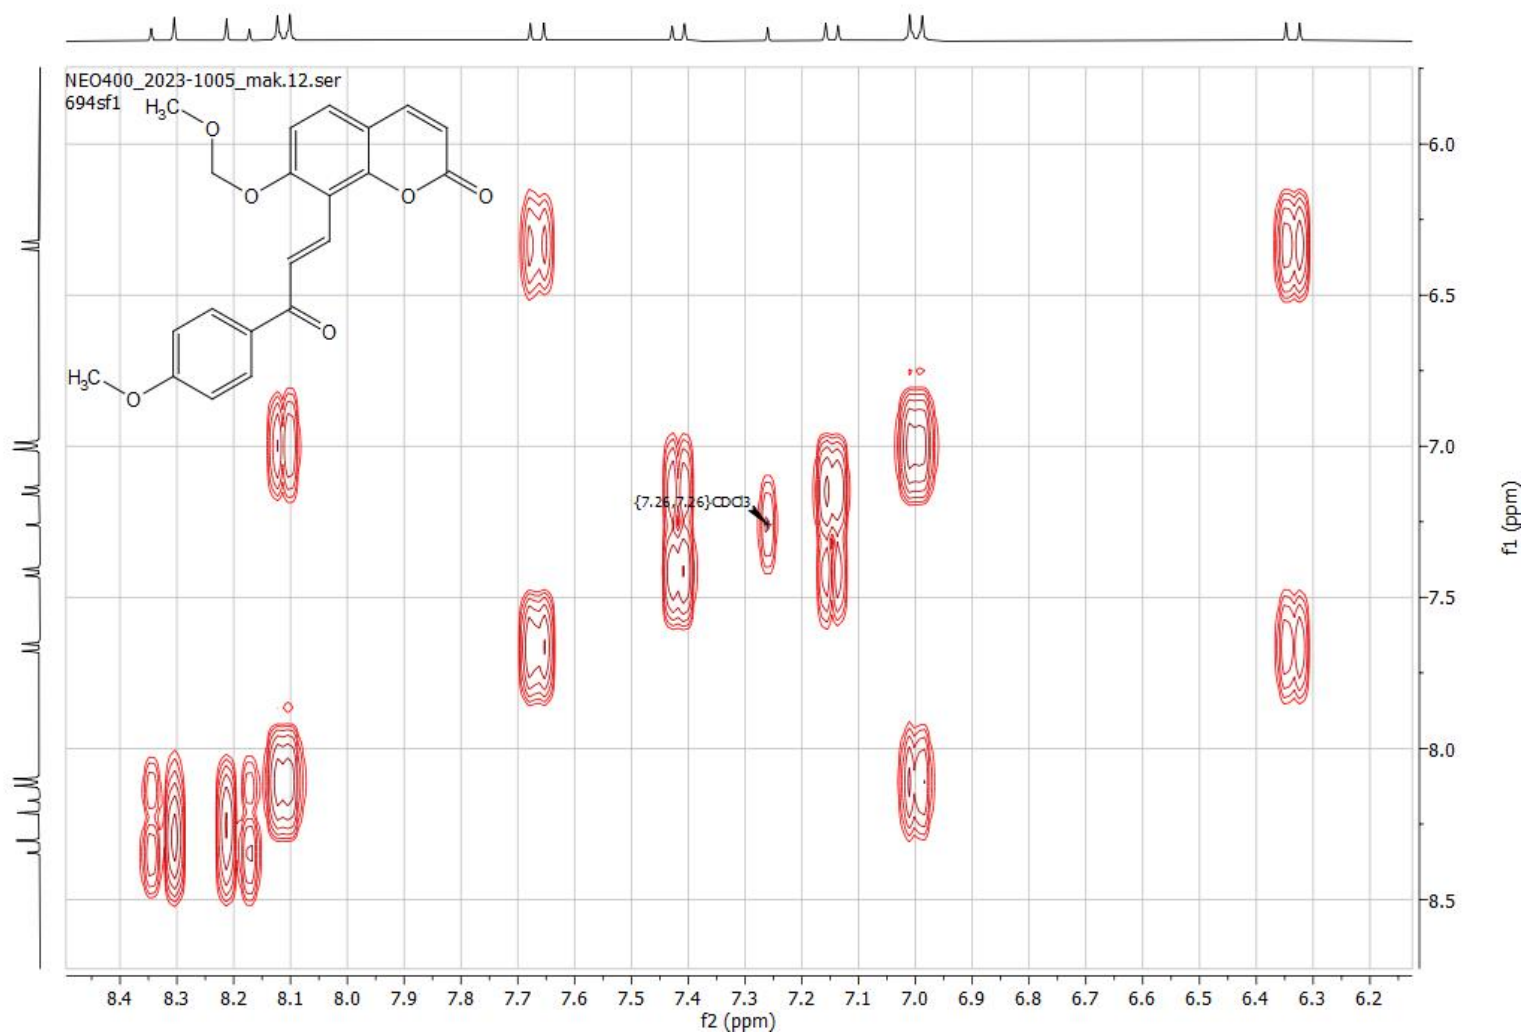



Figure S110: HSQC (400/100 MHz, CDCl<sub>3</sub>) of **13af**

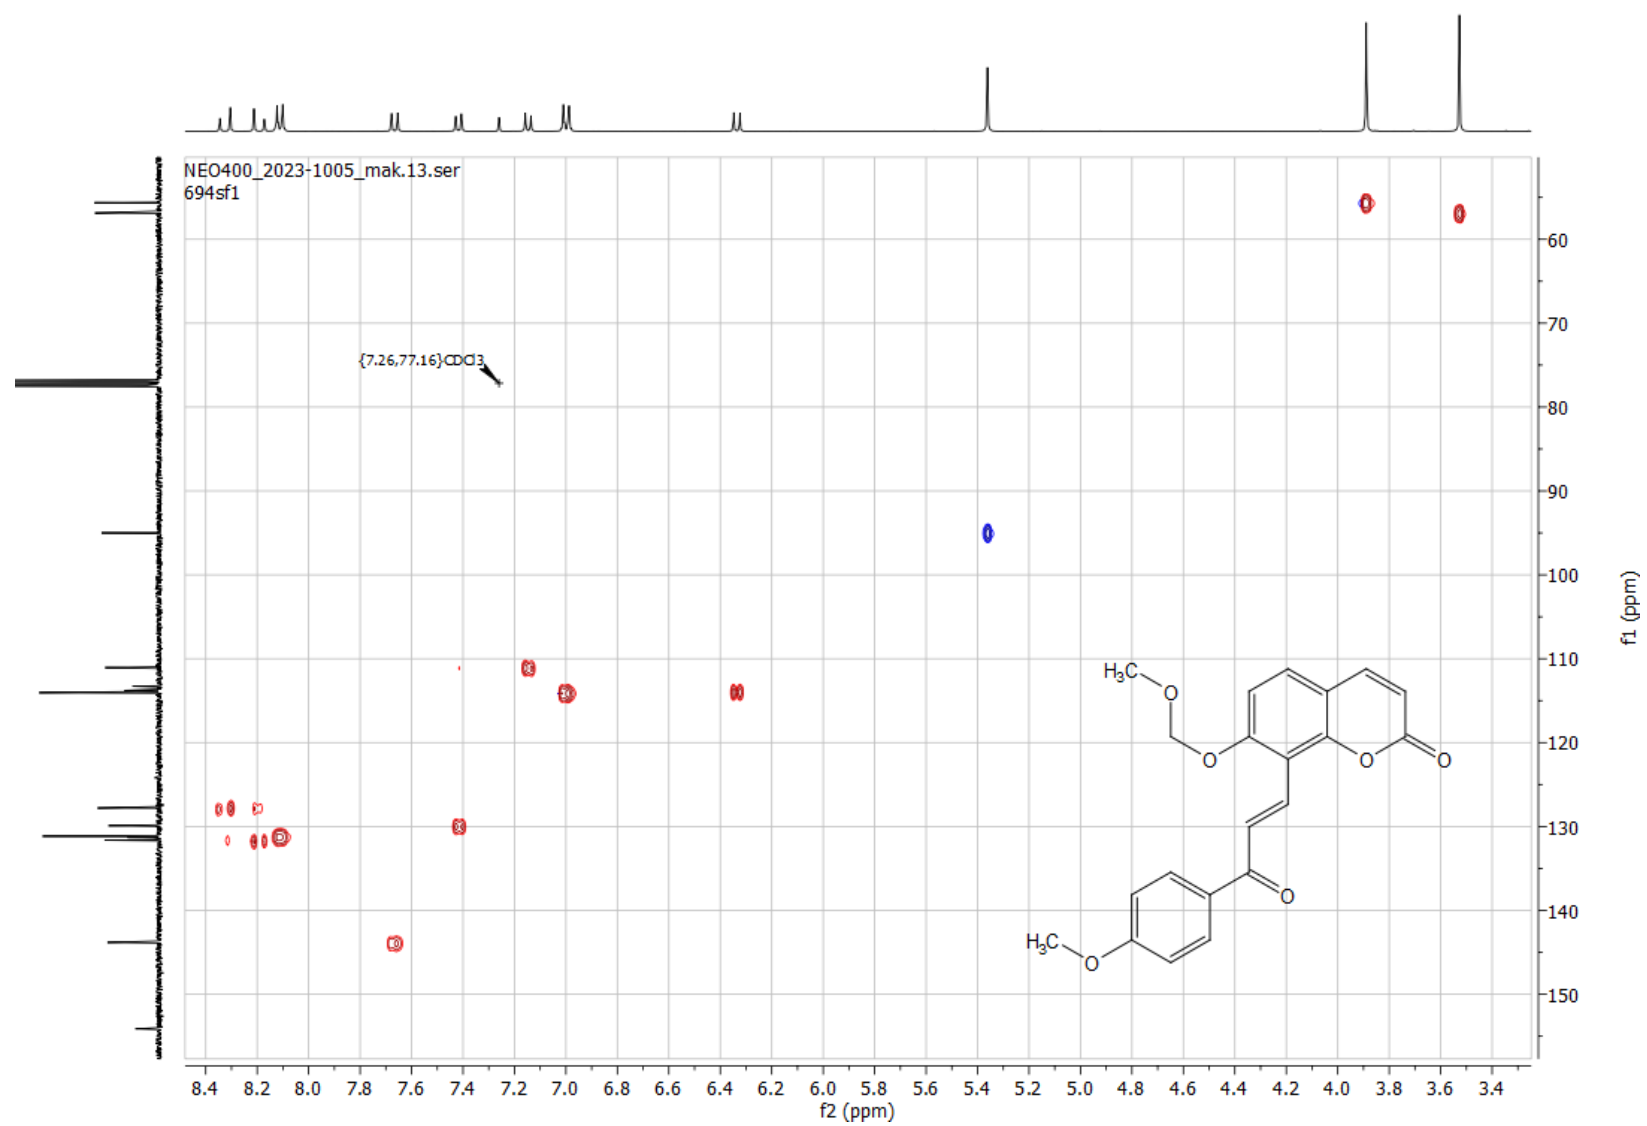

Figure S111: HMBC (400/100 MHz, CDCl<sub>3</sub>) of 13af

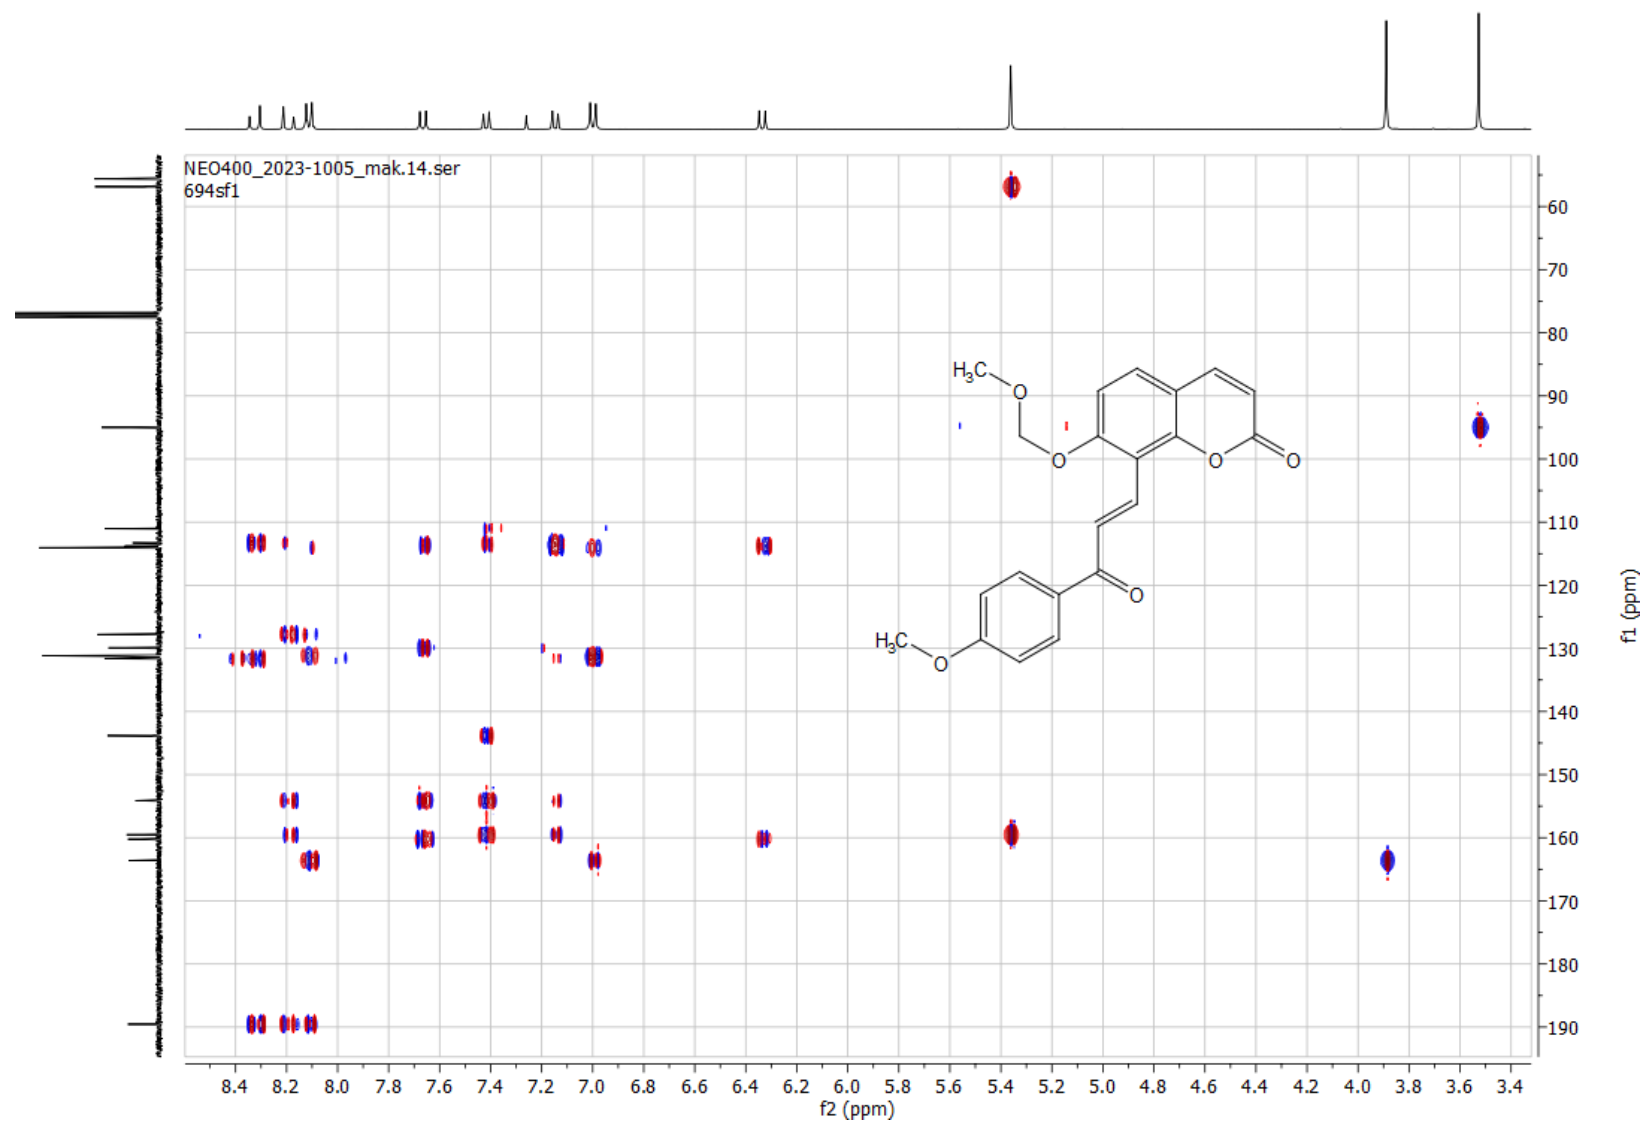

Figure S112: NOESY (400 MHz, CDCl<sub>3</sub>) of 13af

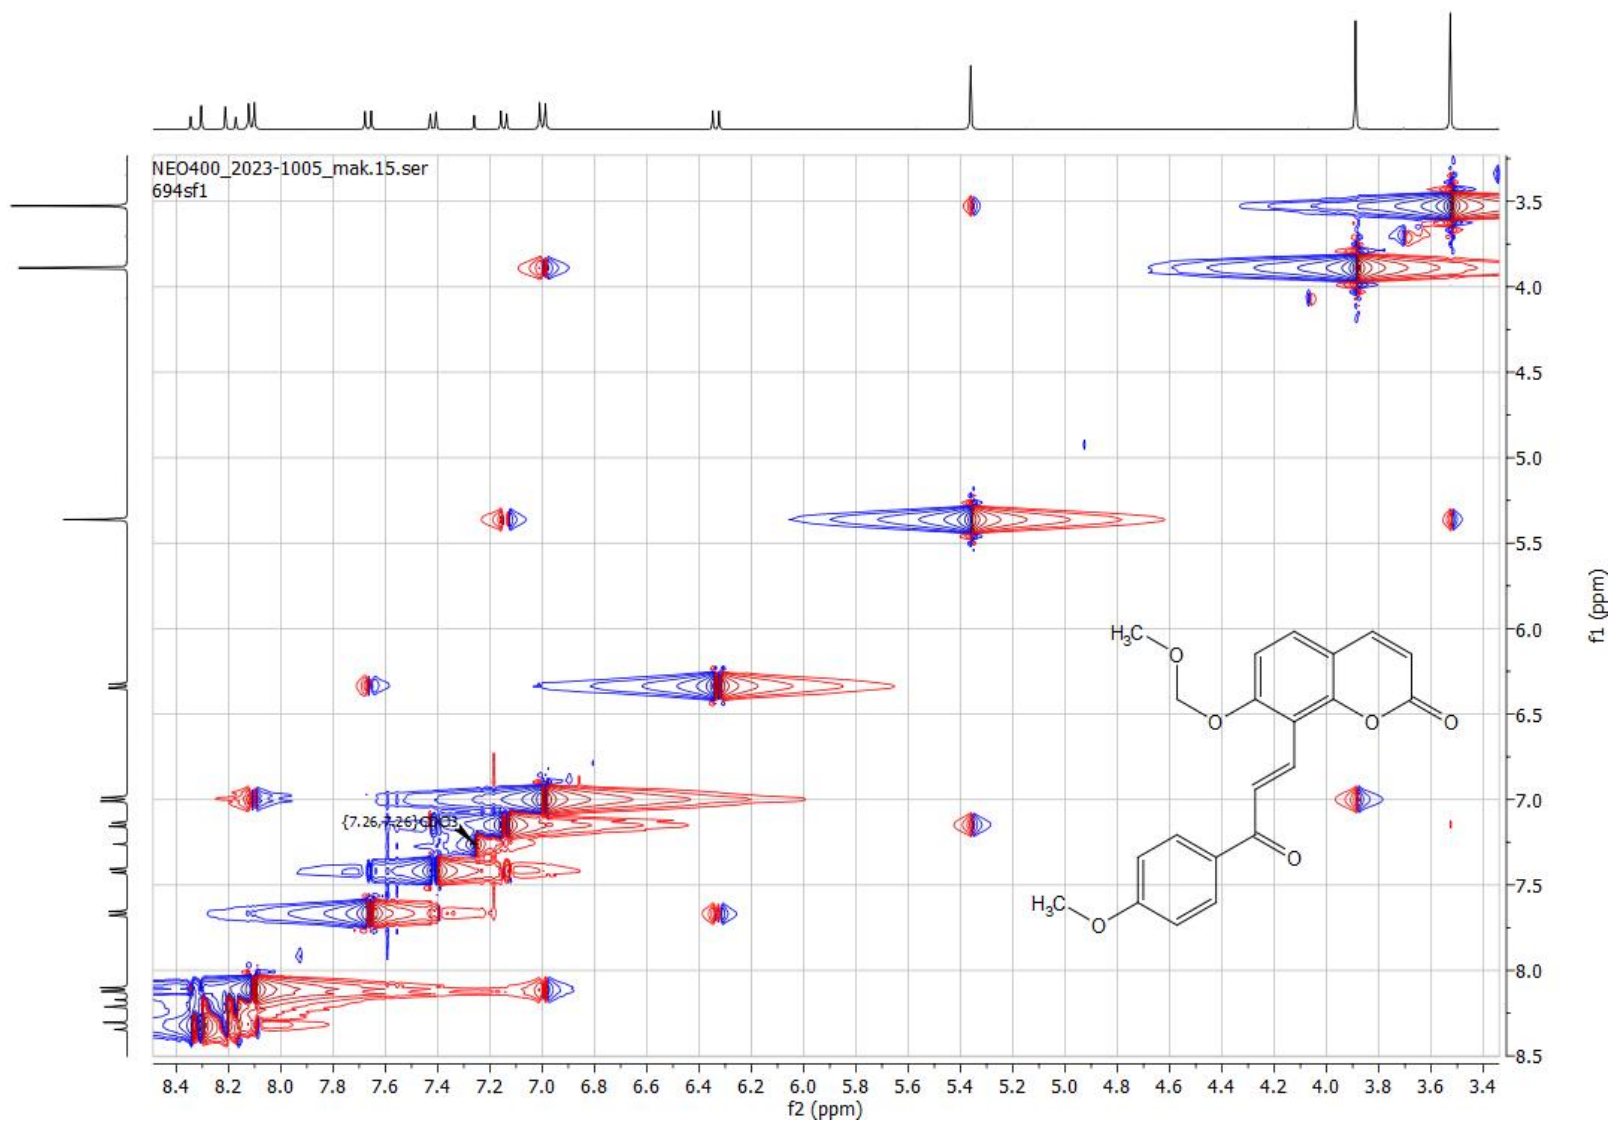

**Figure S113:**  $^1\text{H}$  NMR (400 MHz,  $\text{CDCl}_3$ ) of **13ai**

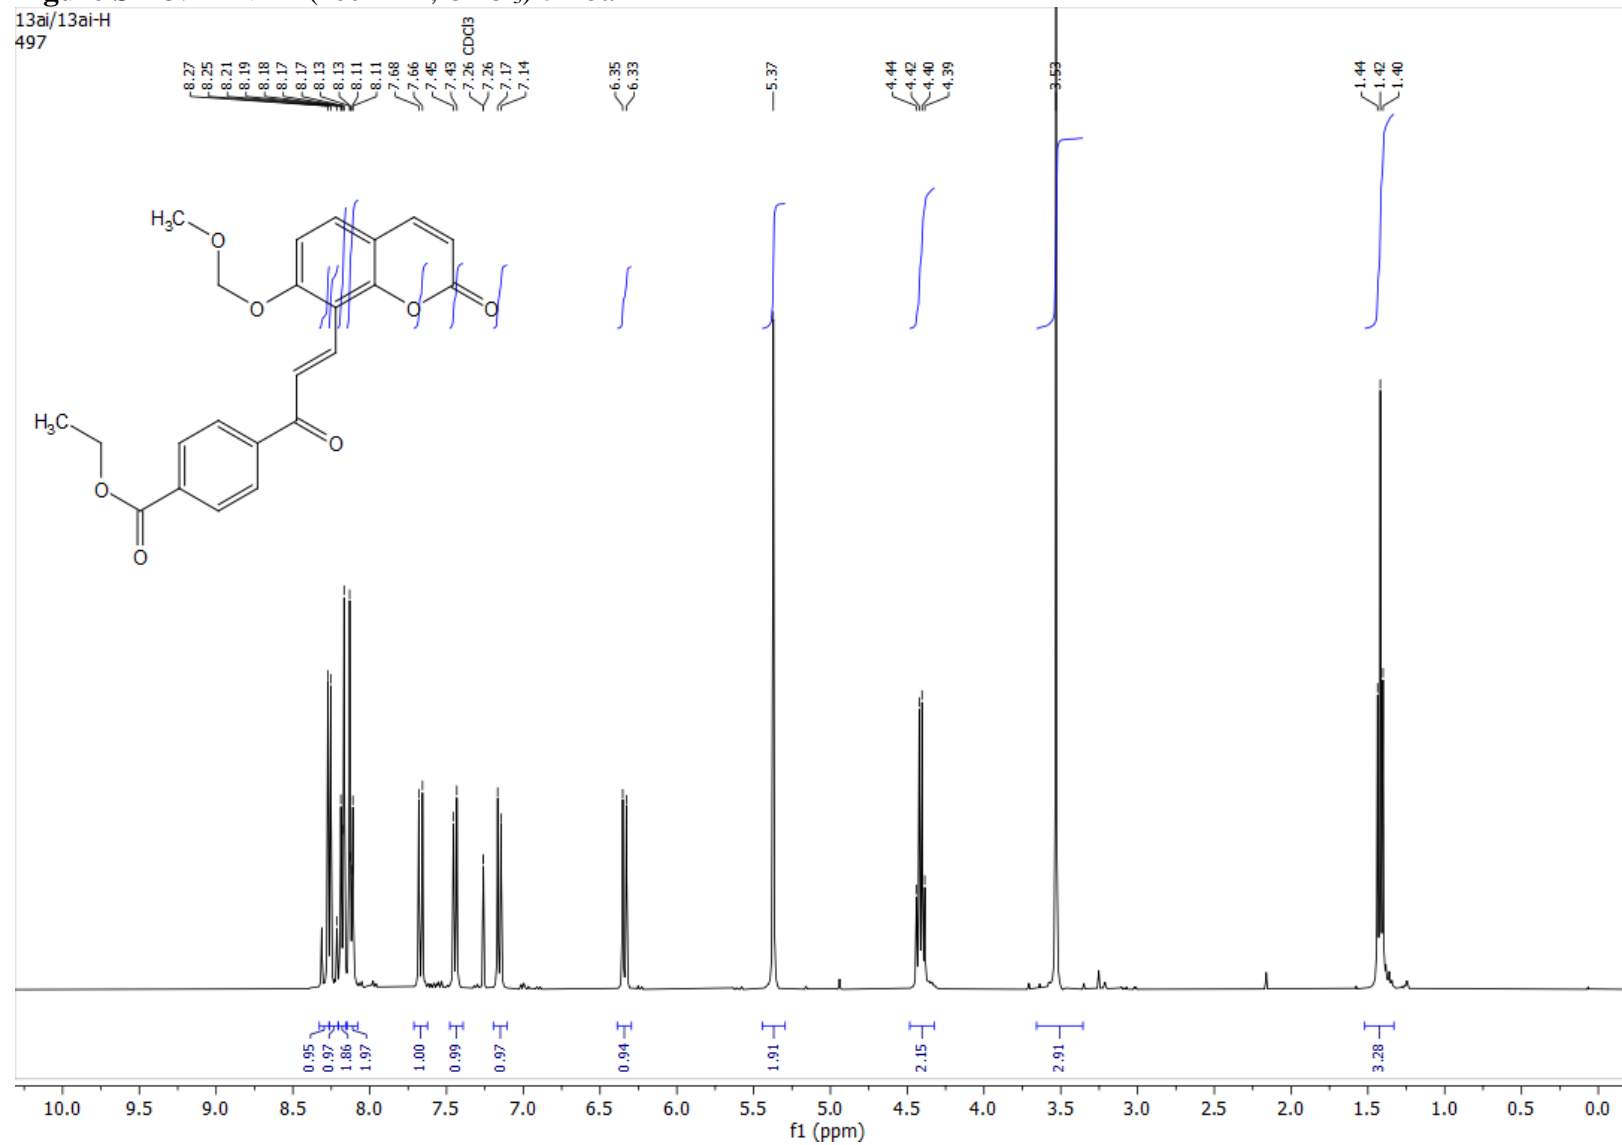

**Figure S114:**  $^{13}\text{C}\{^1\text{H}\}$  NMR (100 MHz,  $\text{CDCl}_3$ ) of **13ai**

13ai/13ai-C  
497

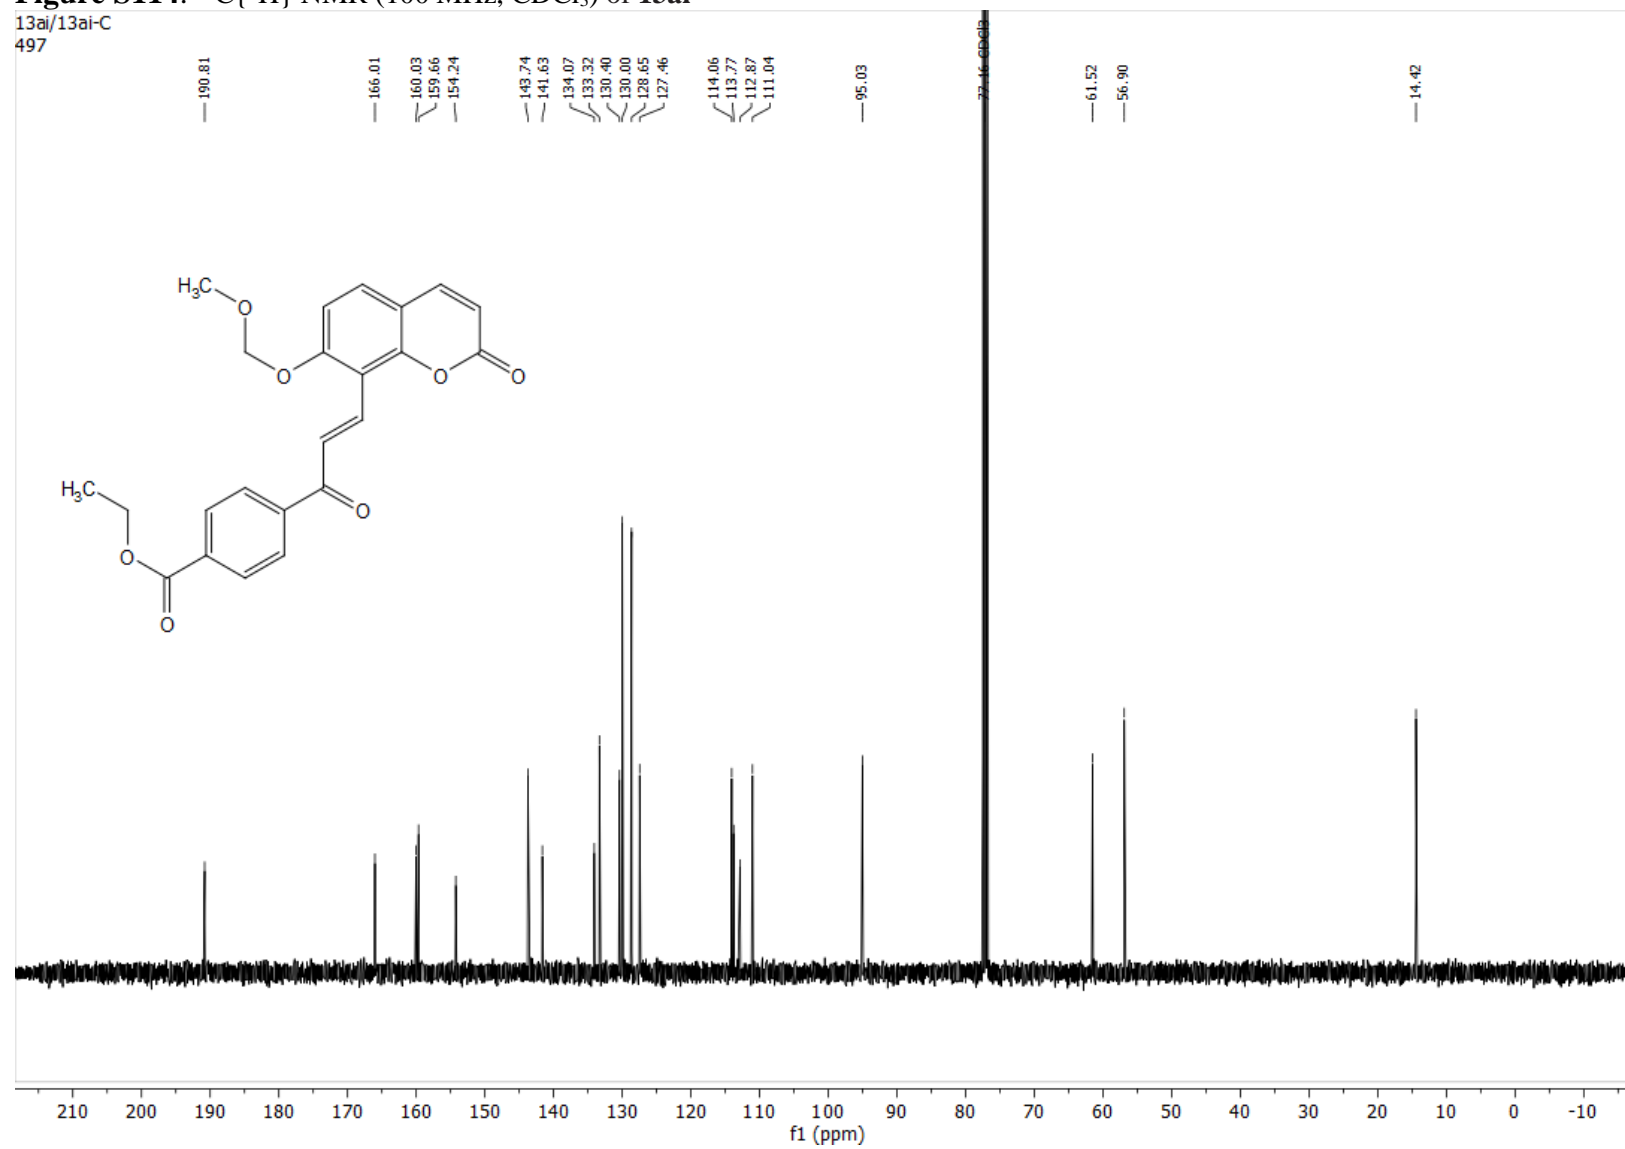

**Figure S115:**  $^1\text{H}$  NMR (400 MHz,  $\text{CDCl}_3$ ) of **13ak**

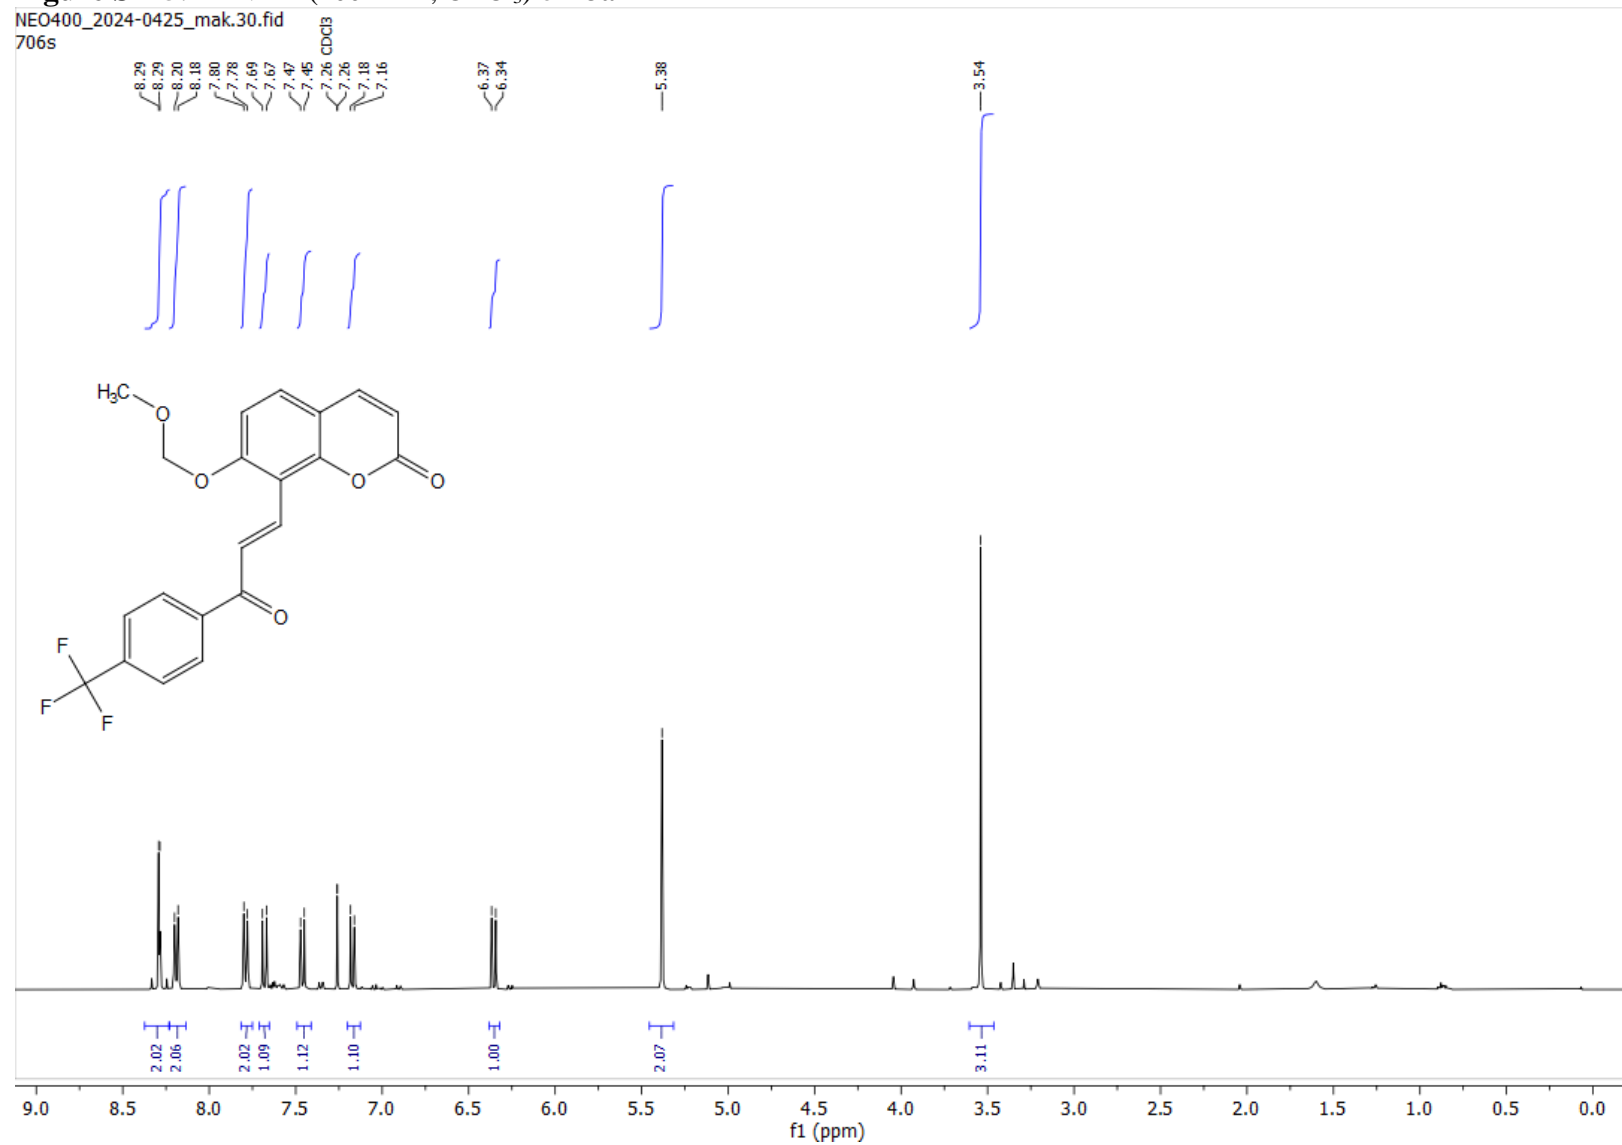

**Figure S116:**  $^{13}\text{C}\{^1\text{H}\}$  NMR (100 MHz,  $\text{CDCl}_3$ ) of **13ak**

NEO400\_2024-0426\_mak.10.fid

706s

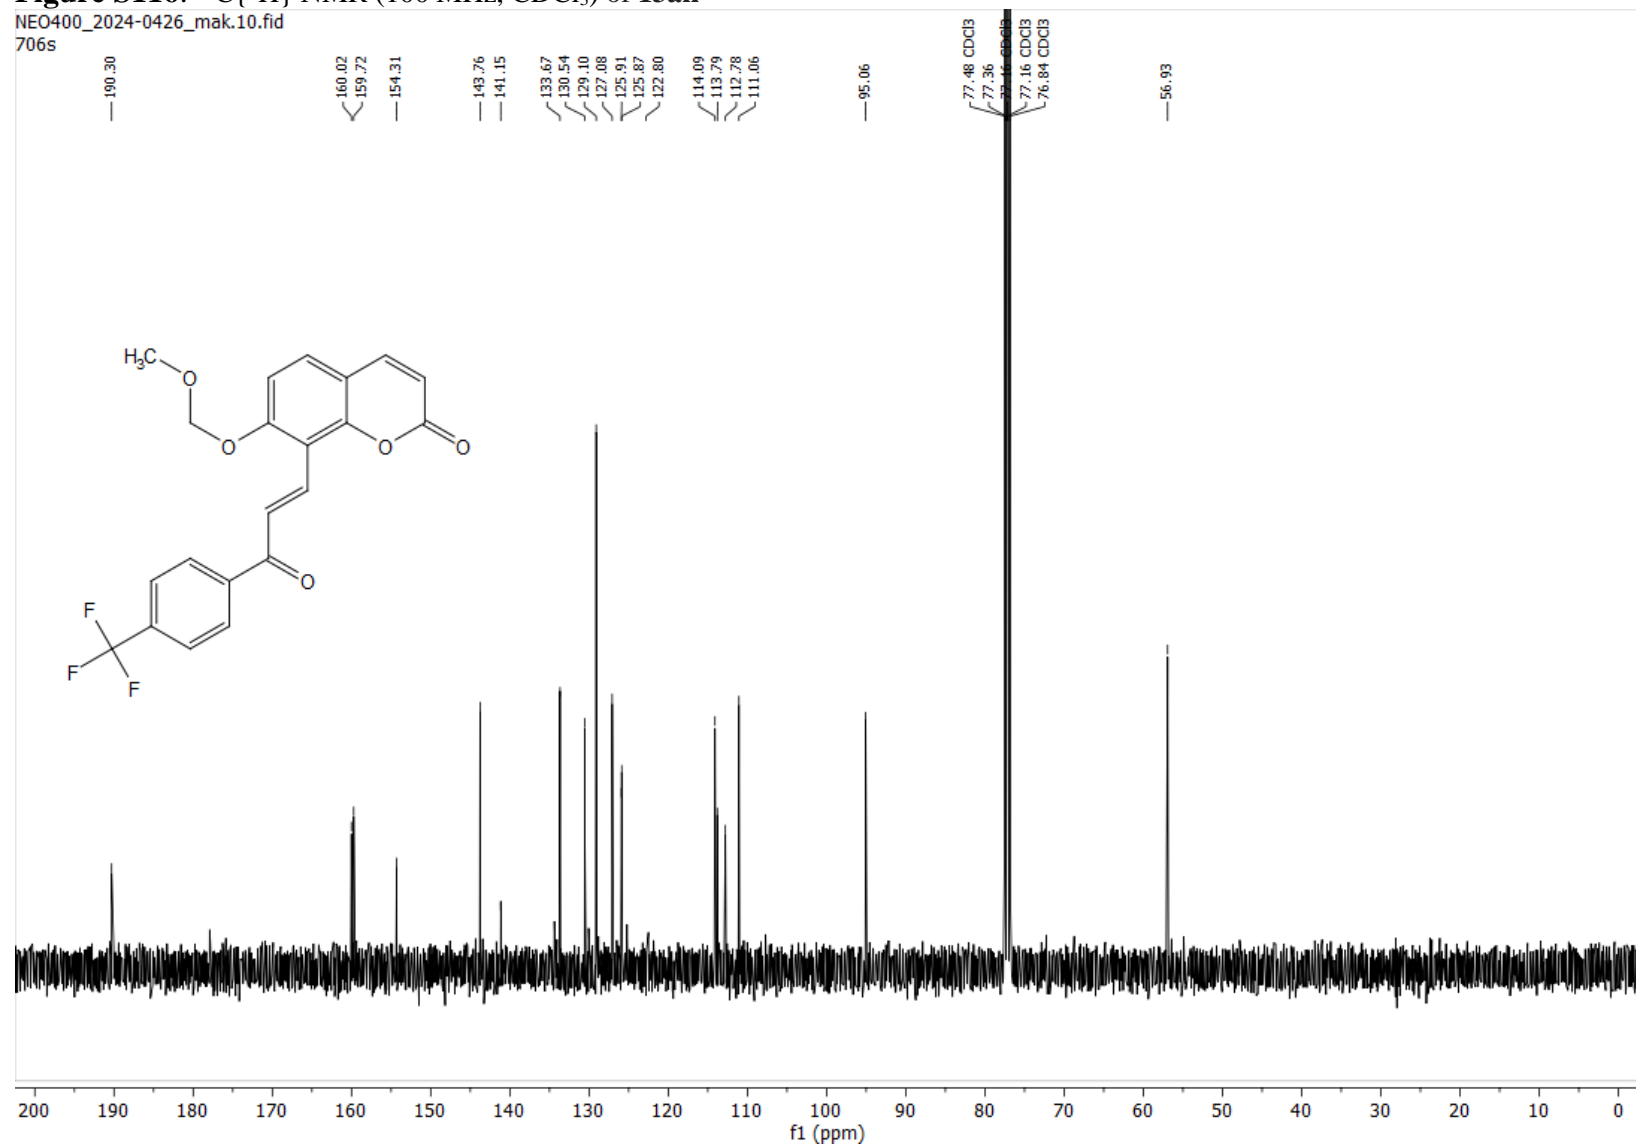

**Figure S117:**  $^1\text{H}$  NMR (400 MHz,  $\text{CDCl}_3$ ) of **13al**

703sf3.50.fid  
703sf3

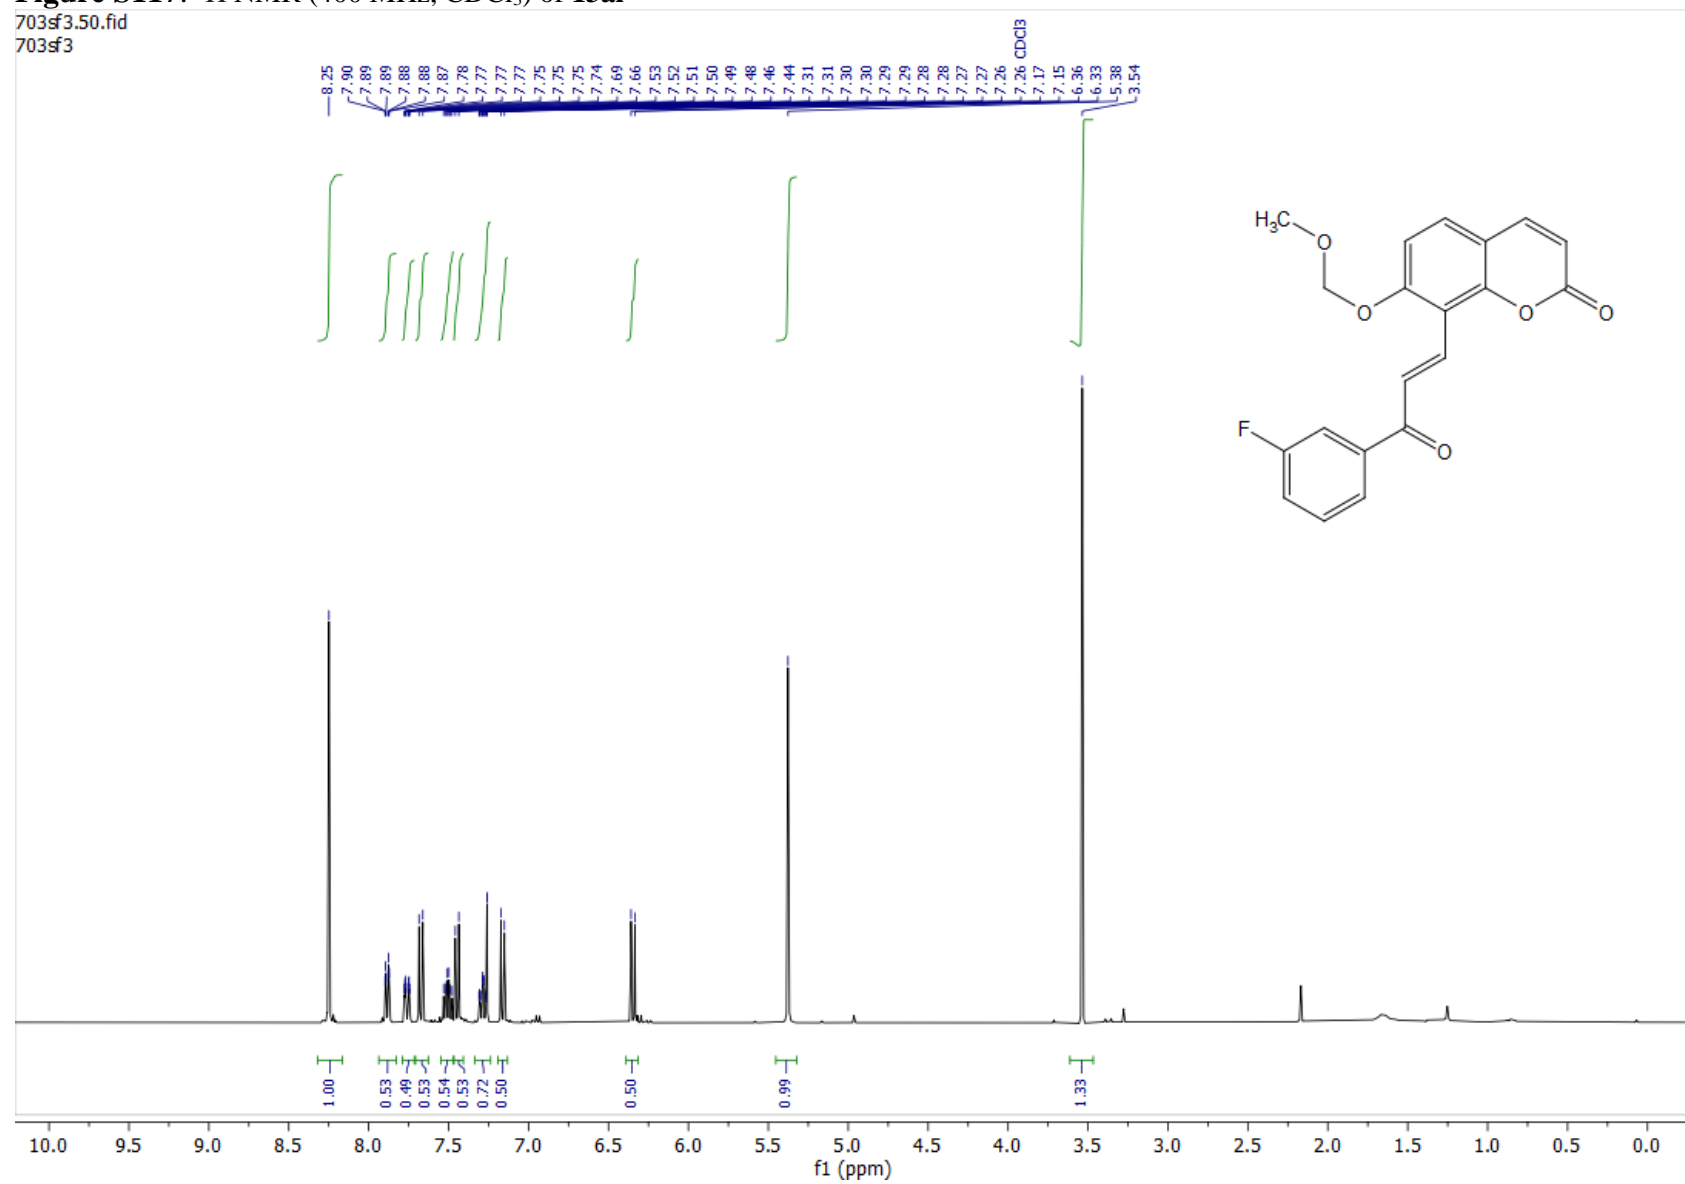



**Figure S118:**  $^{13}\text{C}\{^1\text{H}\}$  NMR (100 MHz,  $\text{CDCl}_3$ ) of **13al**

Desktop/13al-C  
703sf3

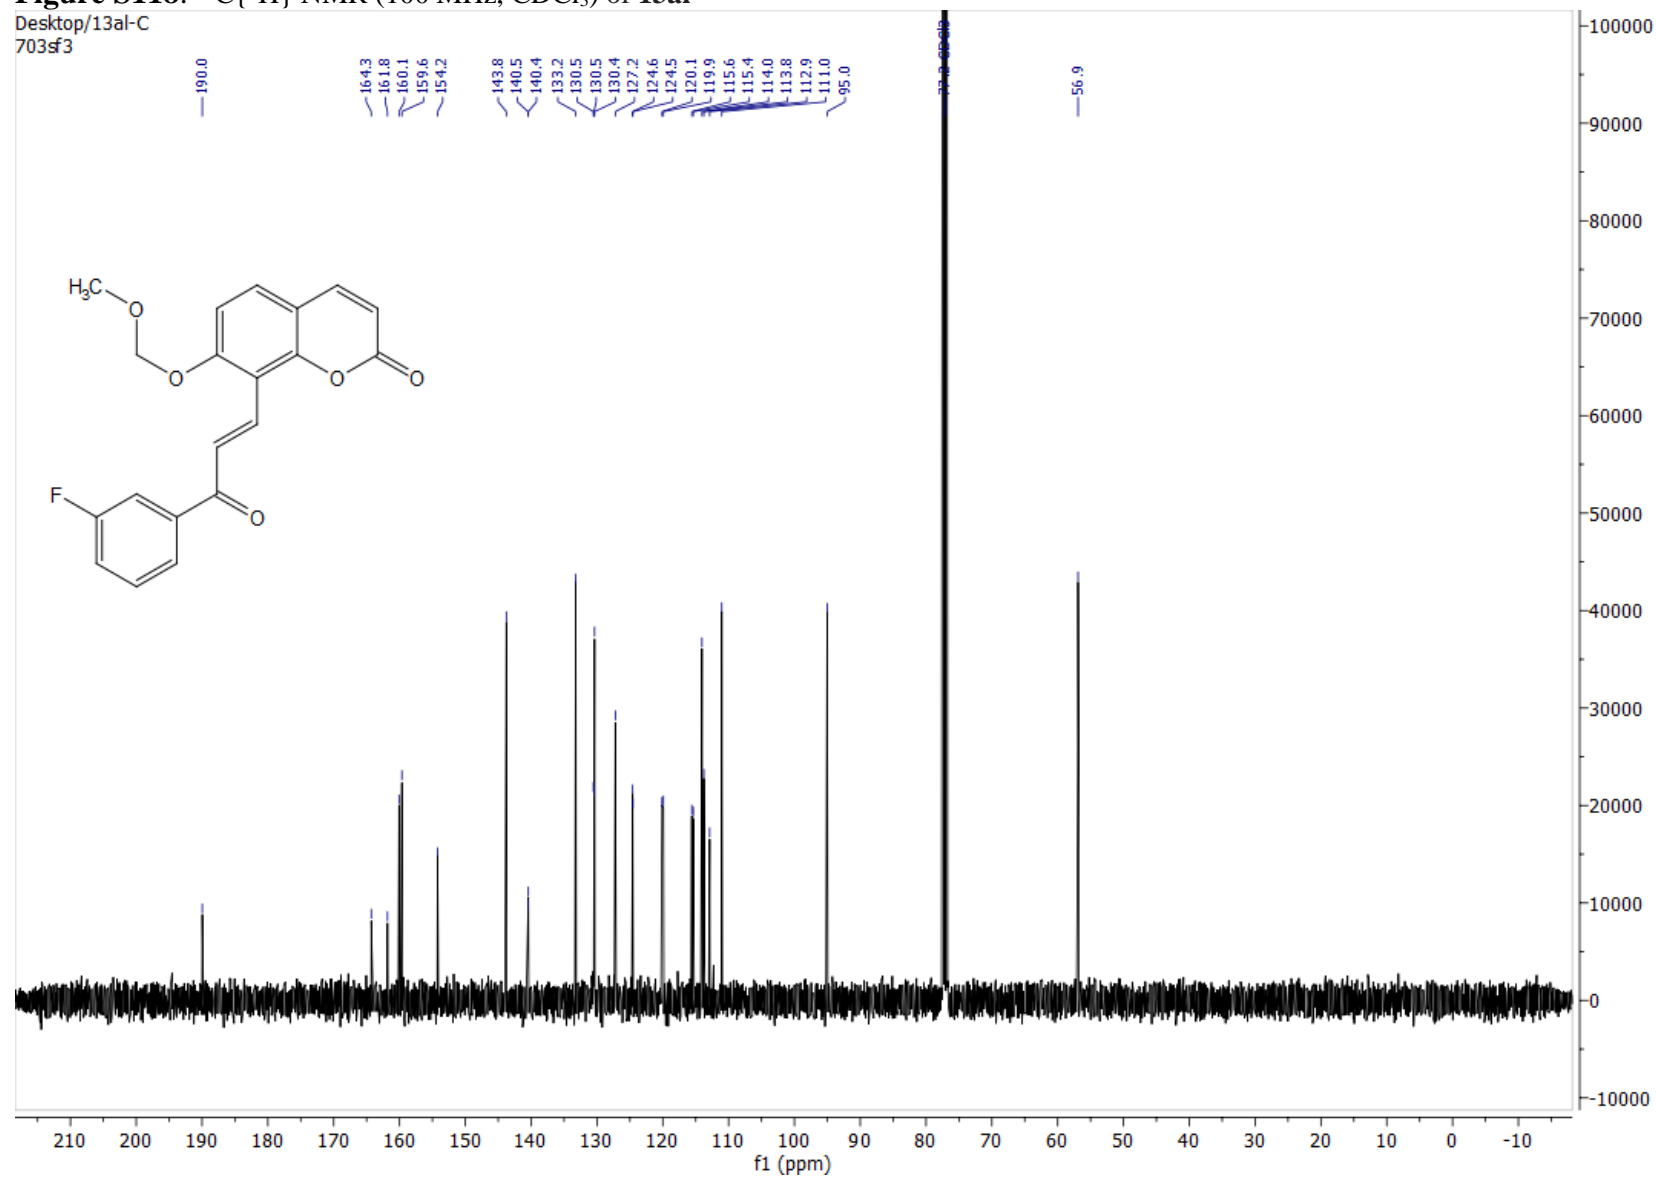

**Figure S119:**  $^1\text{H}$  NMR (400 MHz,  $\text{CDCl}_3$ ) of **13am**

NEO400\_2023-1117\_mak.60.fid  
697s

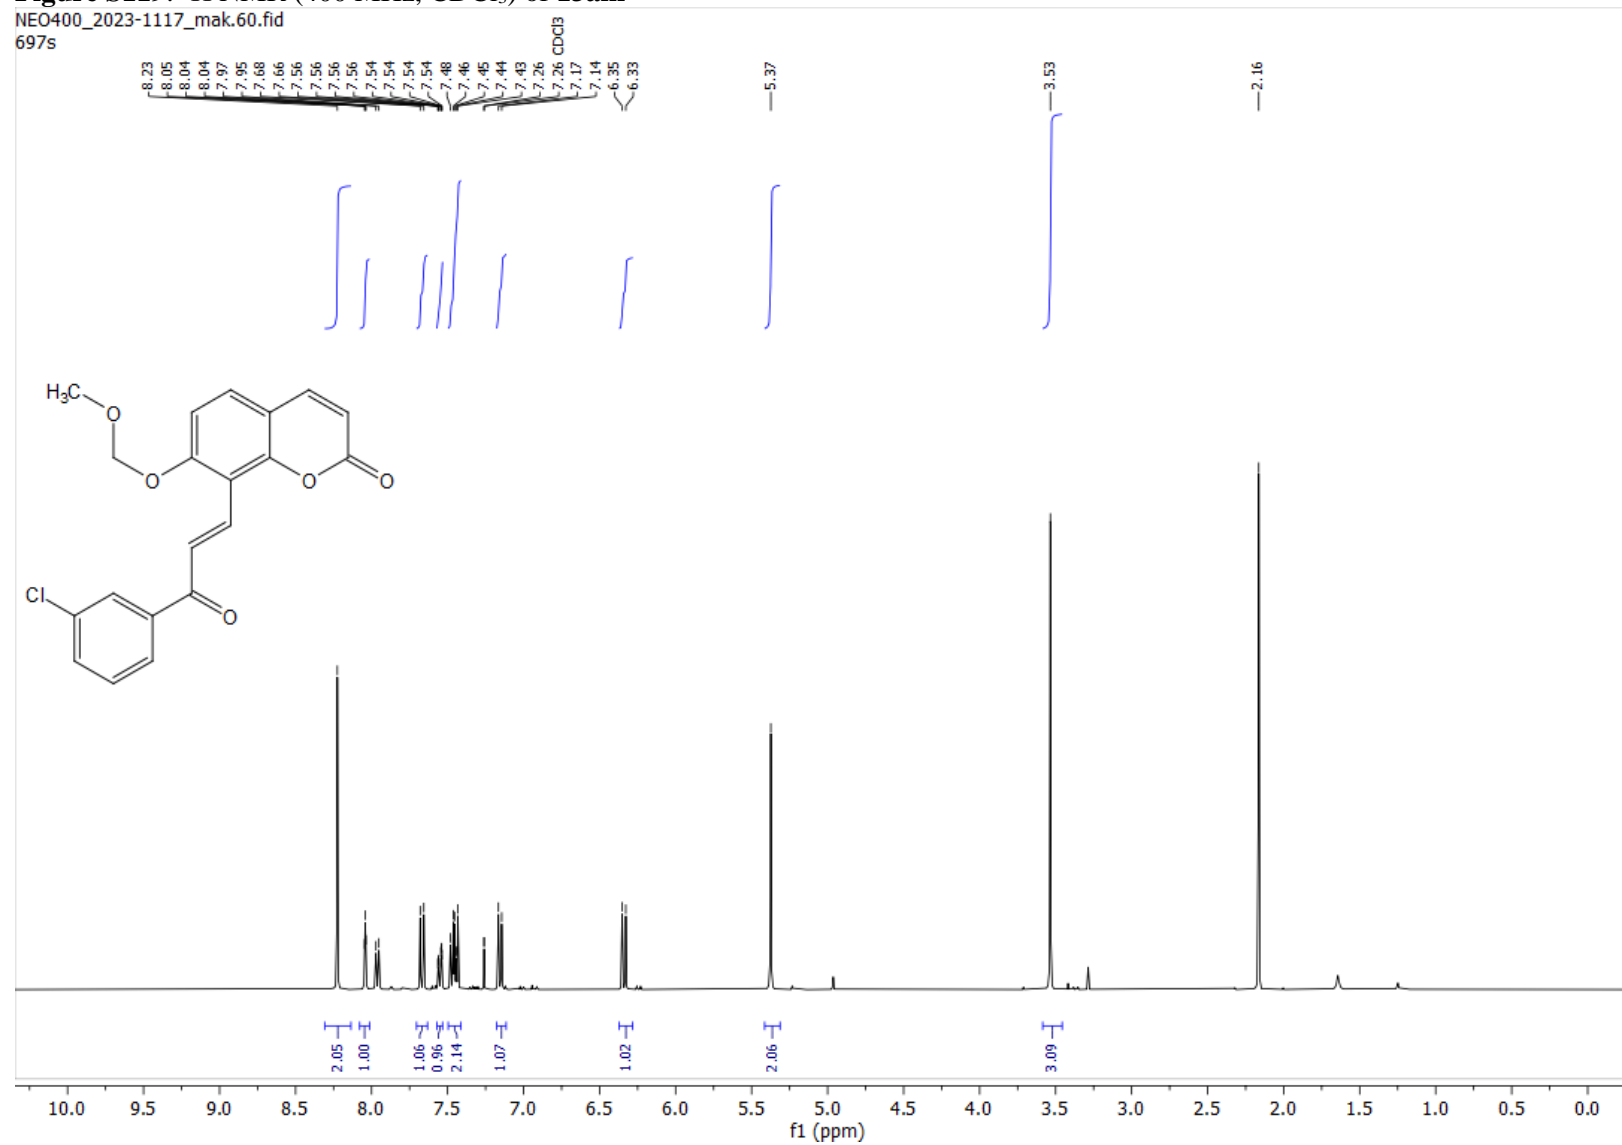

**Figure S120:**  $^{13}\text{C}\{^1\text{H}\}$  NMR (100 MHz,  $\text{CDCl}_3$ ) of **13am**

NEO400\_2023-1117\_mak.61.fid

697s

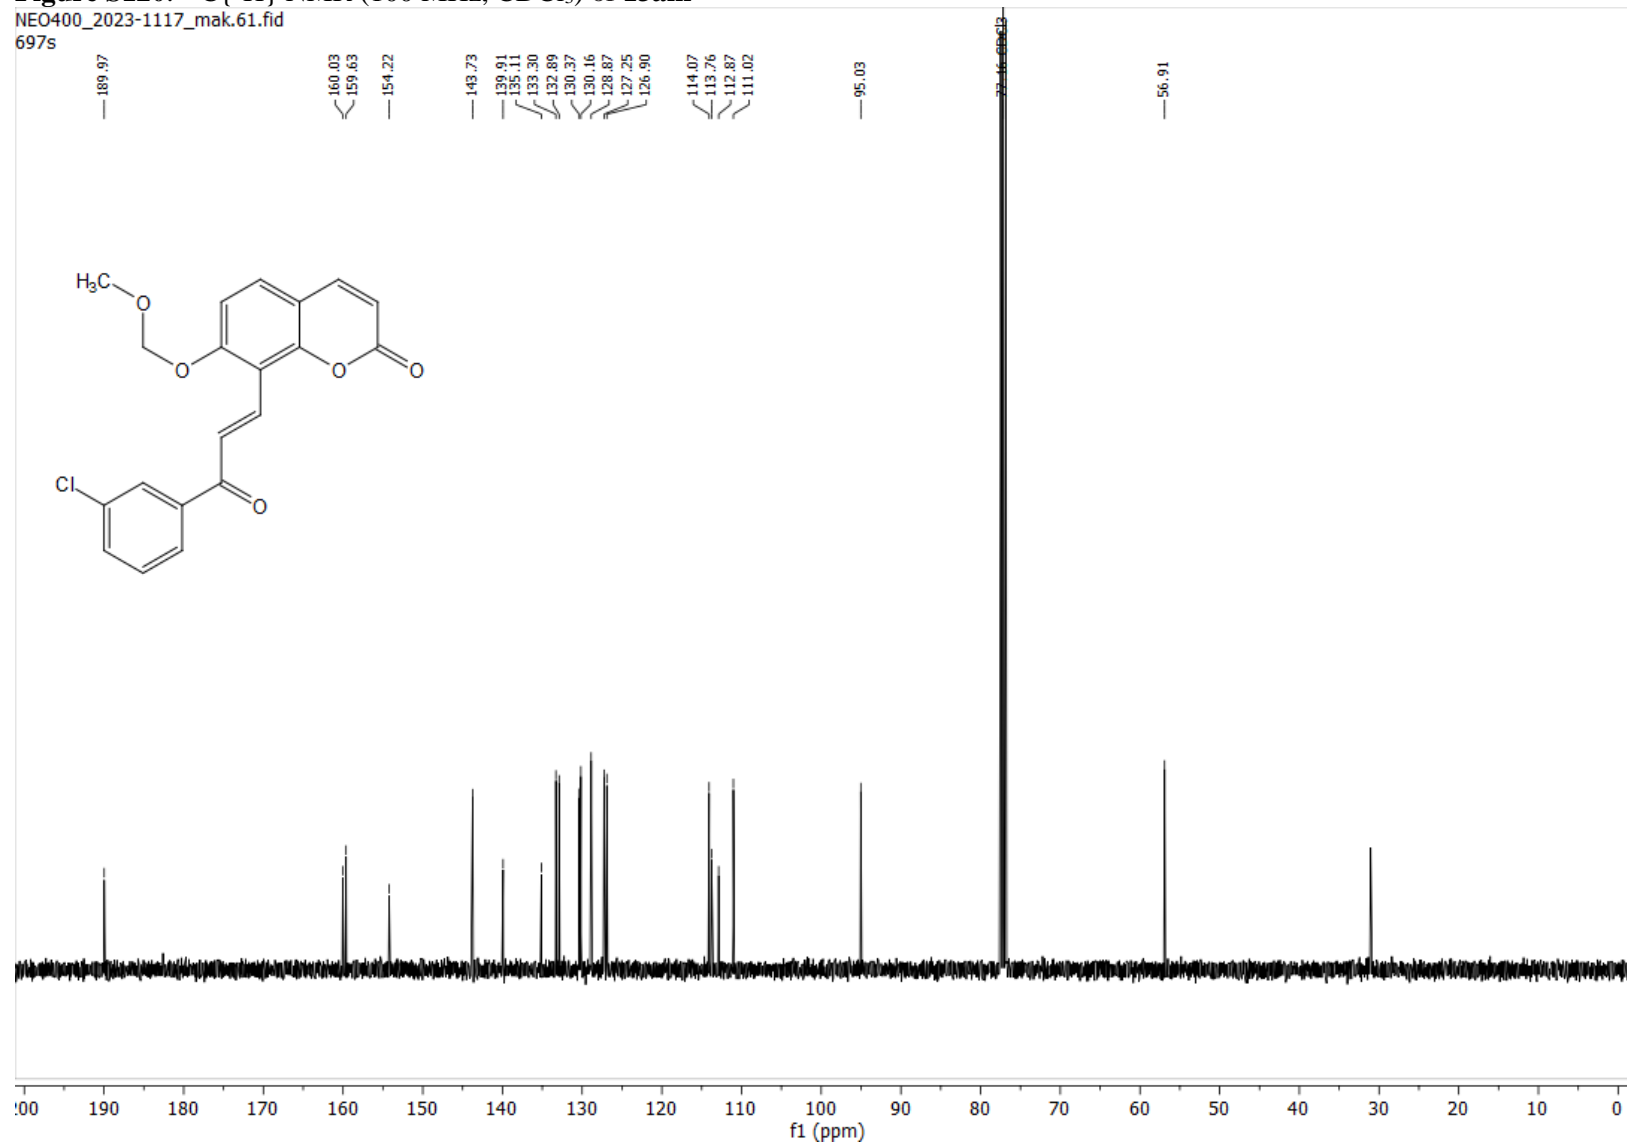

Figure S121: COSY (400 MHz, CDCl<sub>3</sub>) of **13am**

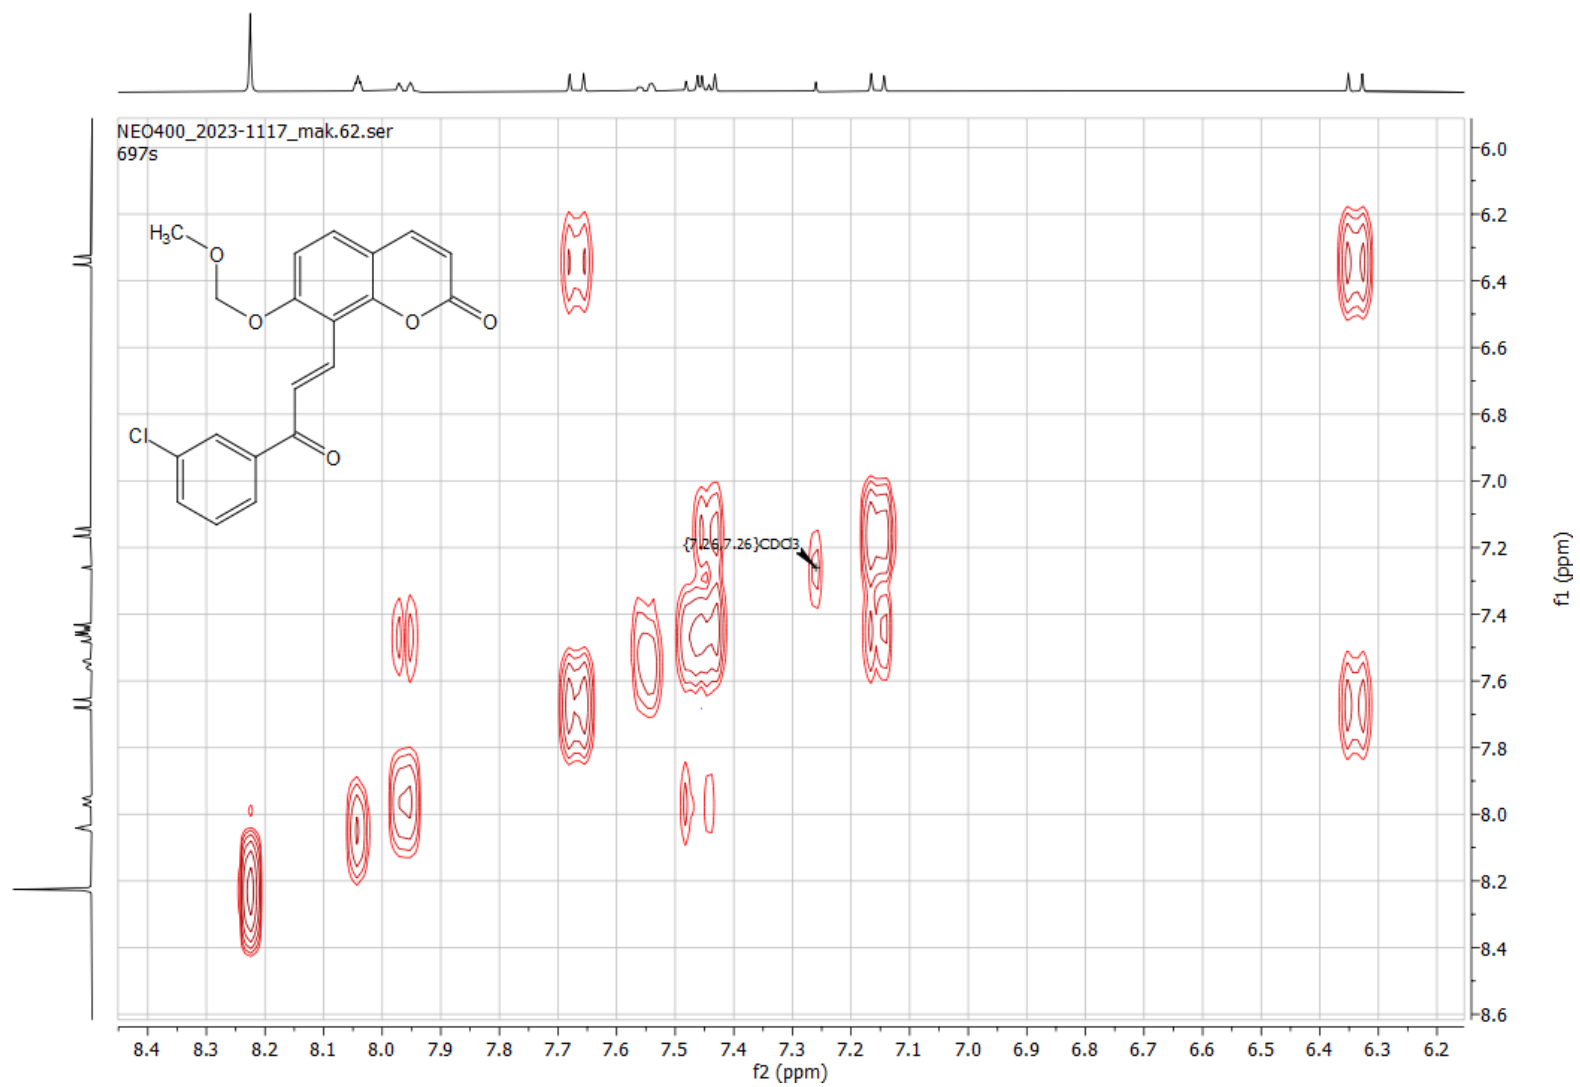

Figure S122: HSQC (400/100 MHz, CDCl<sub>3</sub>) of 13am

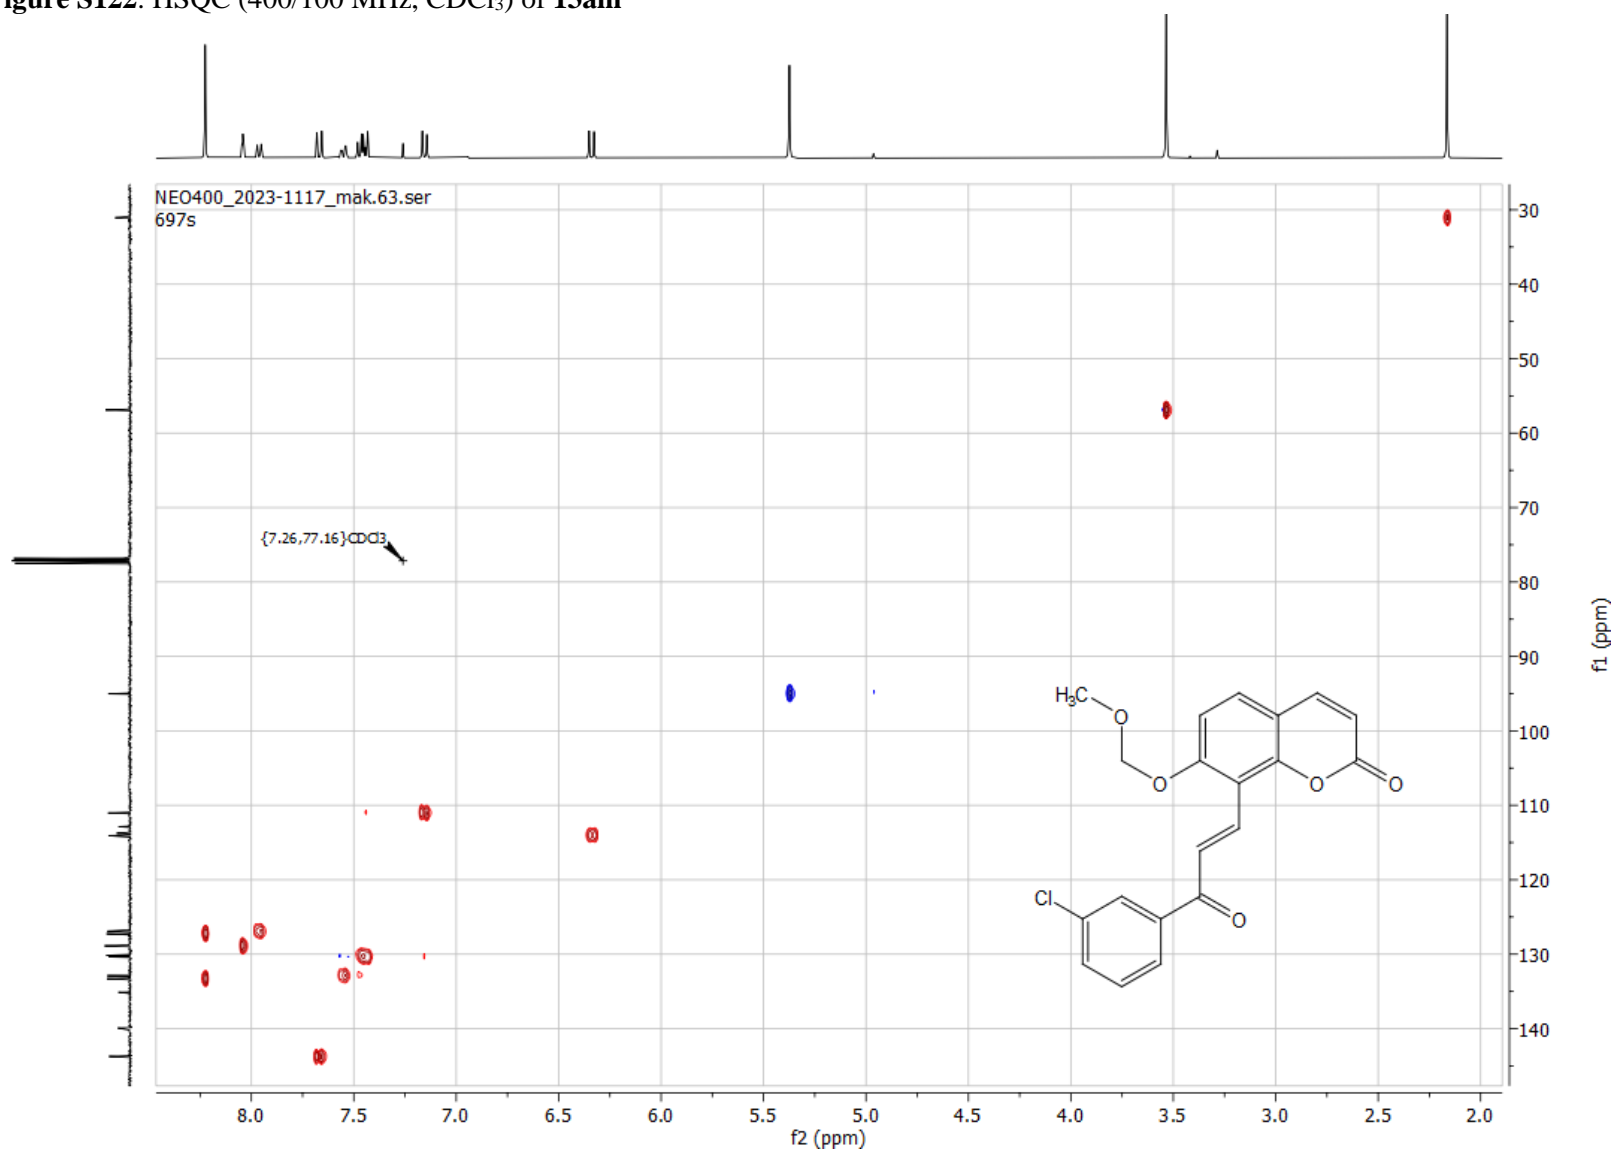

Figure S123: HMBC (400/100 MHz, CDCl<sub>3</sub>) of **13am**

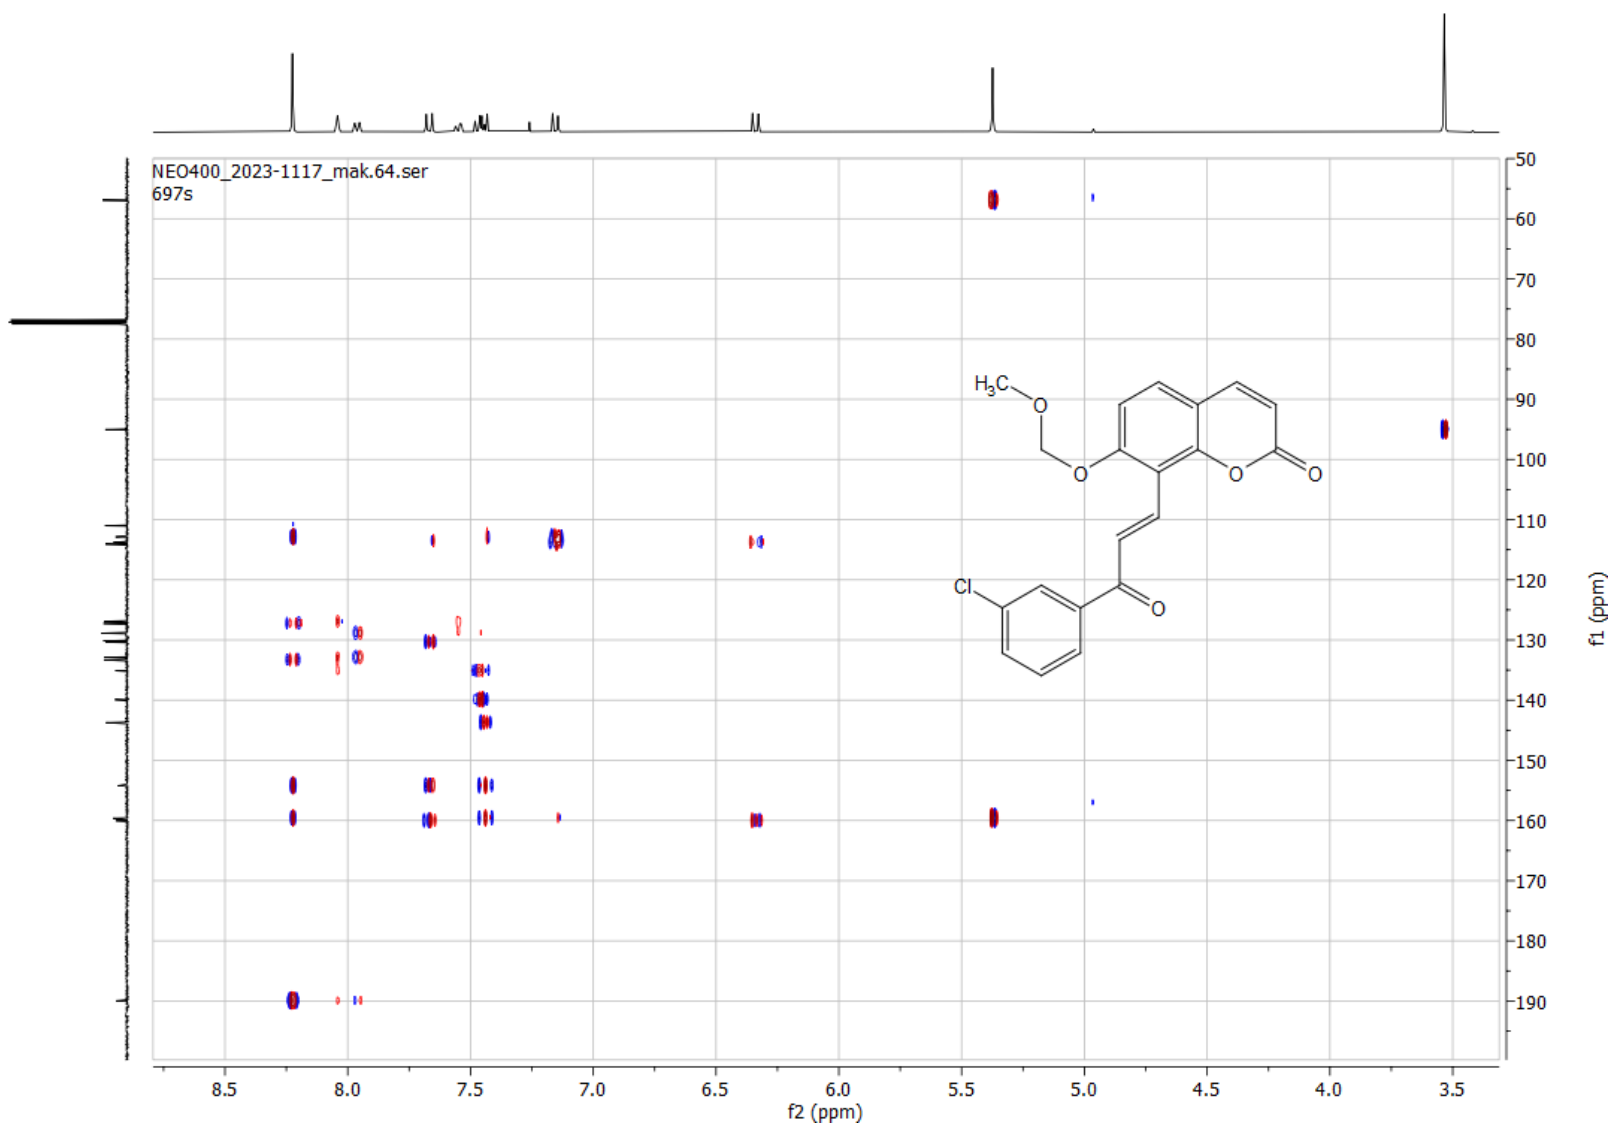

Figure S124: NOESY (400 MHz, CDCl<sub>3</sub>) of 13am

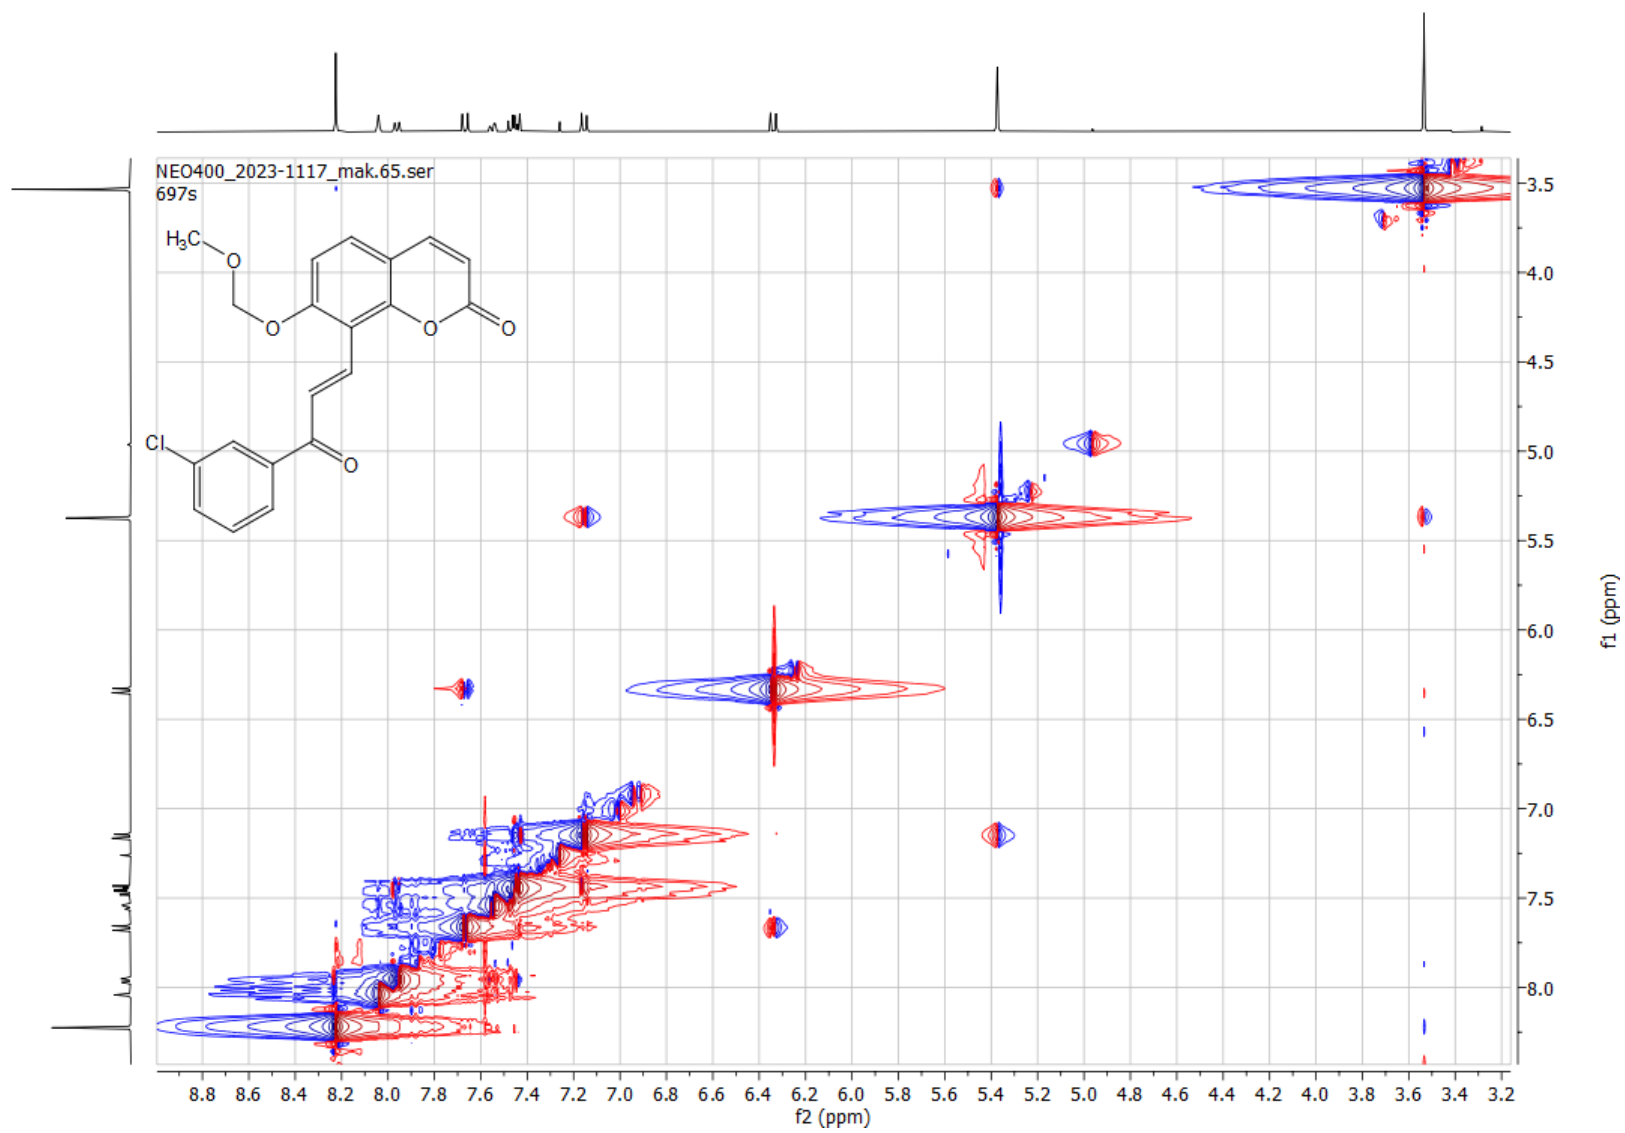

**Figure S125:** NMR-Signal assignment and selected HMBC-couplings for compound **14an**

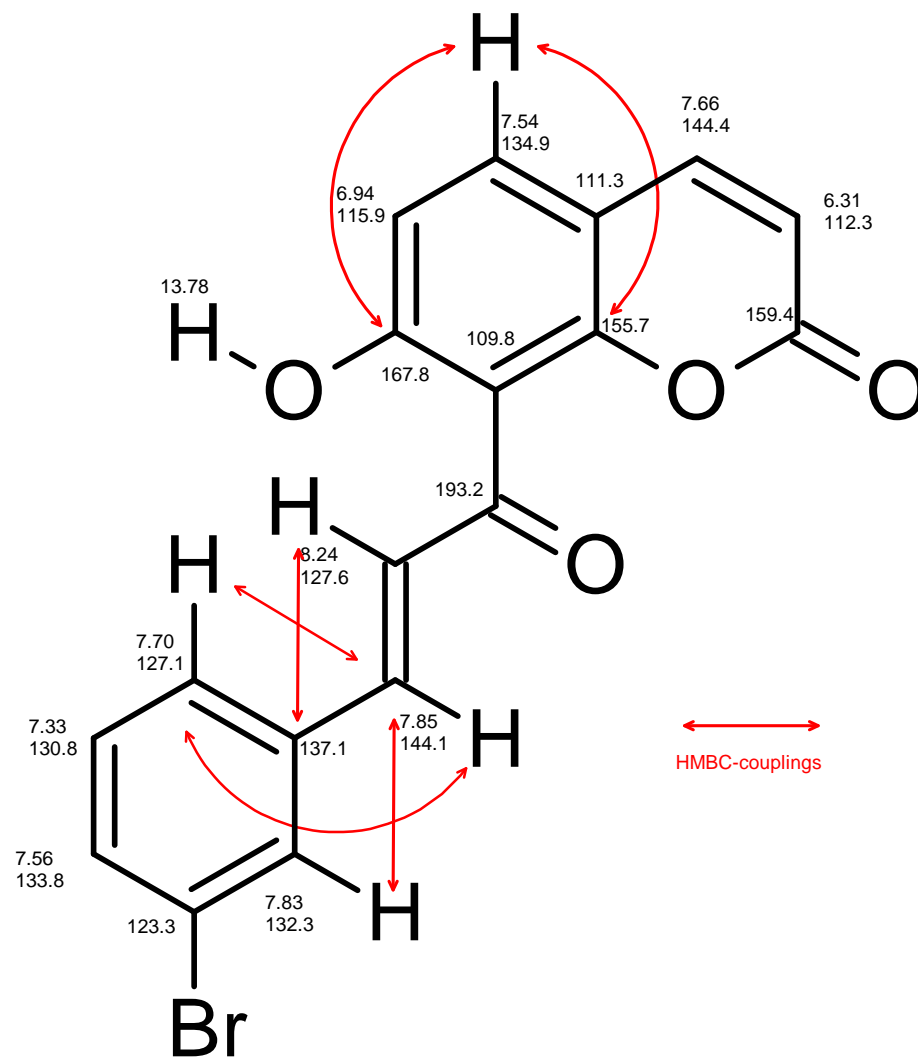



**Figure S126:**  $^1\text{H}$  NMR (400 MHz,  $\text{CDCl}_3$ ) of **14an**

NEO400\_2024-0116\_mak.40.fid

709s

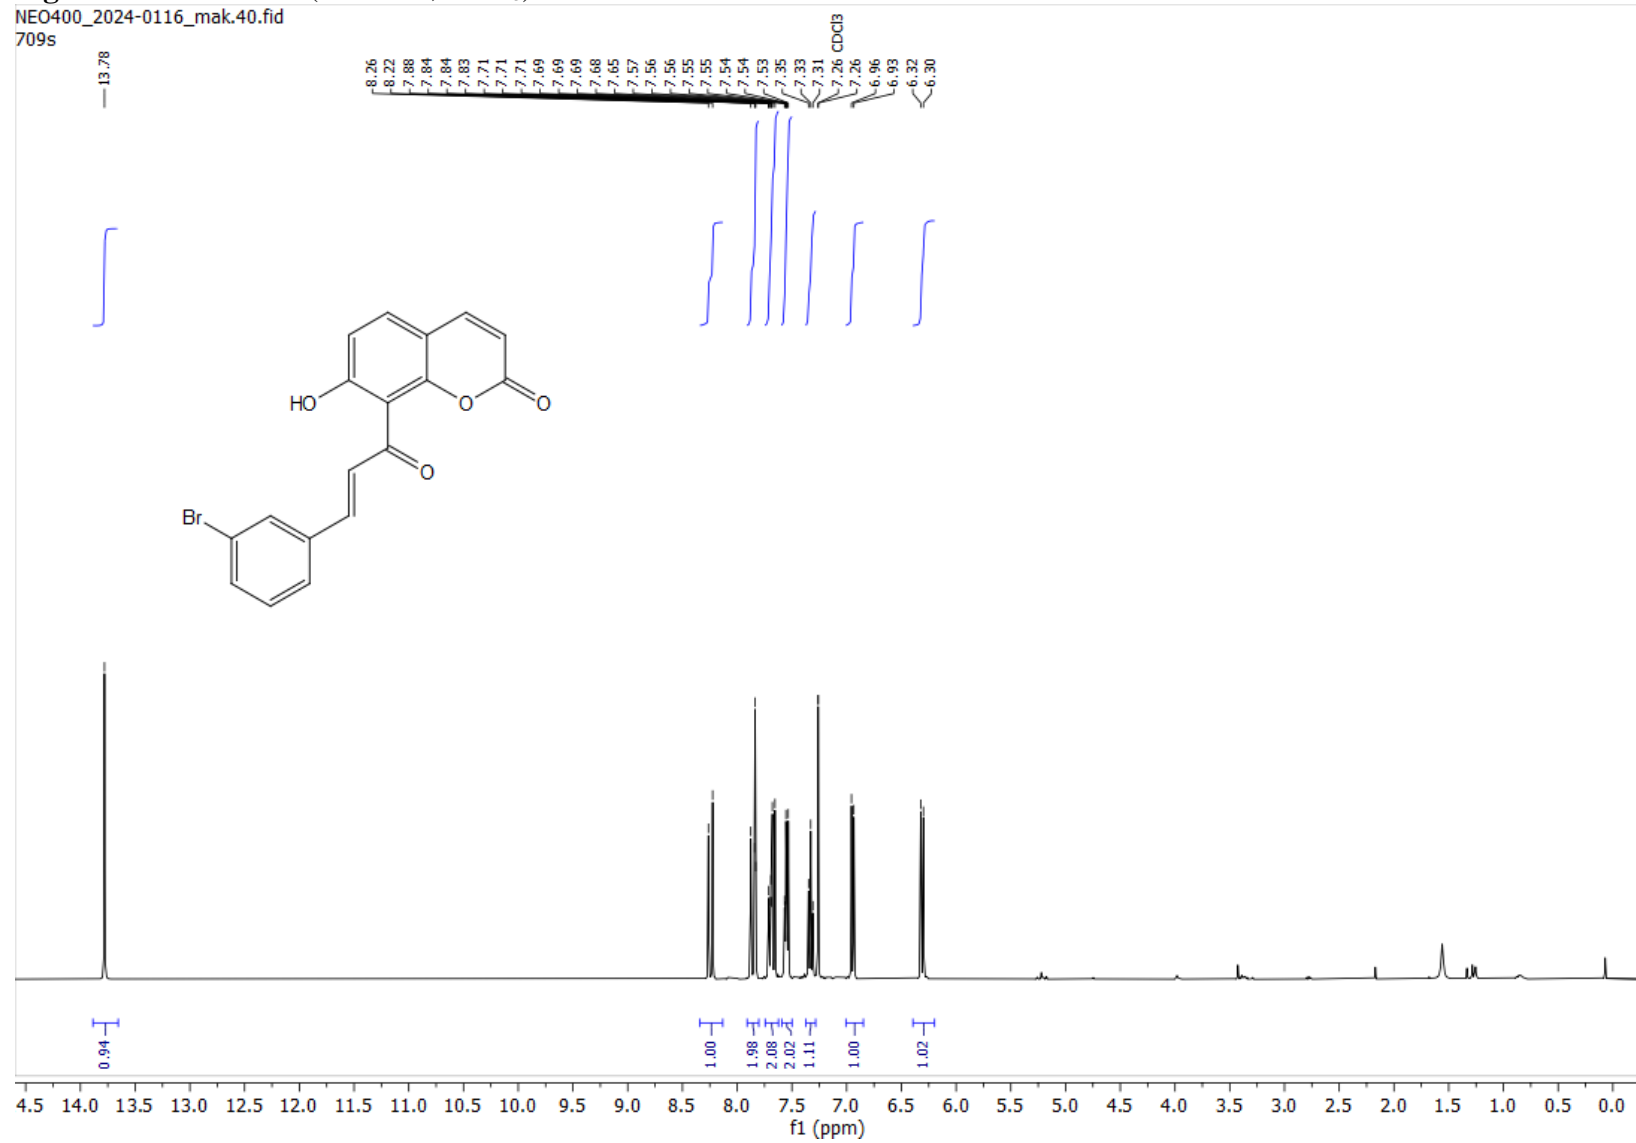

**Figure S127:**  $^{13}\text{C}\{^1\text{H}\}$  NMR (100 MHz,  $\text{CDCl}_3$ ) of **14an**

NEO400\_2024-0116\_mak.41.fid

709s

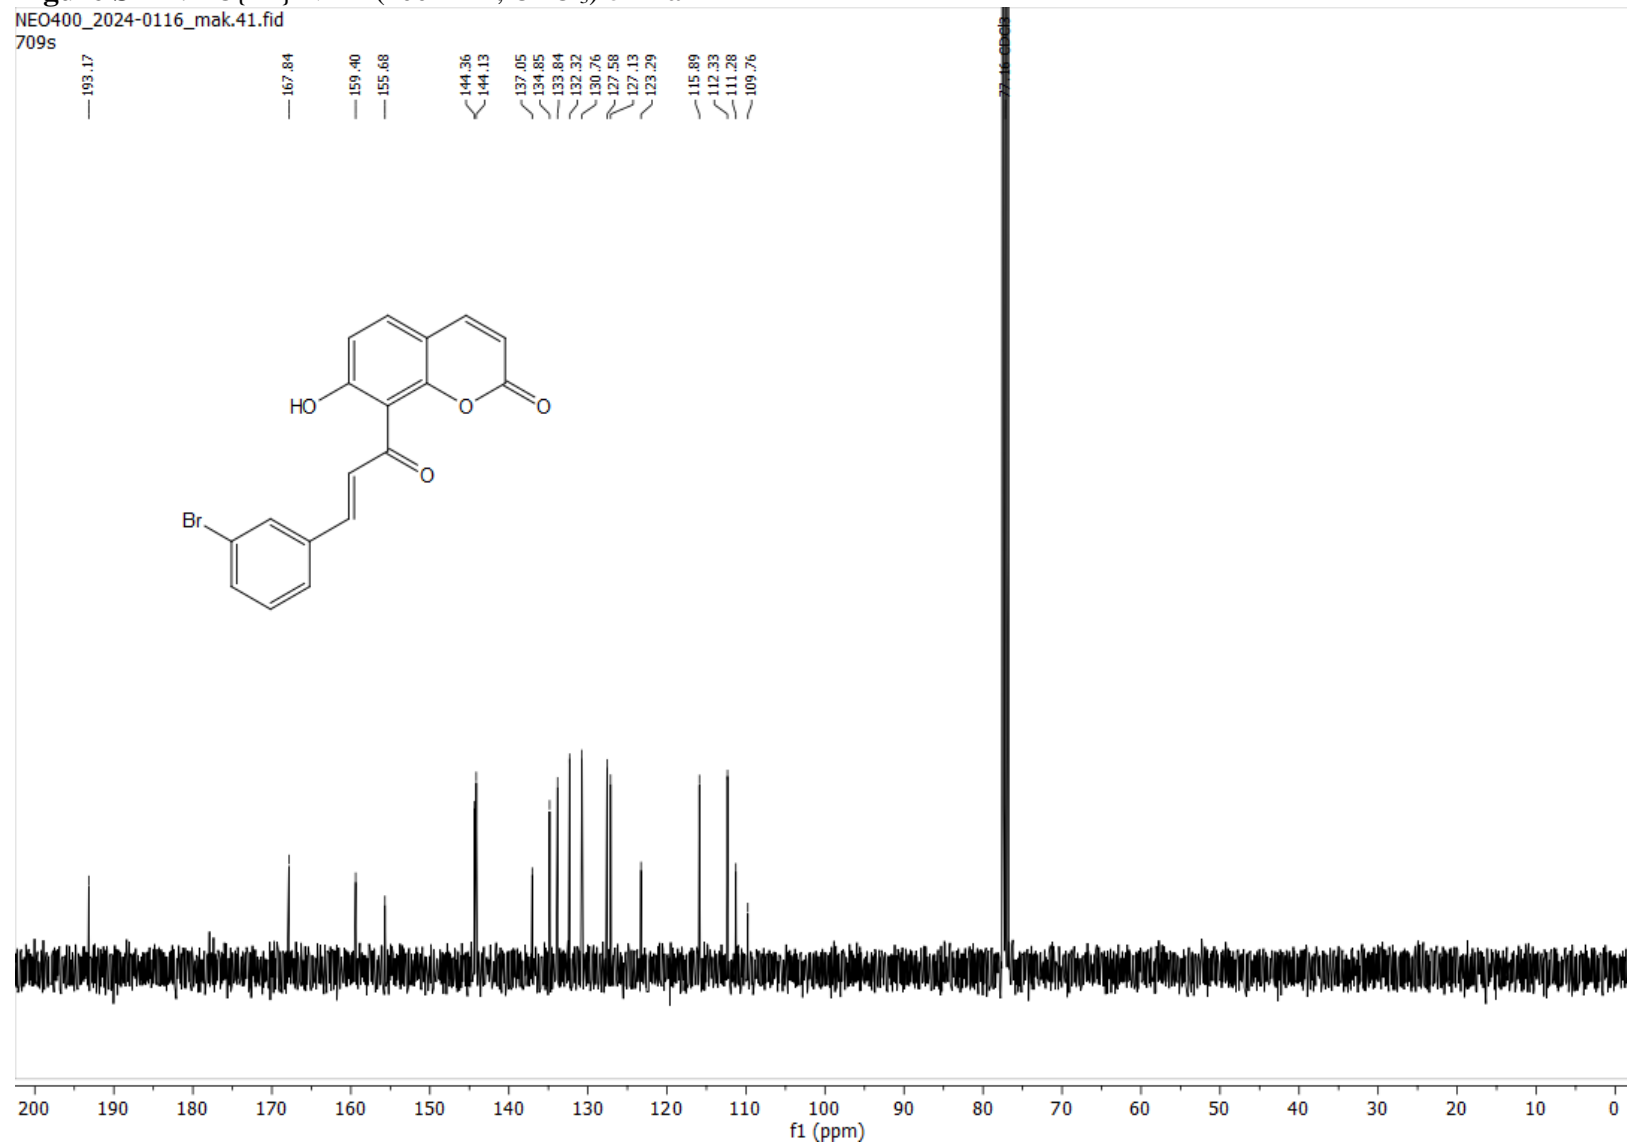

Figure S128: HSQC (400/100 MHz, CDCl<sub>3</sub>) of **14an**

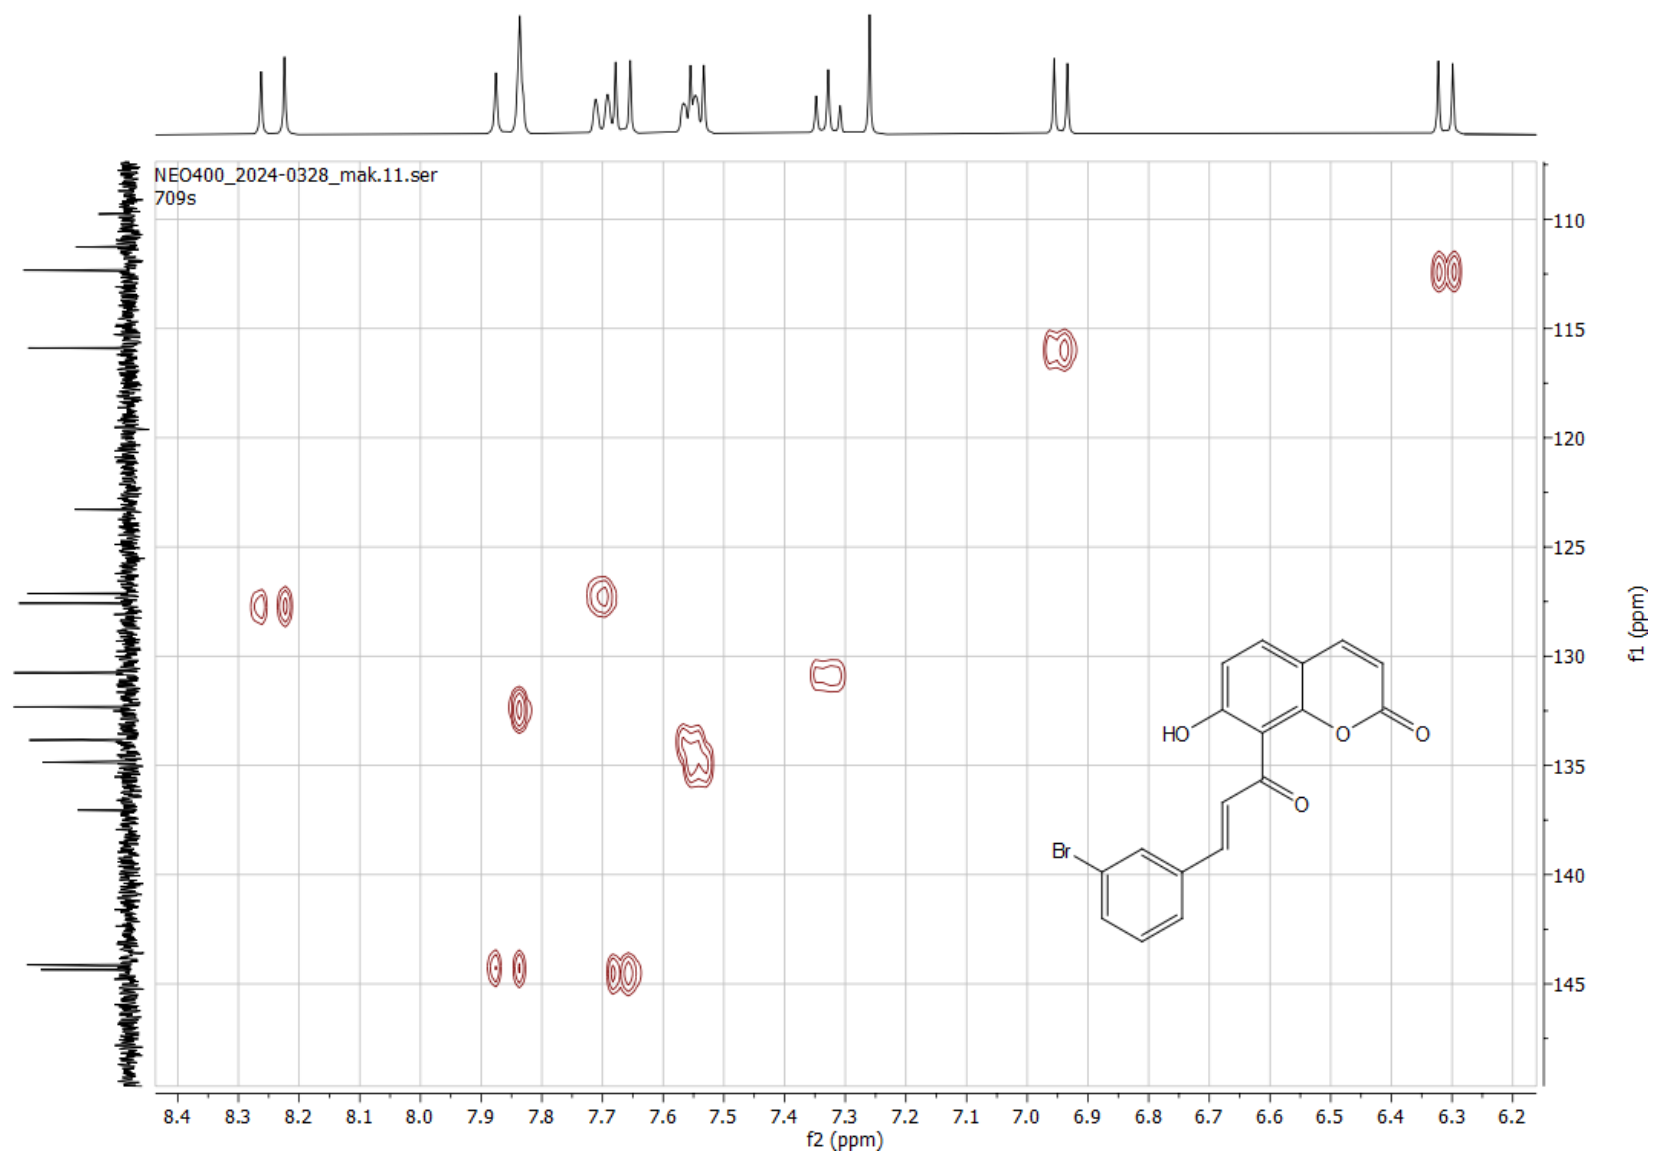

Figure S129: HMBC (400/100 MHz, CDCl<sub>3</sub>) of **14an**

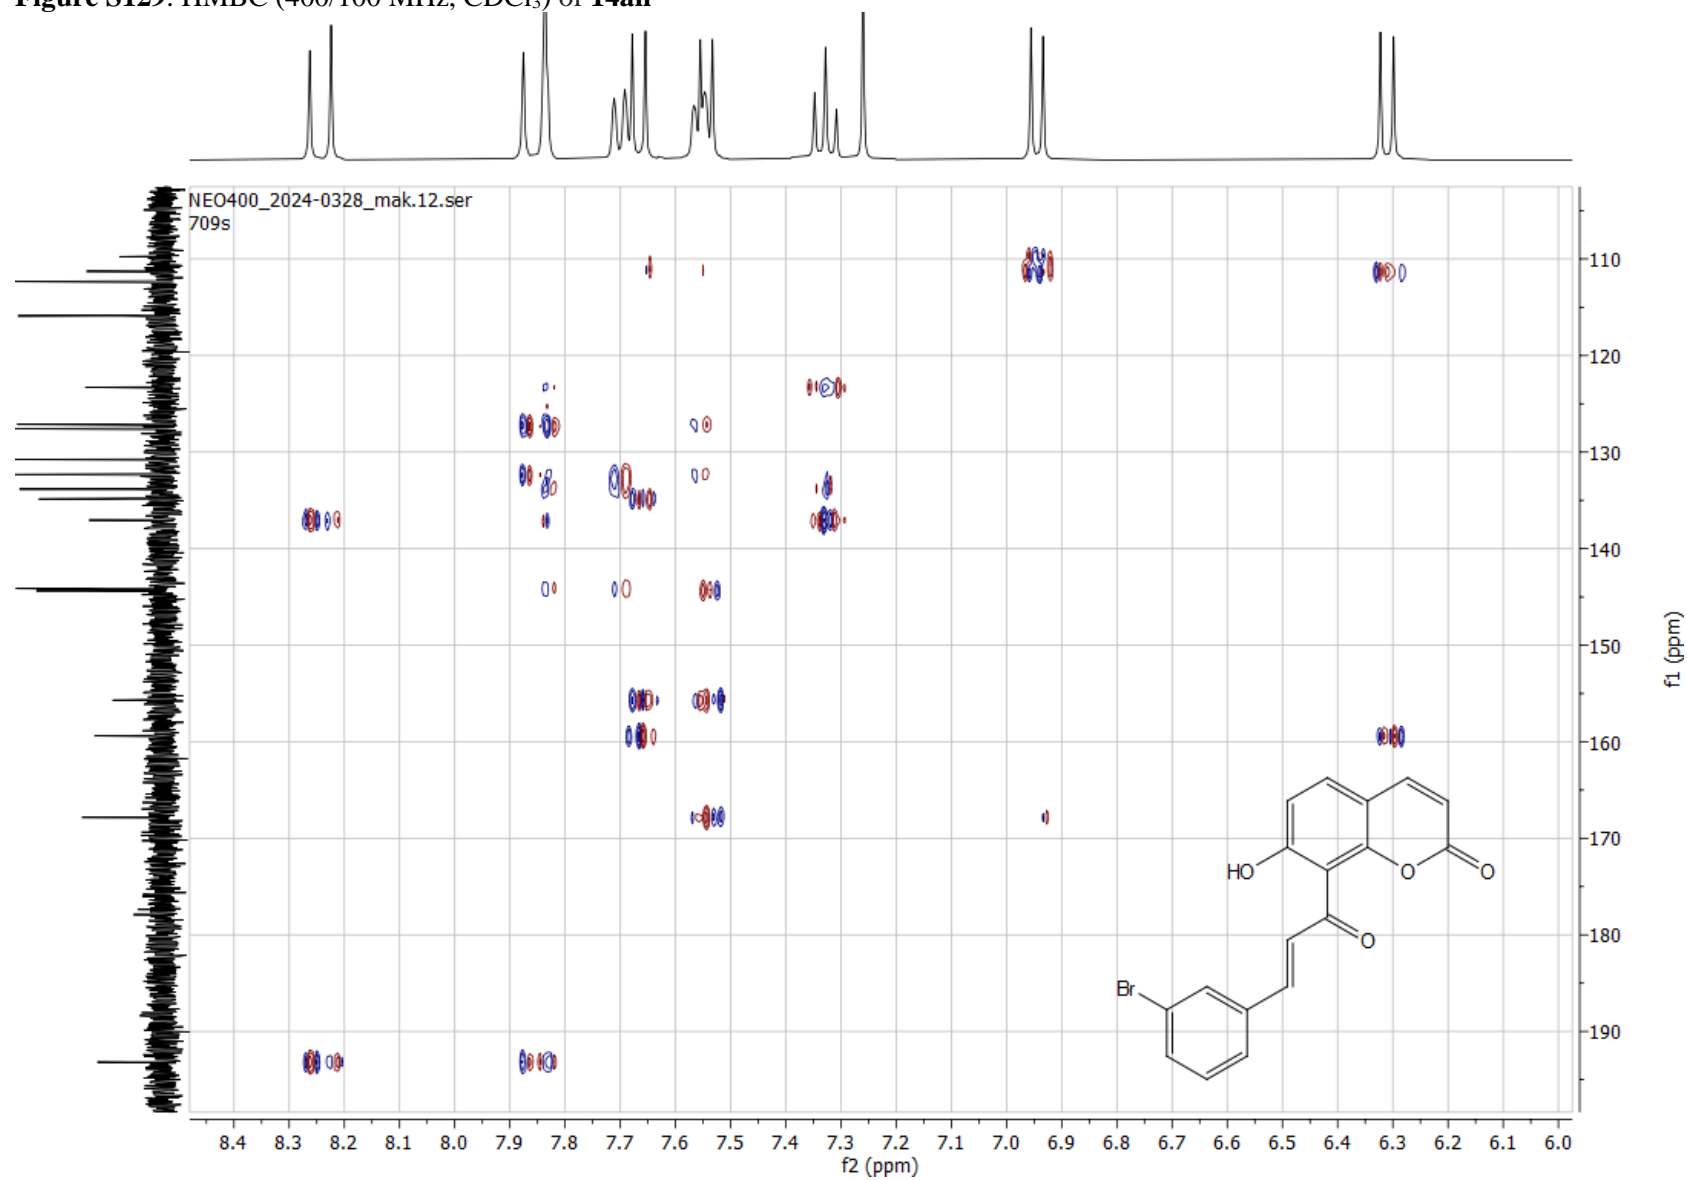

**Figure S130:**  $^1\text{H}$  NMR (400 MHz,  $\text{CDCl}_3$ ) of **13ap**

13ap/13ap-H  
498

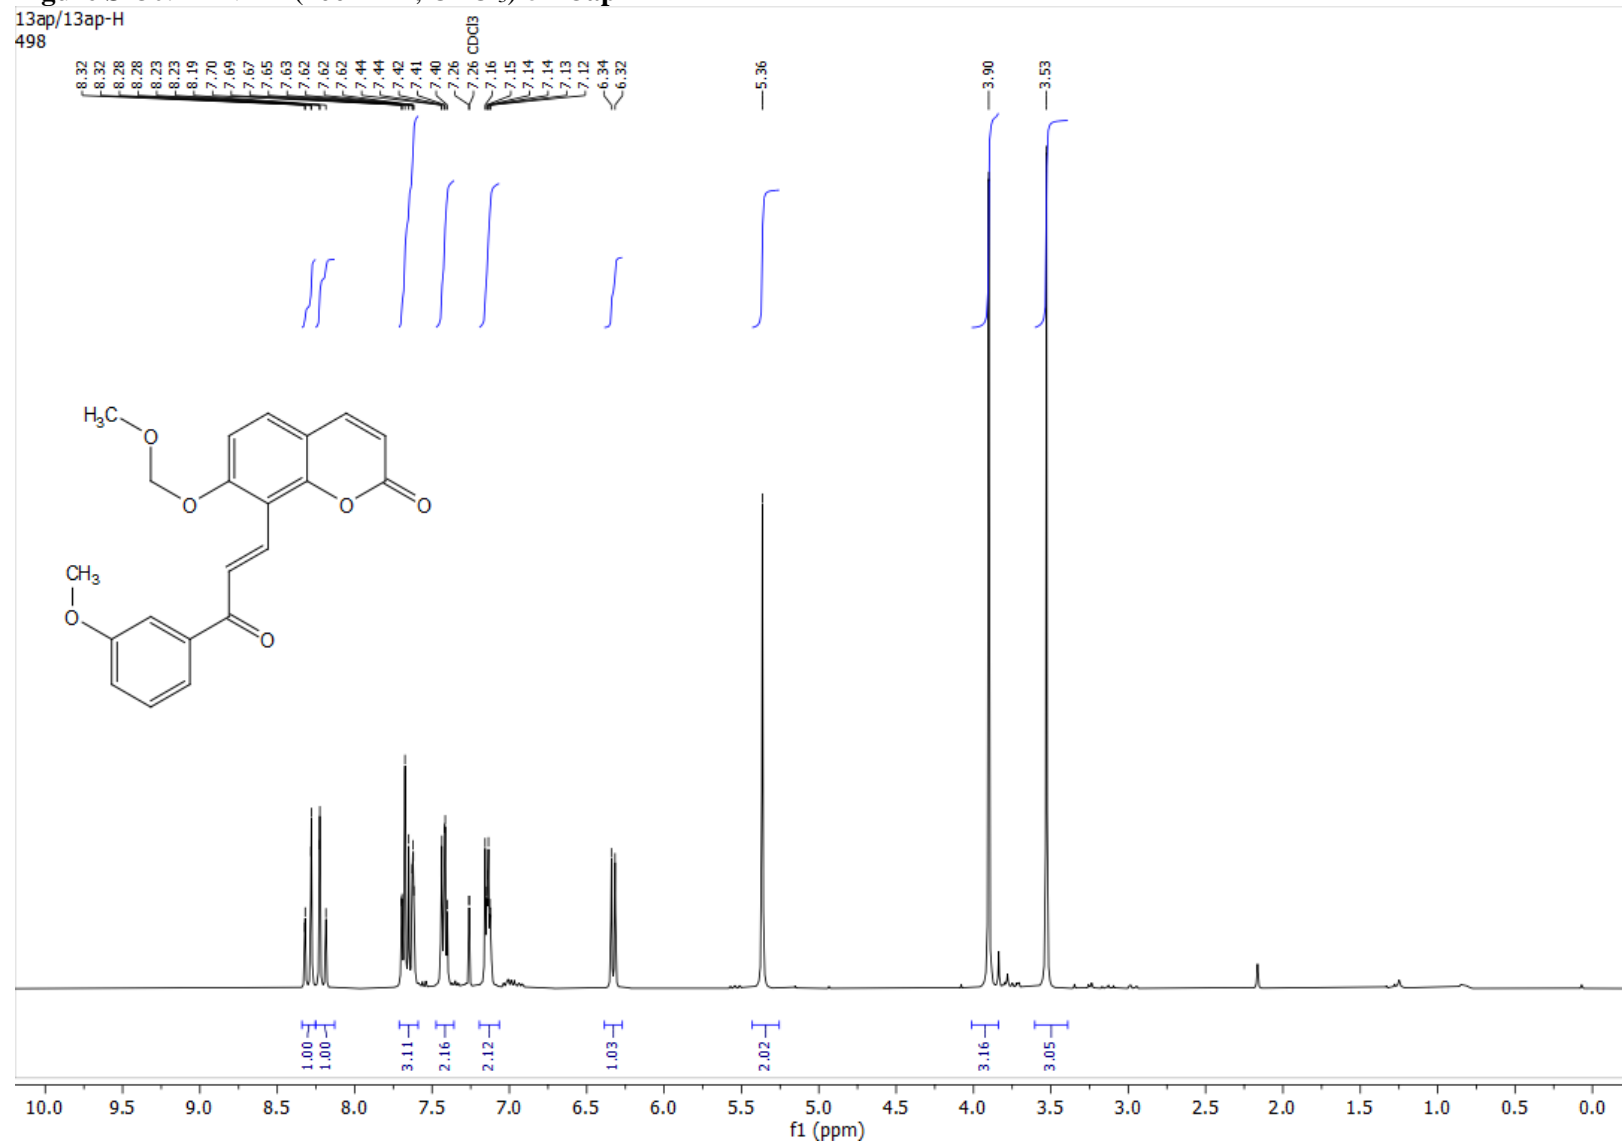

**Figure S131:**  $^{13}\text{C}\{^1\text{H}\}$  NMR (100 MHz,  $\text{CDCl}_3$ ) of **13ap**

13ap/13ap-C  
498

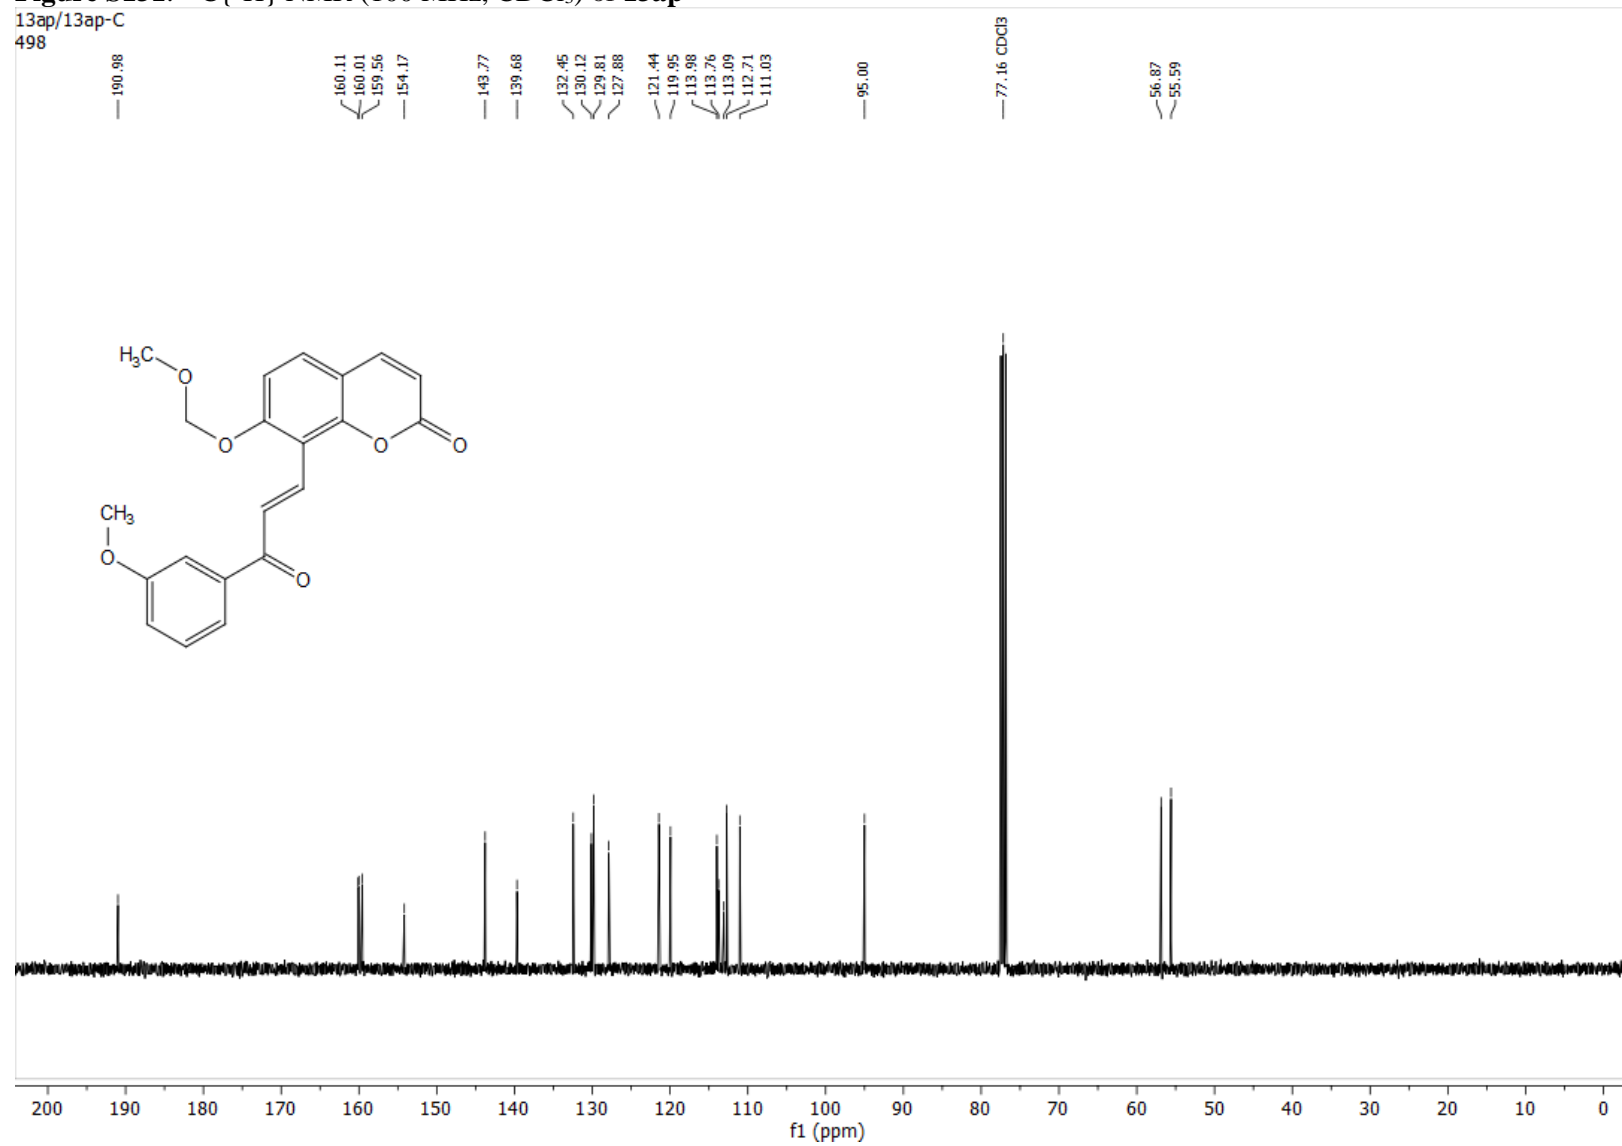

**Figure S132:**  $^1\text{H}$  NMR (400 MHz,  $\text{CDCl}_3$ ) of **13aq**

NEO400\_2023-1117\_mak.70.fid  
698s

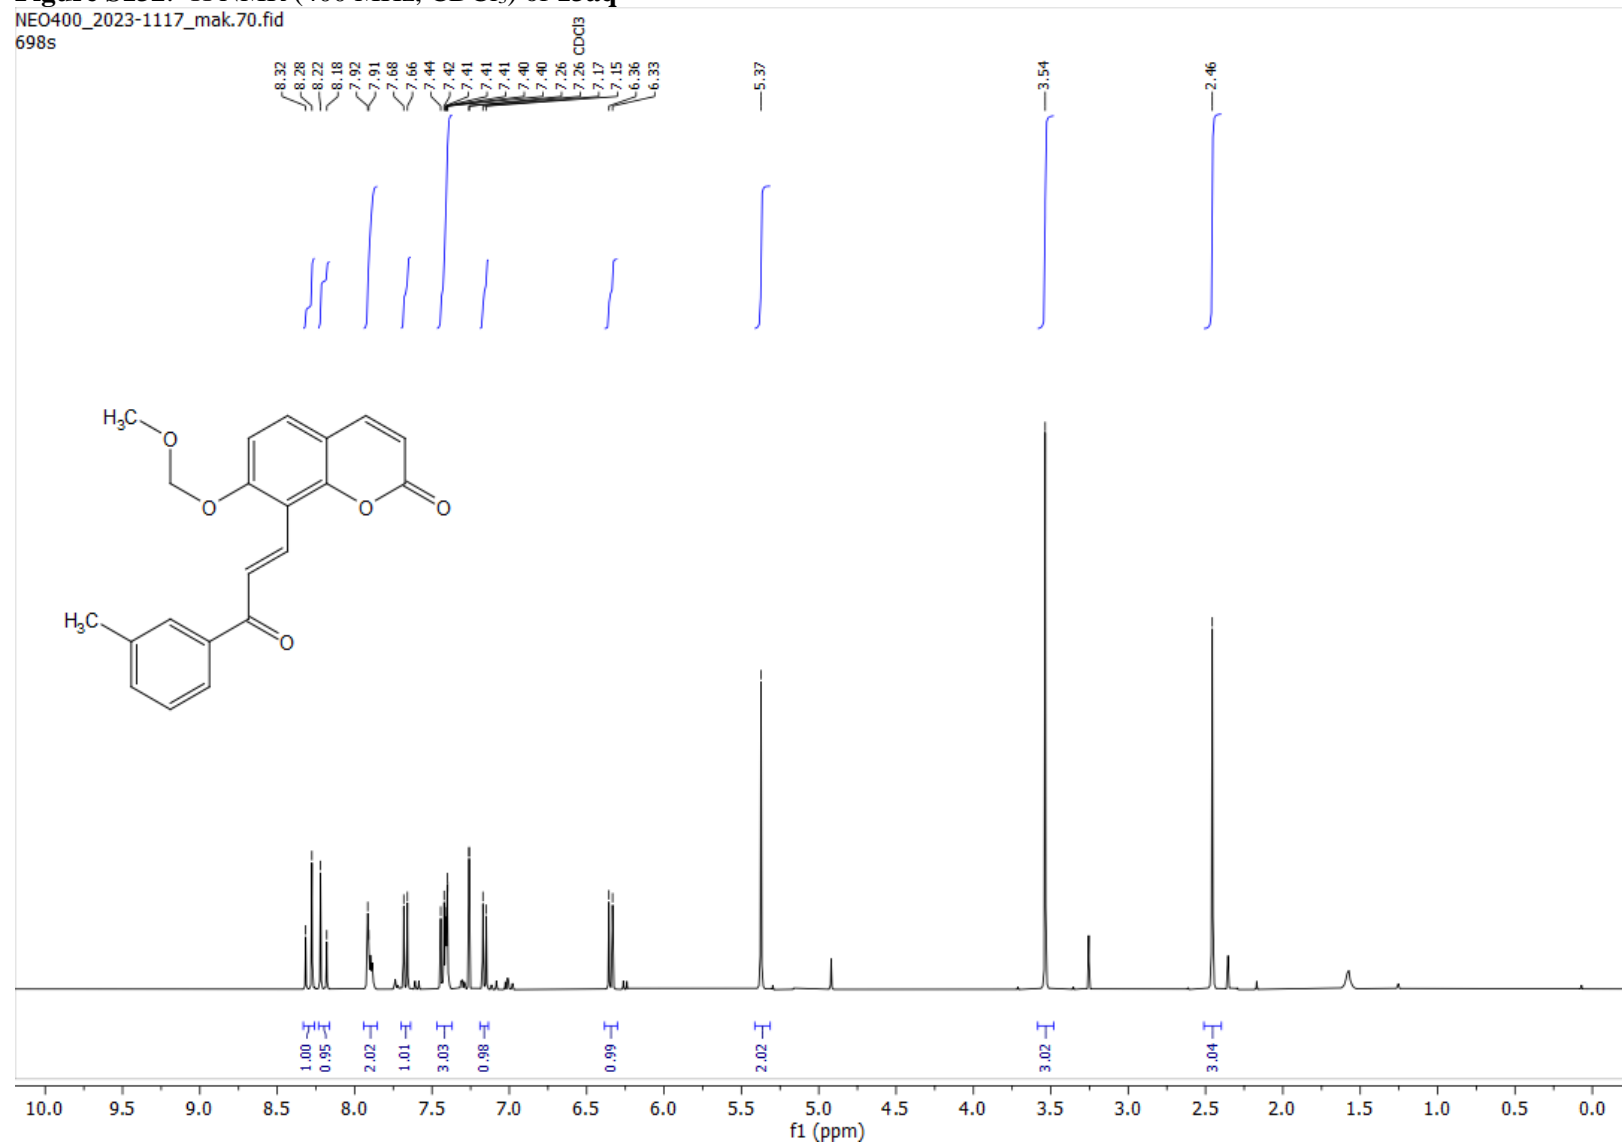

**Figure S133:**  $^{13}\text{C}\{^1\text{H}\}$  NMR (100 MHz,  $\text{CDCl}_3$ ) of **13aq**

NEO400\_2023-1117\_mak.71.fid

698s

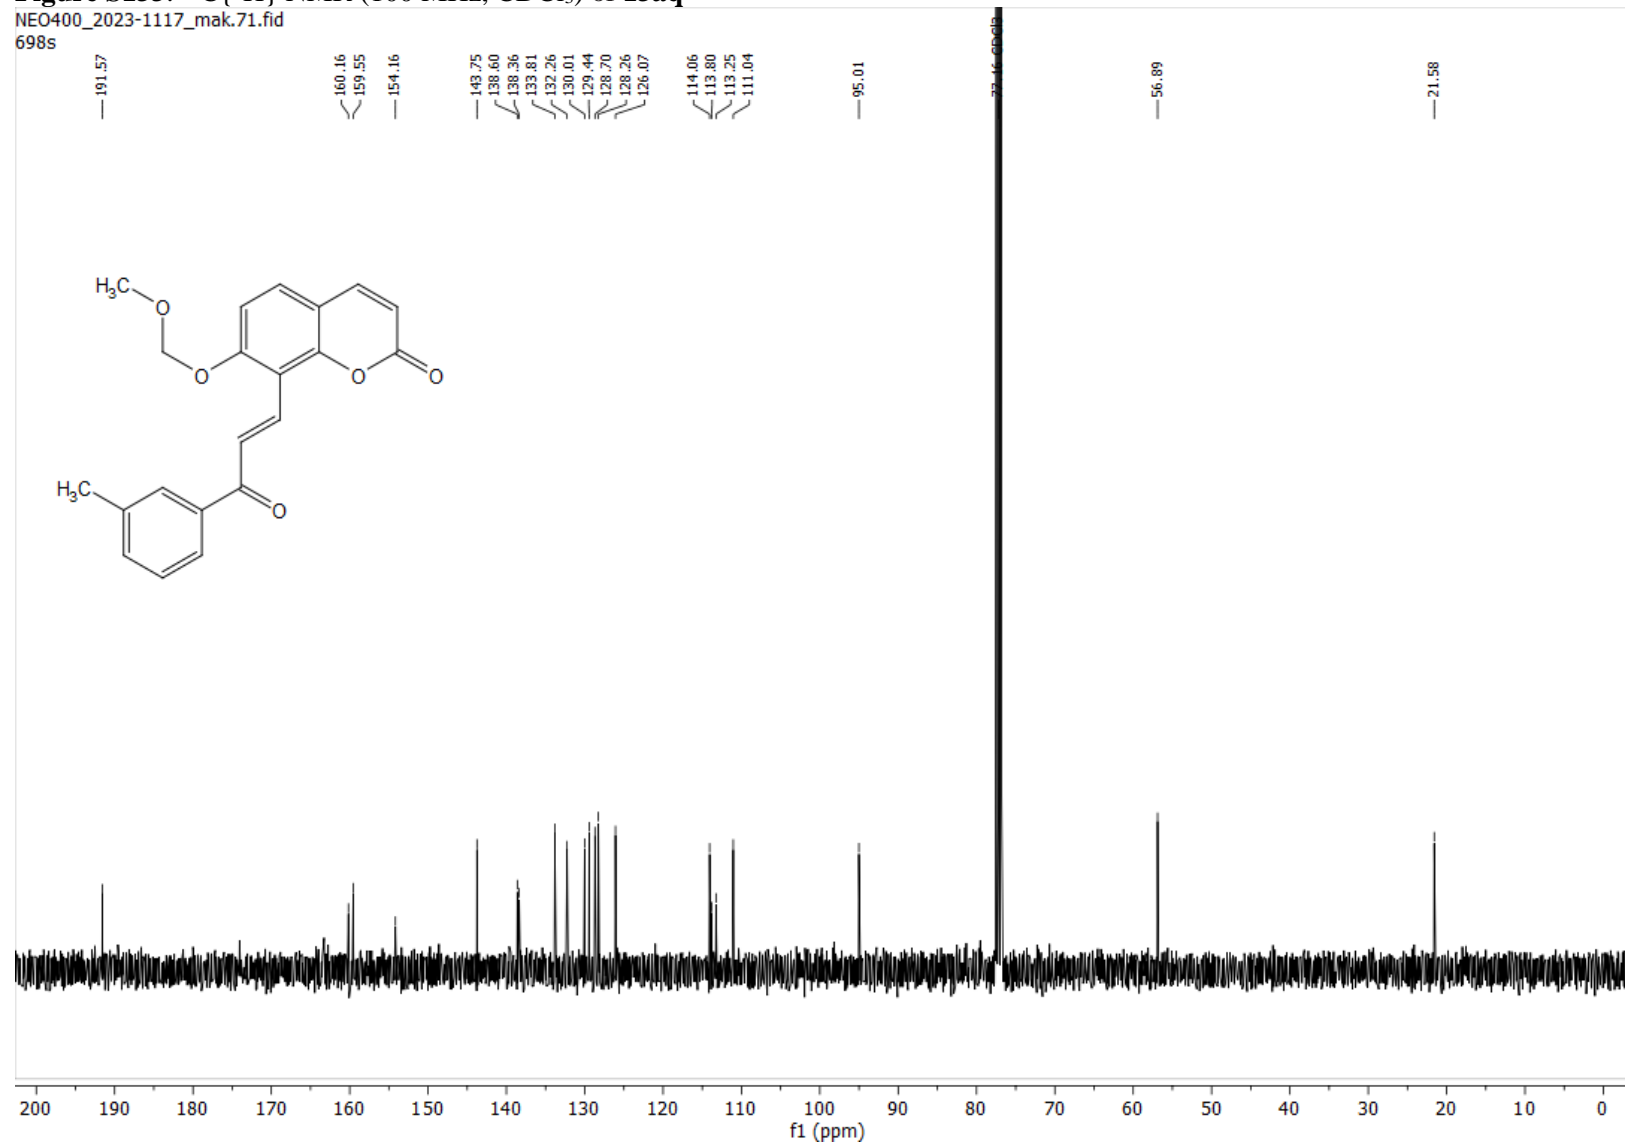



**Figure S134:** COSY (400 MHz, CDCl<sub>3</sub>) of **13aq**

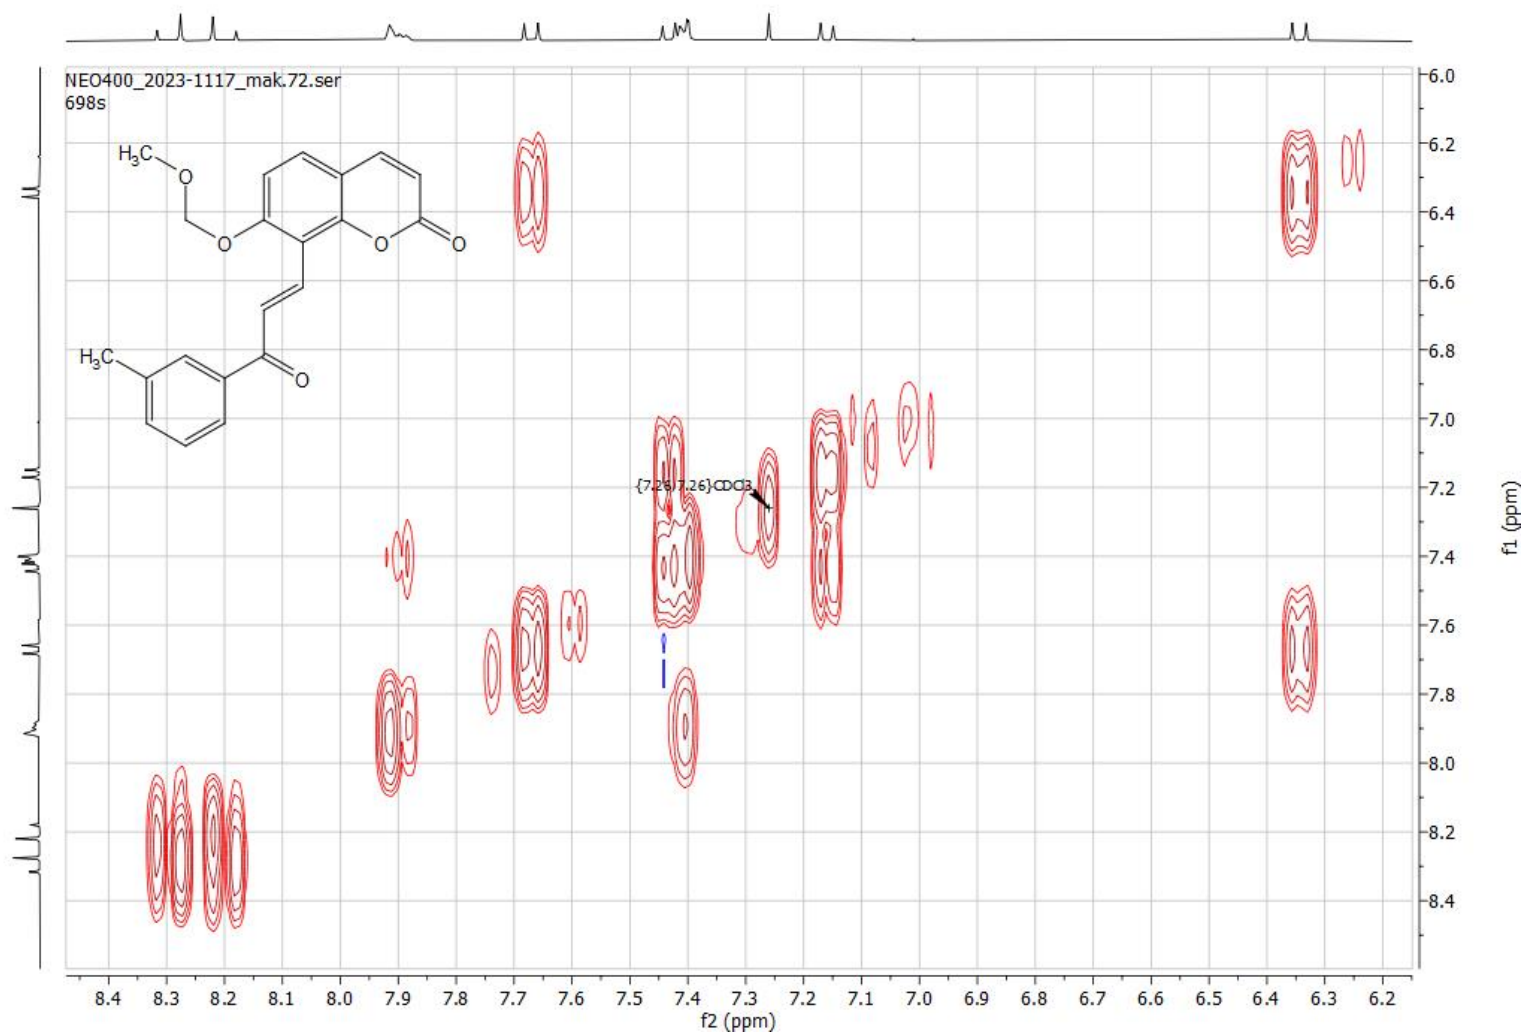

Figure S135: HSQC (400/100 MHz, CDCl<sub>3</sub>) of **13aq**

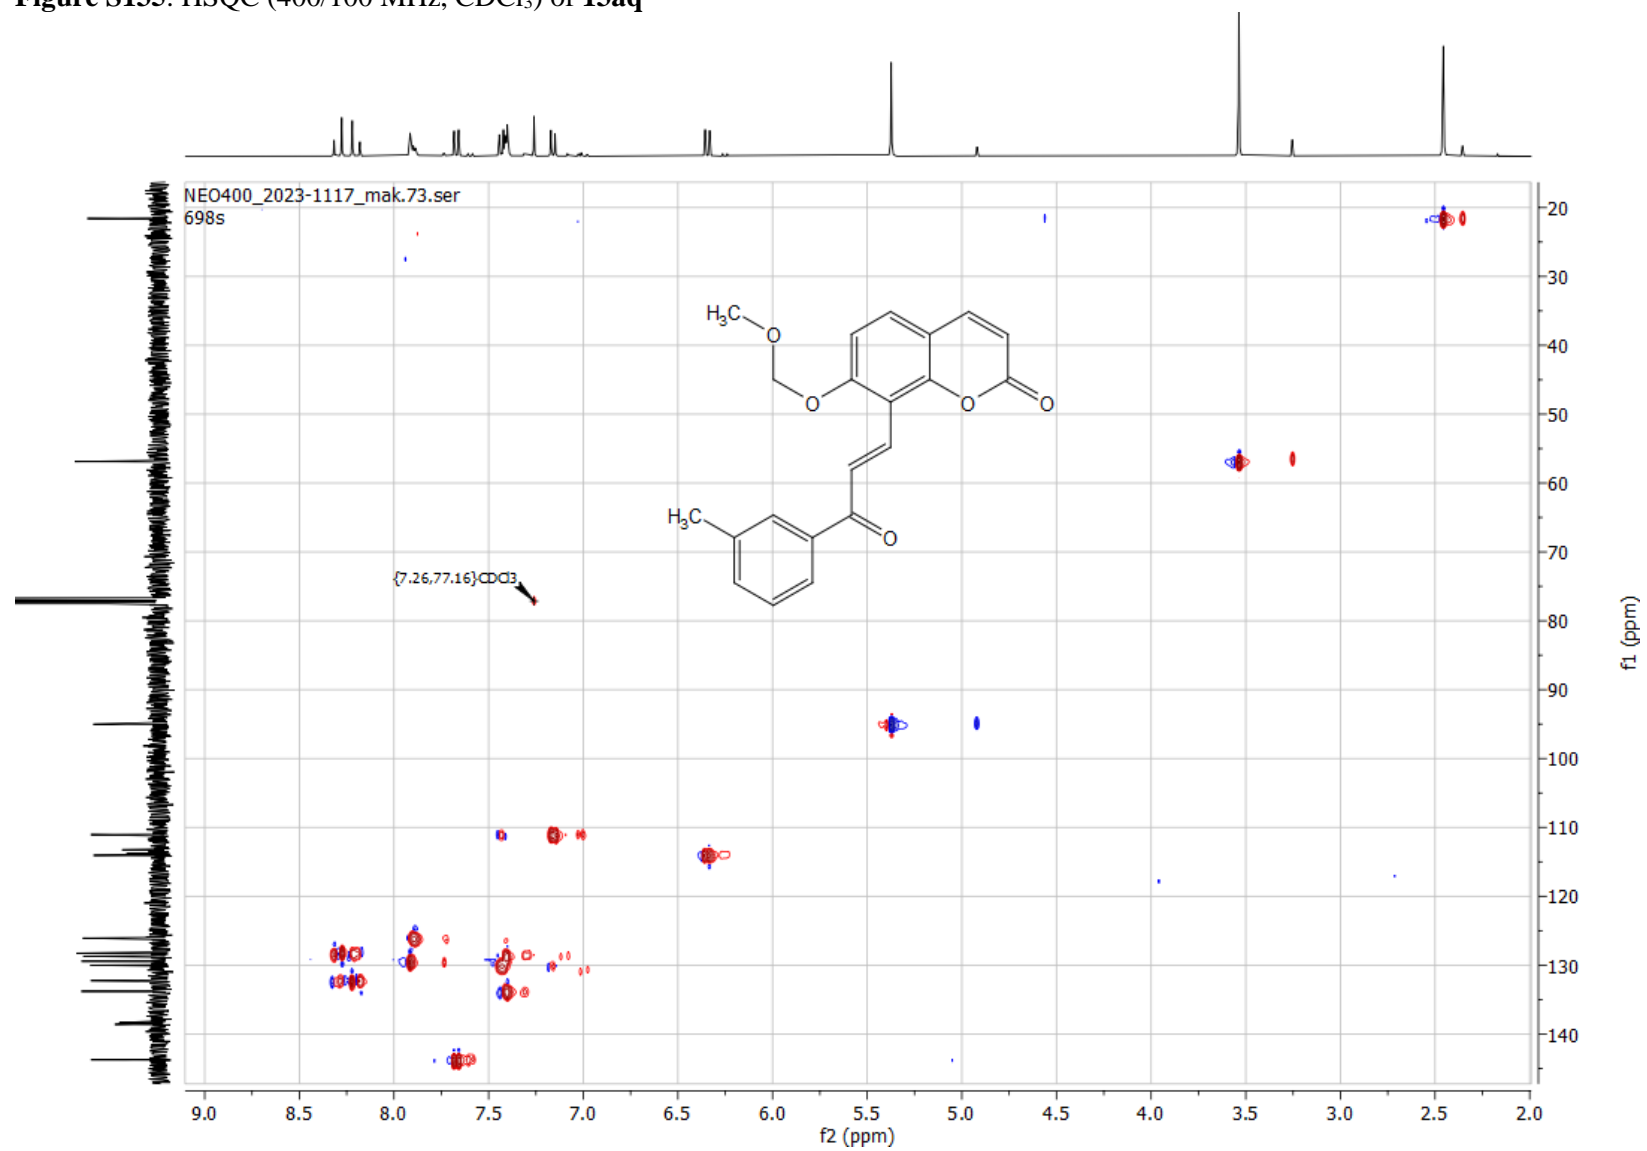

Figure S136: HMBC (400/100 MHz, CDCl<sub>3</sub>) of **13aq**

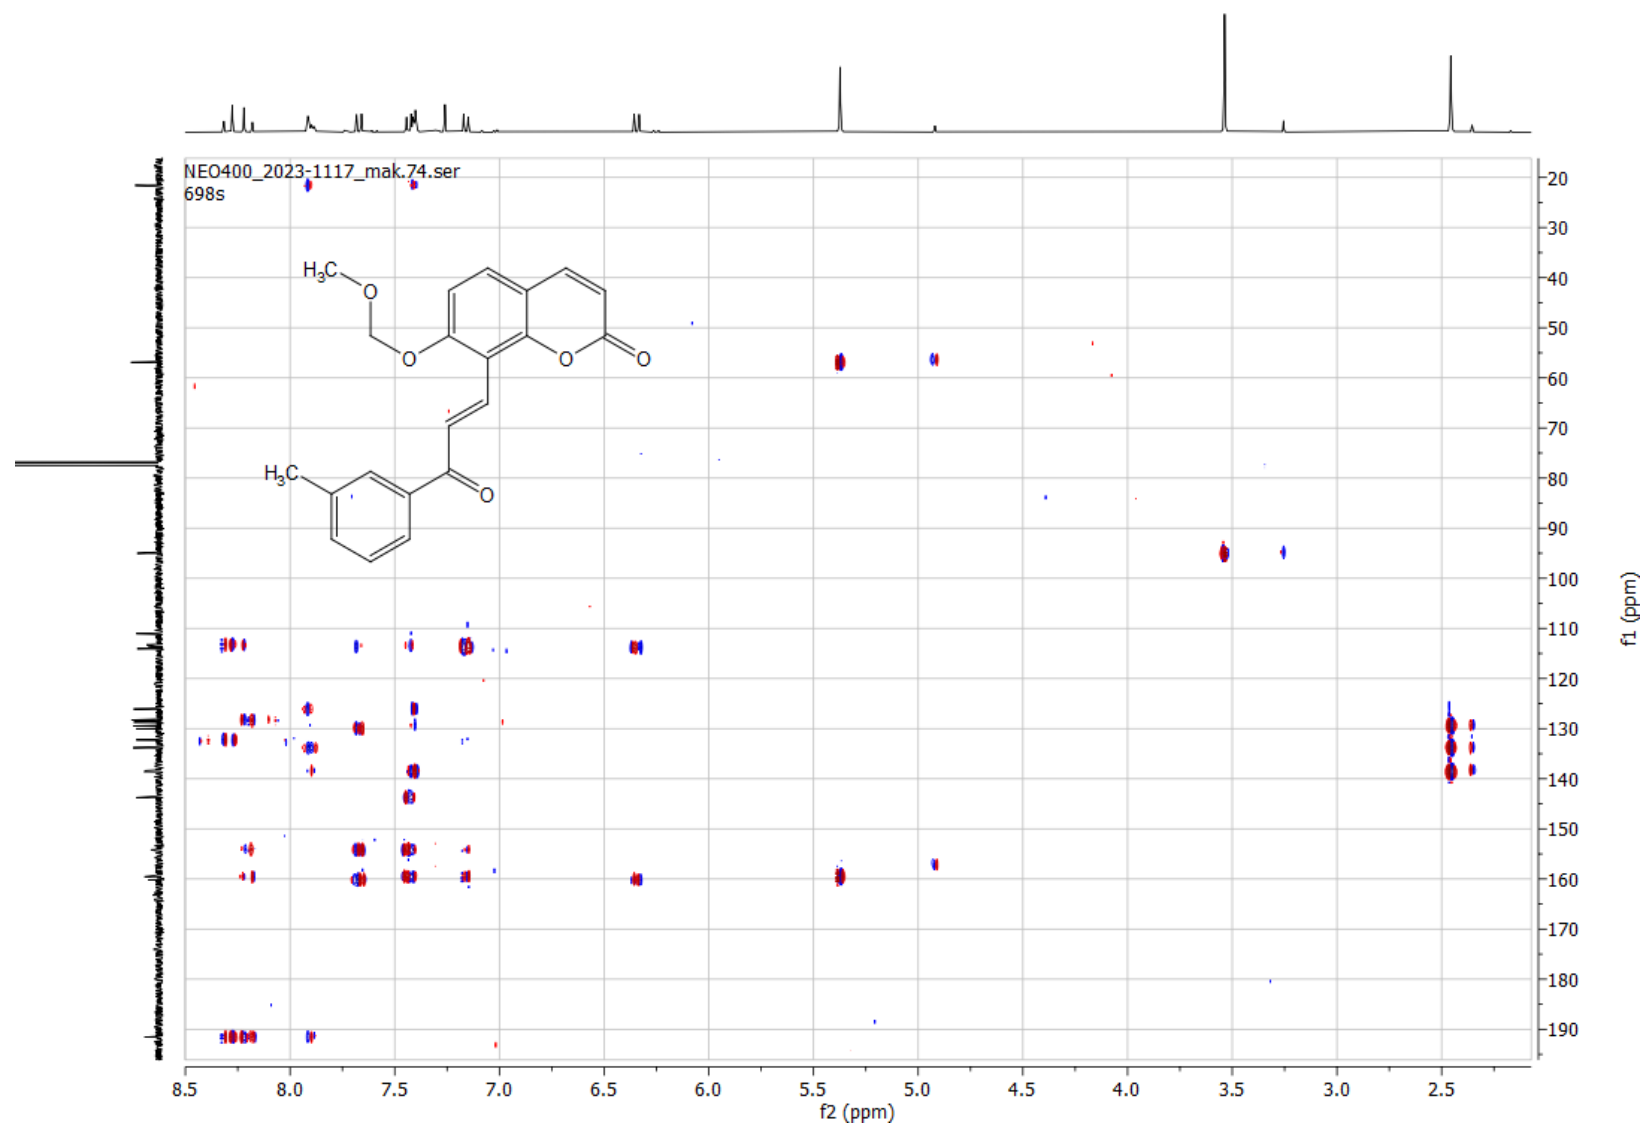

Figure S137: NOESY (400 MHz, CDCl<sub>3</sub>) of **13aq**

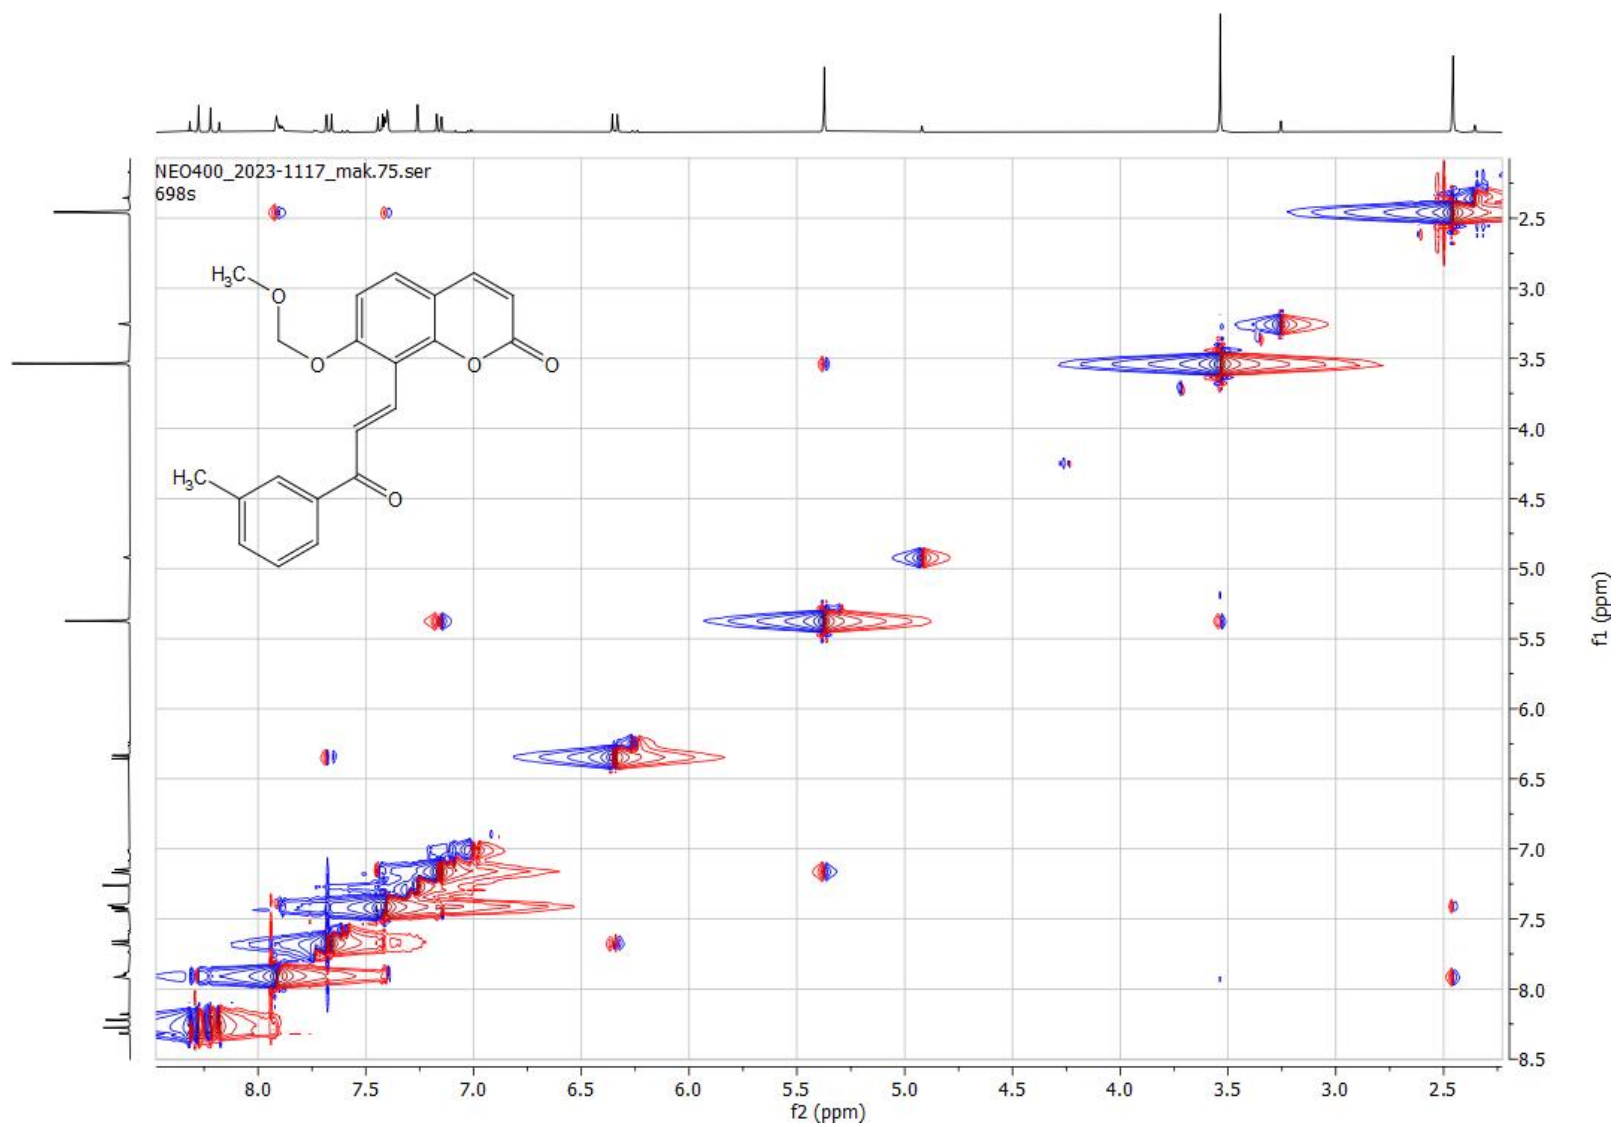

**Figure S138:** NMR-Signal assignment and selected HMBC-couplings for compound **14ar**

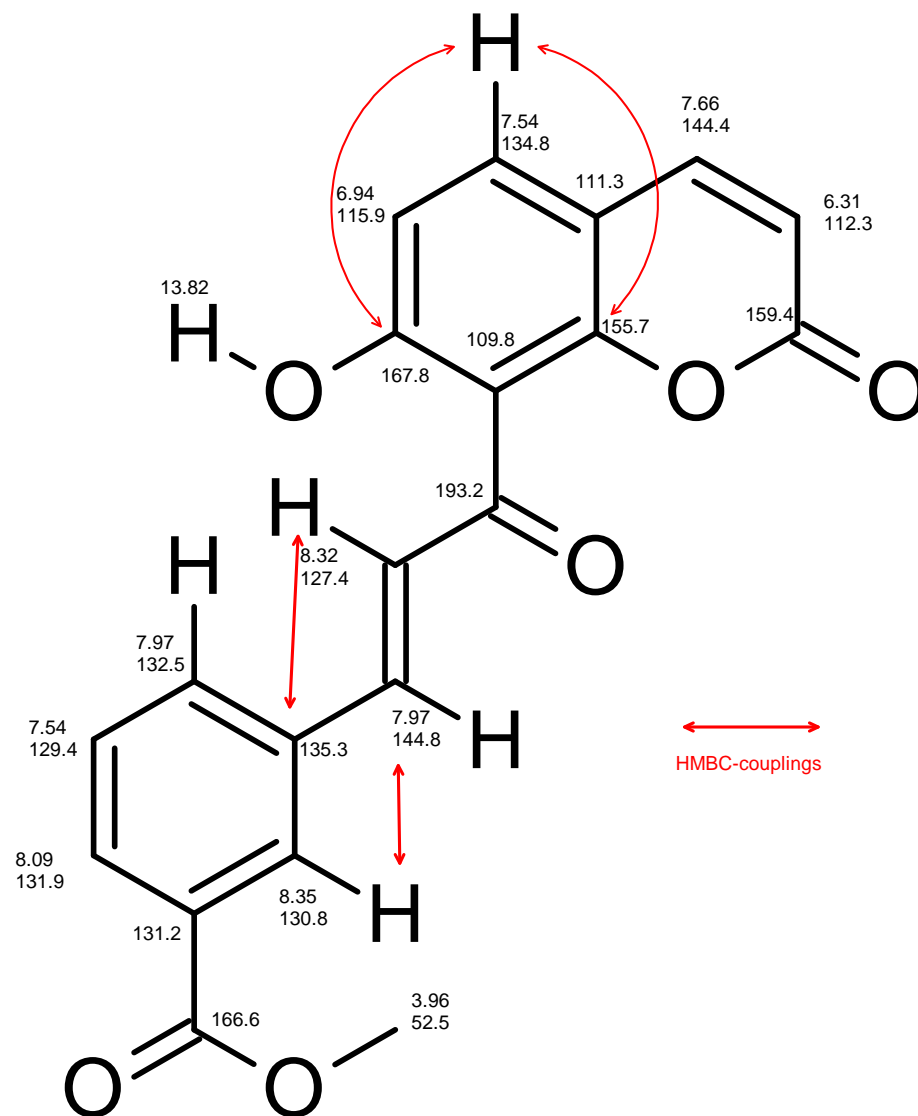

**Figure S139:**  $^1\text{H}$  NMR (400 MHz,  $\text{CDCl}_3$ ) of **14ar**

NEO400\_2023-1117\_mak.20.fid  
699s

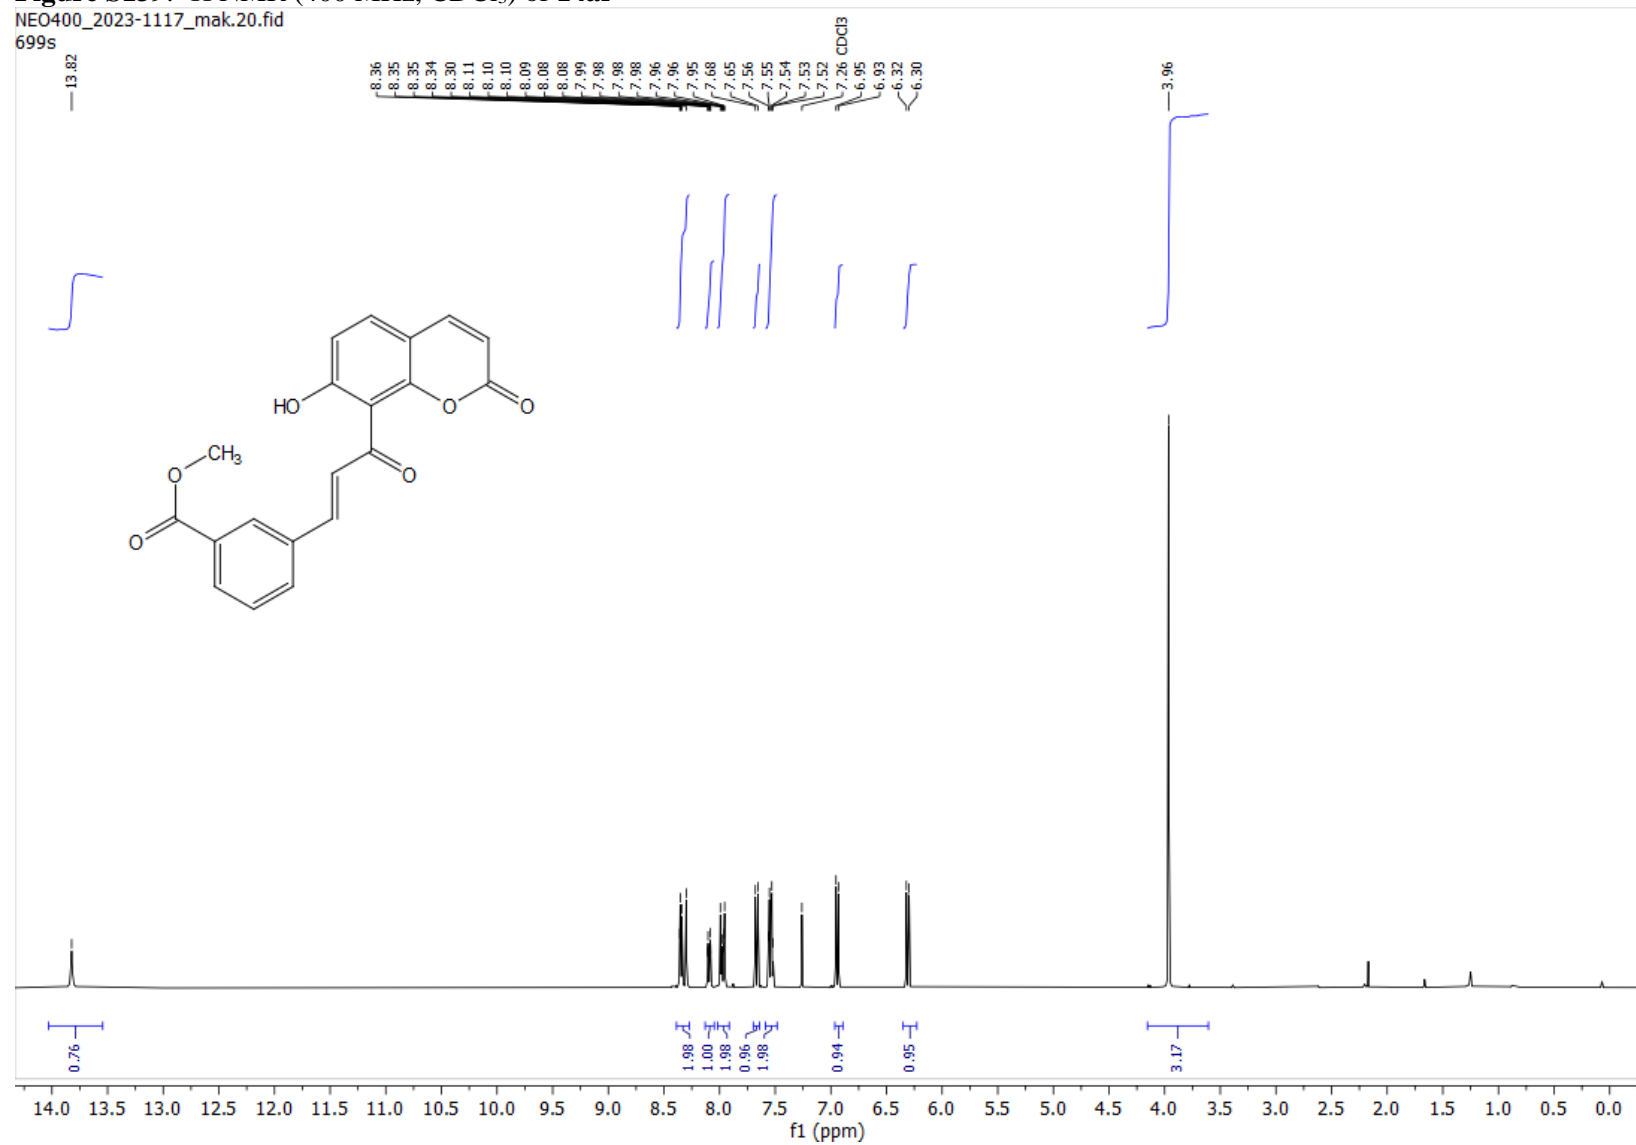

**Figure S140:**  $^{13}\text{C}\{^1\text{H}\}$  NMR (100 MHz,  $\text{CDCl}_3$ ) of **14ar**

NEO400\_2023-1117\_mak.21.fid

699s

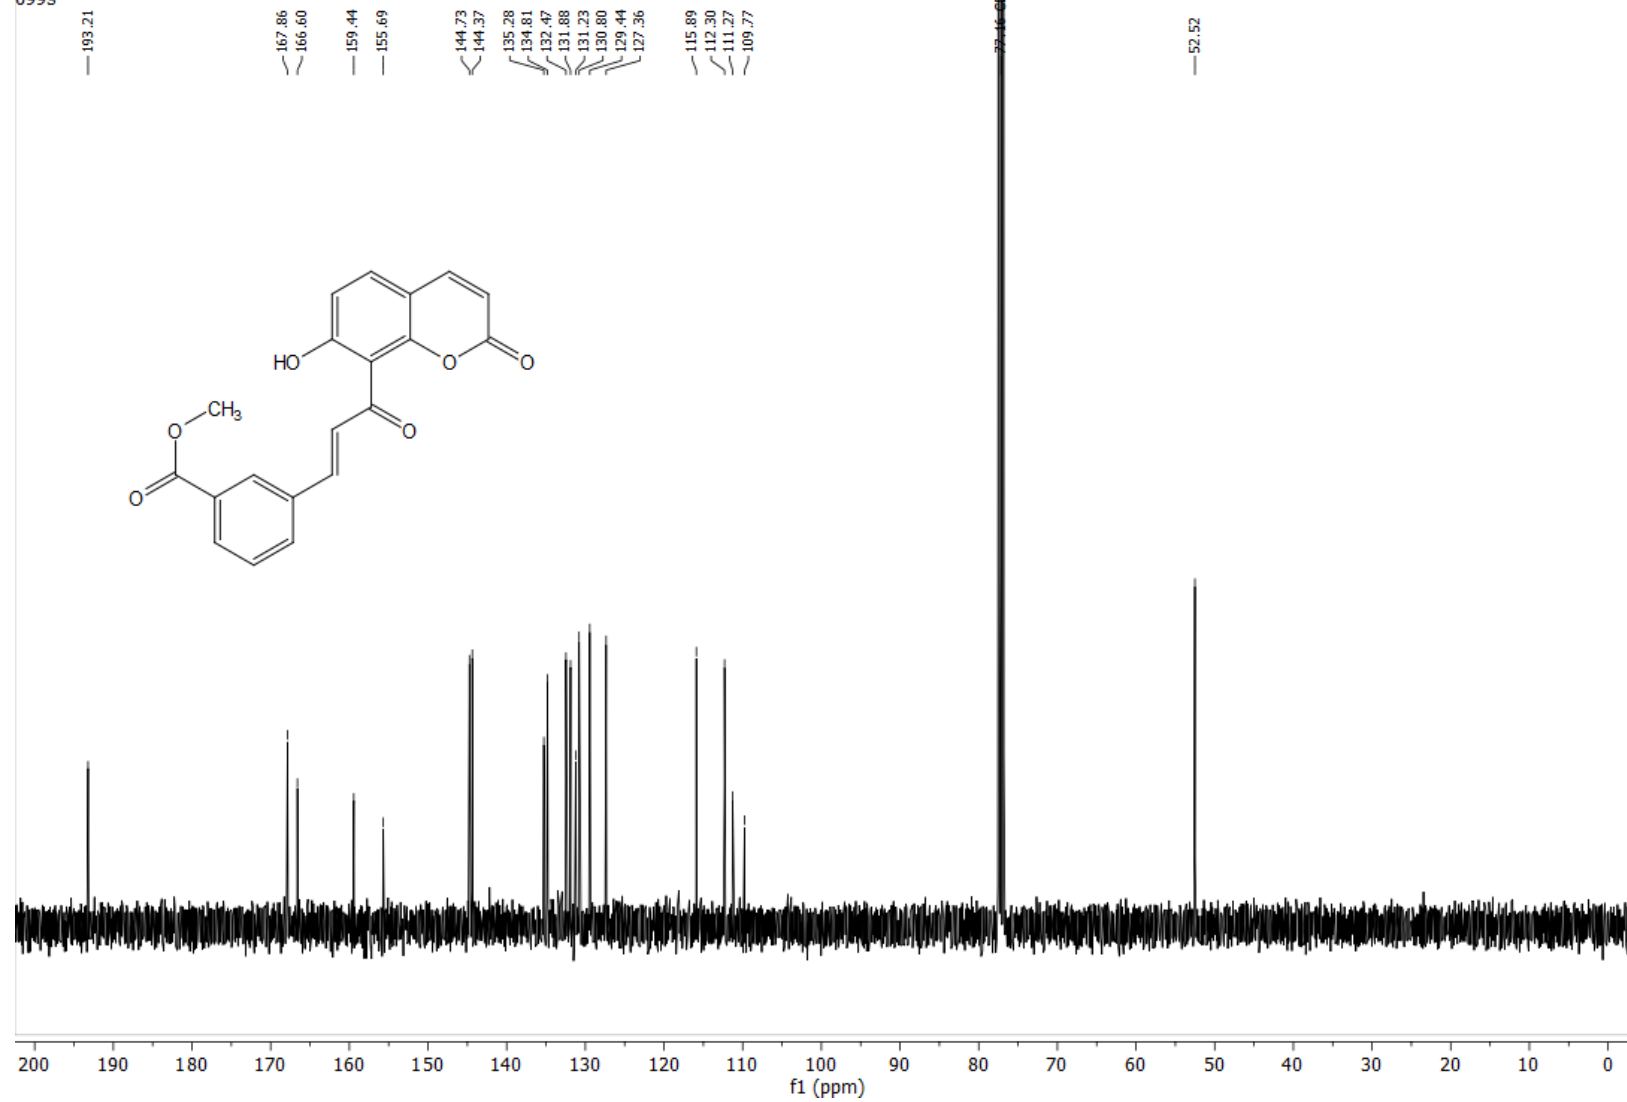

Figure S141: COSY (400 MHz, CDCl<sub>3</sub>) of 14ar

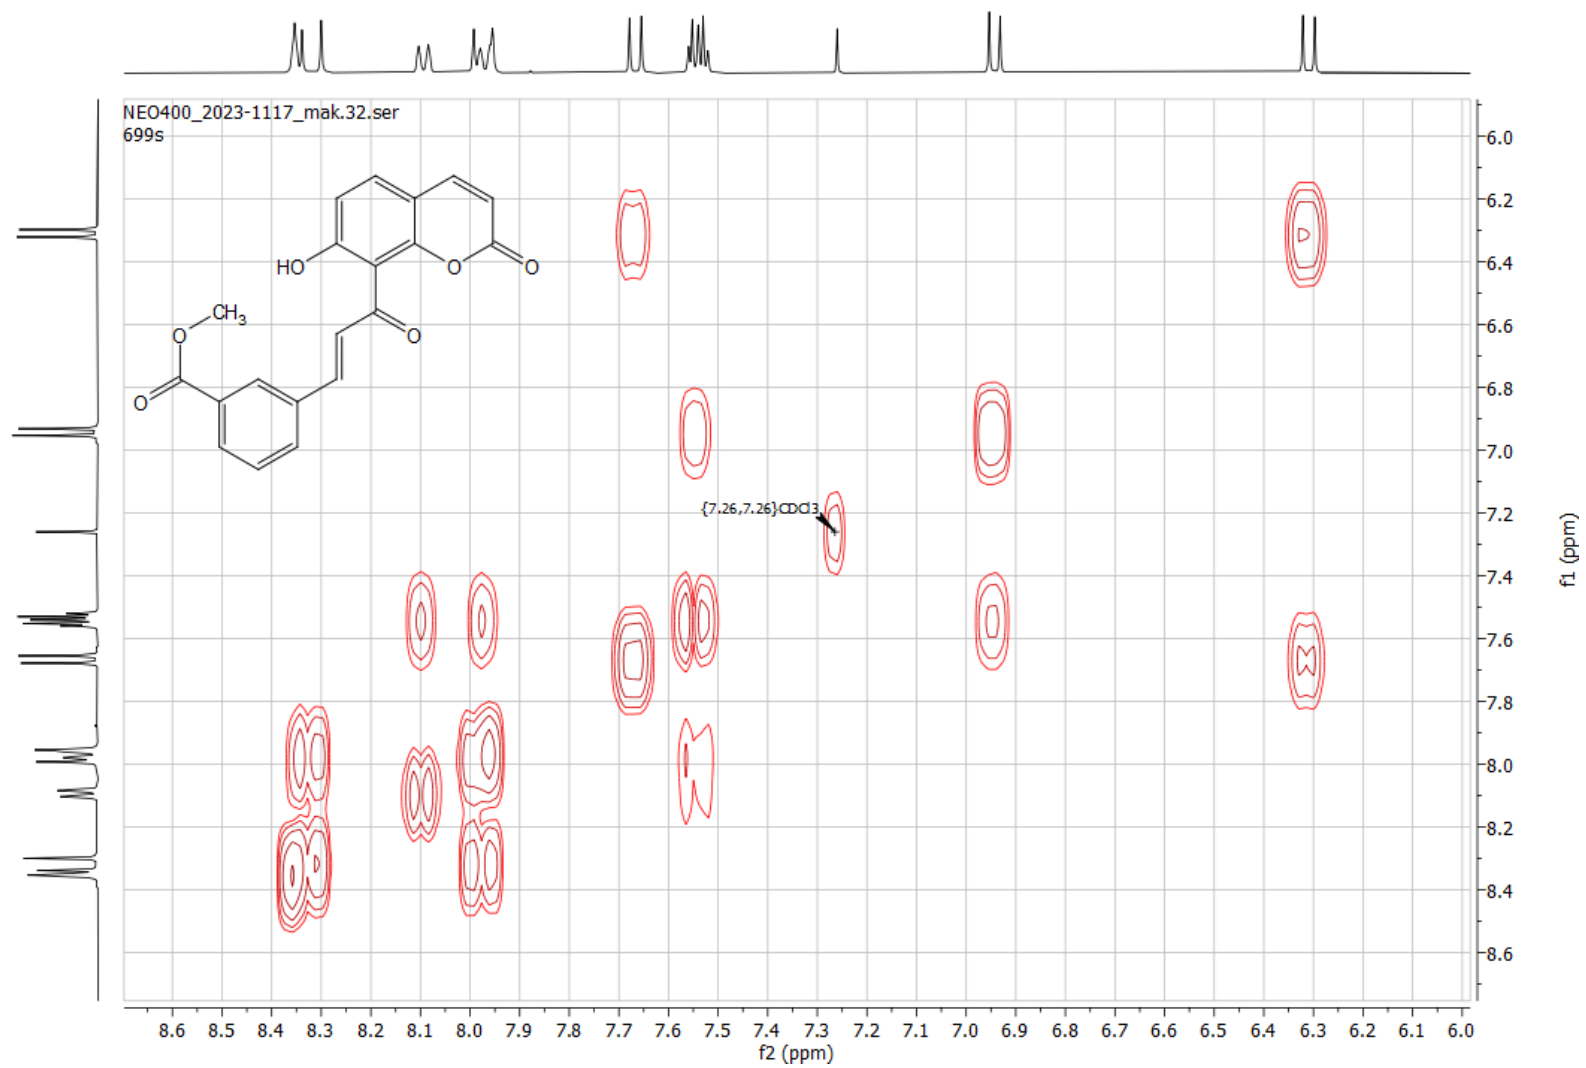



Figure S142: HSQC (400/100 MHz, CDCl<sub>3</sub>) of **14ar**

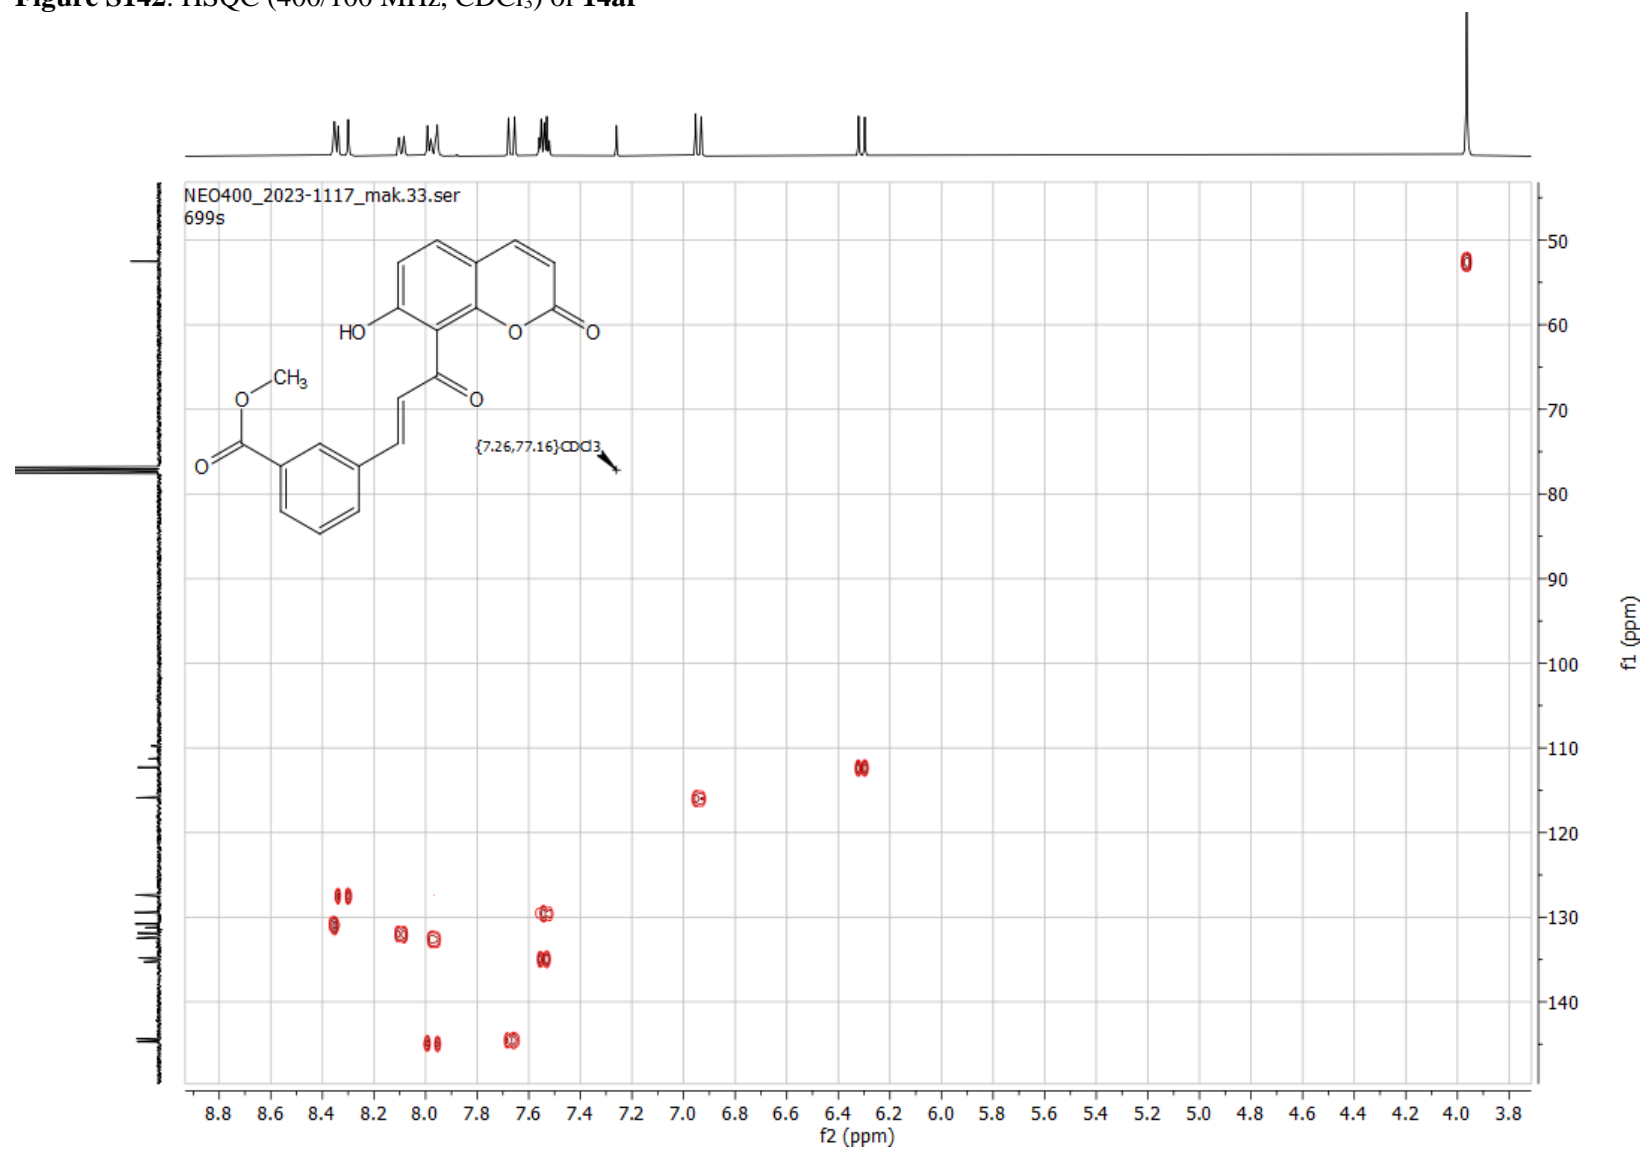

Figure S143: HMBC (400/100 MHz, CDCl<sub>3</sub>) of **14ar**

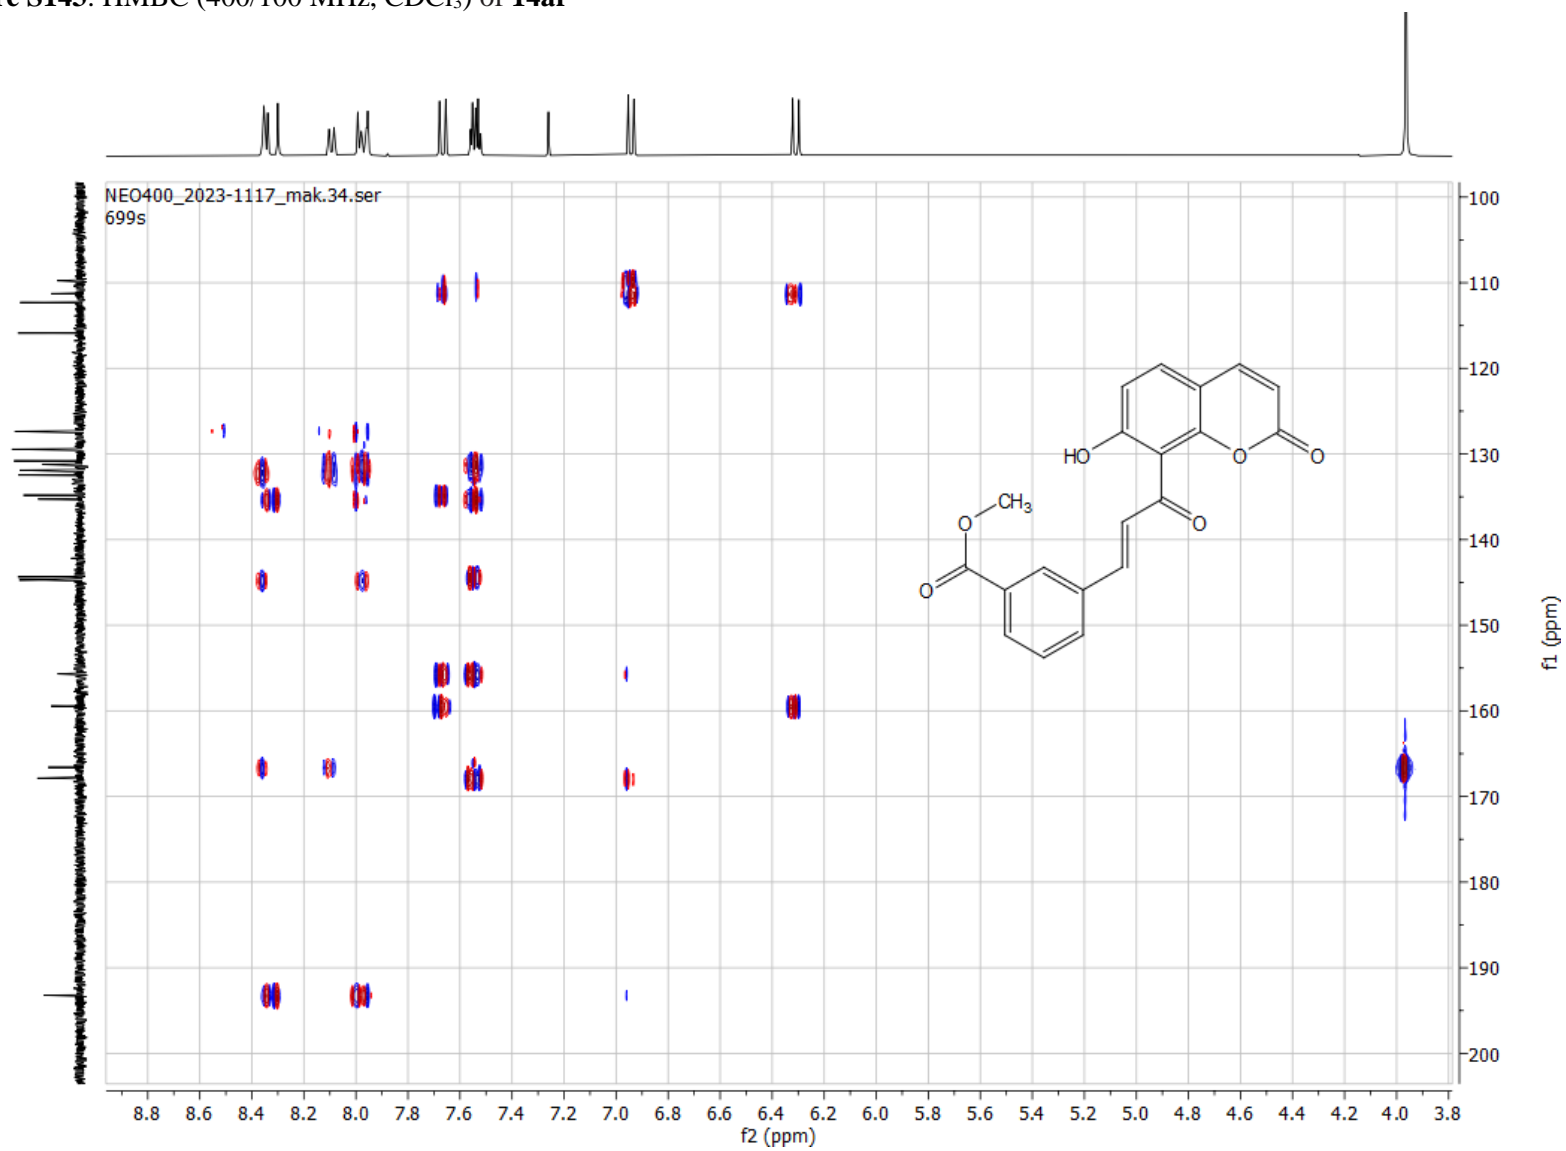

Figure S144: NOESY (400 MHz, CDCl<sub>3</sub>) of **14ar**

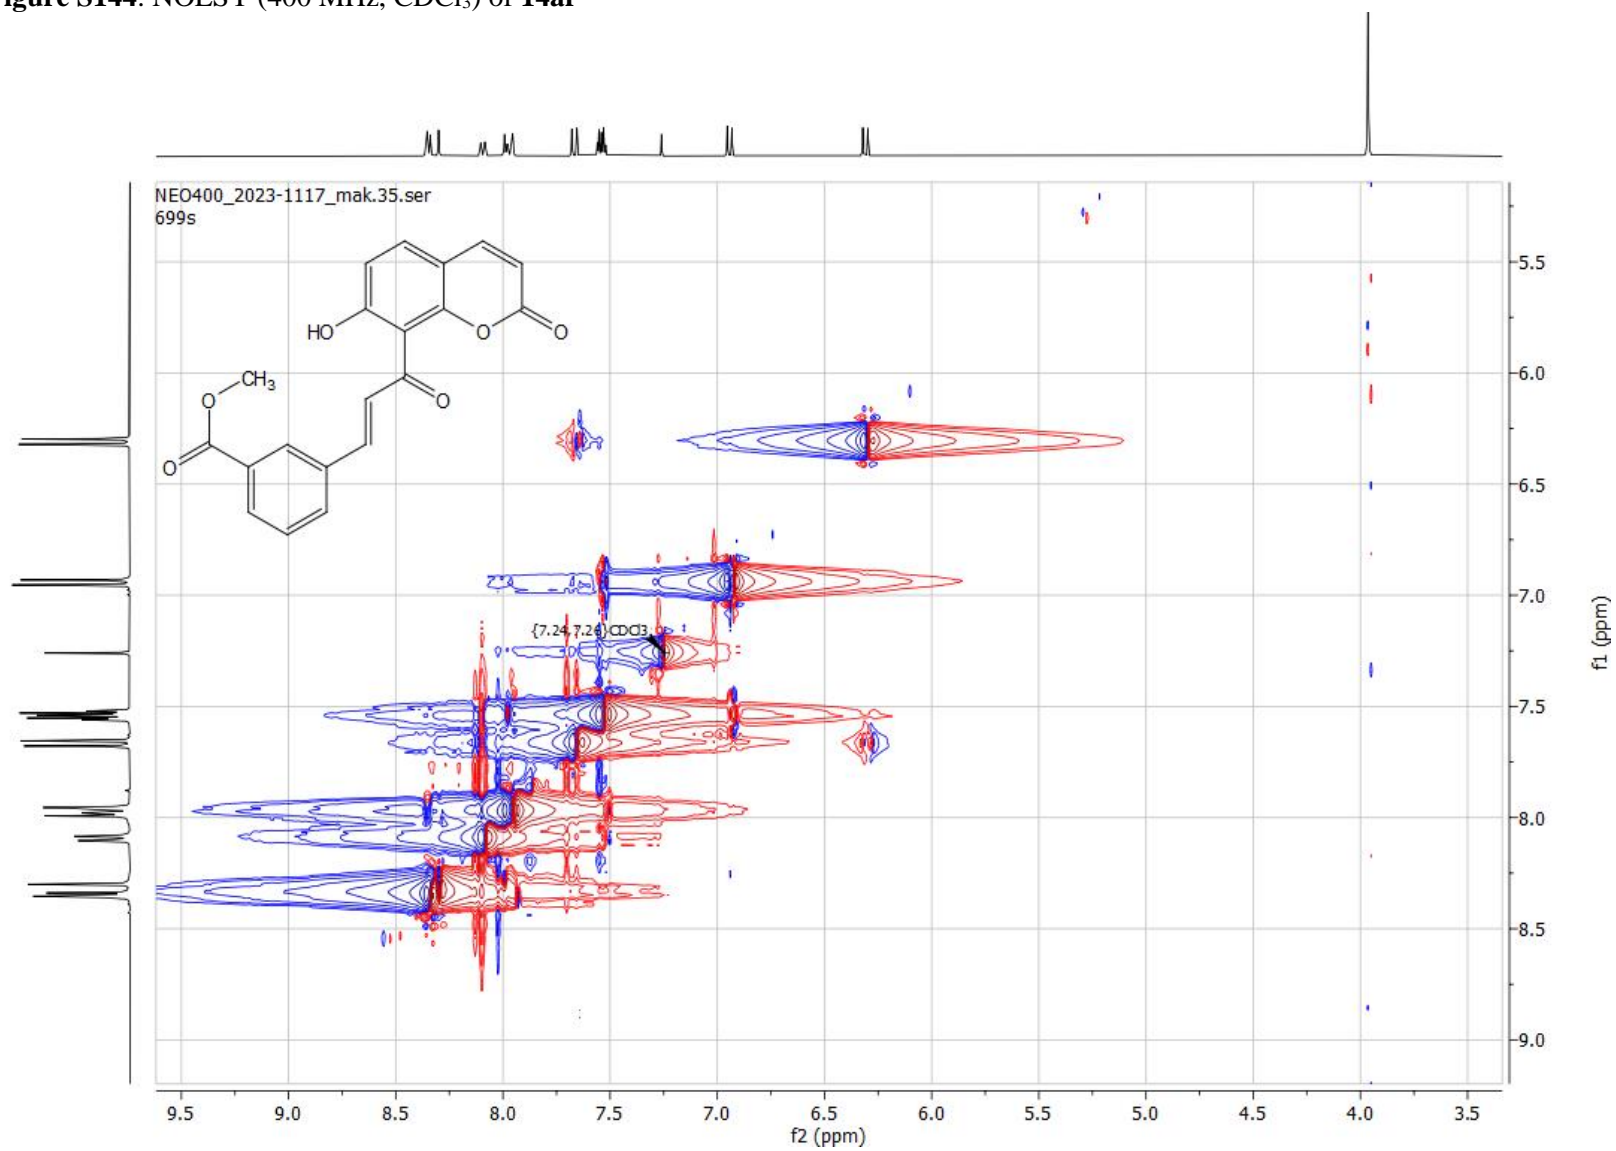

**Figure S145:** NMR-Signal assignment and selected HMBC-couplings for compound **13at**

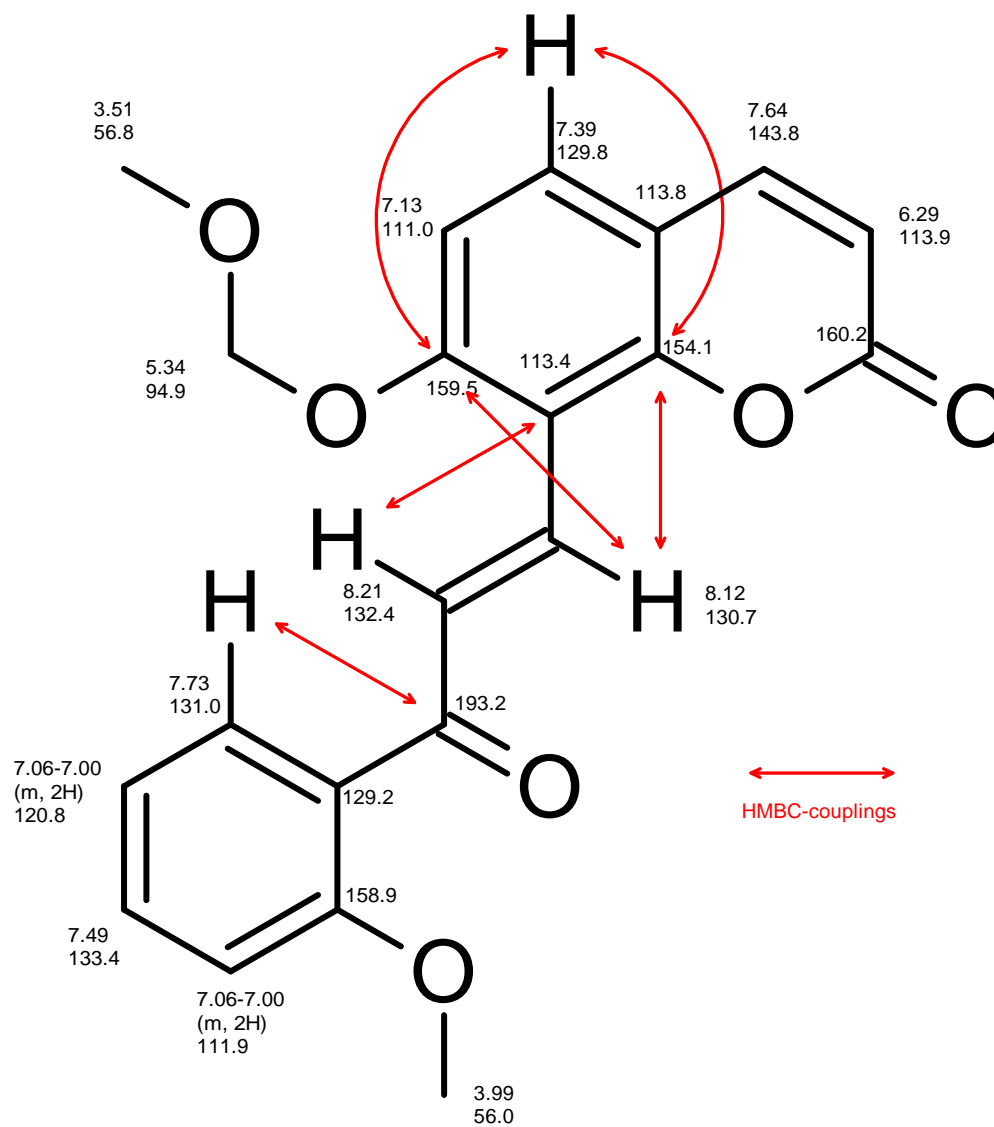

**Figure S146:**  $^1\text{H}$  NMR (400 MHz,  $\text{CDCl}_3$ ) of **13at**

NEO400\_2024-0430\_mak.30.fid  
715s

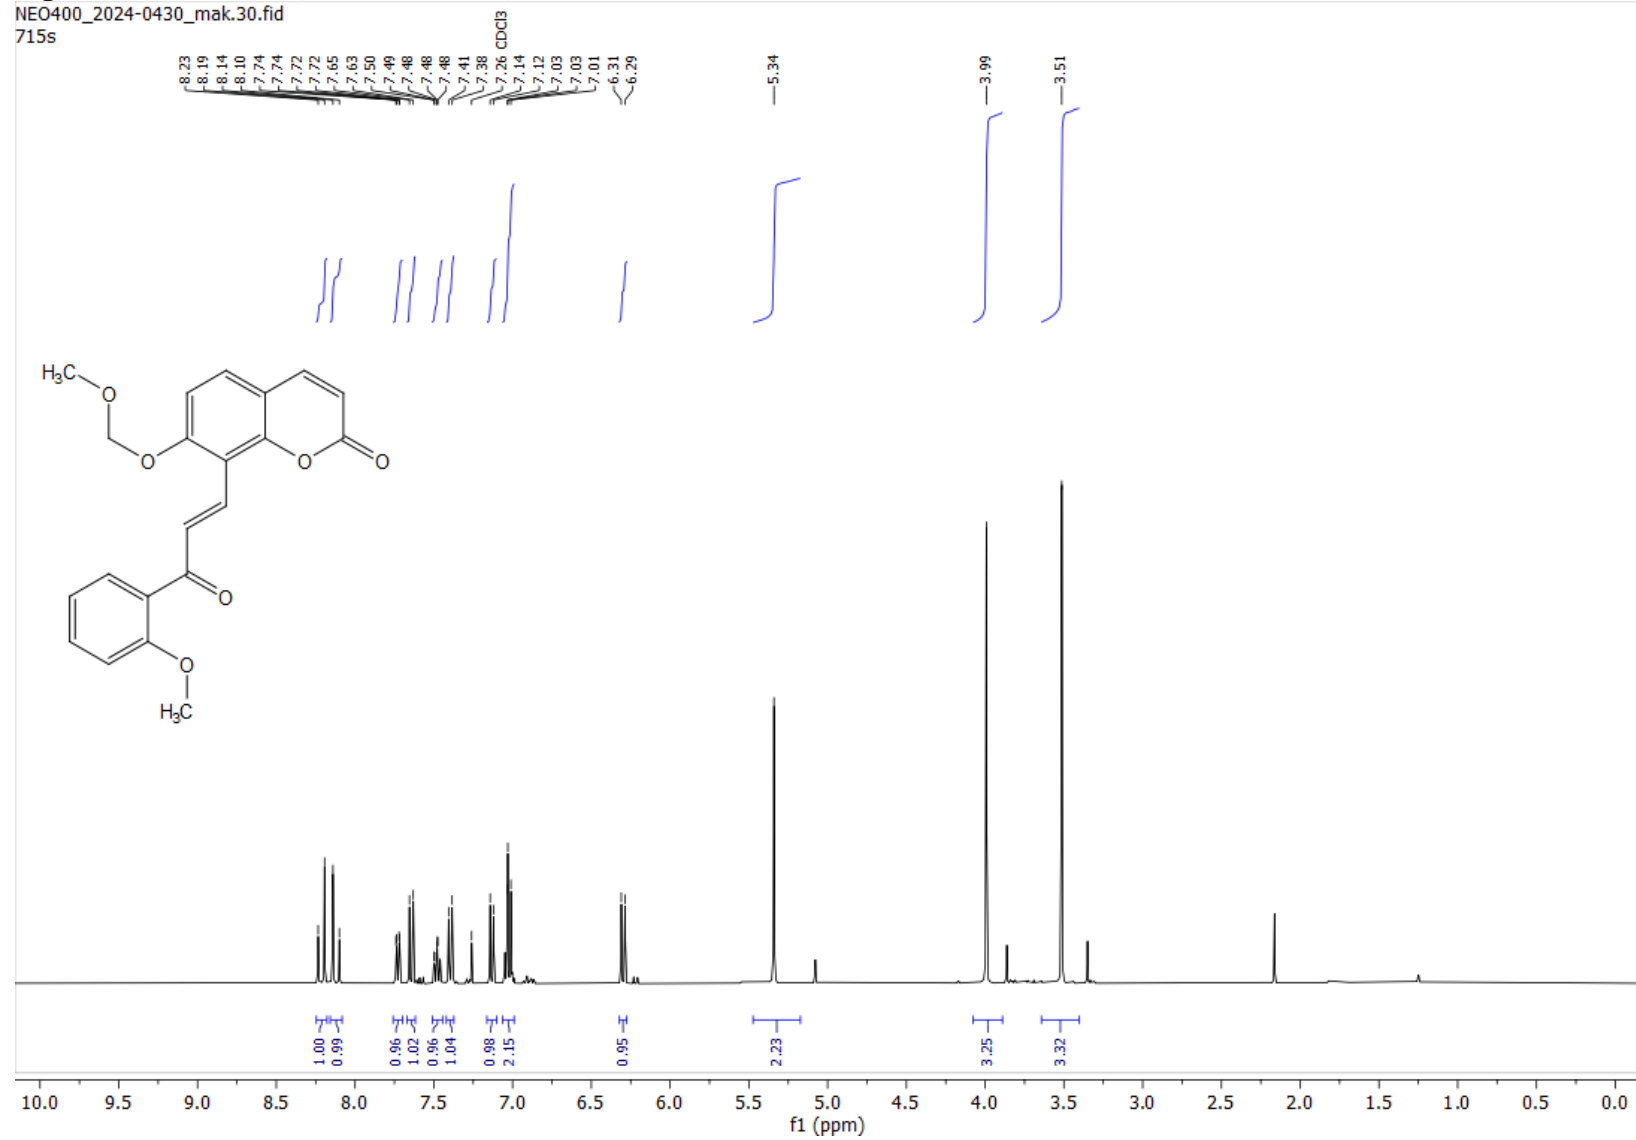

**Figure S147:**  $^{13}\text{C}\{^1\text{H}\}$  NMR (100 MHz,  $\text{CDCl}_3$ ) of **13at**

NEO400\_2024-0430\_mak.31.fid

715s

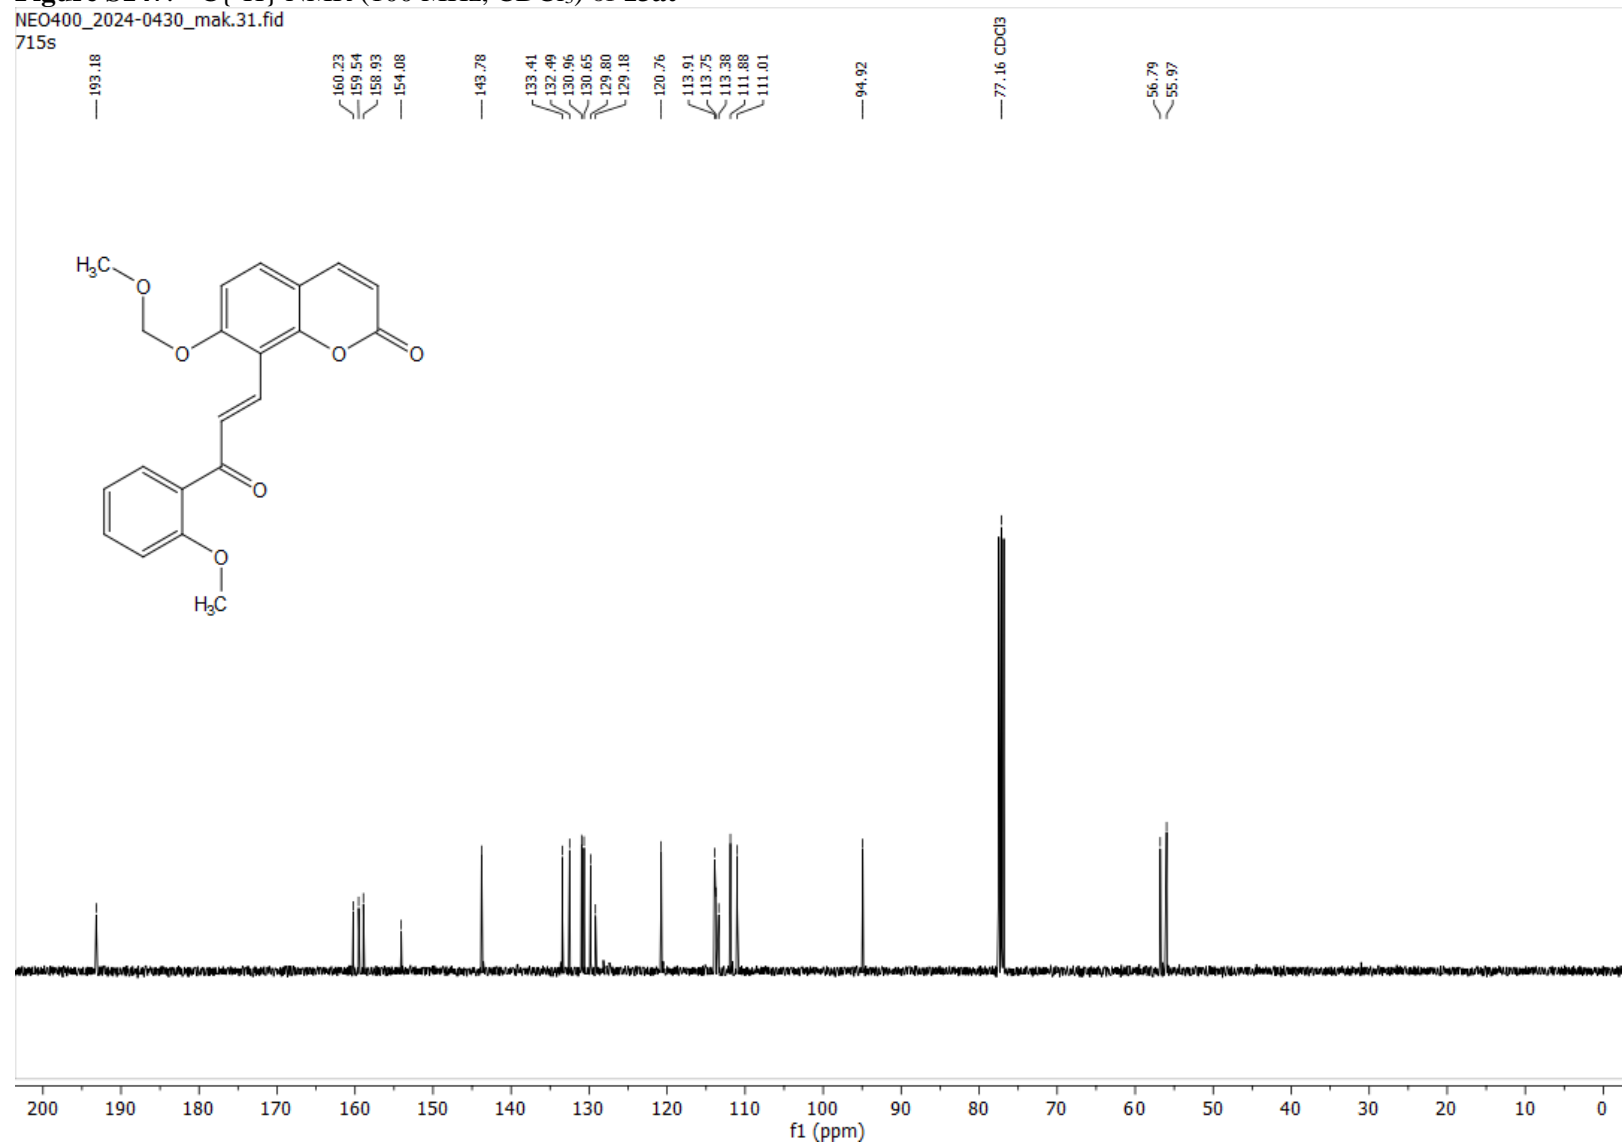

Figure S148: COSY (400 MHz, CDCl<sub>3</sub>) of **13at**

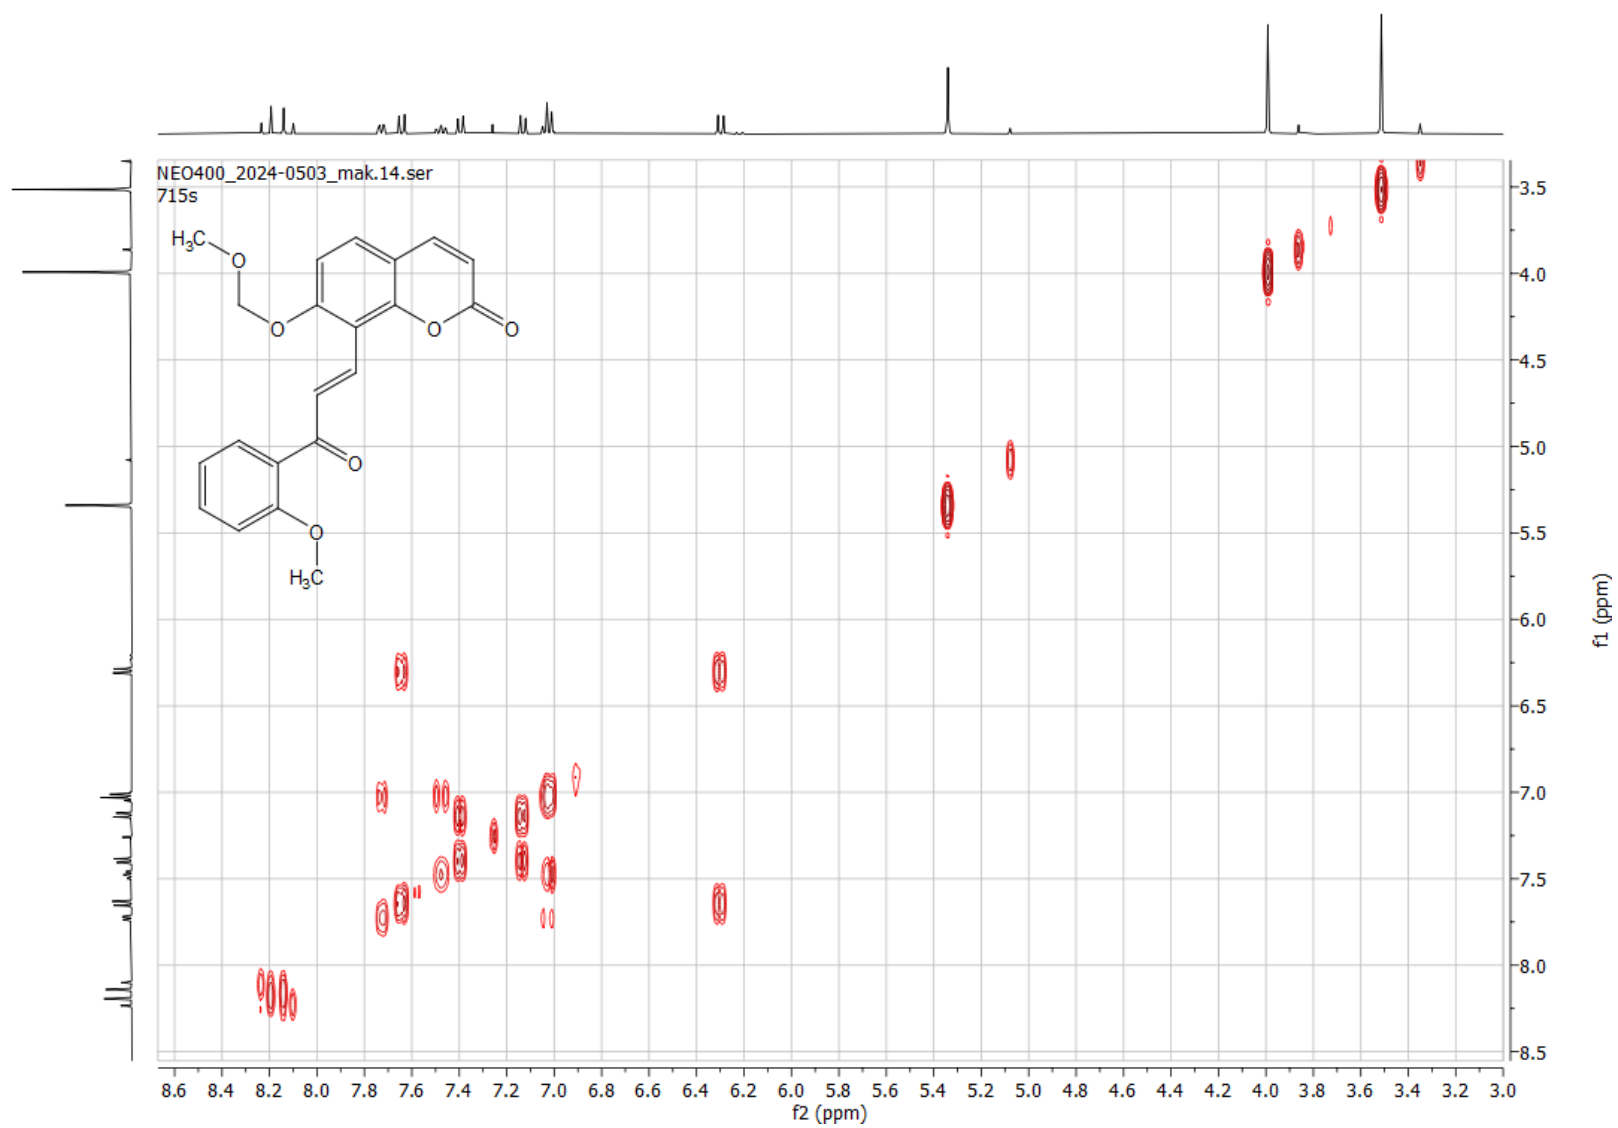

Figure S149: HSQC (400/100 MHz, CDCl<sub>3</sub>) of **13at**

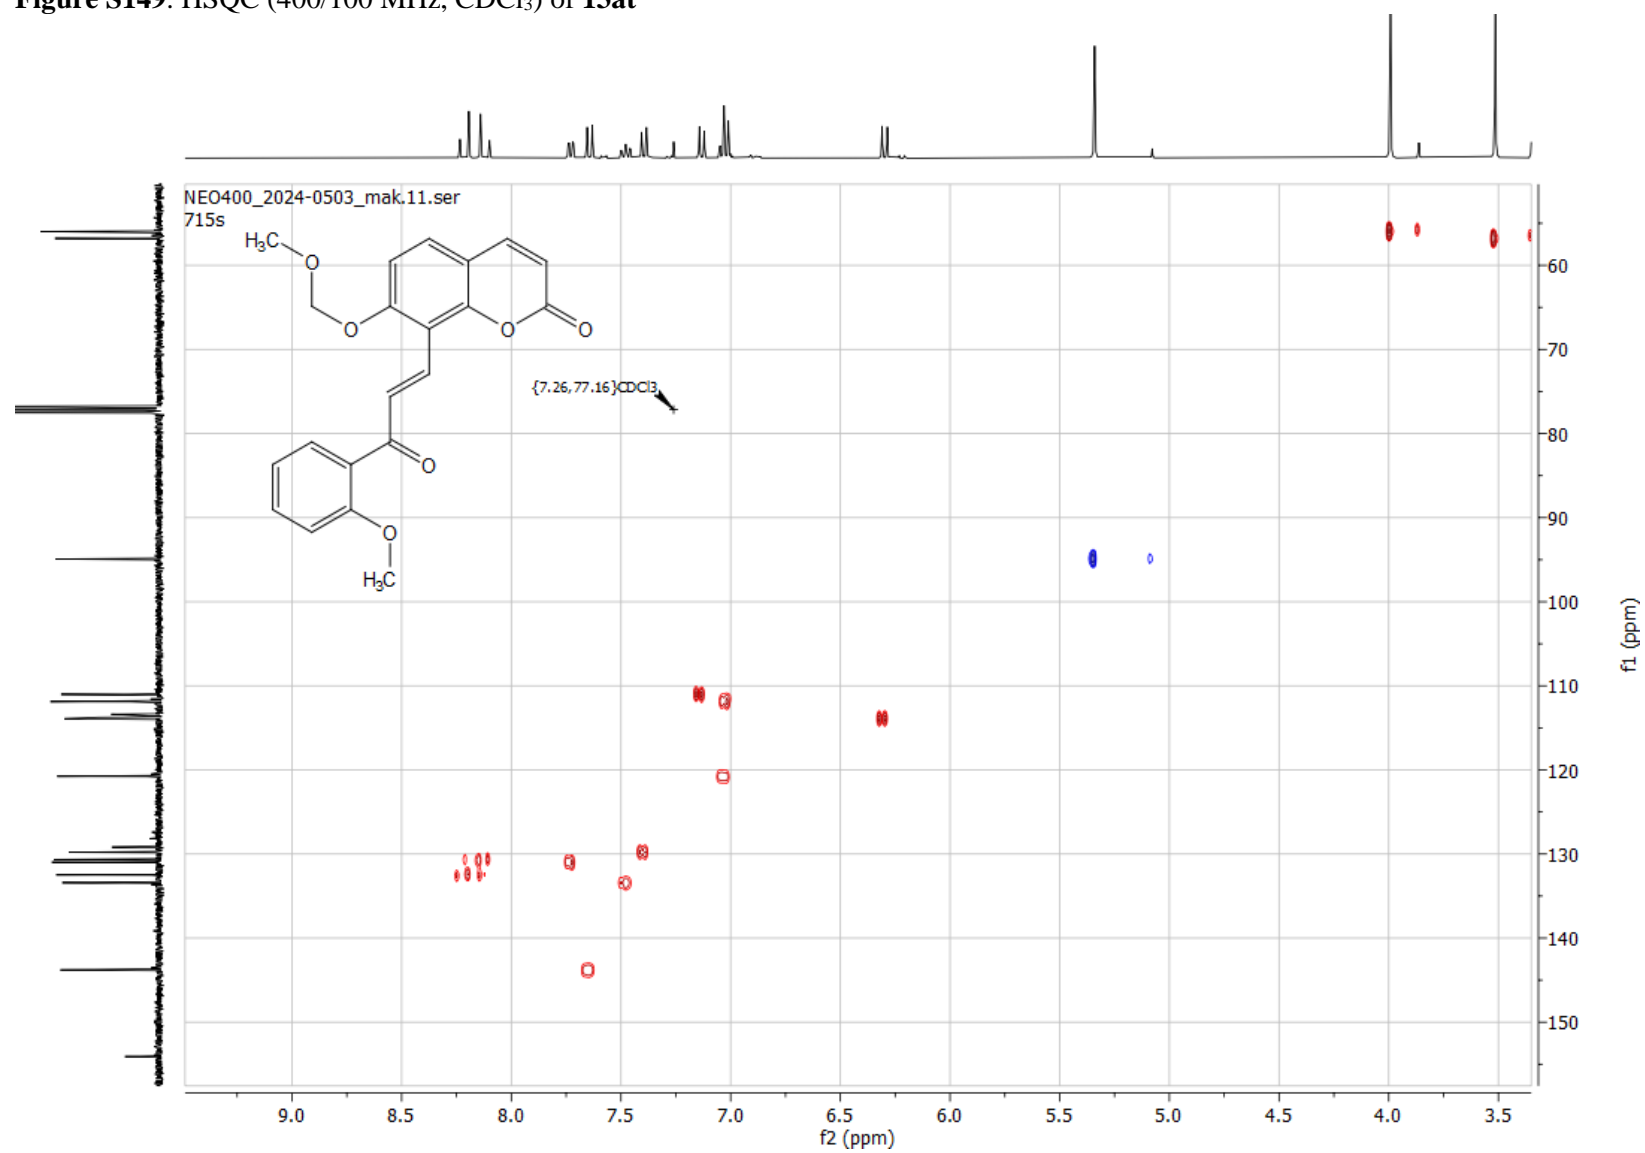



Figure S150: HMBC (400/100 MHz, CDCl<sub>3</sub>) of **13at**

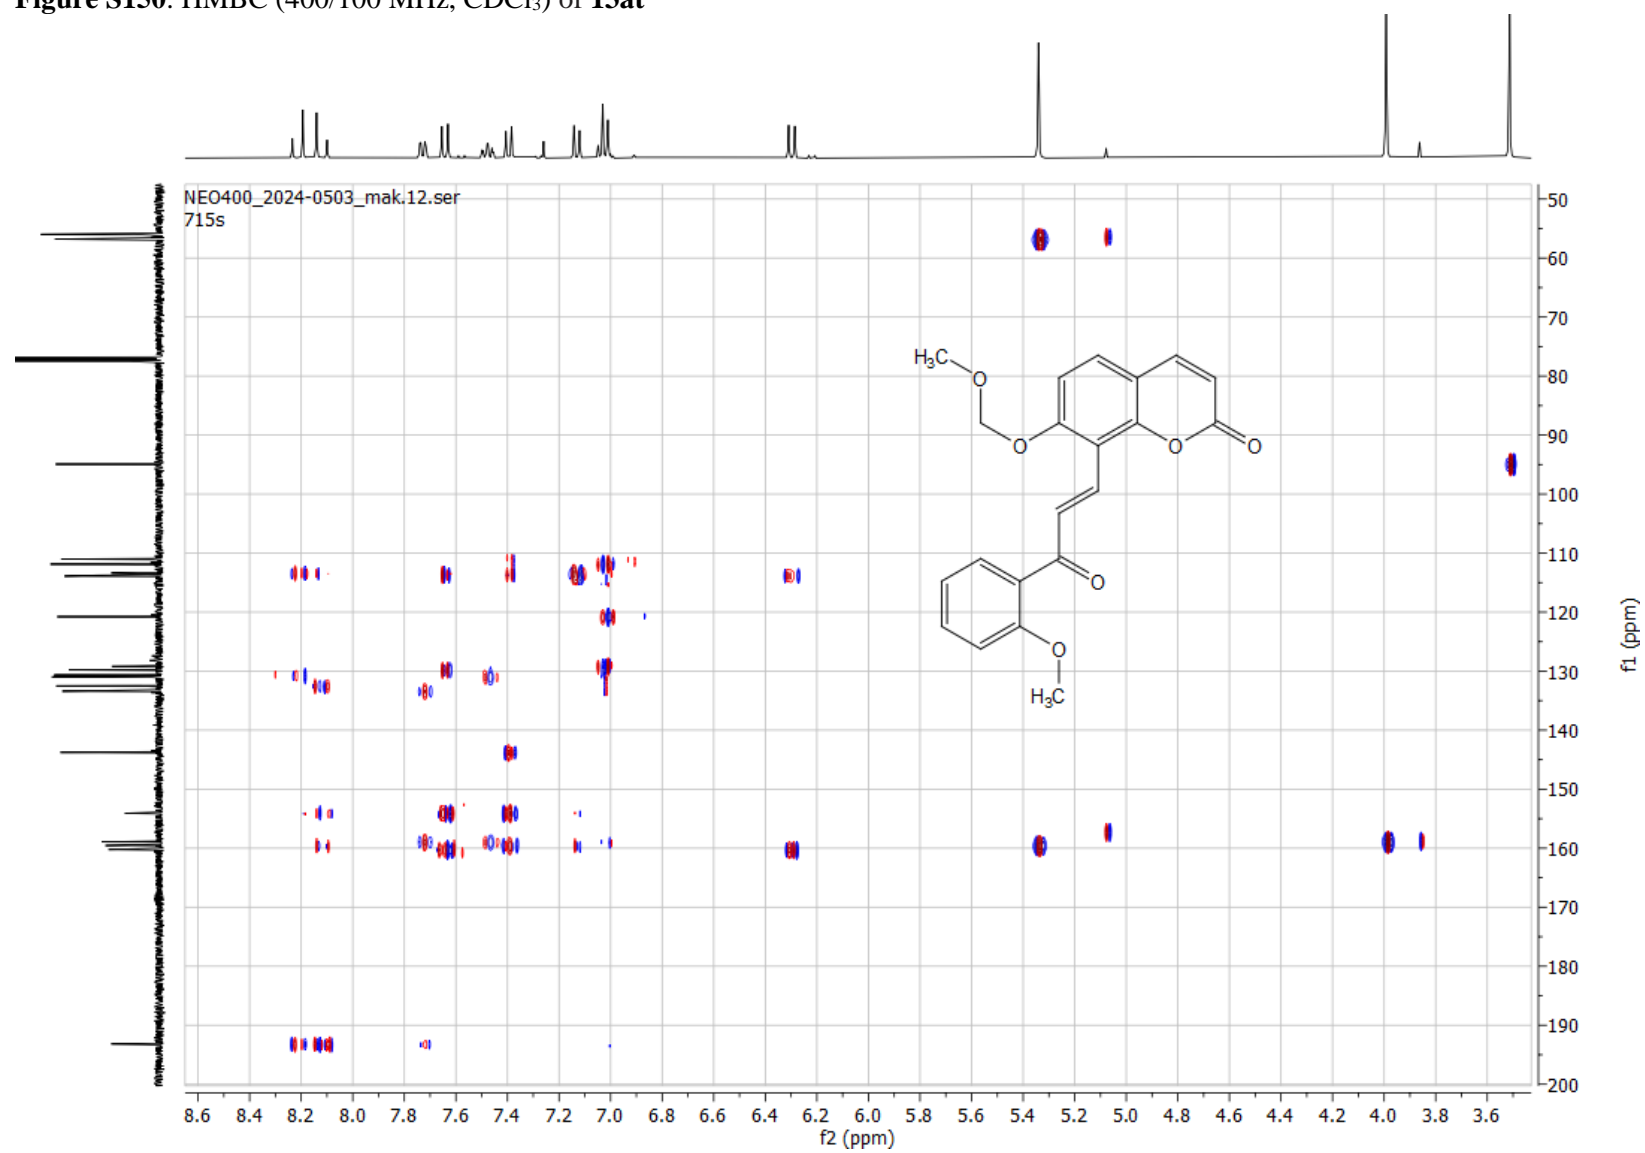

Figure S151: NOESY (400 MHz, CDCl<sub>3</sub>) of **13at**

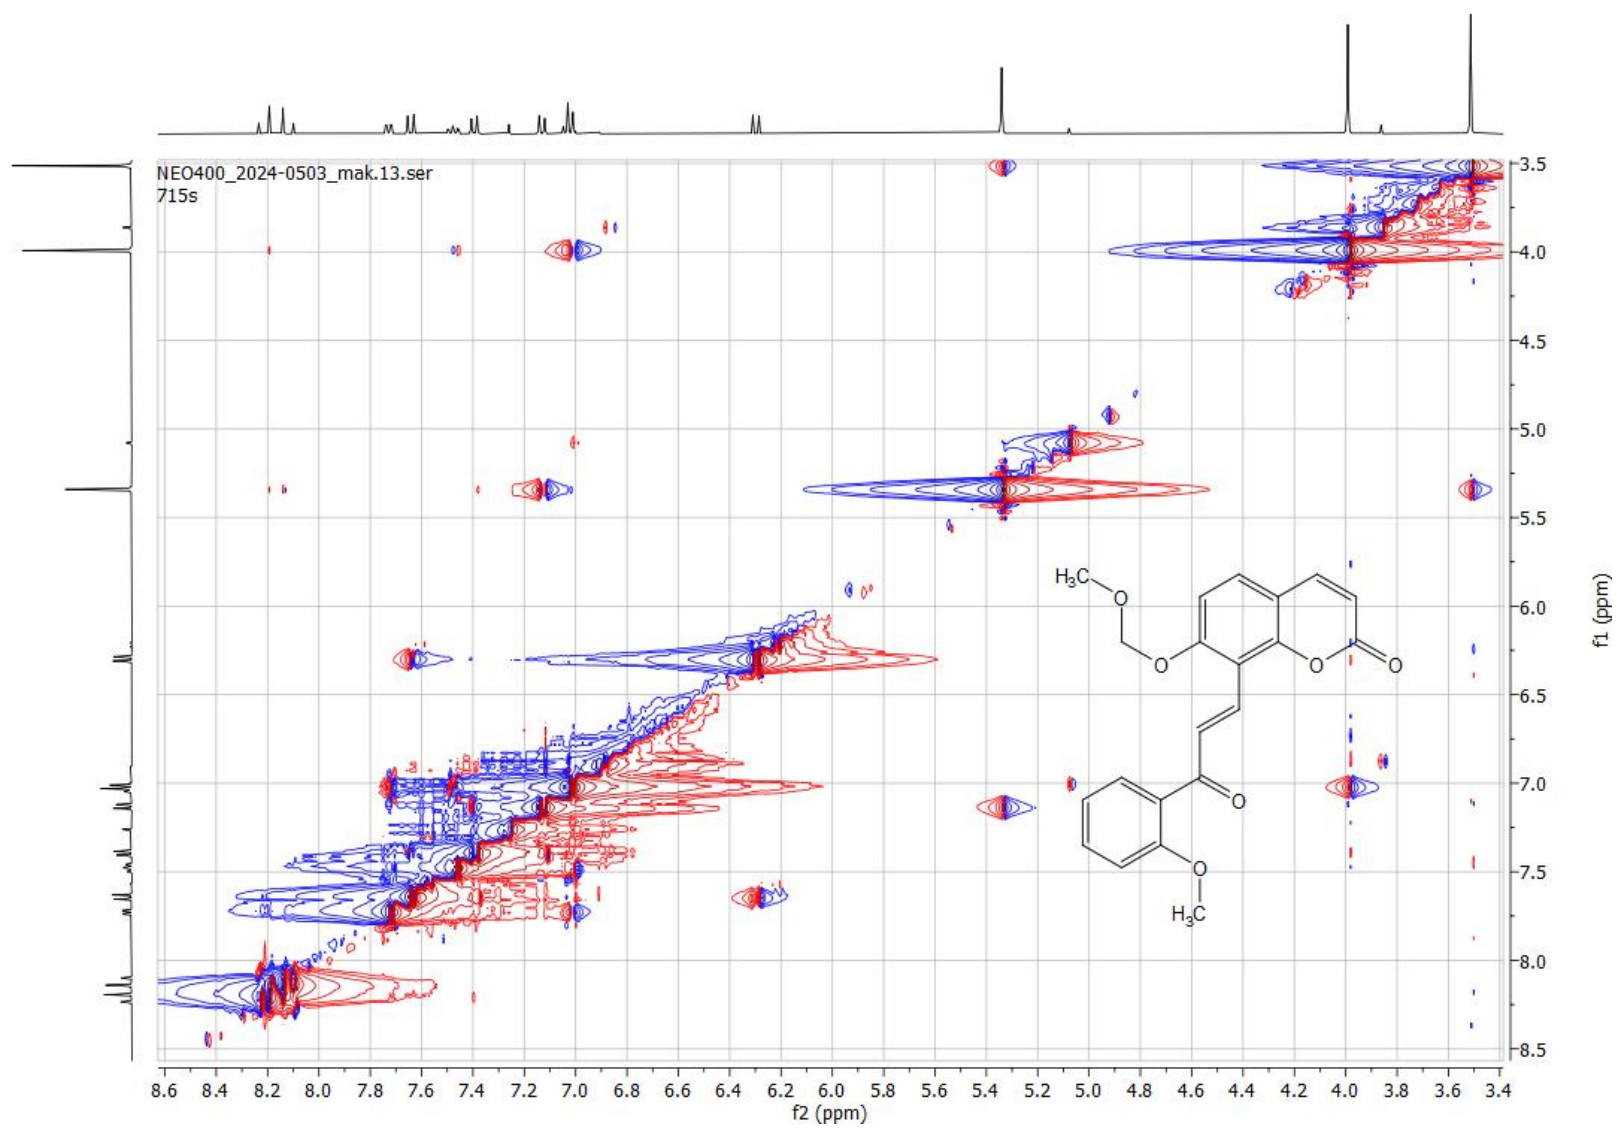

**Figure S152:** NMR-Signal assignment and selected HMBC-couplings and NOE-interaction for compound **14au**

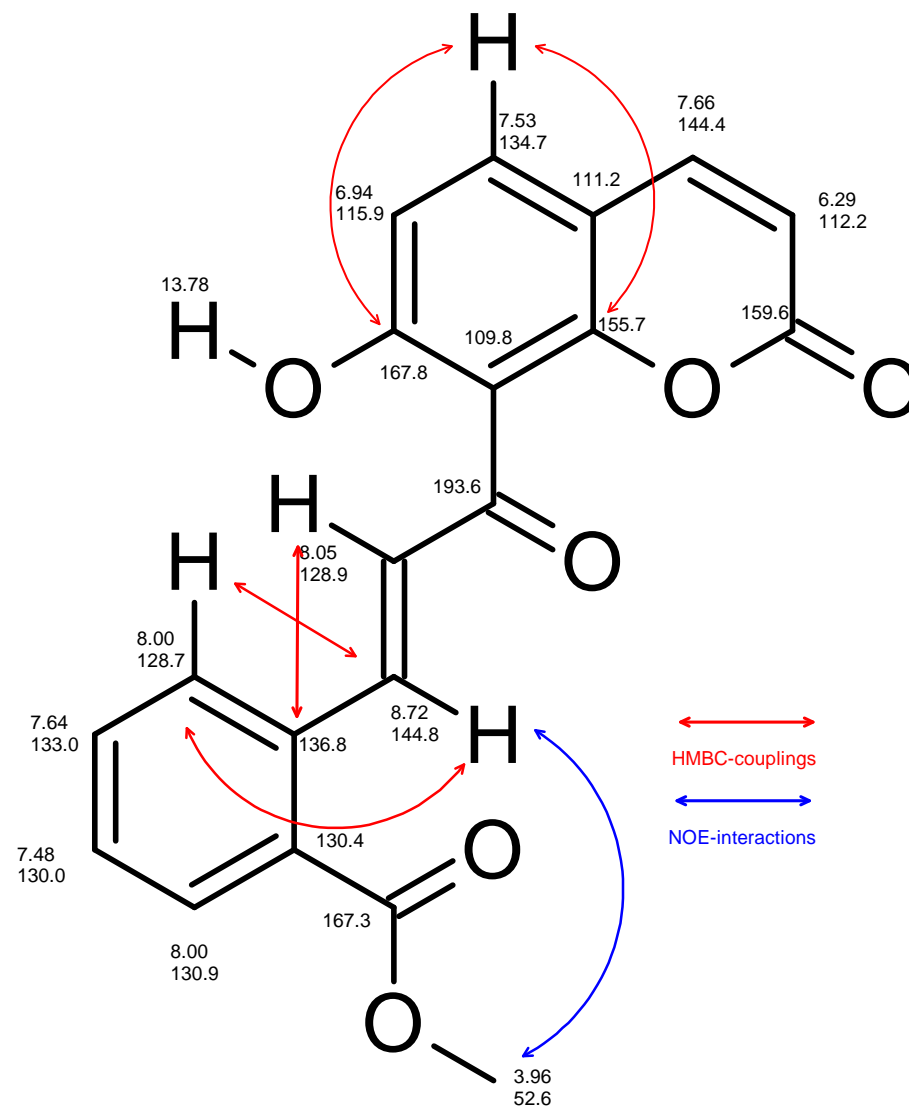

**Figure S153:**  $^1\text{H}$  NMR (400 MHz,  $\text{CDCl}_3$ ) of **14au**

NEO400\_2024-0322\_mak.10.fid

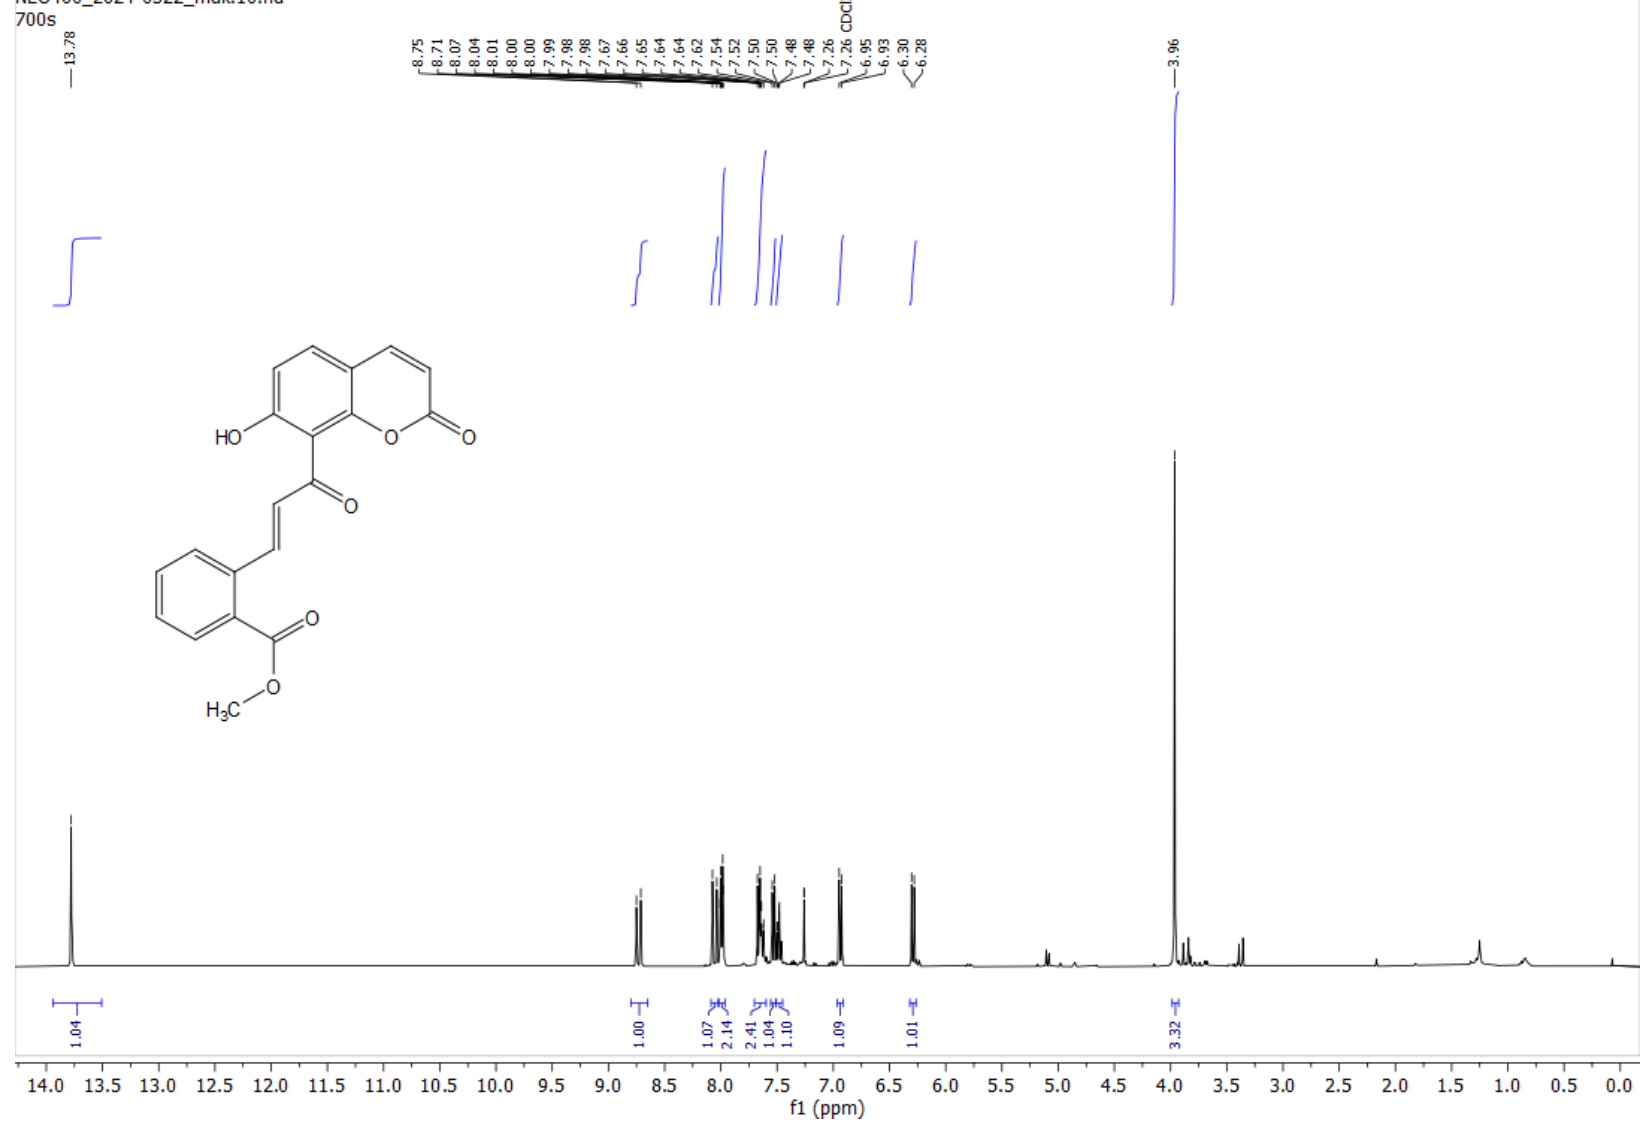

**Figure S154:**  $^{13}\text{C}\{^1\text{H}\}$  NMR (100 MHz,  $\text{CDCl}_3$ ) of **14au**

NEO400\_2024-0322\_mak.11.fid

700s

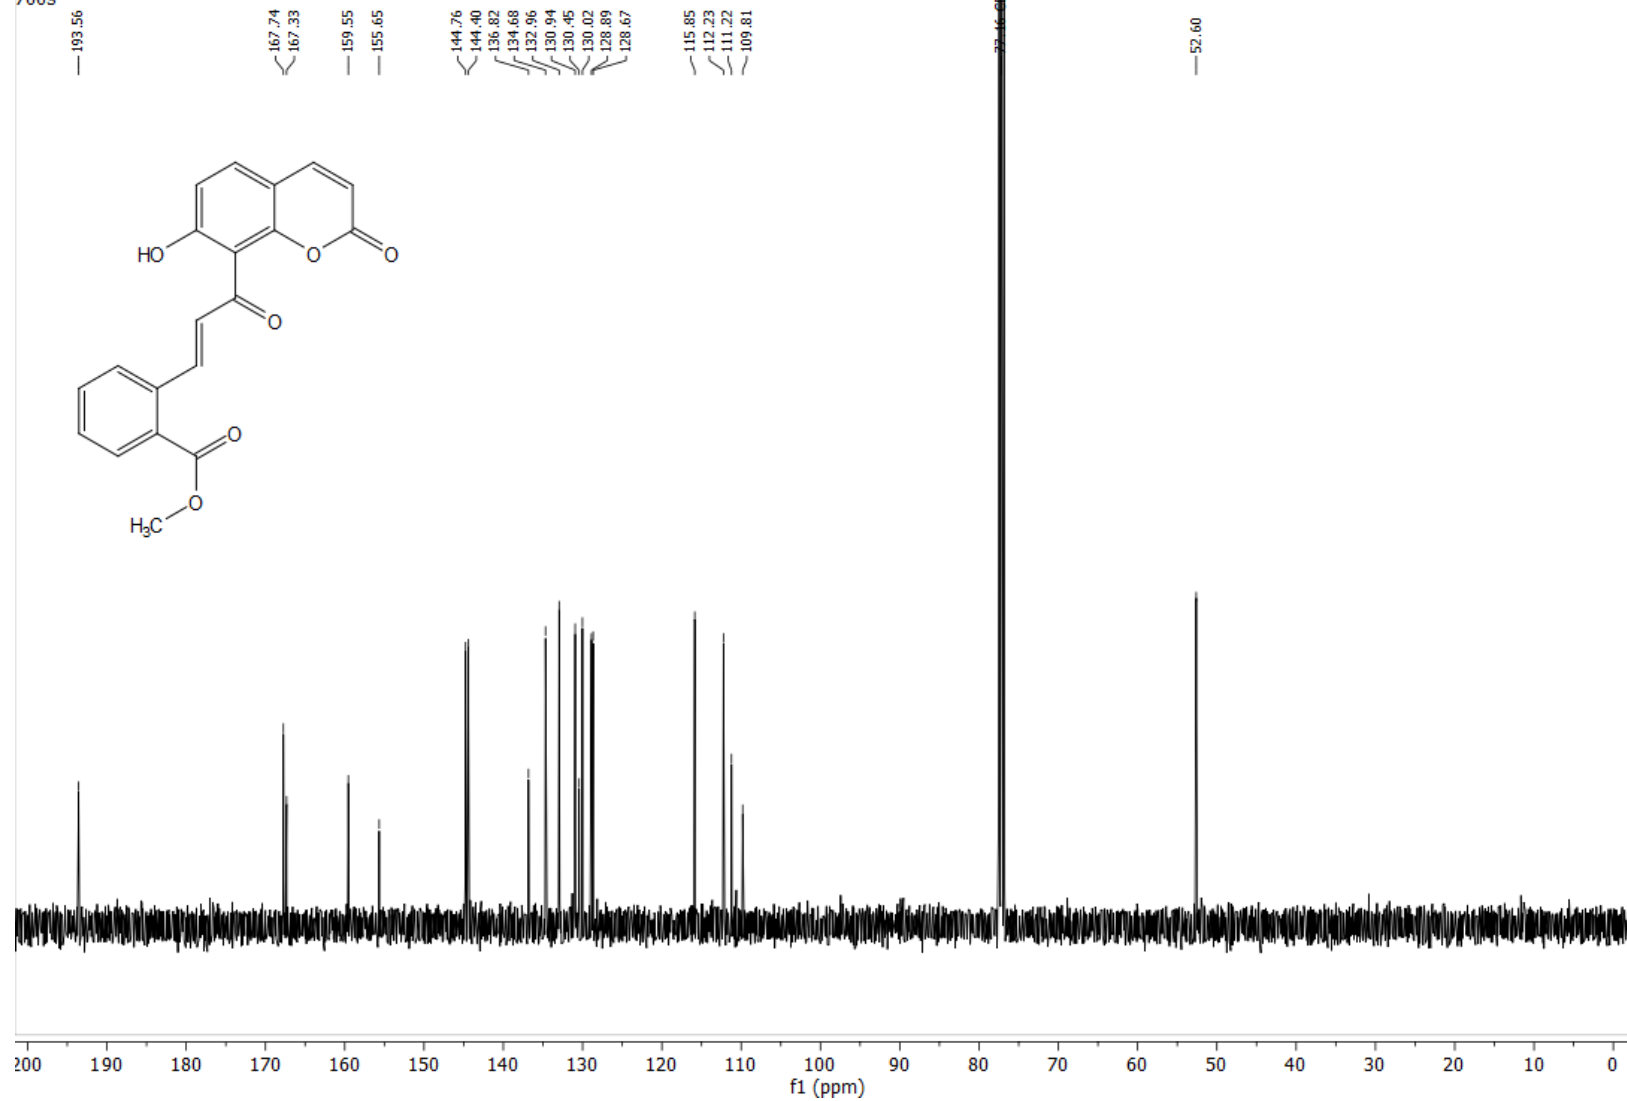

Figure S155: COSY (400 MHz, CDCl<sub>3</sub>) of 14au

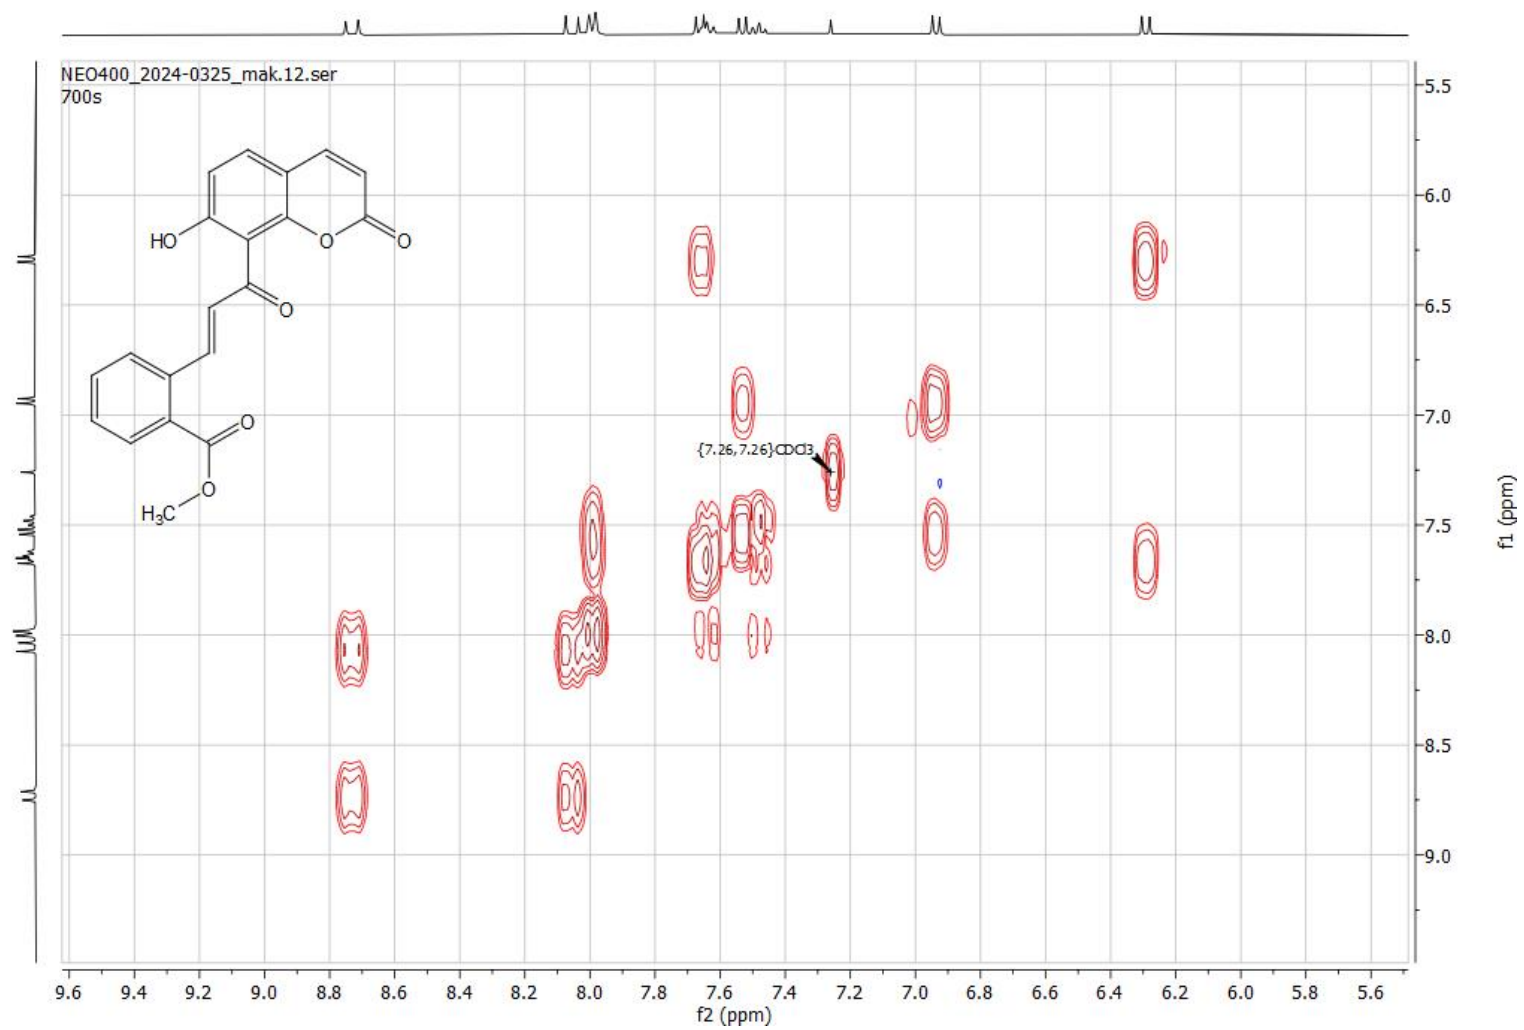

Figure S156: HSQC (400/100 MHz, CDCl<sub>3</sub>) of **14au**

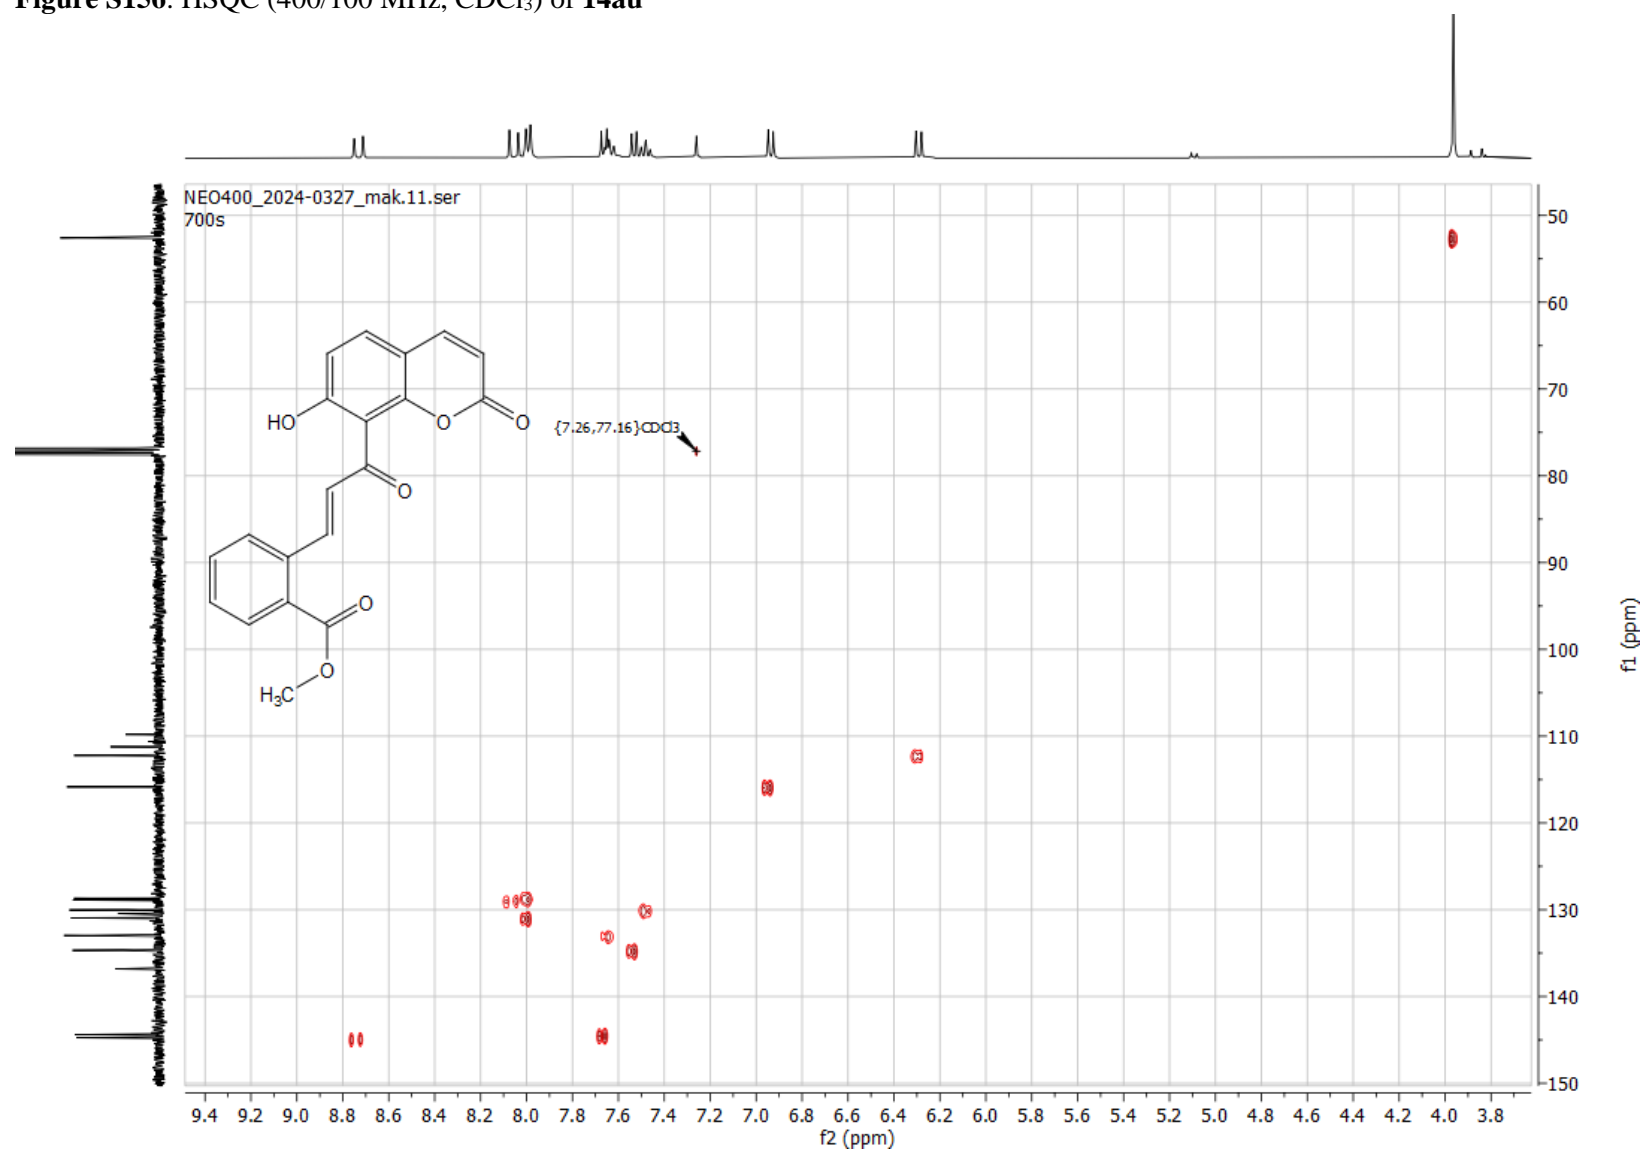

Figure S157: HMBC (400/100 MHz, CDCl<sub>3</sub>) of **14au**

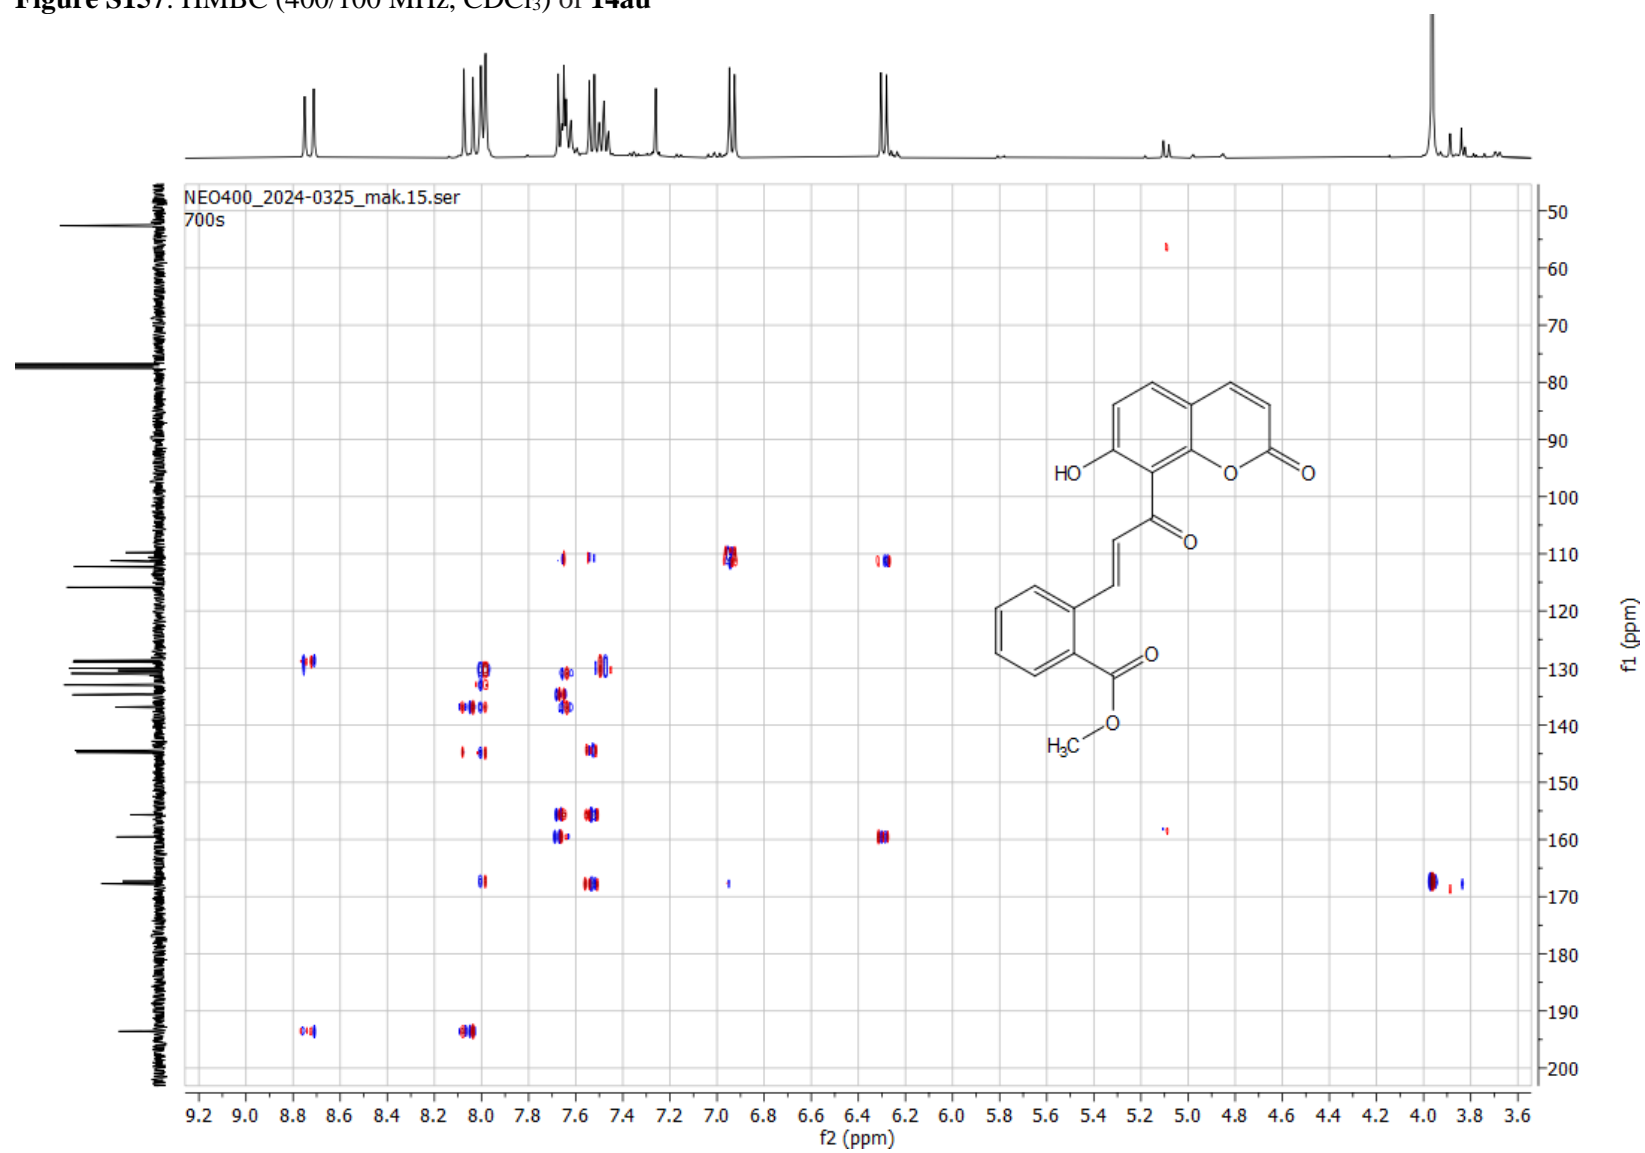



Figure S158: NOESY (400 MHz, CDCl<sub>3</sub>) of **14au**

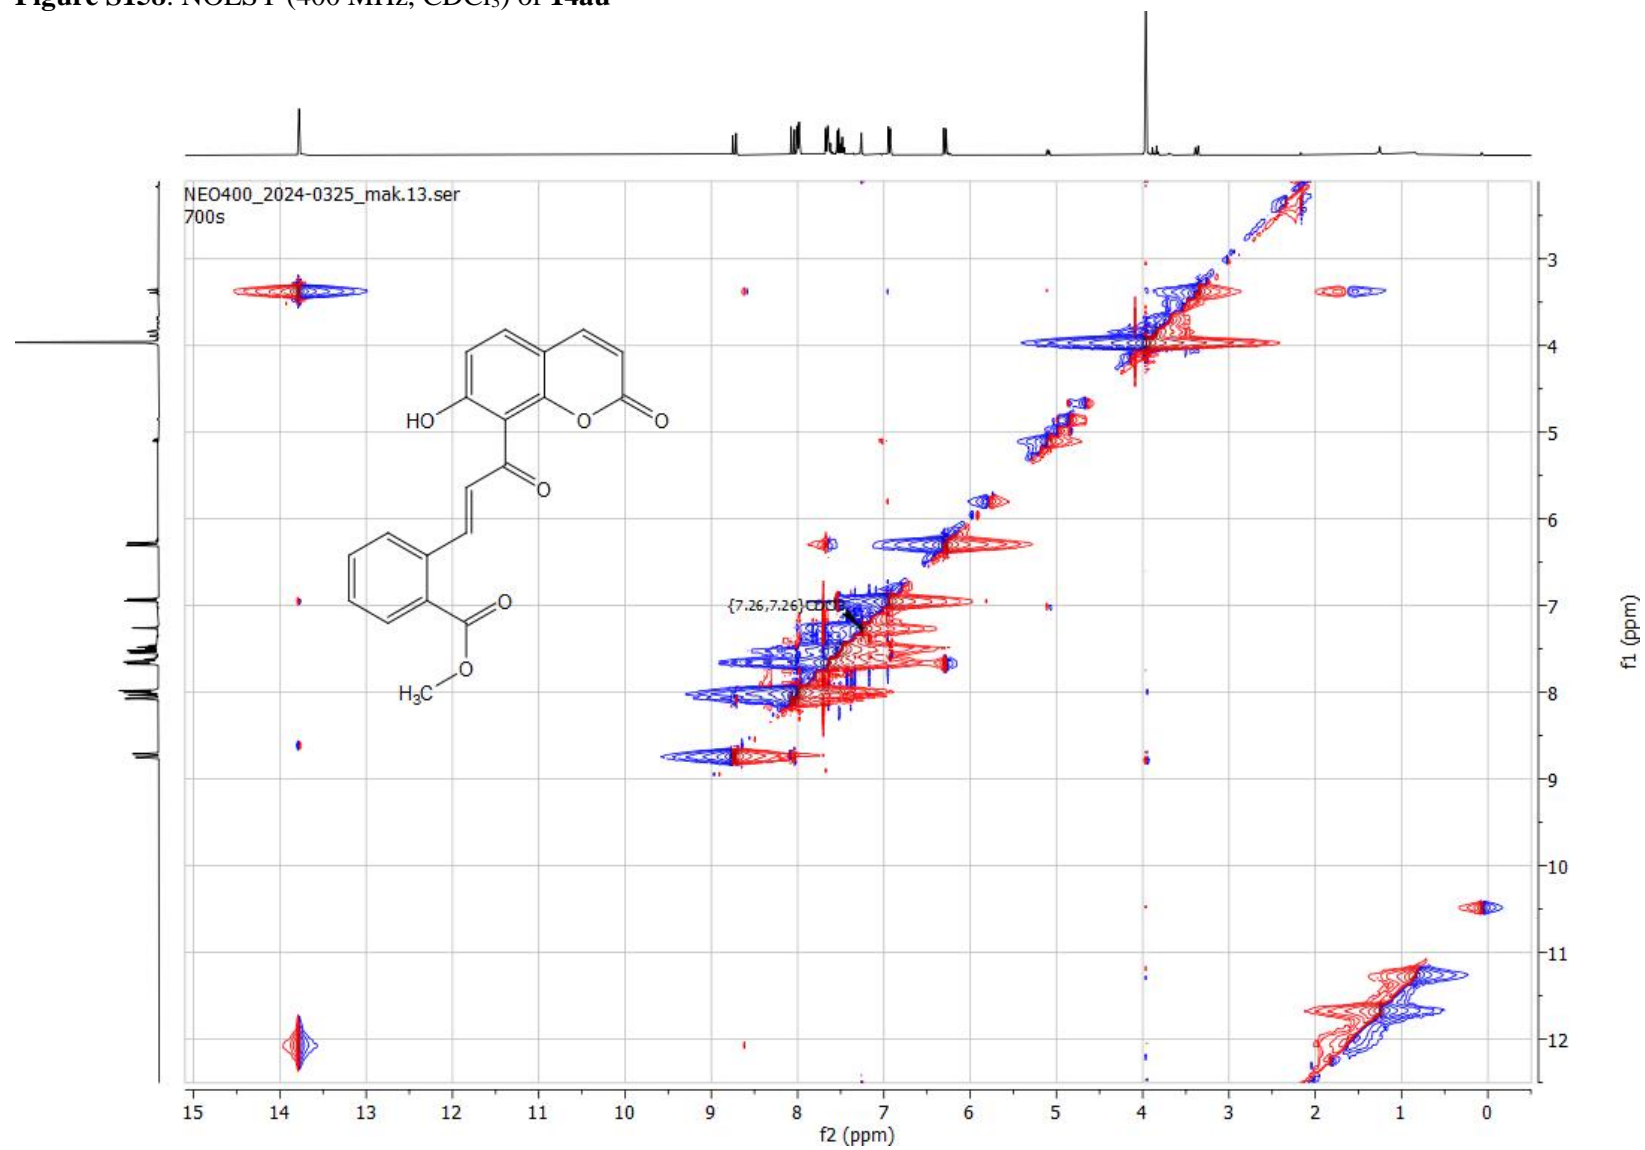



**Figure S160:**  $^1\text{H}$  NMR (400 MHz,  $\text{CDCl}_3$ ) of **16af**

NEO400\_2021-0719\_gk.10.fid

GK - 251 - 1H -  $\text{CDCl}_3$

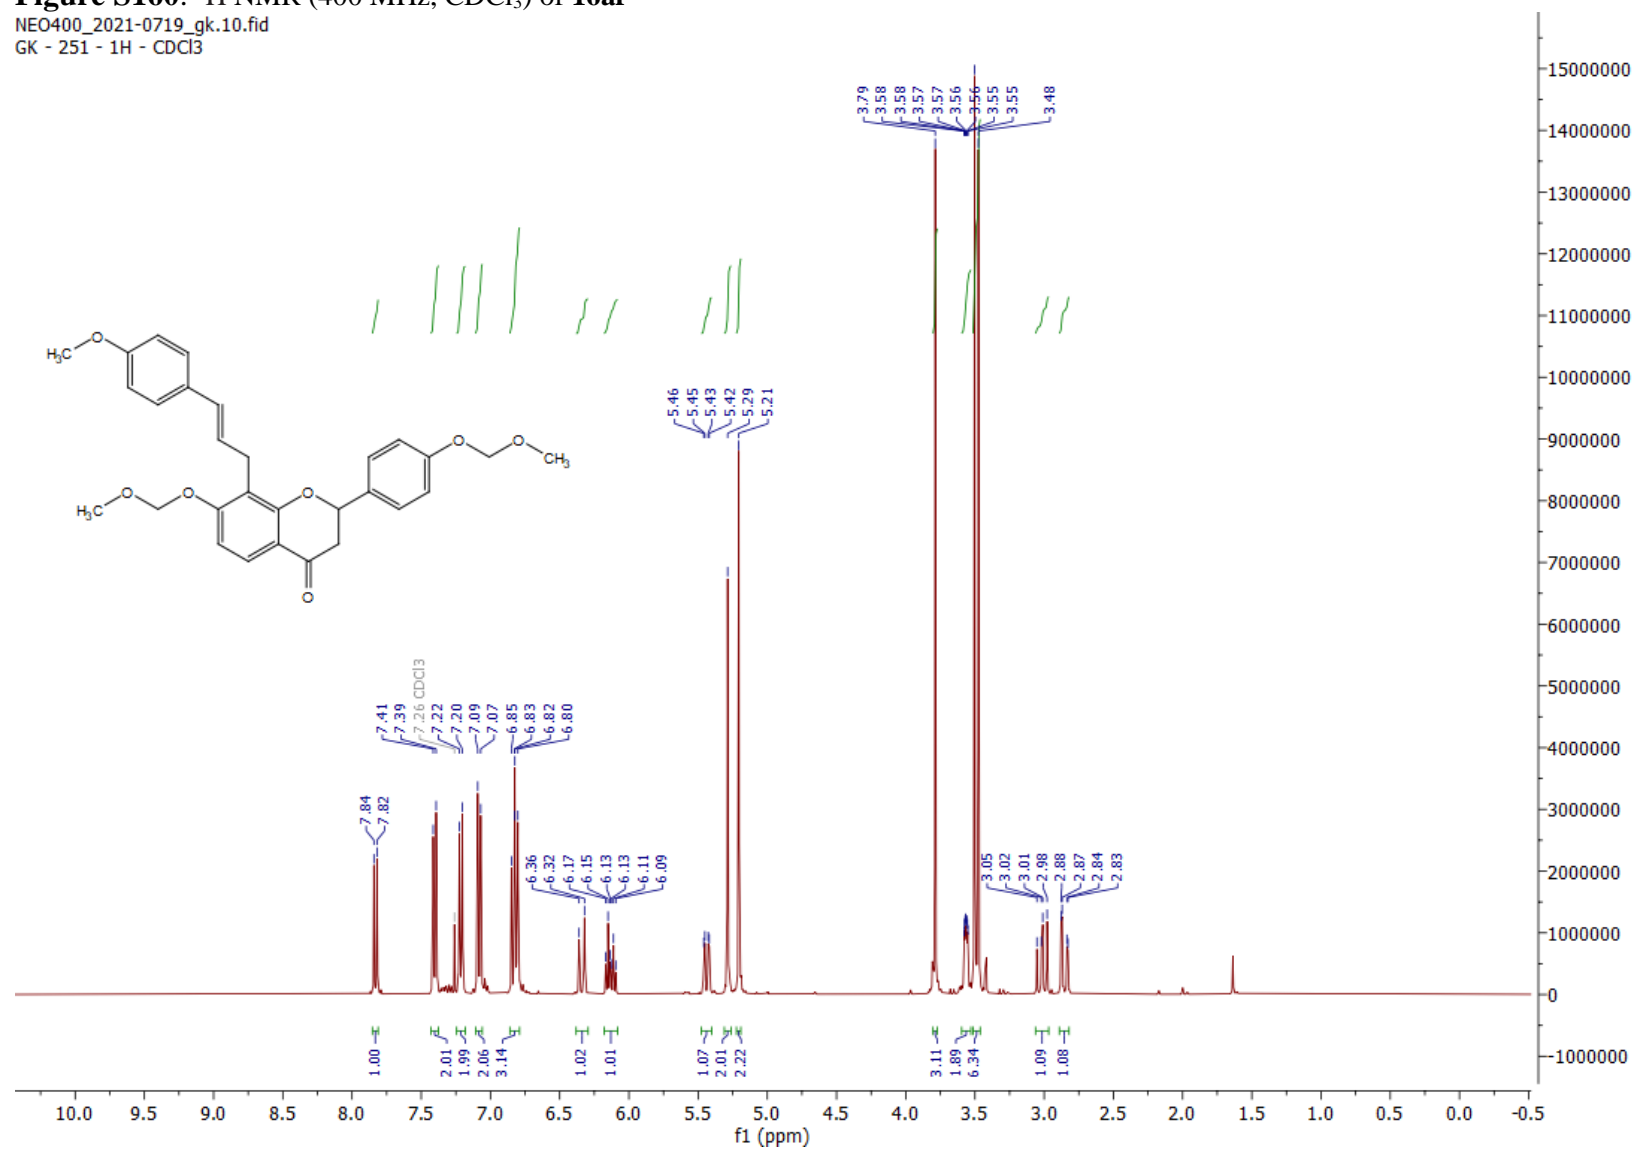

**Figure S161:**  $^{13}\text{C}\{^1\text{H}\}$  NMR (100 MHz,  $\text{CDCl}_3$ ) of **16af**

NEO400\_2021-0719\_gk.11.fid  
GK - 251 - 13C -  $\text{CDCl}_3$

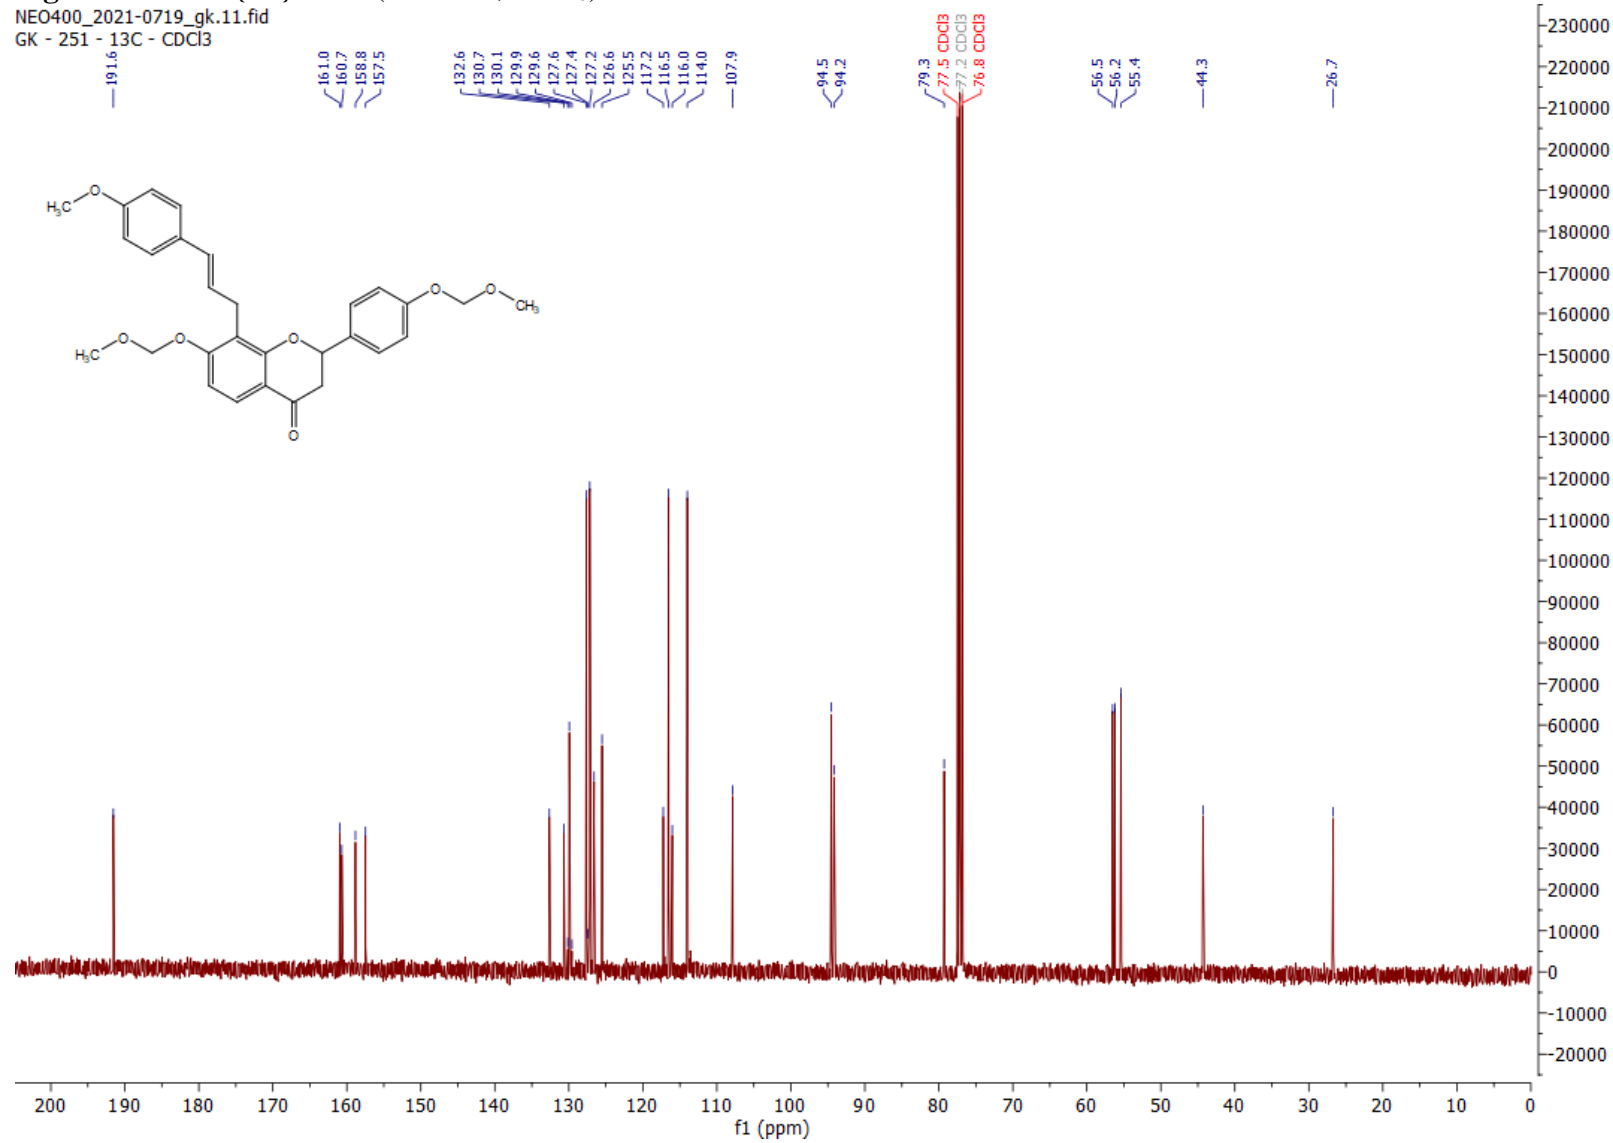

Figure S162: HSQC (400/100 MHz, CDCl<sub>3</sub>) of **16af**

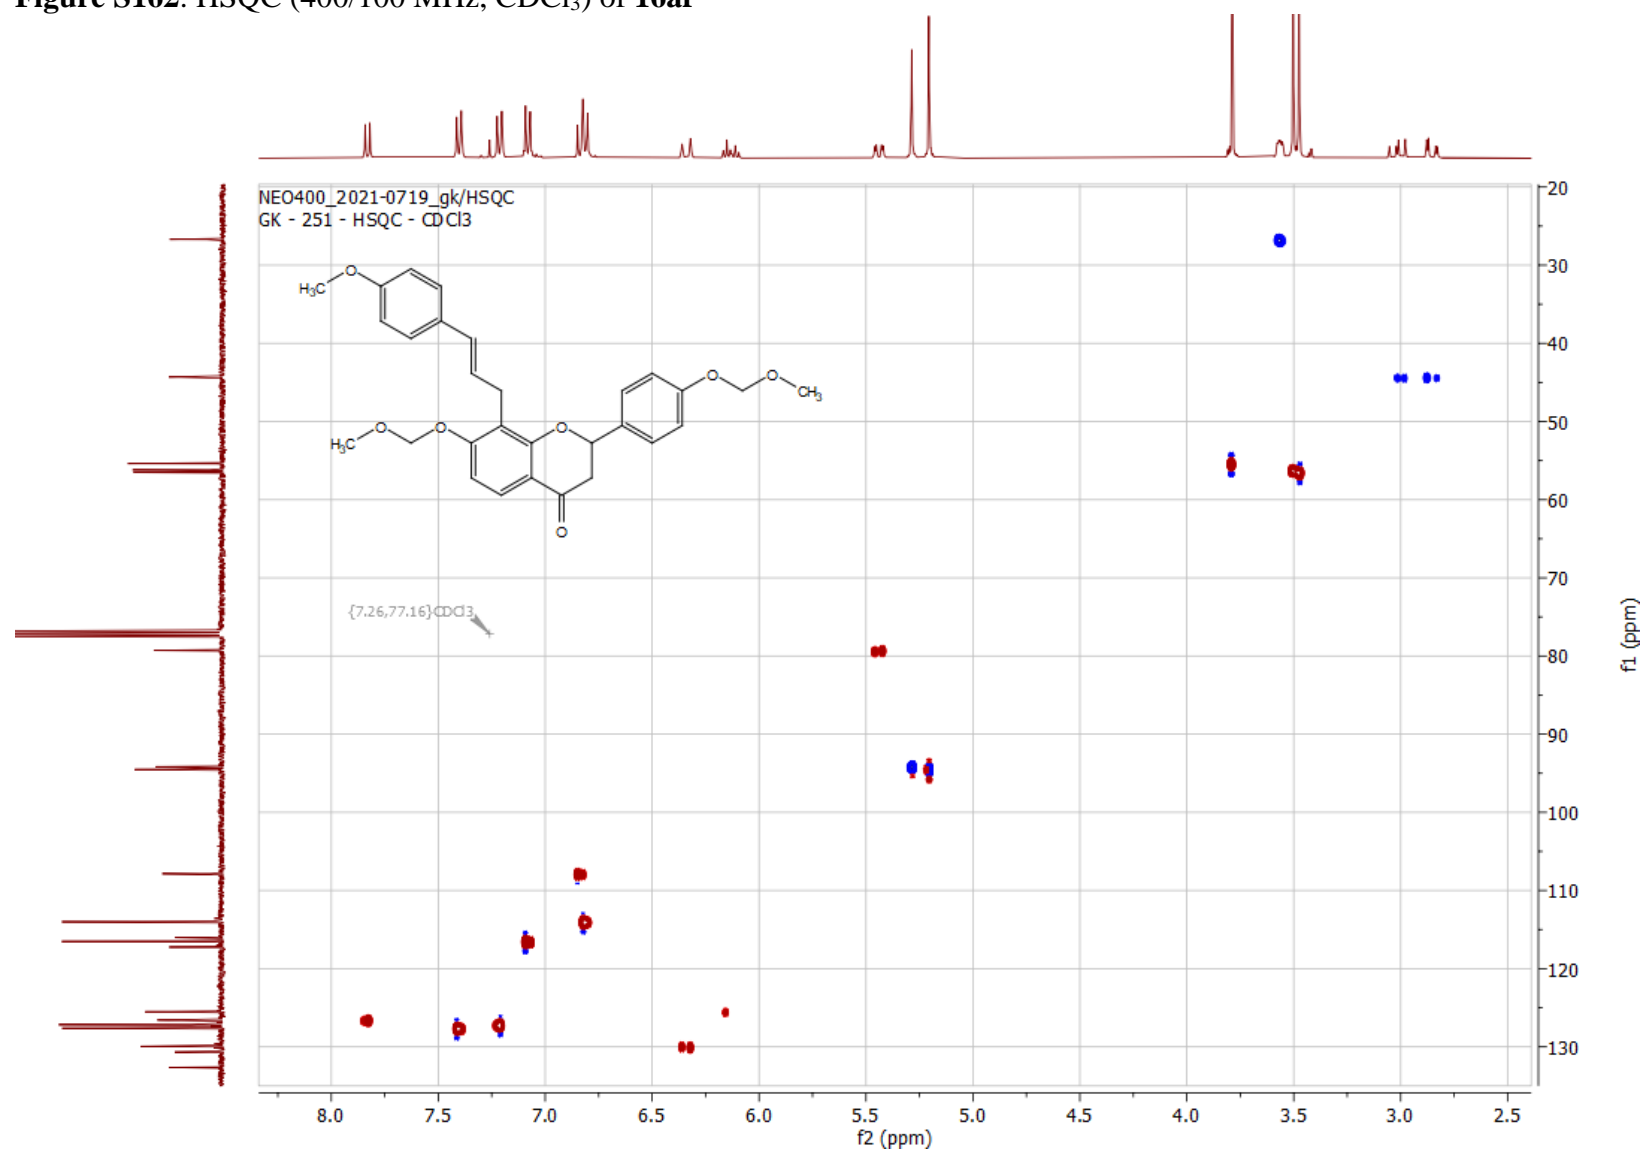

Figure S163: HMBC (400/100 MHz, CDCl<sub>3</sub>) of 16af

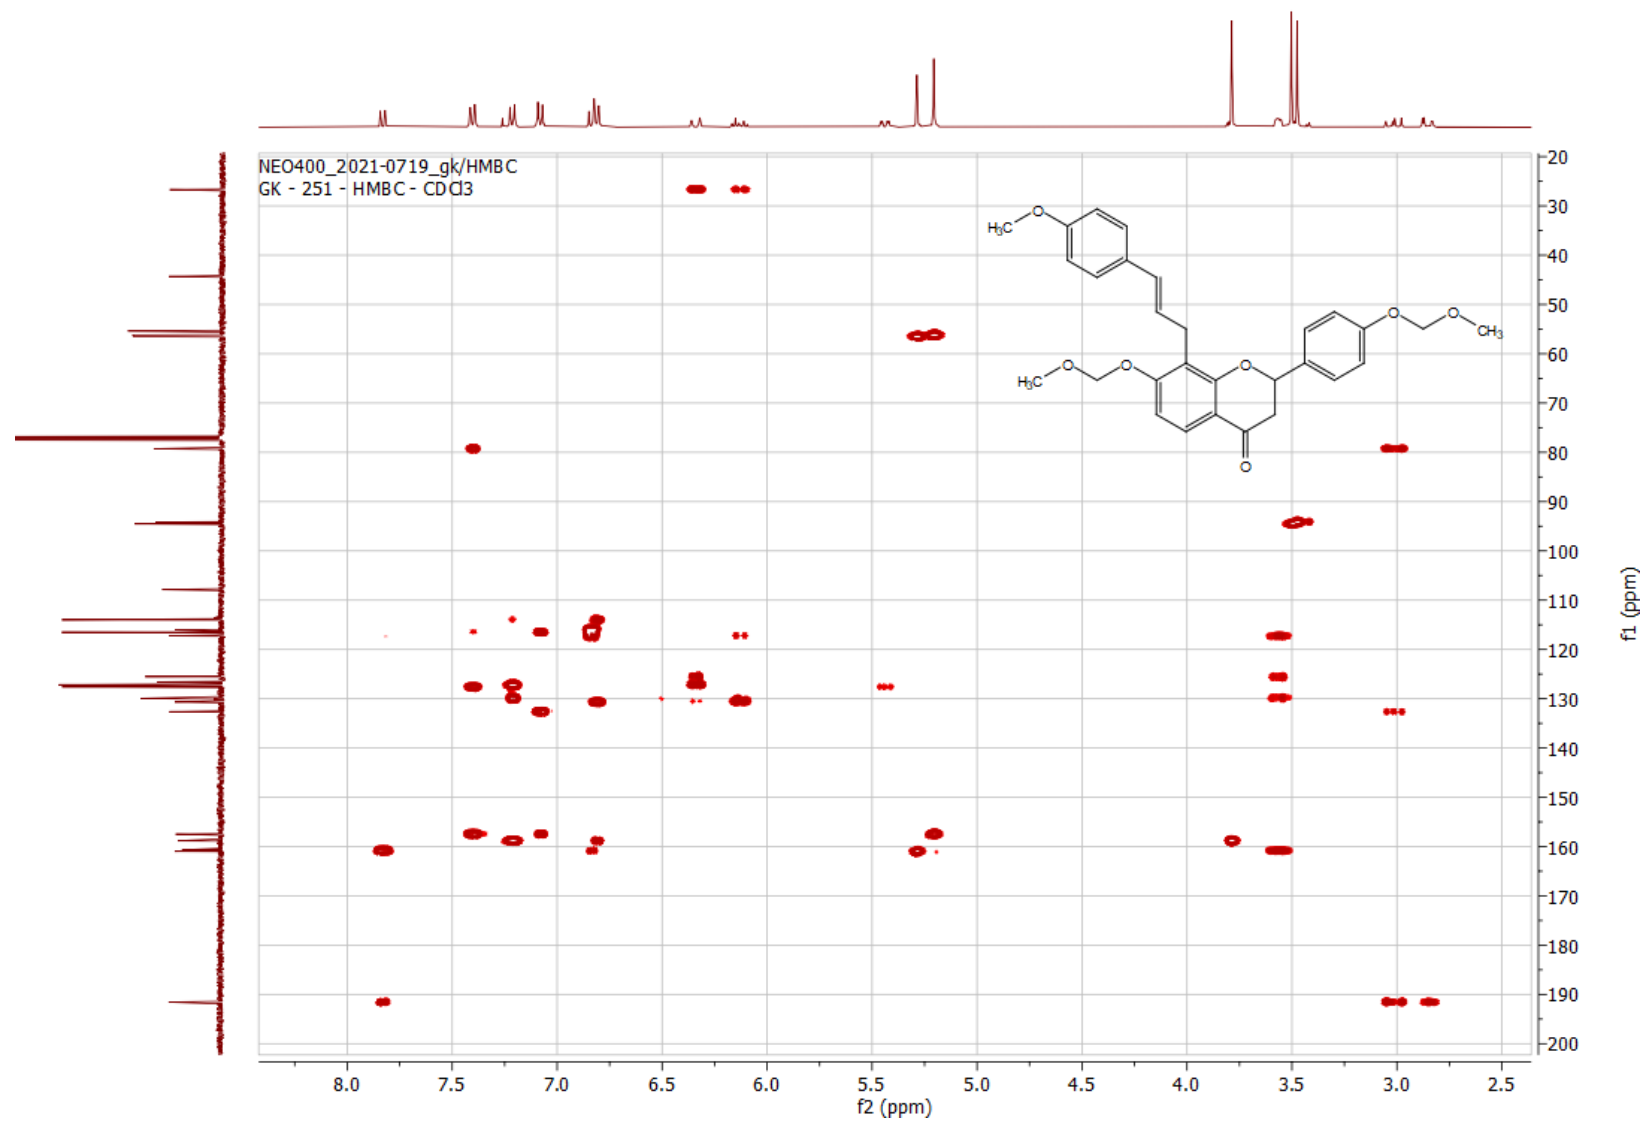

**Figure S164:**  $^1\text{H}$  NMR (400 MHz,  $\text{CDCl}_3$ ) of **16bf**

NEO400\_2021-0909\_gk.10.fid  
GK - 261 - 1H -  $\text{CDCl}_3$

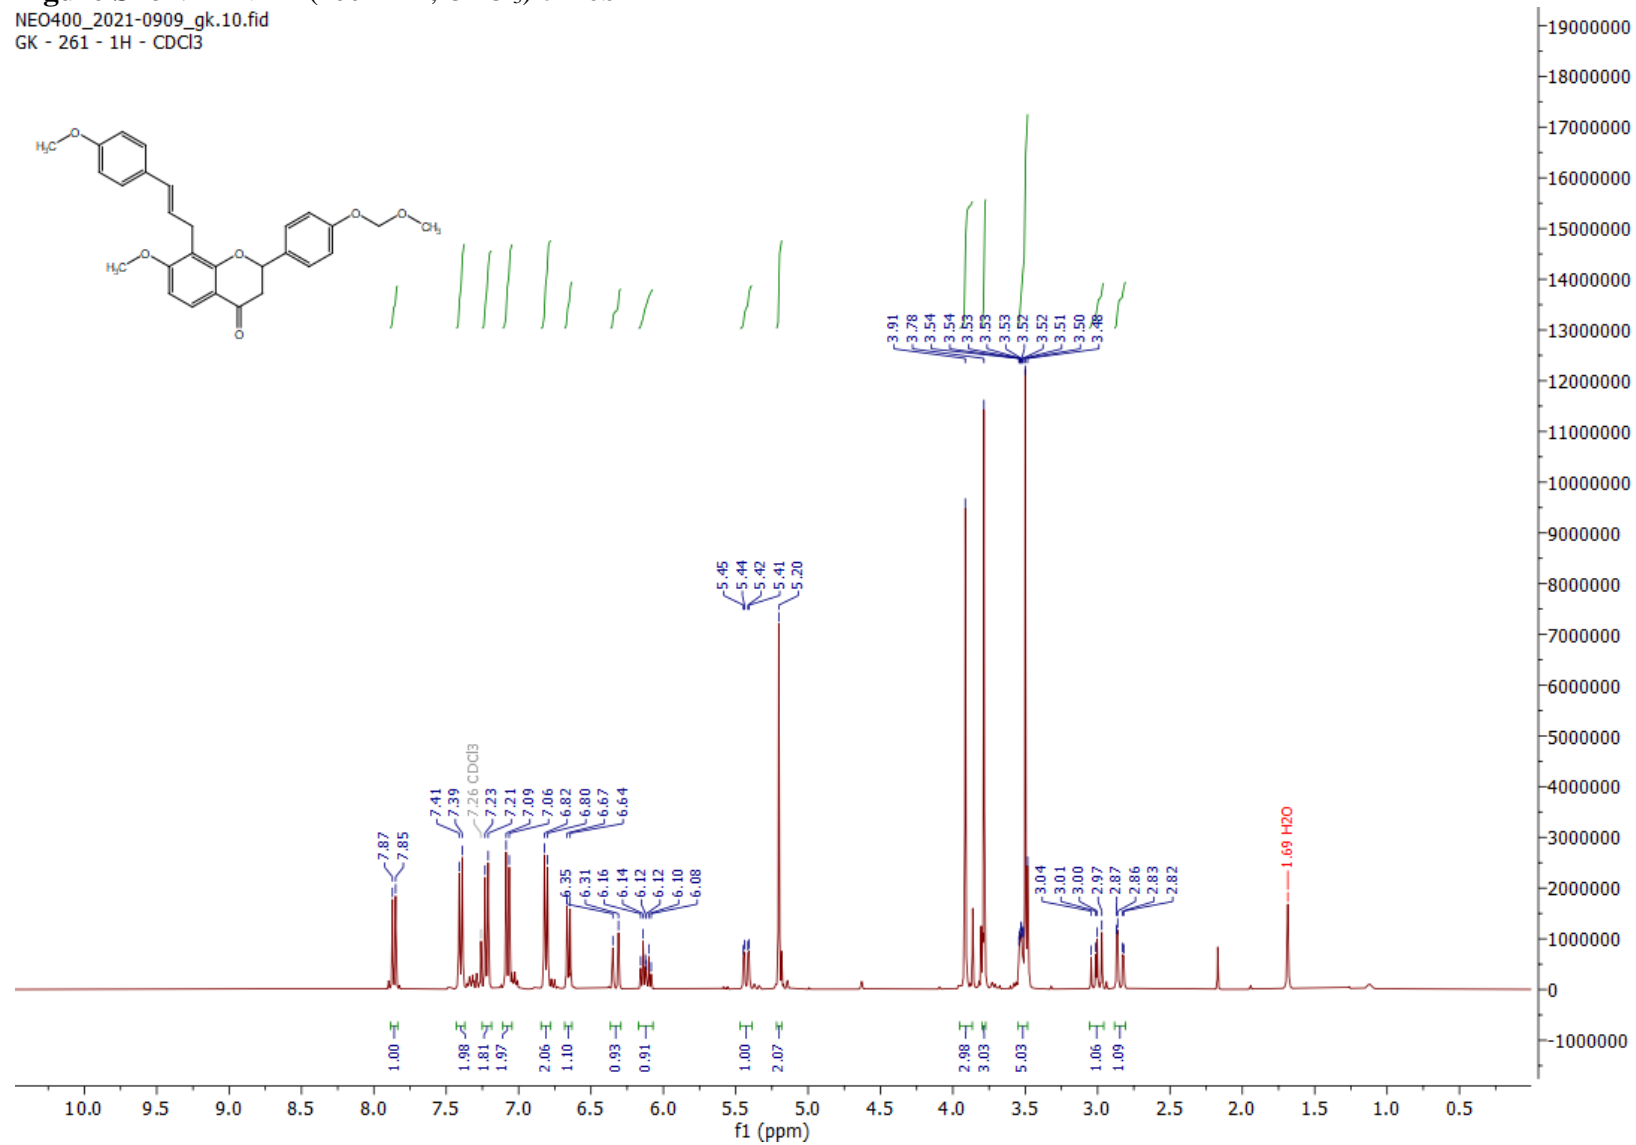

**Figure S165:**  $^{13}\text{C}\{^1\text{H}\}$  NMR (100 MHz,  $\text{CDCl}_3$ ) of **16bf**

NEO400\_2021-0909\_gk.11.fid

GK - 261 - 13C -  $\text{CDCl}_3$

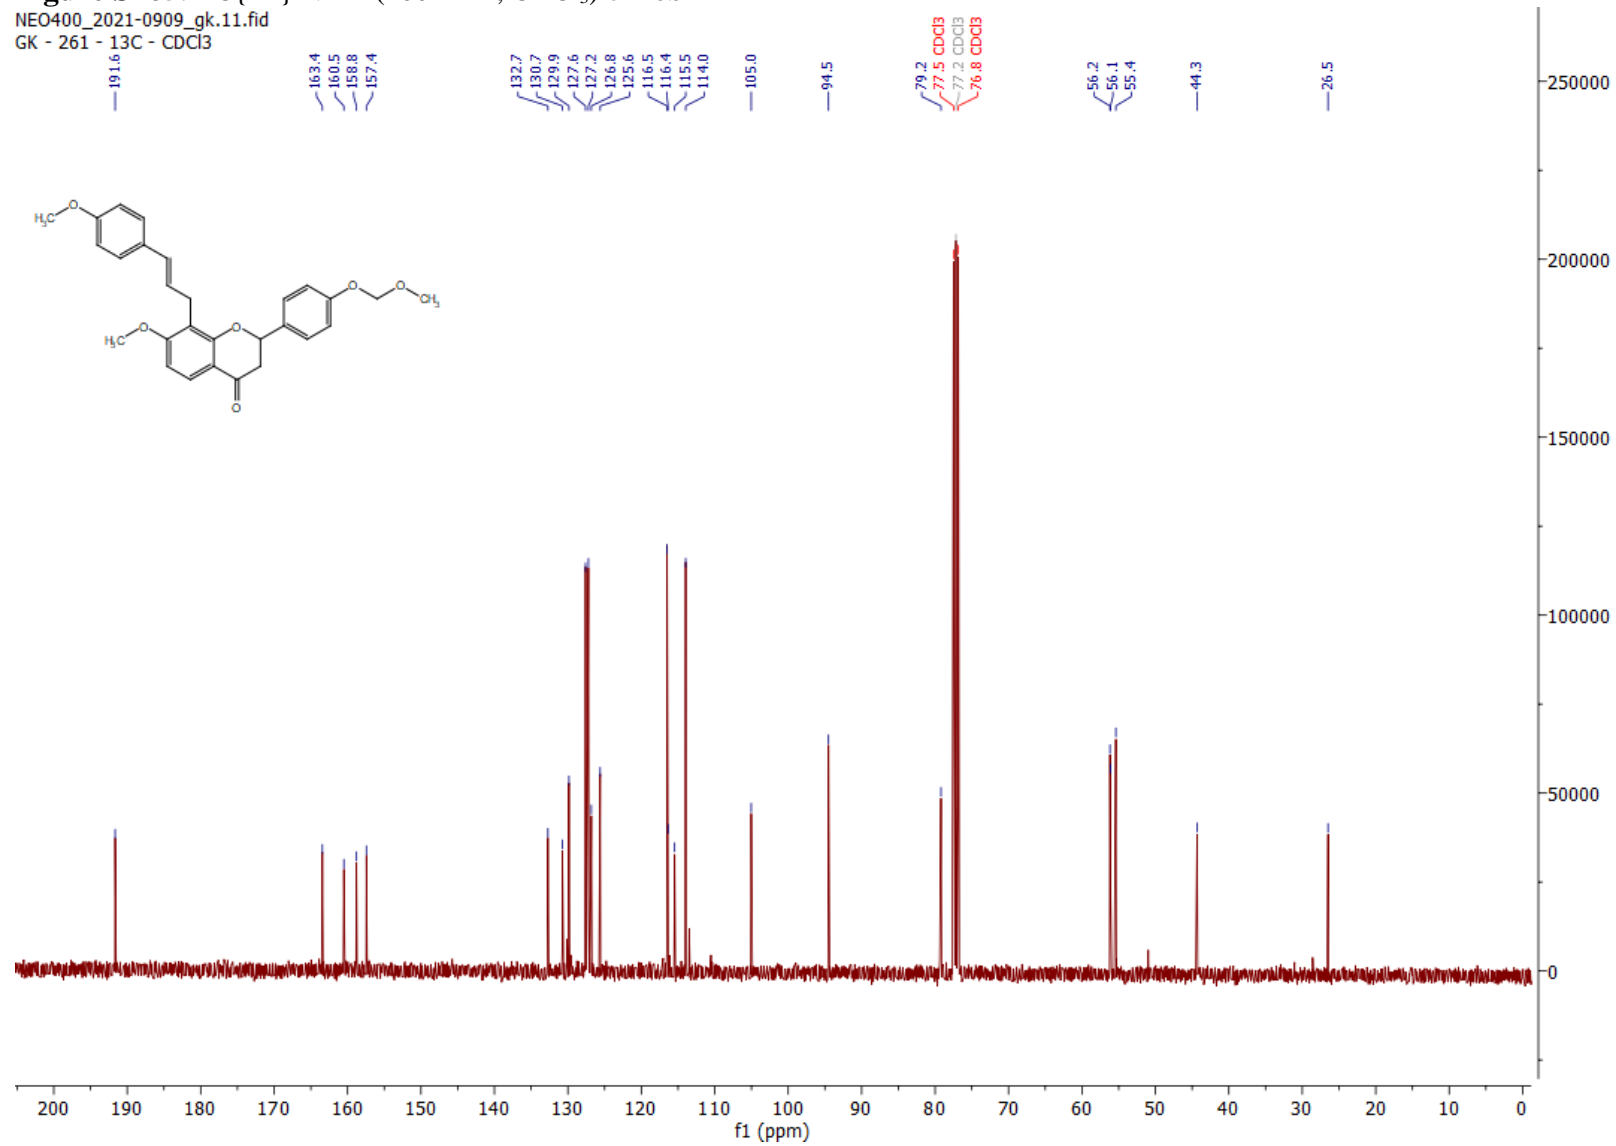



Figure S166: HSQC (400/100 MHz, CDCl<sub>3</sub>) of **16bf**

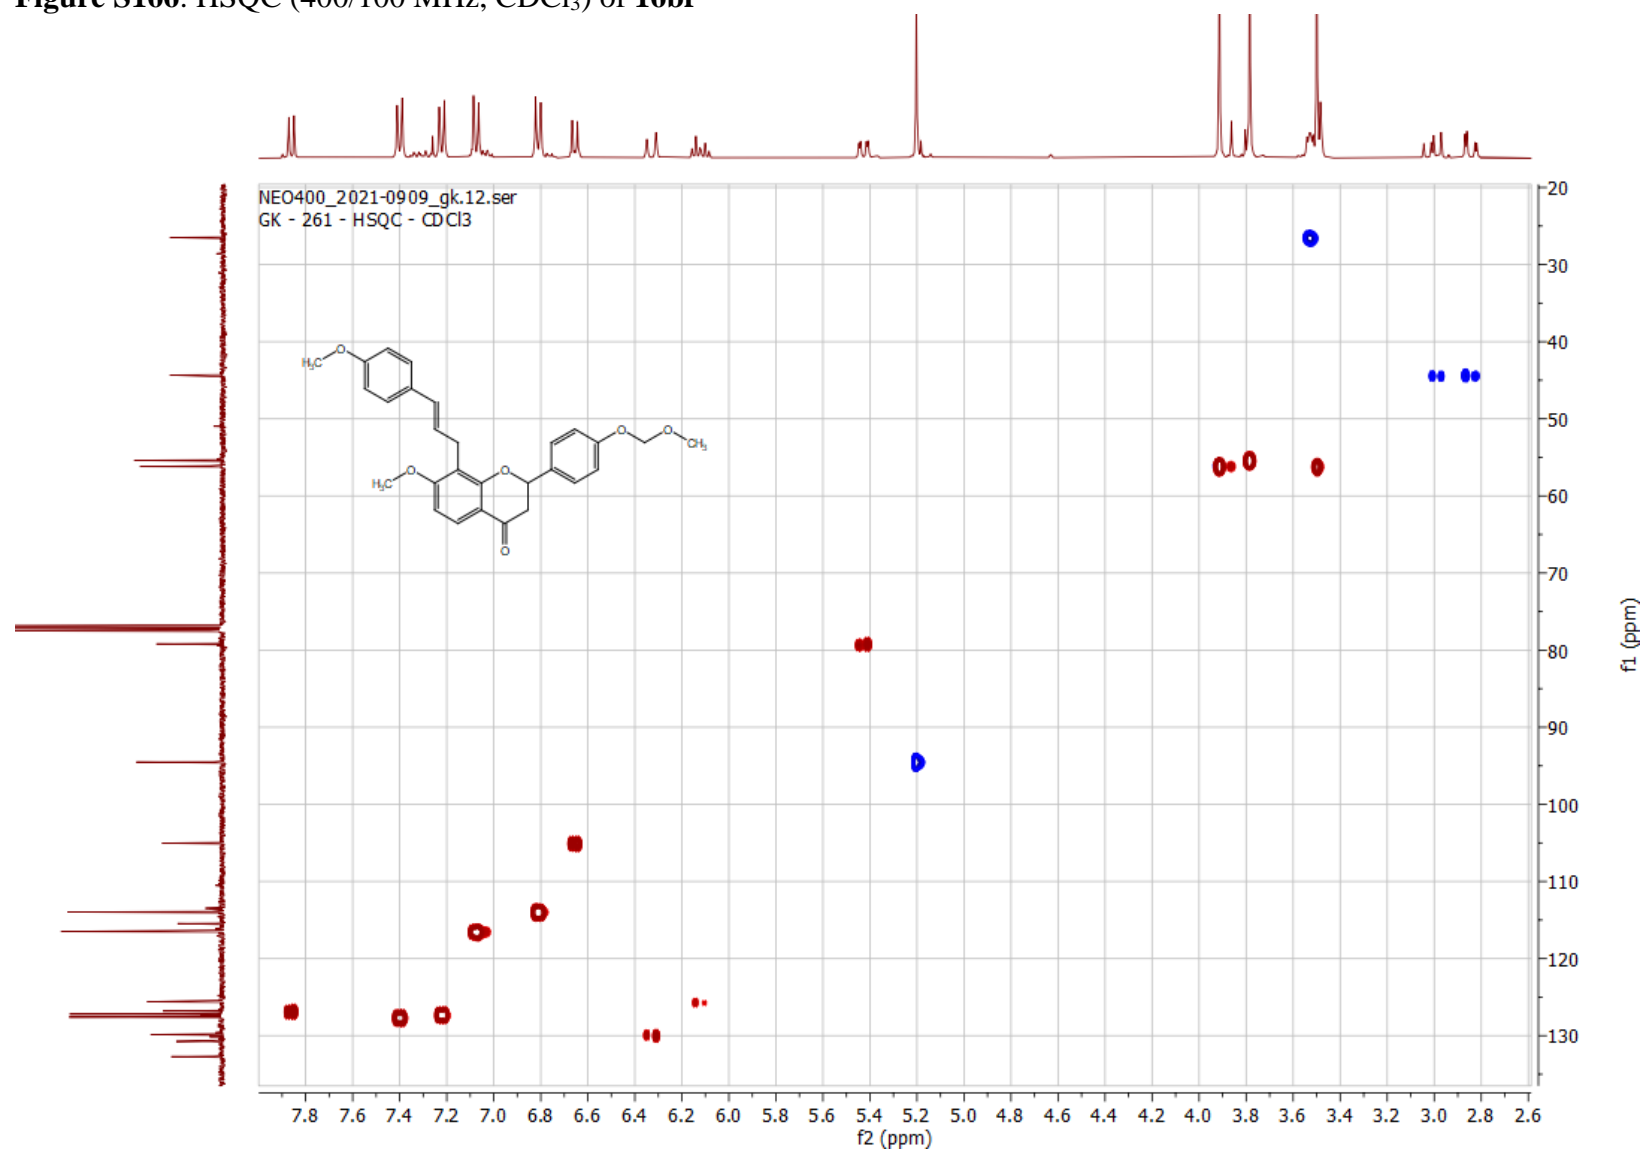

Figure S167: HMBC (400/100 MHz, CDCl<sub>3</sub>) of **16bf**

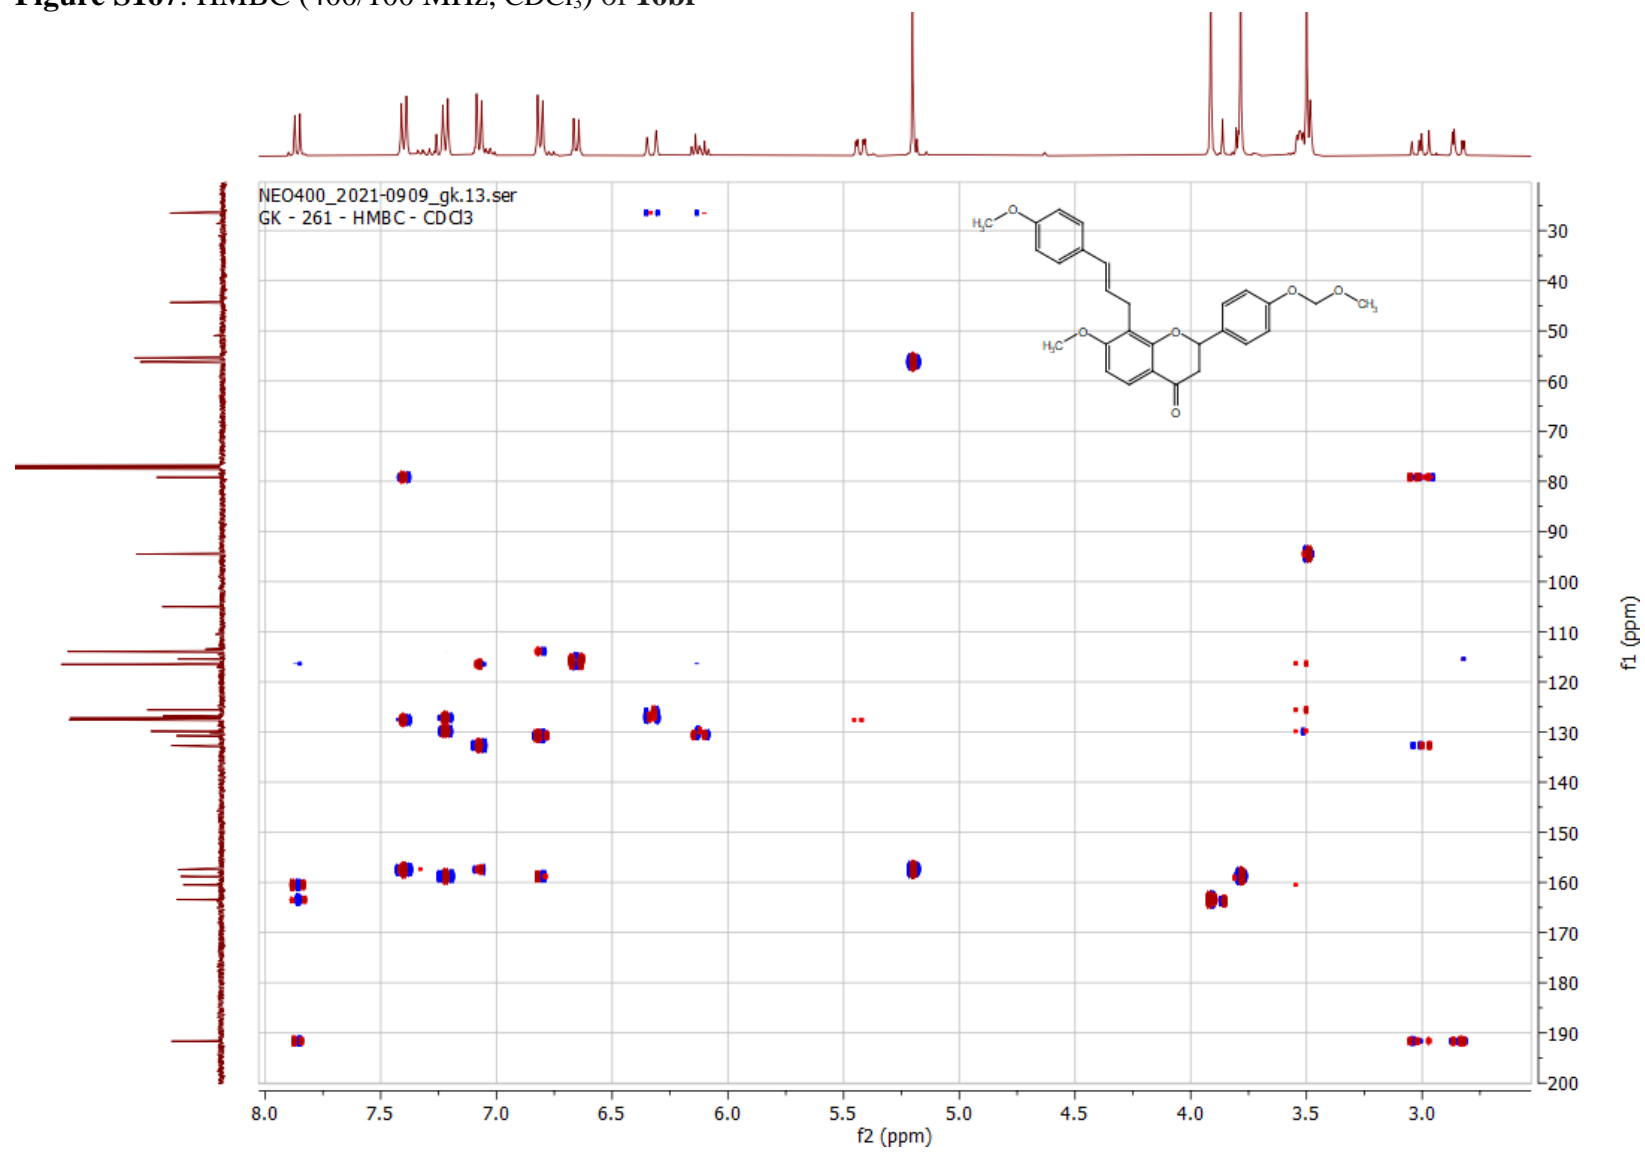

**Figure S168:**  $^1\text{H}$  NMR (400 MHz,  $\text{CDCl}_3$ ) of **16cf**

NEO400\_2021-0721\_gk.30.fid  
GK - 248 -1H -  $\text{CDCl}_3$

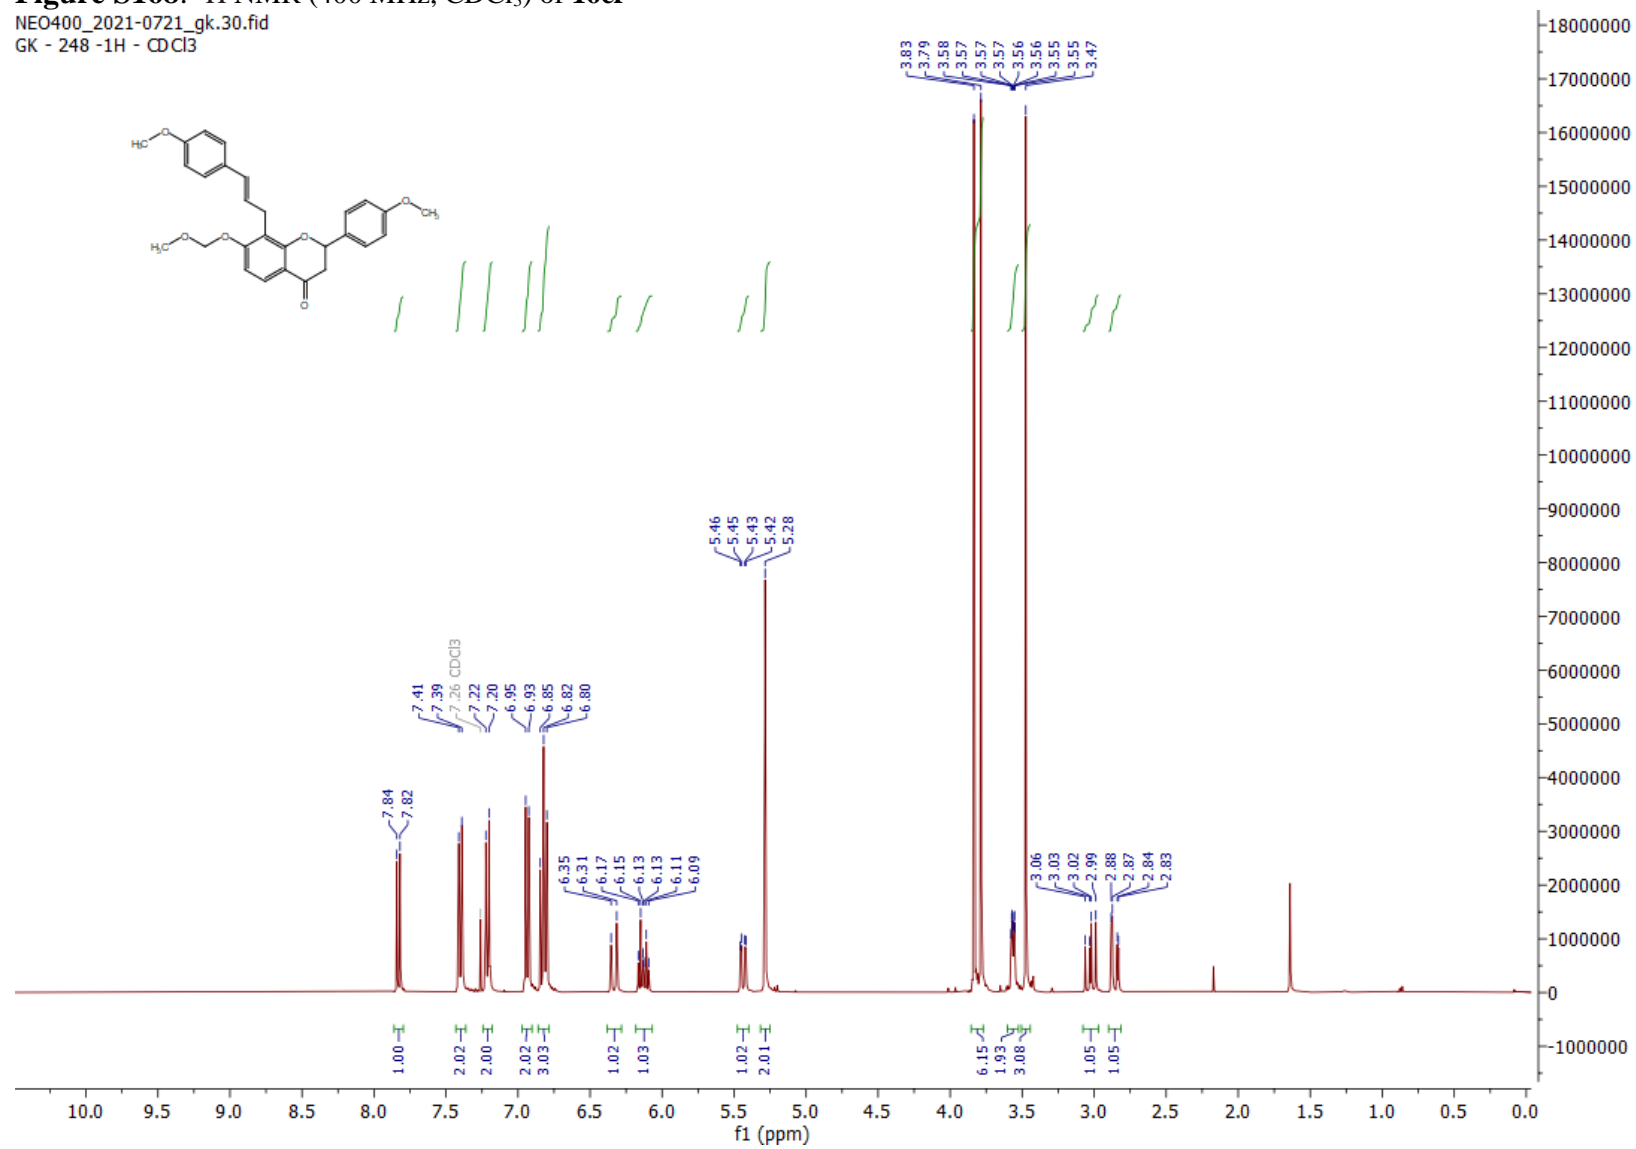

**Figure S169:**  $^{13}\text{C}\{^1\text{H}\}$  NMR (100 MHz,  $\text{CDCl}_3$ ) of **16cf**

NEO400\_2021-0721\_gk.31.fid  
GK - 248 -13C -  $\text{CDCl}_3$

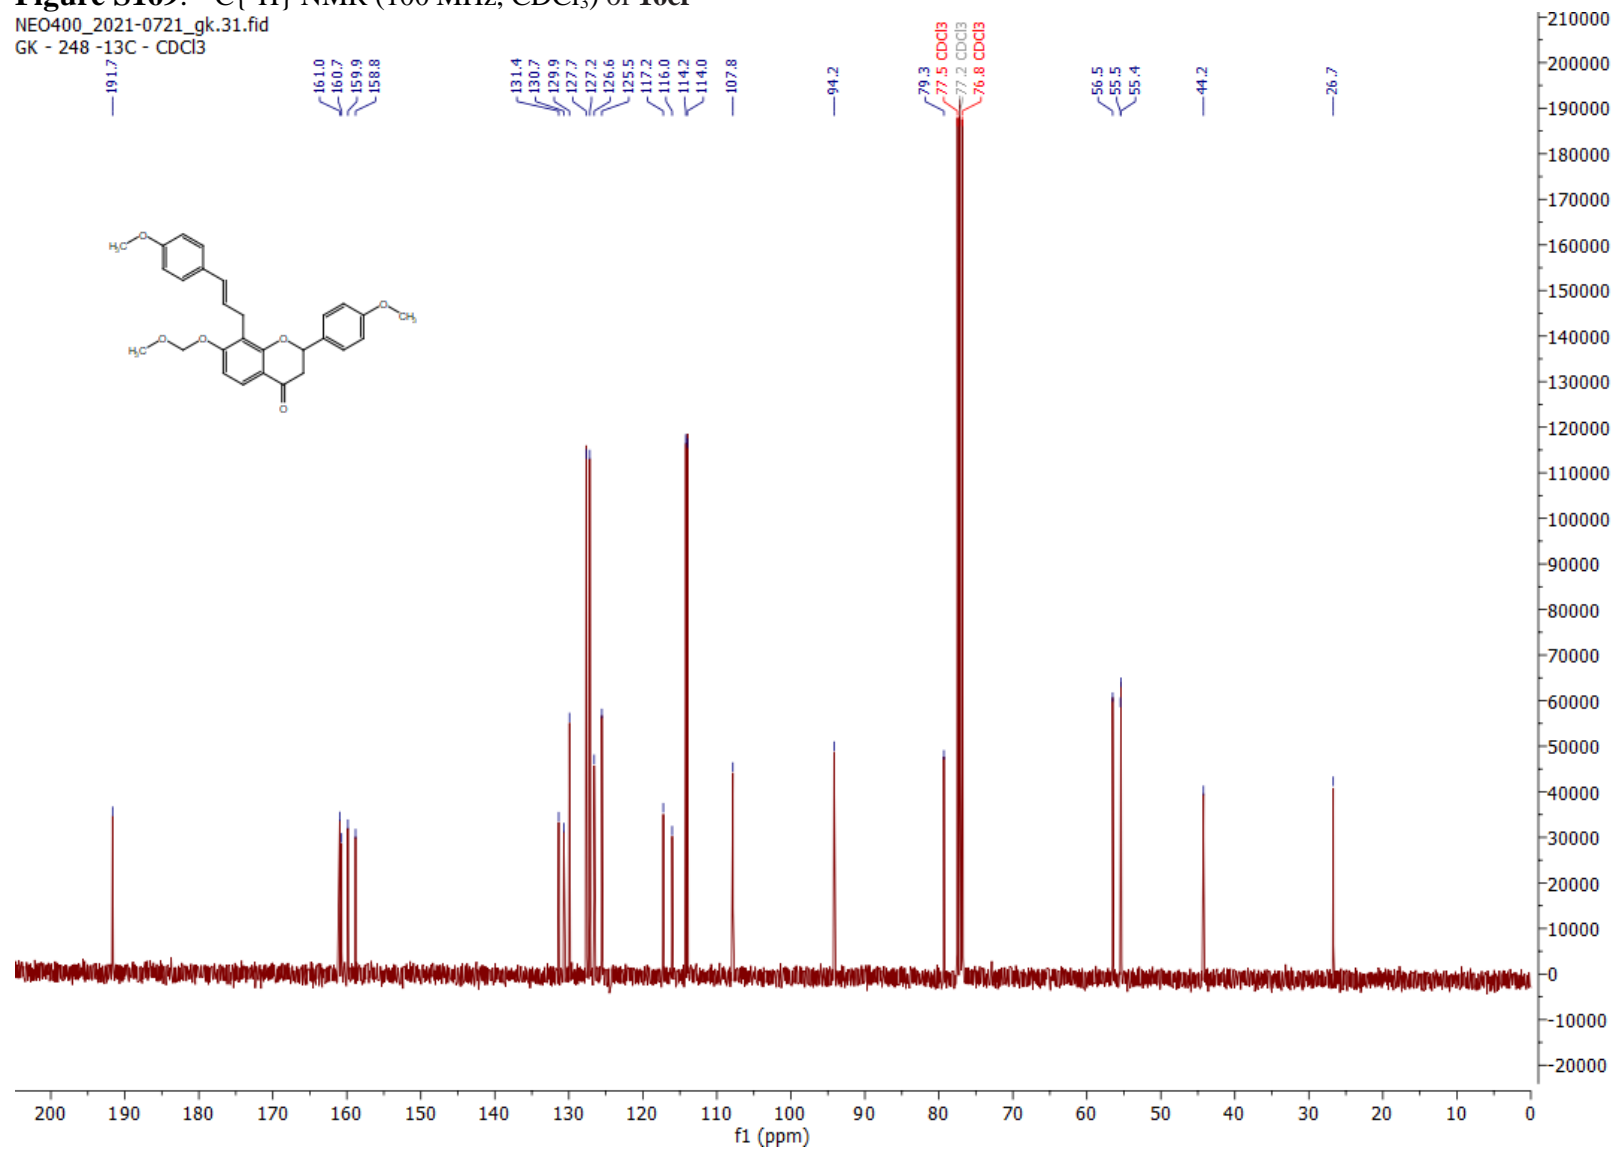

Figure S170: HSQC (400/100 MHz, CDCl<sub>3</sub>) of **16cf**

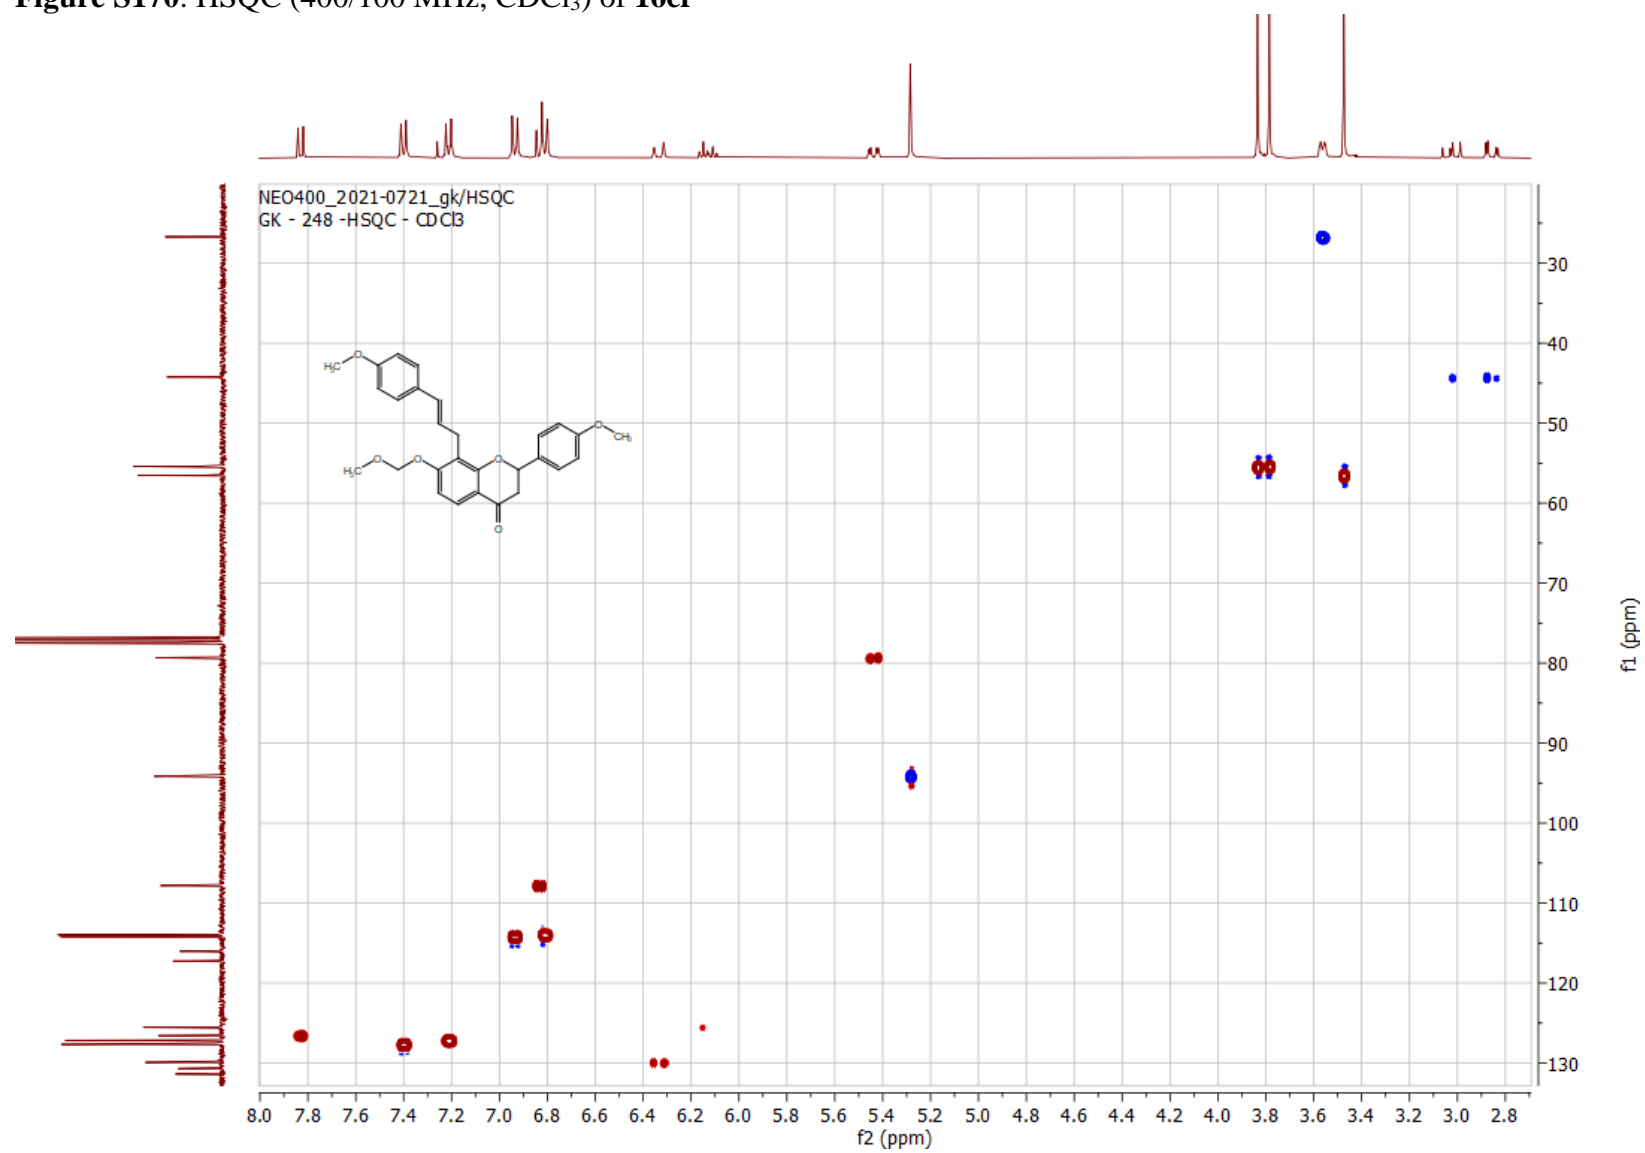

Figure S171: HMBC (400/100 MHz, CDCl<sub>3</sub>) of 16cf

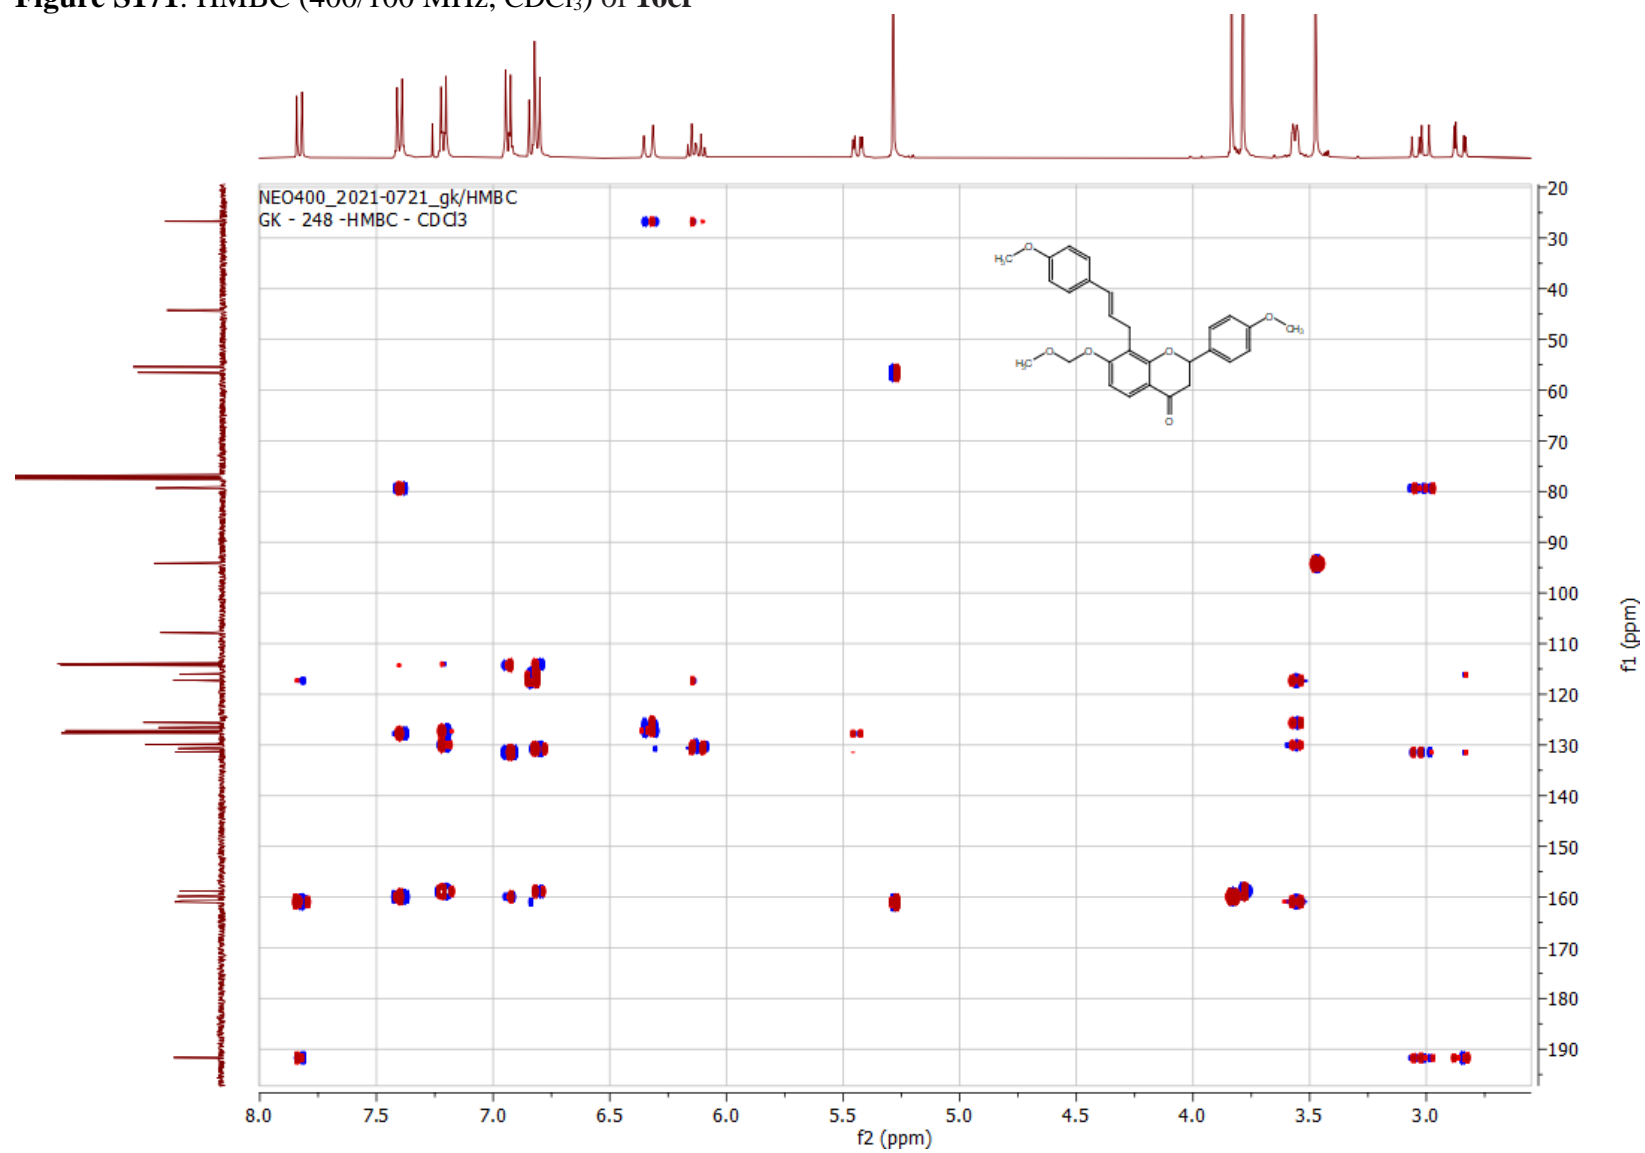

**Figure S172:** NMR-Signal assignment and selected HMBC-couplings for compound **17af**

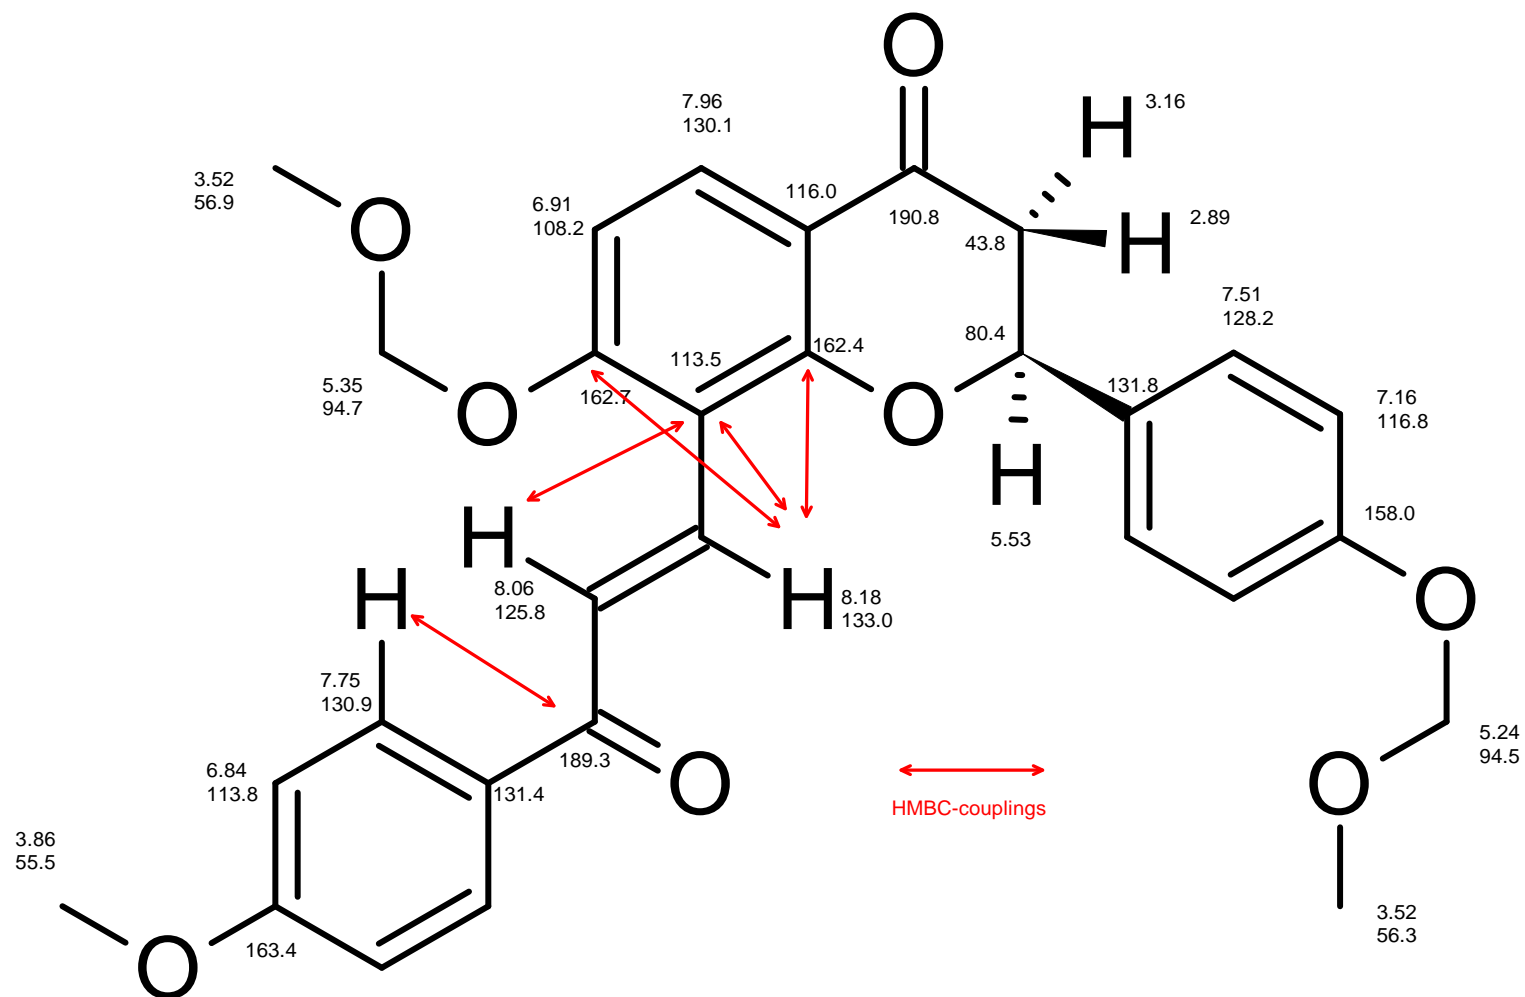

**Figure S173:**  $^1\text{H}$  NMR (400 MHz,  $\text{CDCl}_3$ ) of **17af**

NEO400\_2021-0921\_gk.10.fid

GK - 279 - 1H -  $\text{CDCl}_3$

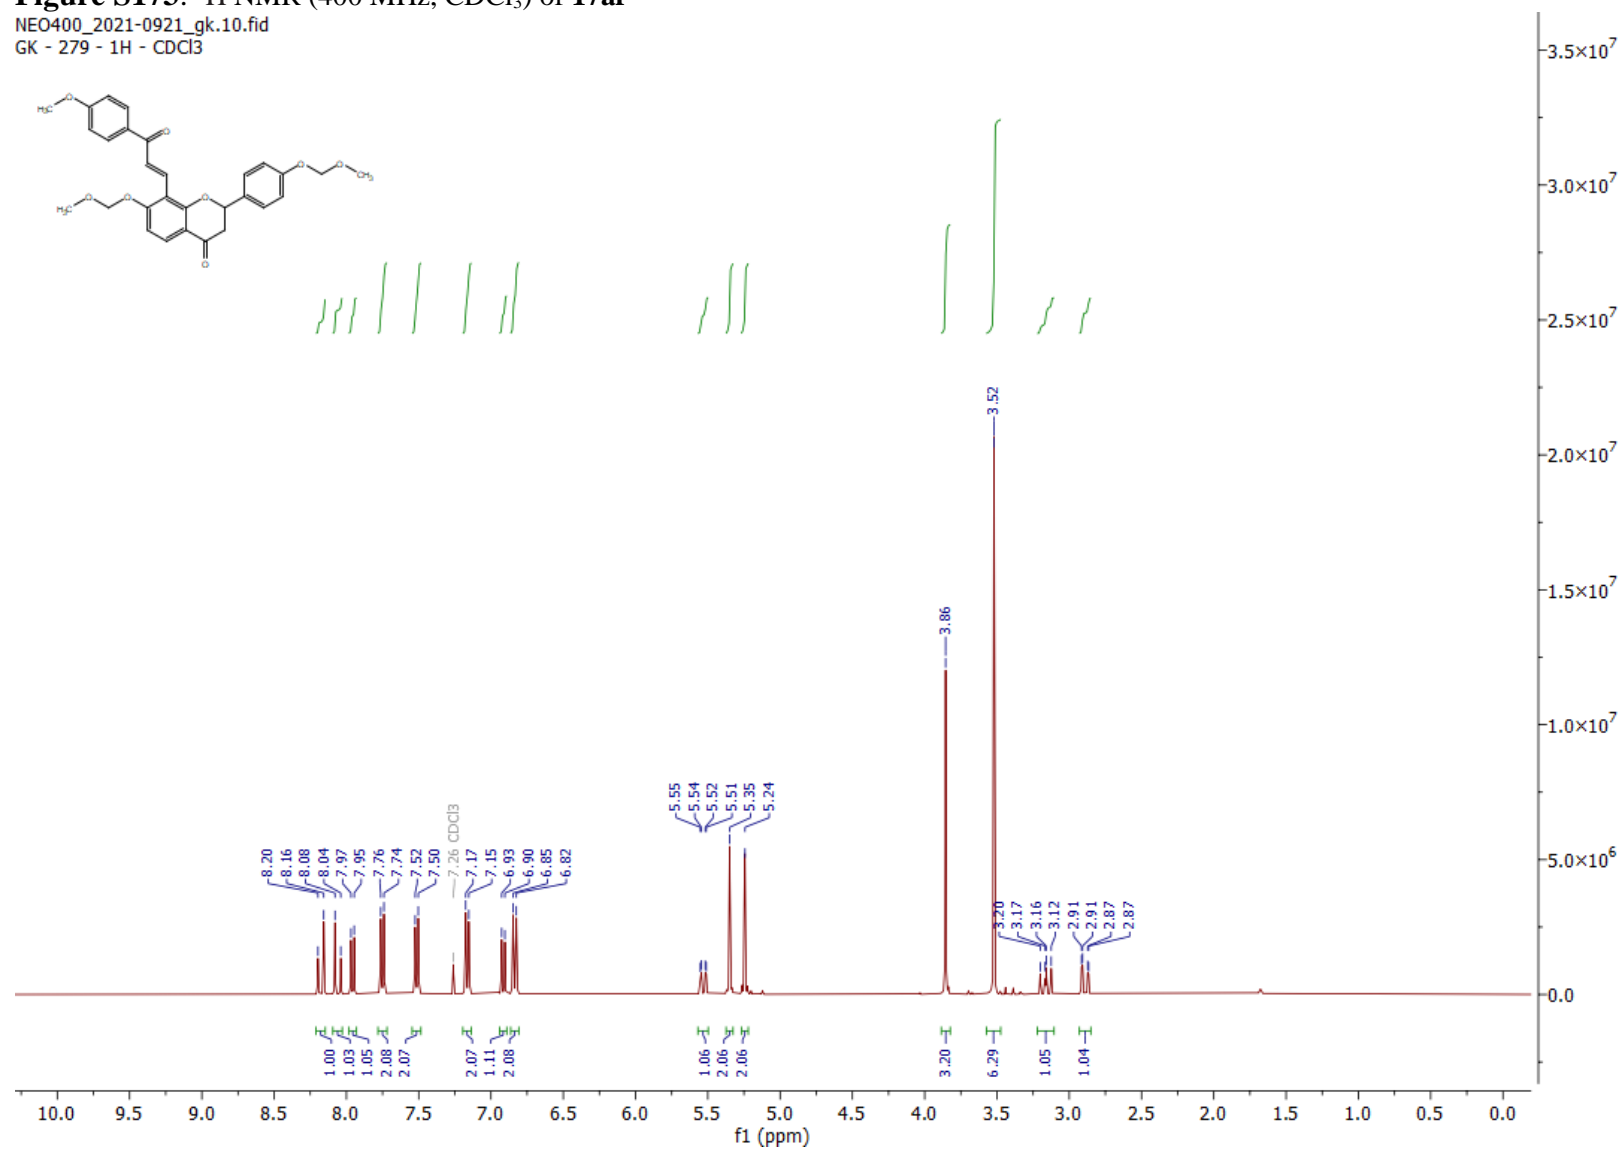



**Figure S174:**  $^{13}\text{C}\{^1\text{H}\}$  NMR (100 MHz,  $\text{CDCl}_3$ ) of **17af**

NEO400\_2021-0921\_gk.11.fid

GK - 279 - 13C -  $\text{CDCl}_3$

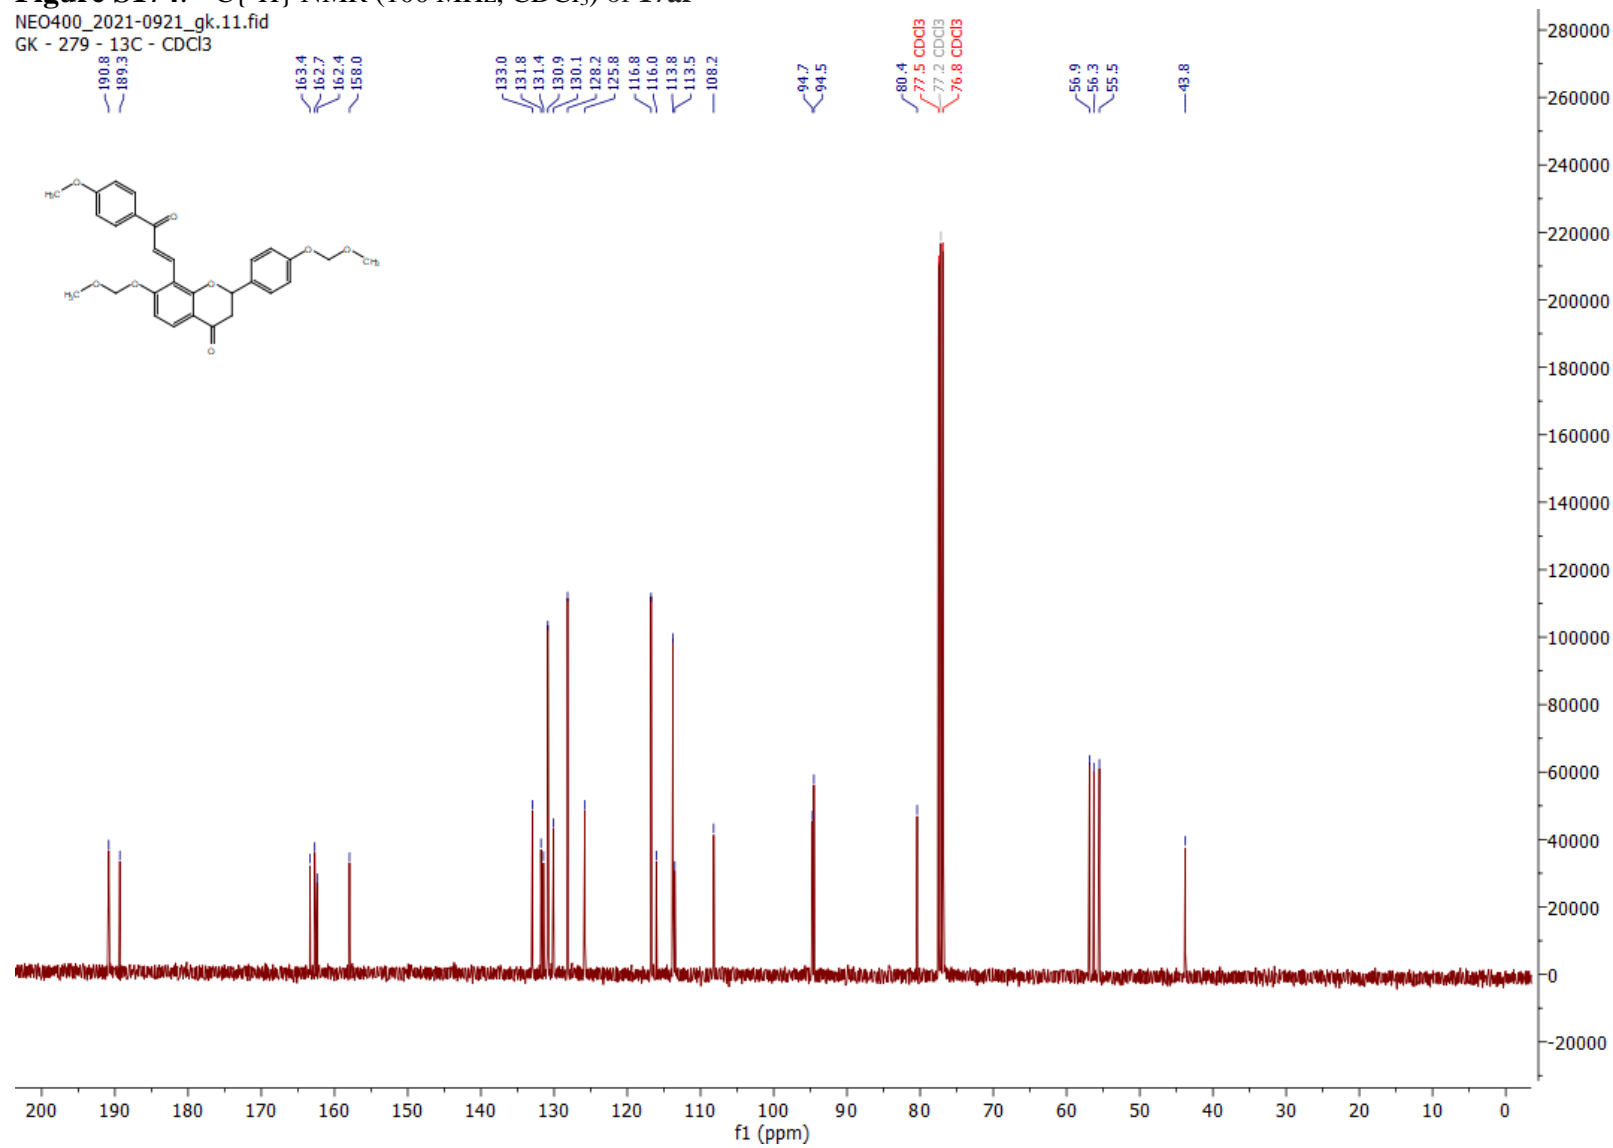

Figure S175: HSQC (400/100 MHz, CDCl<sub>3</sub>) of **17af**

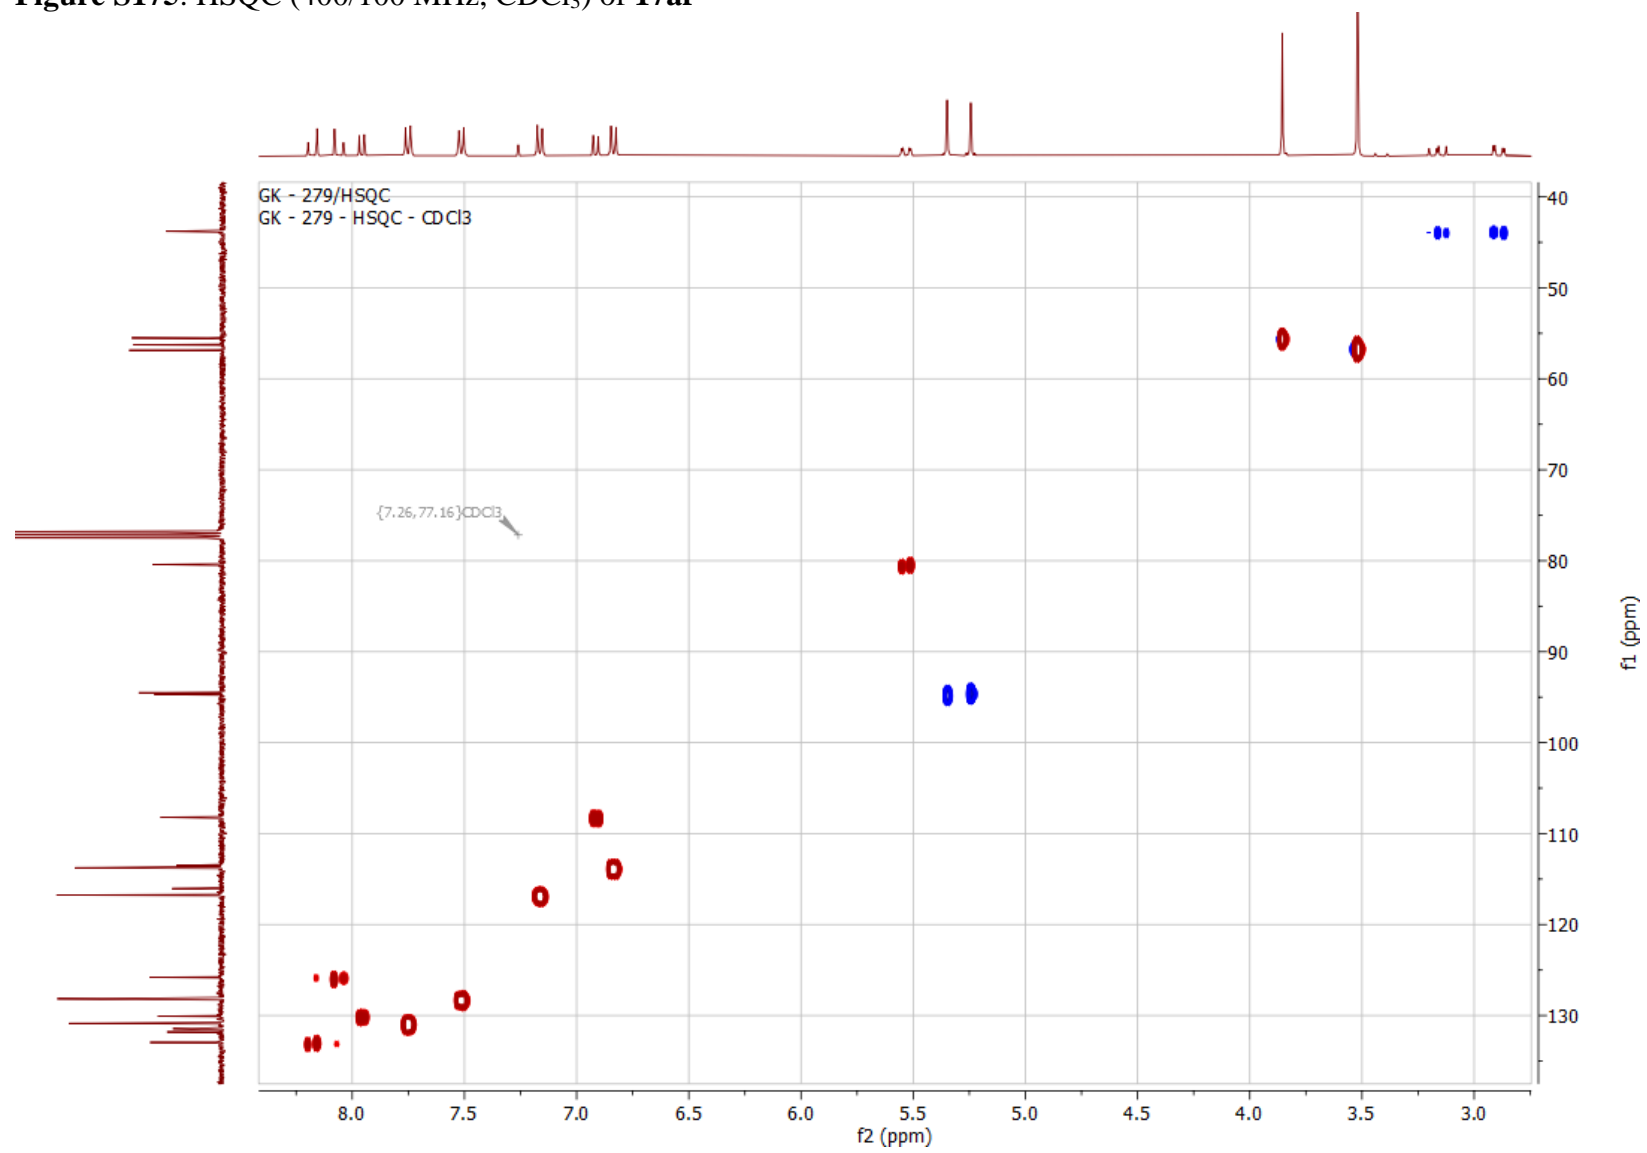

Figure S176: HMBC (400/100 MHz, CDCl<sub>3</sub>) of 17af

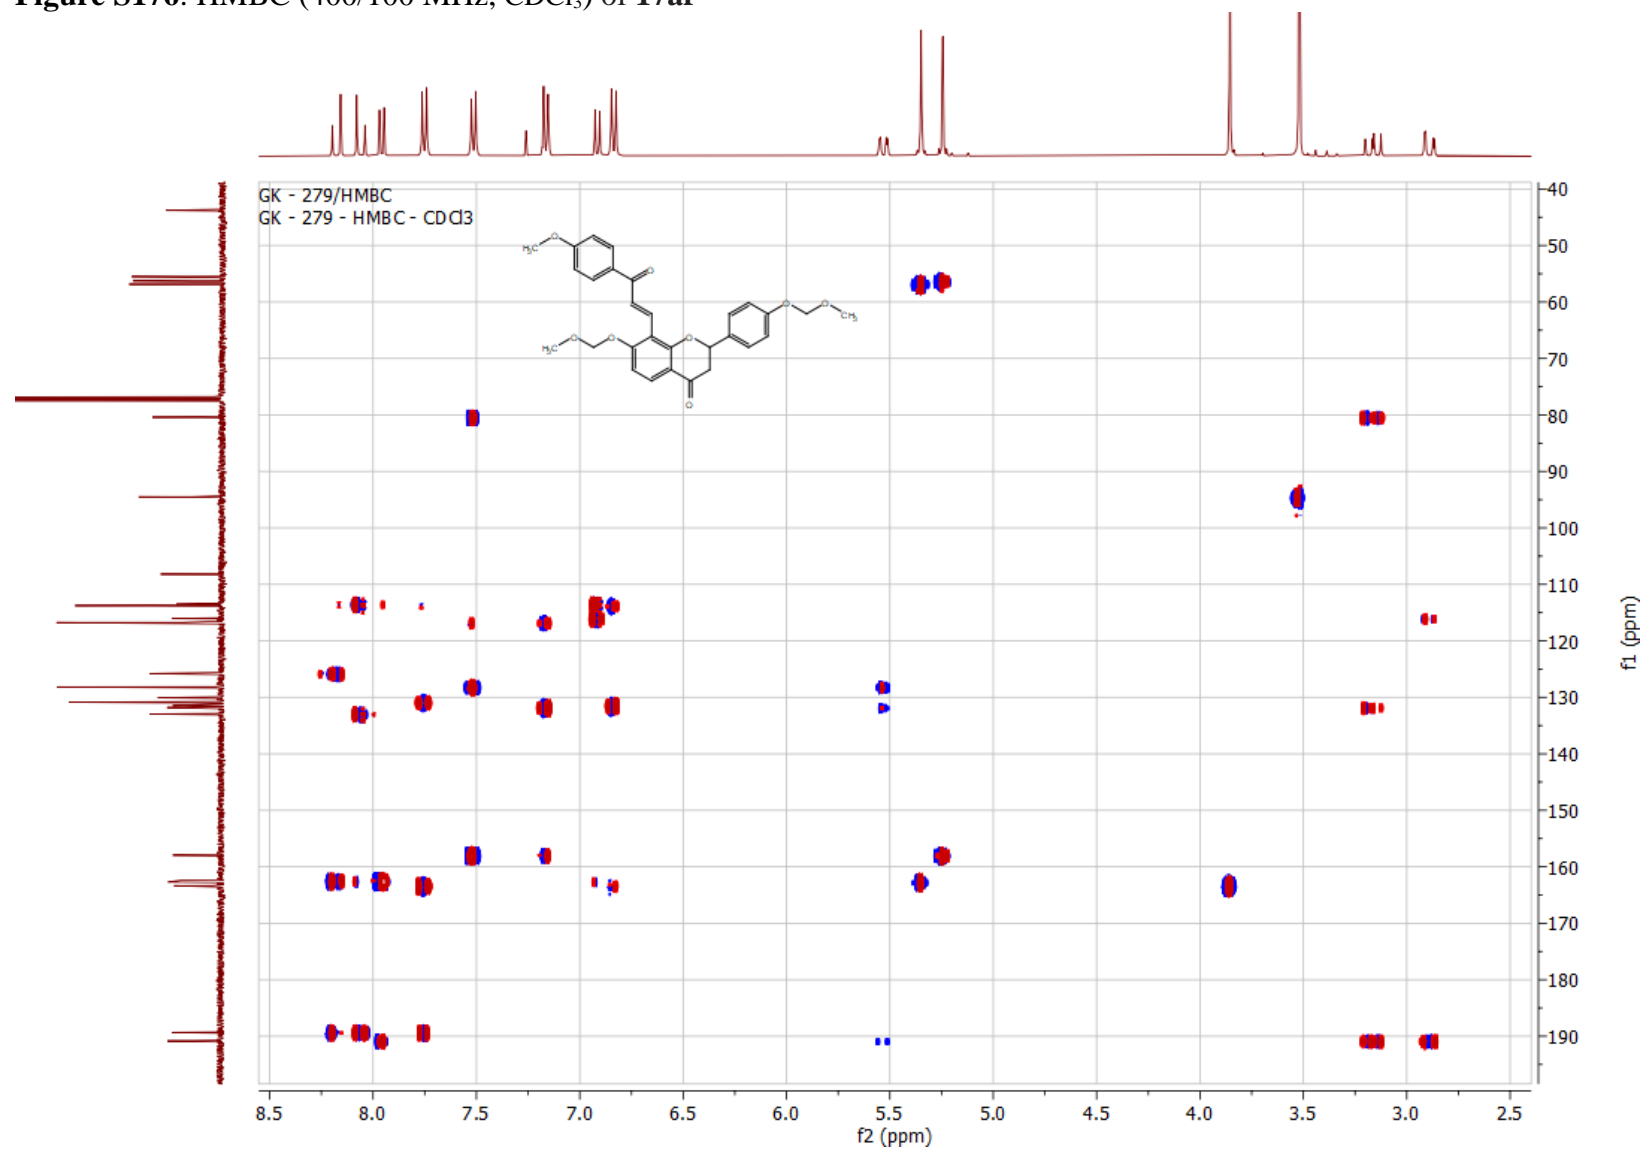

**Figure S177:**  $^1\text{H}$  NMR (400 MHz,  $\text{CDCl}_3$ ) of **17bf**

NEO400\_2021-0930\_gk.10.fid  
GK - 281 - 1H -  $\text{CDCl}_3$

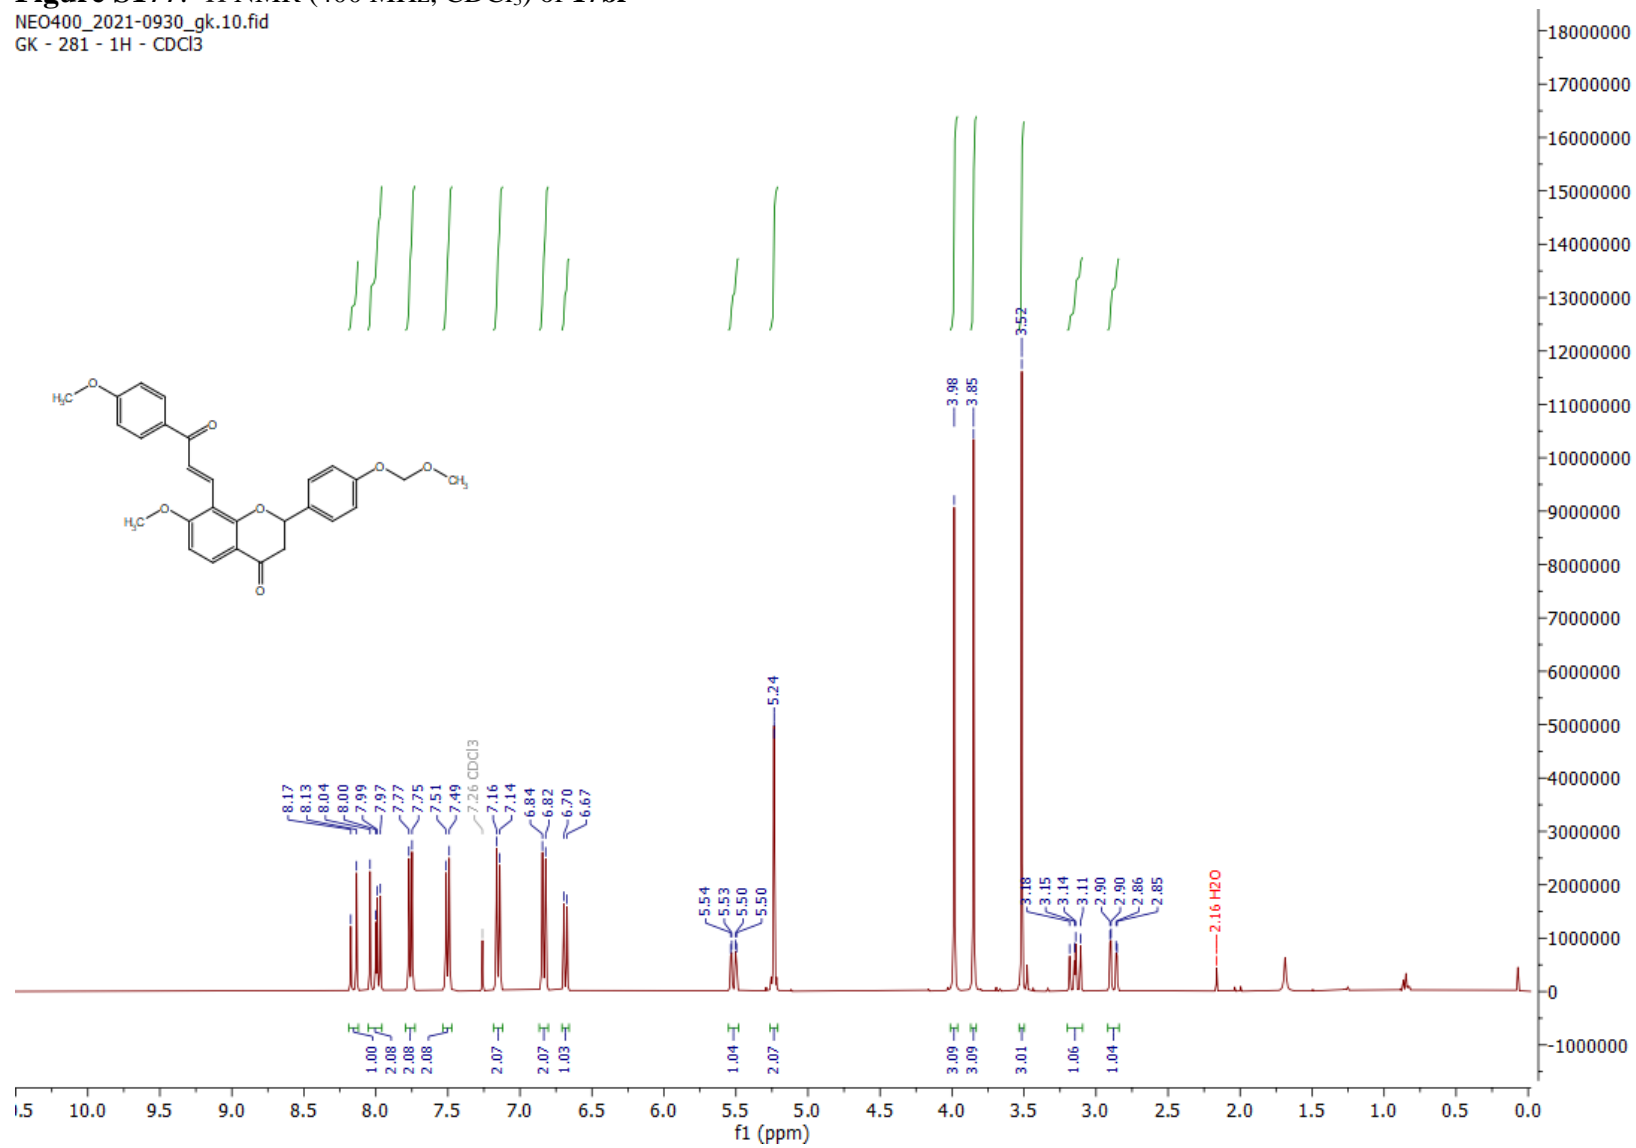

**Figure S178:**  $^{13}\text{C}\{^1\text{H}\}$  NMR (100 MHz,  $\text{CDCl}_3$ ) of **17bf**

NEO400\_2021-0930\_gk.11.fid

GK - 281 -  $^{13}\text{C}$  -  $\text{CDCl}_3$

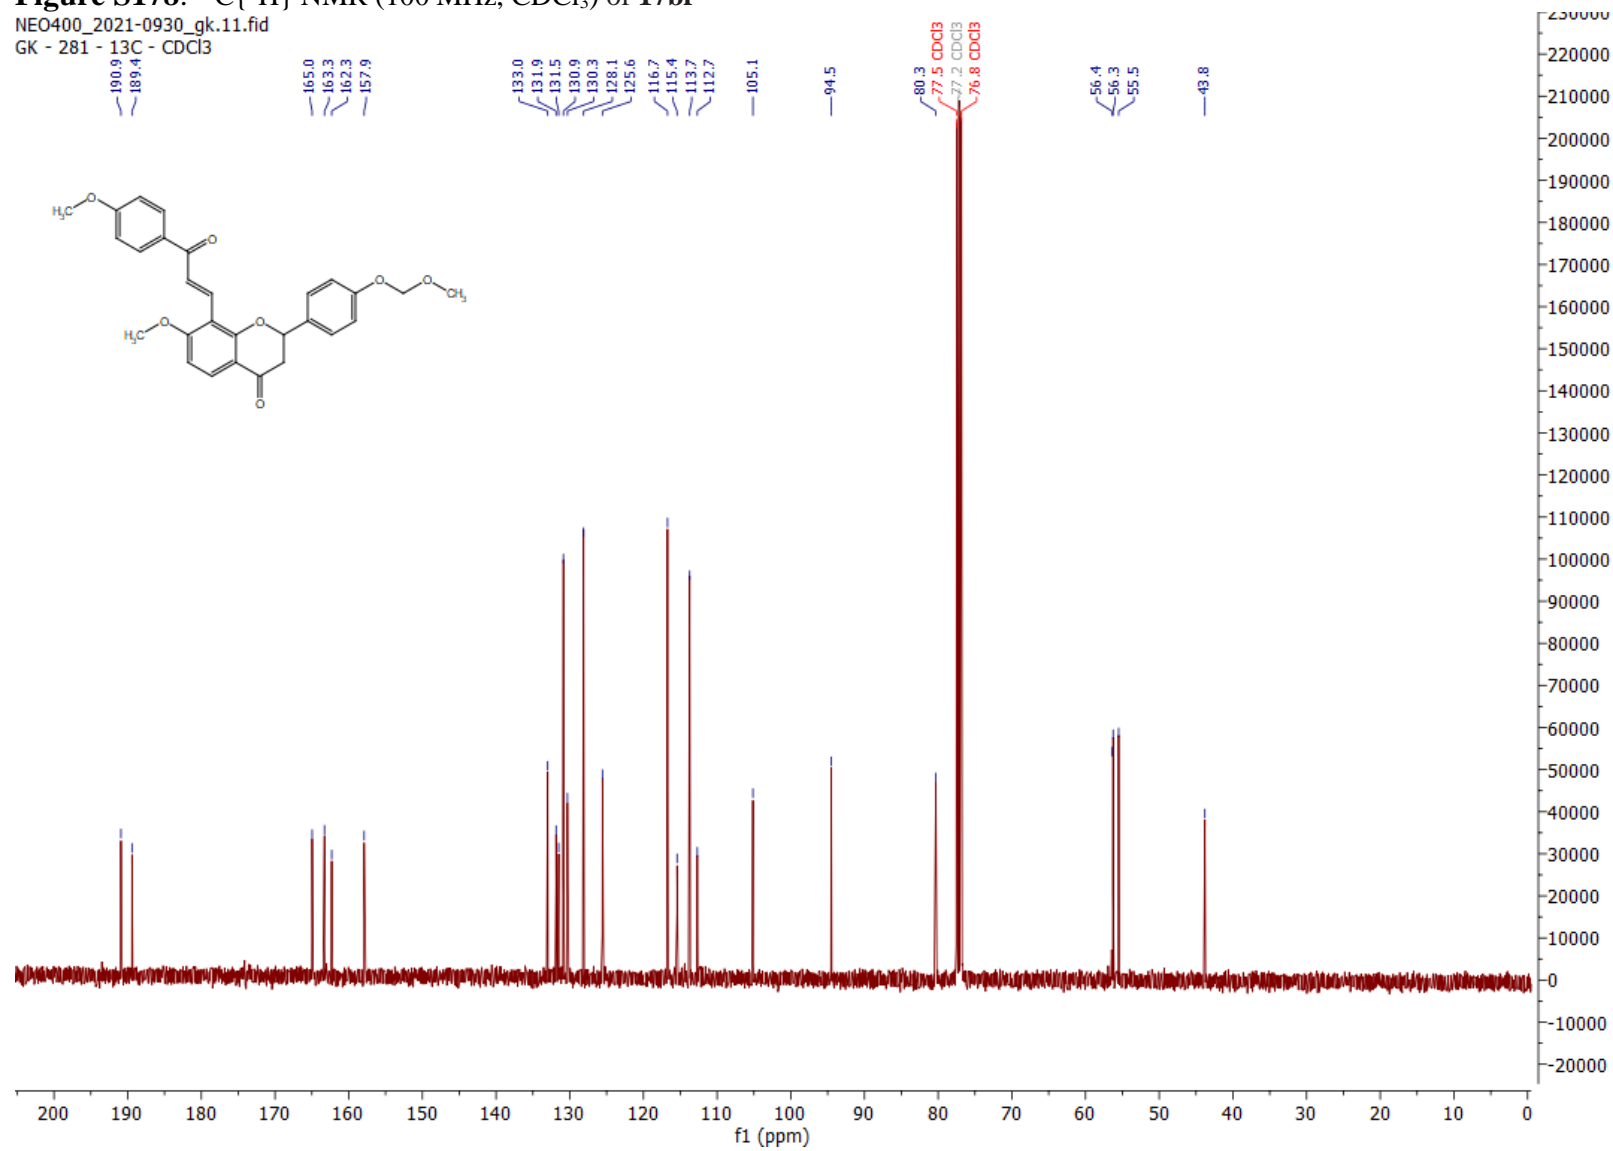

Figure S179: HSQC (400/100 MHz, CDCl<sub>3</sub>) of **17bf**

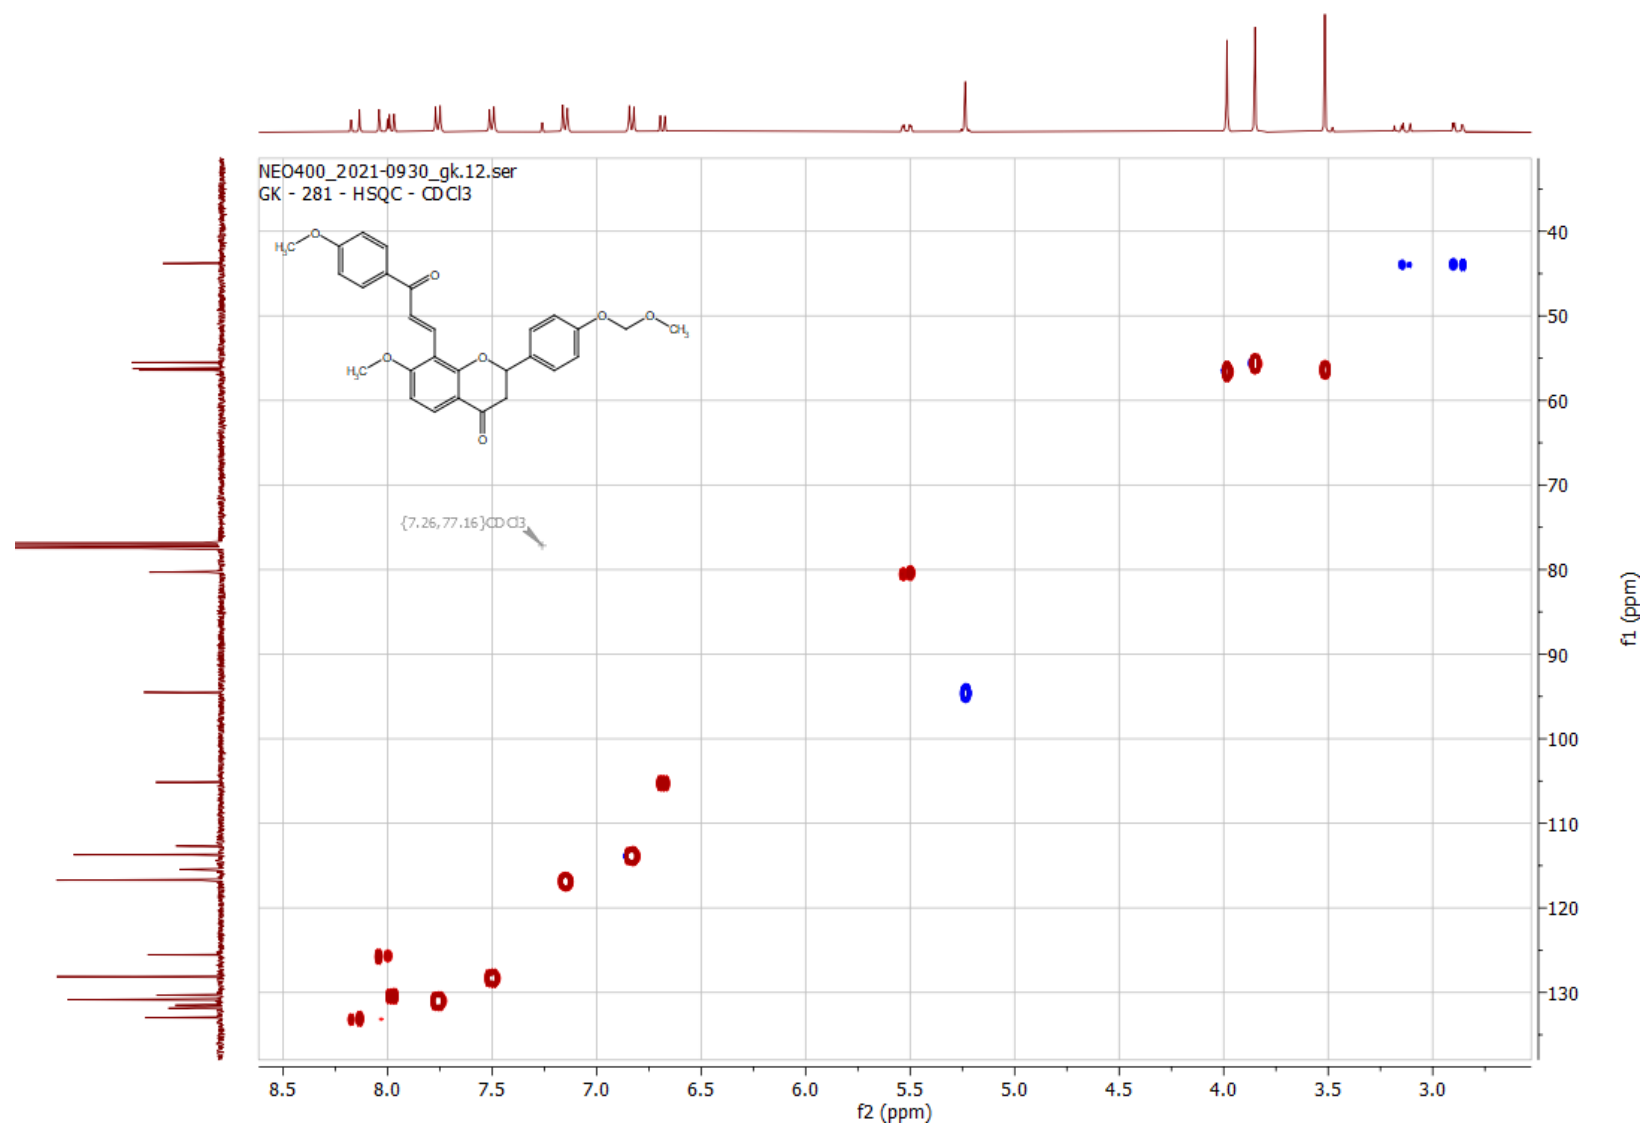

Figure S180: HMBC (400/100 MHz, CDCl<sub>3</sub>) of 17bf

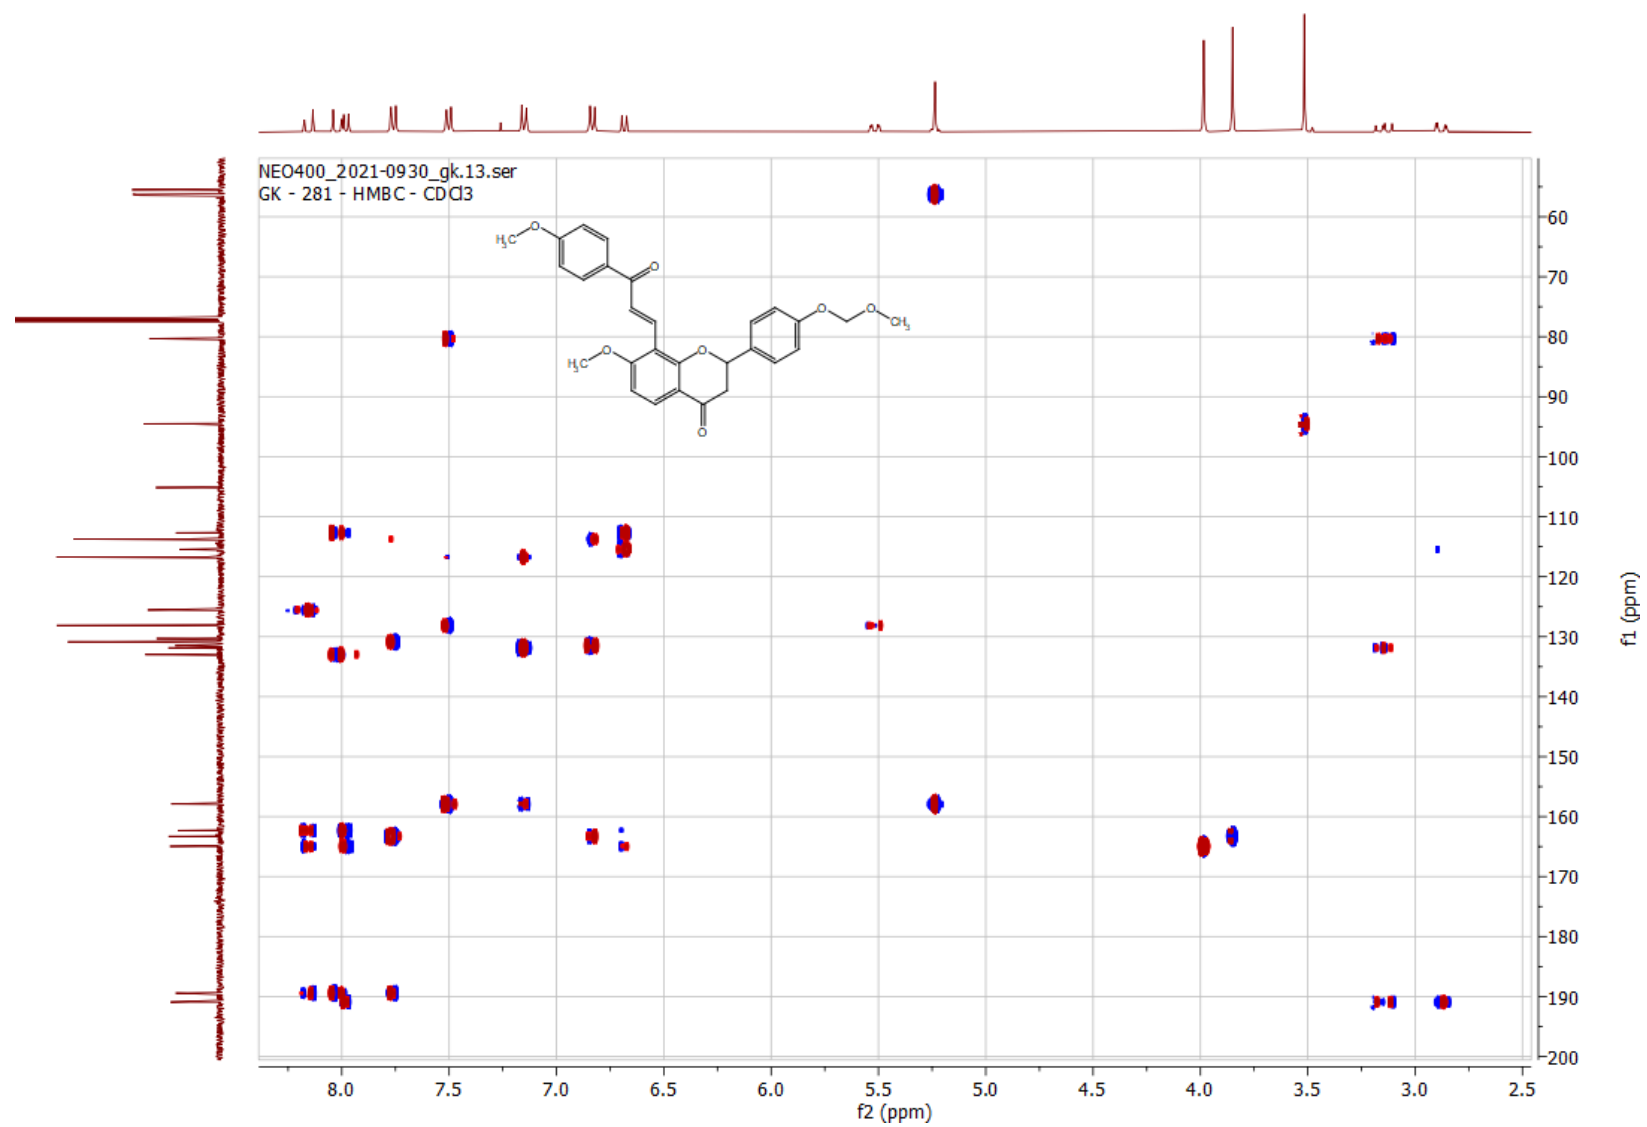

**Figure S181:**  $^1\text{H}$  NMR (400 MHz,  $\text{CDCl}_3$ ) of **17cf**

NEO400\_2021-1013\_gk.10.fid  
GK - 287 -1H - $\text{CDCl}_3$

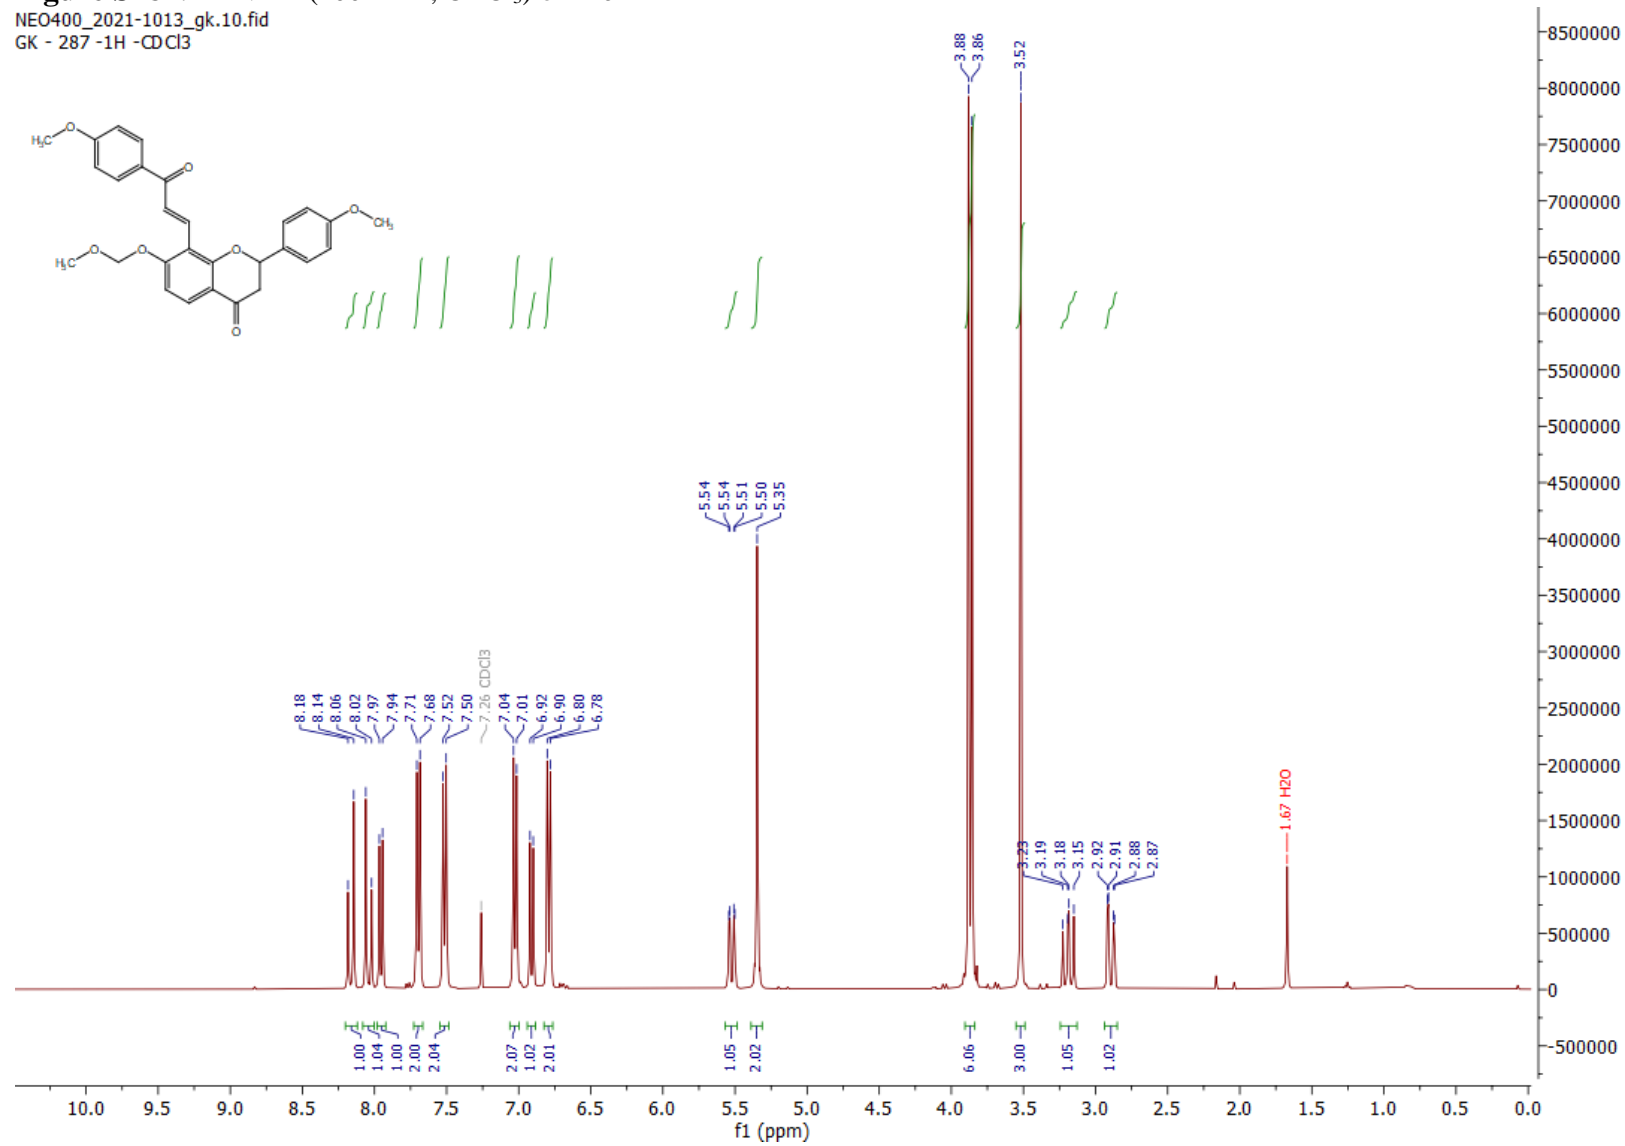



**Figure S182:**  $^{13}\text{C}\{^1\text{H}\}$  NMR (100 MHz,  $\text{CDCl}_3$ ) of **17cf**

NEO400\_2021-1013\_gk.11.fid  
GK - 287 -13C - $\text{CDCl}_3$

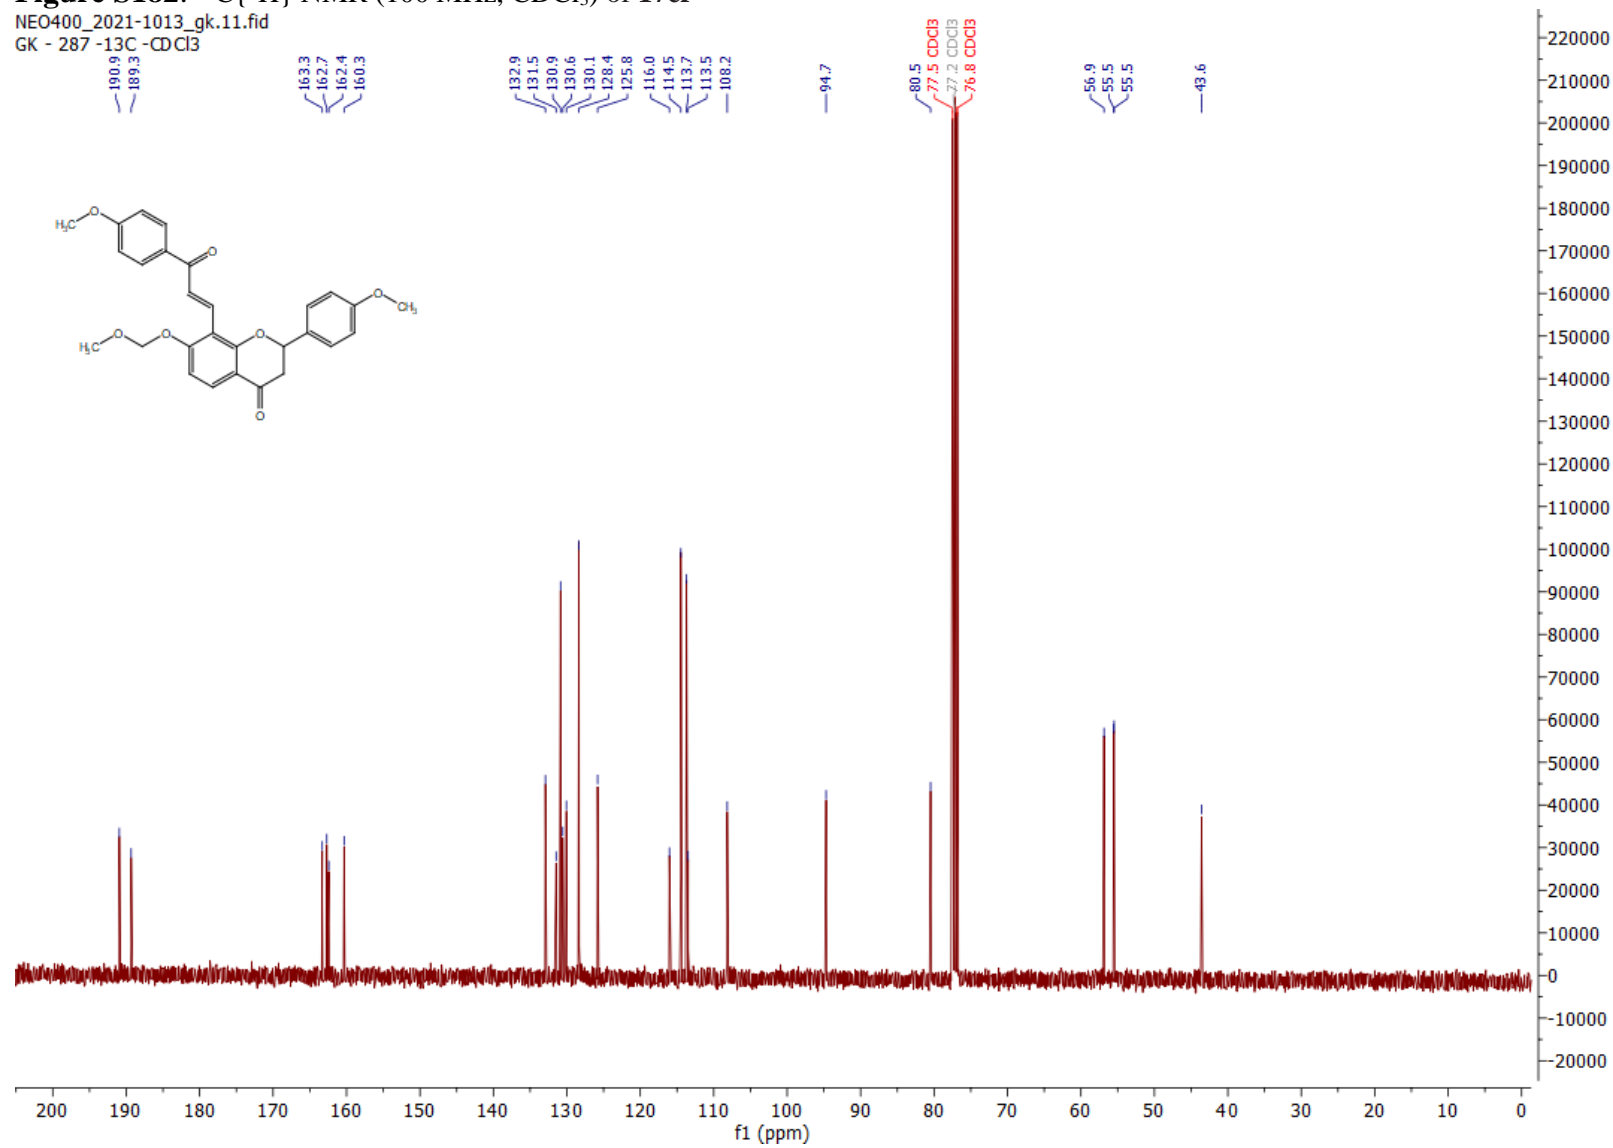

Figure S183: HSQC (400/100 MHz, CDCl<sub>3</sub>) of **17cf**

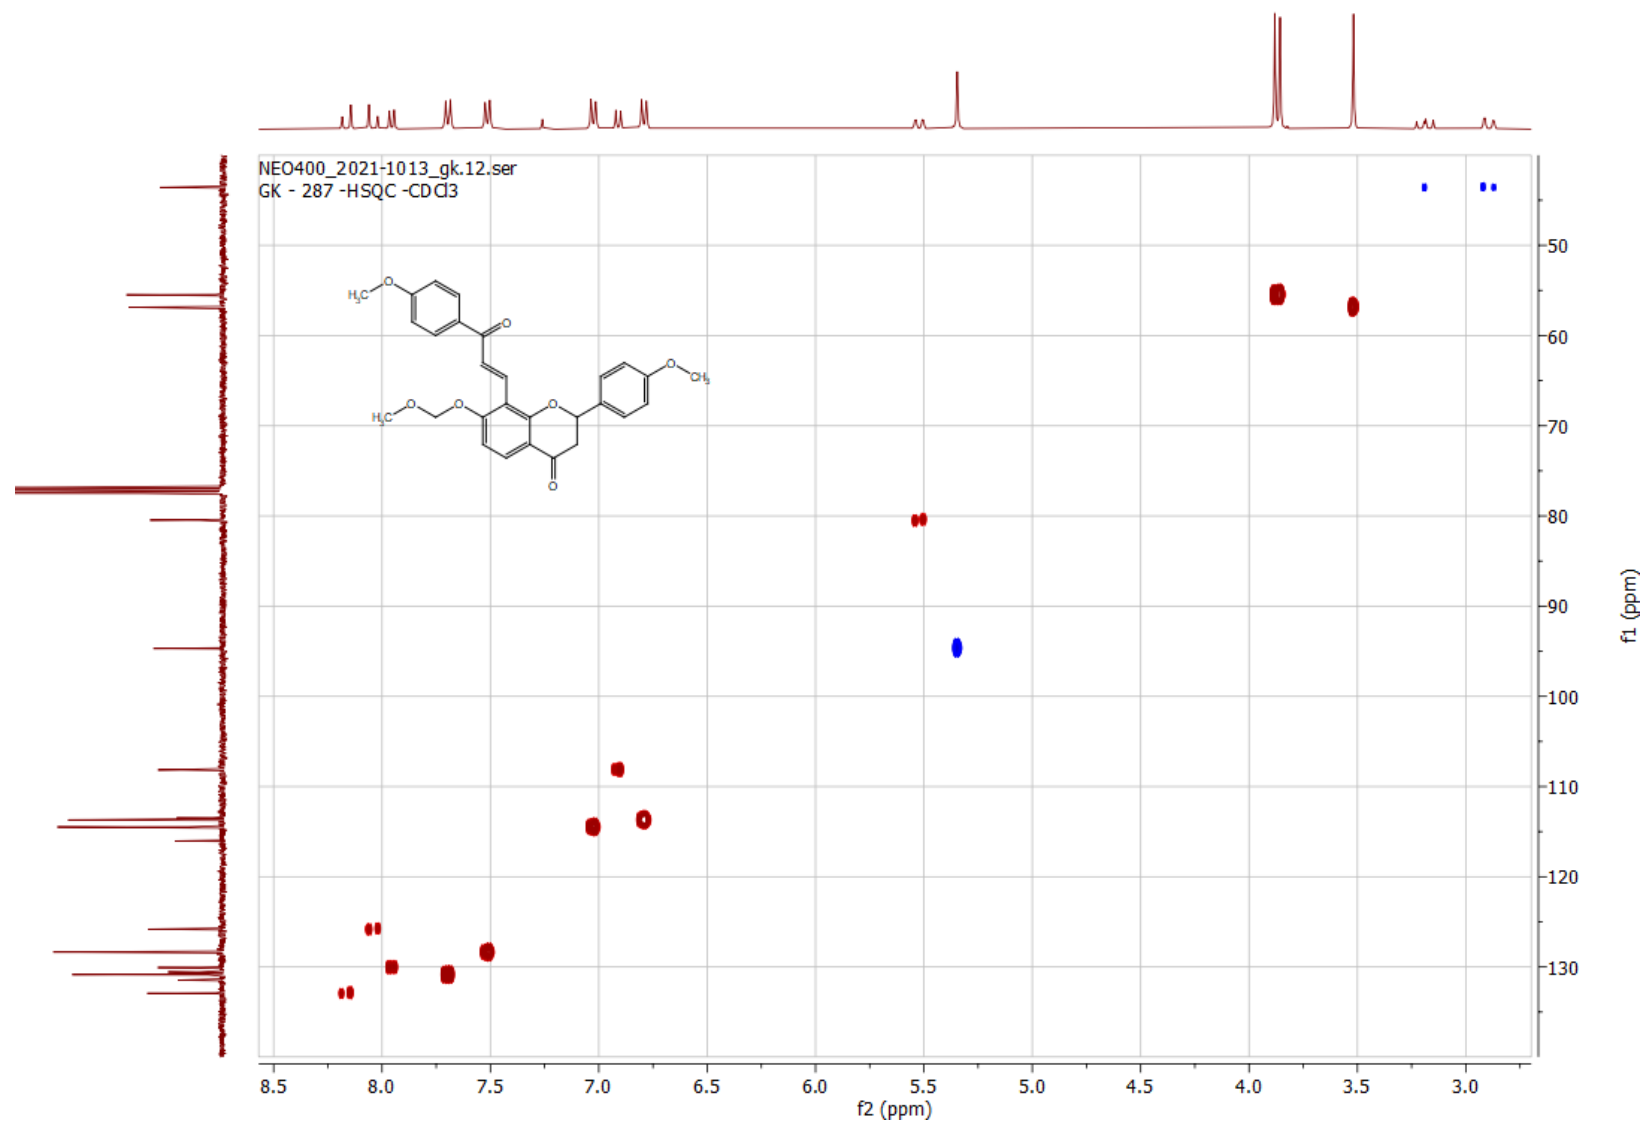

Figure S184: HMBC (400/100 MHz, CDCl<sub>3</sub>) of 17cf

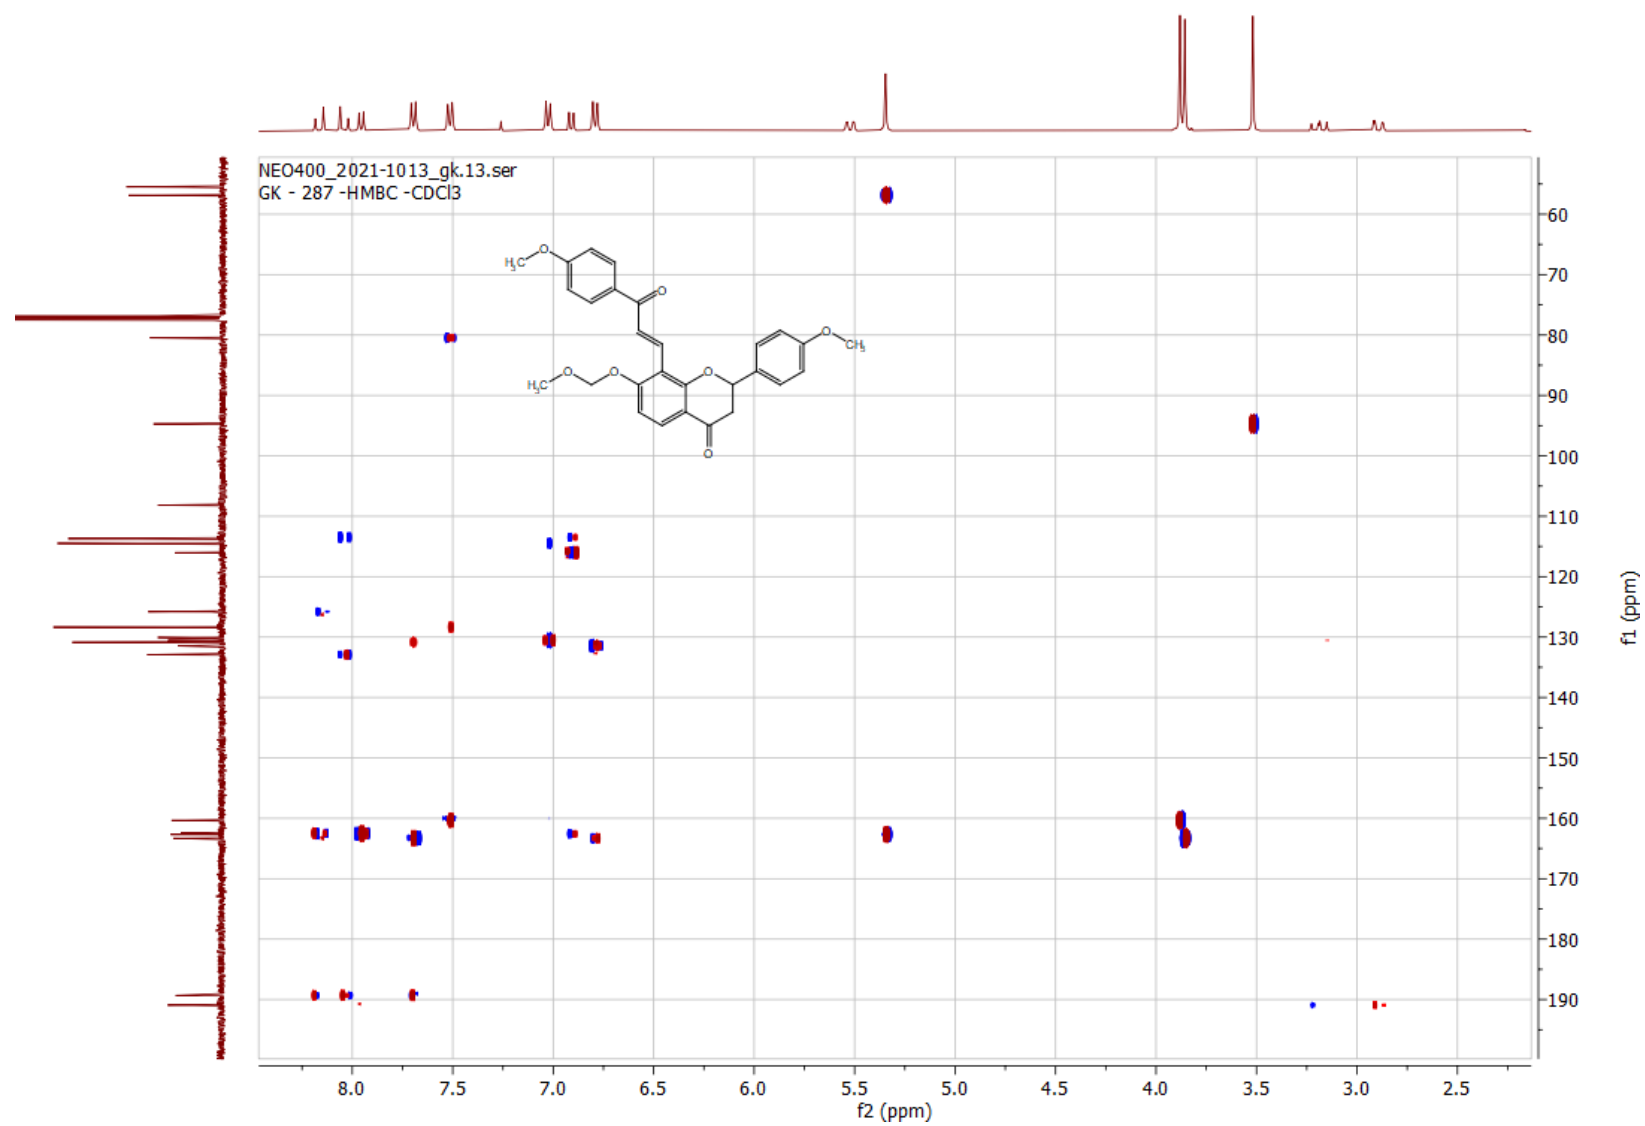

**Figure S185:**  $^1\text{H}$  NMR (400 MHz,  $\text{CDCl}_3$ ) of **18af**

NEO400\_2021-1021\_gk.10.fid  
GK - 288 -1H - DMSO

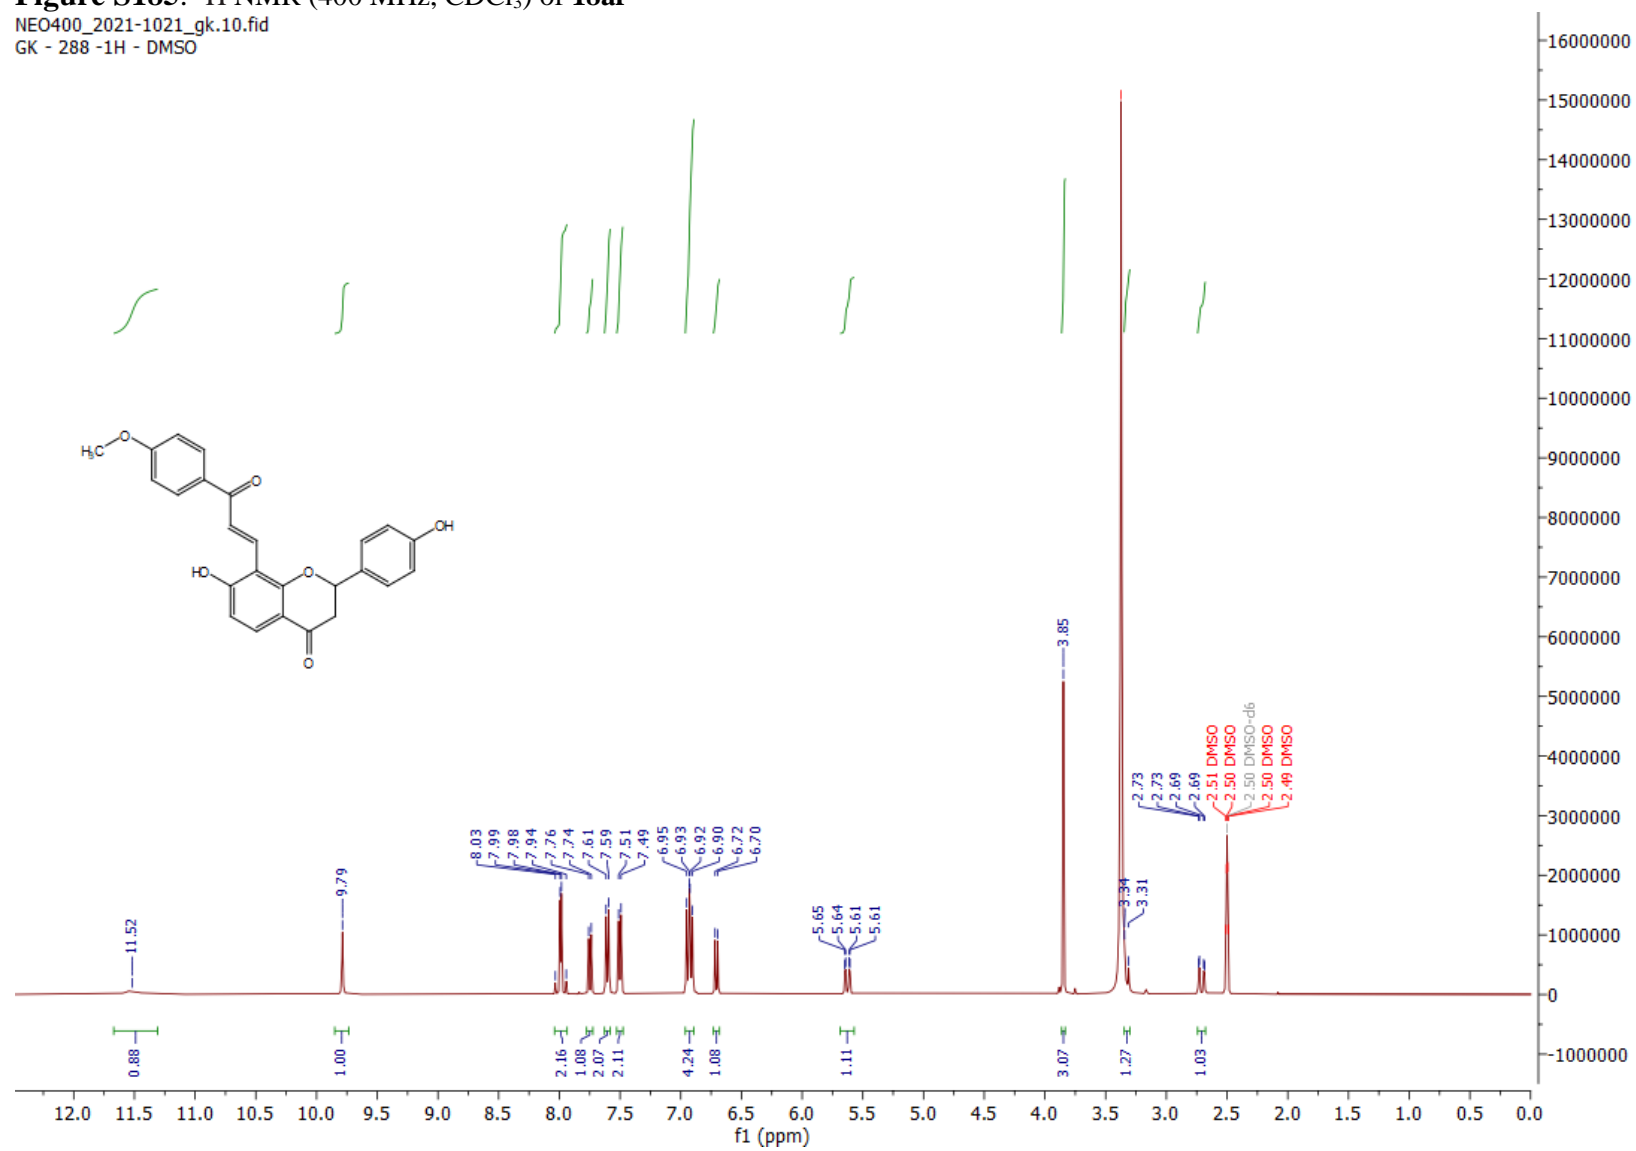

**Figure S186:**  $^{13}\text{C}\{^1\text{H}\}$  NMR (100 MHz,  $\text{CDCl}_3$ ) of **18af**

NEO400\_2021-1021\_gk.11.fid  
GK - 288 -13C - DMSO

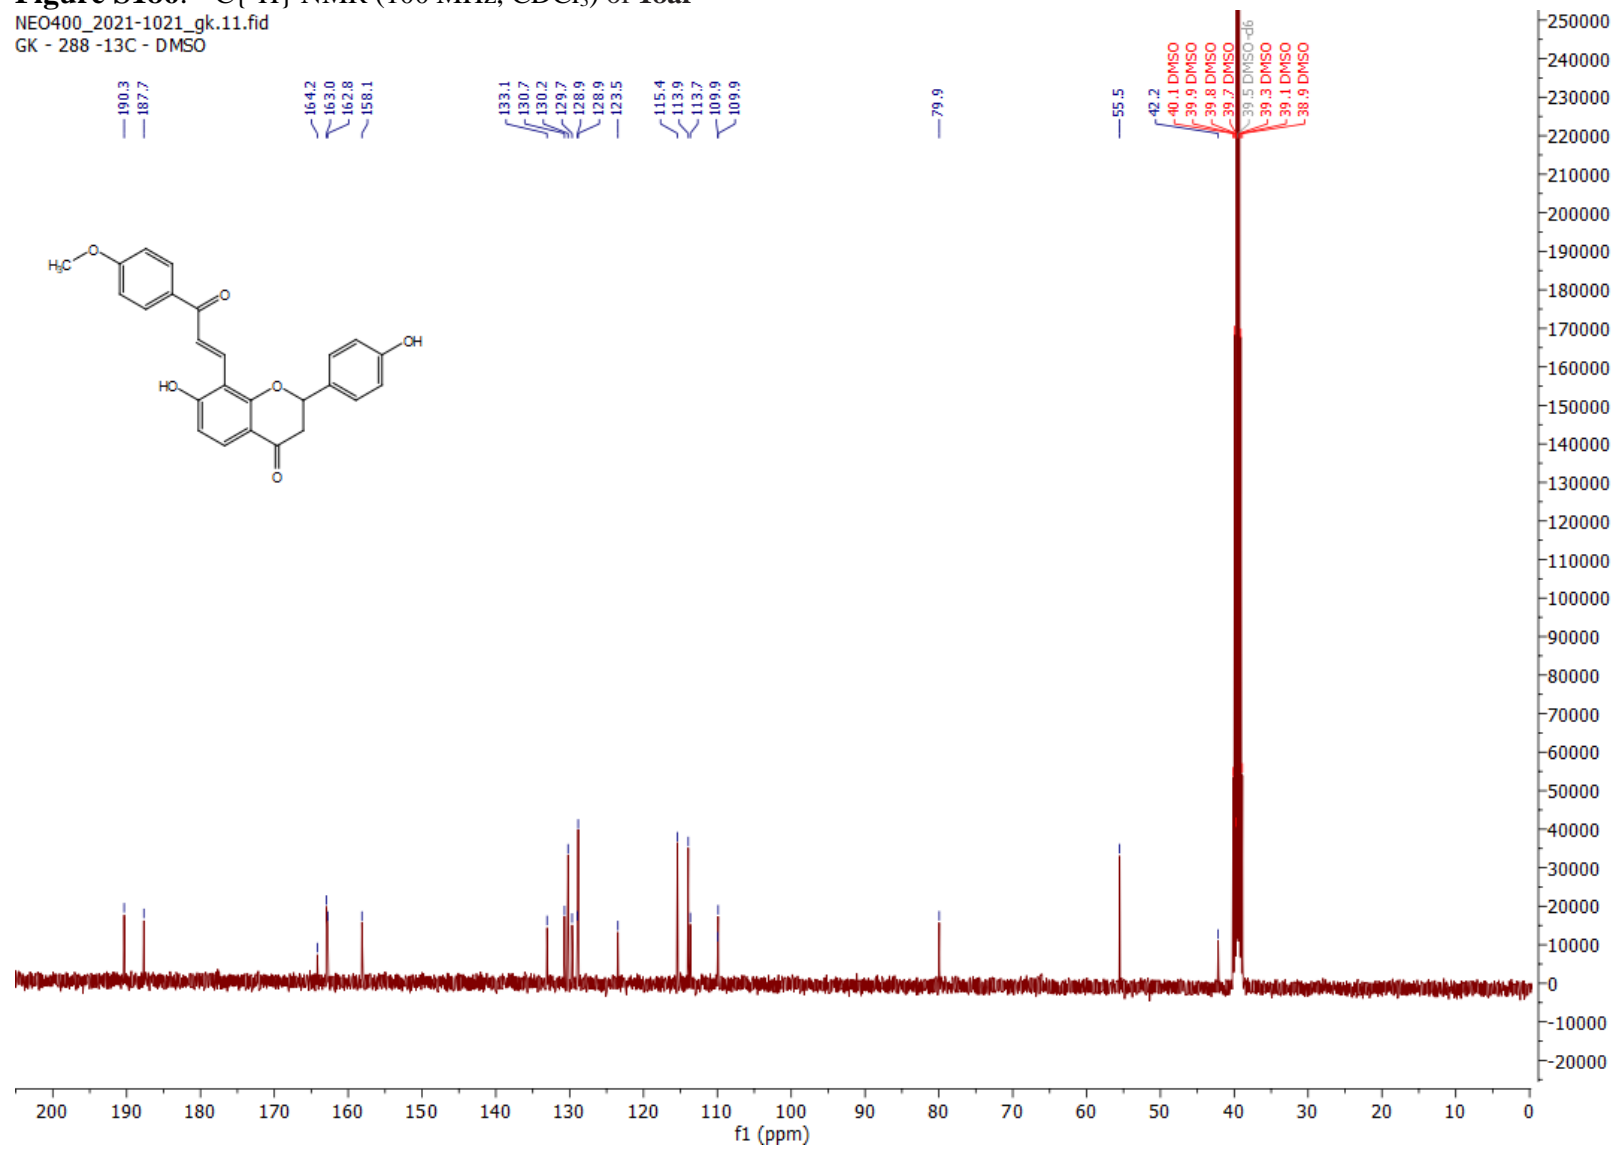

**Figure S187:**  $^1\text{H}$  NMR (400 MHz,  $\text{CDCl}_3$ ) of **18bf**

NEO400\_2021-1018\_gk.10.fid  
GK - 289 -1H - DMSO

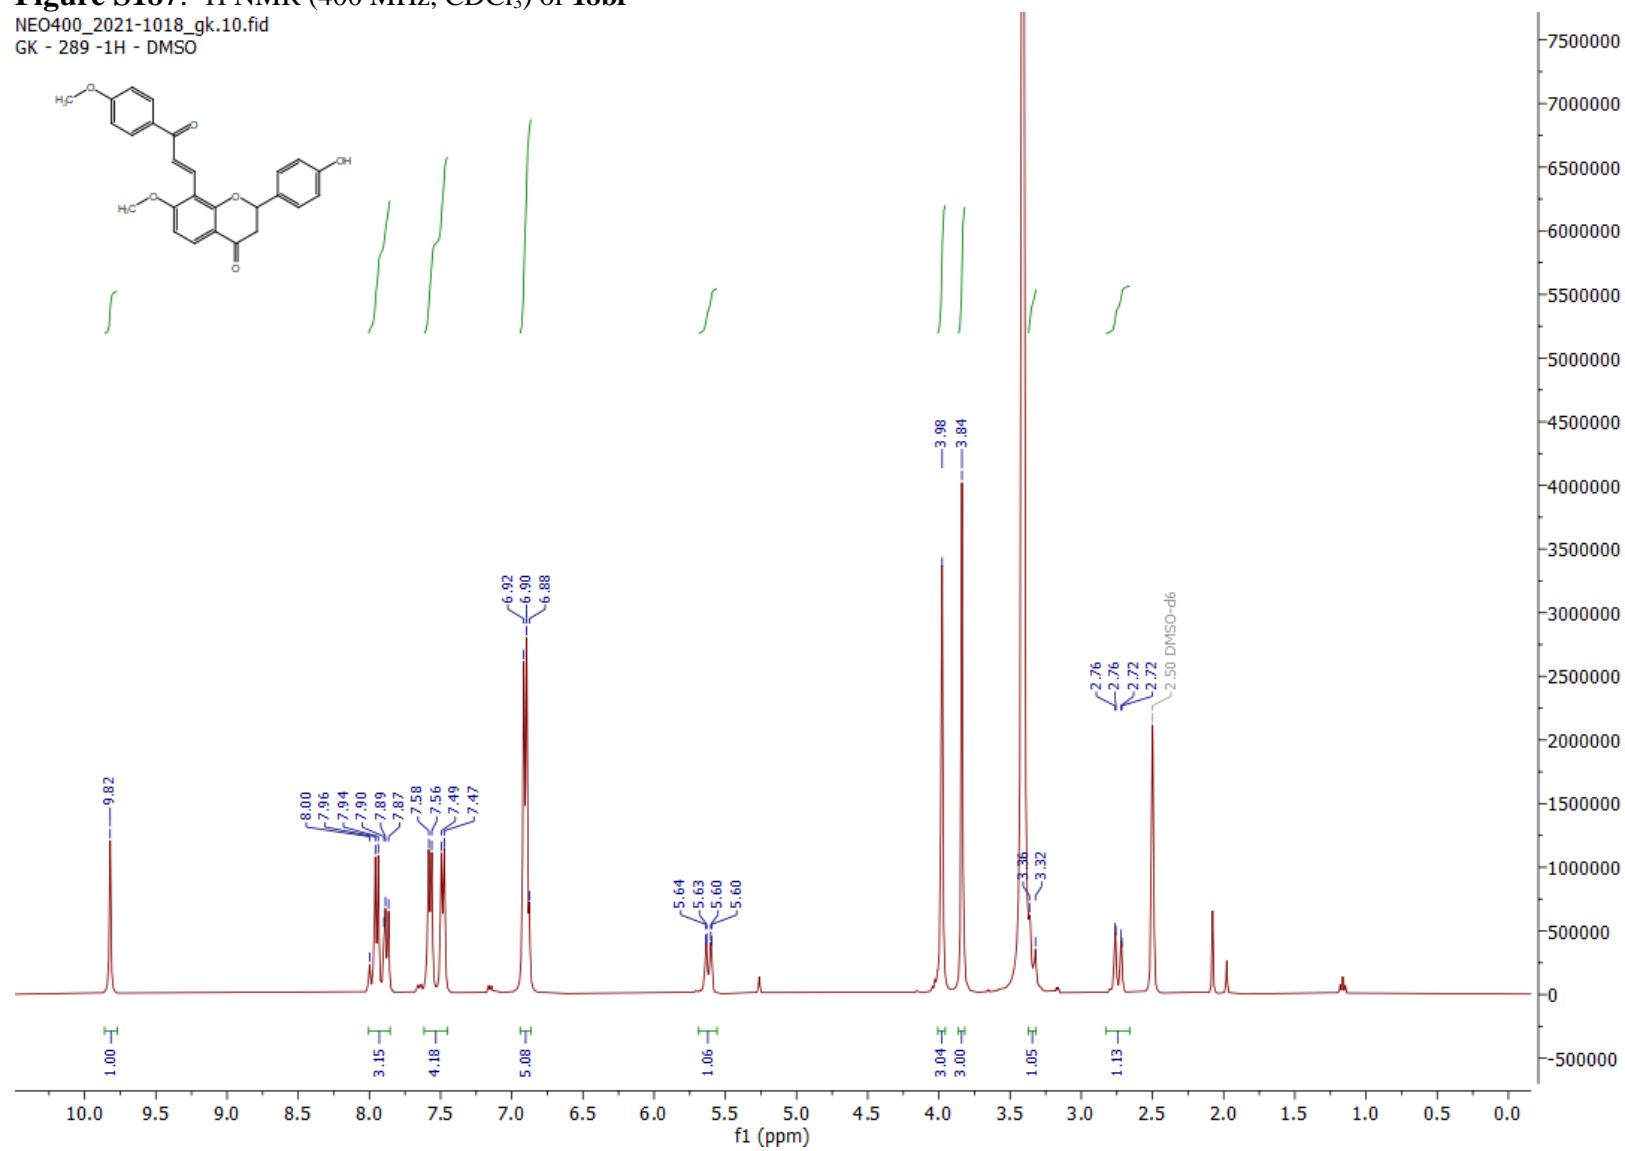

**Figure S188:**  $^{13}\text{C}\{^1\text{H}\}$  NMR (100 MHz,  $\text{CDCl}_3$ ) of **18bf**

NEO400\_2021-1018\_gk.11.fid  
GK - 289 -13C - DMSO

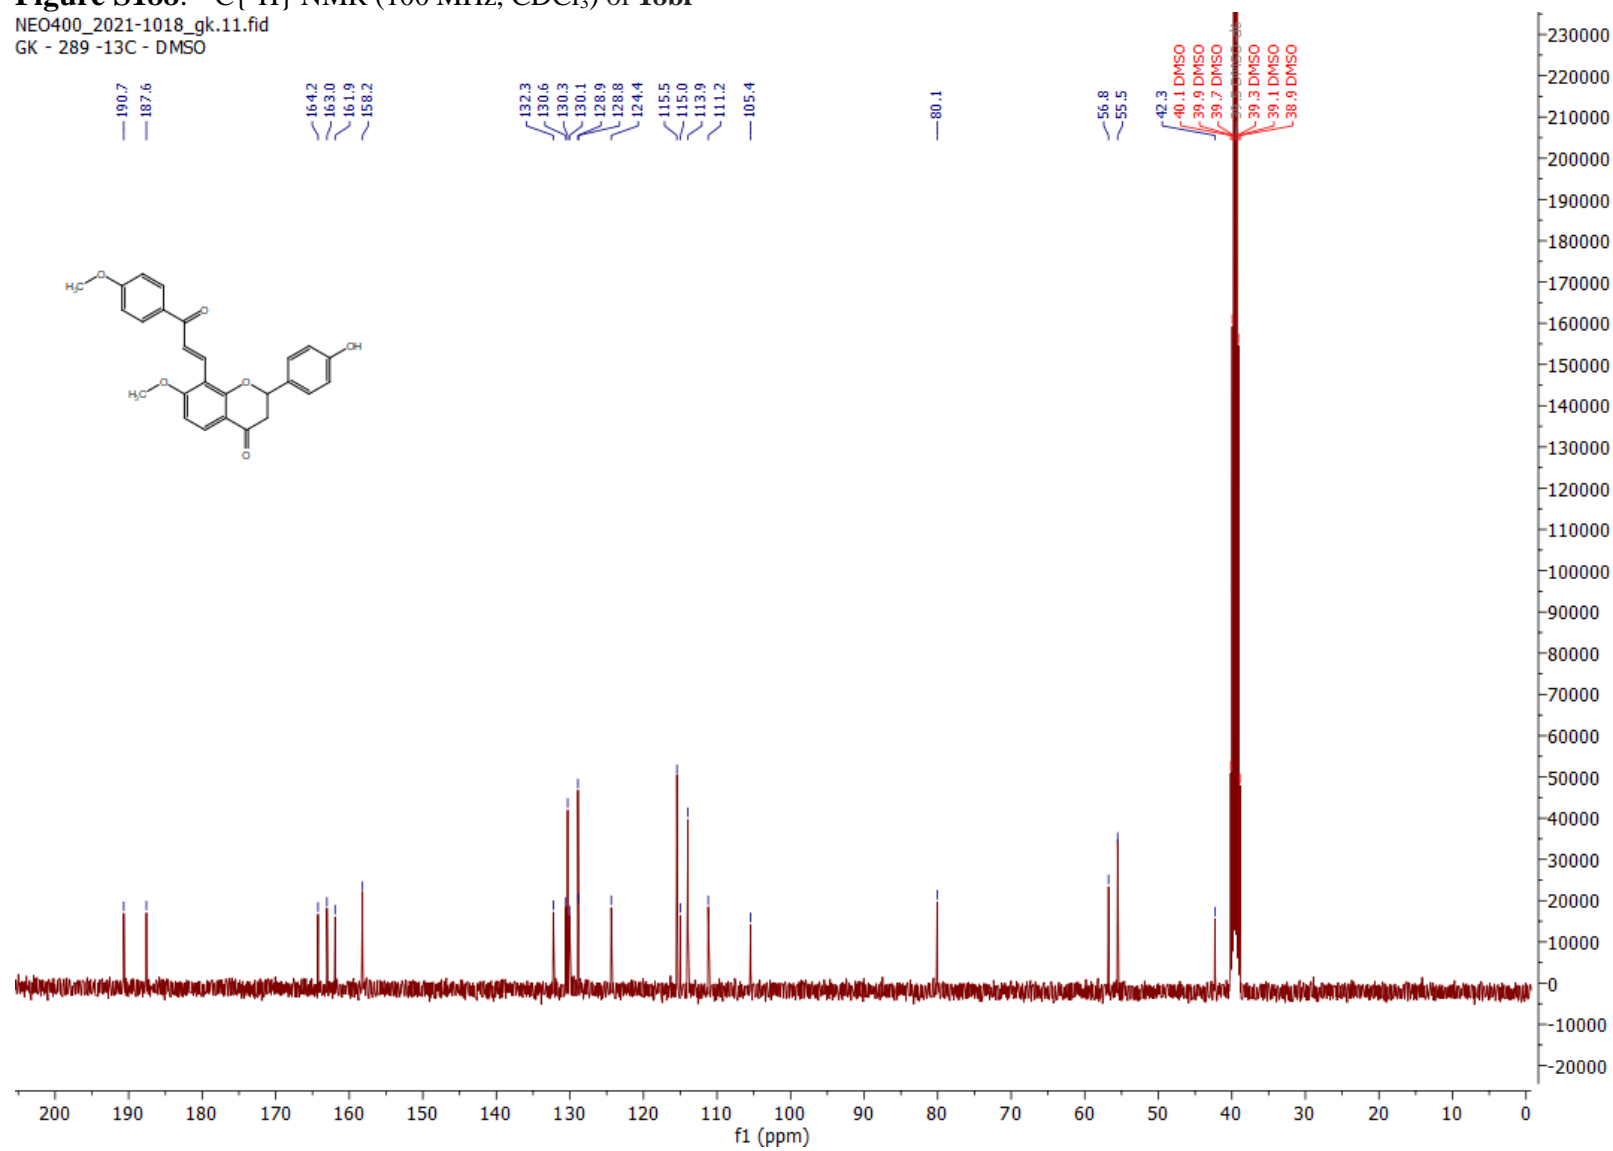

**Figure S189:**  $^1\text{H}$  NMR (400 MHz,  $\text{CDCl}_3$ ) of **18cf**

NEO400\_2021-1021\_gk.20.fid  
GK - 290 -1H - DMSO

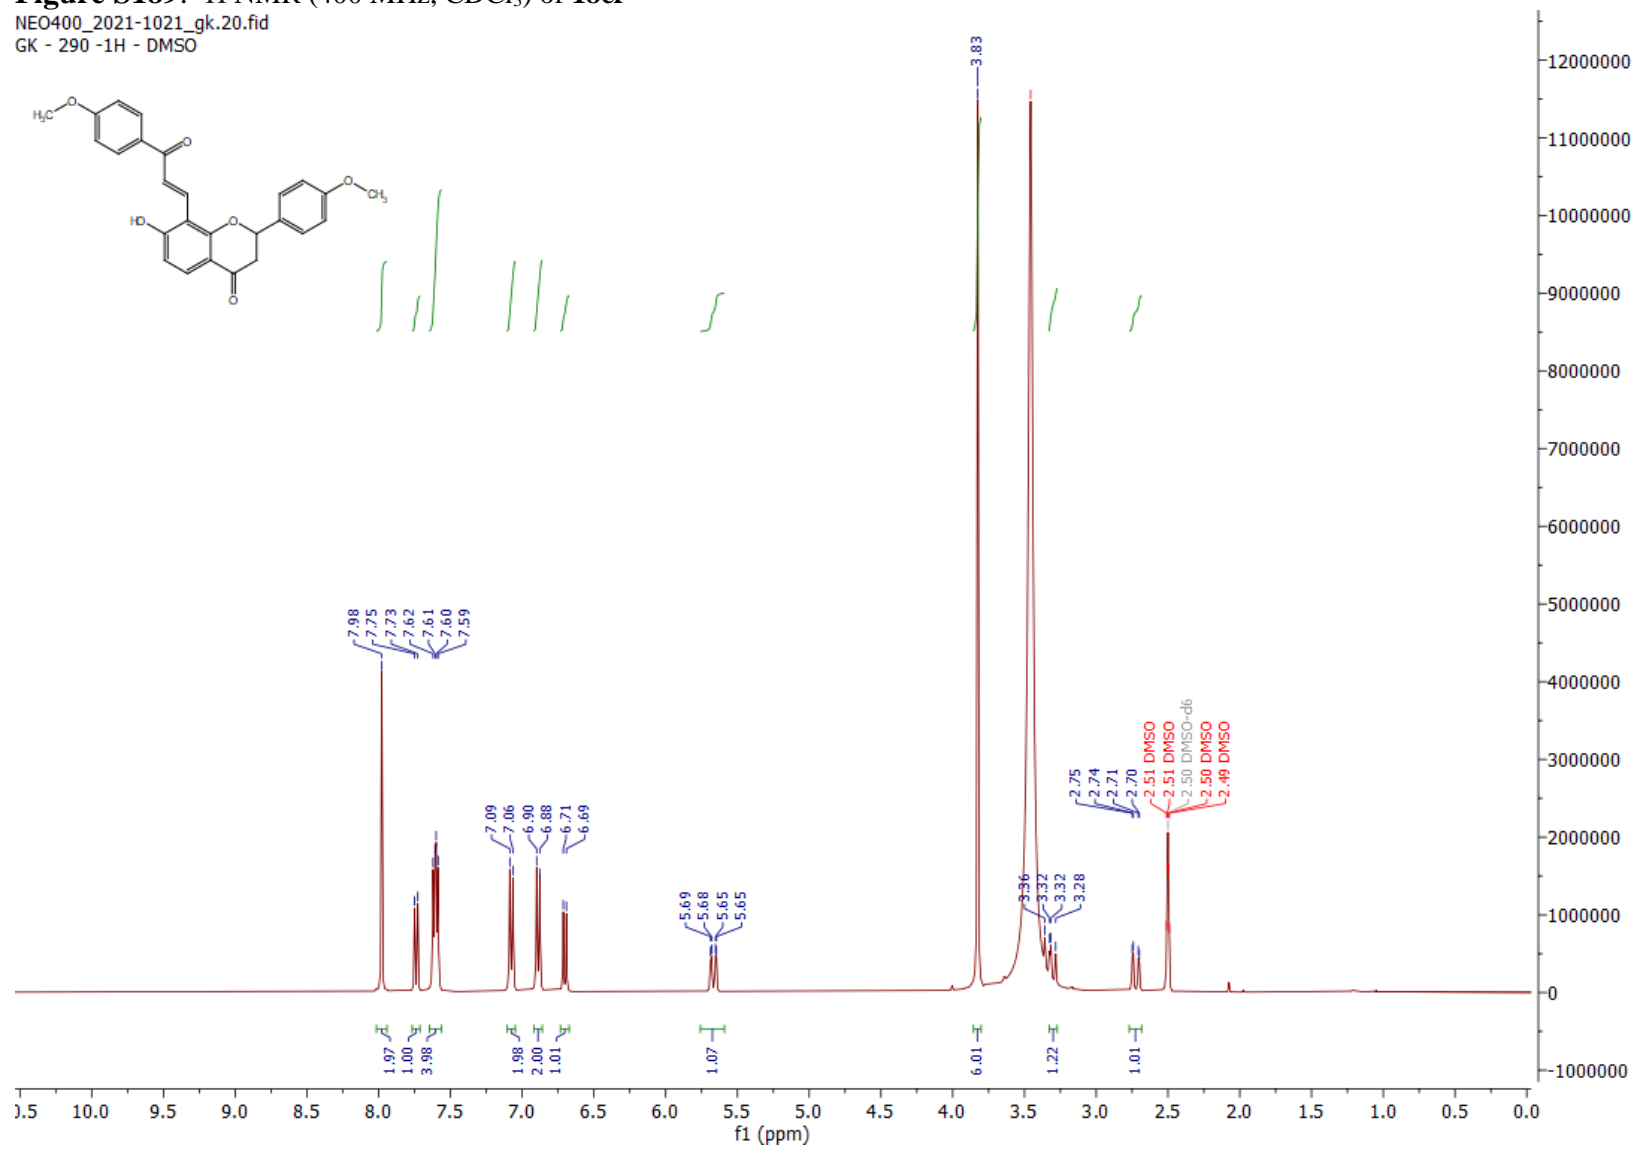



**Figure S190:**  $^{13}\text{C}\{^1\text{H}\}$  NMR (100 MHz,  $\text{CDCl}_3$ ) of **18cf**

NEO400\_2021-1021\_gk.21.fid  
GK - 290 -13C - DMSO

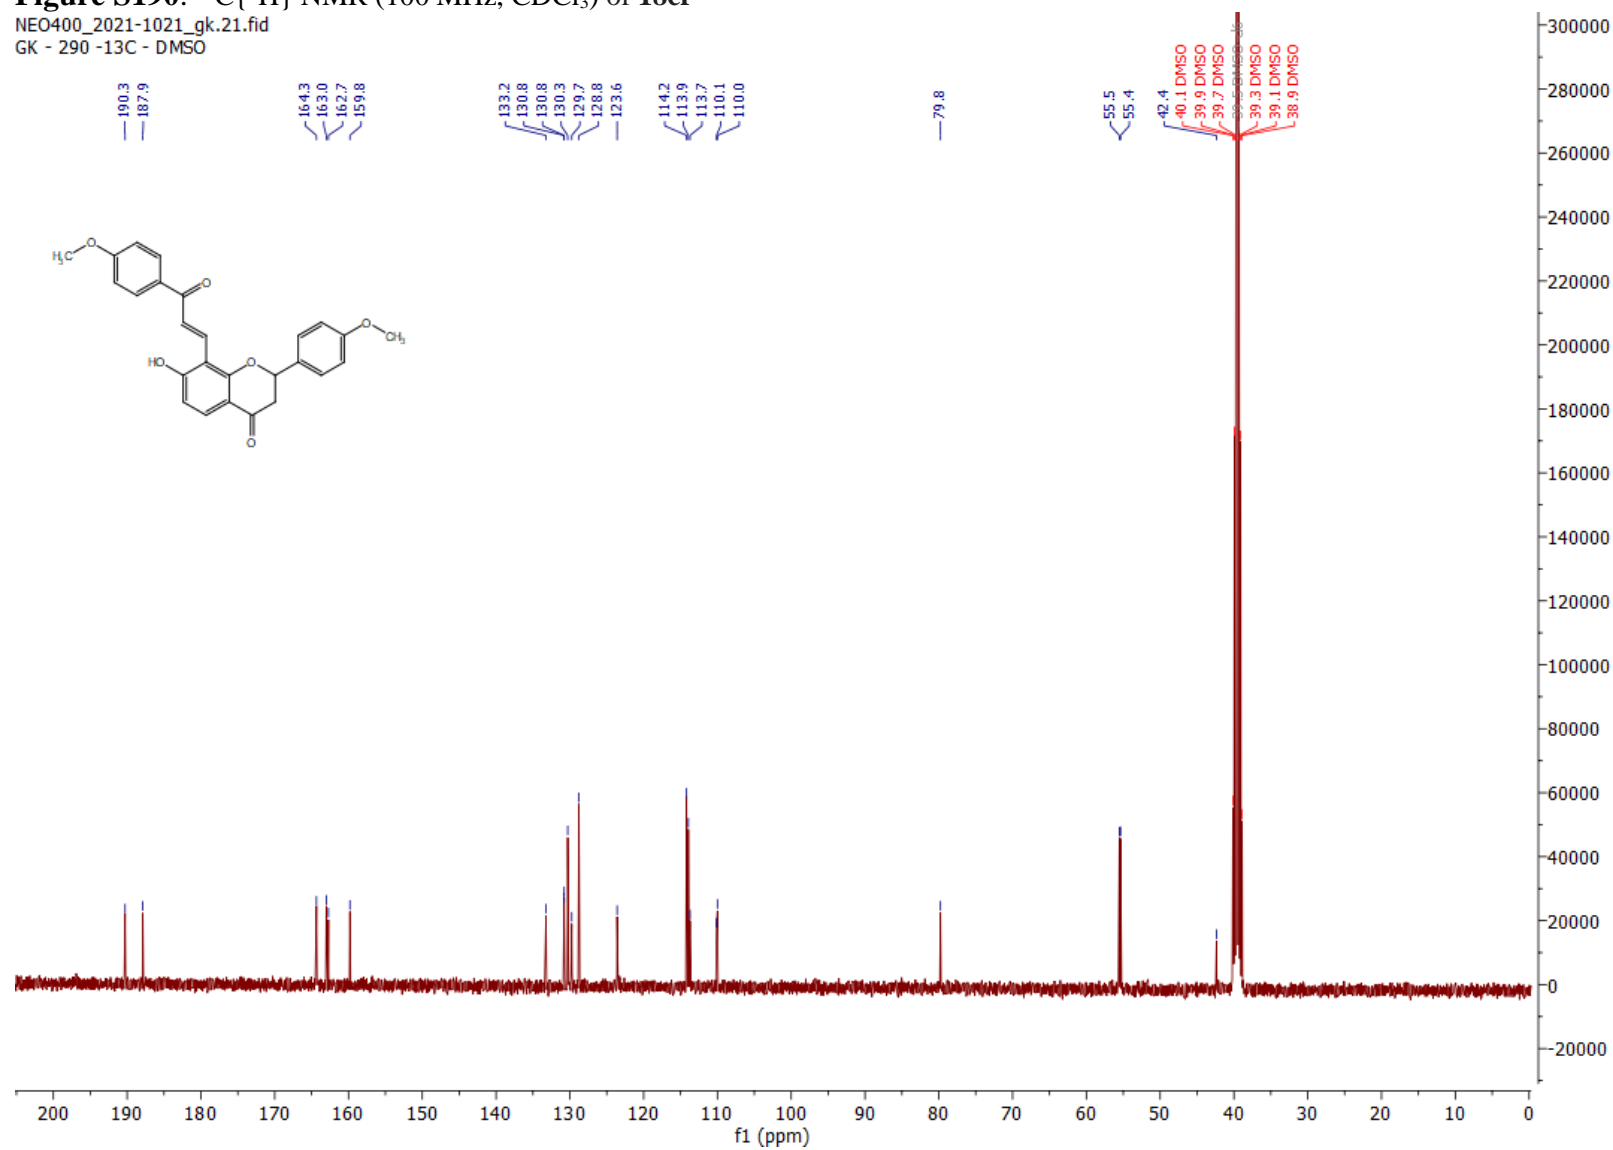



**Figure S192:**  $^1\text{H}$  NMR (400 MHz,  $\text{CDCl}_3$ ) of **20**

MAS400\_2022-1014\_gk.10.fid  
GK - 316 - 1H -  $\text{CDCl}_3$

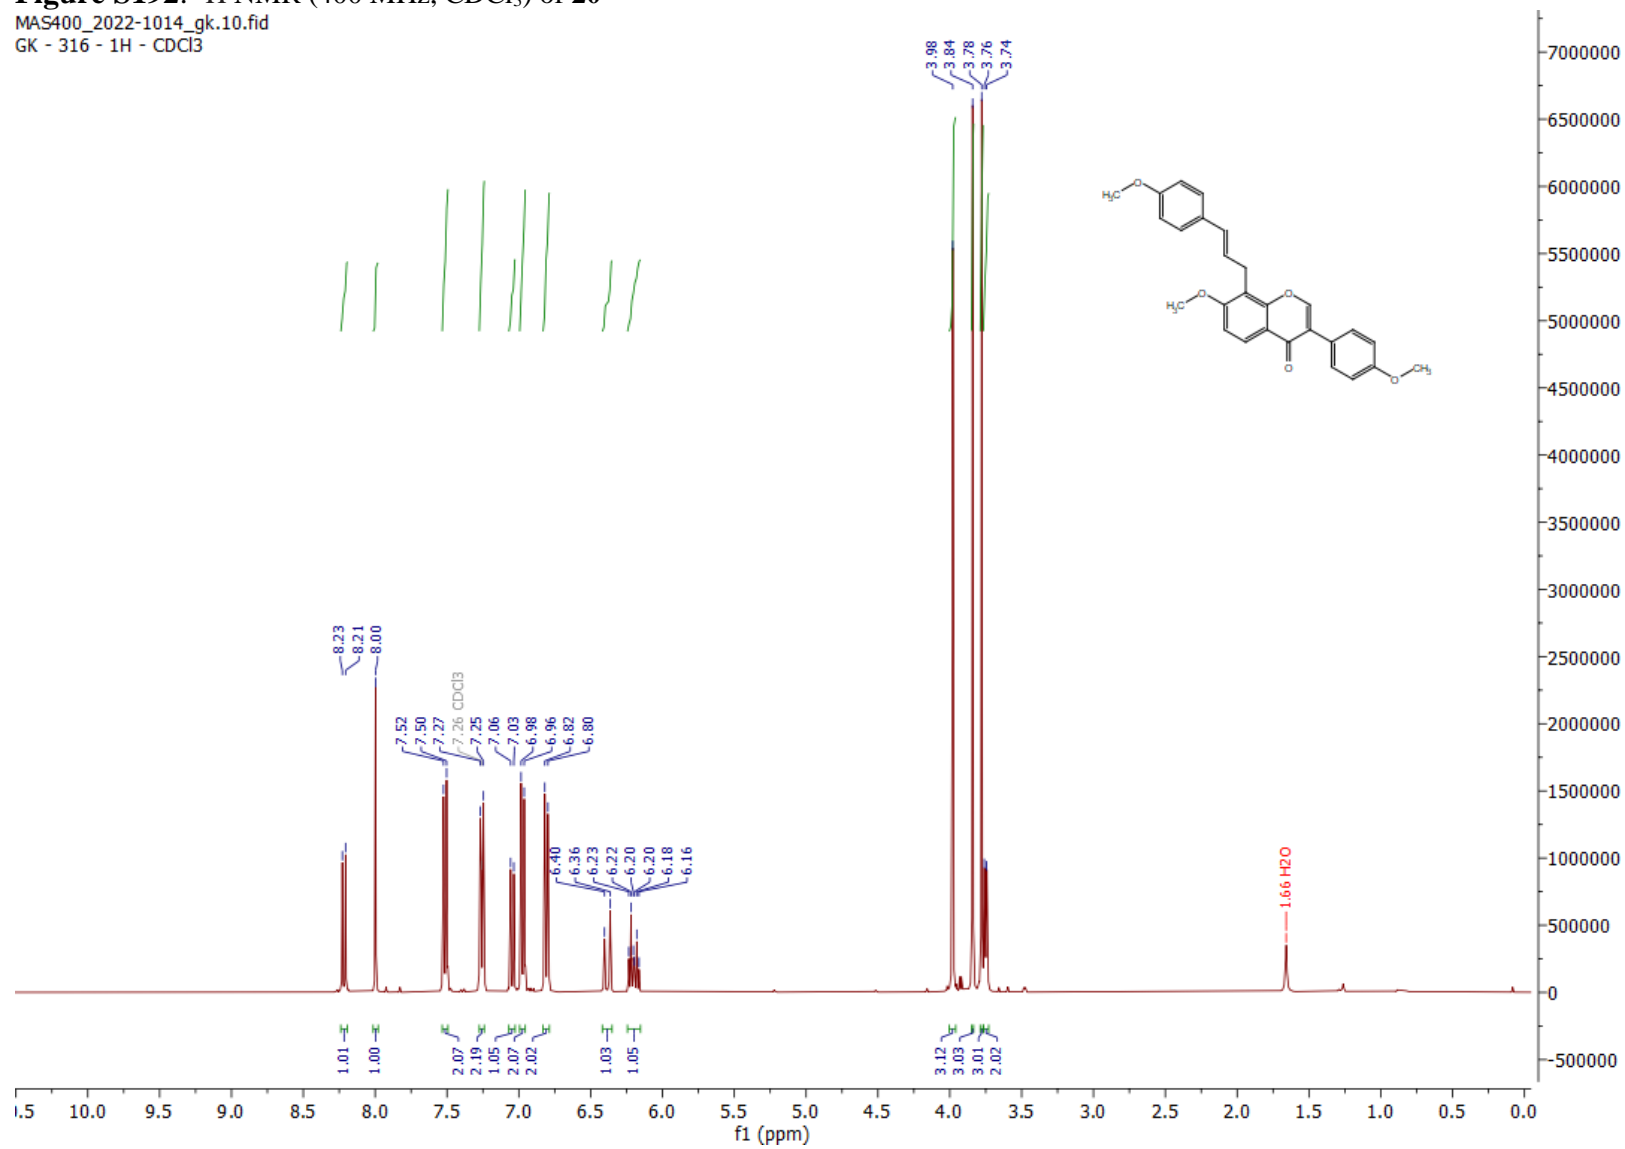

**Figure S193:**  $^{13}\text{C}\{^1\text{H}\}$  NMR (100 MHz,  $\text{CDCl}_3$ ) of **20**

MAS400\_2022-1014\_gk.11.fid  
GK - 316 - 13C -  $\text{CDCl}_3$

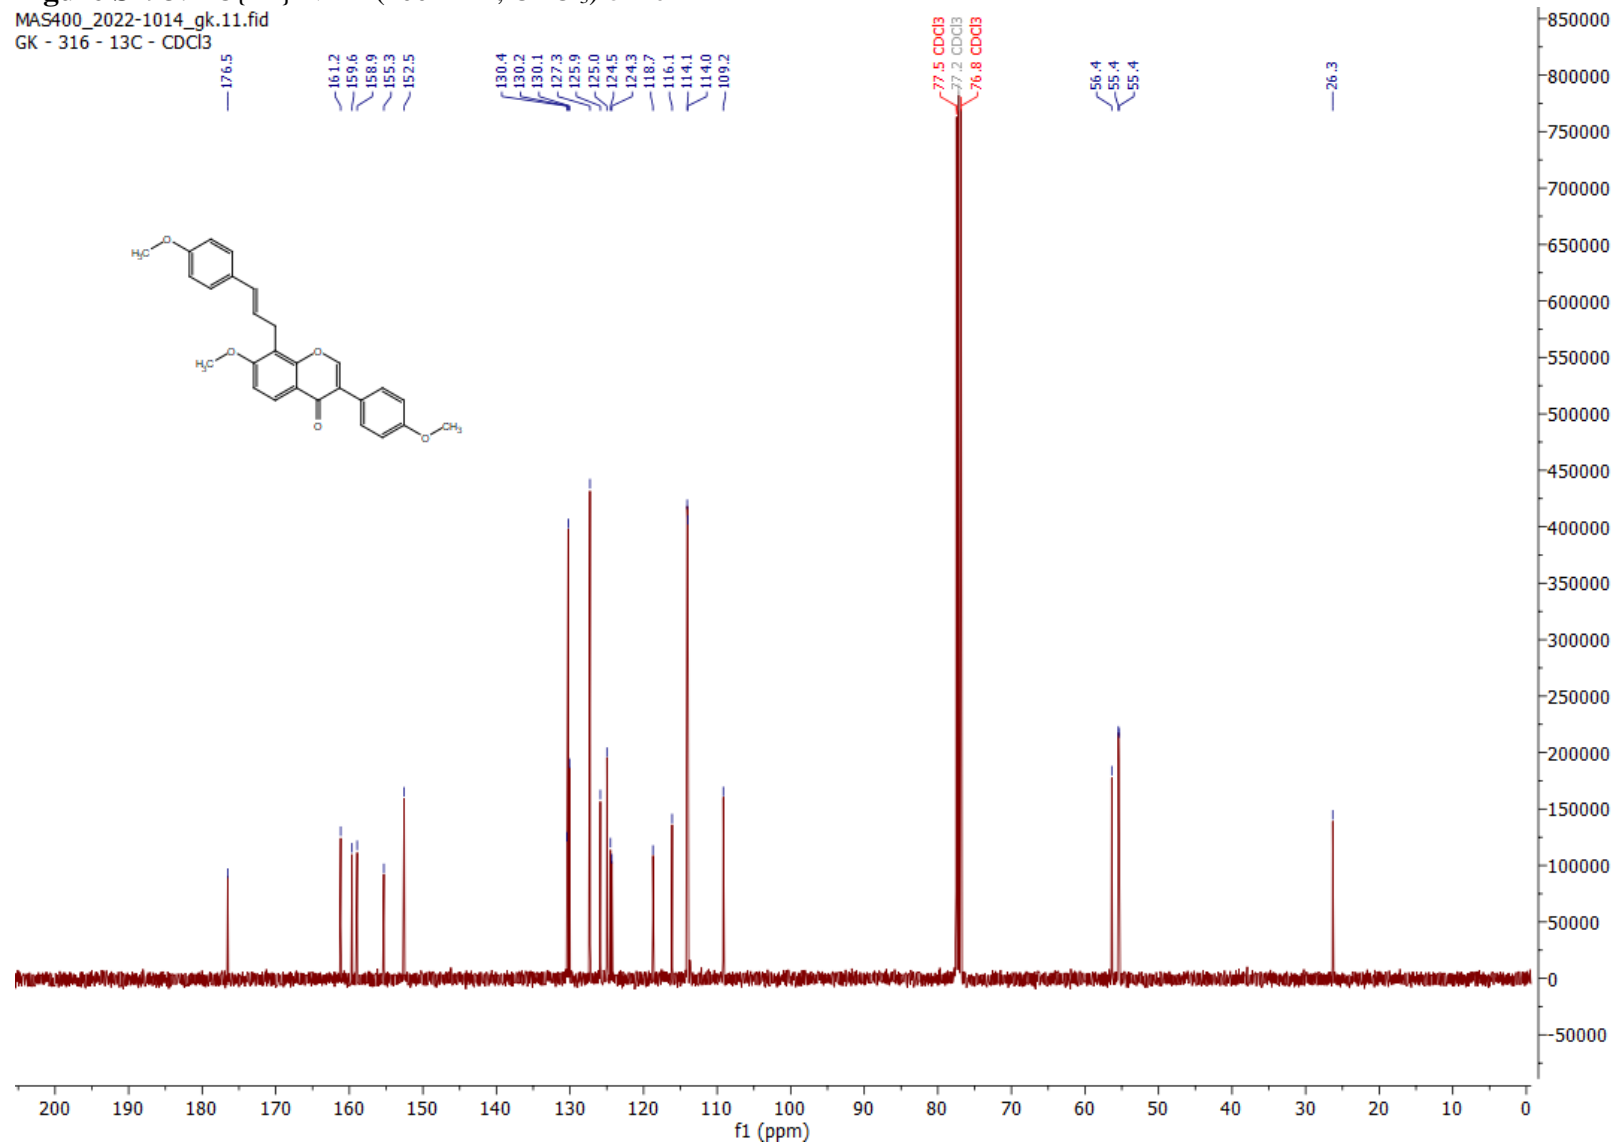

Figure S194: HSQC (400/100 MHz, CDCl<sub>3</sub>) of **20**

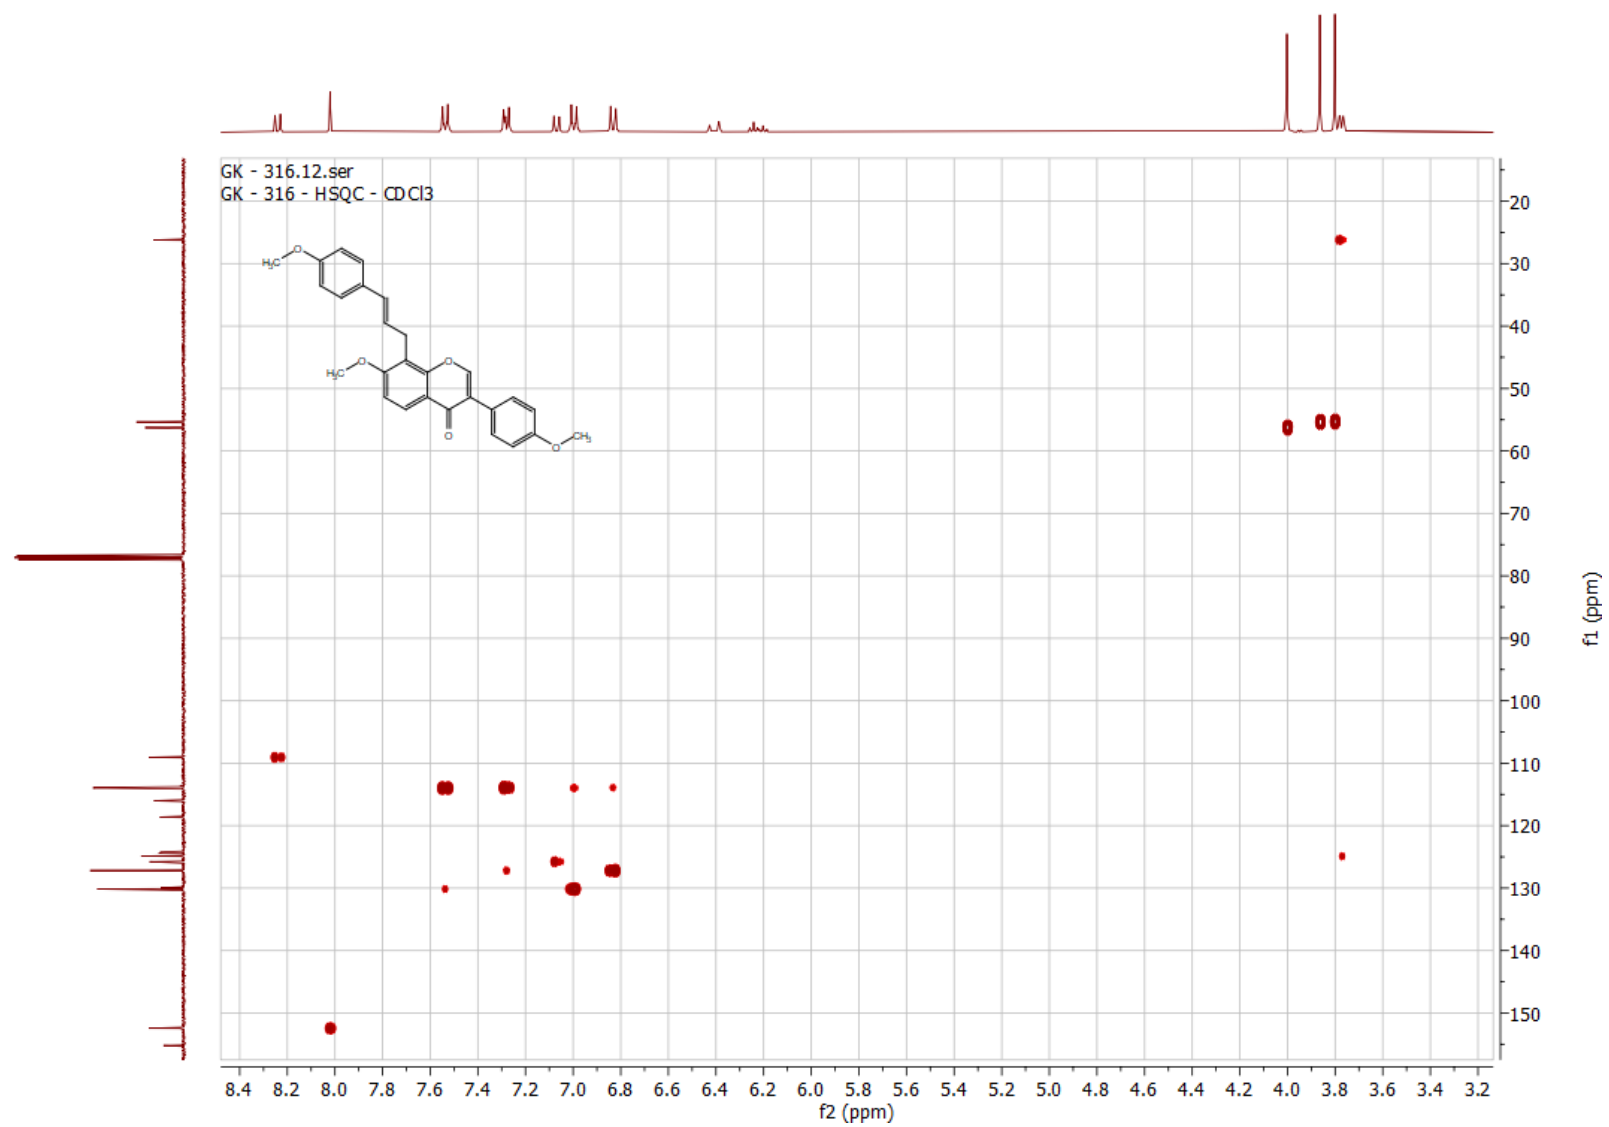

Figure S195: HMBC (400/100 MHz, CDCl<sub>3</sub>) of **20**

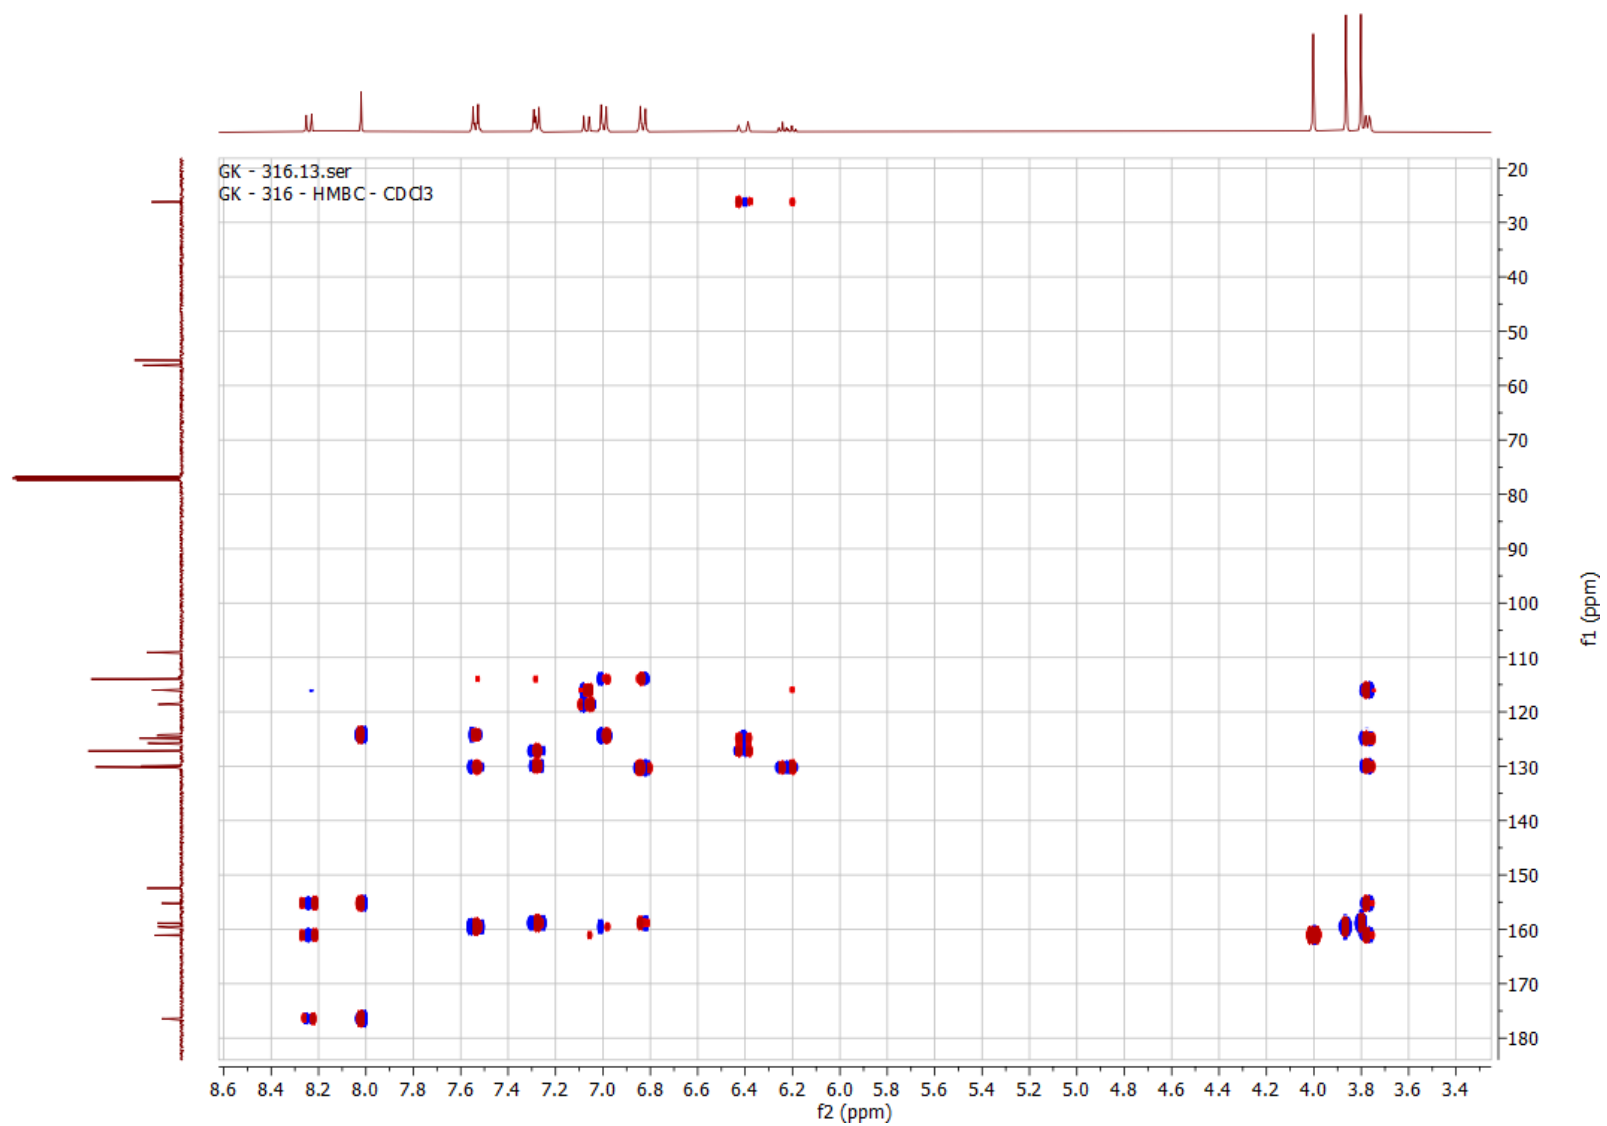

**Figure S196:** NMR-Signal assignment and selected HMBC-couplings for compound **21**

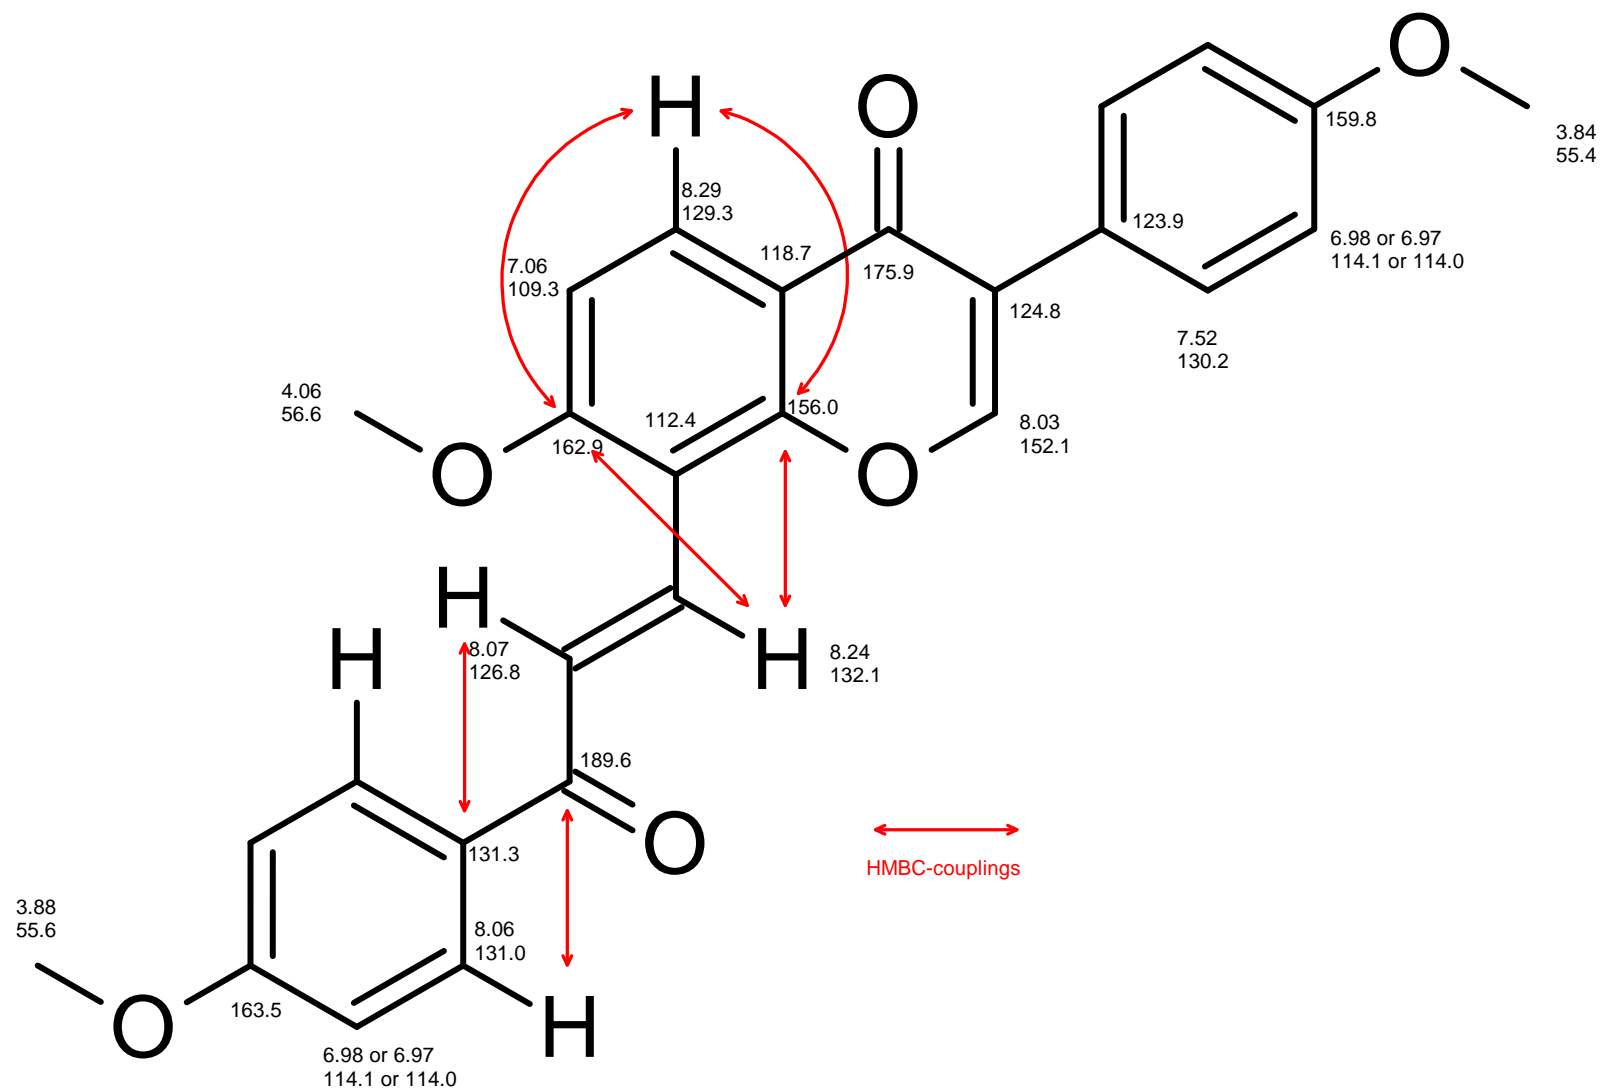

**Figure S197:**  $^1\text{H}$  NMR (400 MHz,  $\text{CDCl}_3$ ) of **21**

NEO400\_2022-1016\_gk.20.fid  
GK - 318 - 1H -  $\text{CDCl}_3$

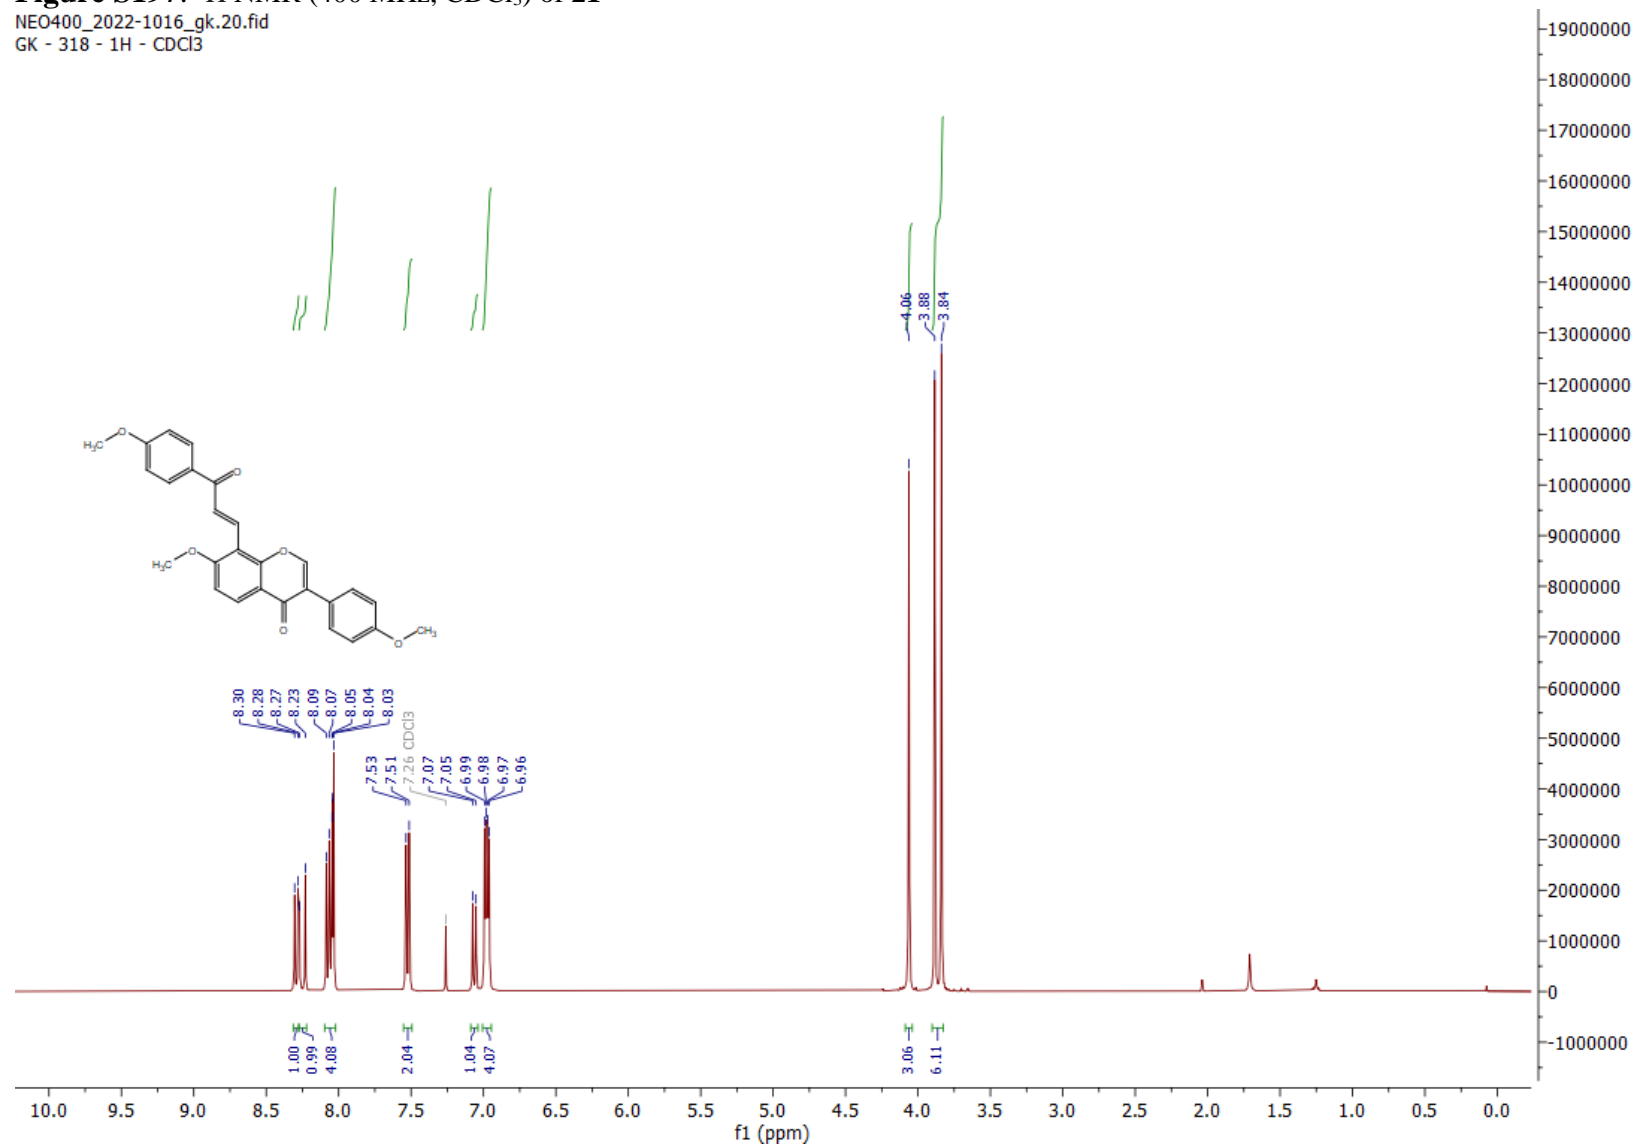



**Figure S198:**  $^{13}\text{C}\{^1\text{H}\}$  NMR (100 MHz,  $\text{CDCl}_3$ ) of **21**

NEO400\_2022-1016\_gk.21.fid

GK - 318 -  $^{13}\text{C}$  -  $\text{CDCl}_3$

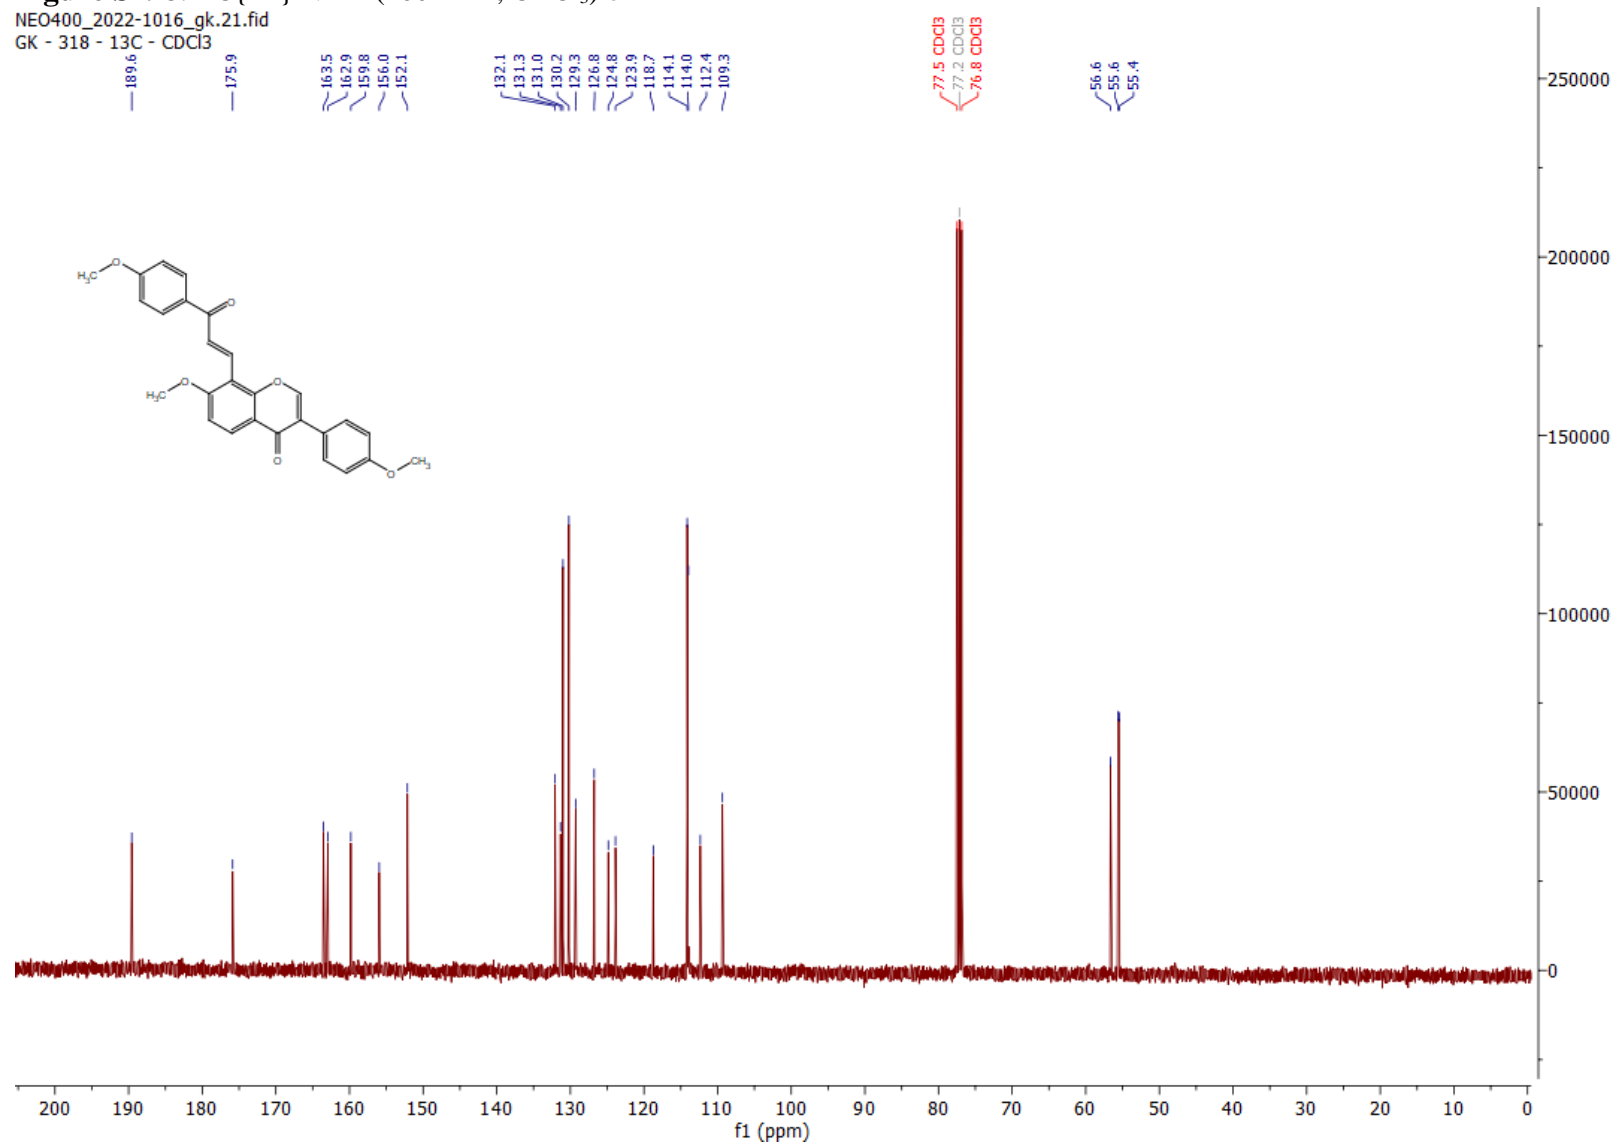

Figure S199: HSQC (400/100 MHz, CDCl<sub>3</sub>) of **21**

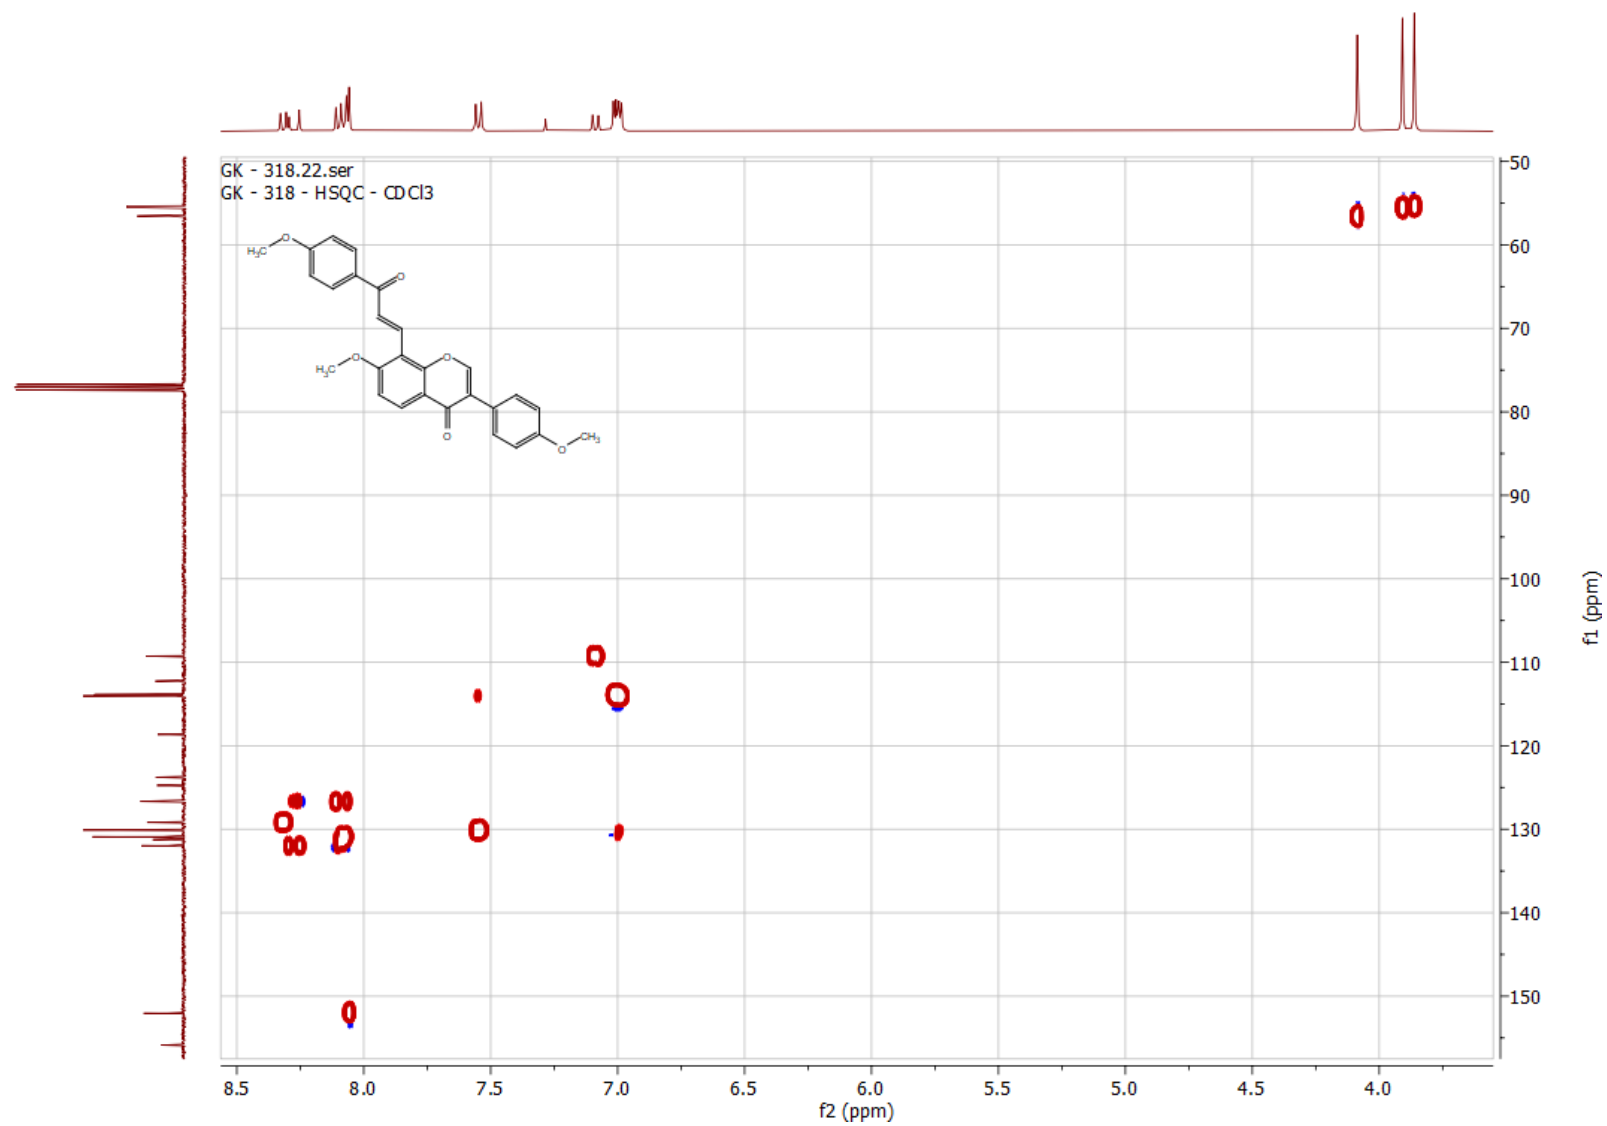

Figure S200: HMBC (400/100 MHz, CDCl<sub>3</sub>) of 21

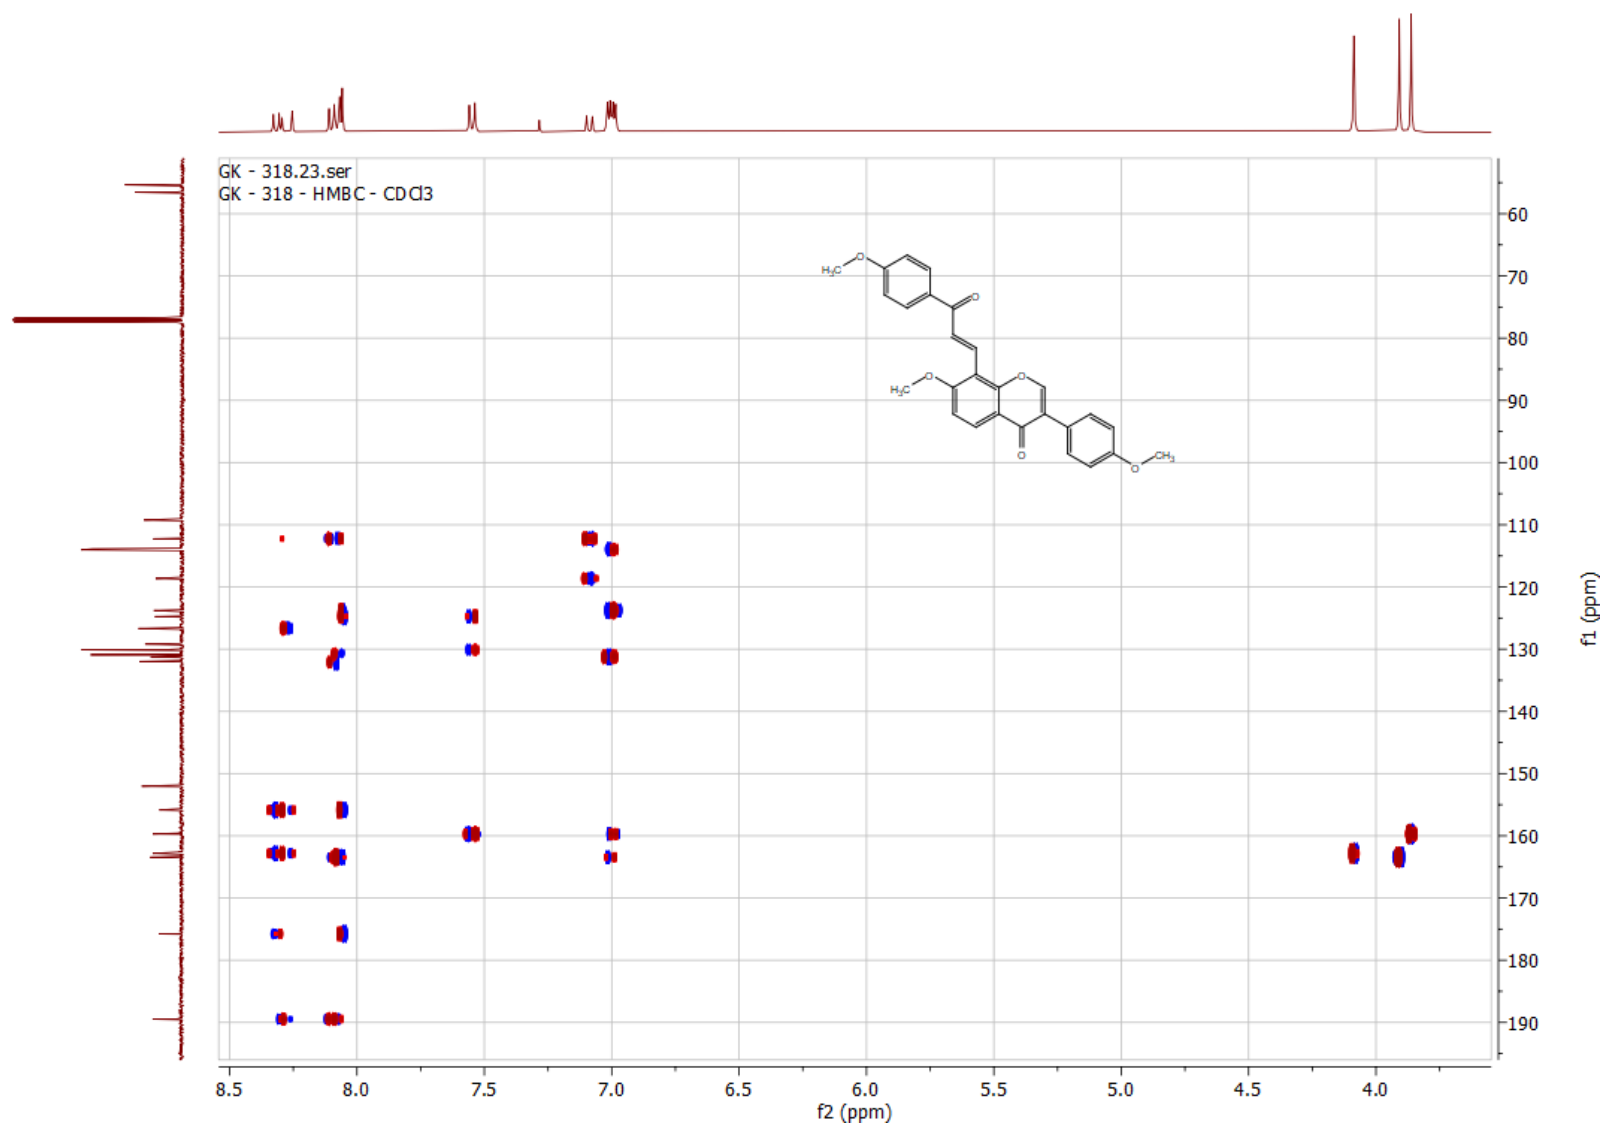

**Figure S201:** NMR-Signal assignment and selected HMBC-couplings for compound **23**

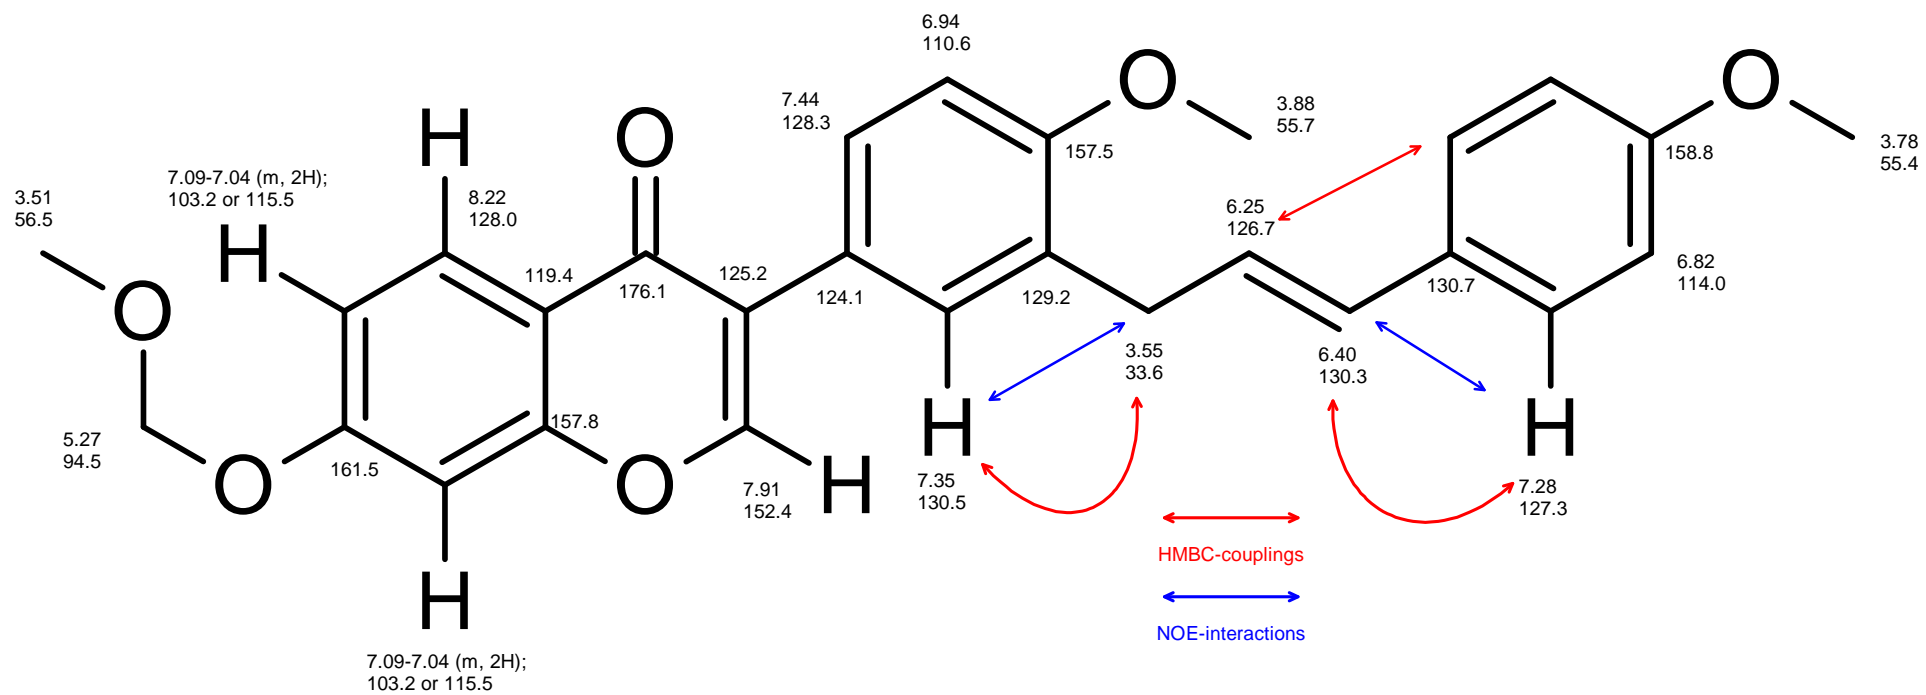

**Figure S202:**  $^1\text{H}$  NMR (400 MHz,  $\text{CDCl}_3$ ) of **23**

NEO400\_2024-0322\_gj.10.fid  
JG033- $\text{CDCl}_3$ -1H

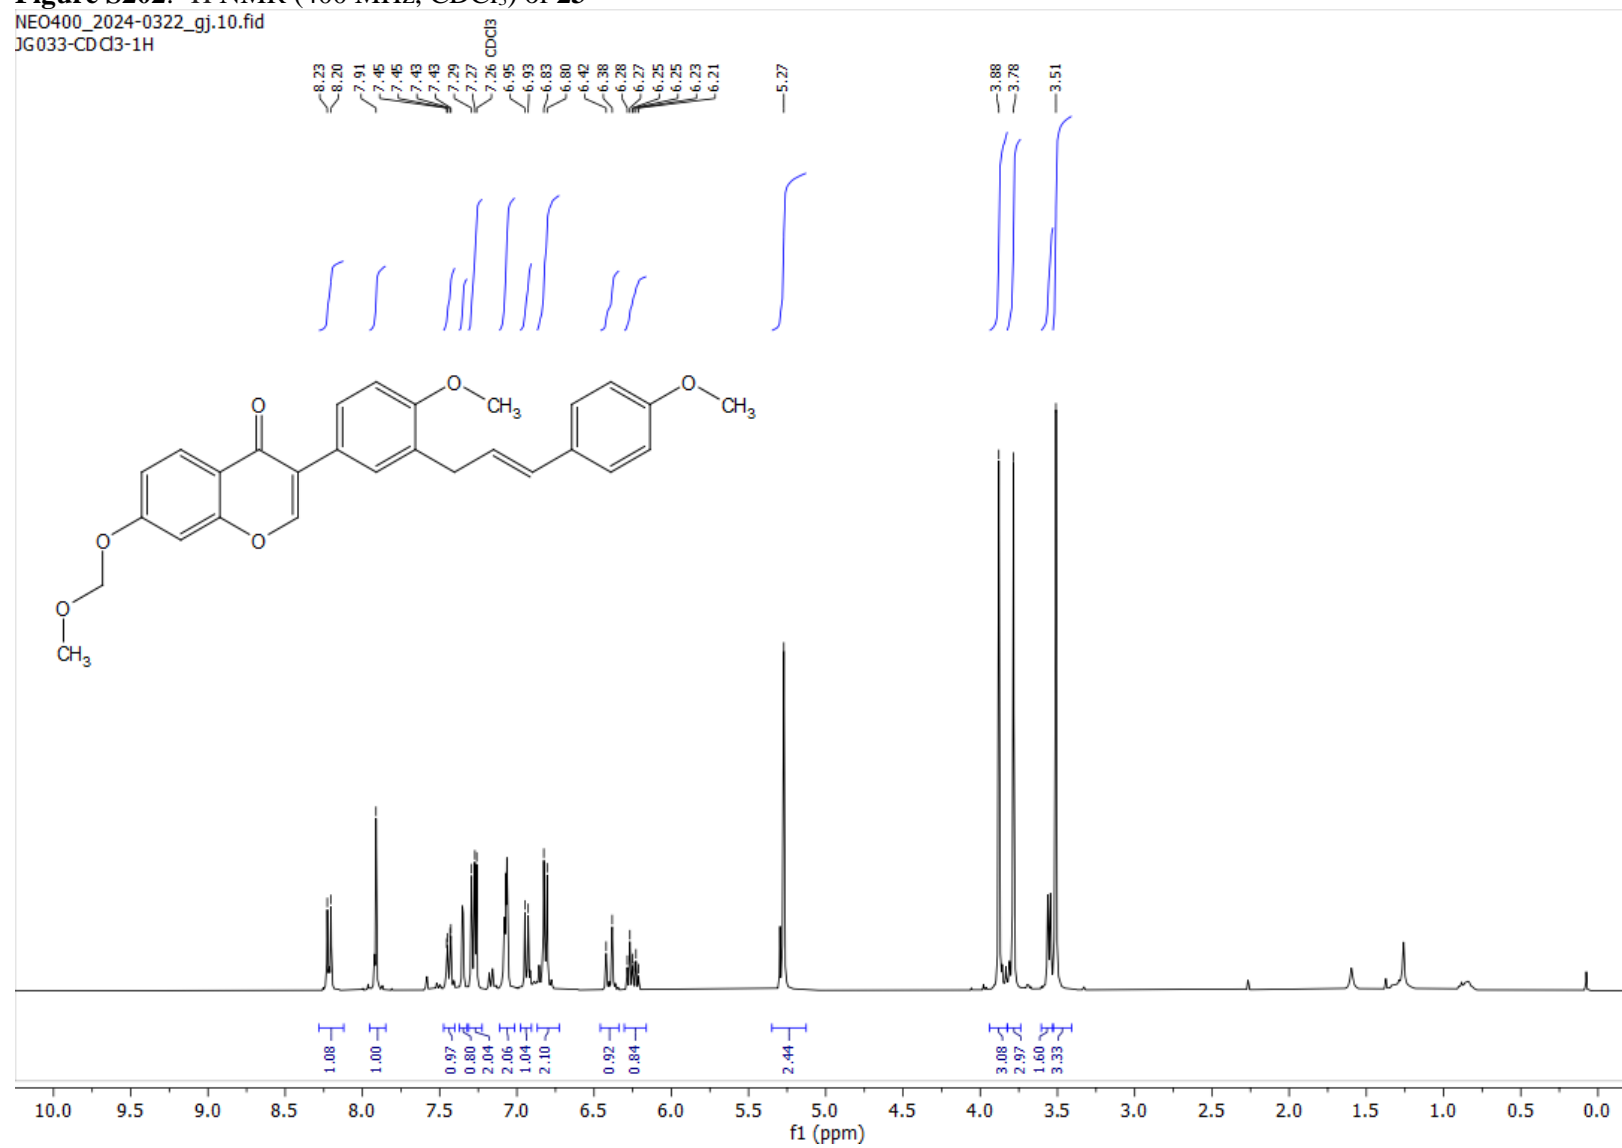

**Figure S203:**  $^{13}\text{C}\{^1\text{H}\}$  NMR (100 MHz,  $\text{CDCl}_3$ ) of **23**

NEO400\_2024-0322\_gj.11.fid  
JG033- $\text{CDCl}_3$ -13C

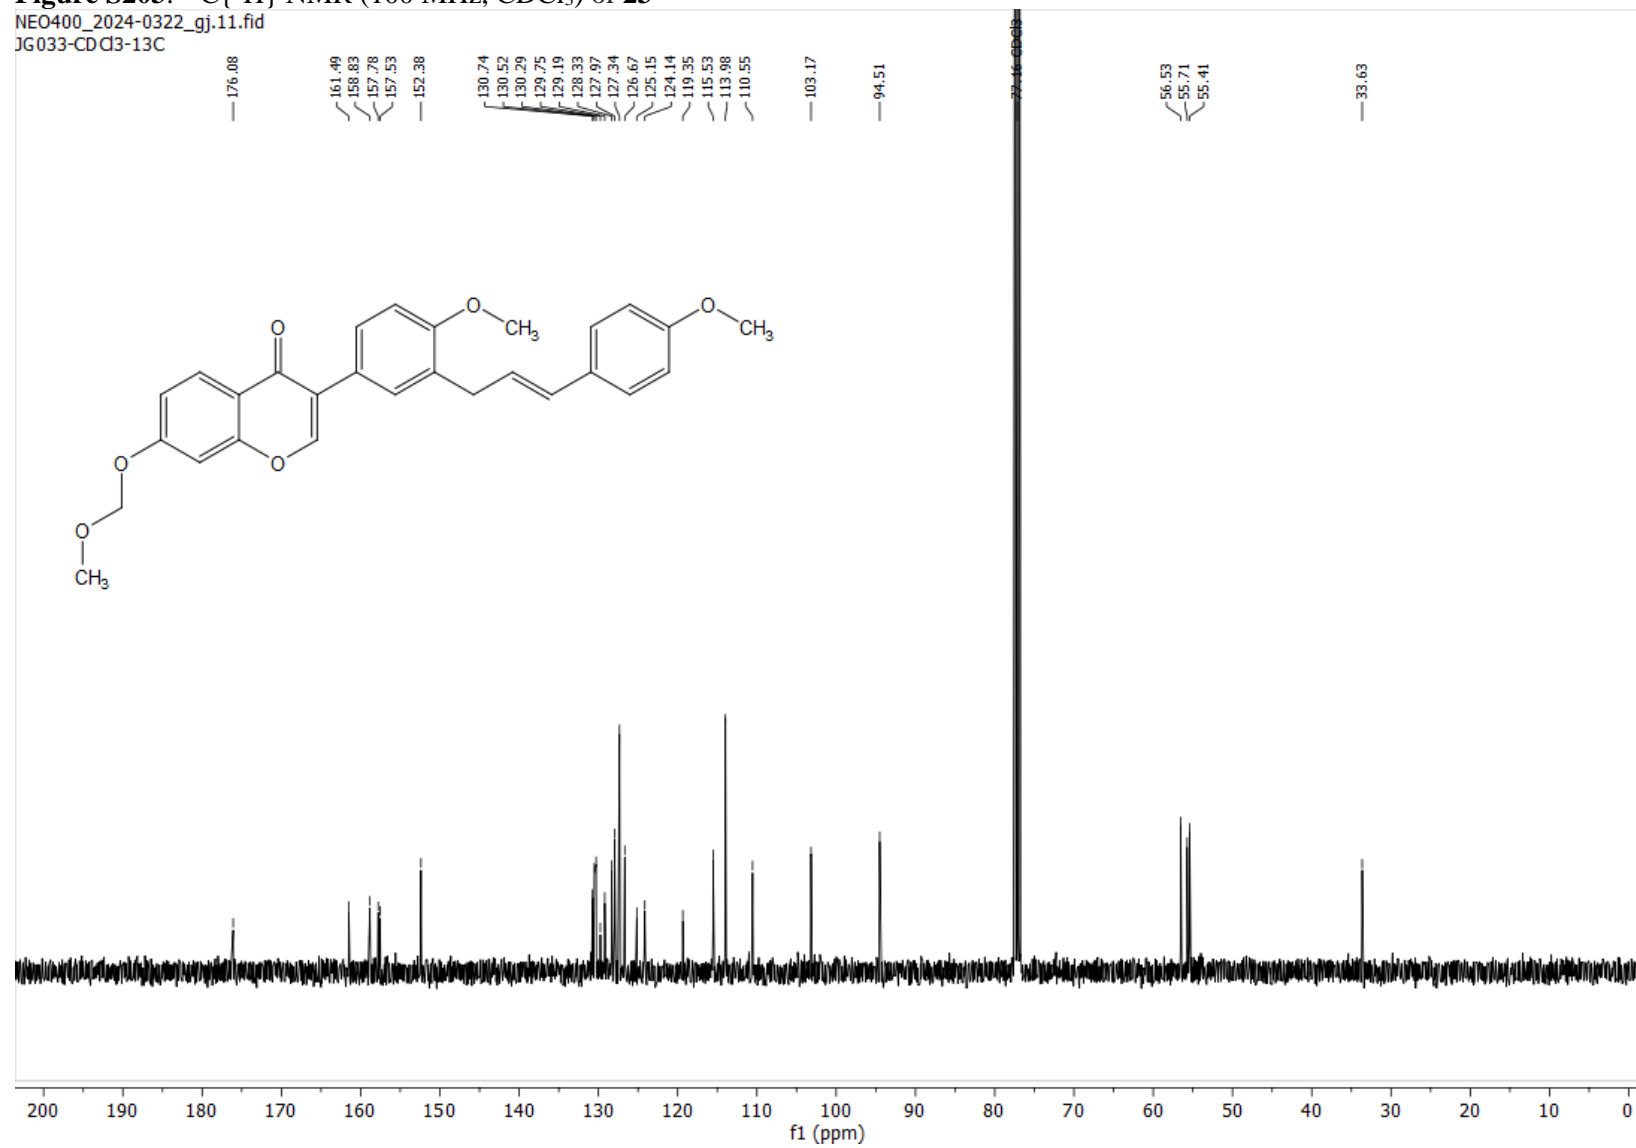

Figure S204: COSY (400 MHz, CDCl<sub>3</sub>) of 23

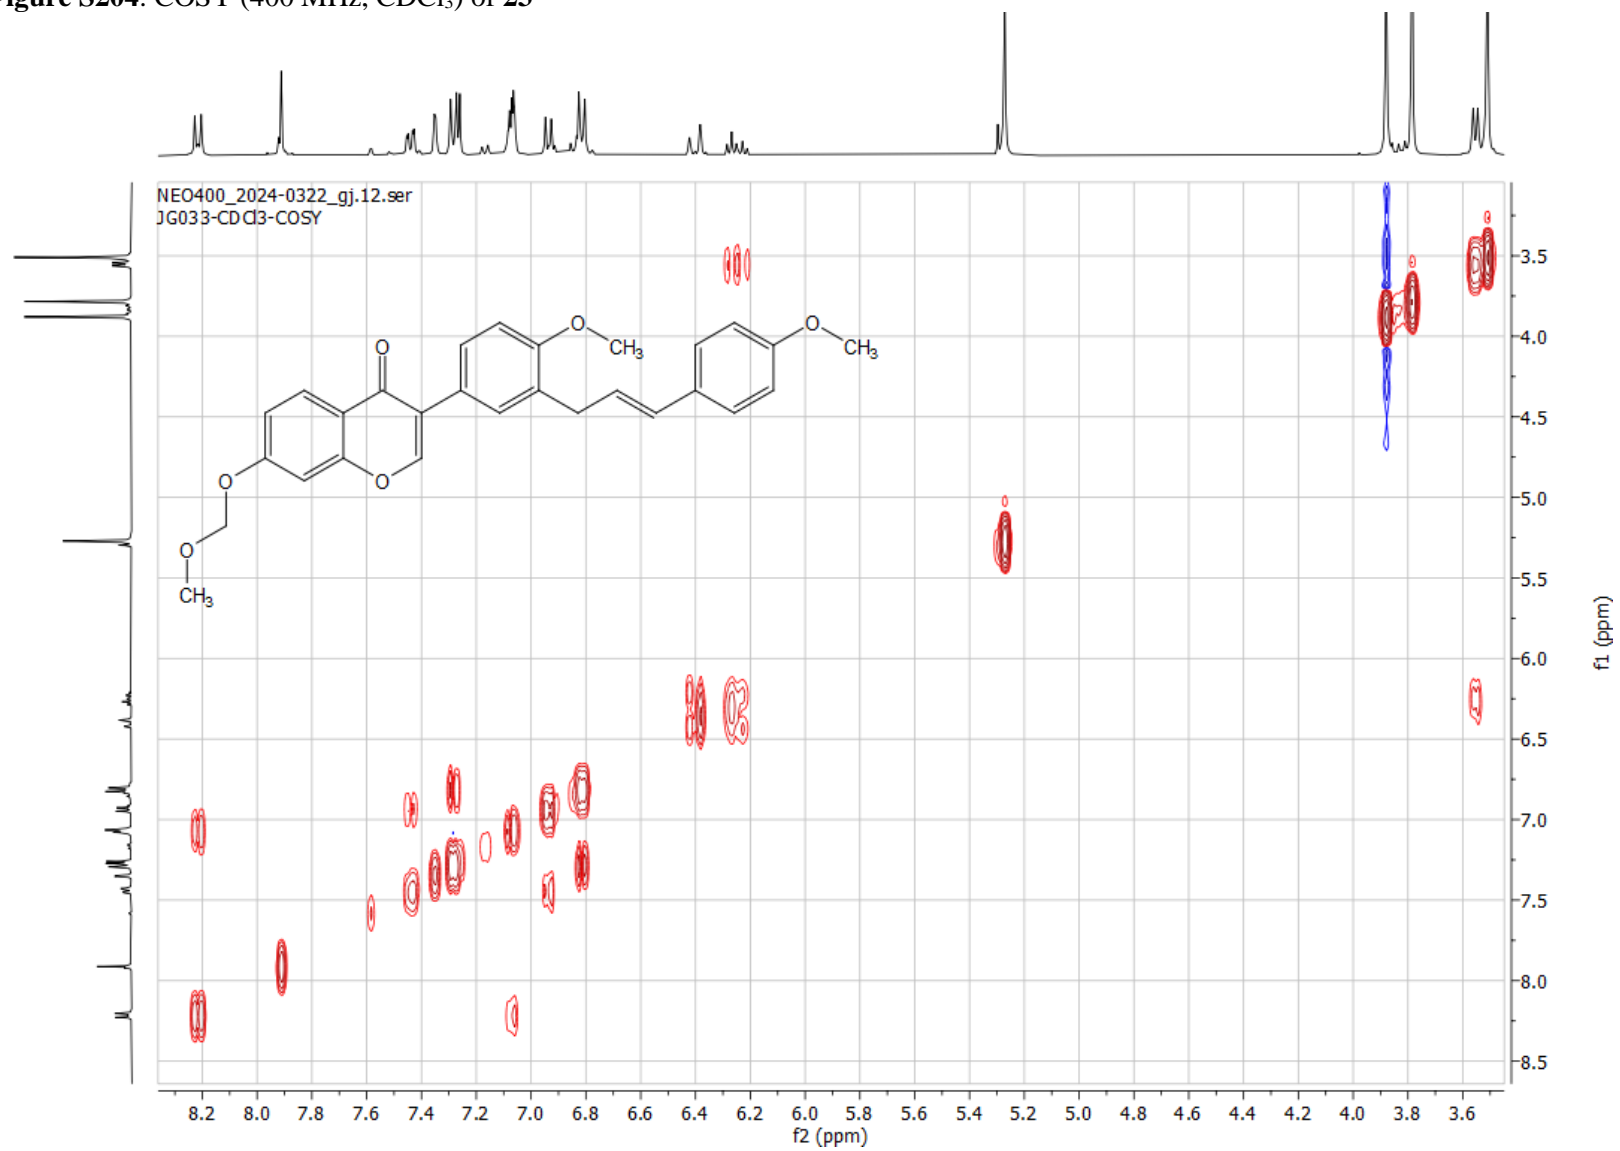

Figure S205: HSQC (400/100 MHz, CDCl<sub>3</sub>) of 23

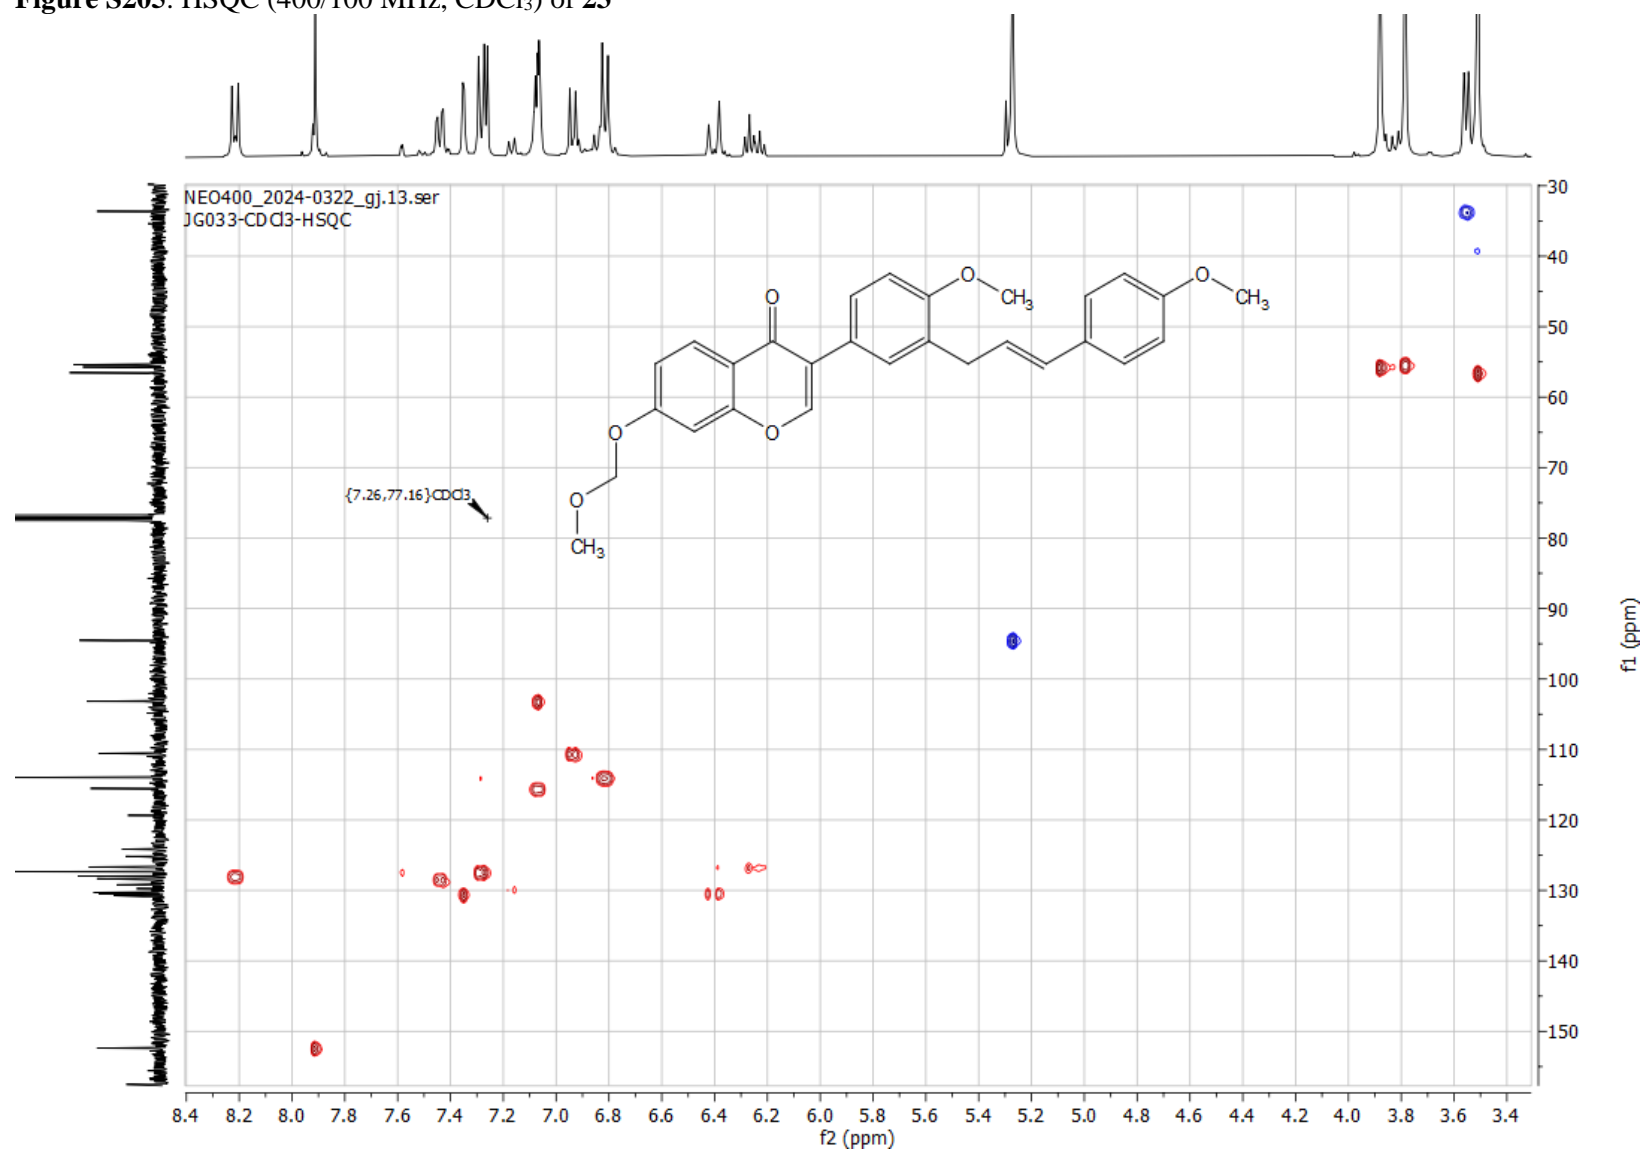



Figure S206: HMBC (400/100 MHz, CDCl<sub>3</sub>) of **23**

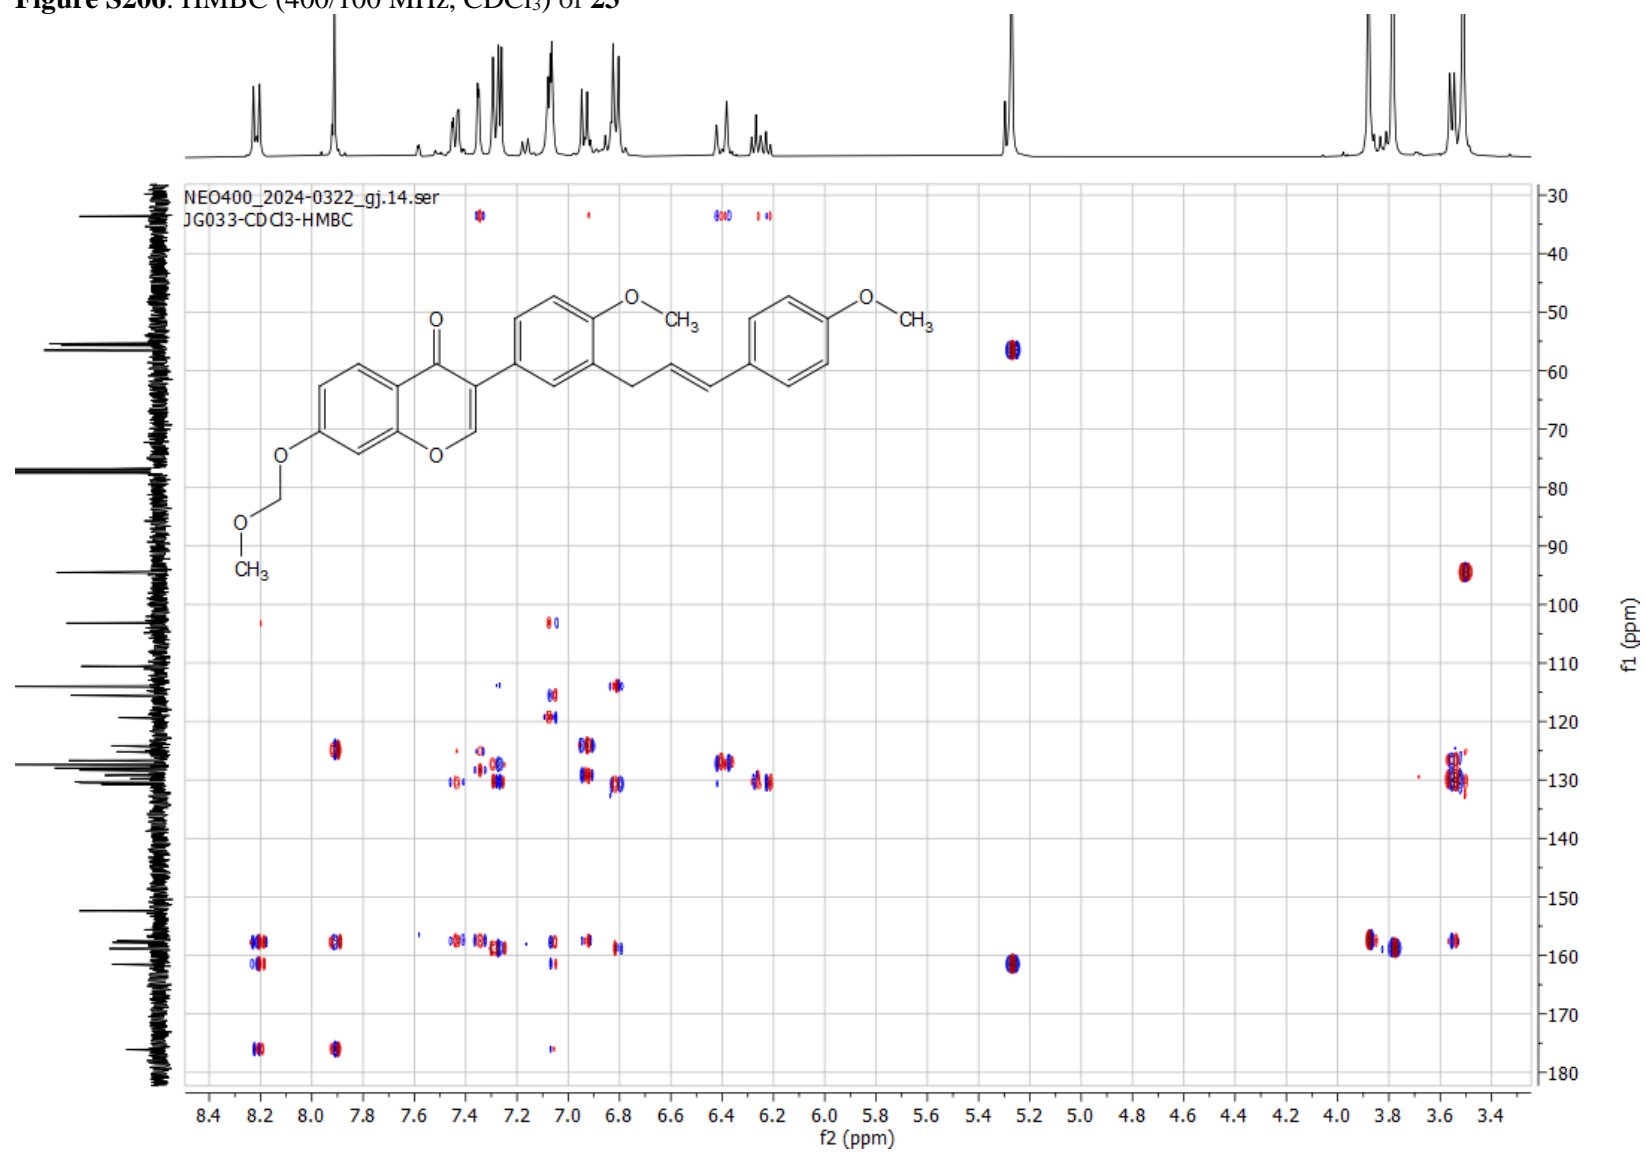

Figure S207: NOESY (400 MHz, CDCl<sub>3</sub>) of 23

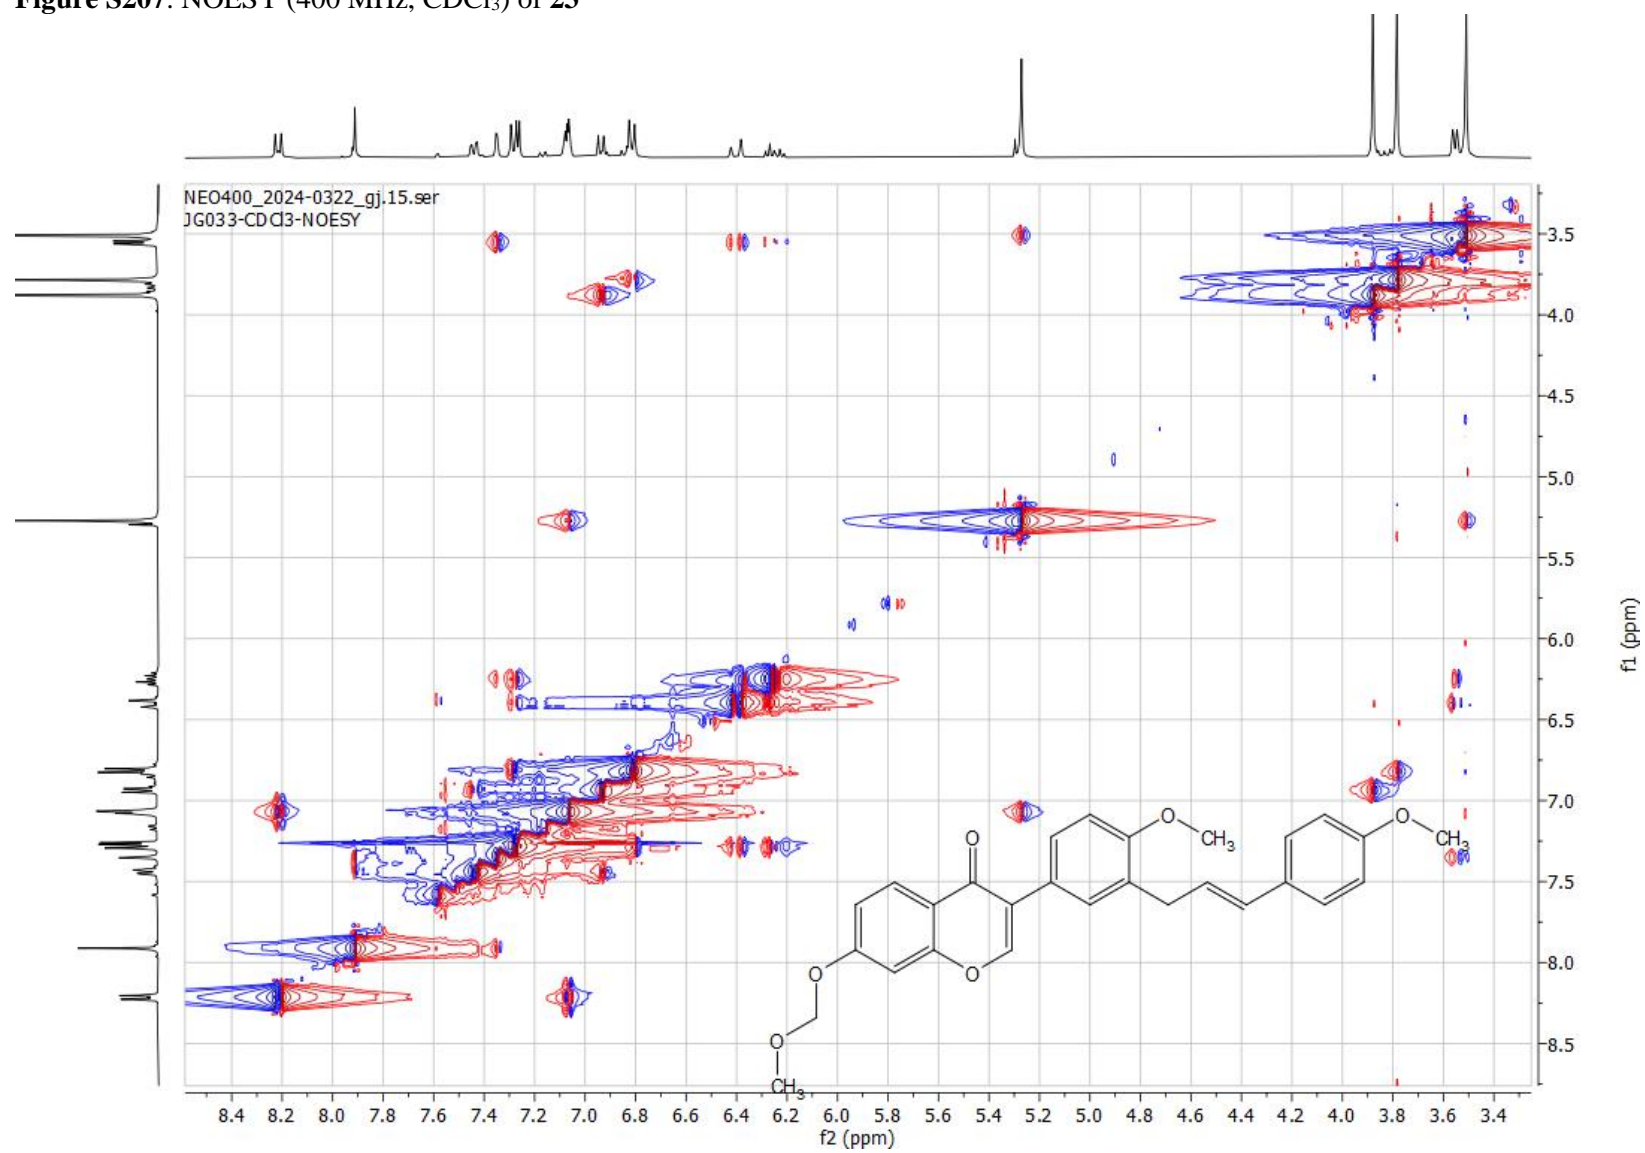

## D References

1. STOE & Cie GmbH (2018) X-Area. software package for collecting single-crystal data on STOE area-detector diffractometers, for image processing, for the correction and scaling of reflection intensities and for outlier rejection. STOE & Cie GmbH, Darmstadt.
2. Sheldrick, G. *Acta Cryst. C* **2015**, *C71*, 3-8.
3. Sheldrick, G. *Acta Cryst. A* **2008**, *A64*, 112-122.
4. Kratzert, D. FinalCif. Version V113; online available at: <https://dkratzert.de/finalcif.html> (last accession date: 2023-03-09).
5. Bandenburg, K. and H. Putz (2020) Crystal Impact Diamond. Diamond - Crystal and Molecular Structure Visualization, Bonn, Germany.
6. Amin, S.; Hecht, S. S.; LaVoie, E.; Hoffmann, D. *J. Med. Chem.* **1979**, *22*, 1336-1340.
7. Sasiambarrena, L. D.; Cánepa, A. S.; Luna, C. N.; Bravo, R. D. *Tetrahedron Lett.* **2015**, *56*, 2054-2058.
8. Terzic, V.; Pousse, G.; Méallet-Renault, R.; Grellier, P.; Dubois, J. *J. Org. Chem.* **2019**, *84*, 8542-8551.
9. Liu, C.-F.; Wang, H.; Martin, R. T.; Zhao, H.; Gutierrez, O.; Koh, M. J. *Nat. Catal.* **2021**, *4*, 674-683.
